# Supplementary material for: Nuclear genetic regulation of the human mitochondrial transcriptome
Source: eLife journal article supplement (doi:10.7554/elife.41927), 2019-02-18

Figure 2-figure supplement 1: Forest plots for each peak variant detected in association analyses. Each plot contains Beta estimates and confidence intervals for each of the datasets and tissues considered in the study.

## rs782633 : MTCYB

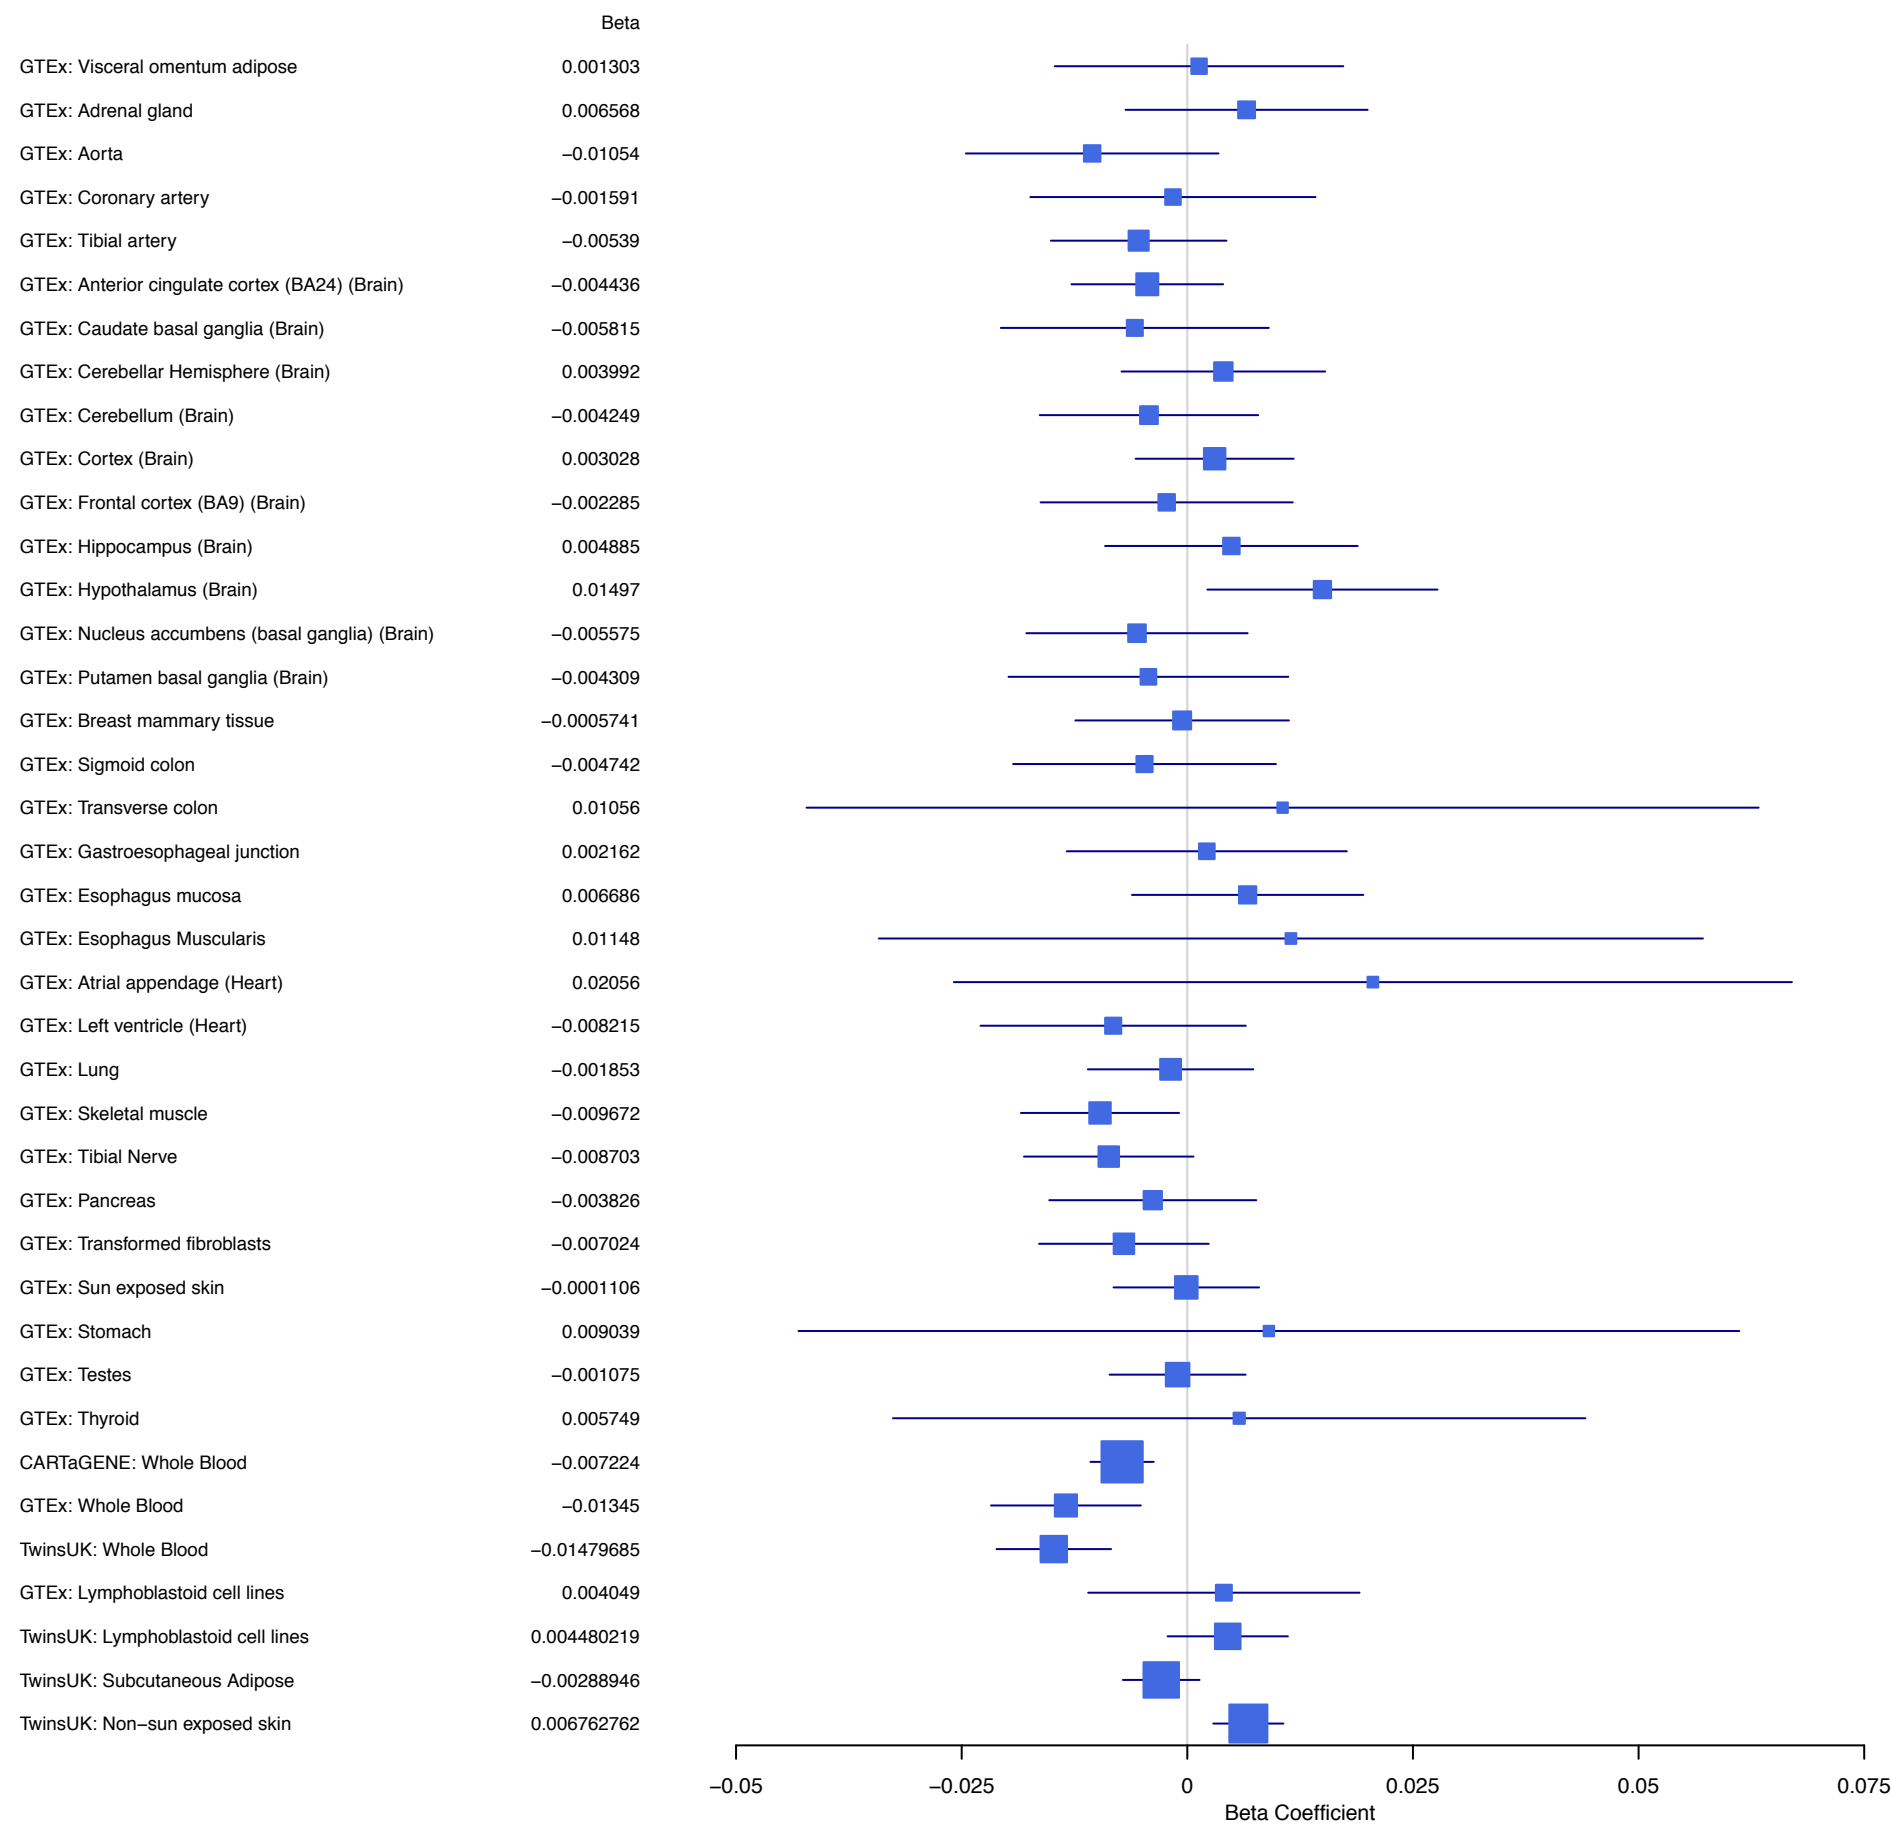

## rs932345 : MTND4L

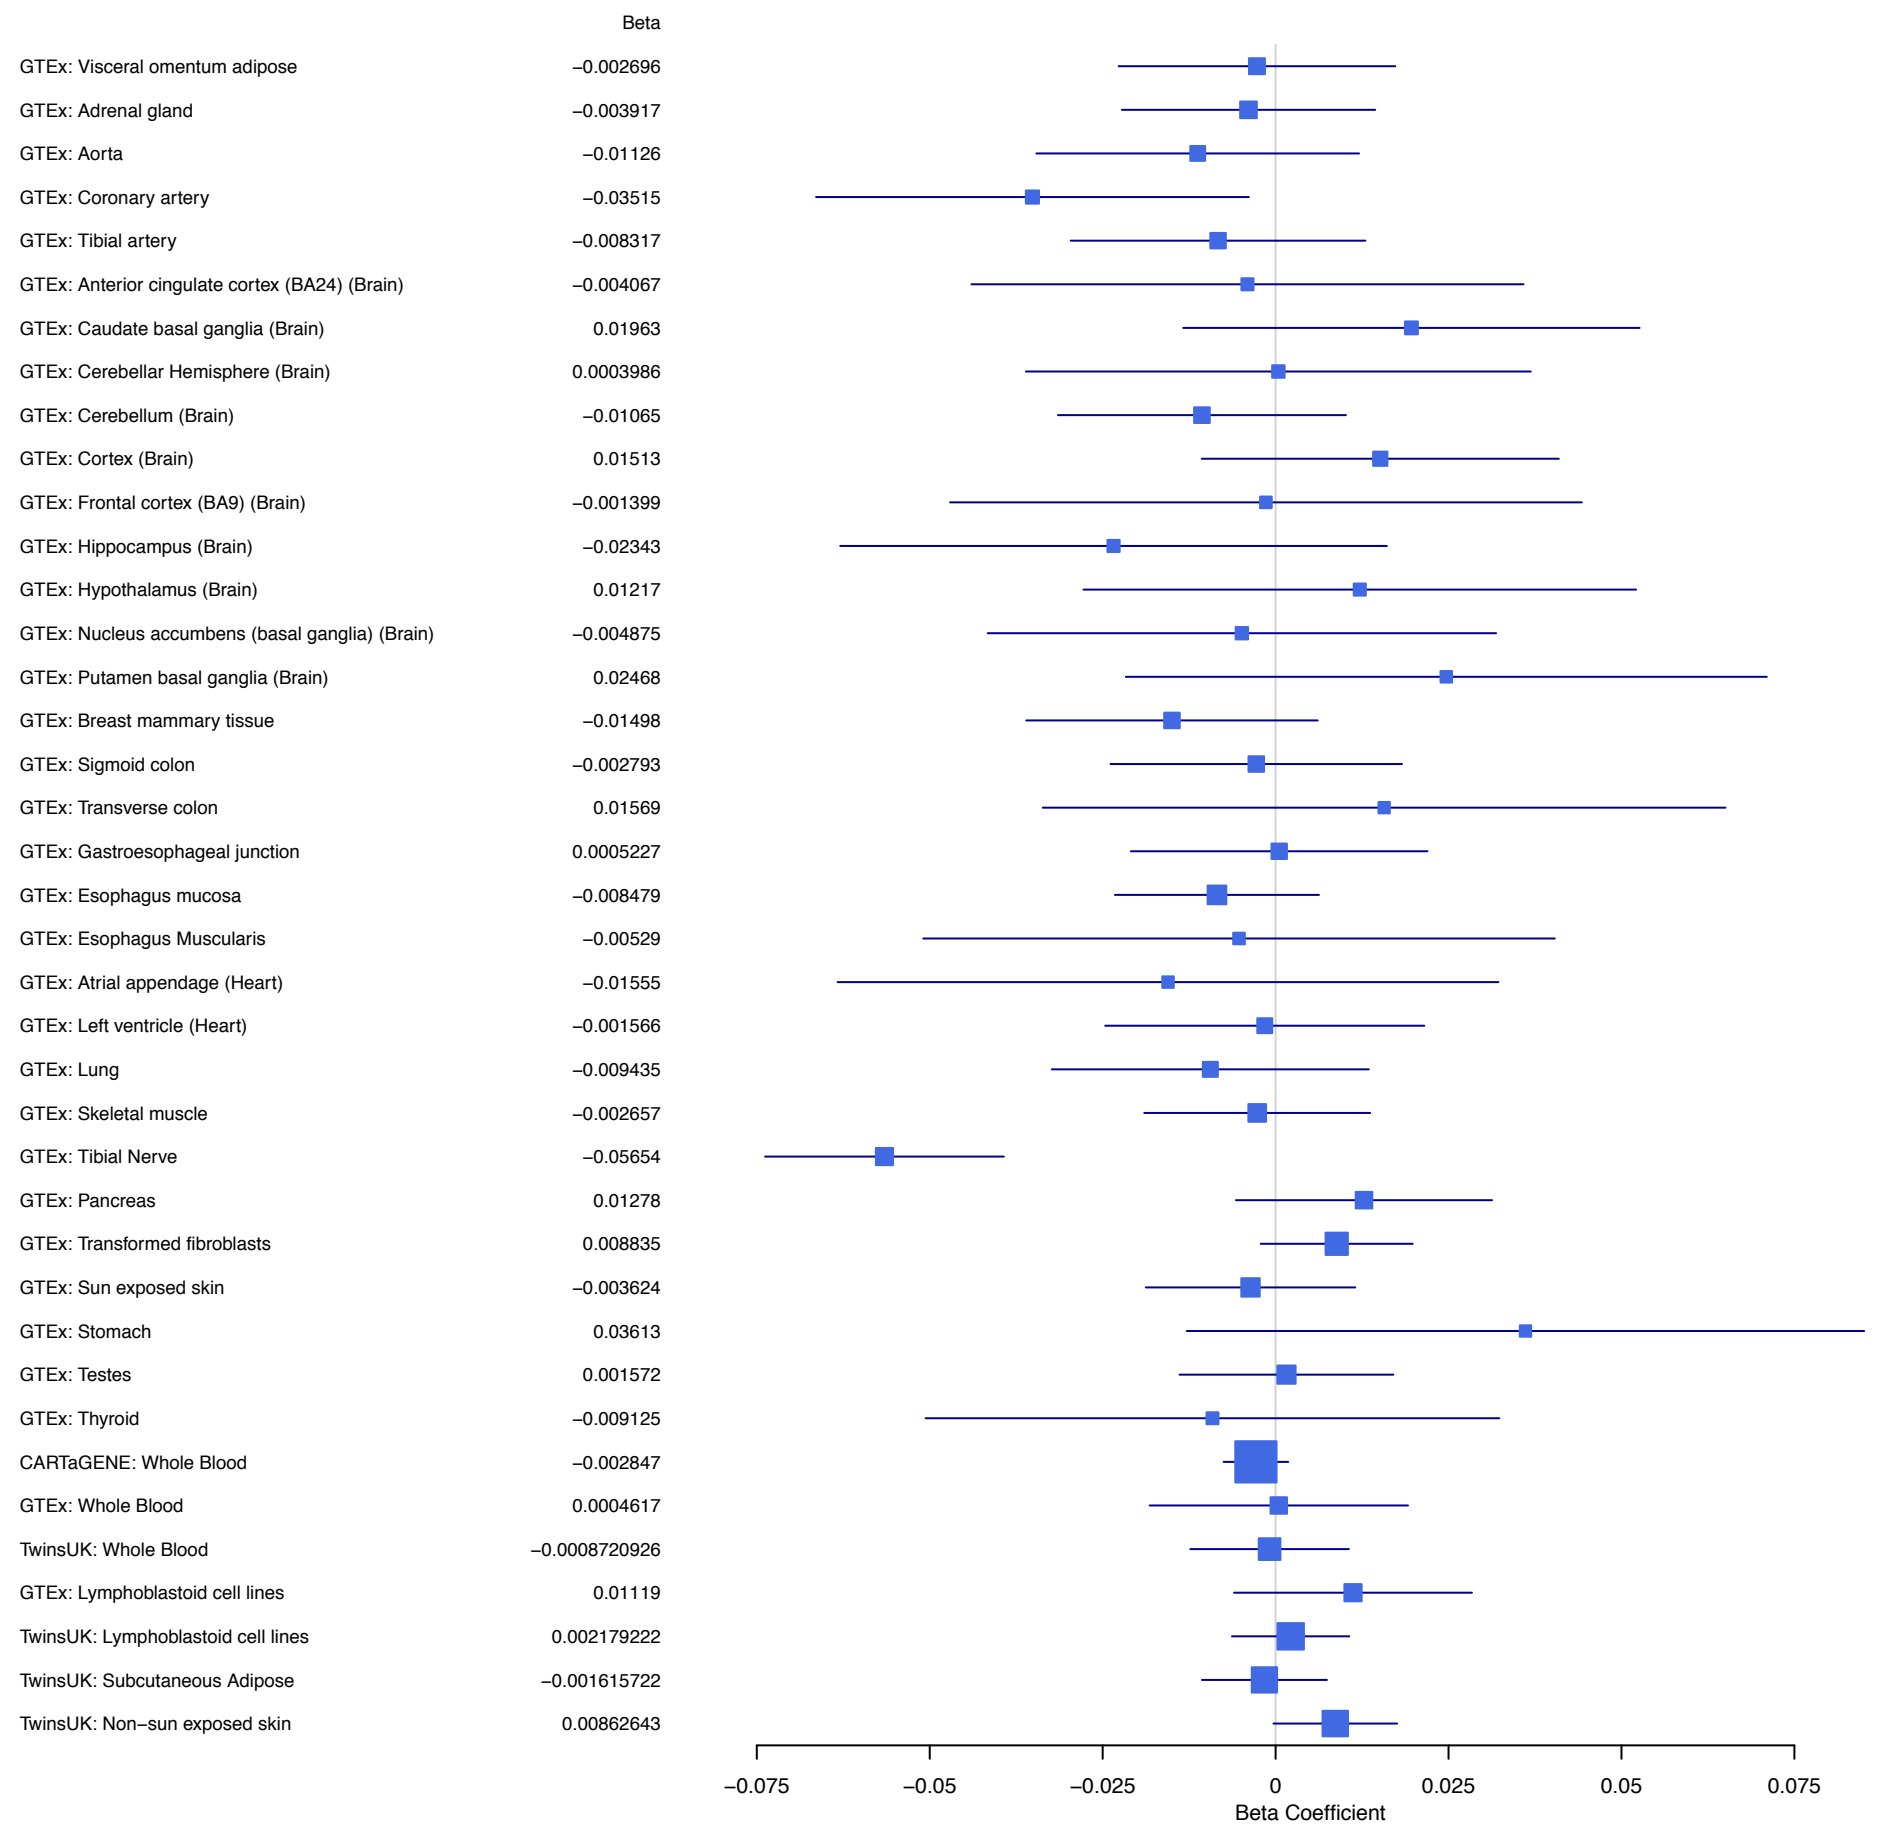

## rs1047991 : MTND3

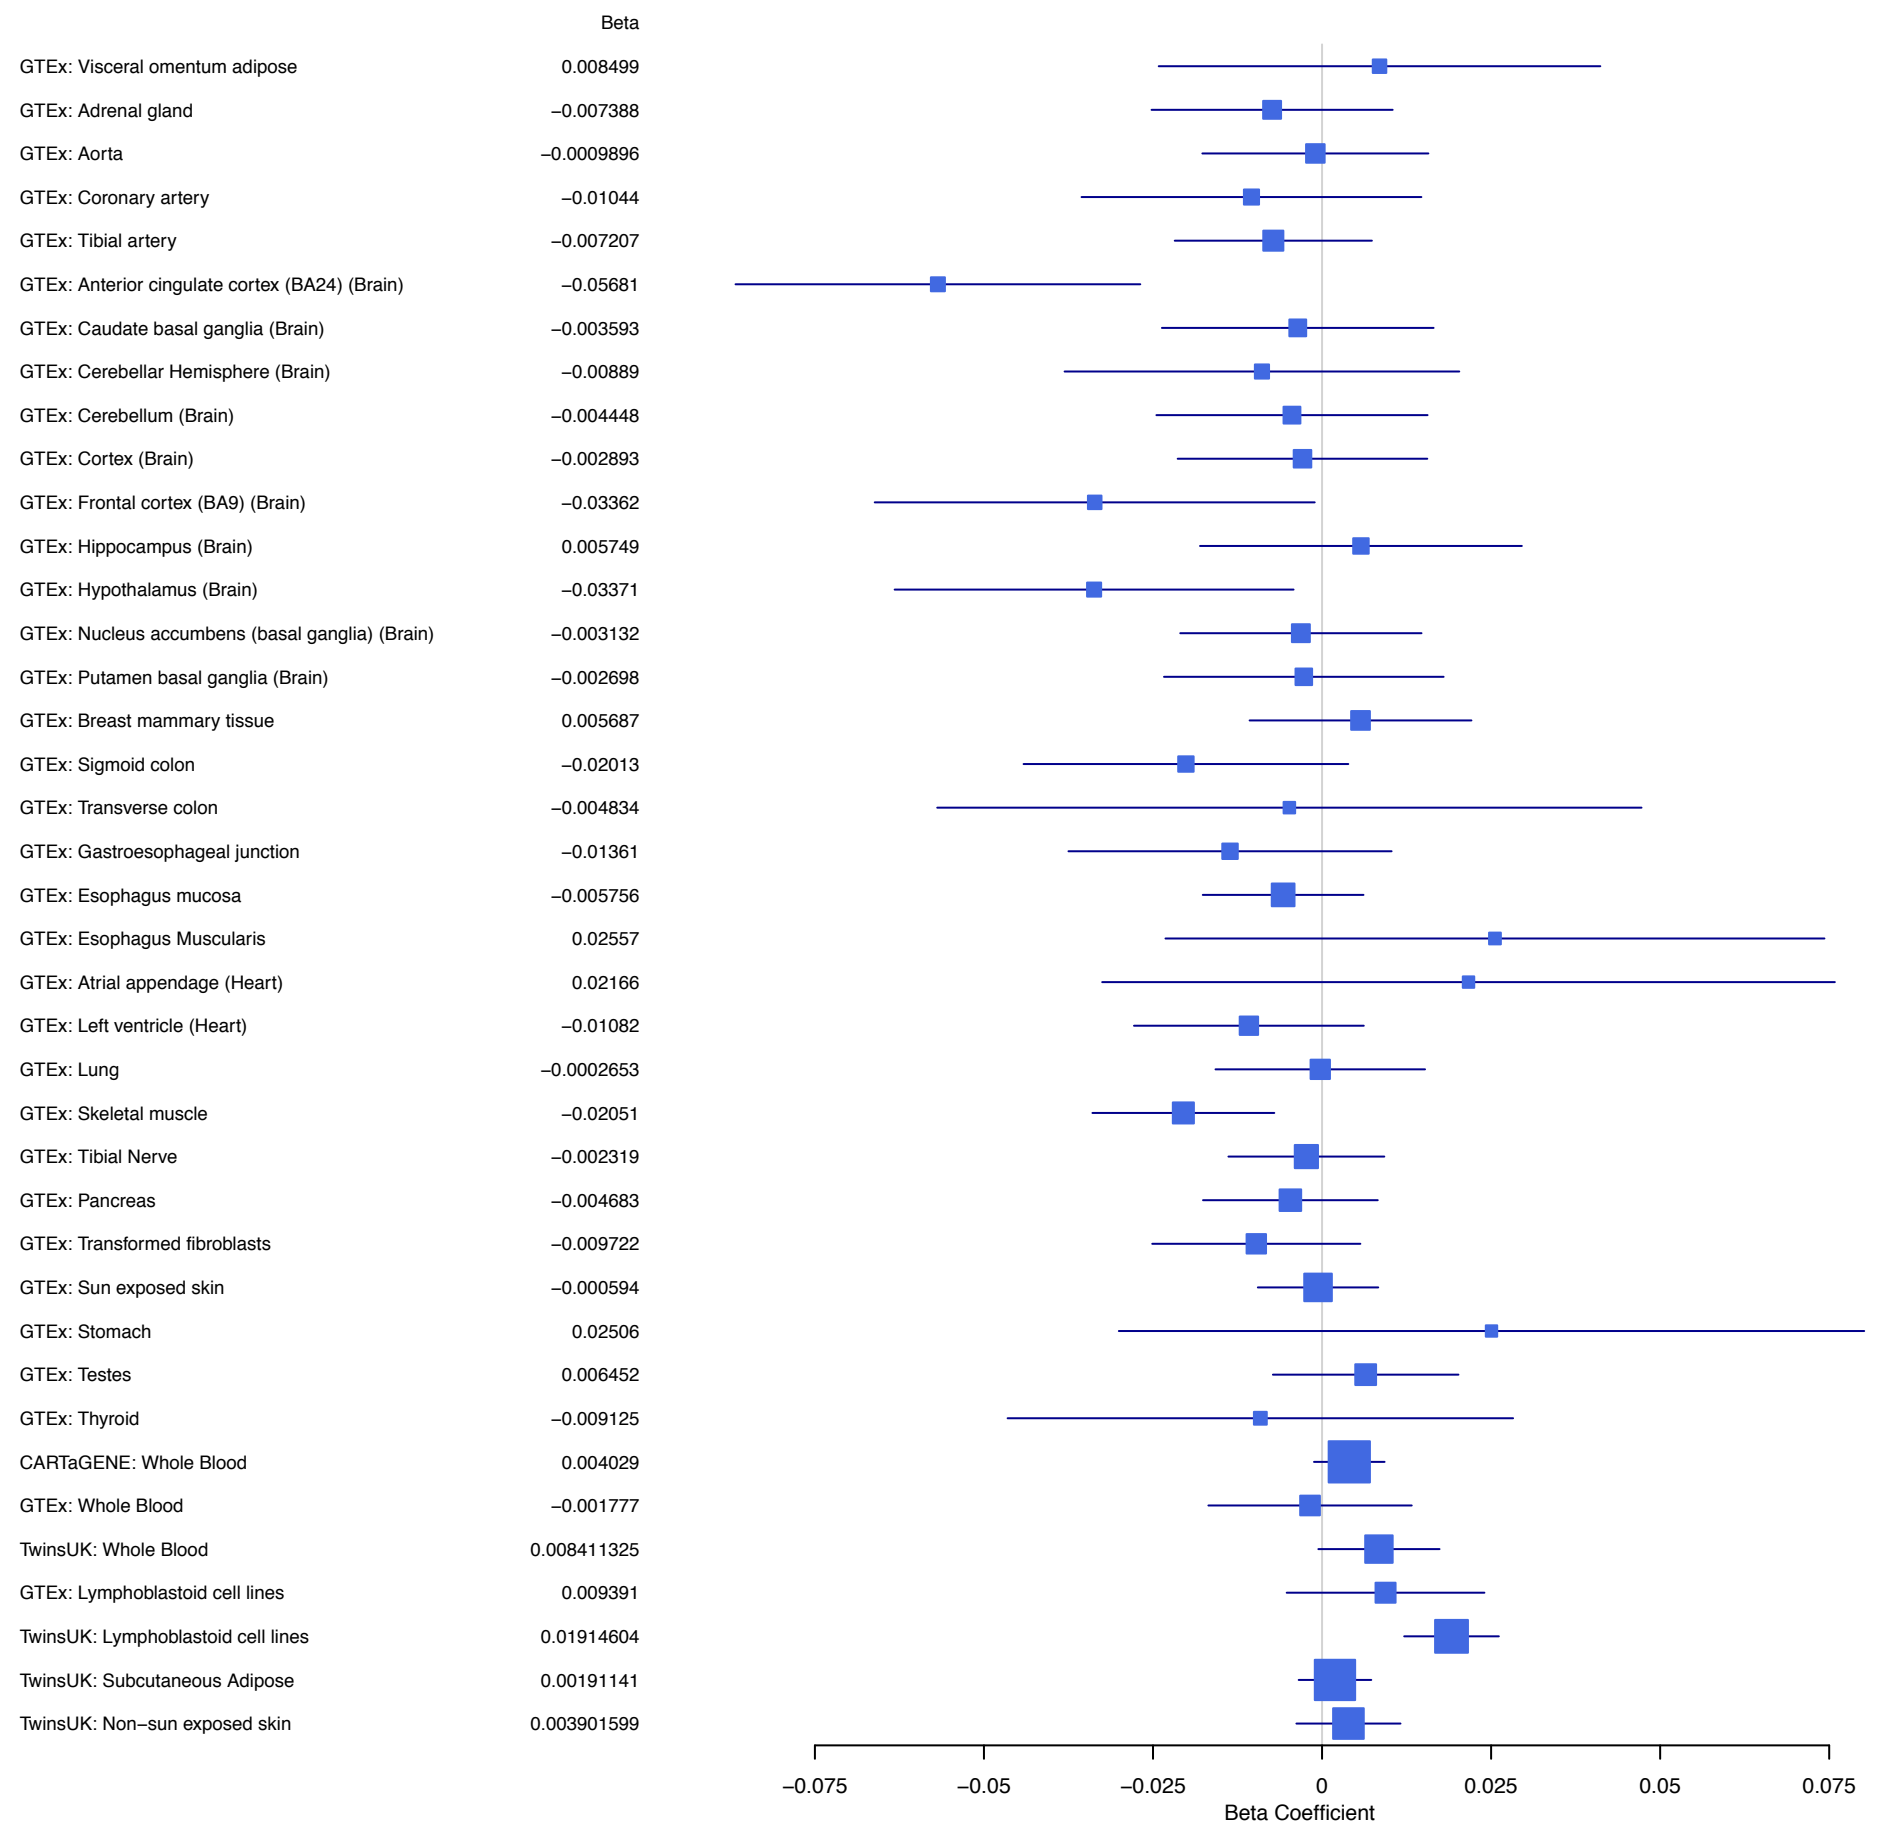

## rs1372635 : MTCYB

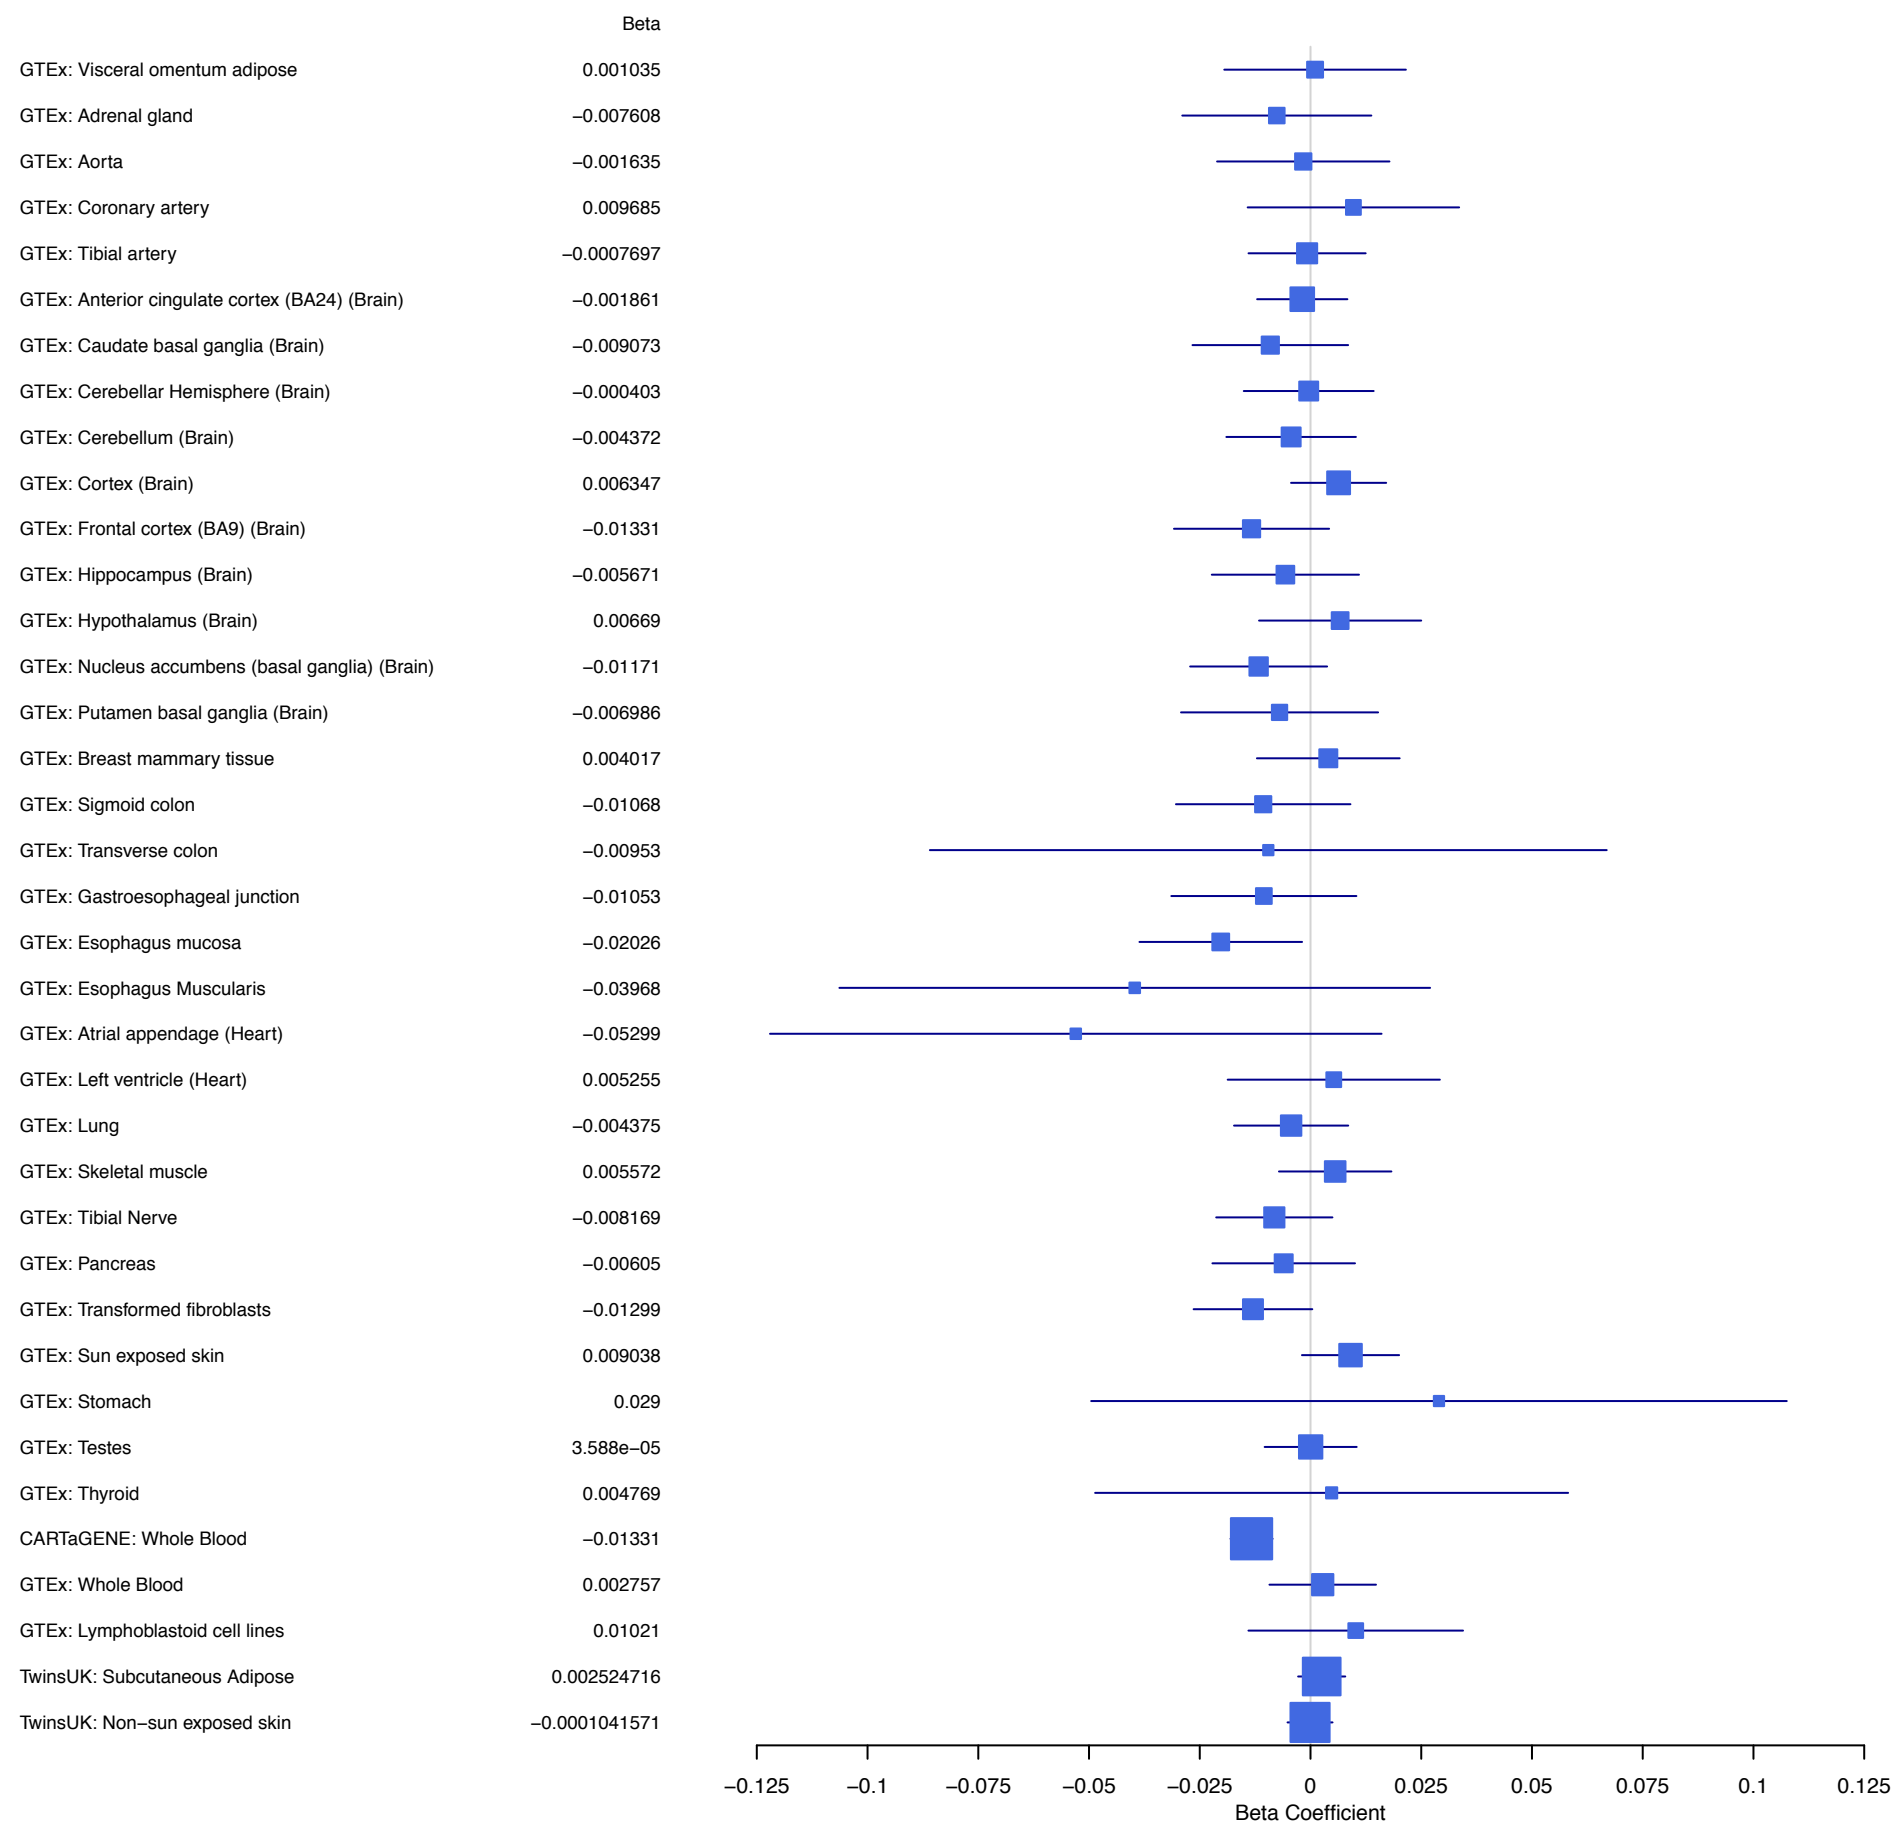

## rs1692120 : MTND1

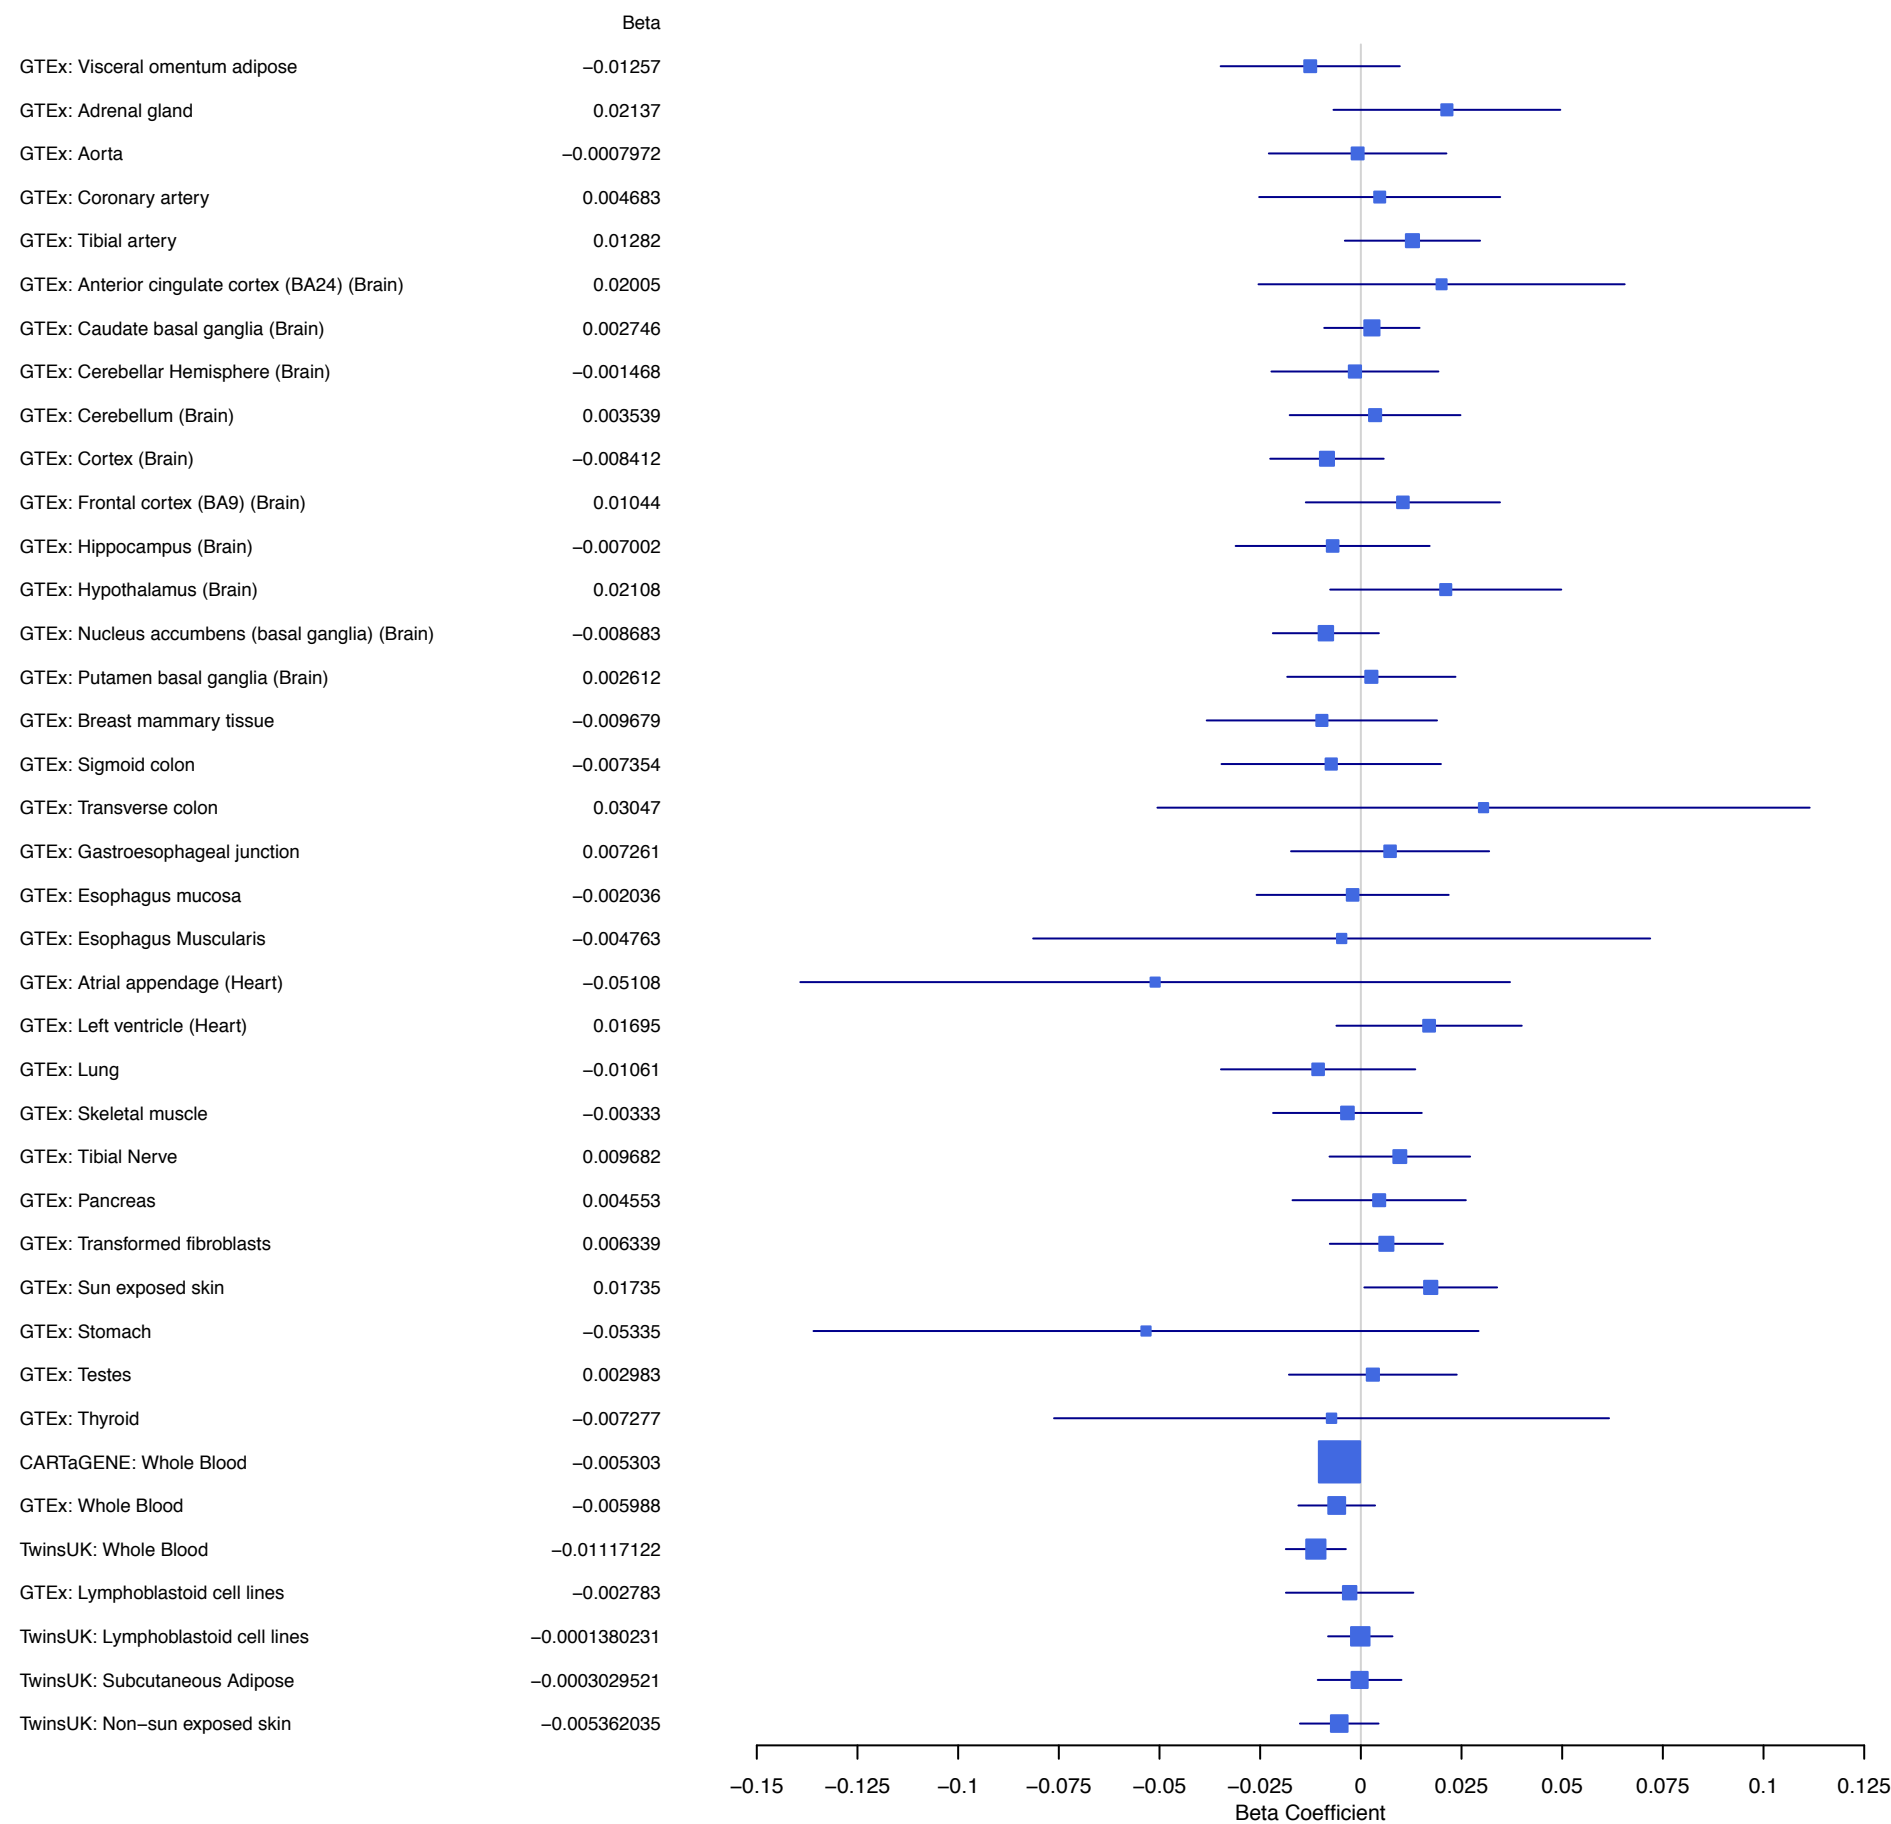

## rs2304693 : MTCO2

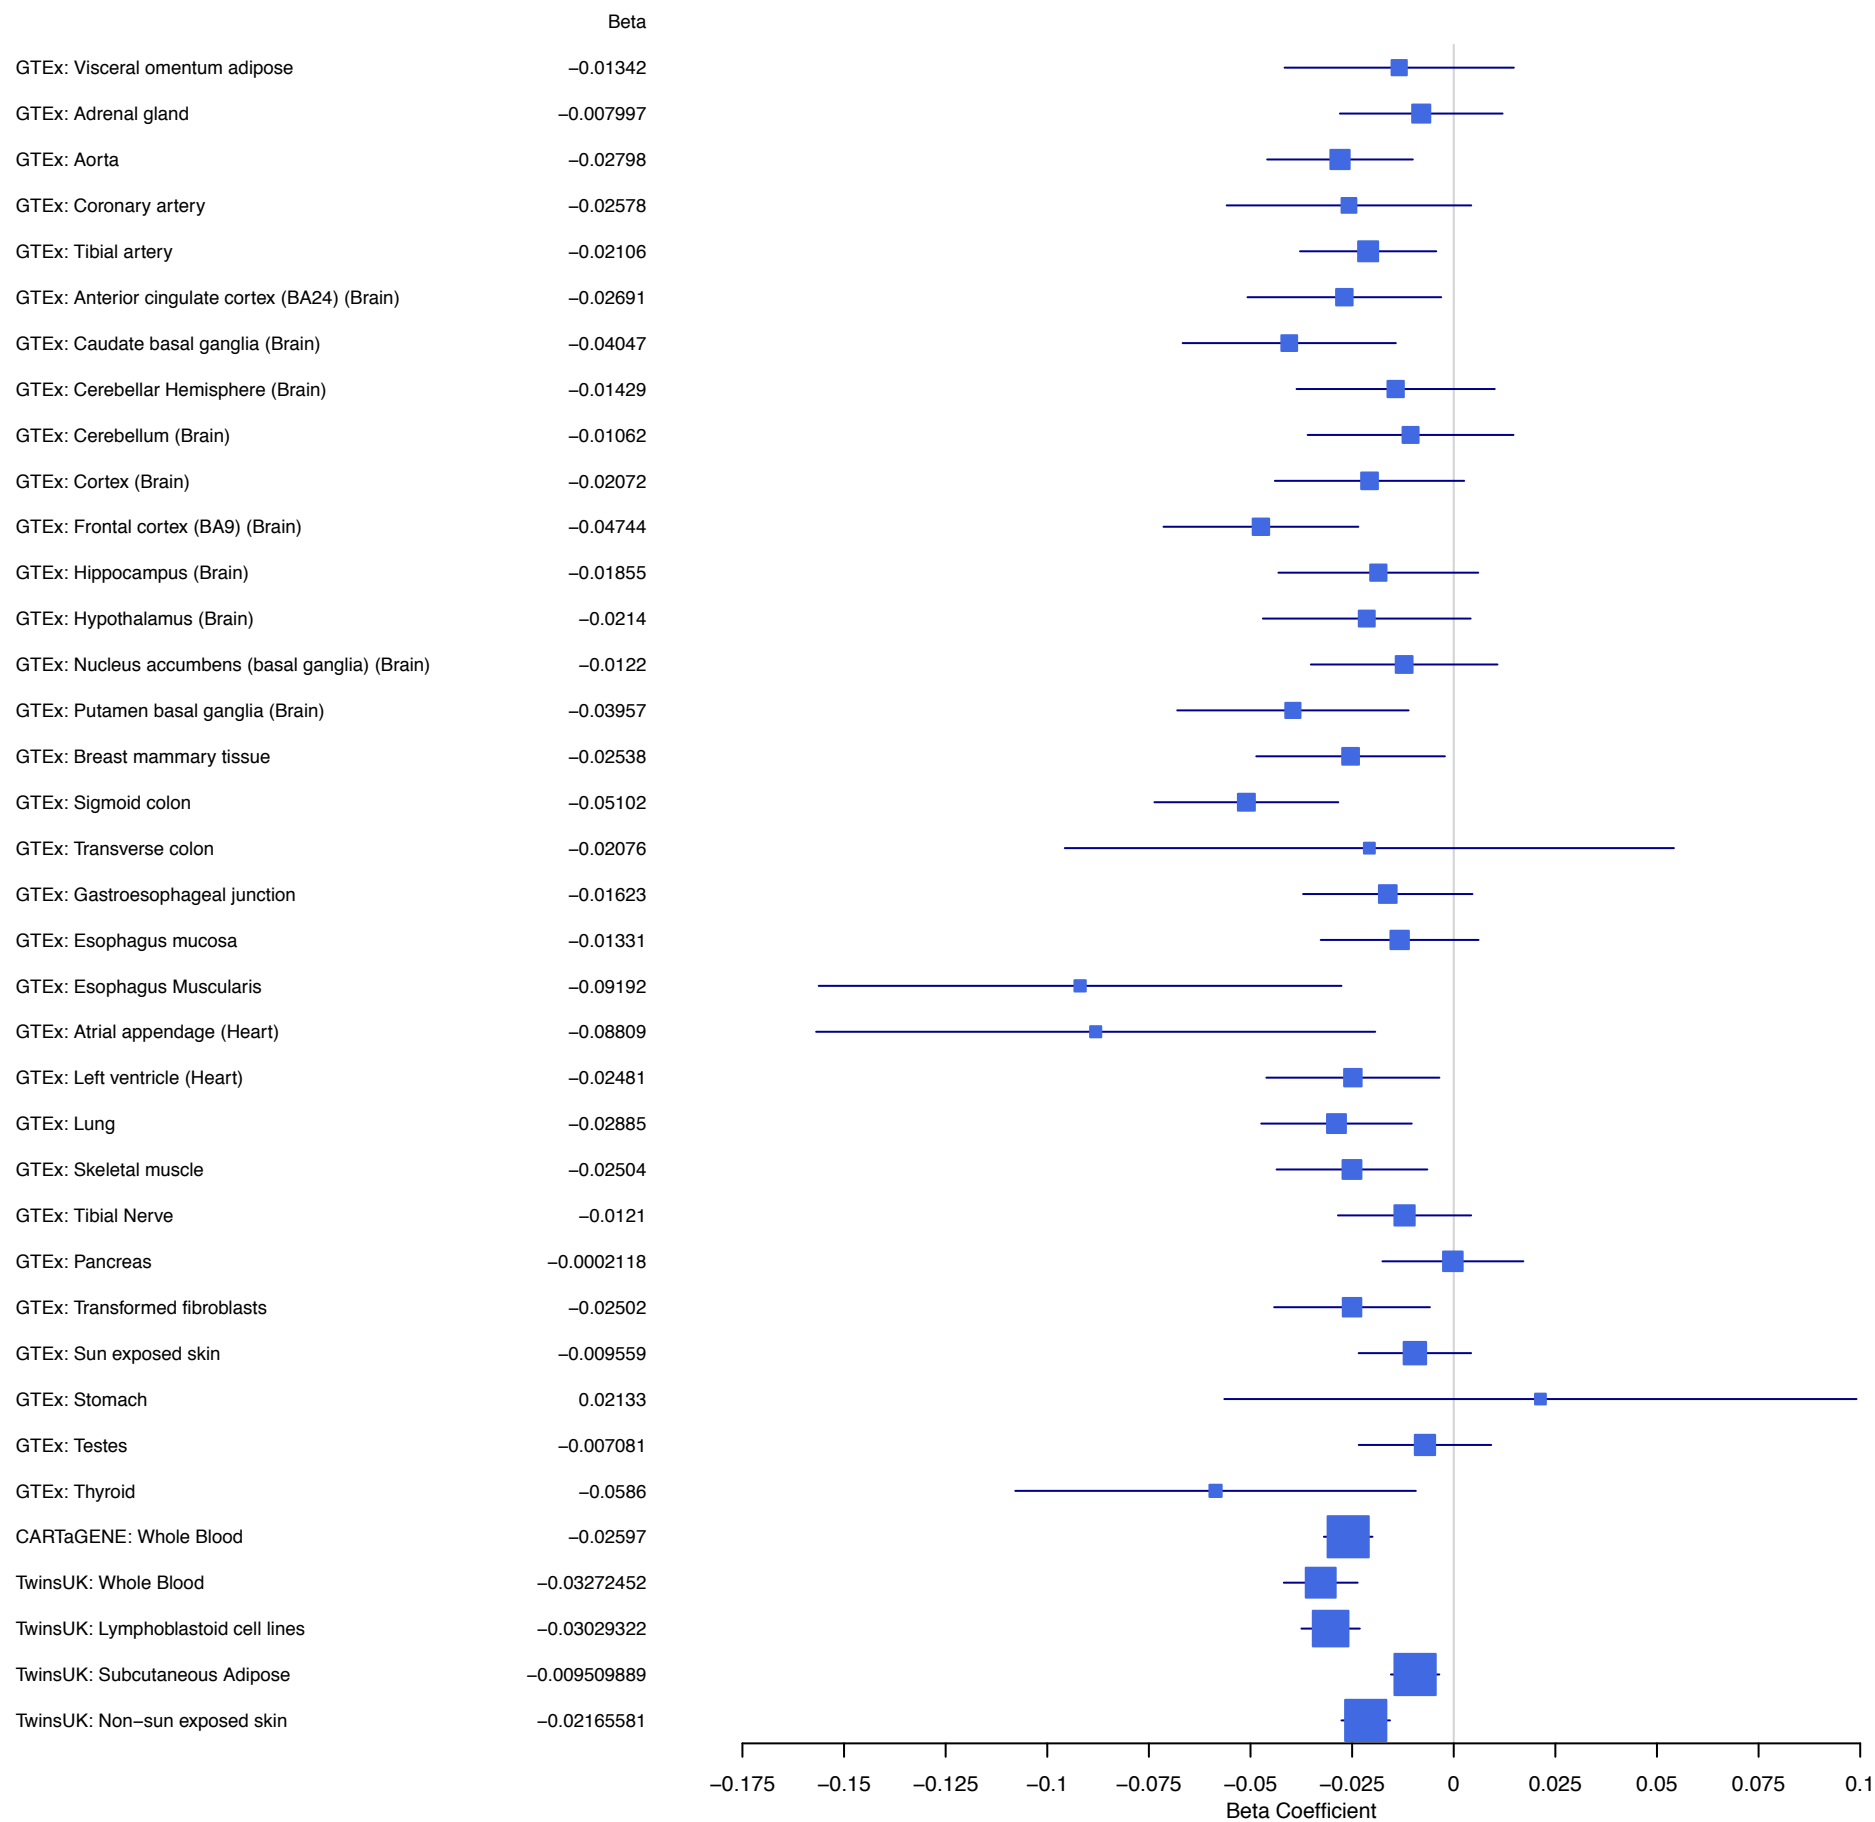

rs2304693 : MTCO3

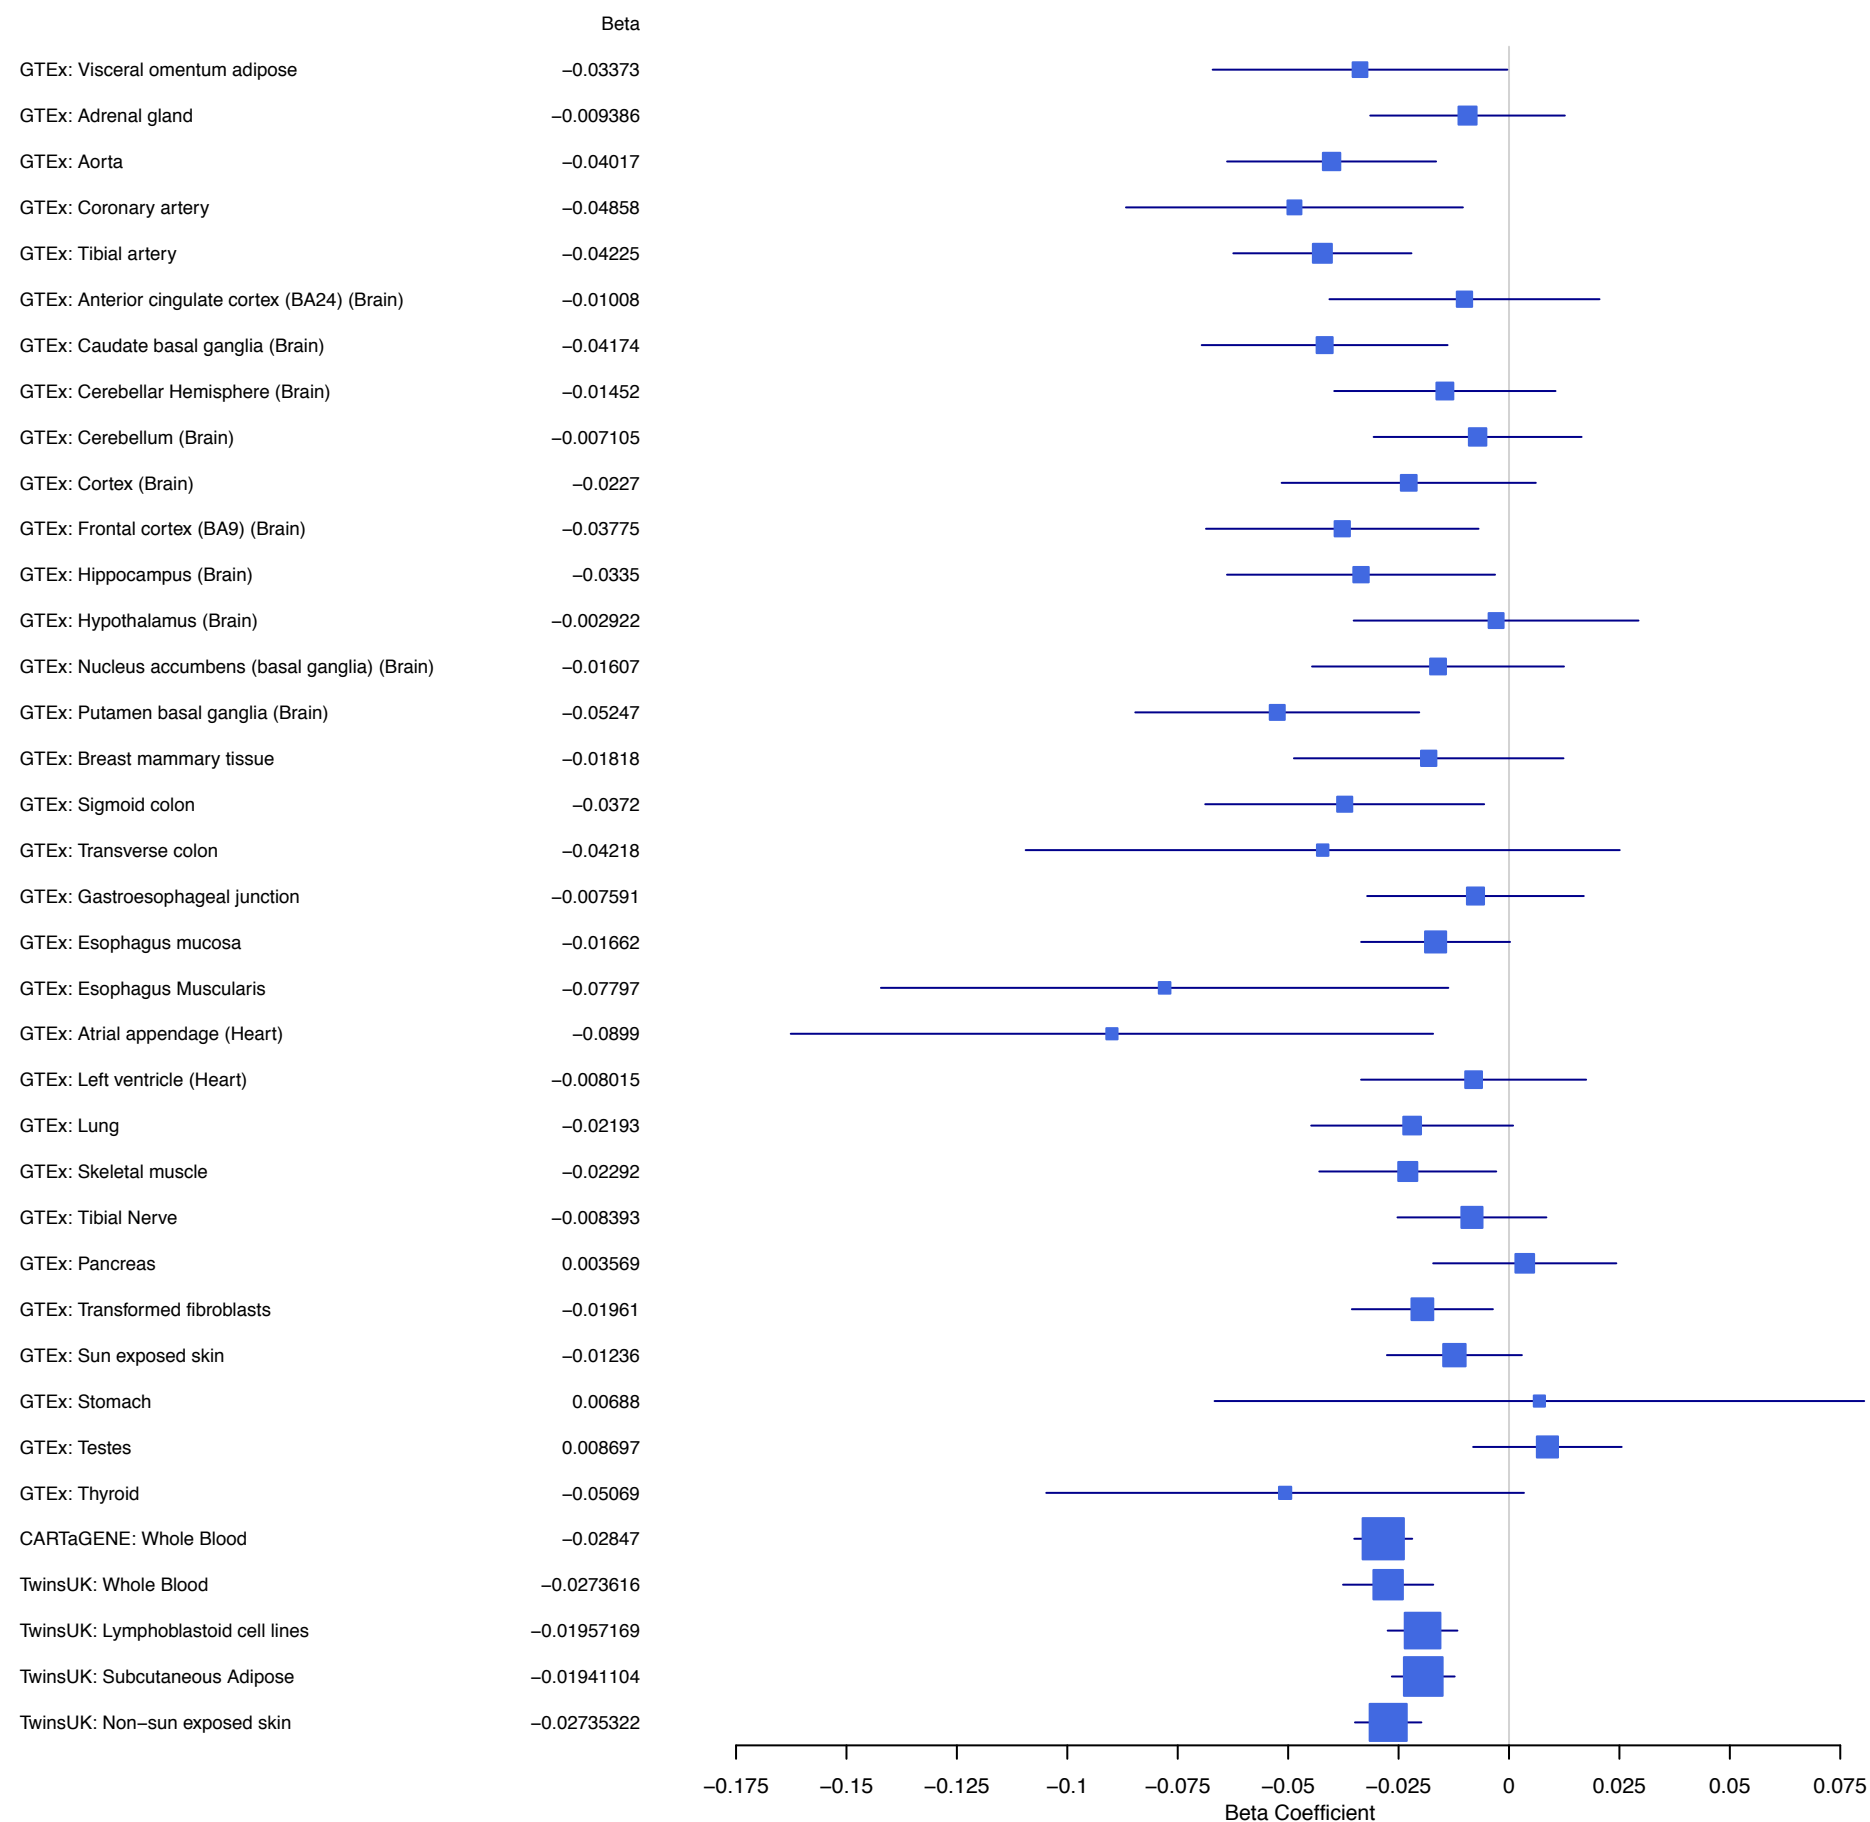

## rs2304693 : MTCYB

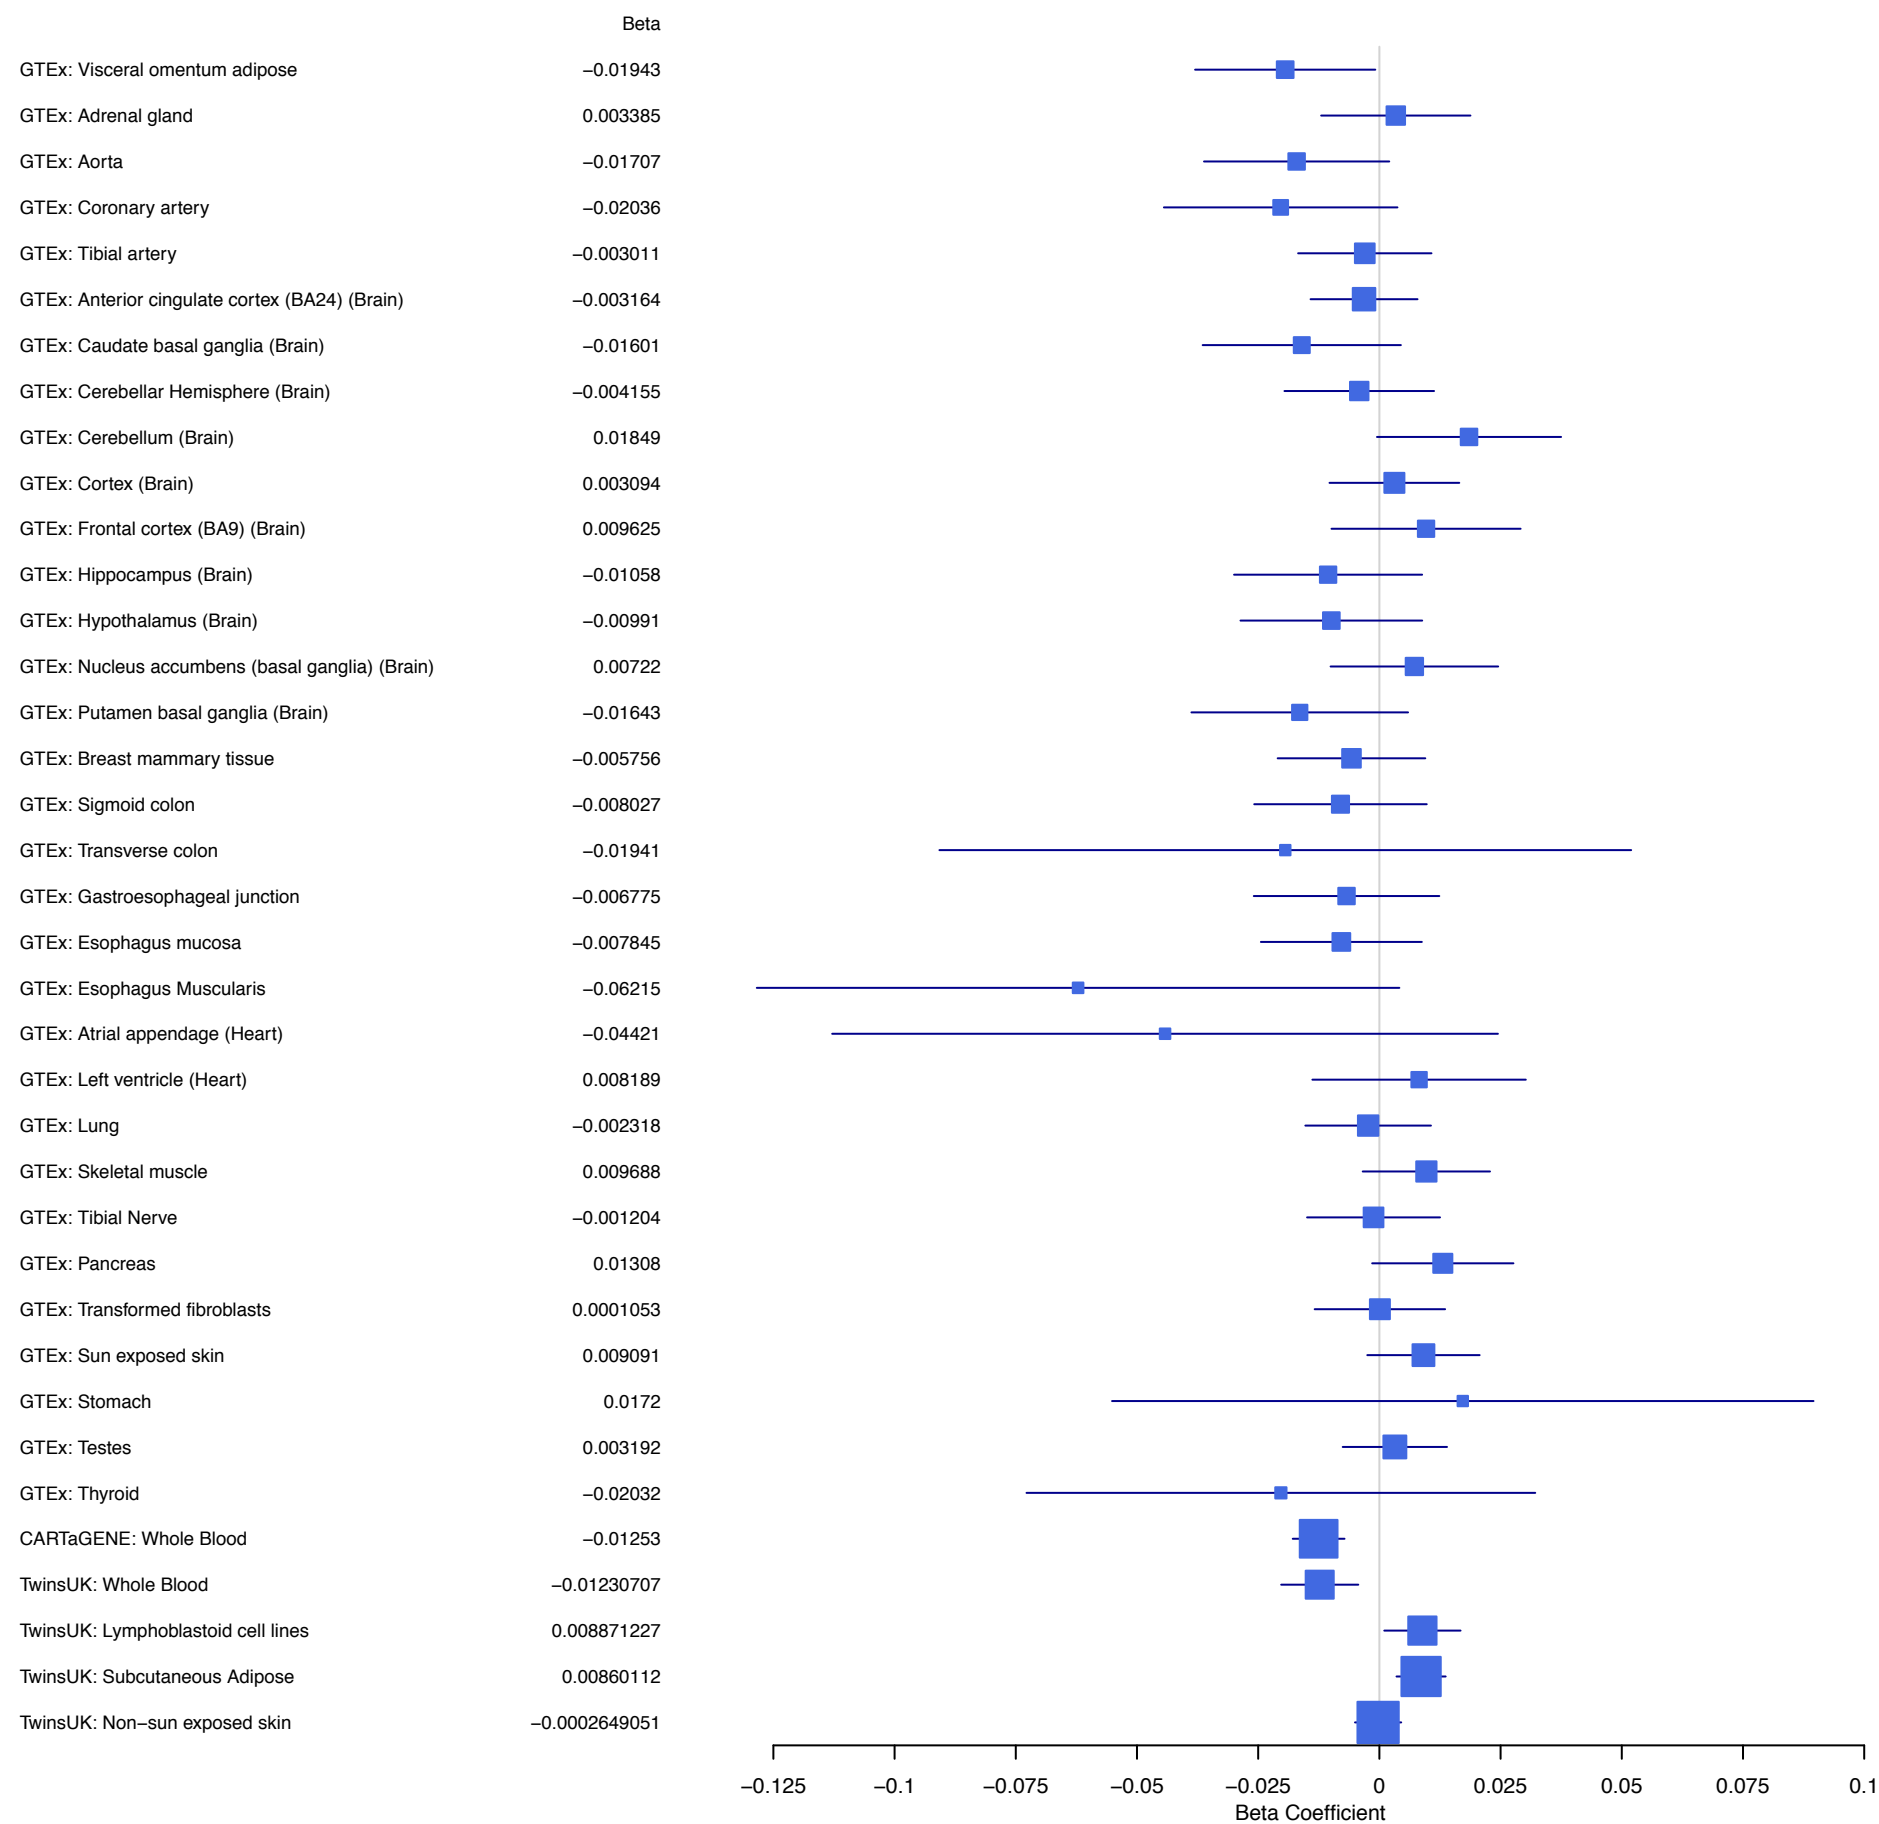

rs2304694 : MTCO2

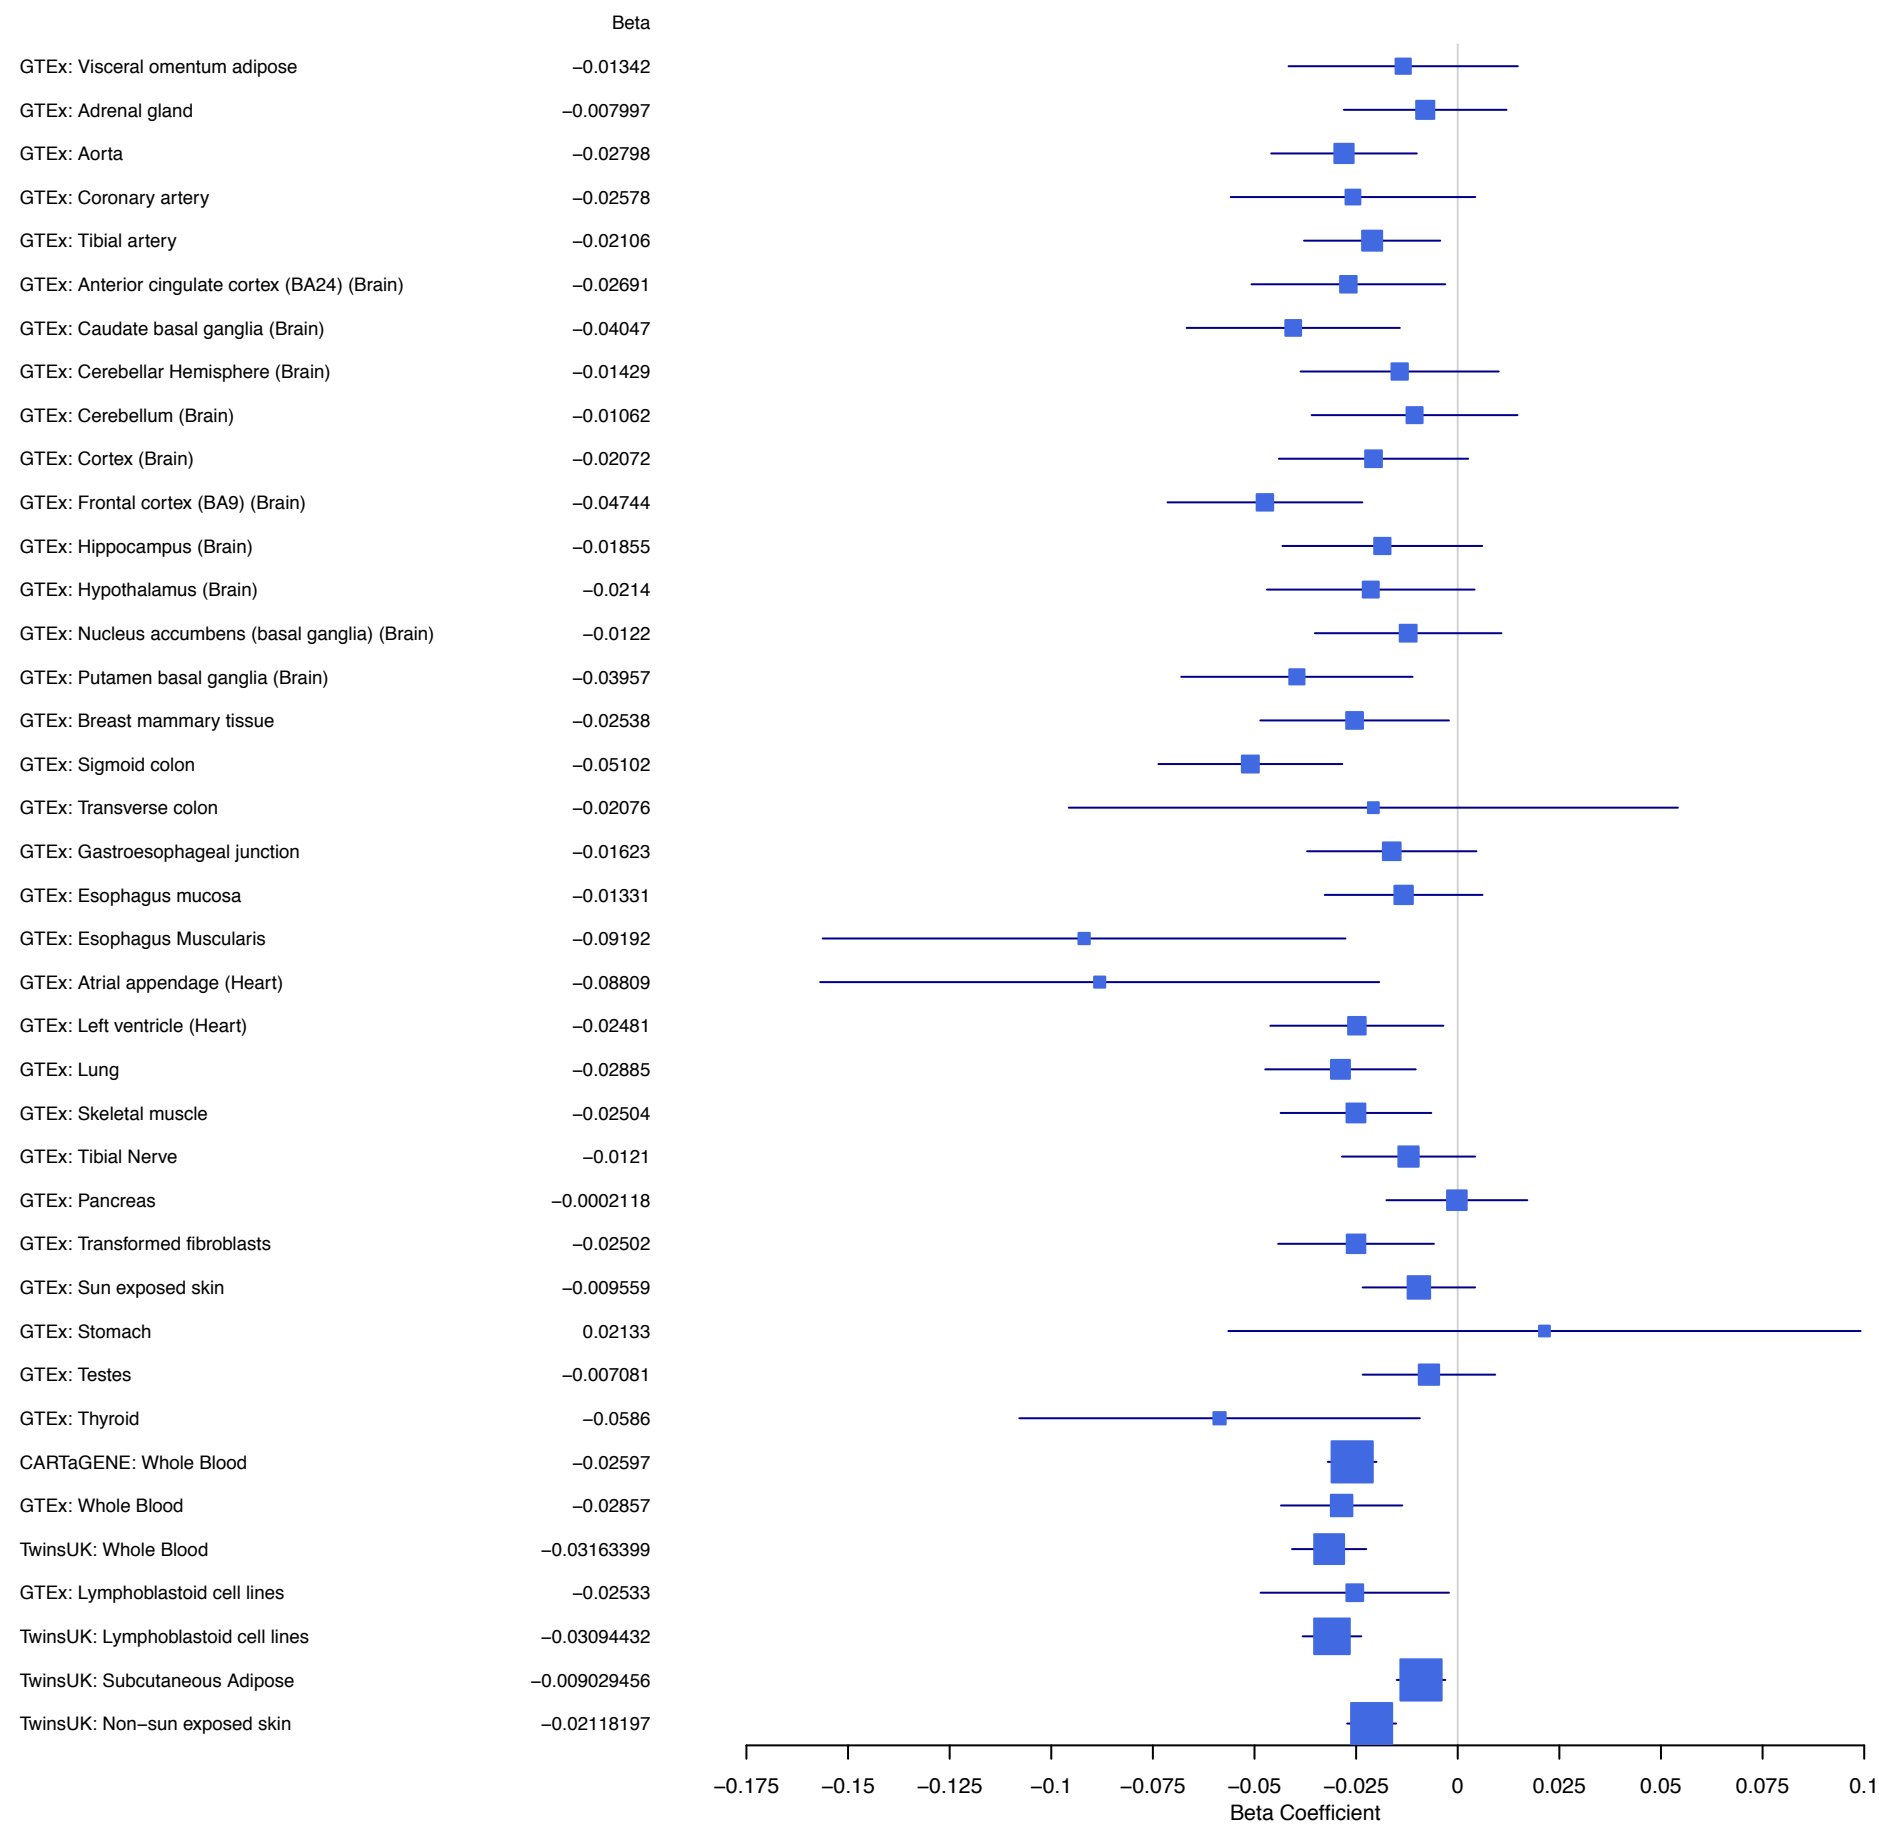

## rs2304694 : MTCO3

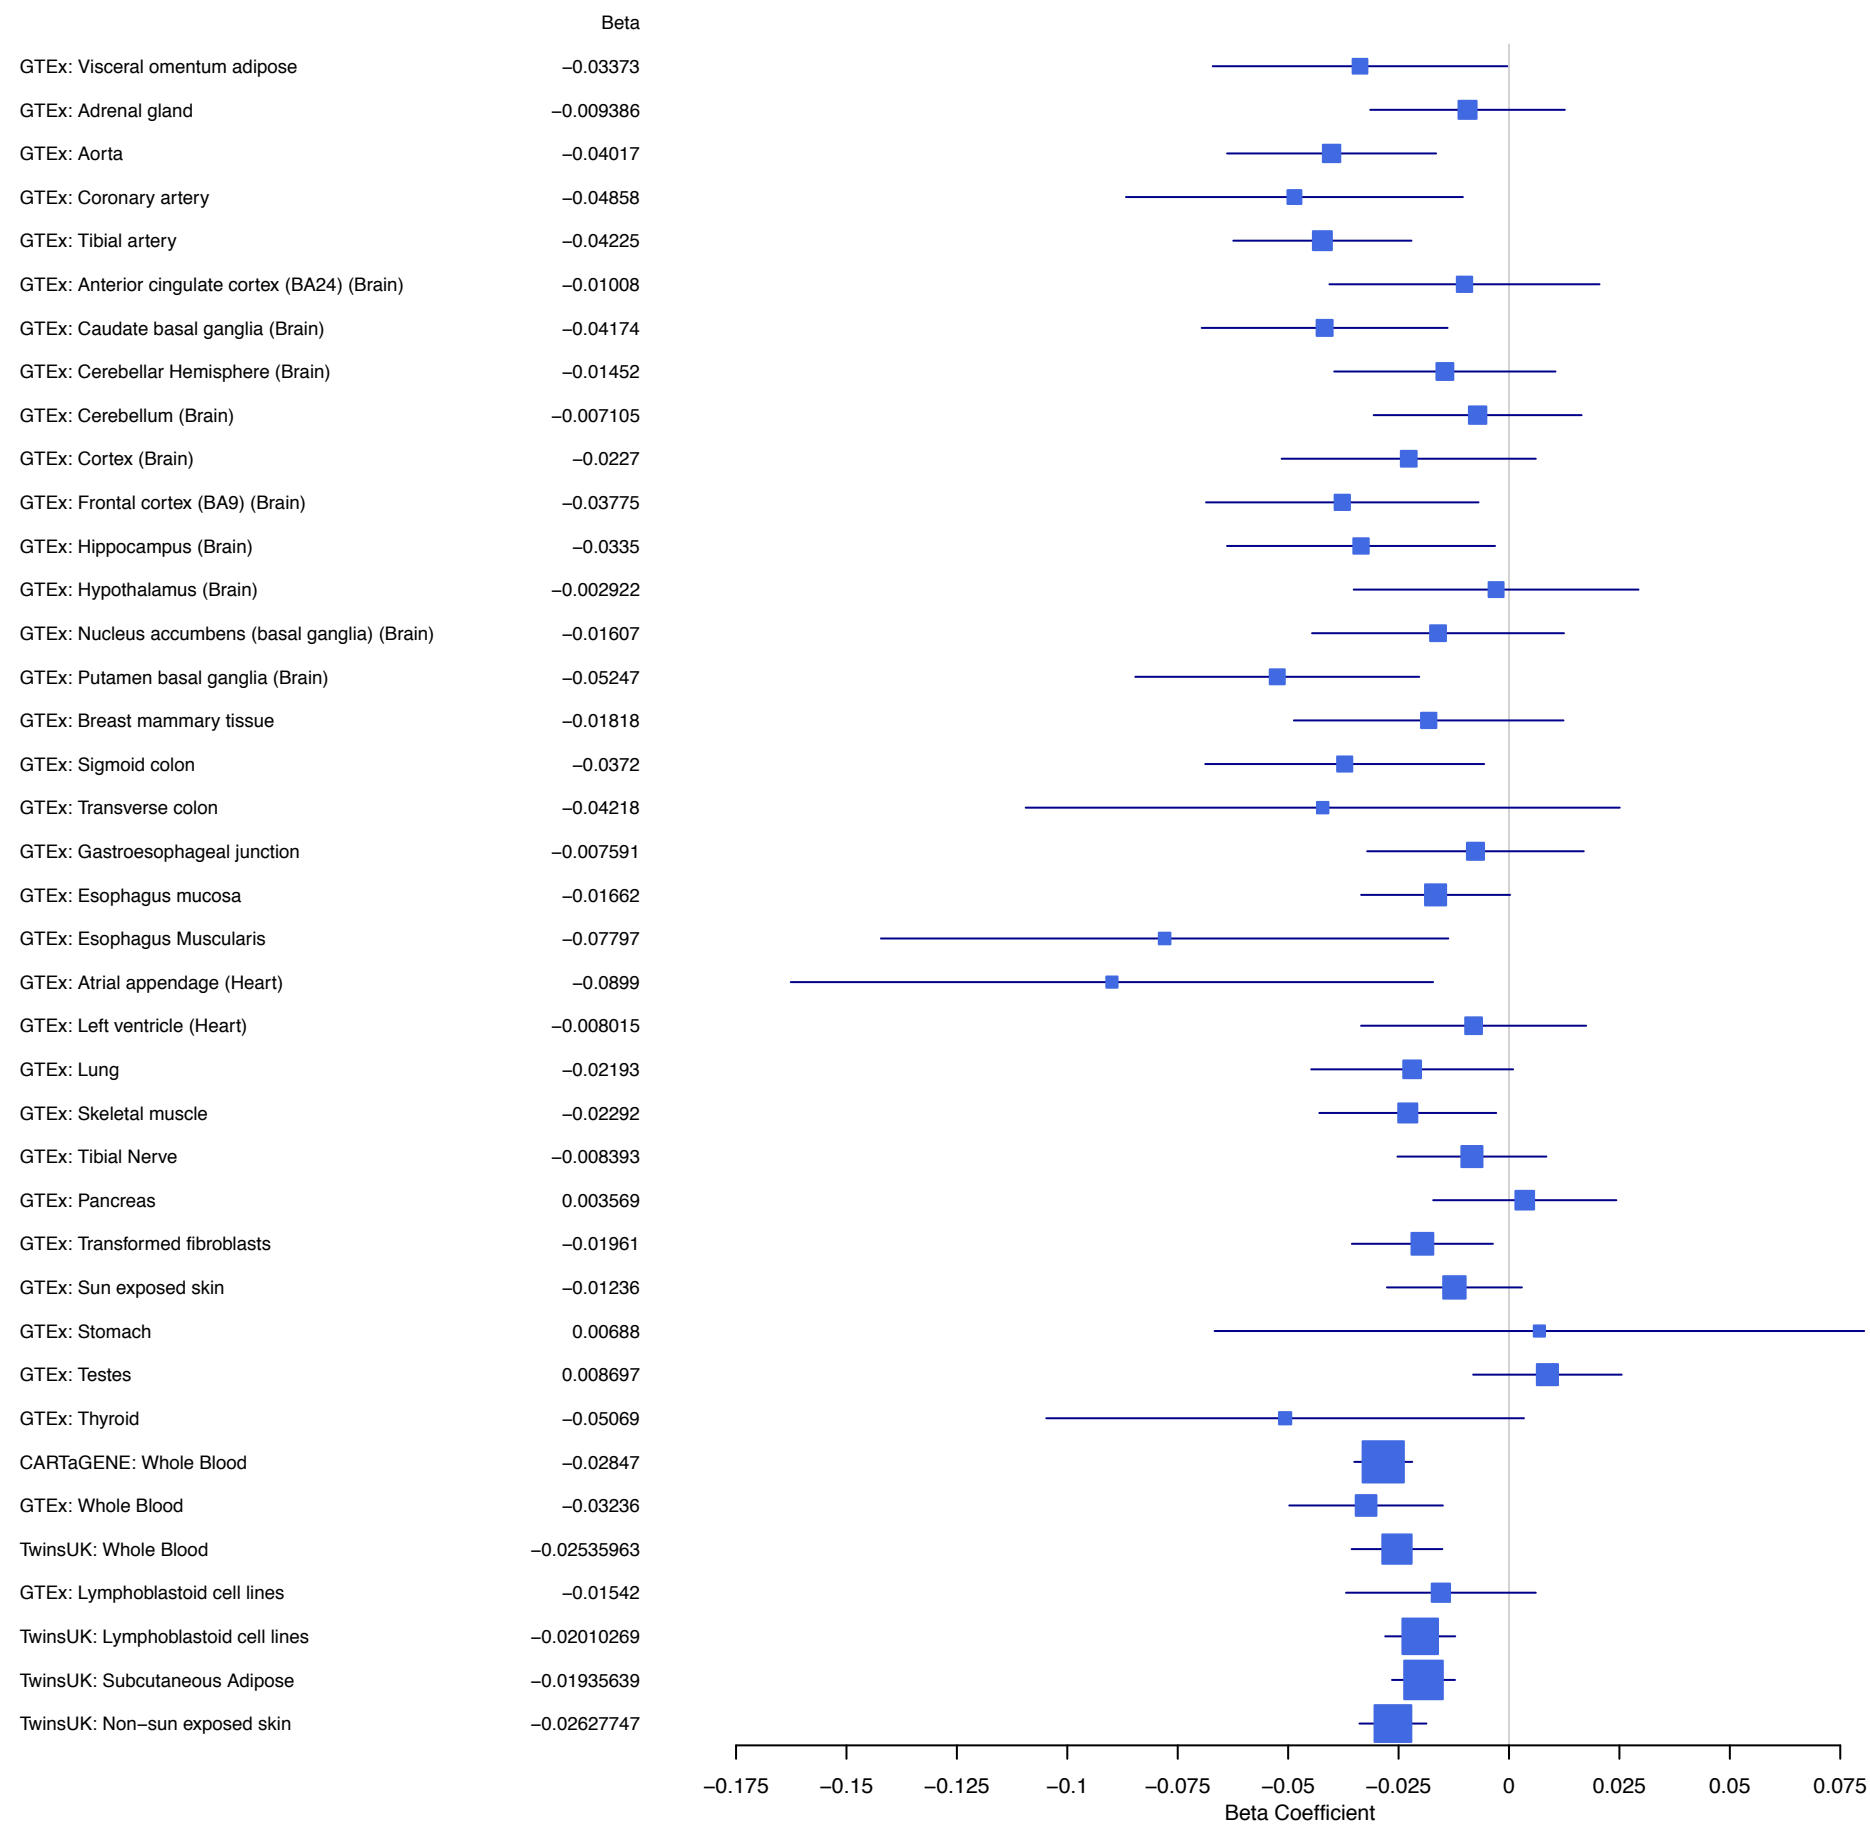

## rs2304694 : MTND1

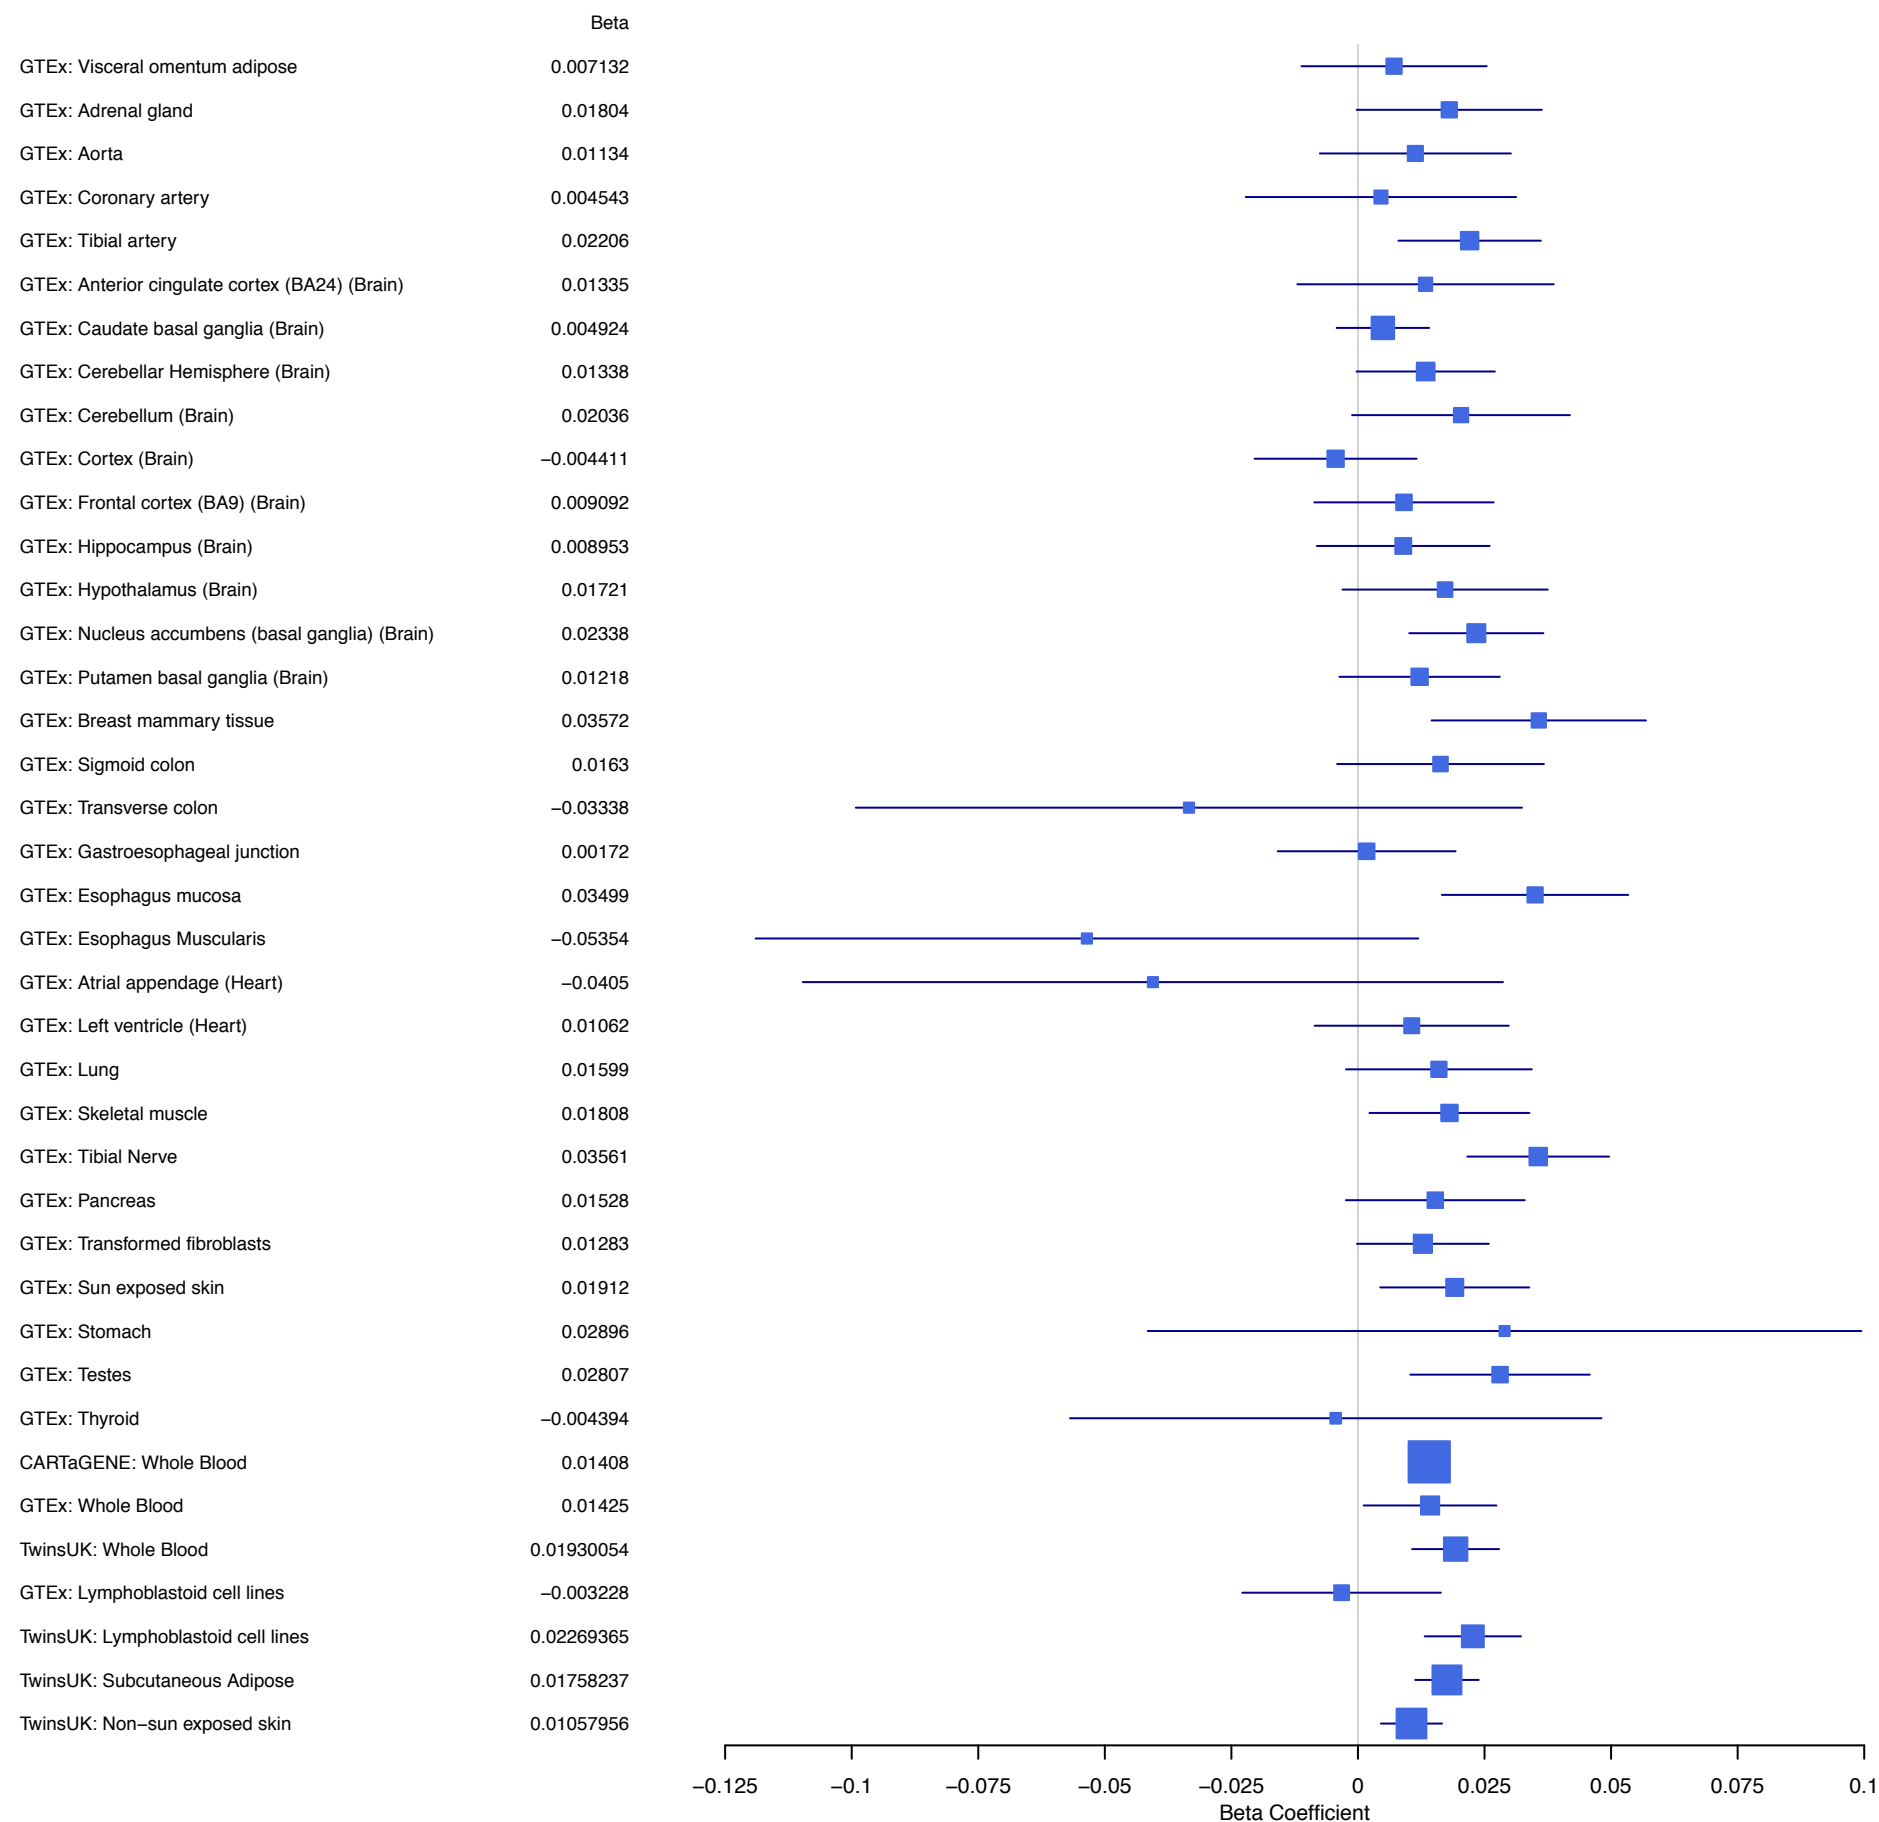

## rs2304694 : MTND4

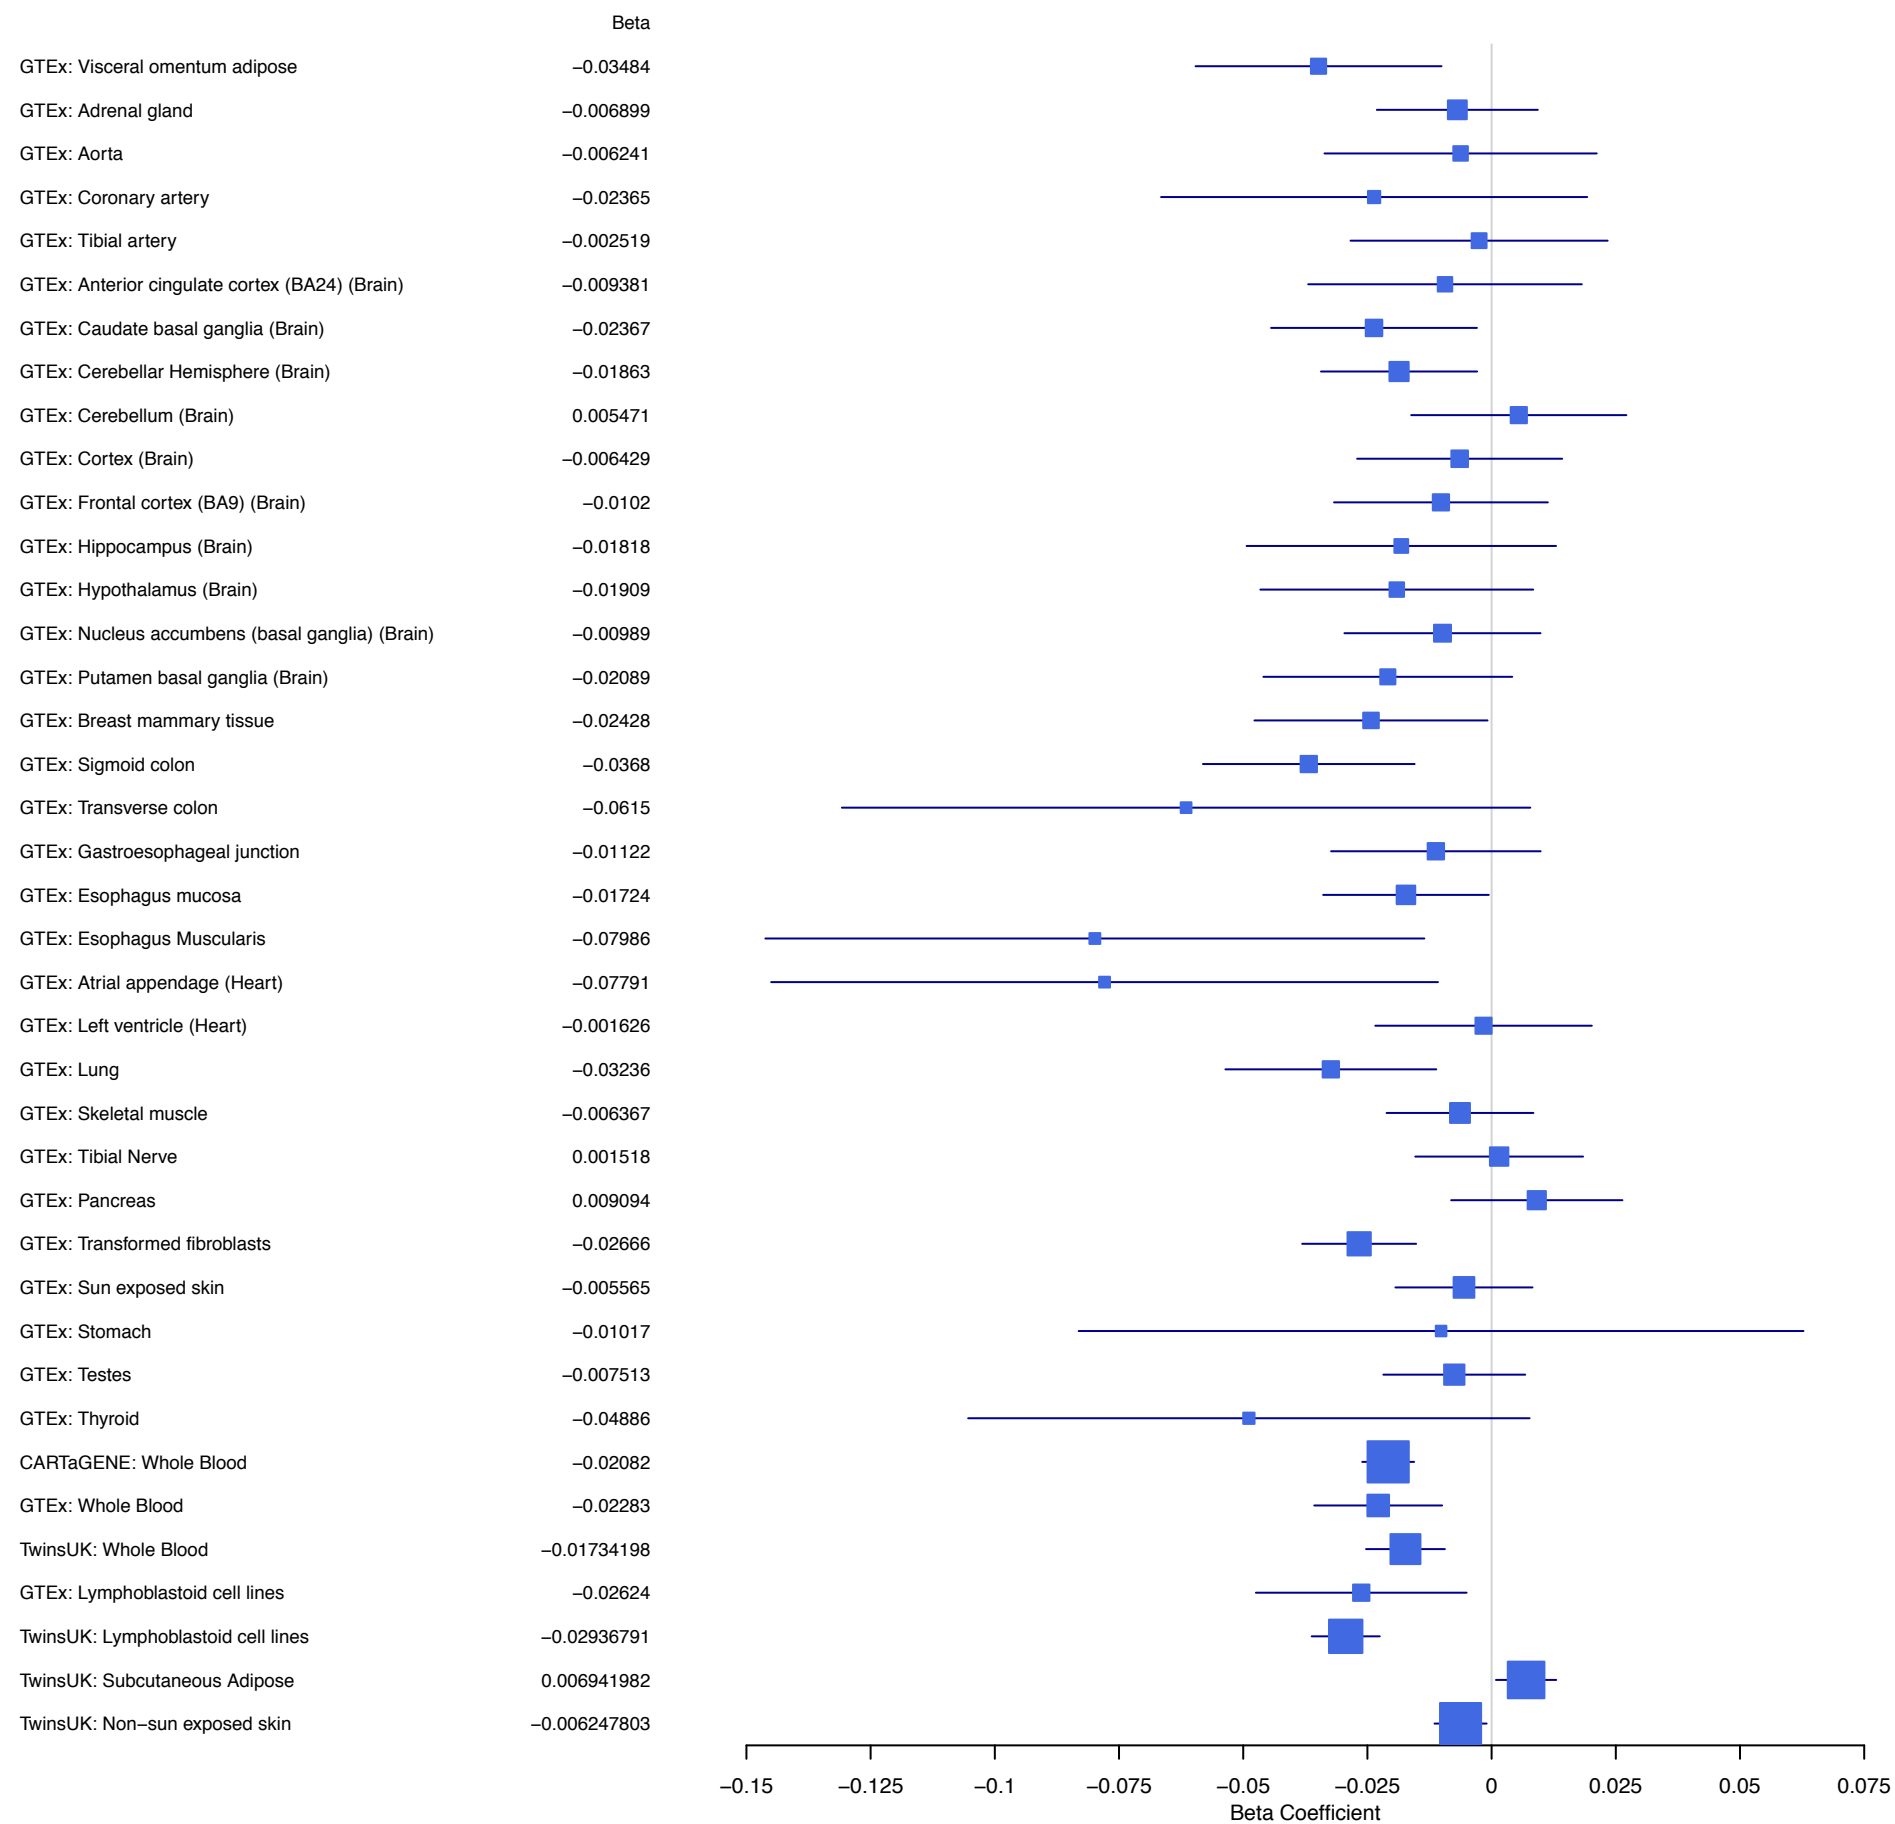

## rs2304694 : MTND4L

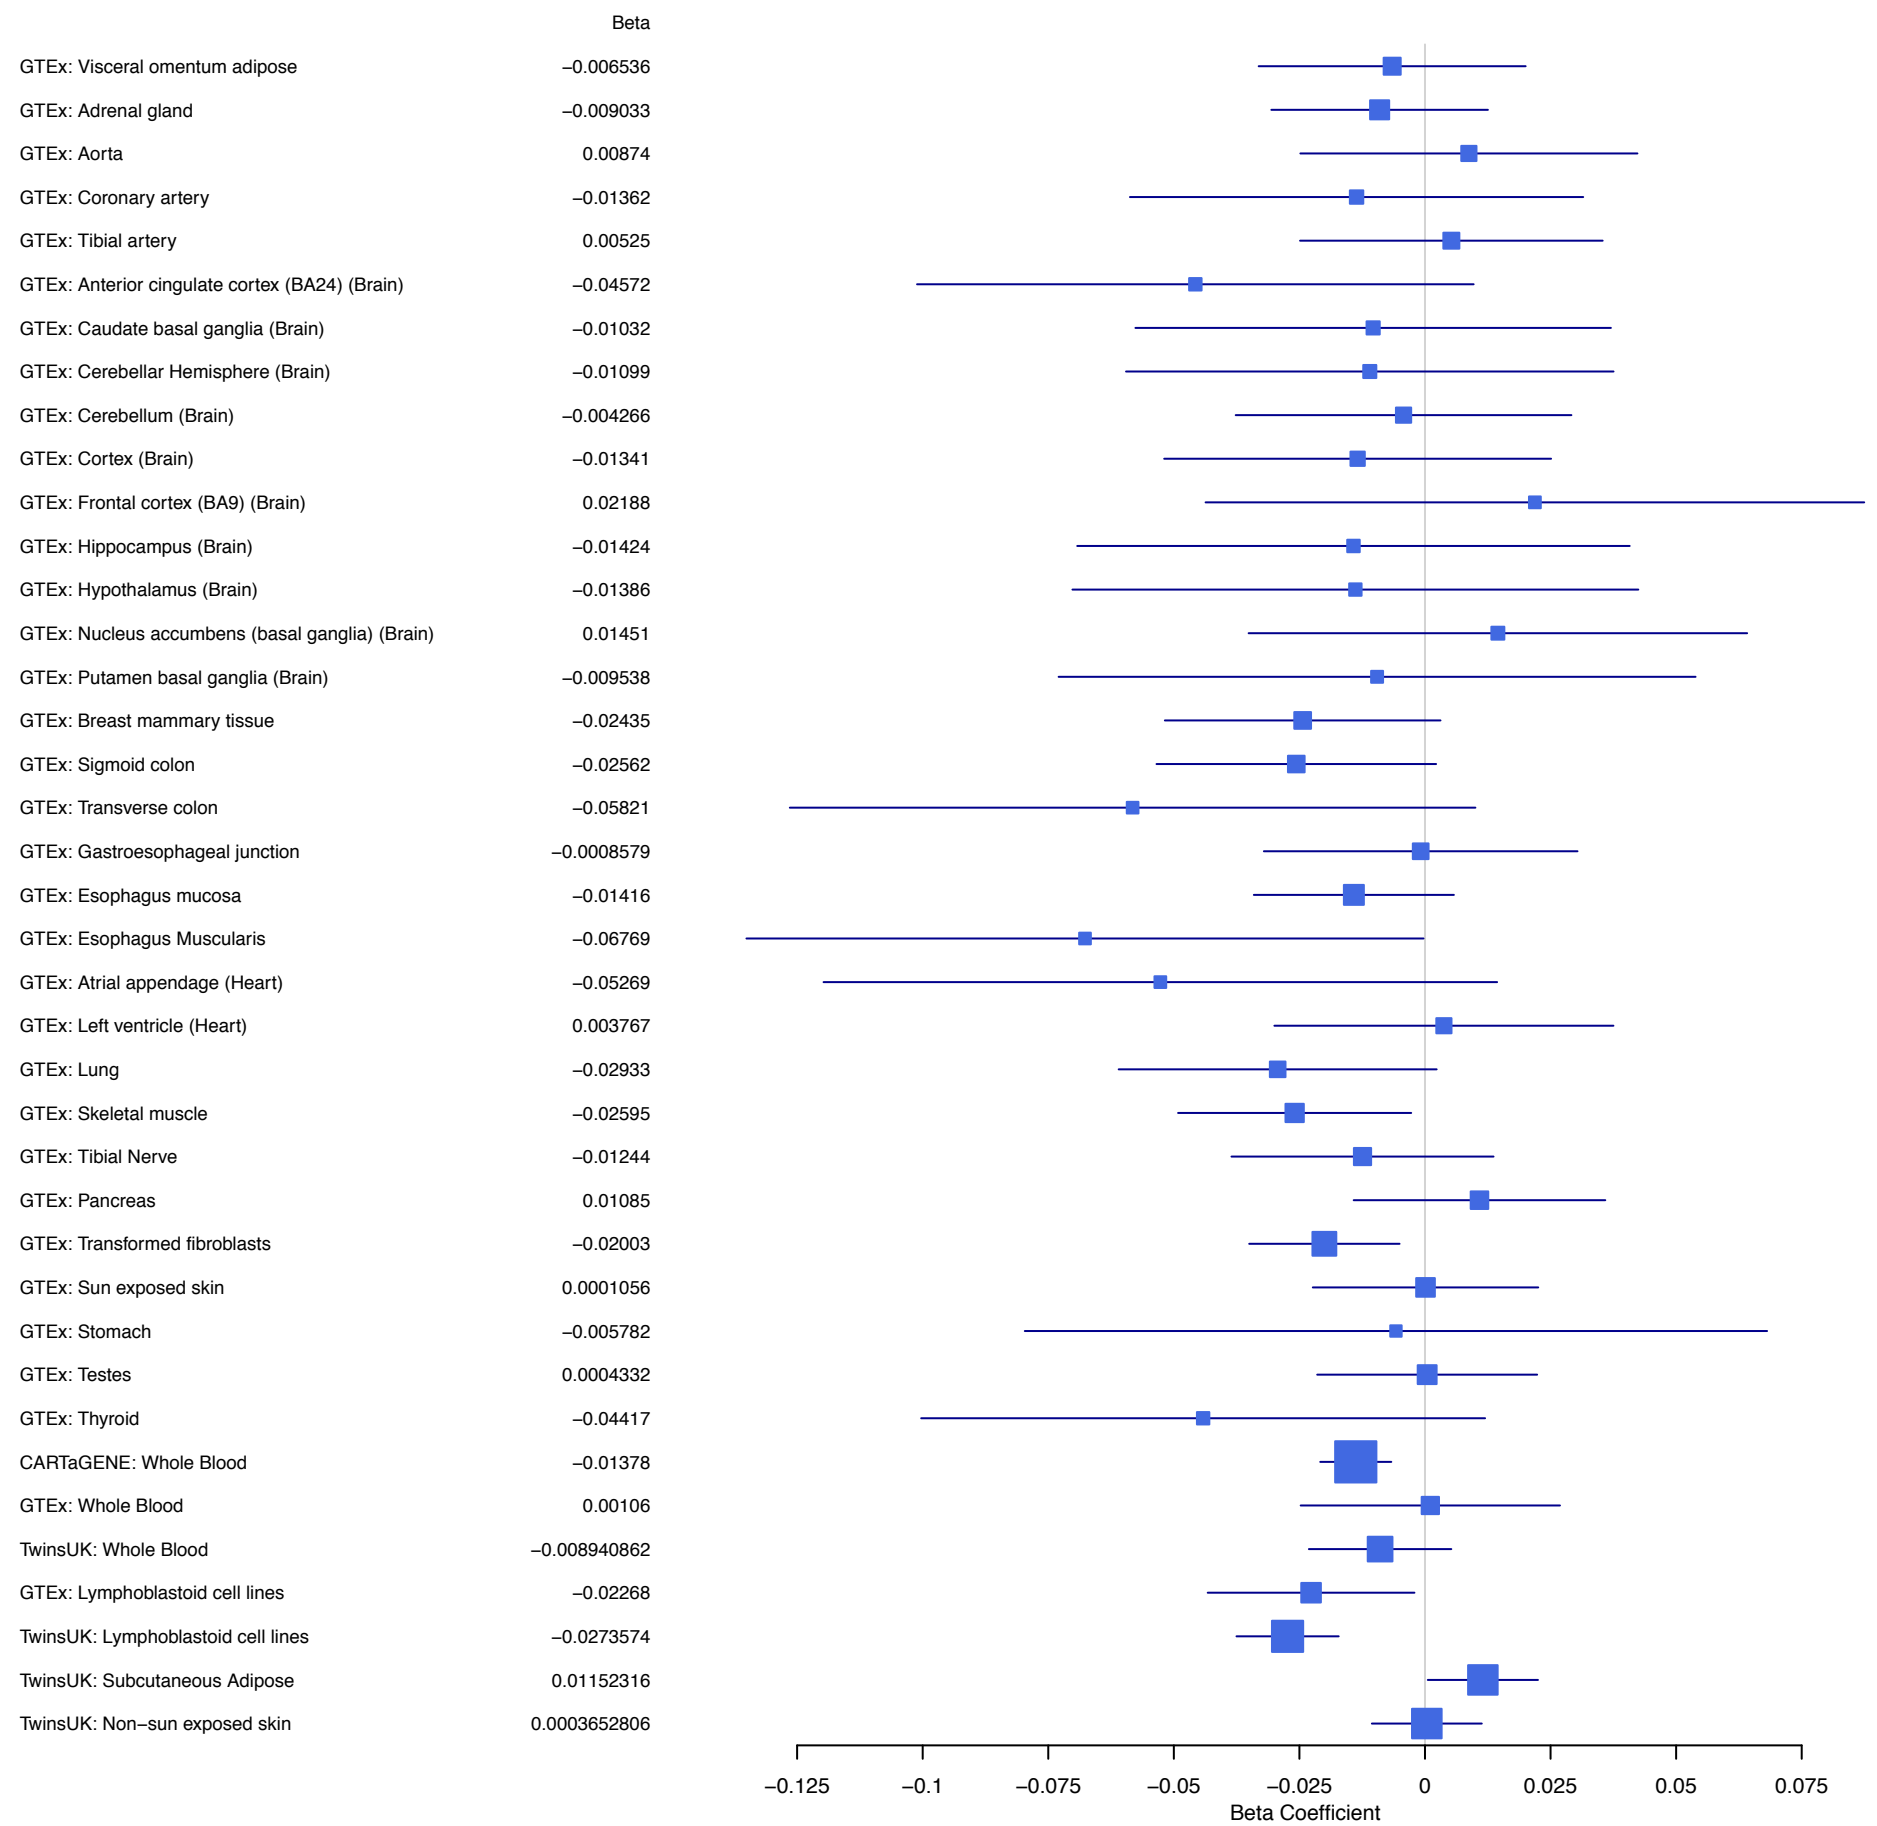

## rs2304694 : MTND5

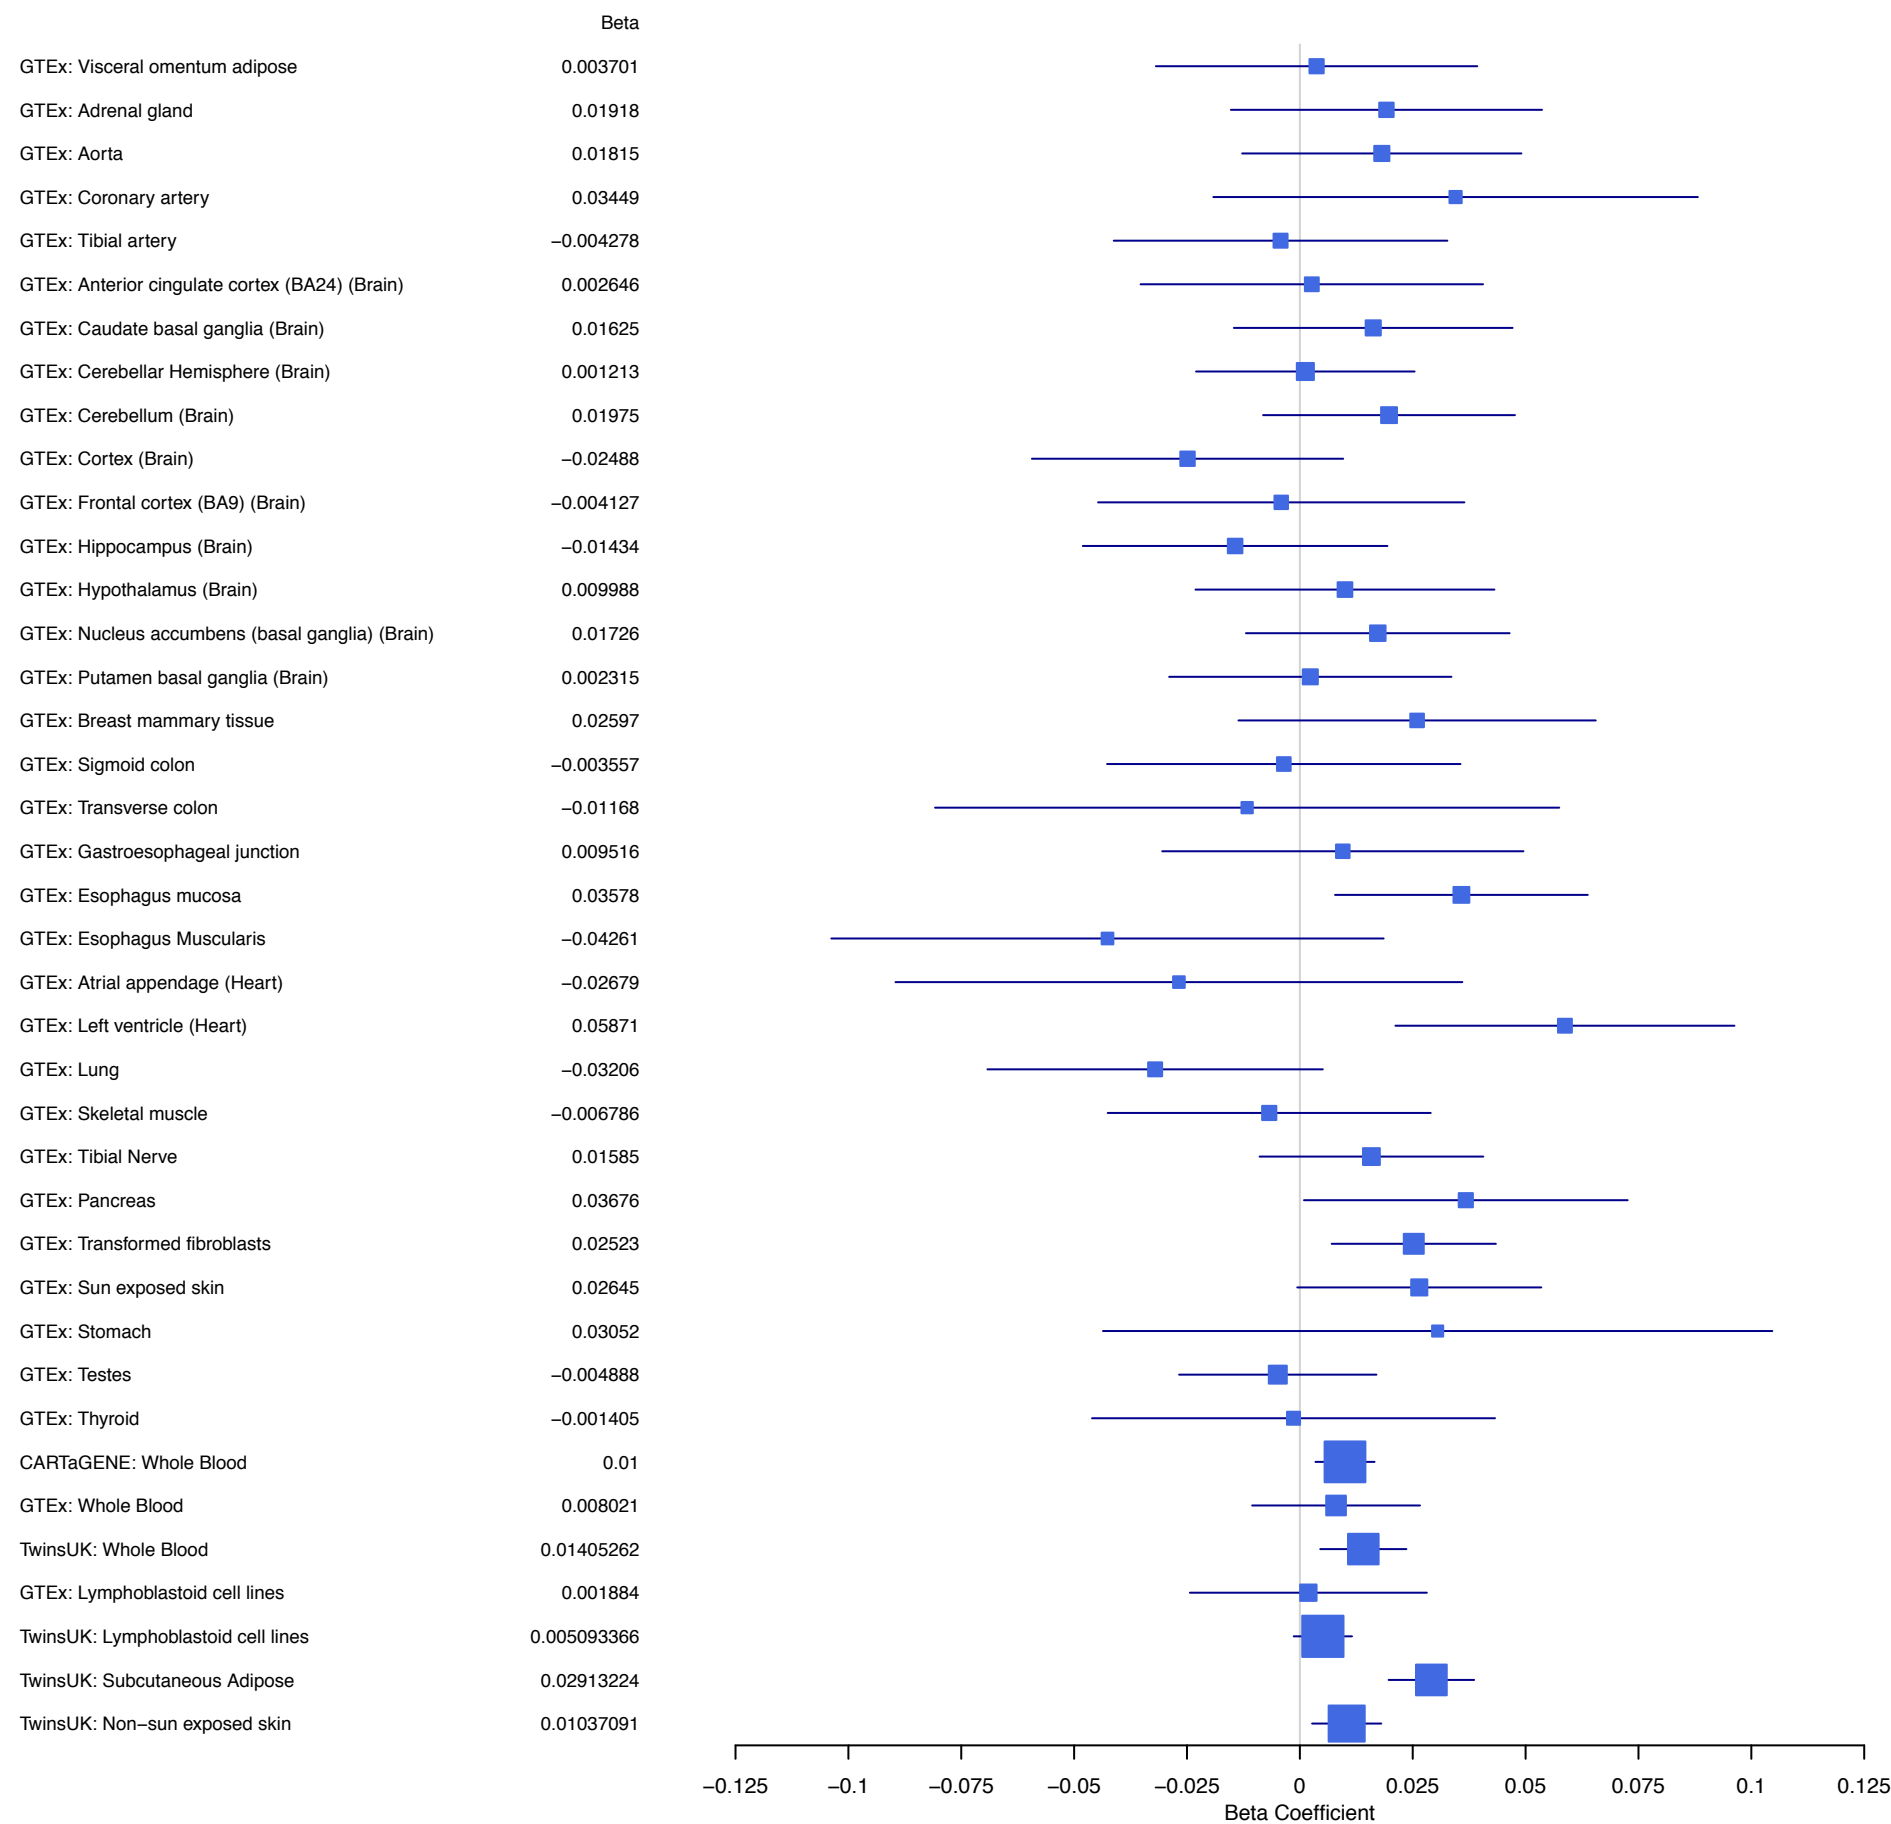

## rs2304694 : MTND6

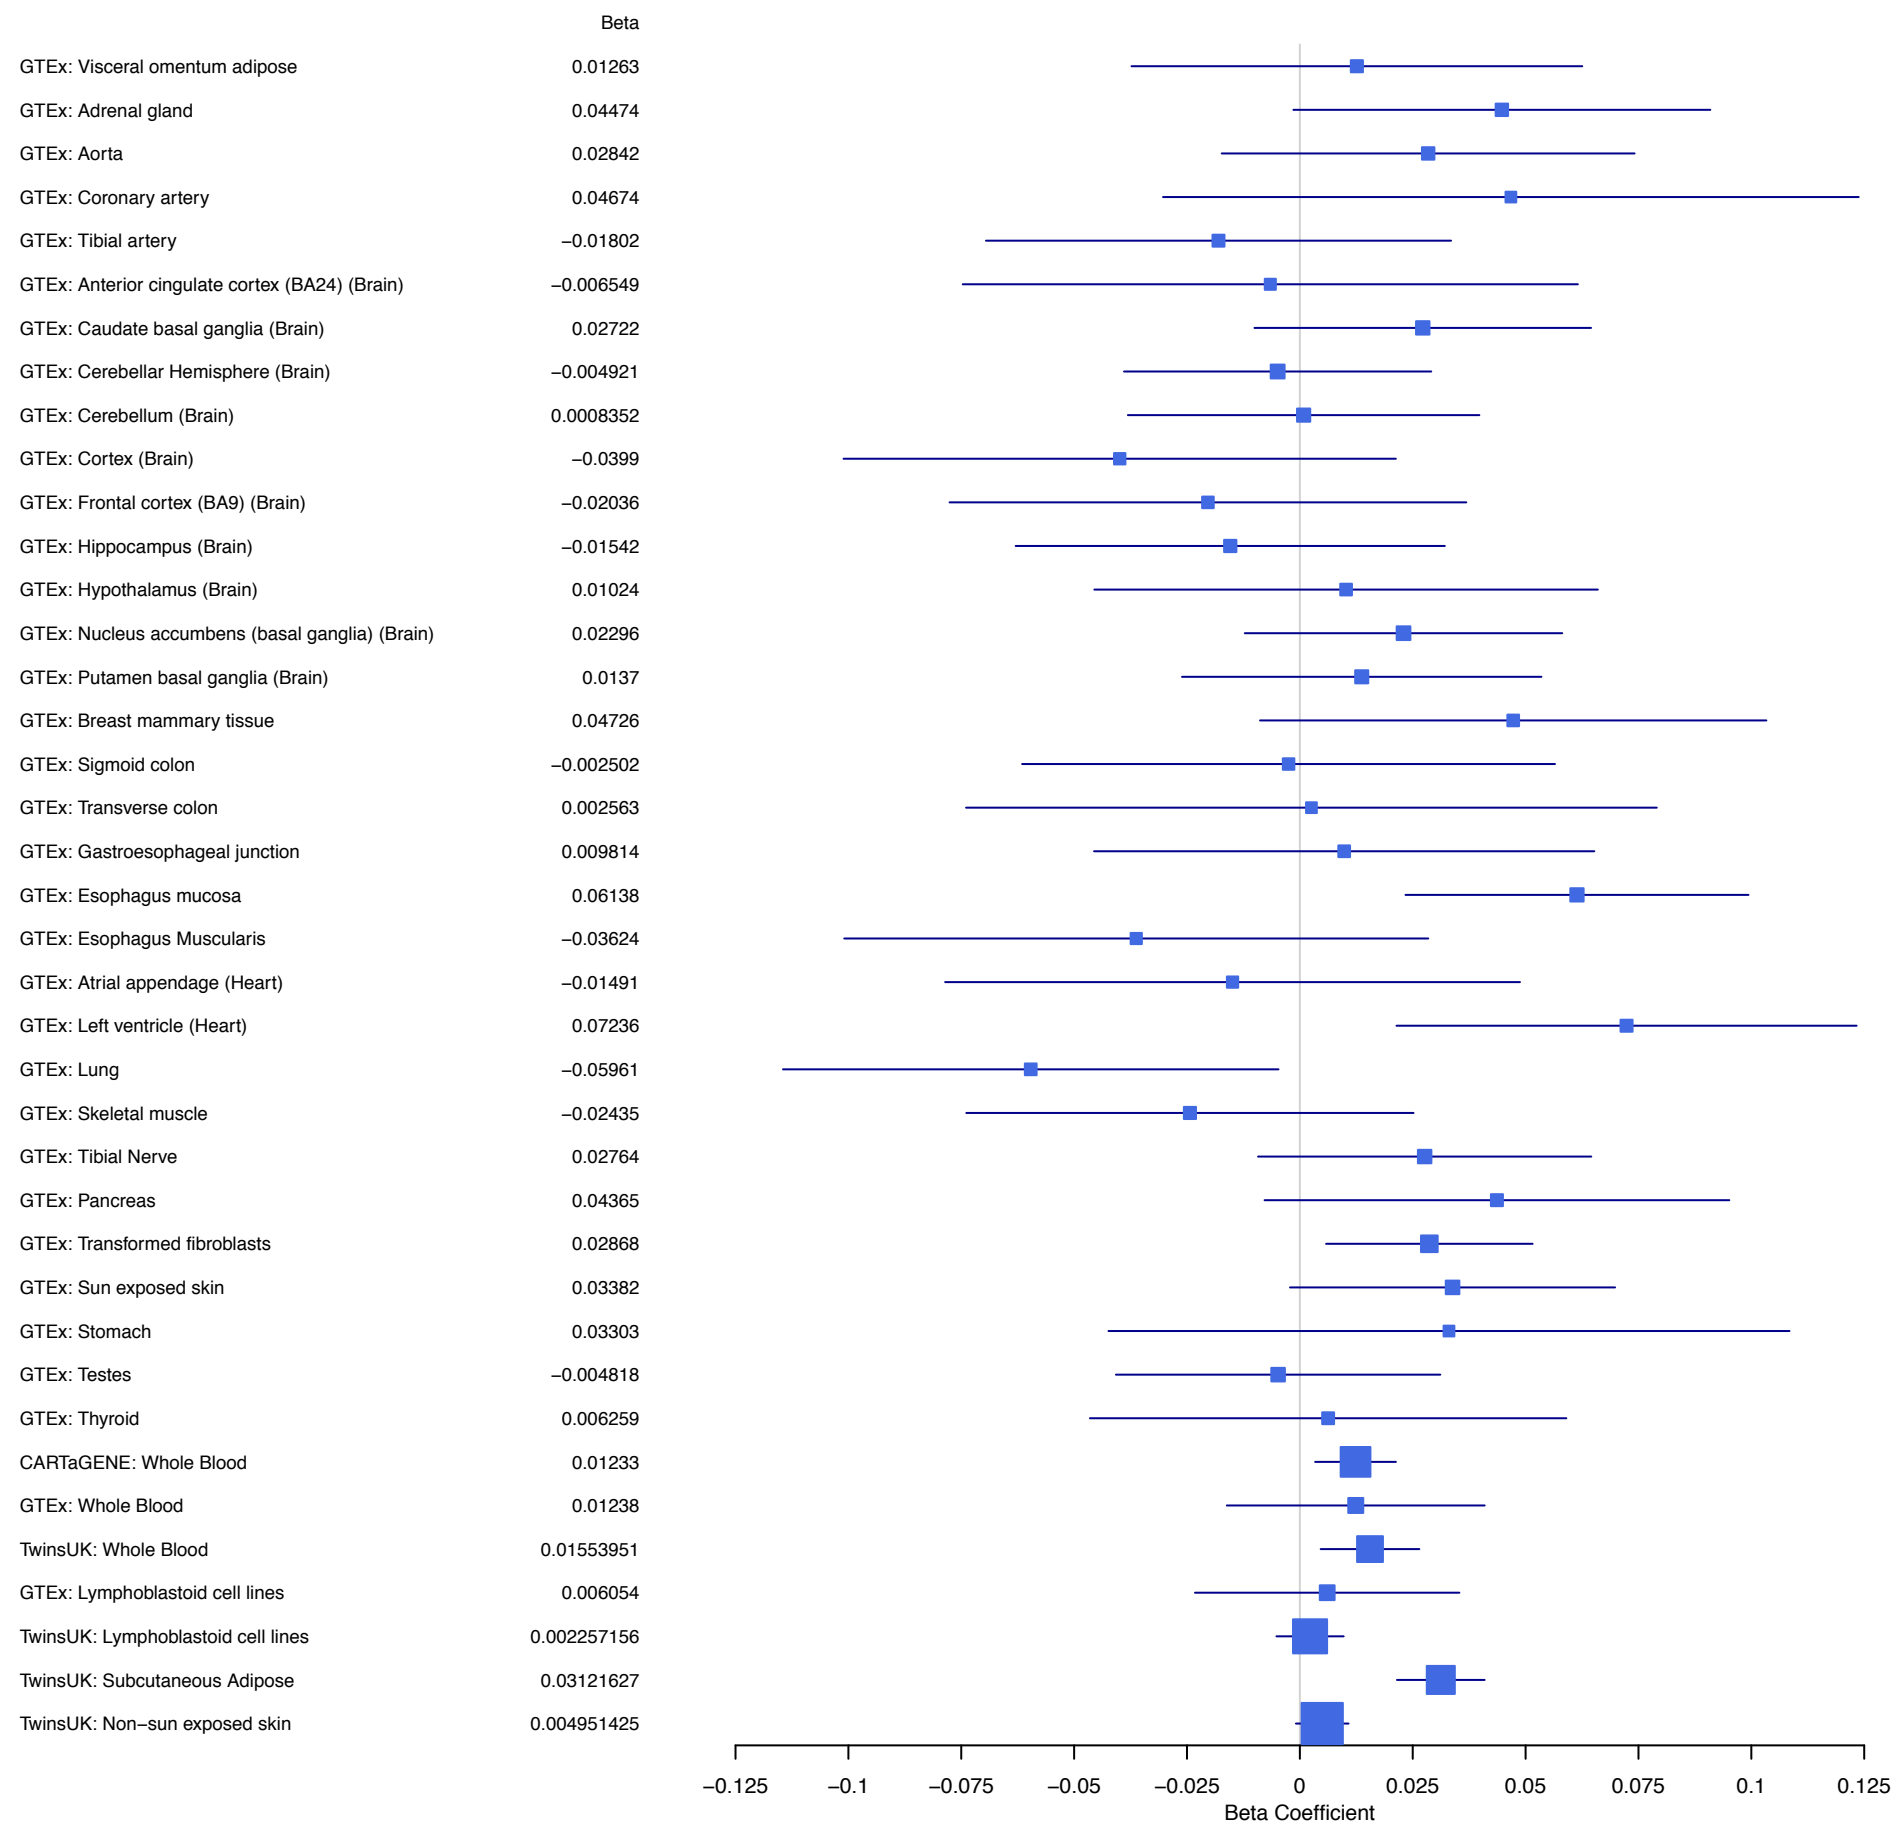

rs2304694 : MTRNR2

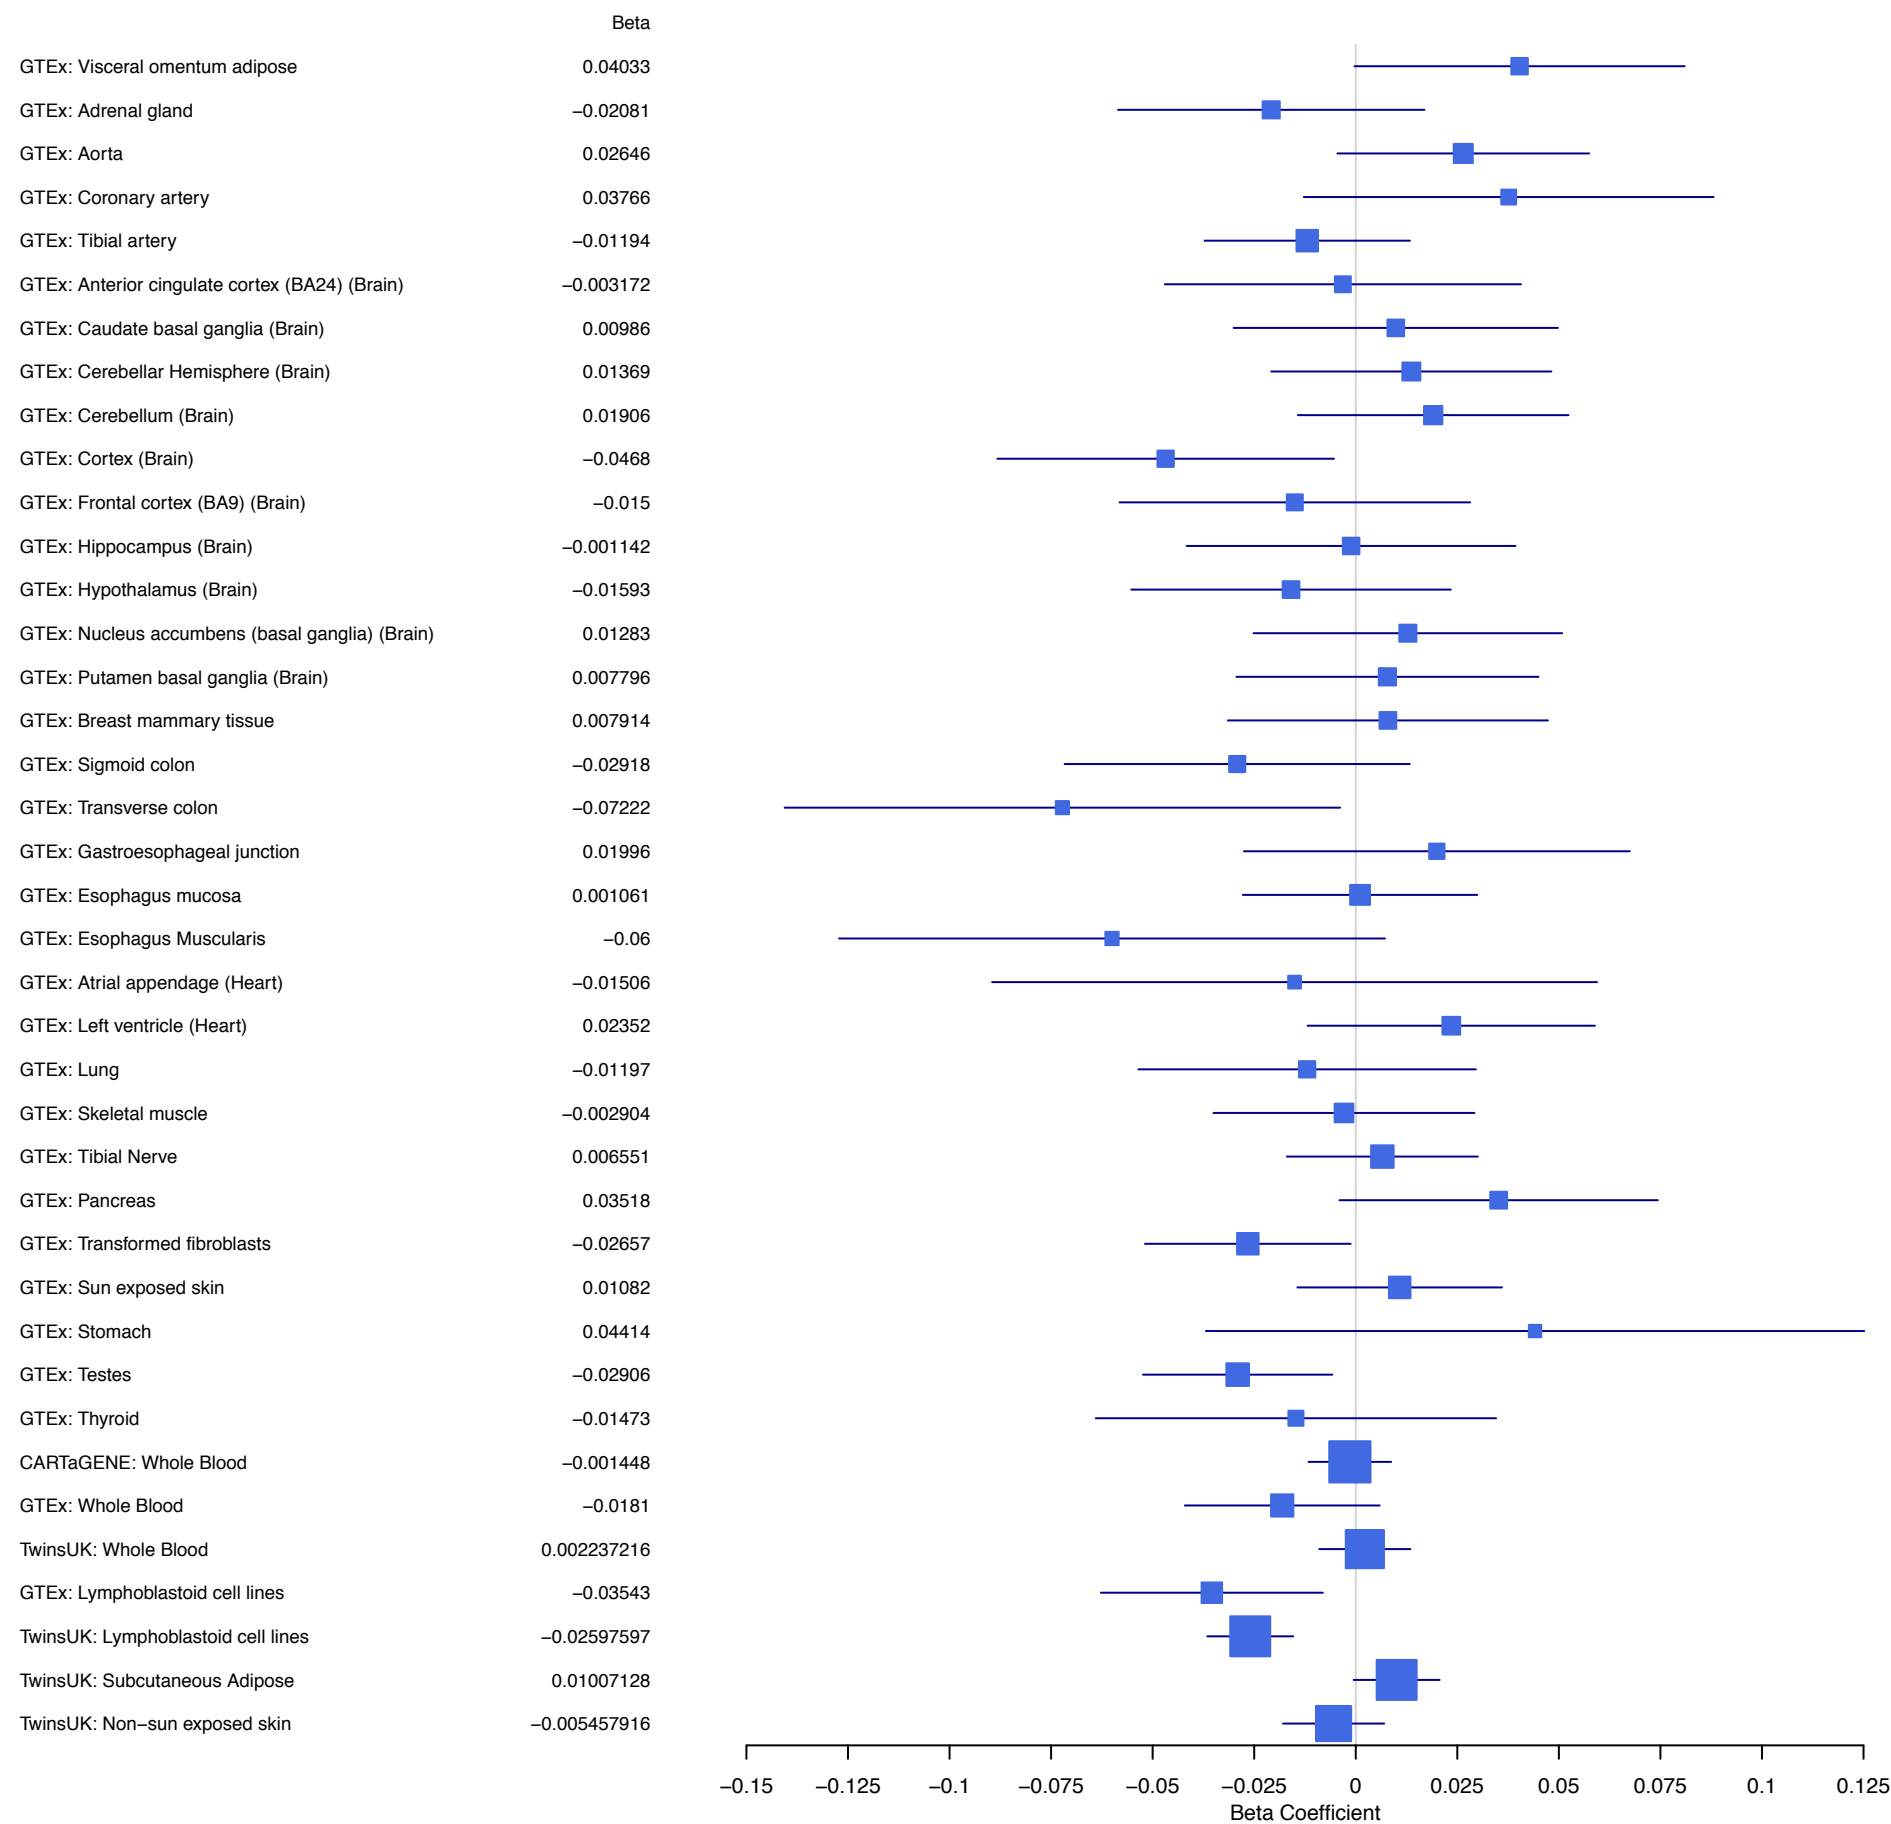

## rs2627775 : MTCO1

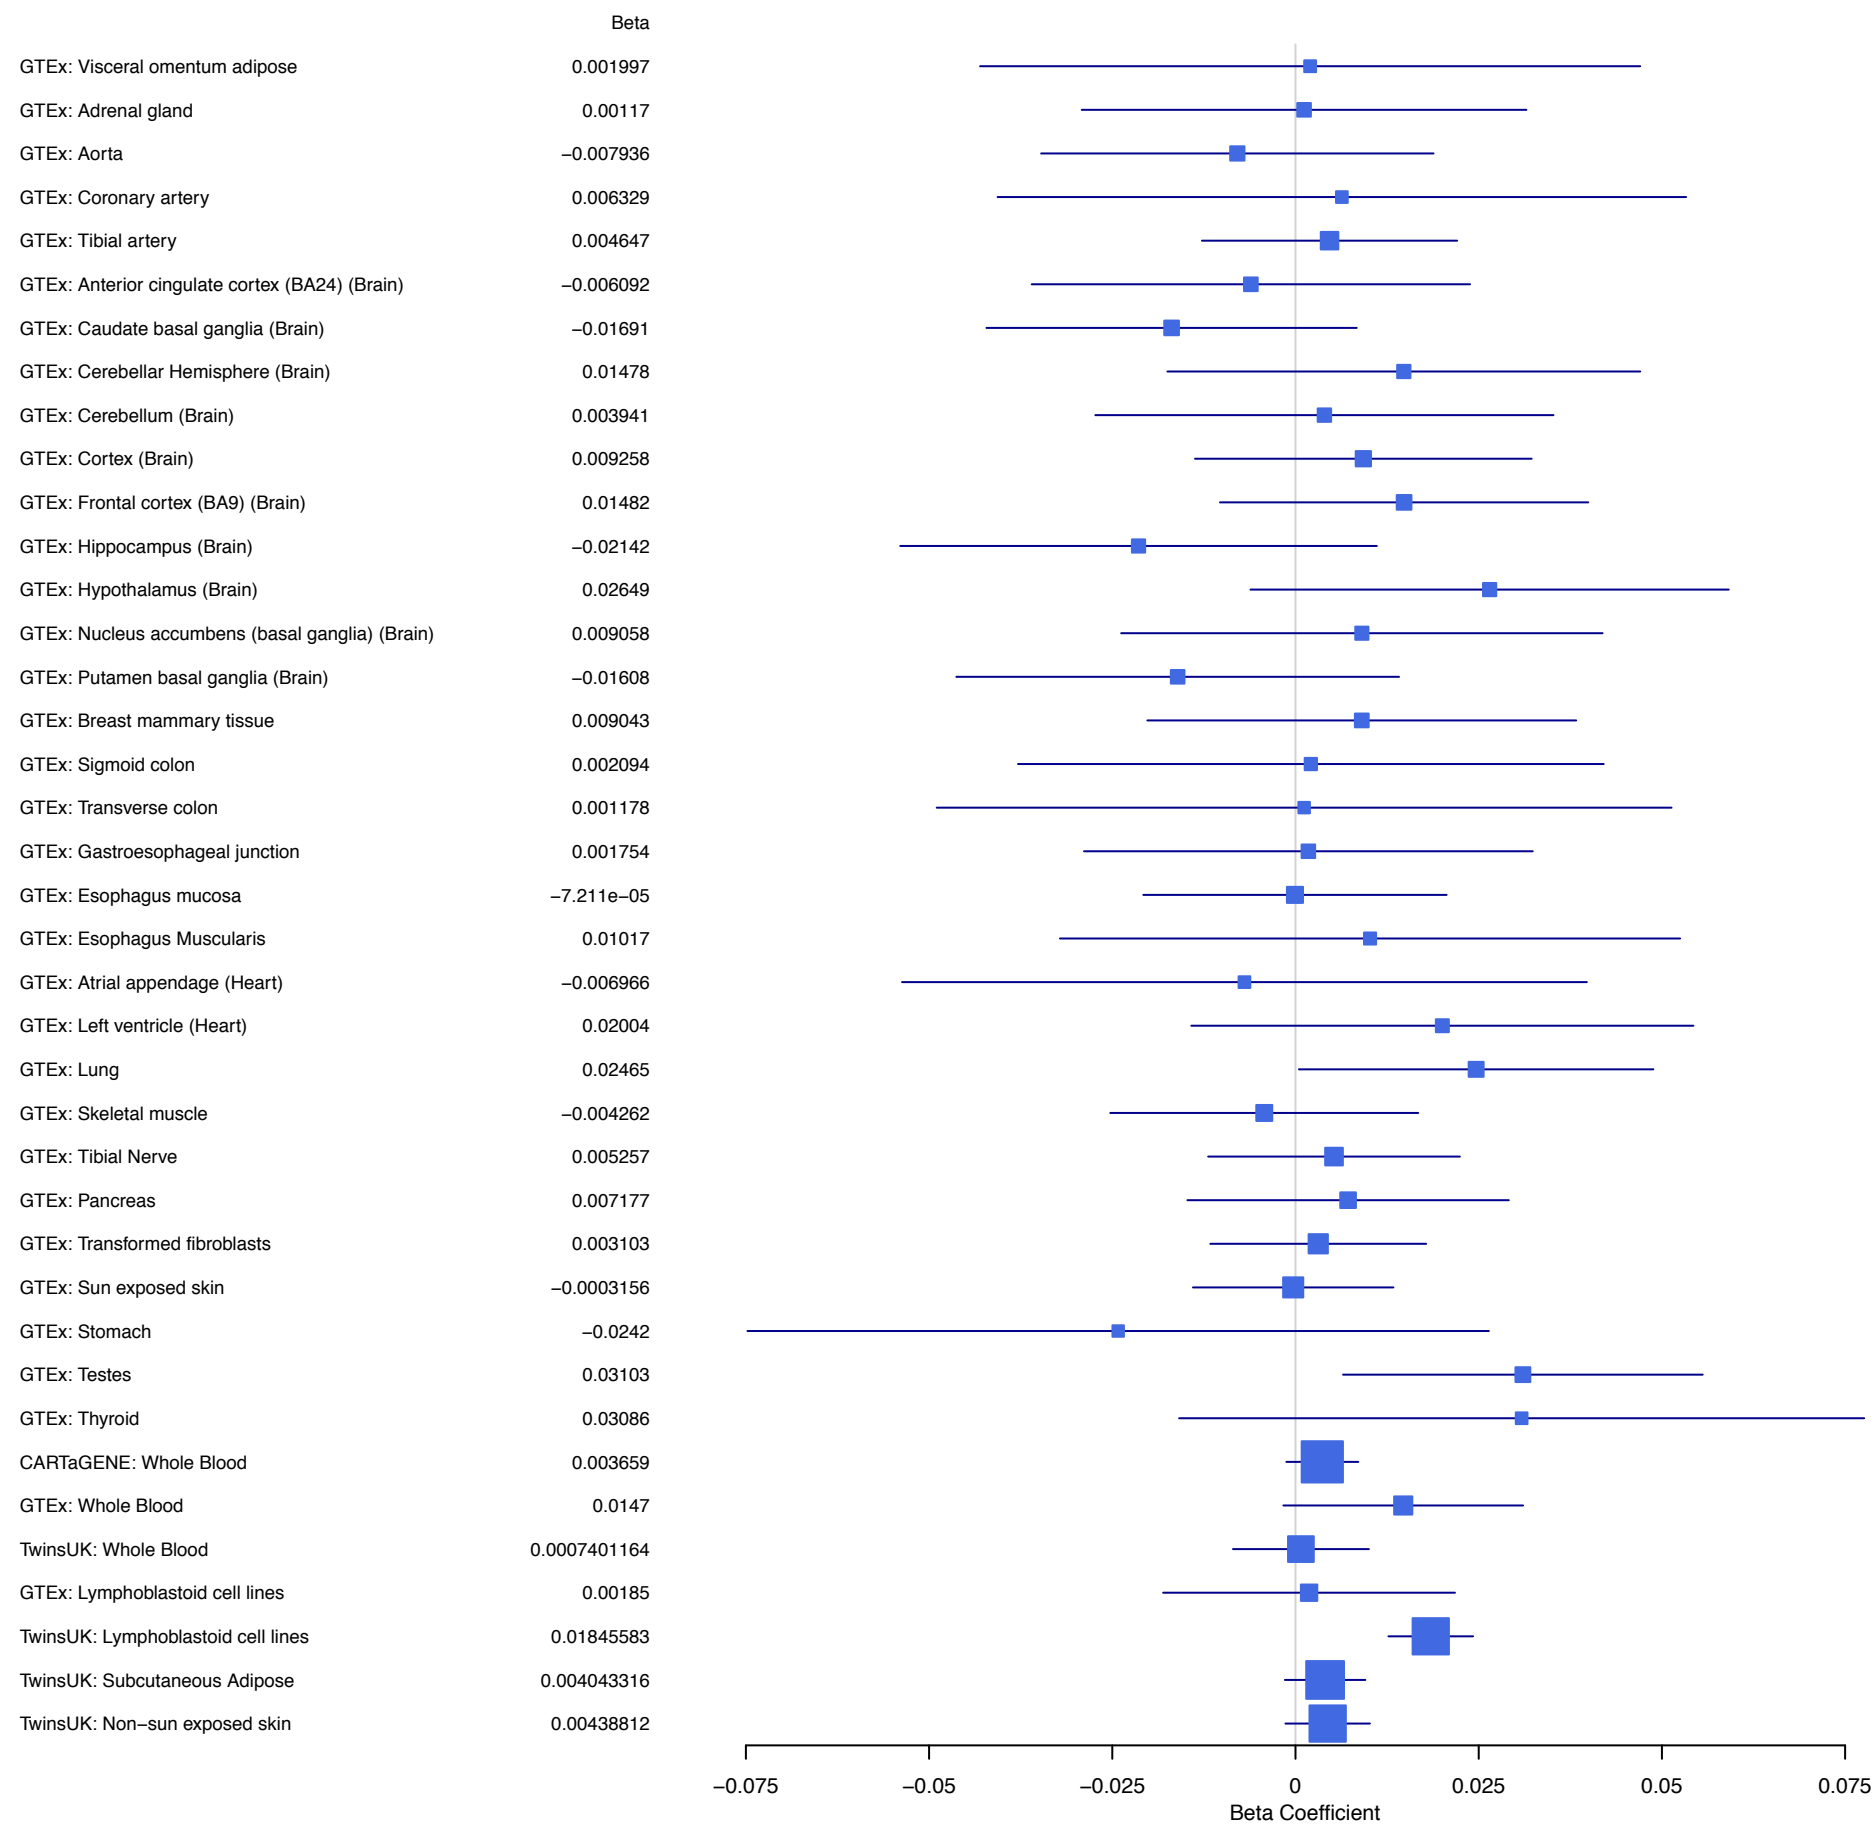

## rs2712498 : MTND3

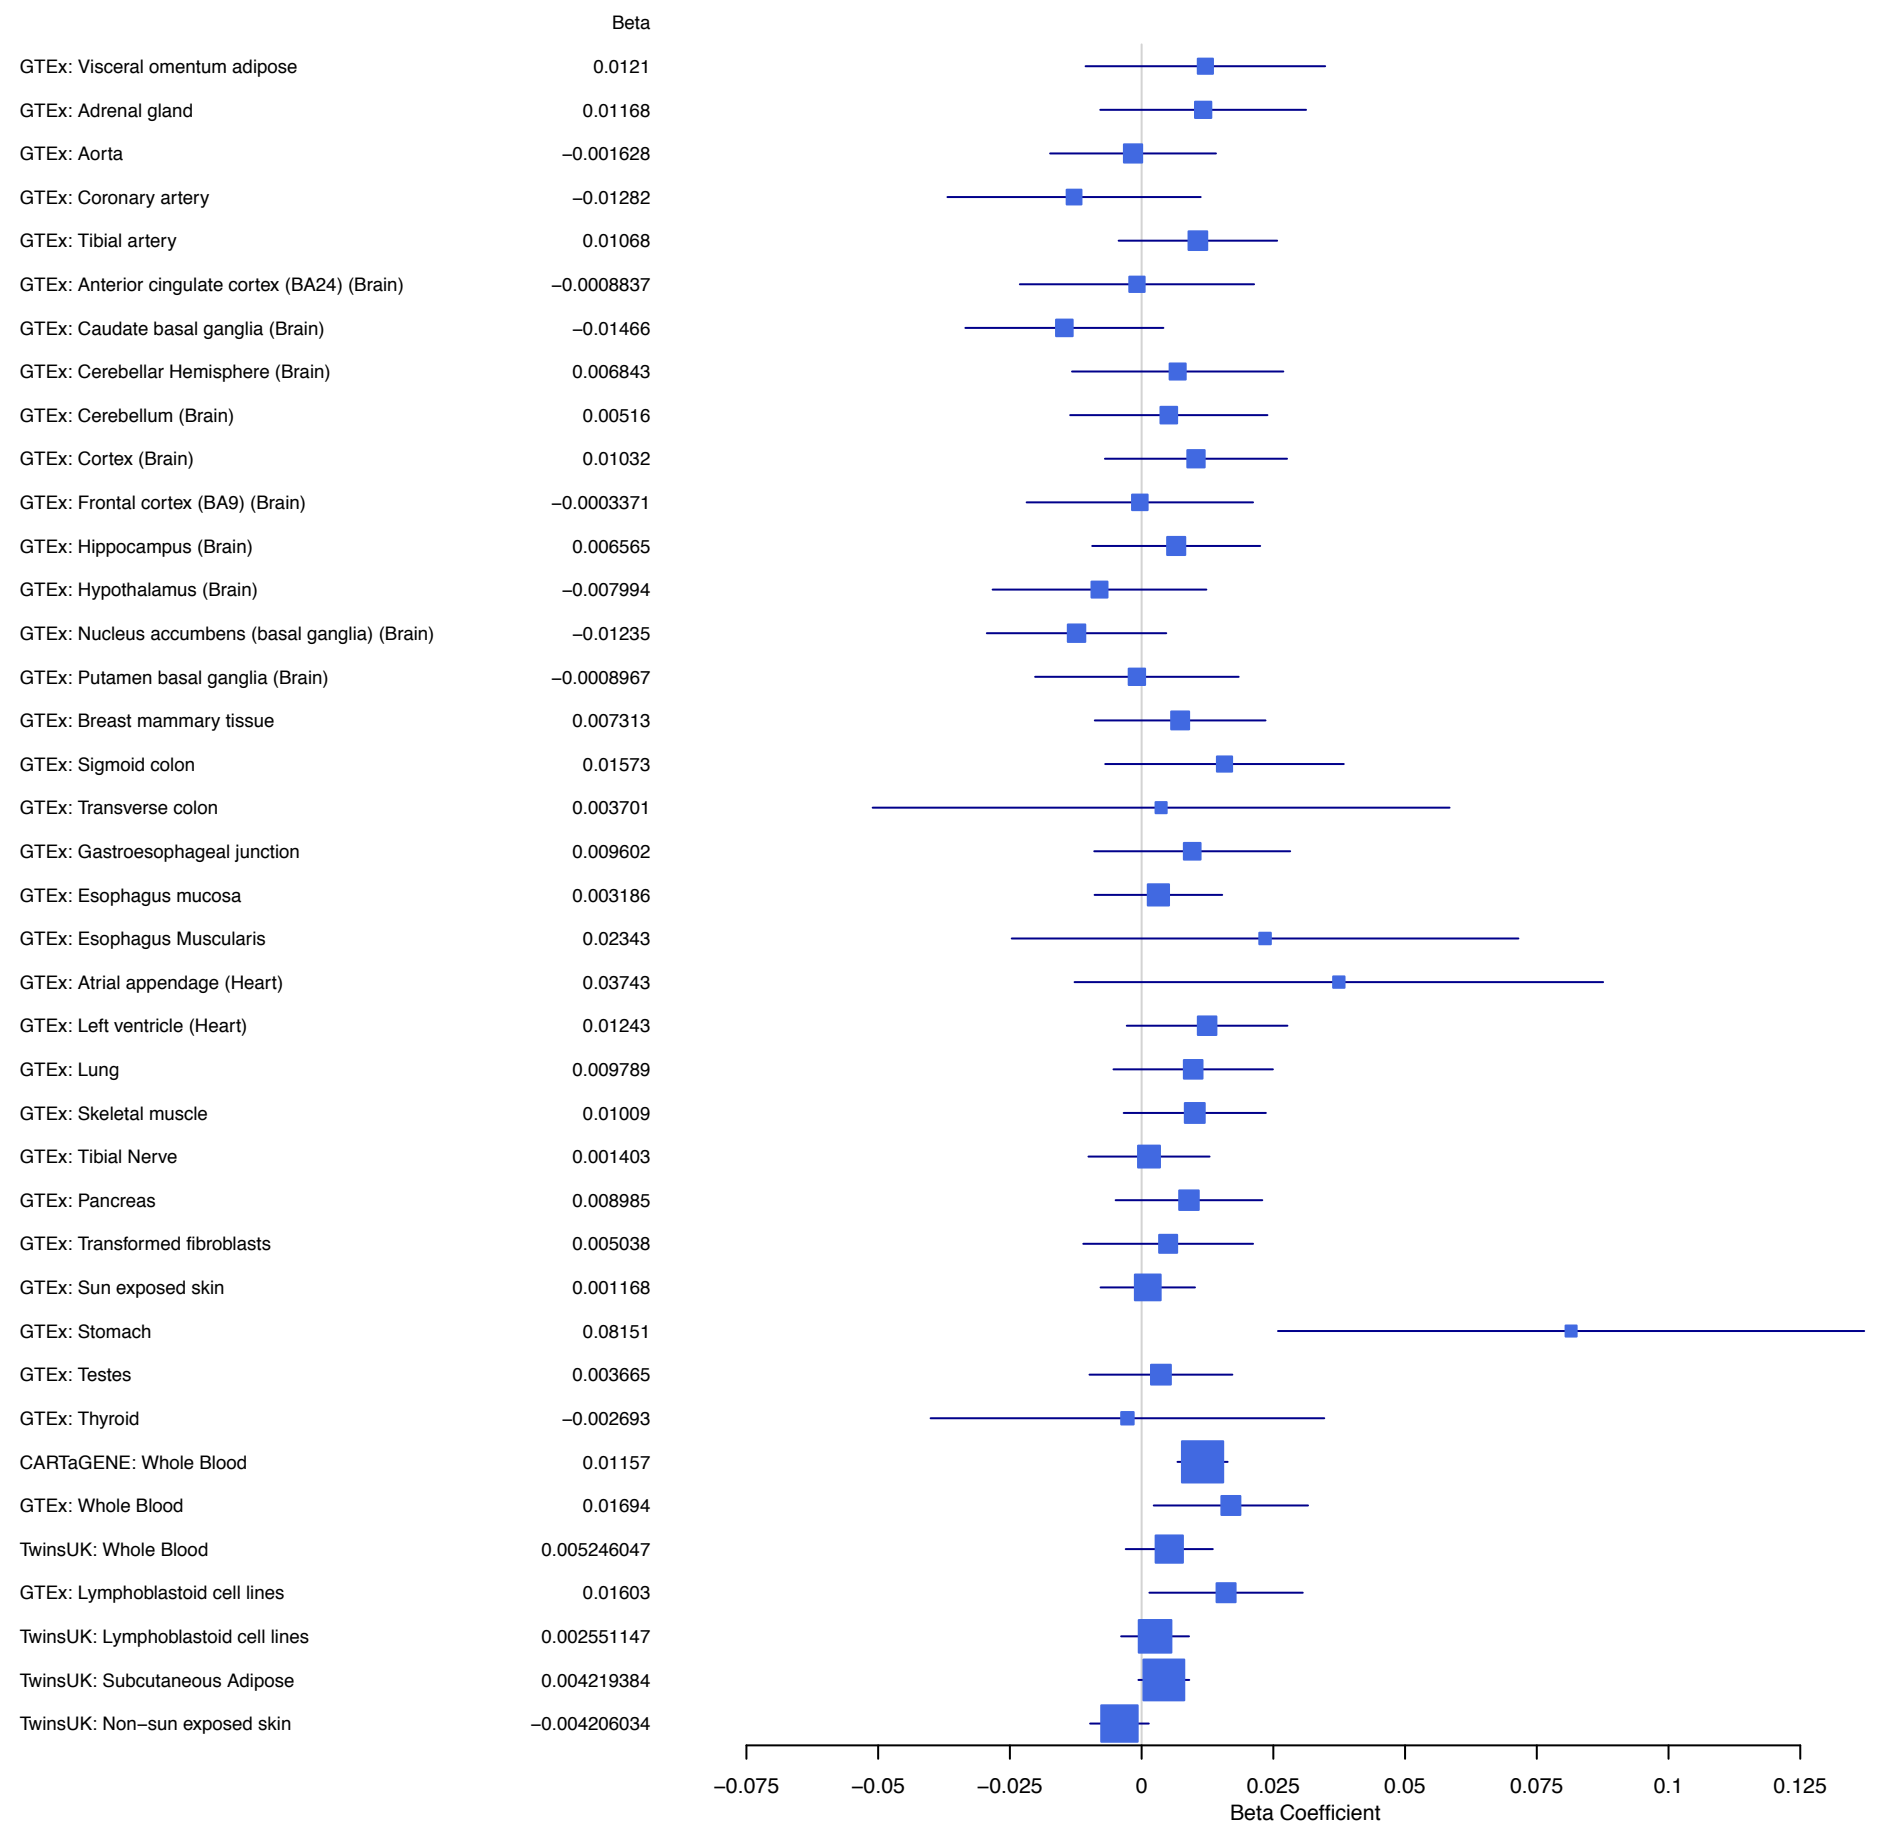

## rs2837565 : MTRNR1

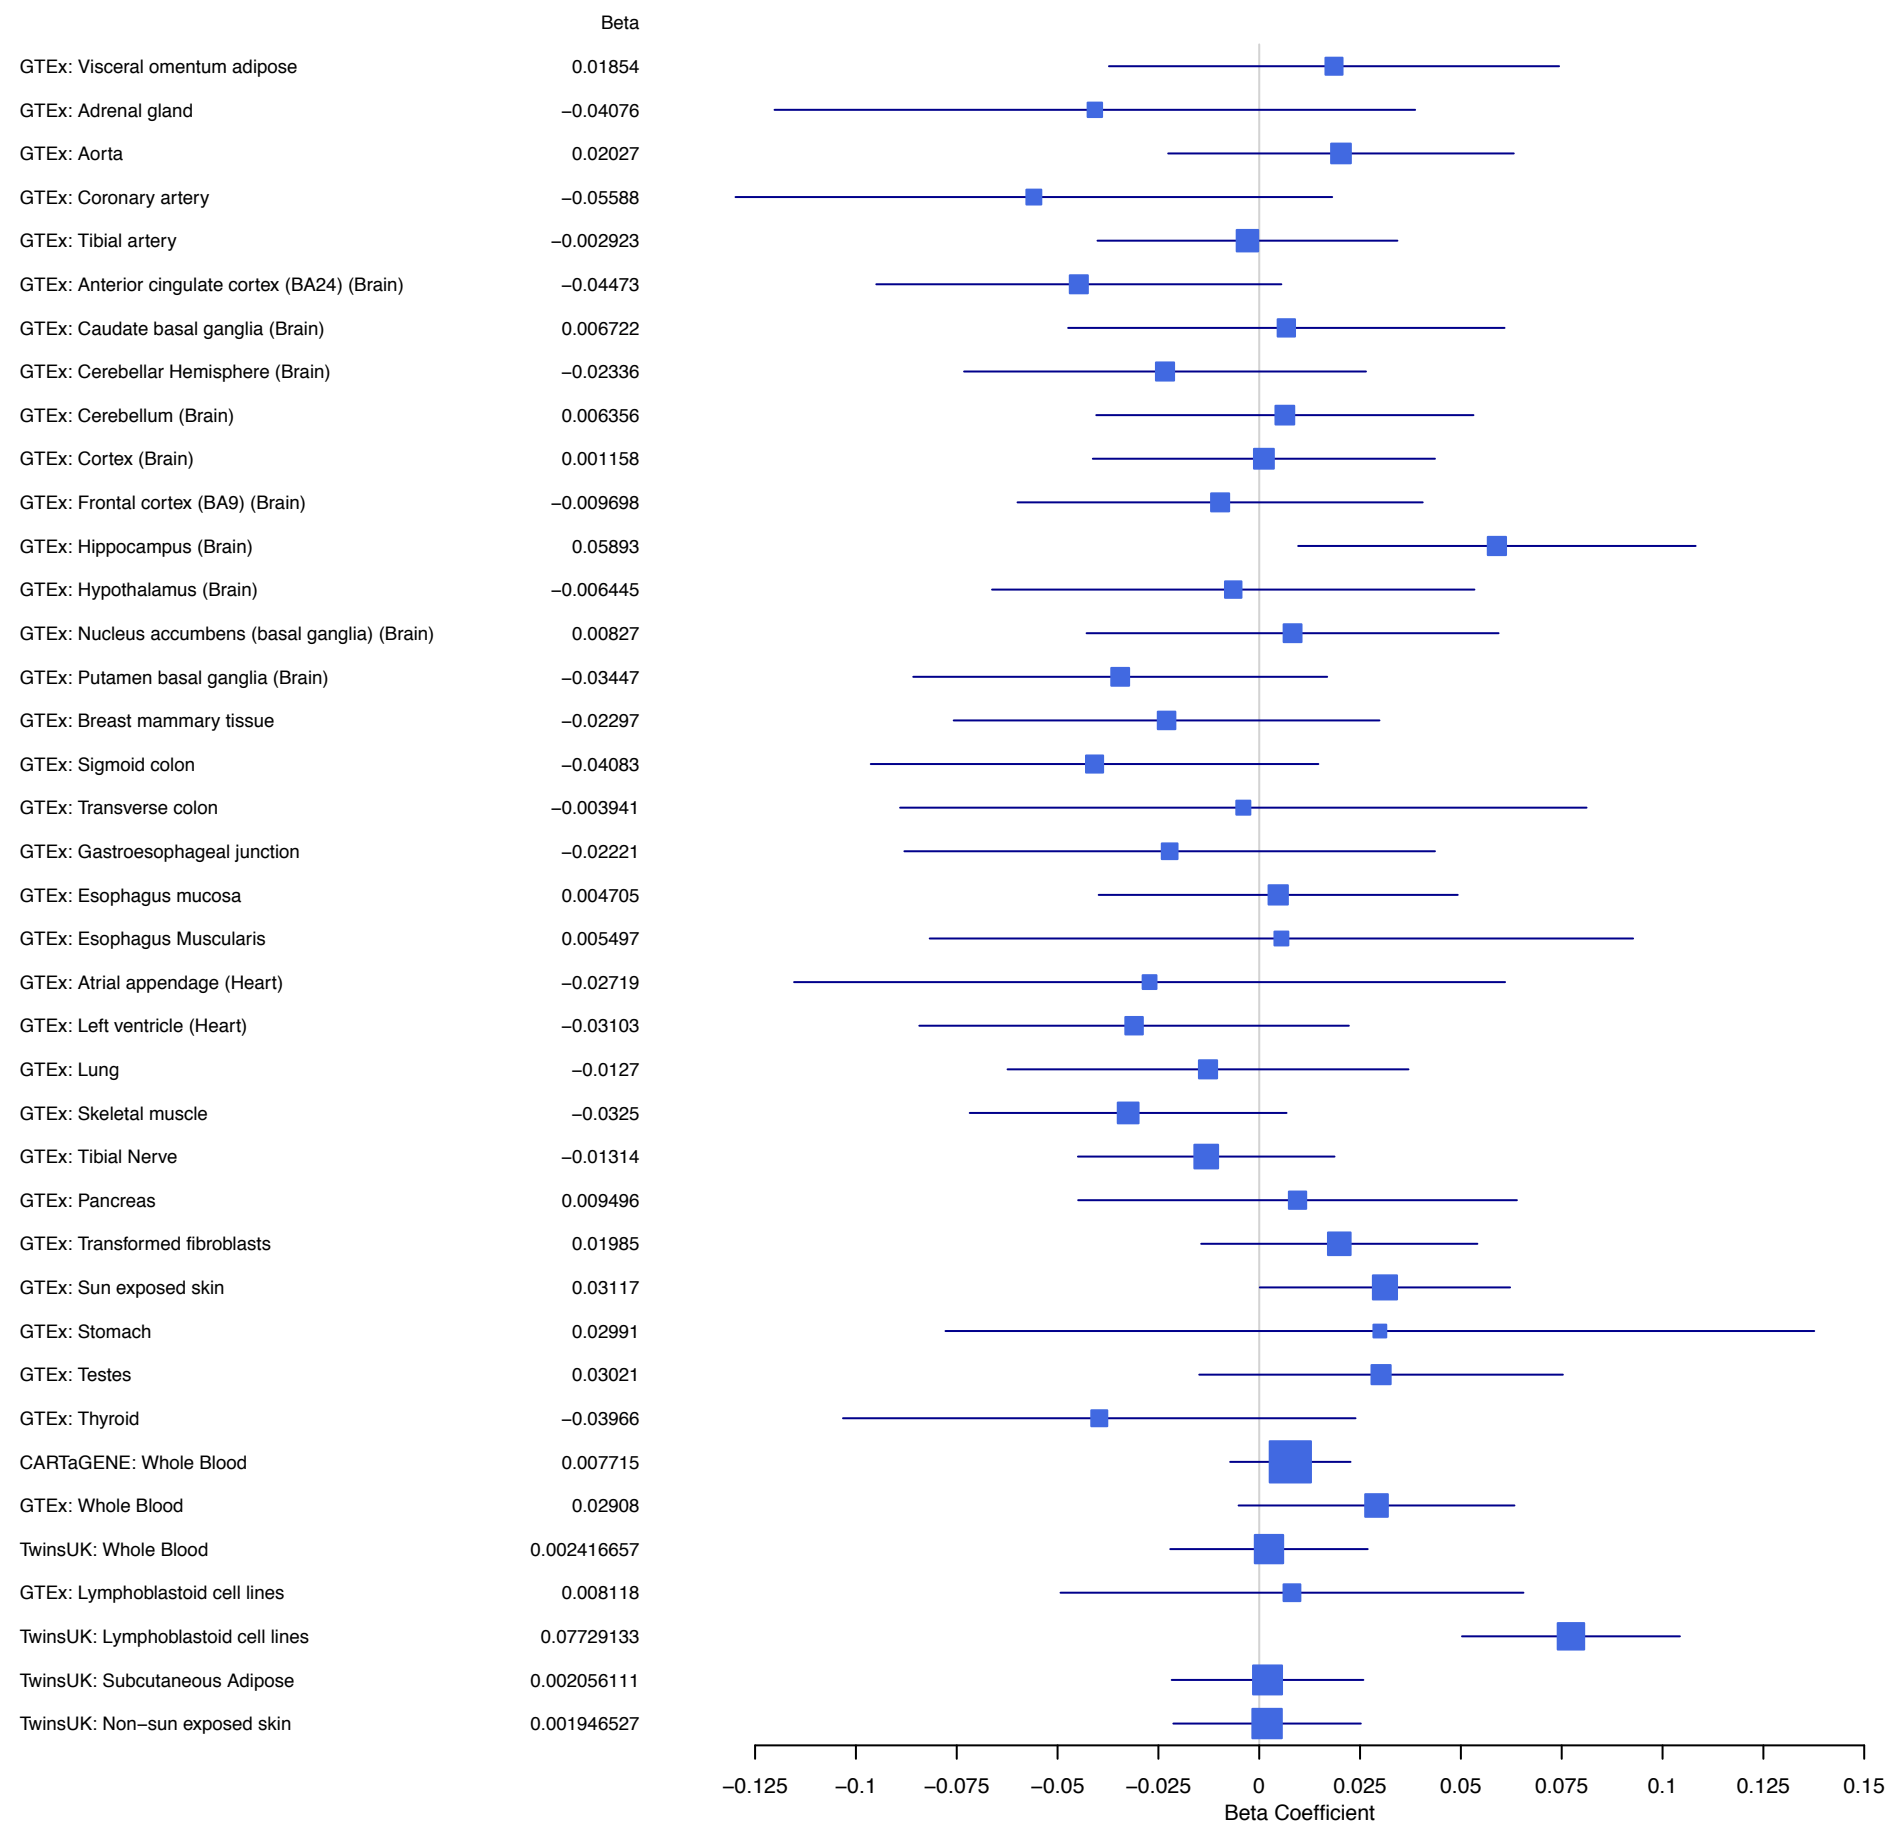

## rs2879224 : MTND2

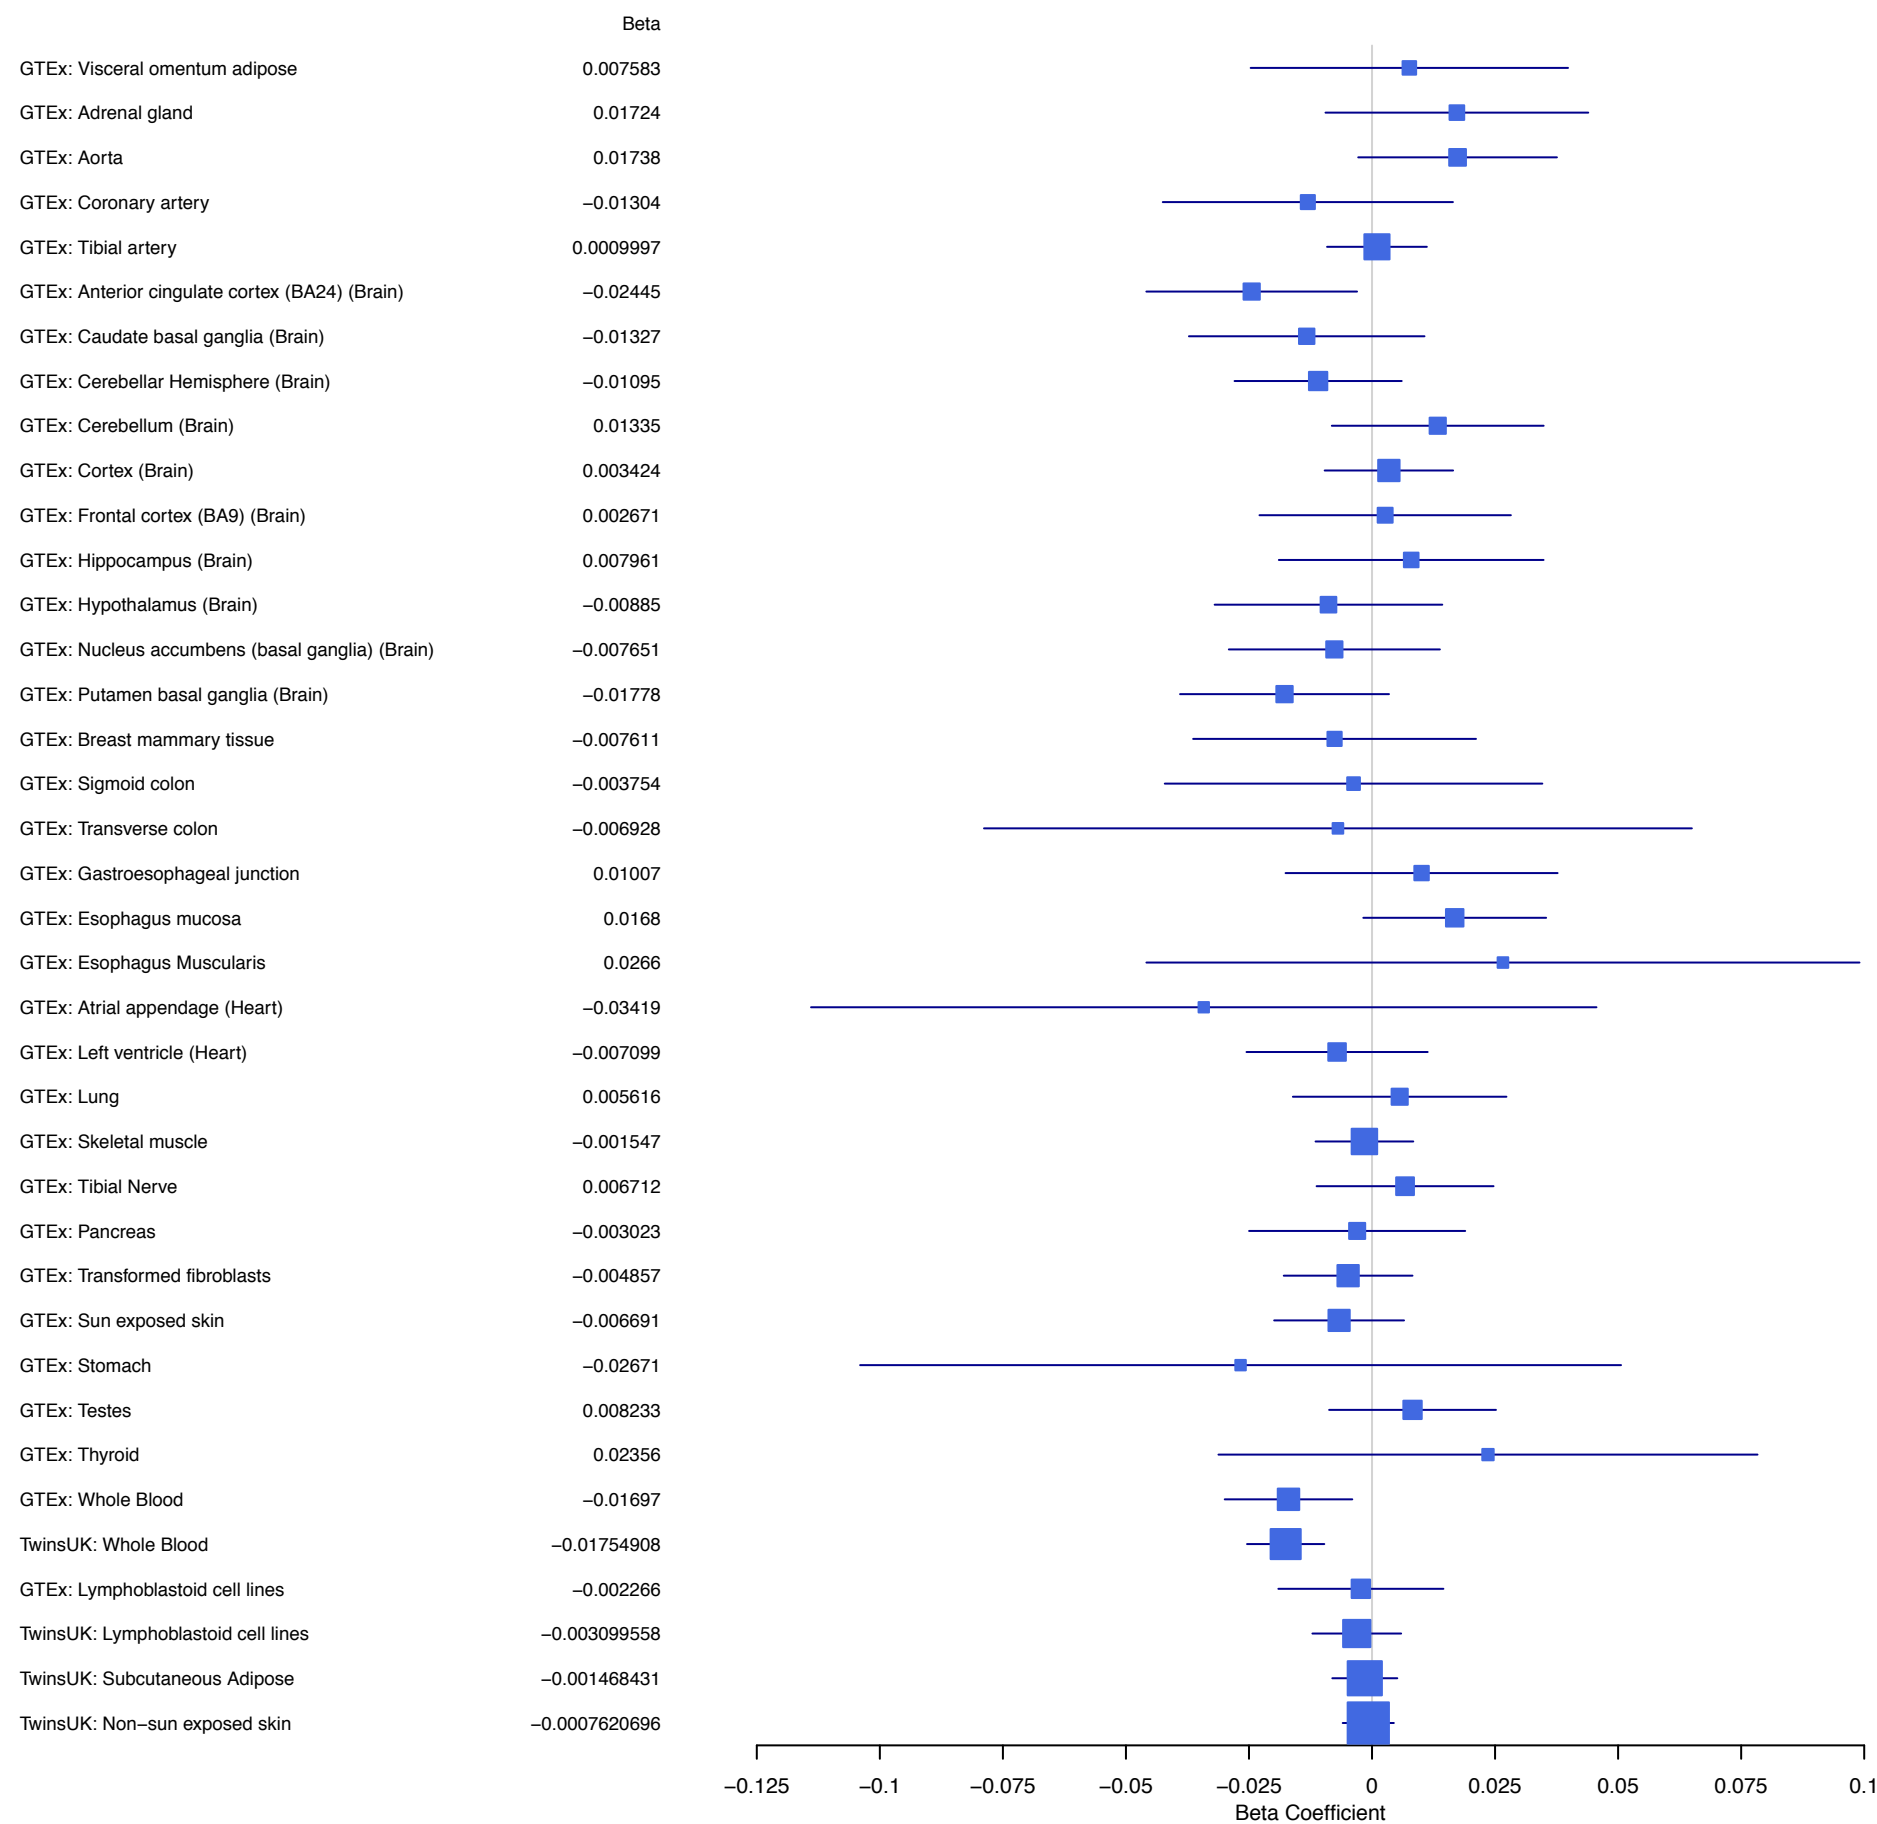

## rs6545512 : MTND6

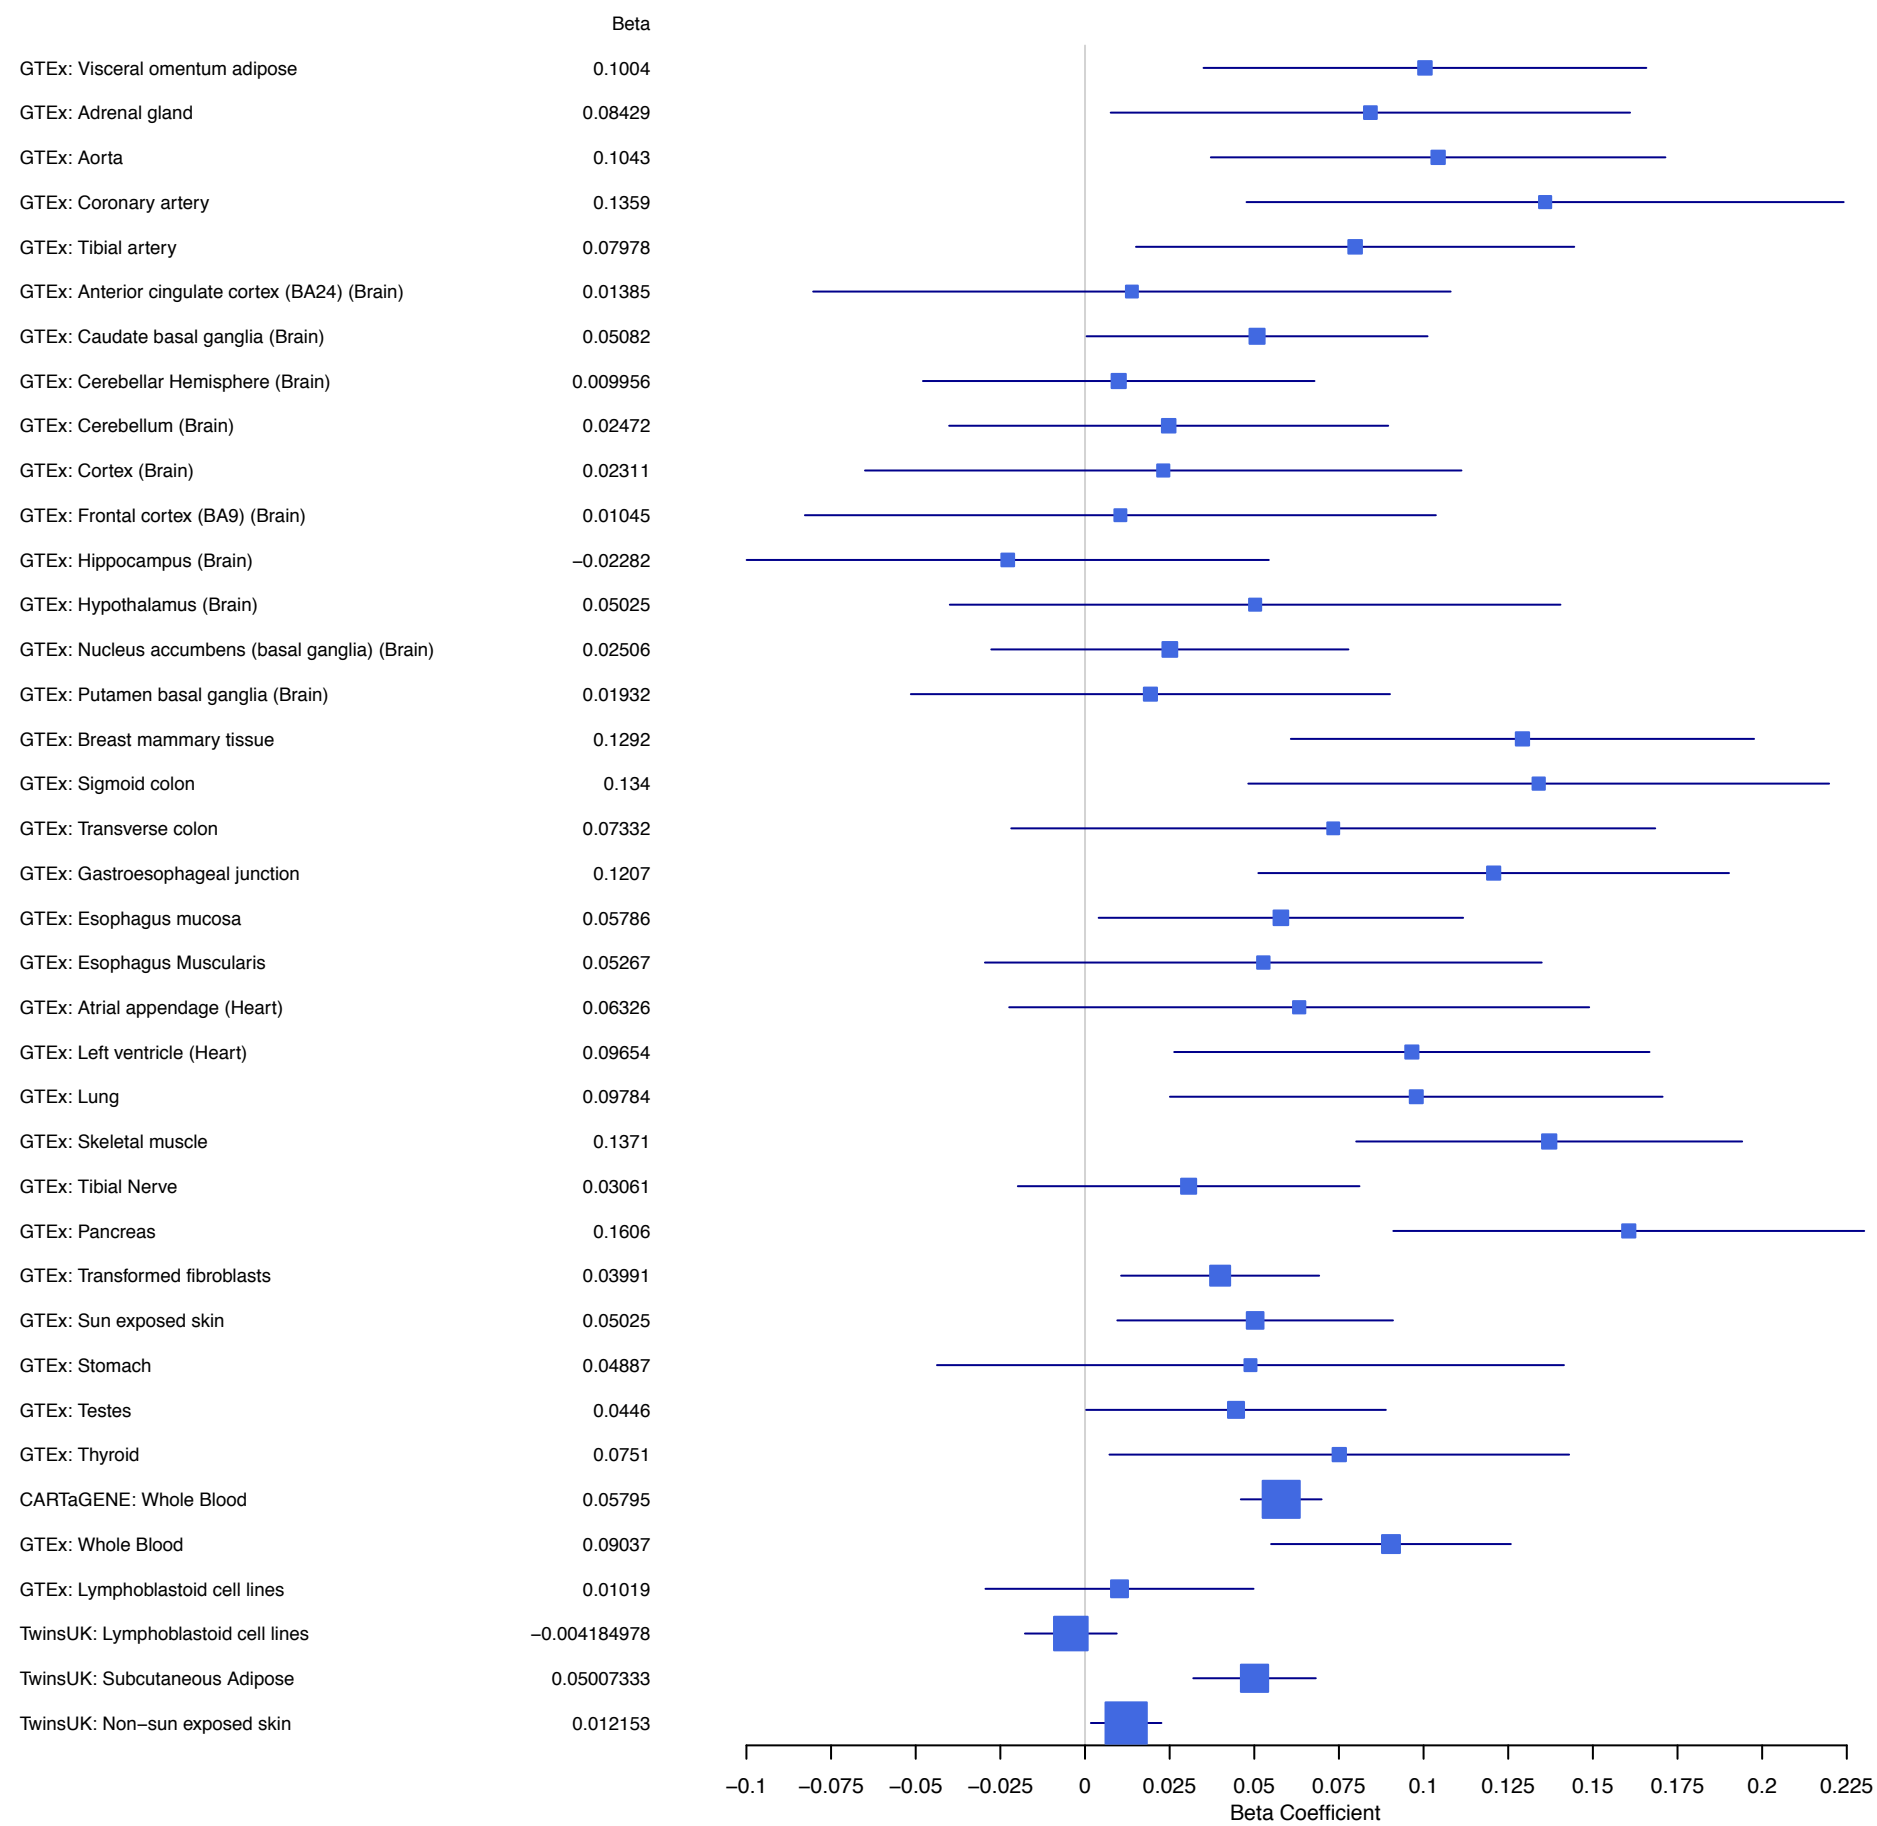

## rs6885116 : MTND3

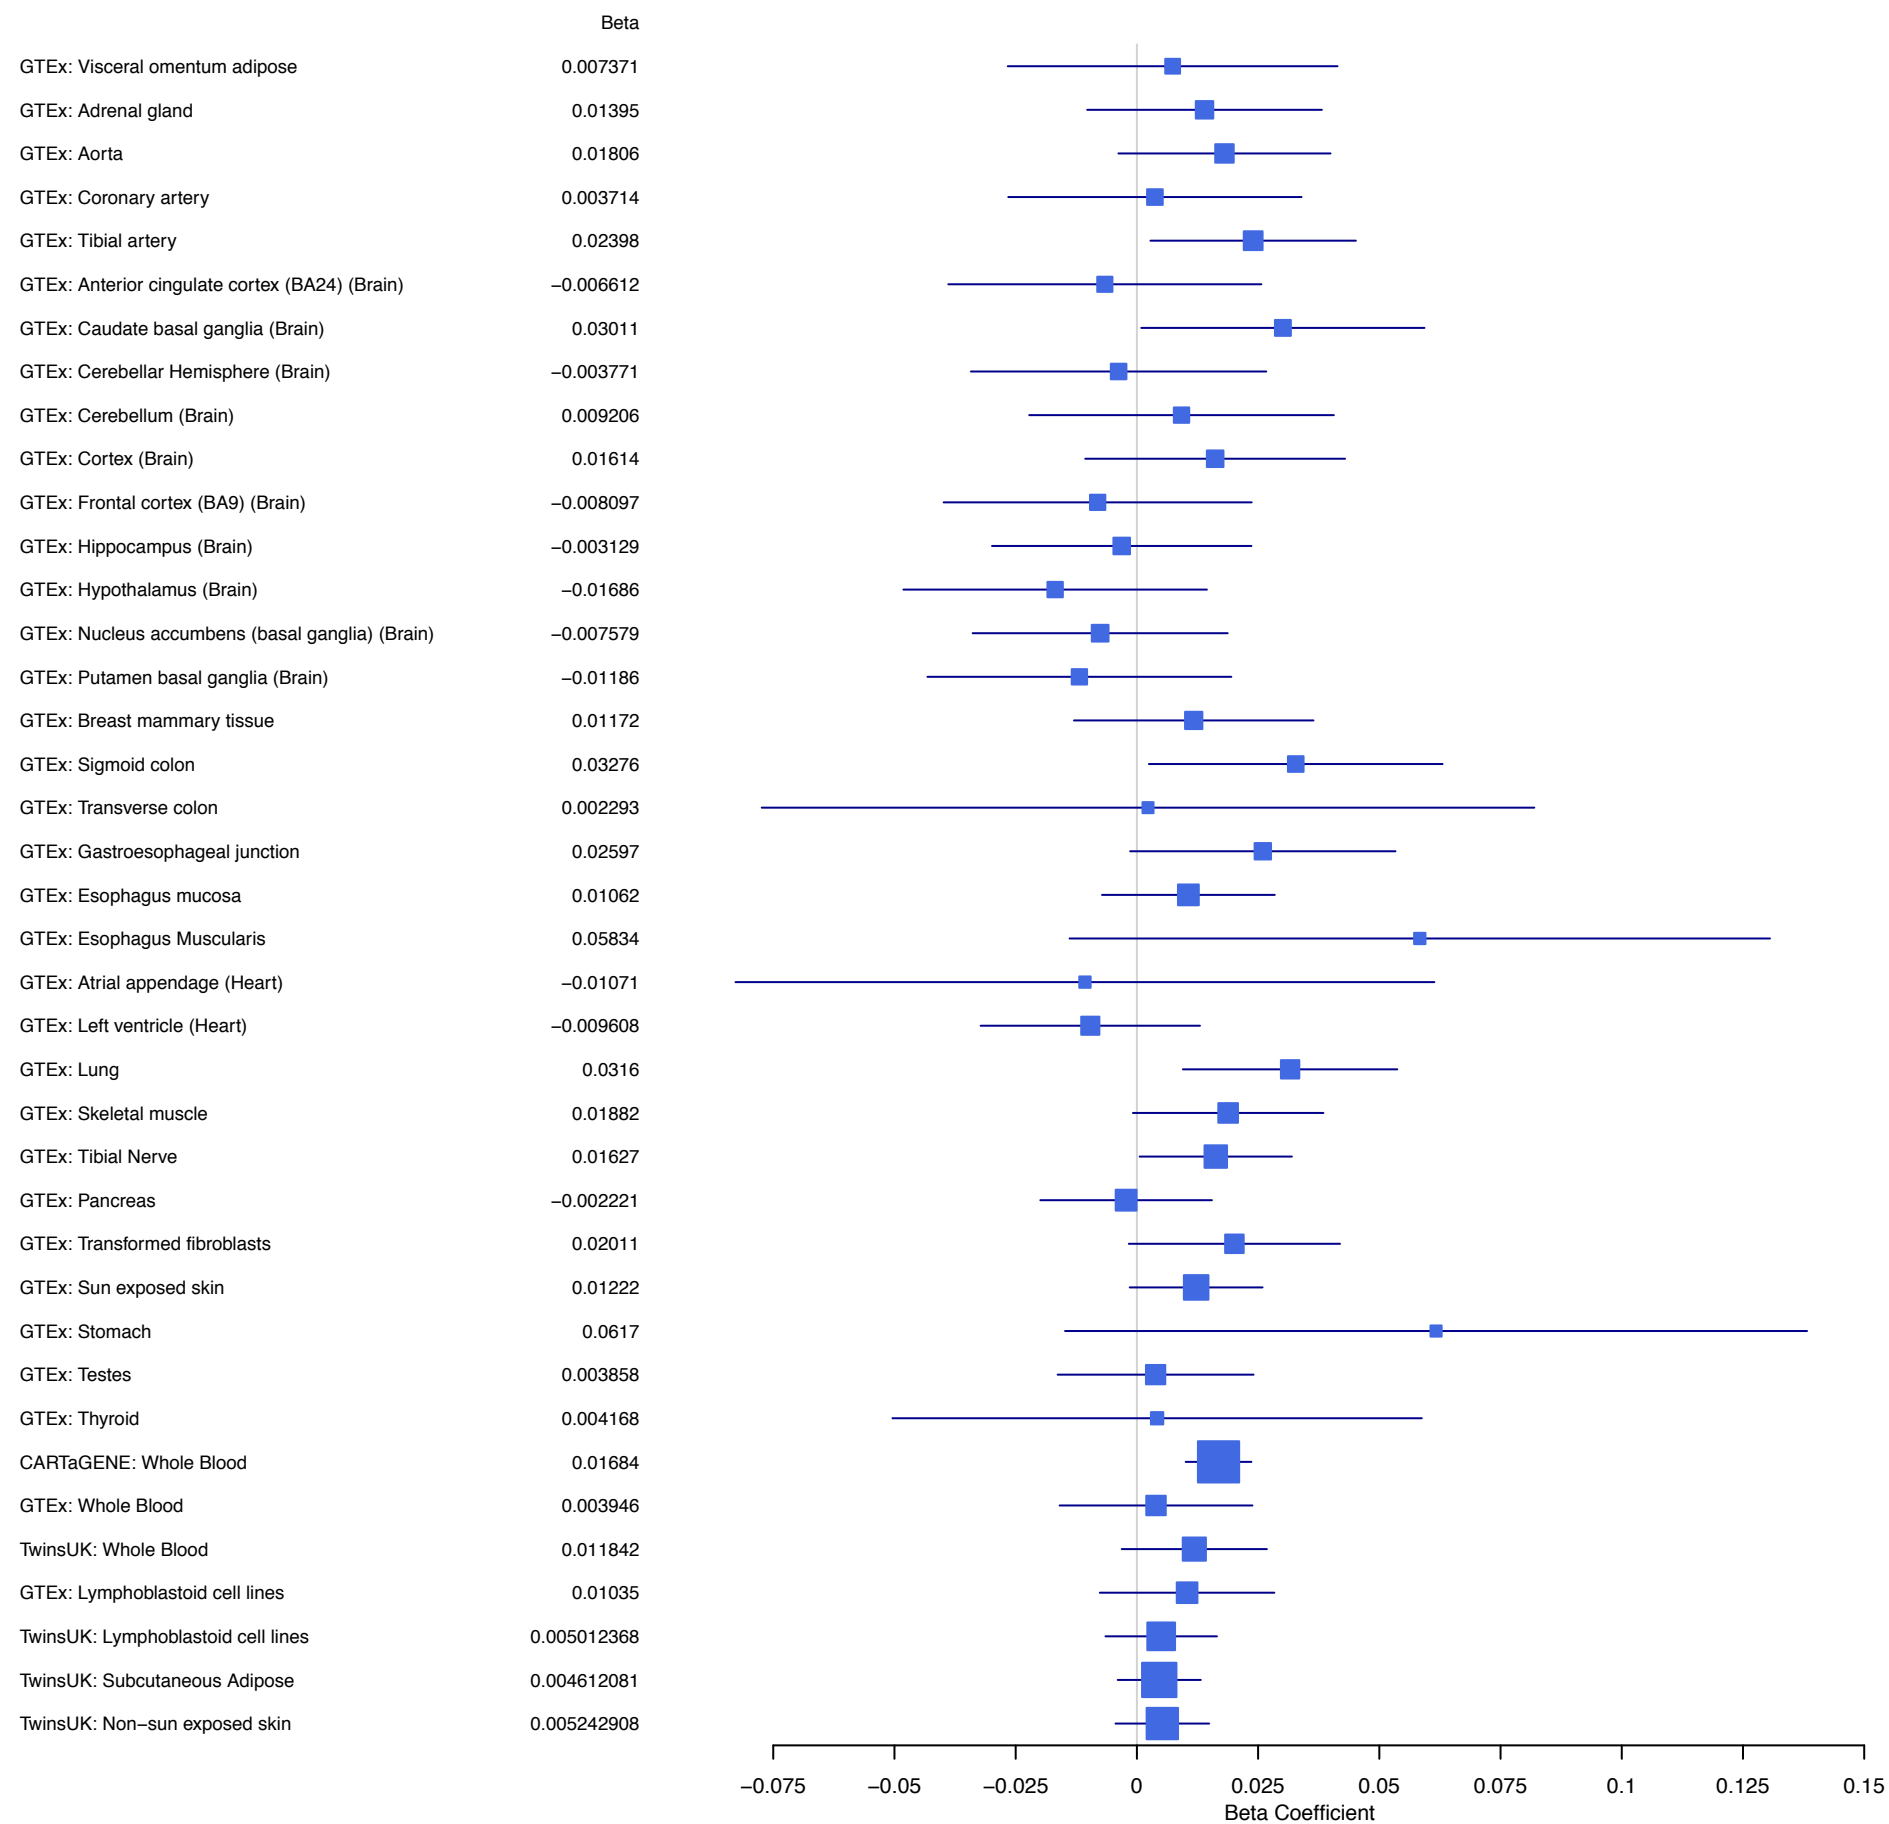

## rs6973982 : MTATP6

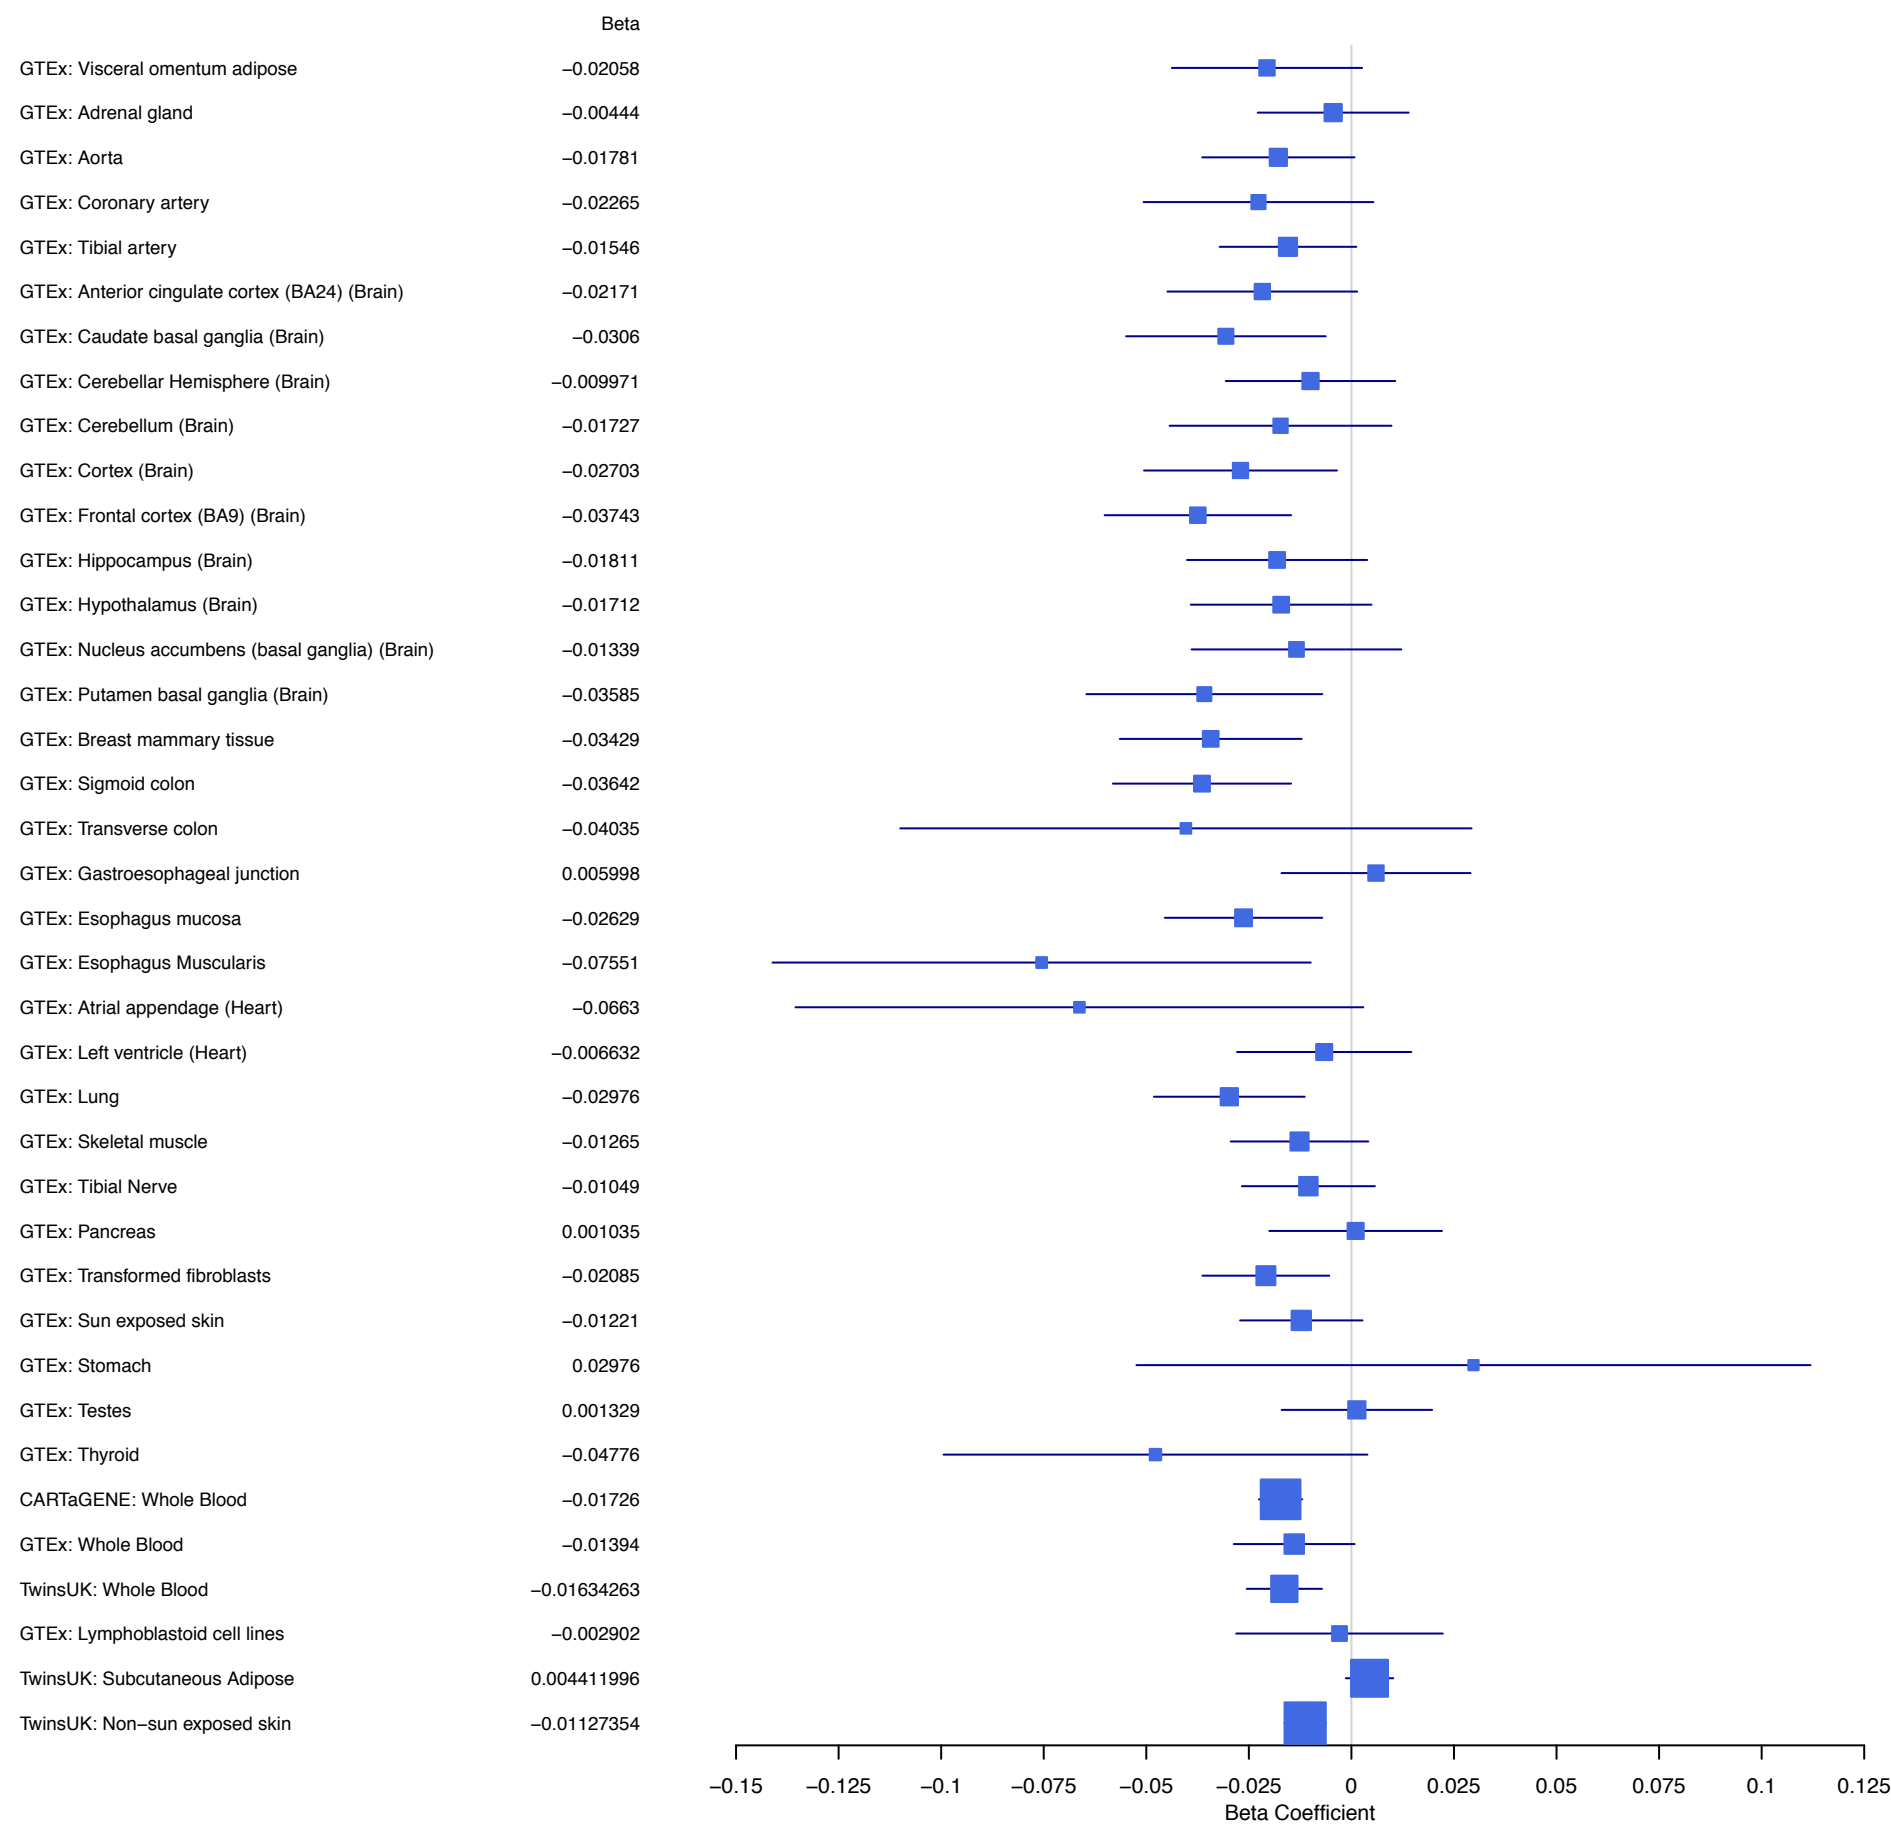

rs6973982 : MTCO2

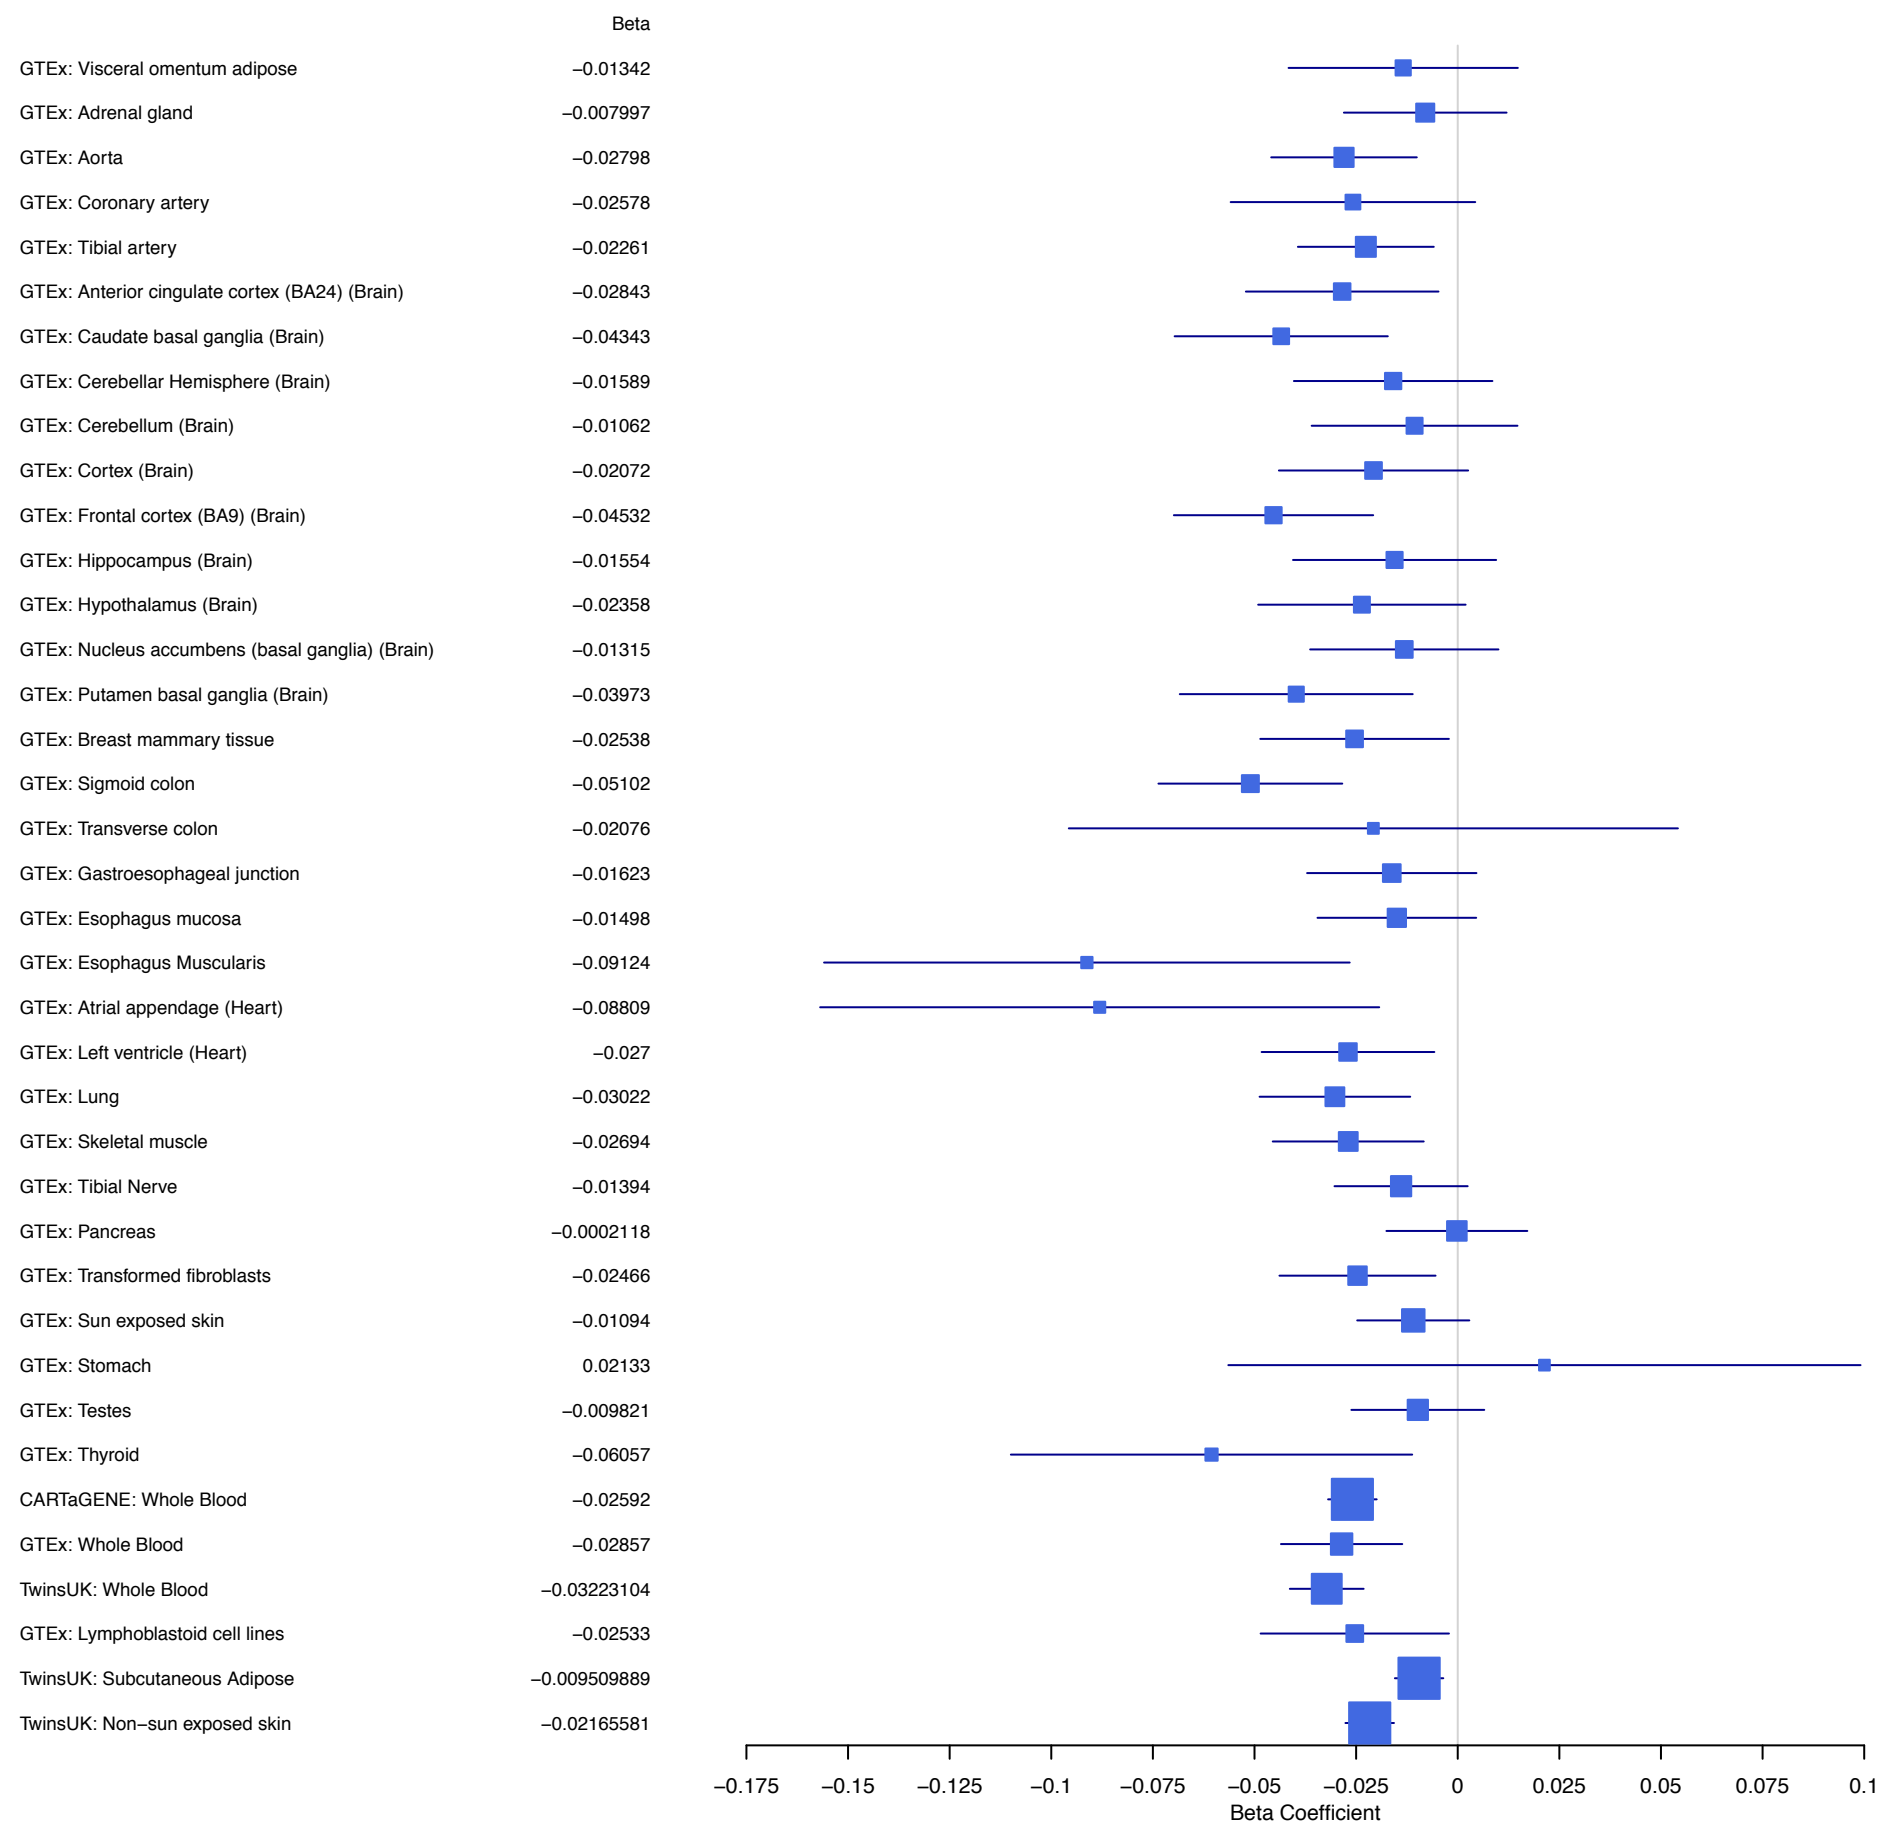

## rs6973982 : MTCO3

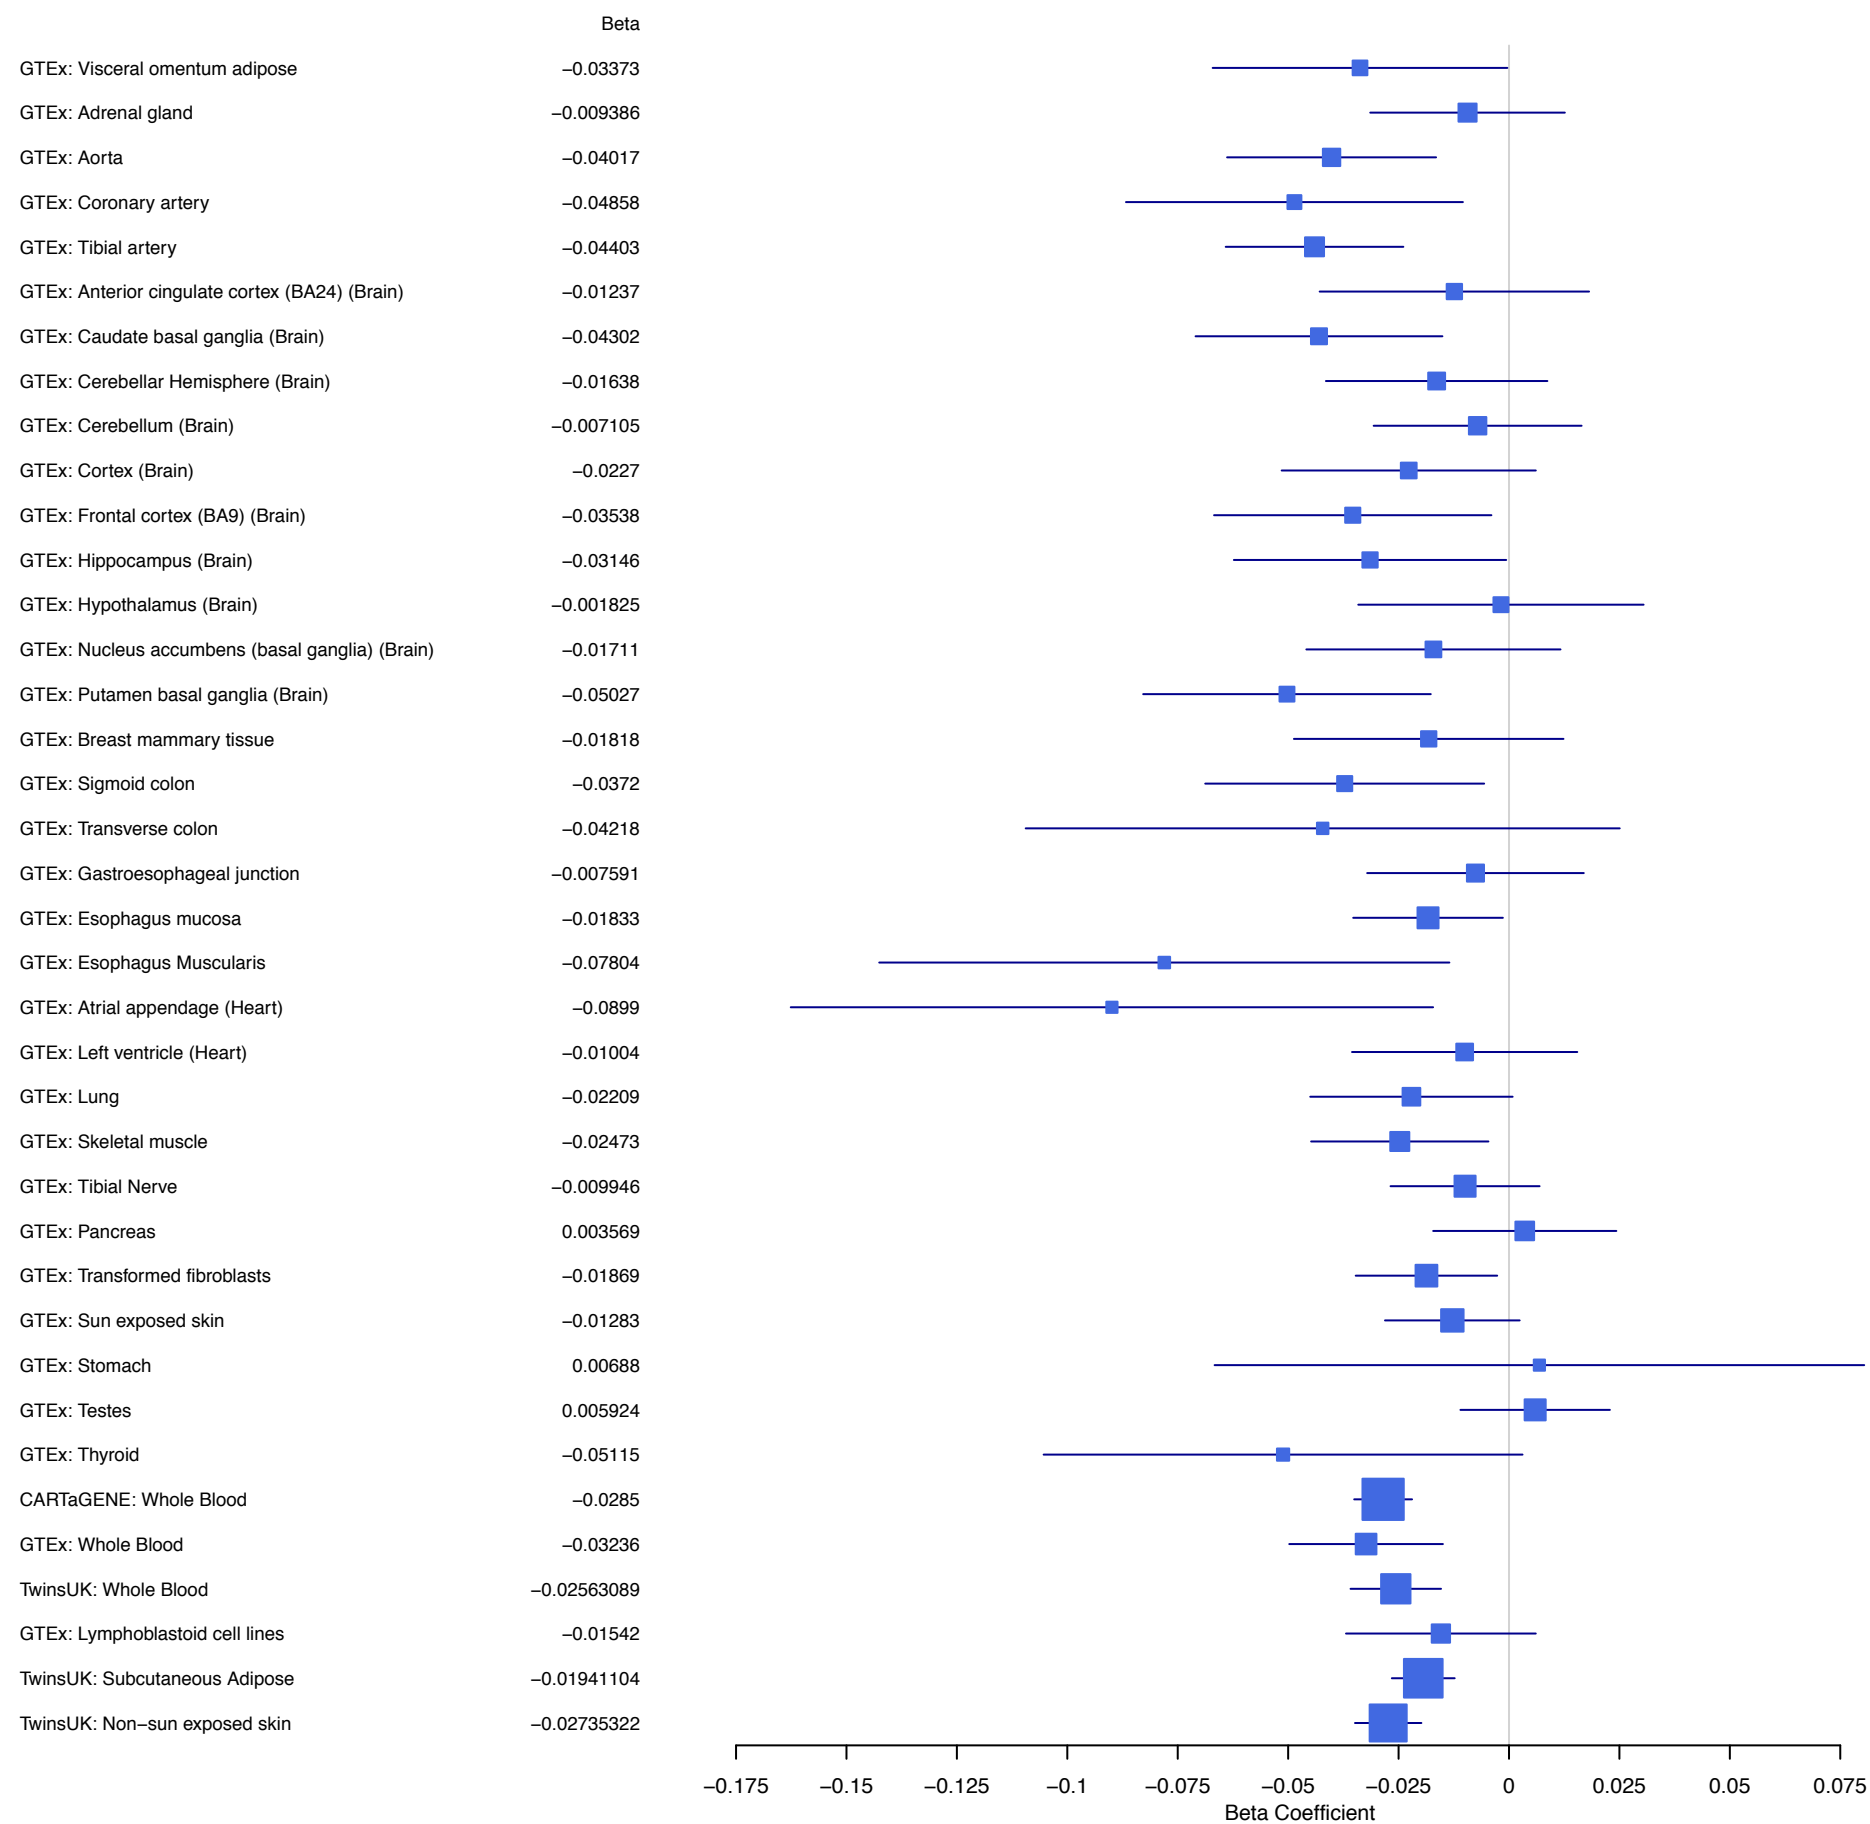

## rs6973982 : MTND4

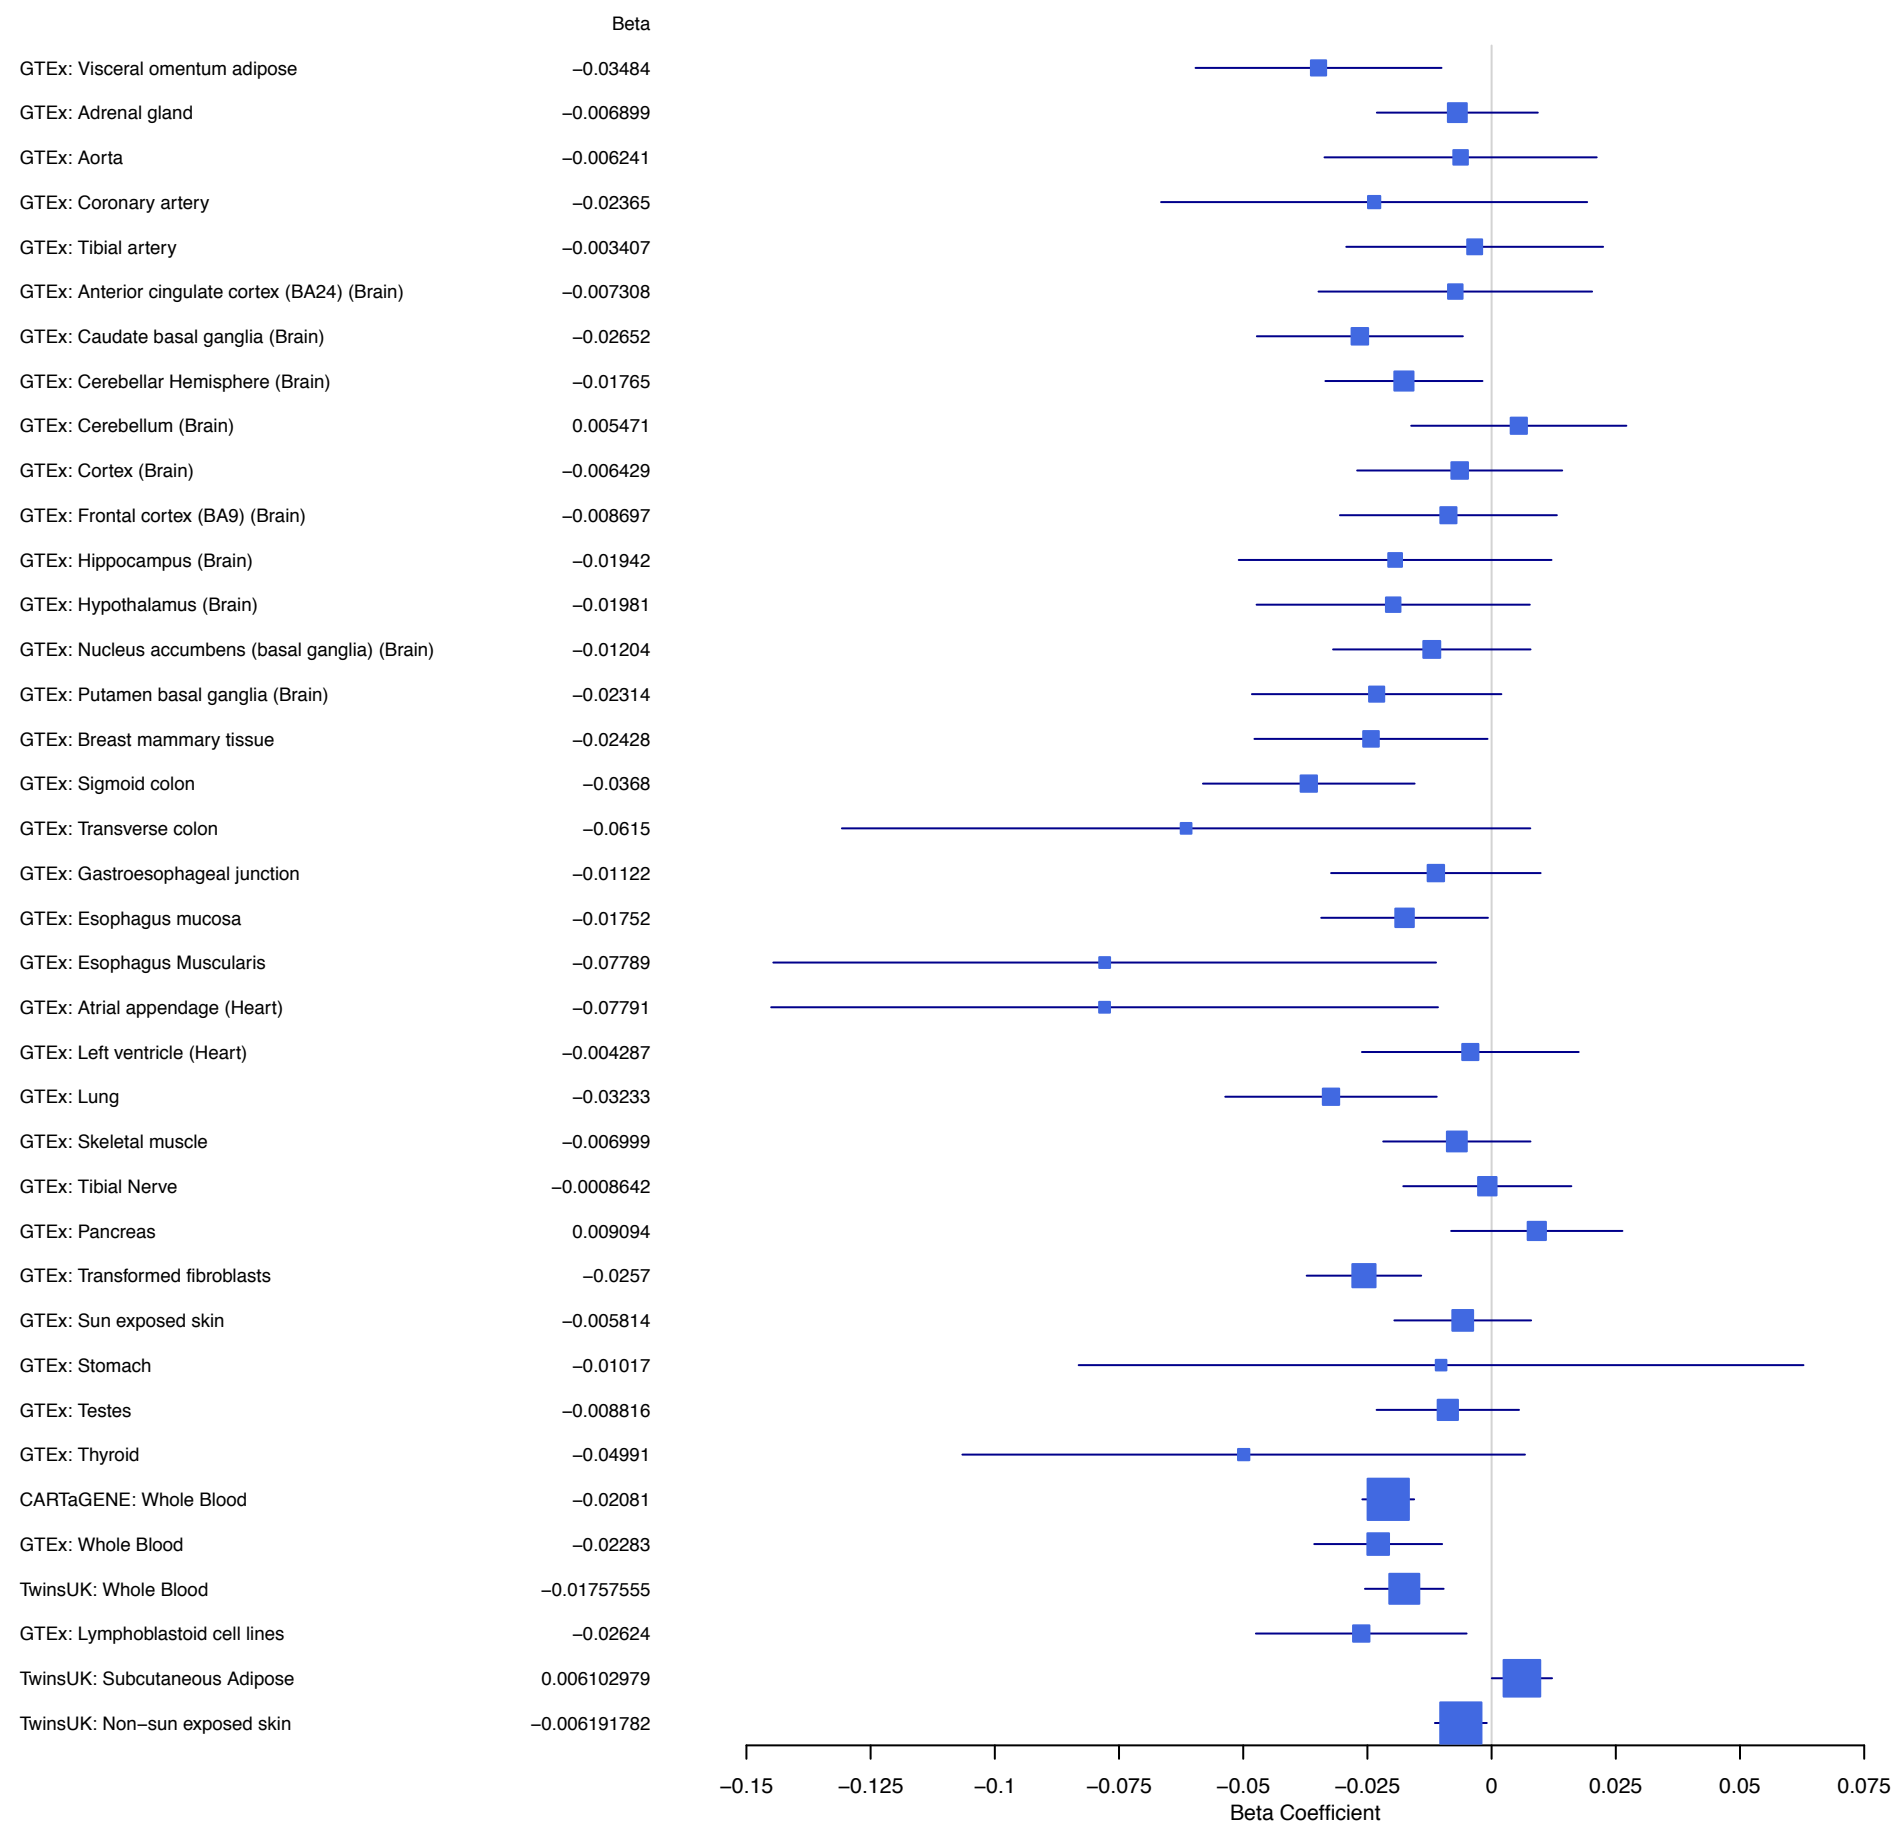

## rs7158706 : MTND2

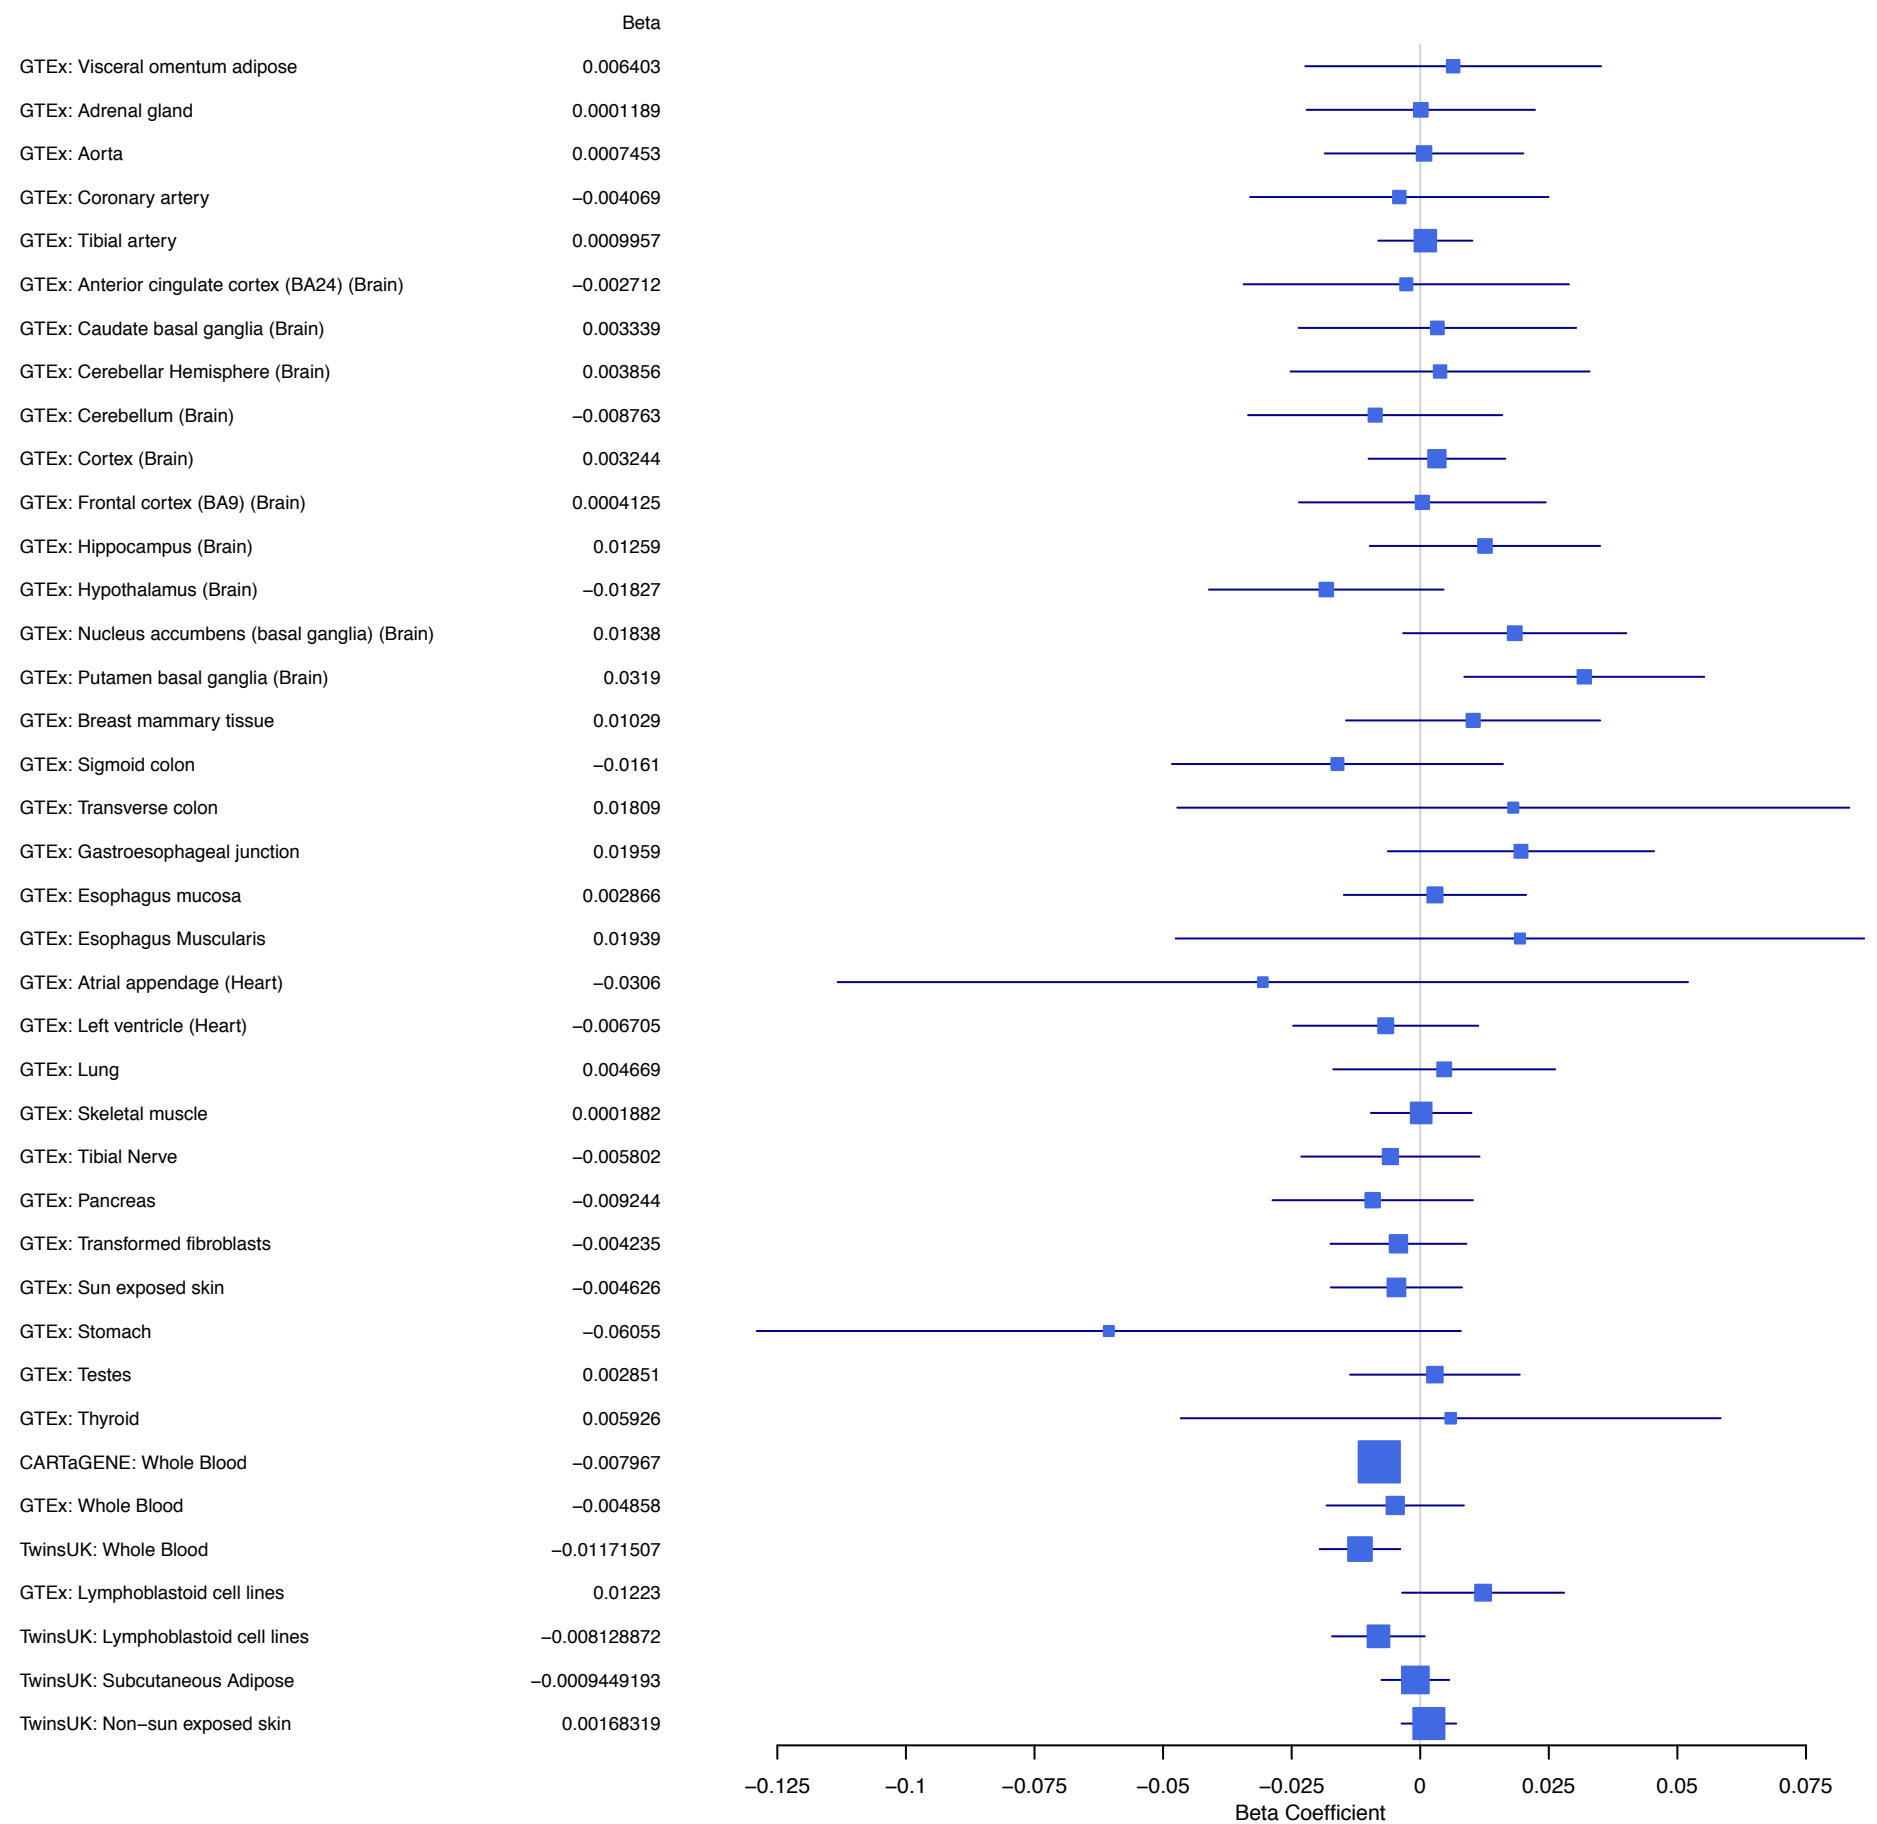

rs7297229 : MTRNR2

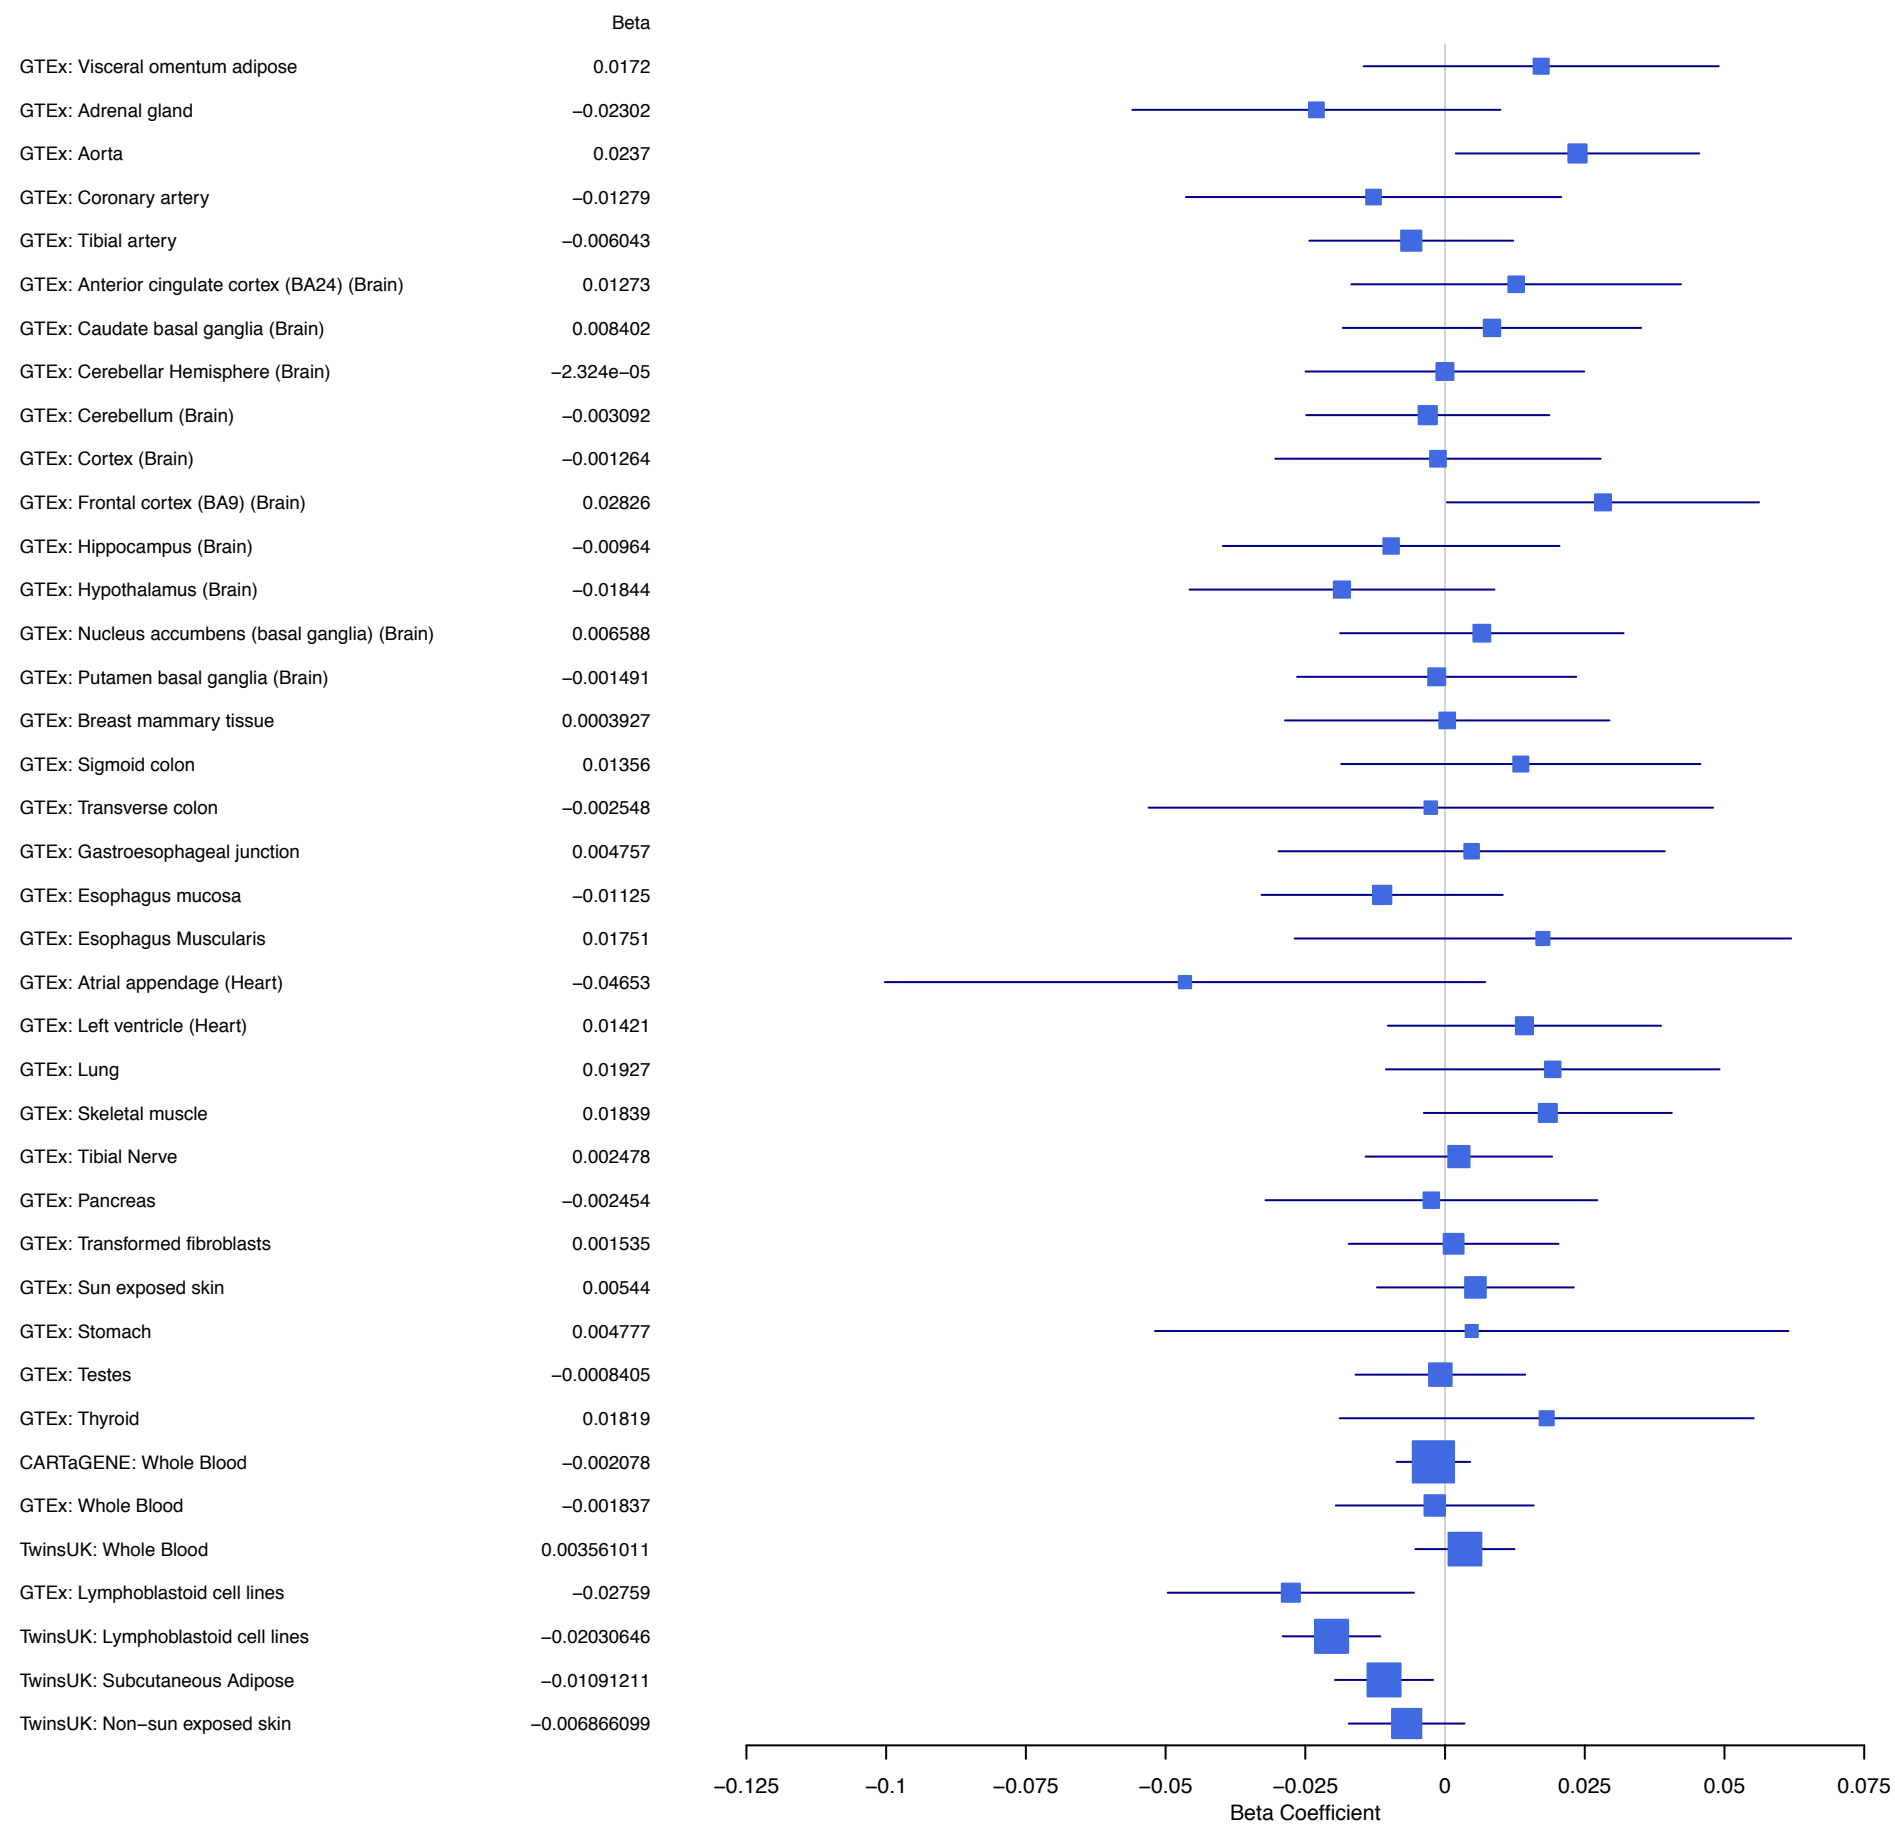

## rs7558127 : MTND6

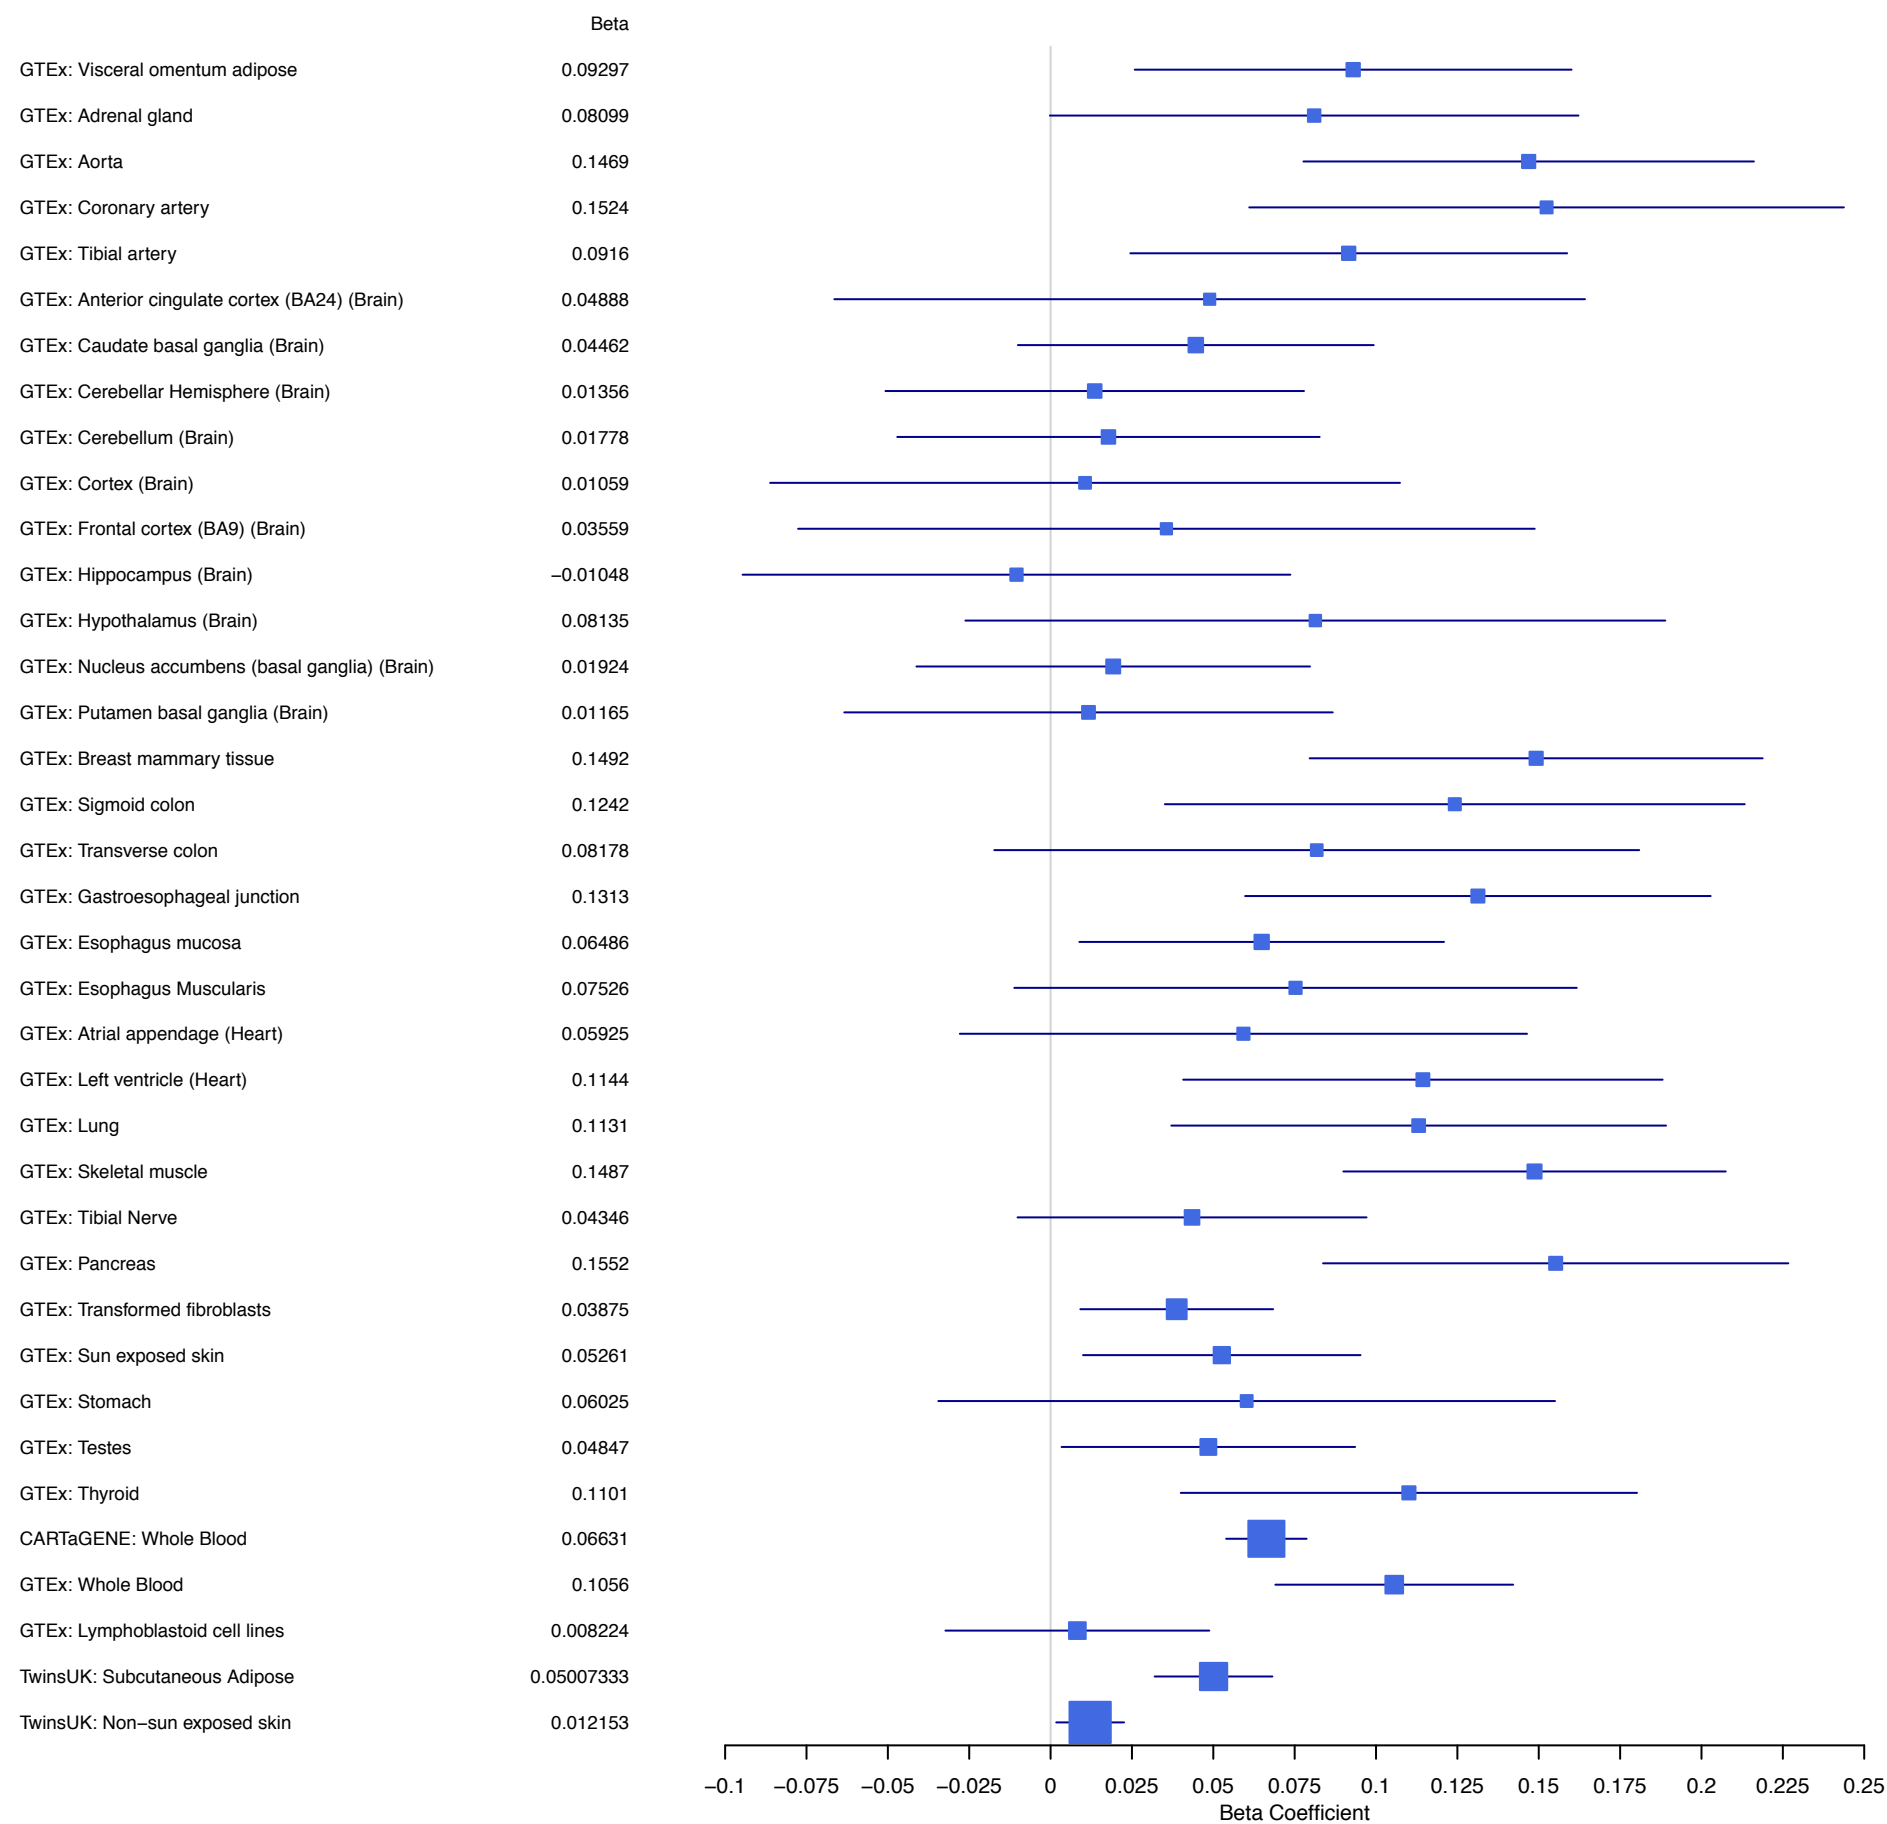

## rs7559561: MTCO2

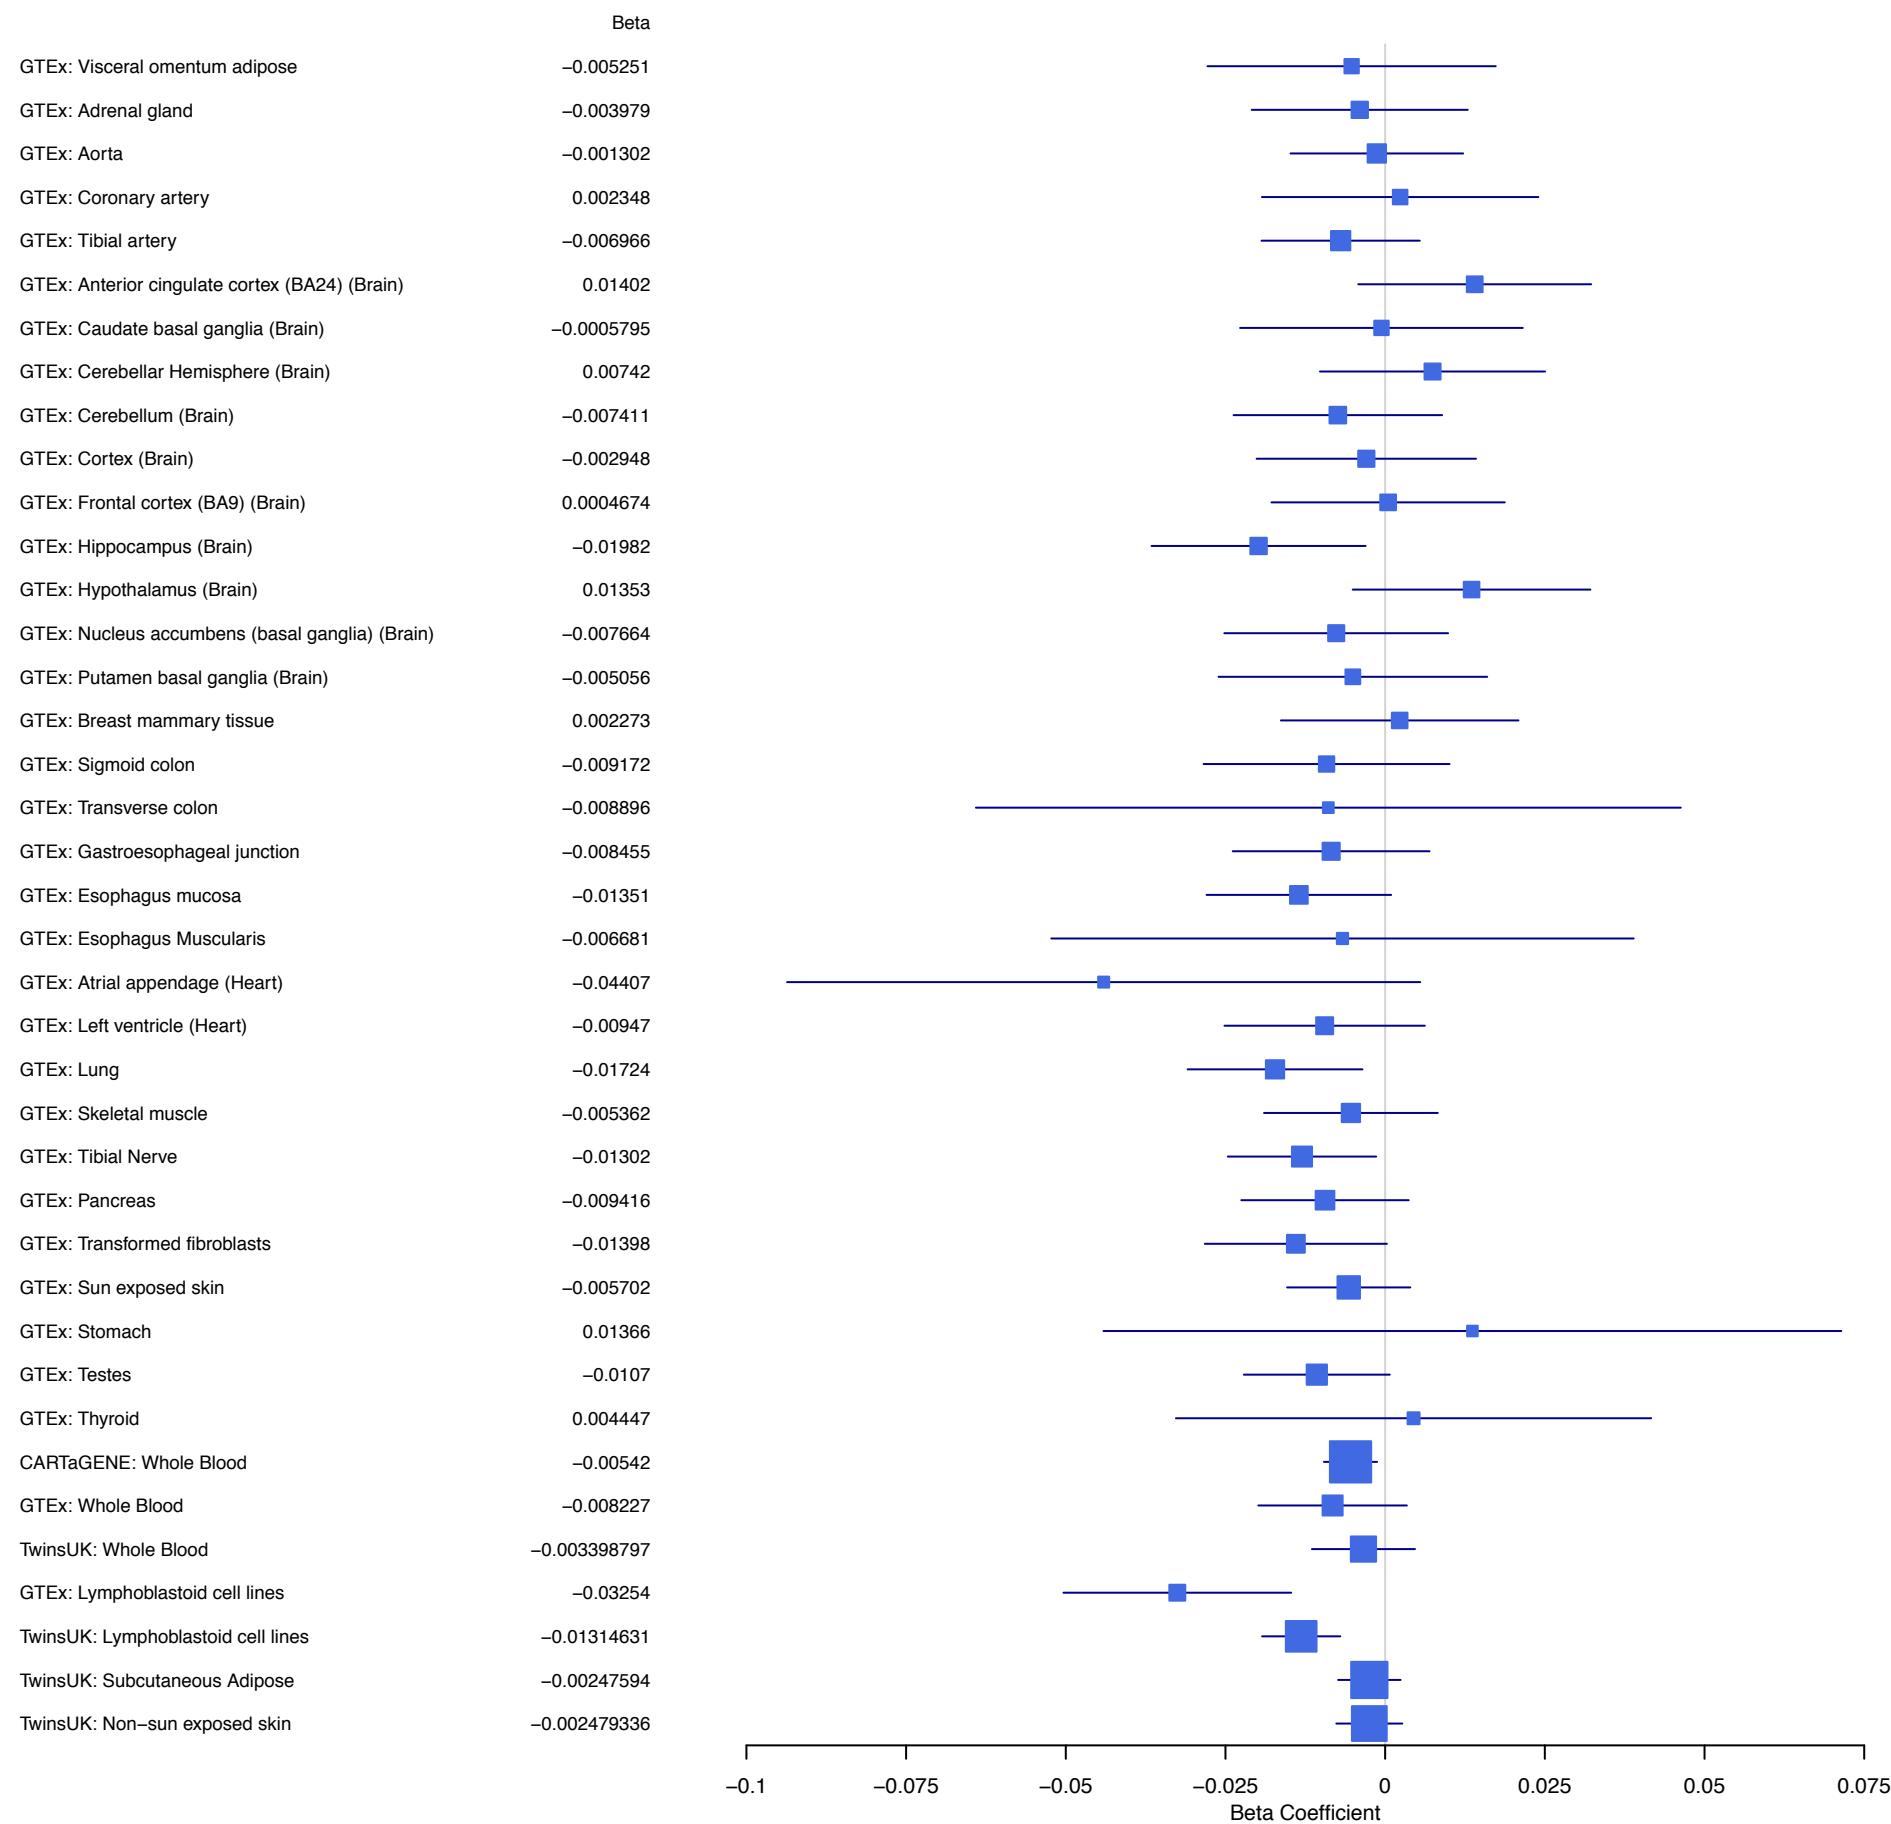

## rs7833624 : MTND4L

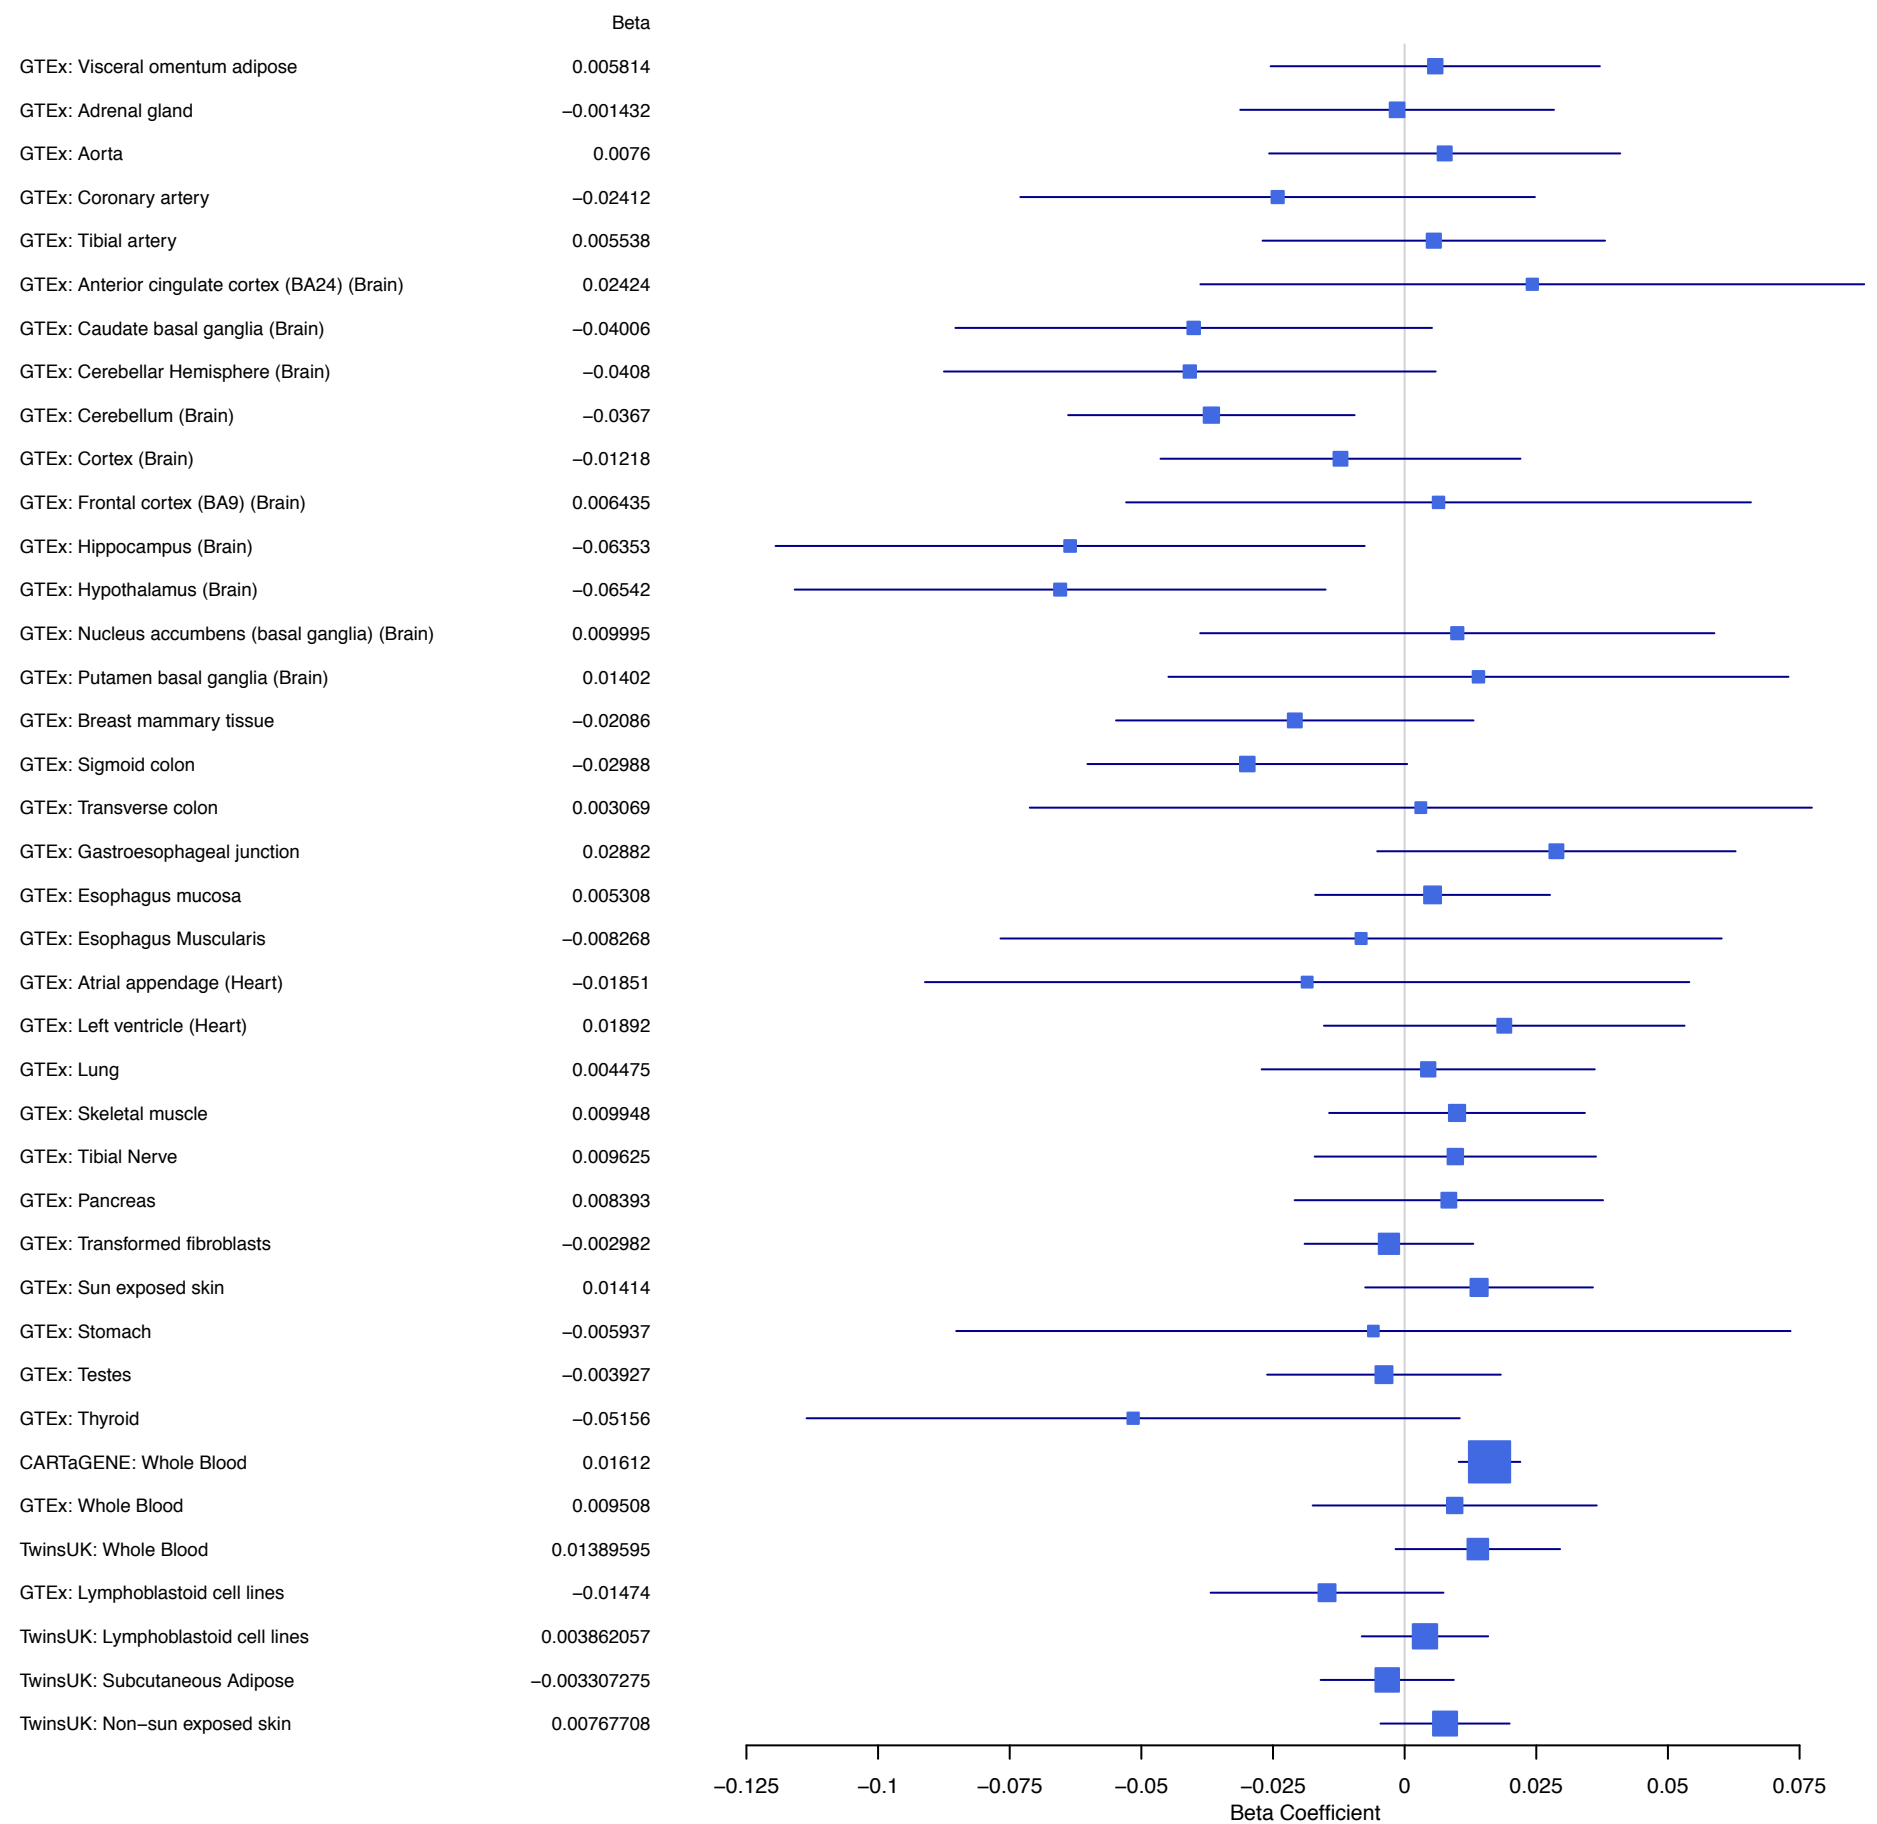

## rs10042734 : MTND3

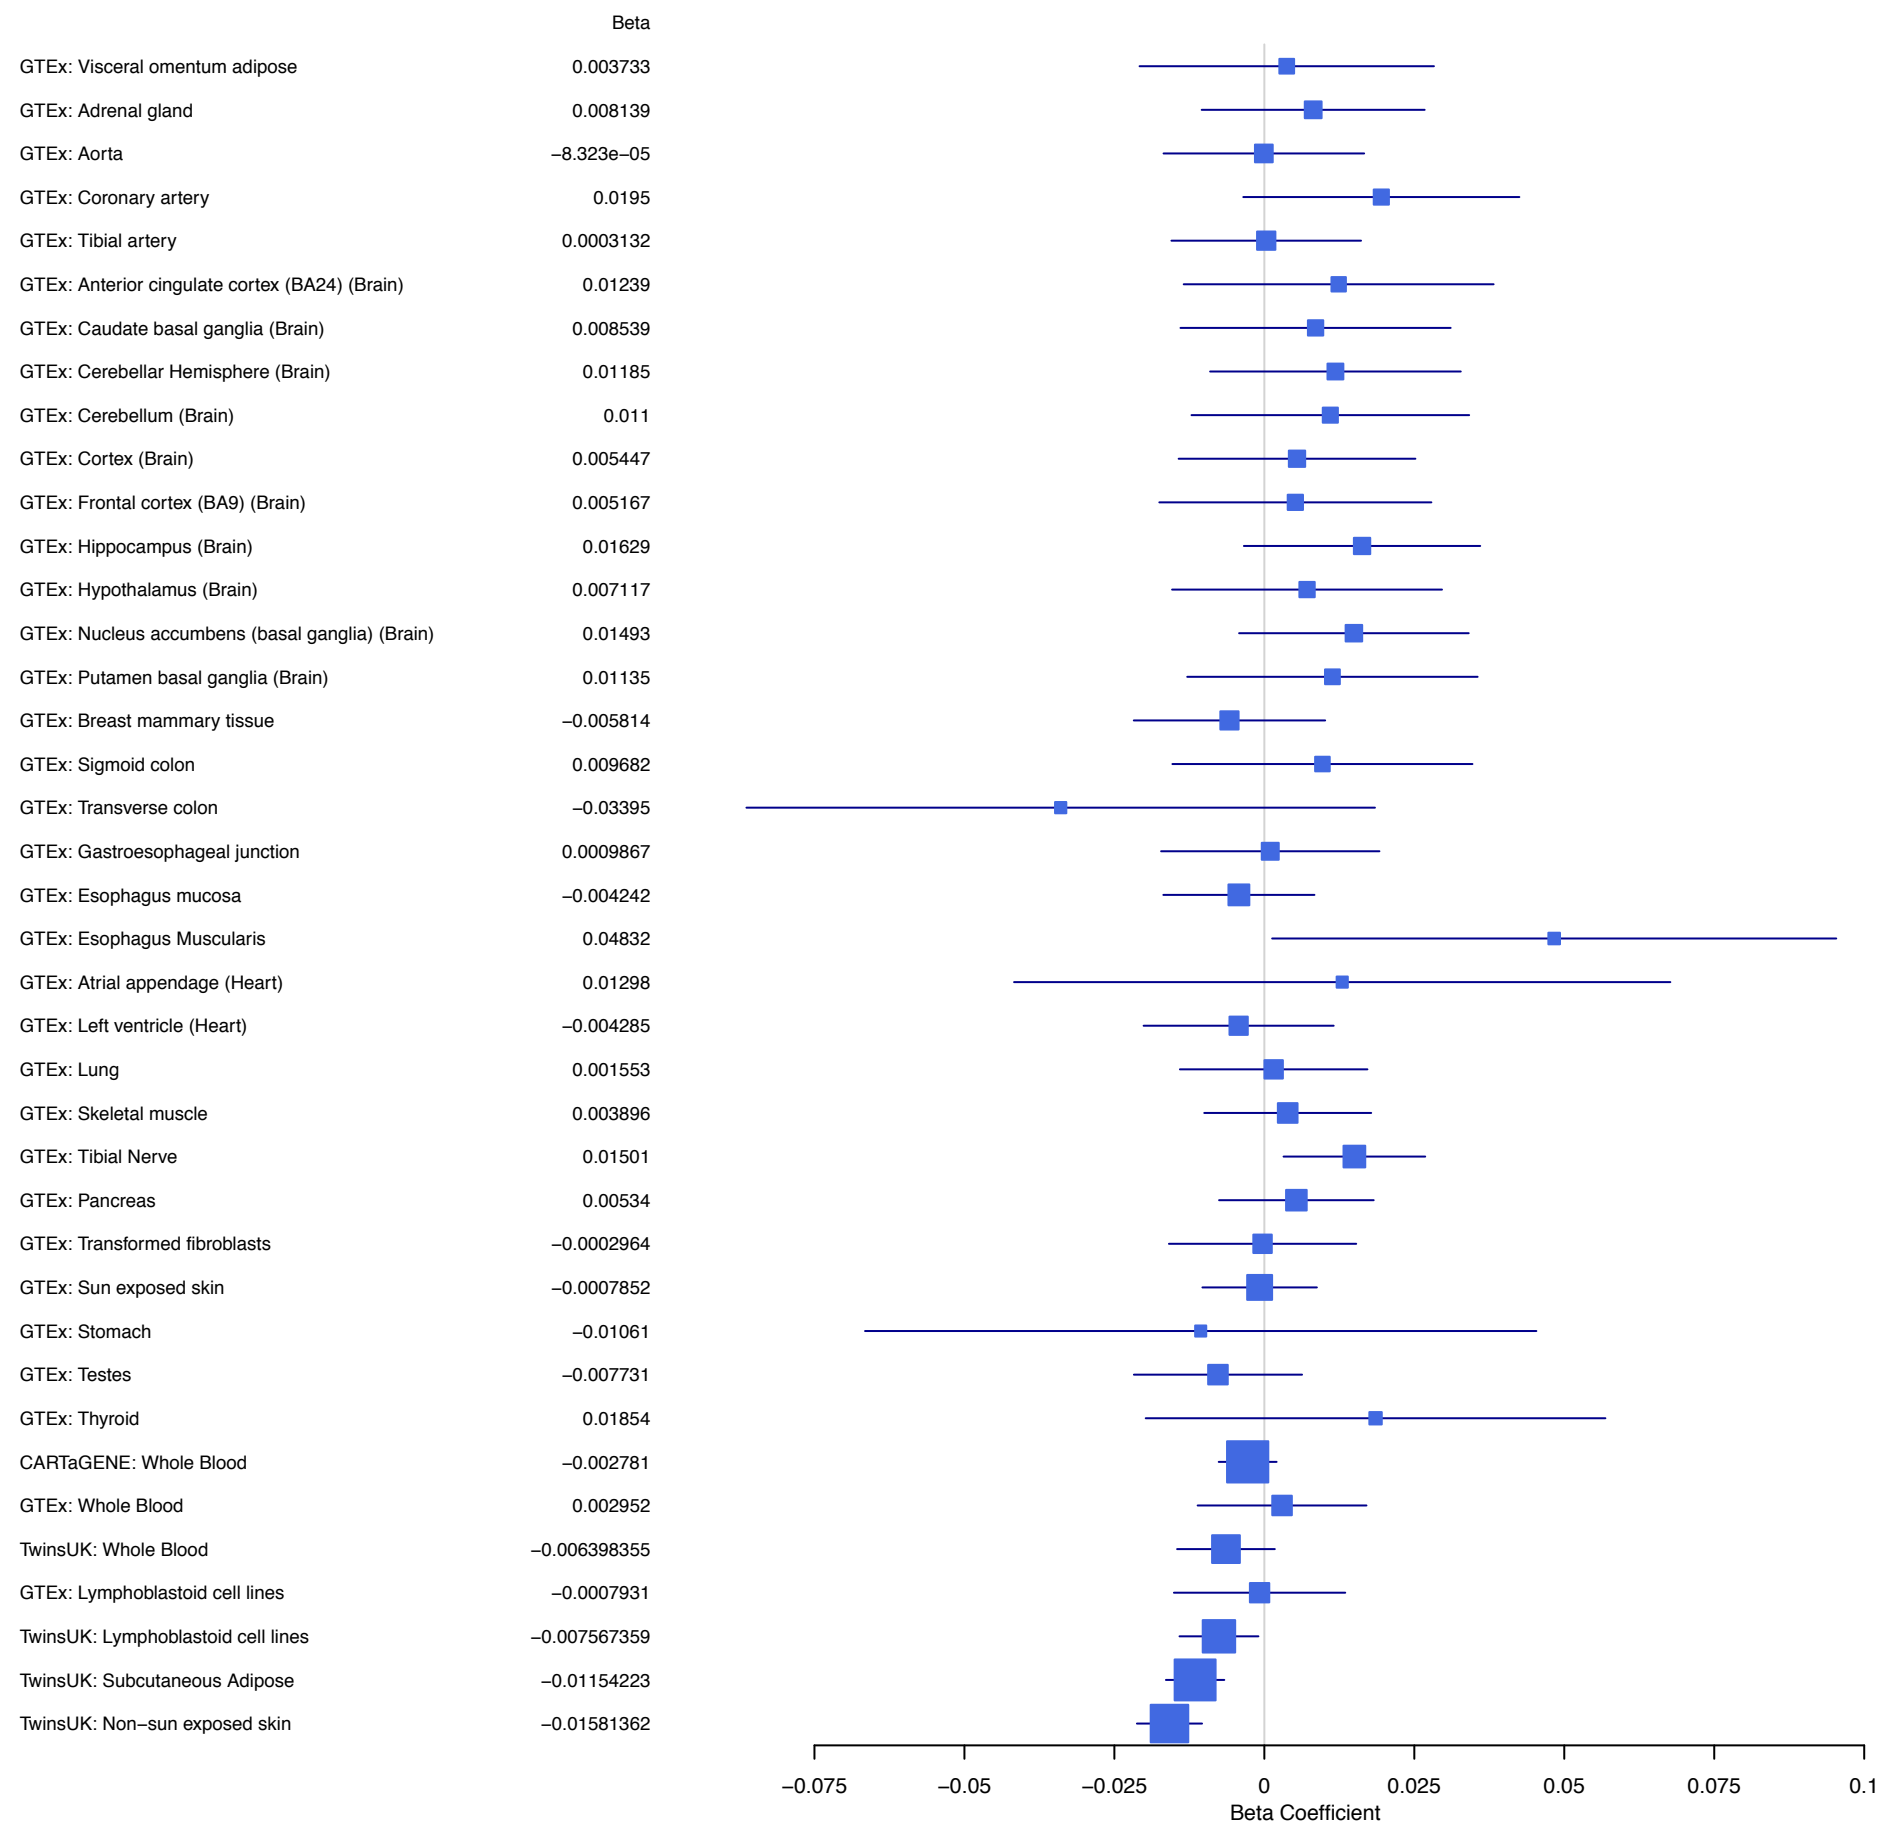

## rs10165864 : MTRNR2

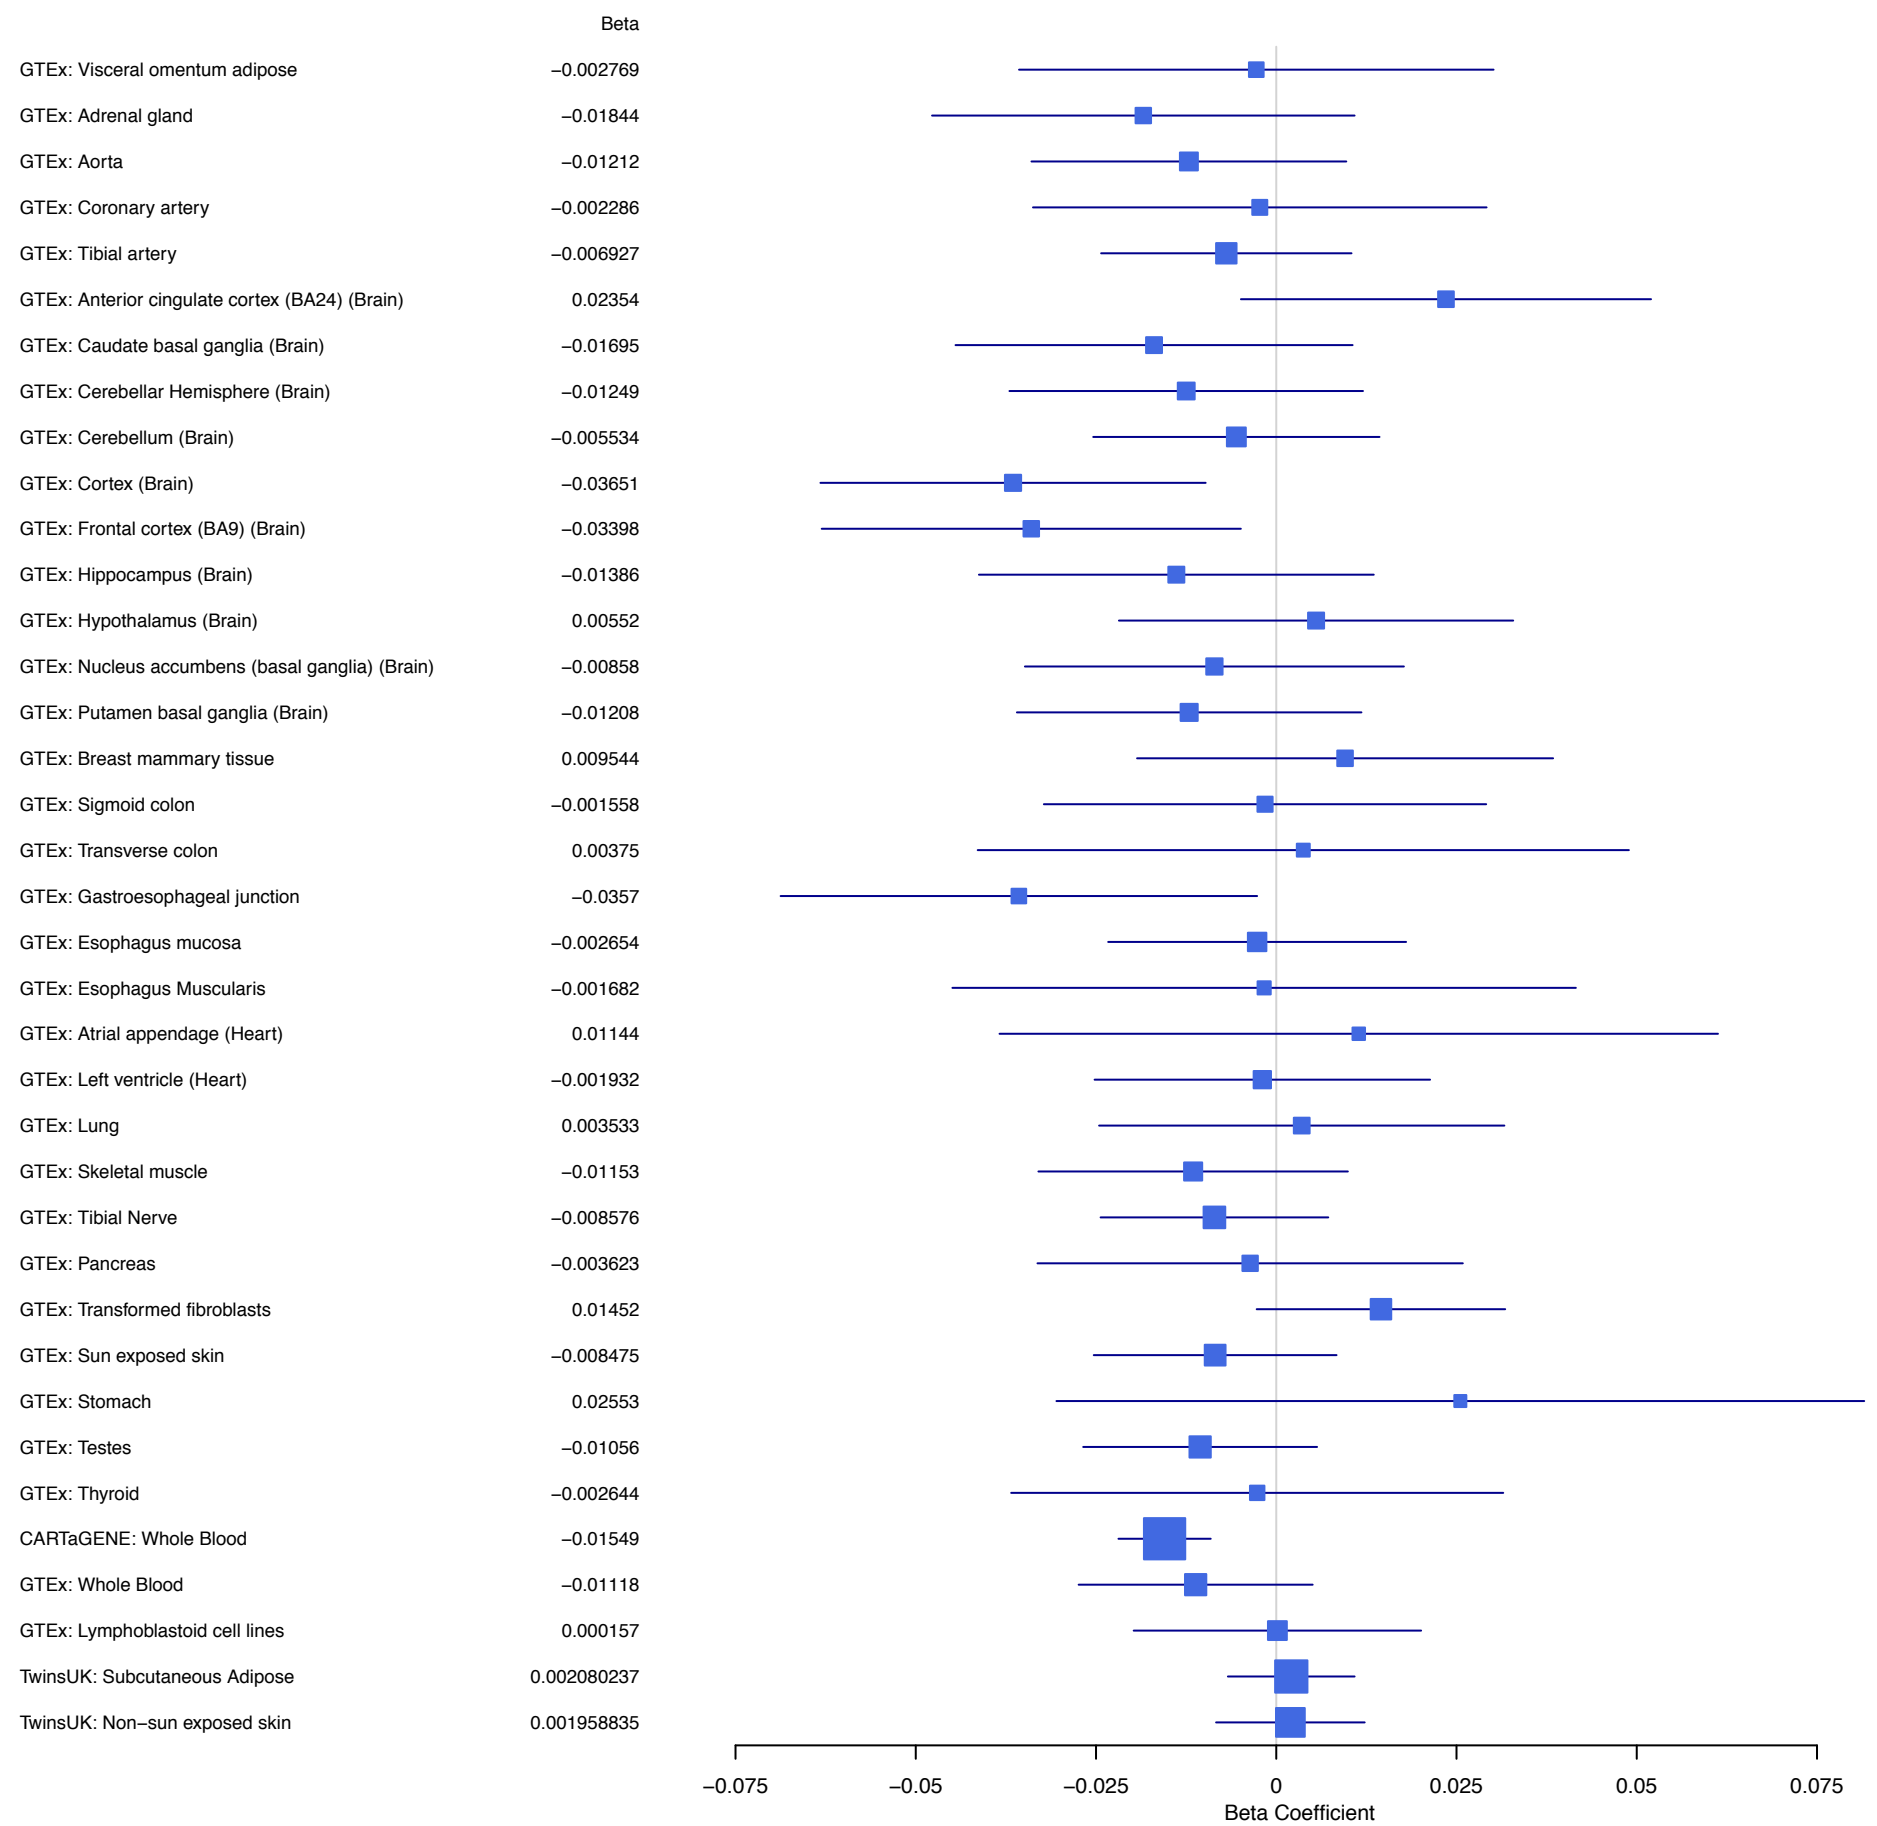

## rs10172506 : MTND5

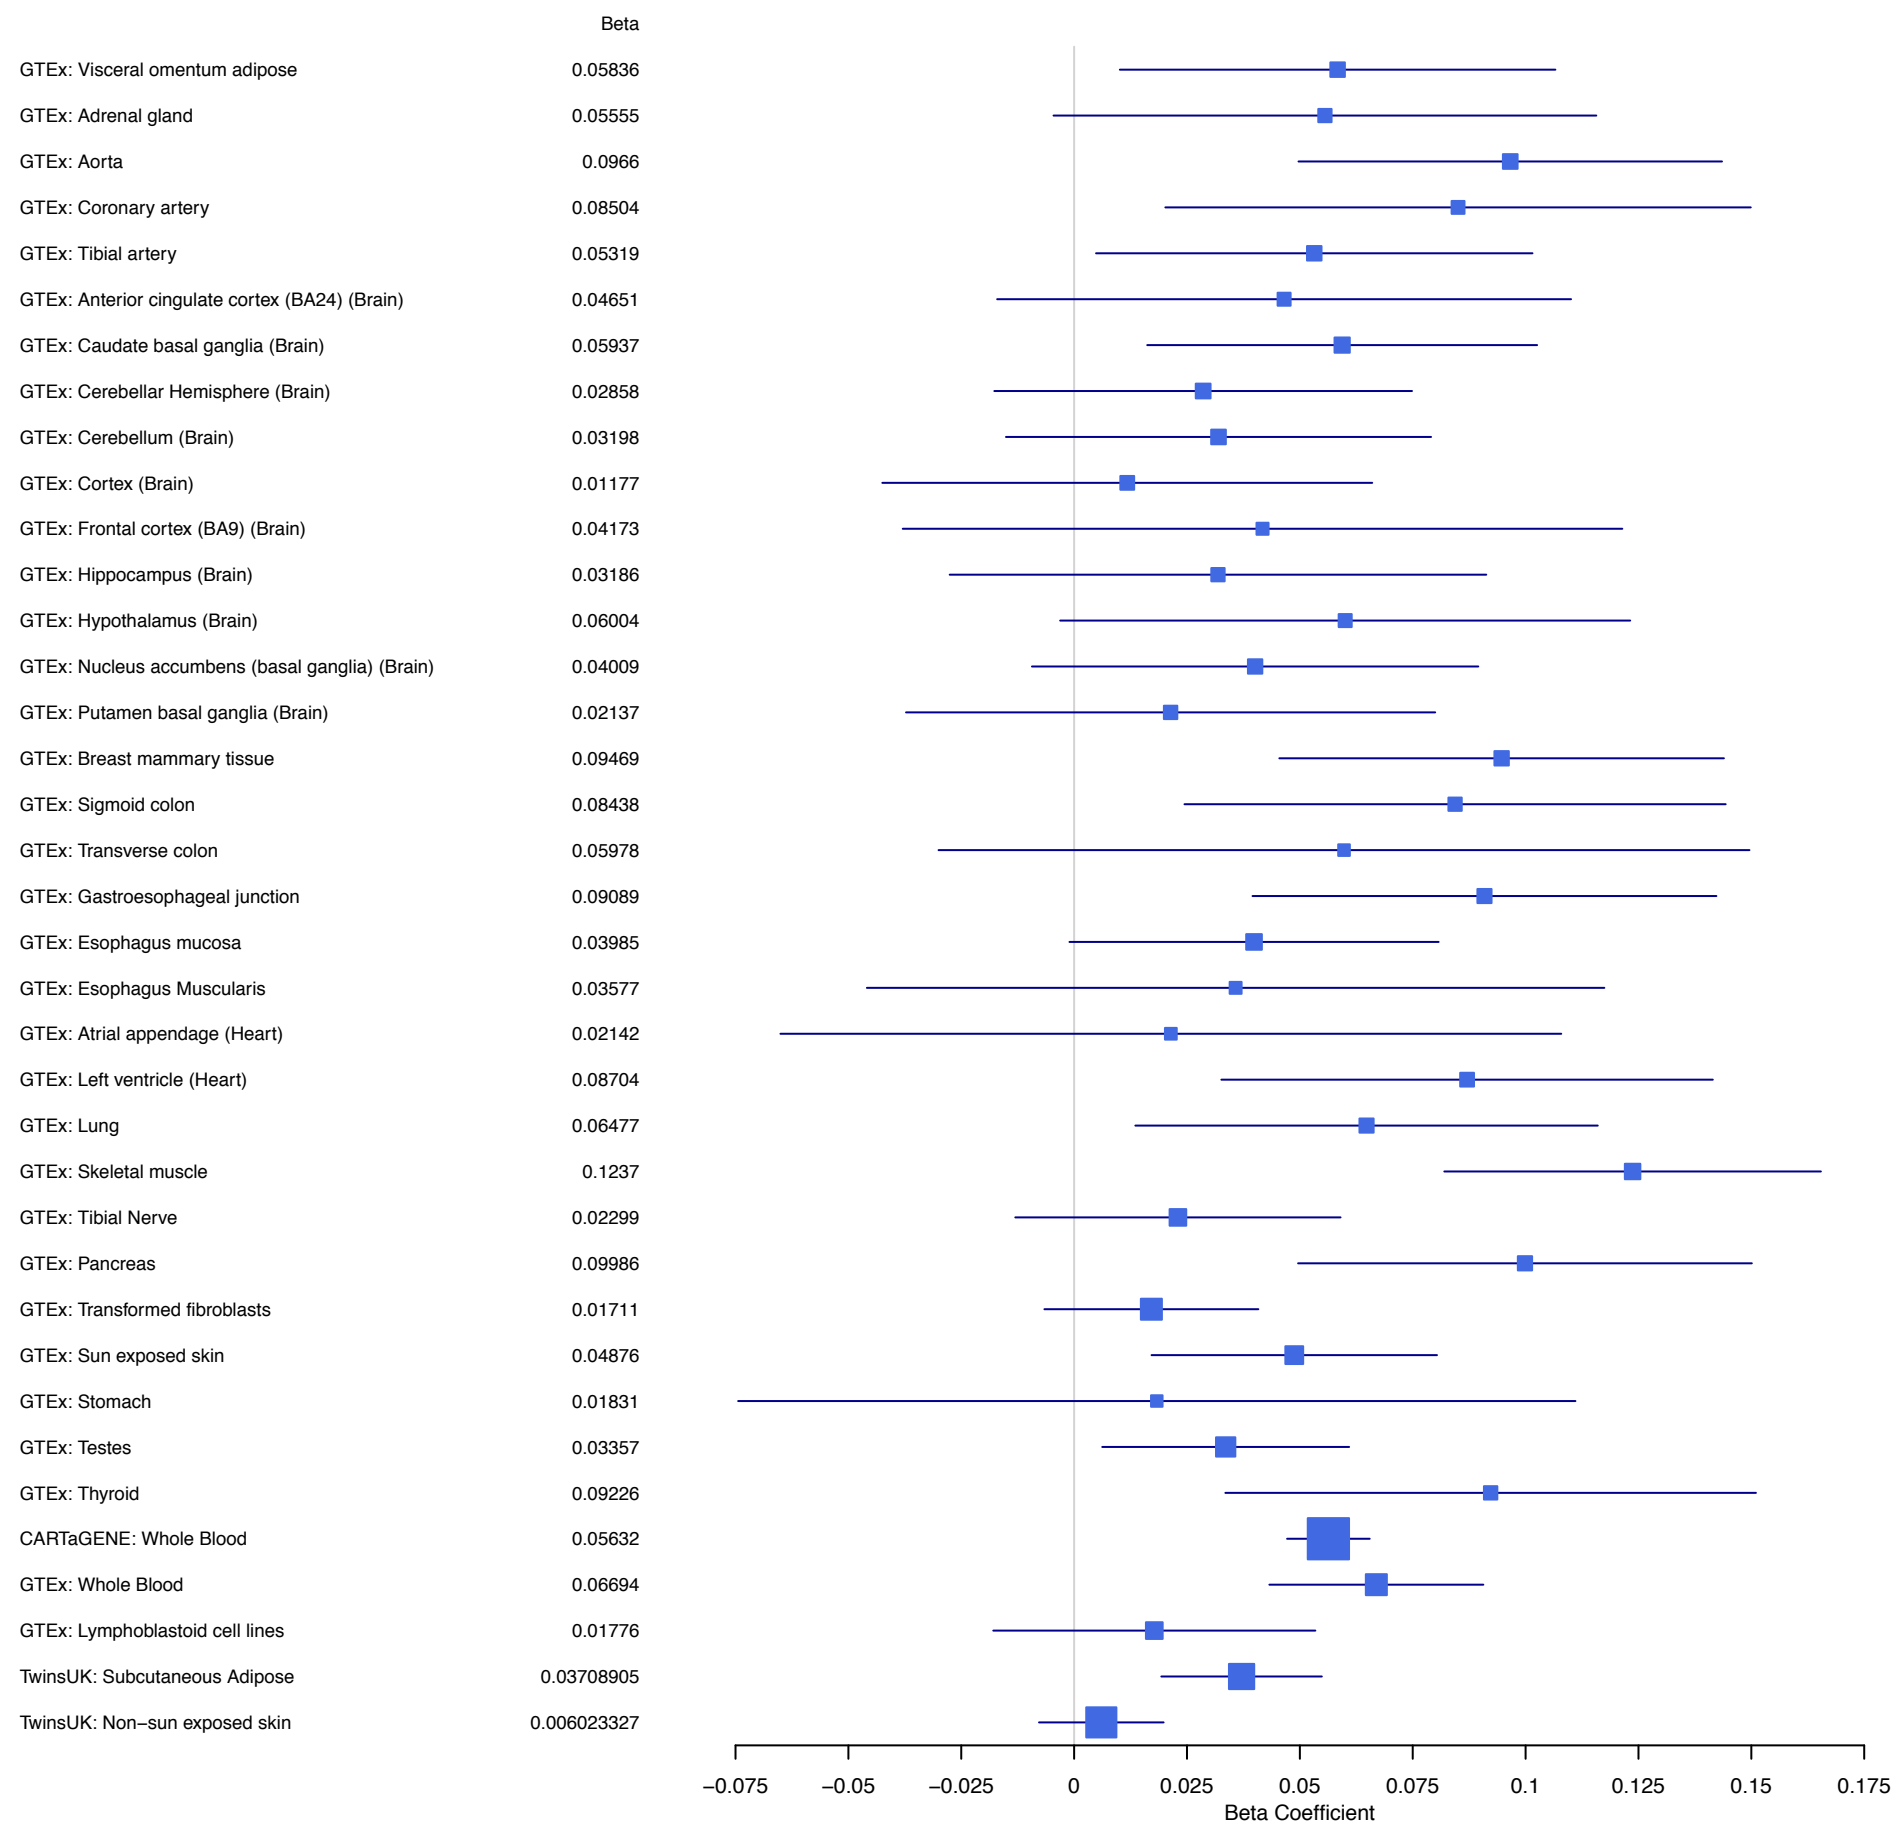

## rs10205130 : MTND1

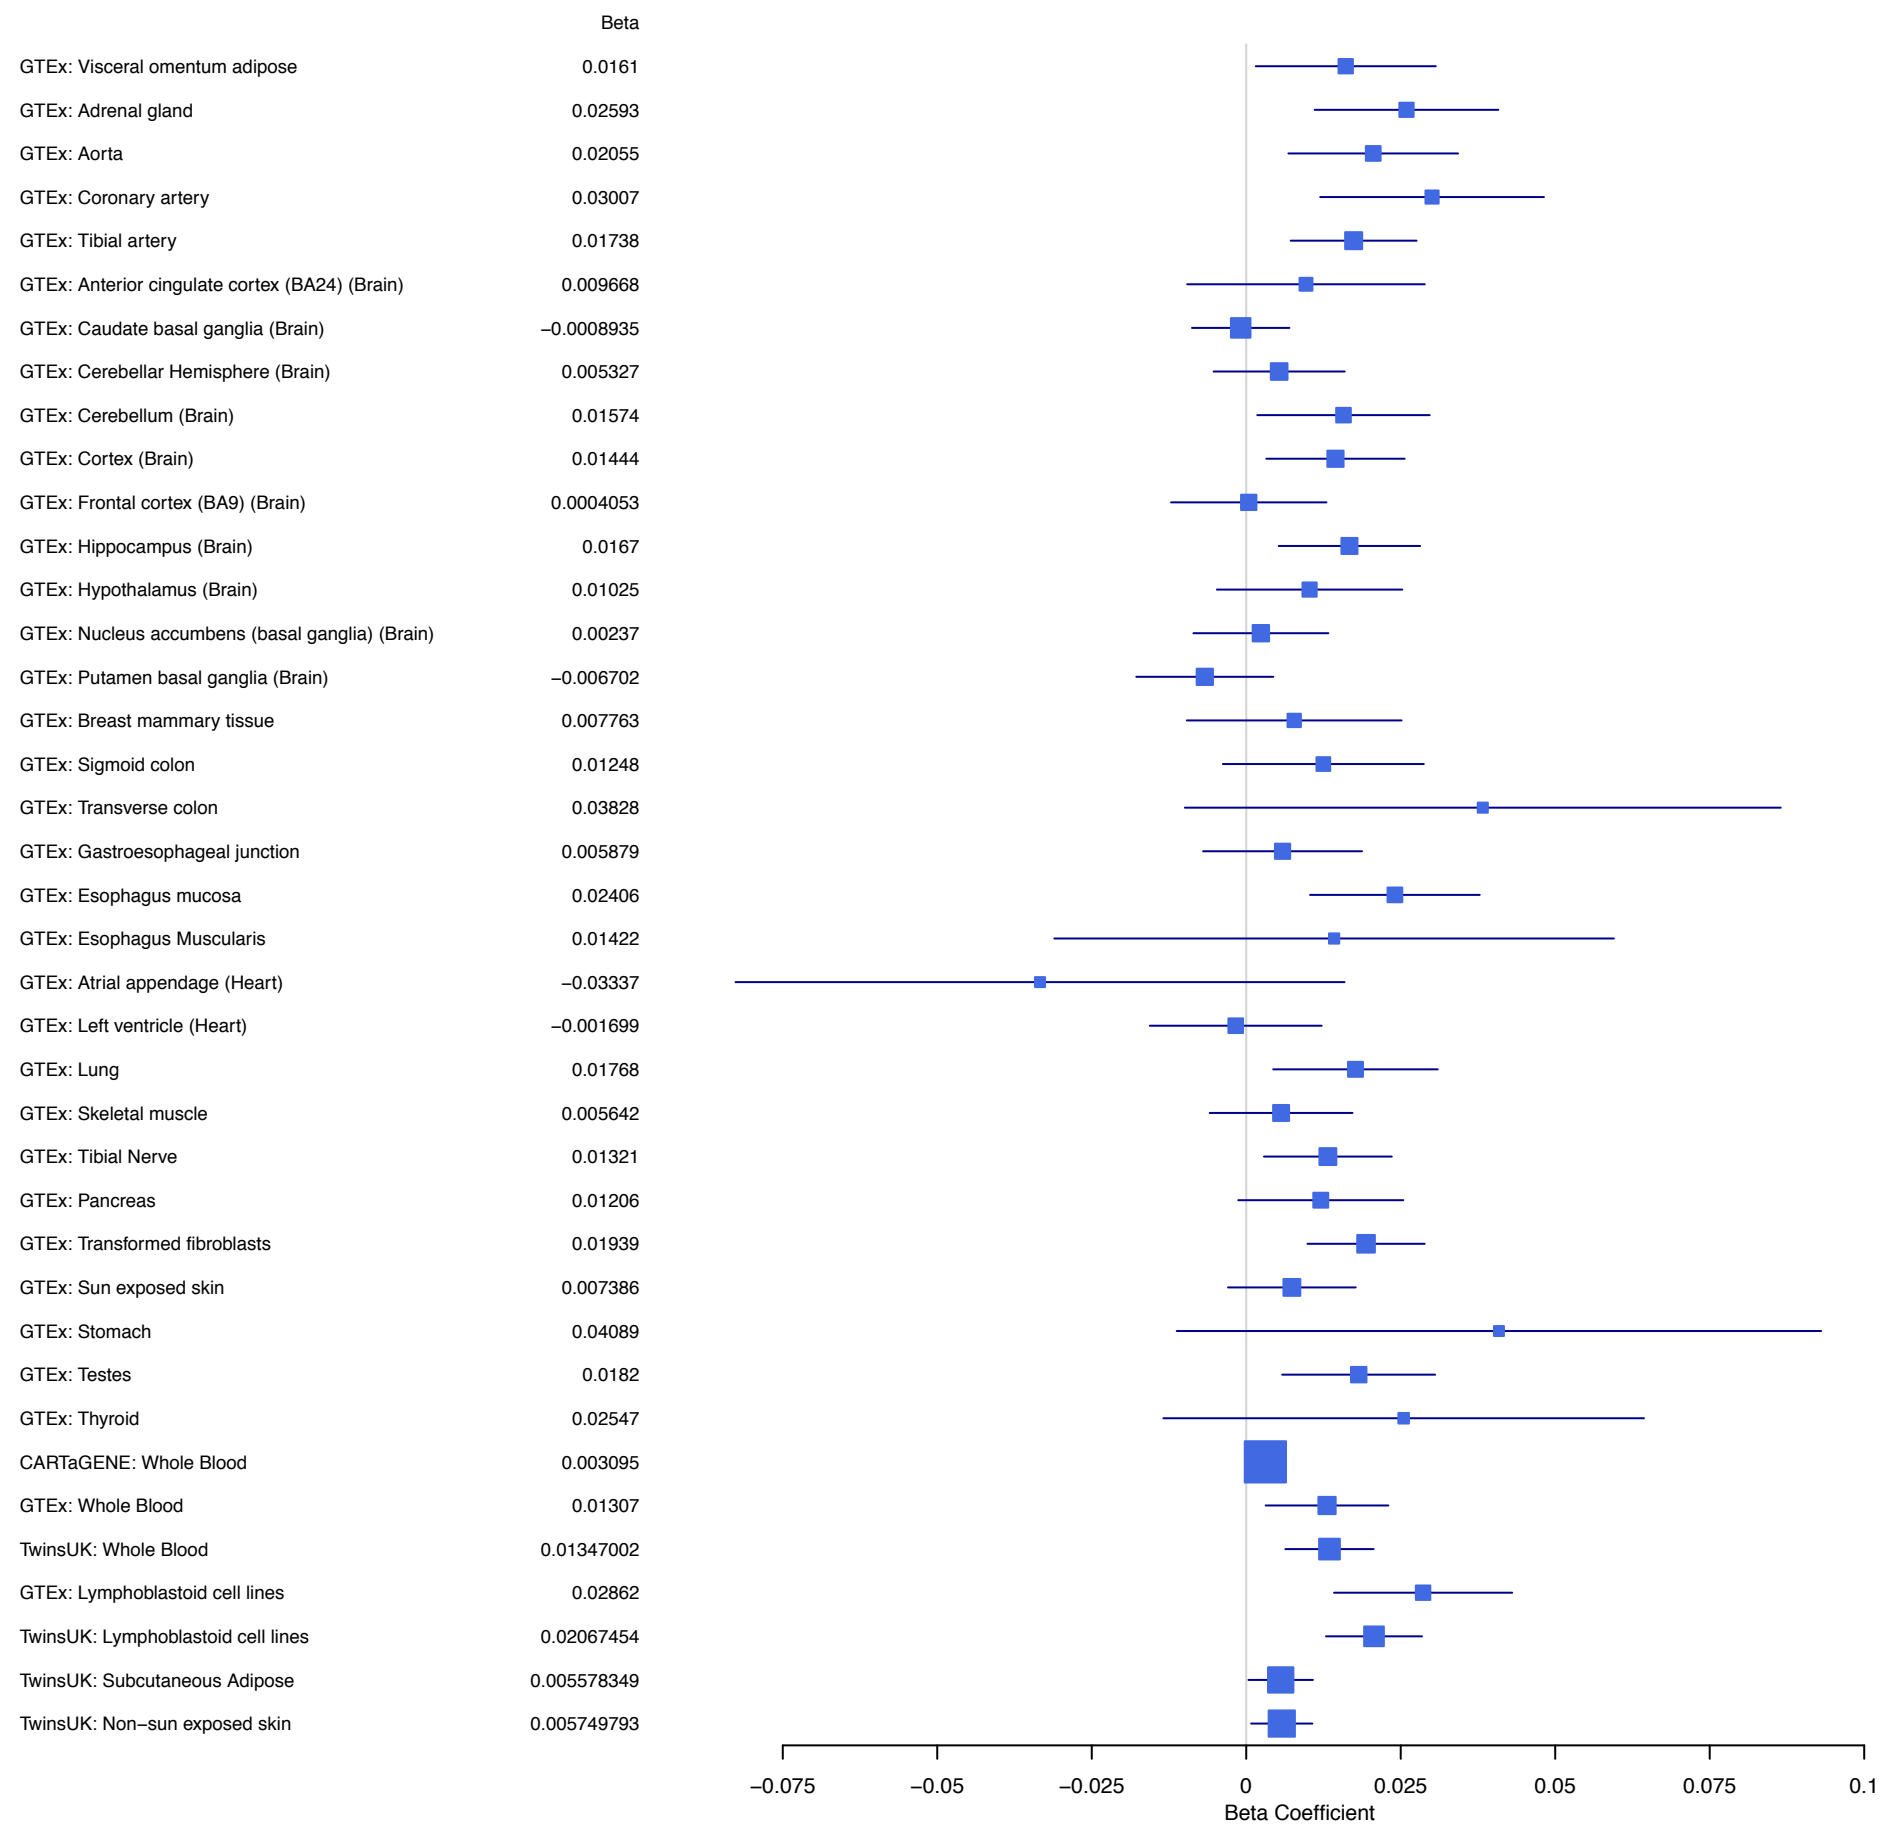

## rs10788883 : MTND4L

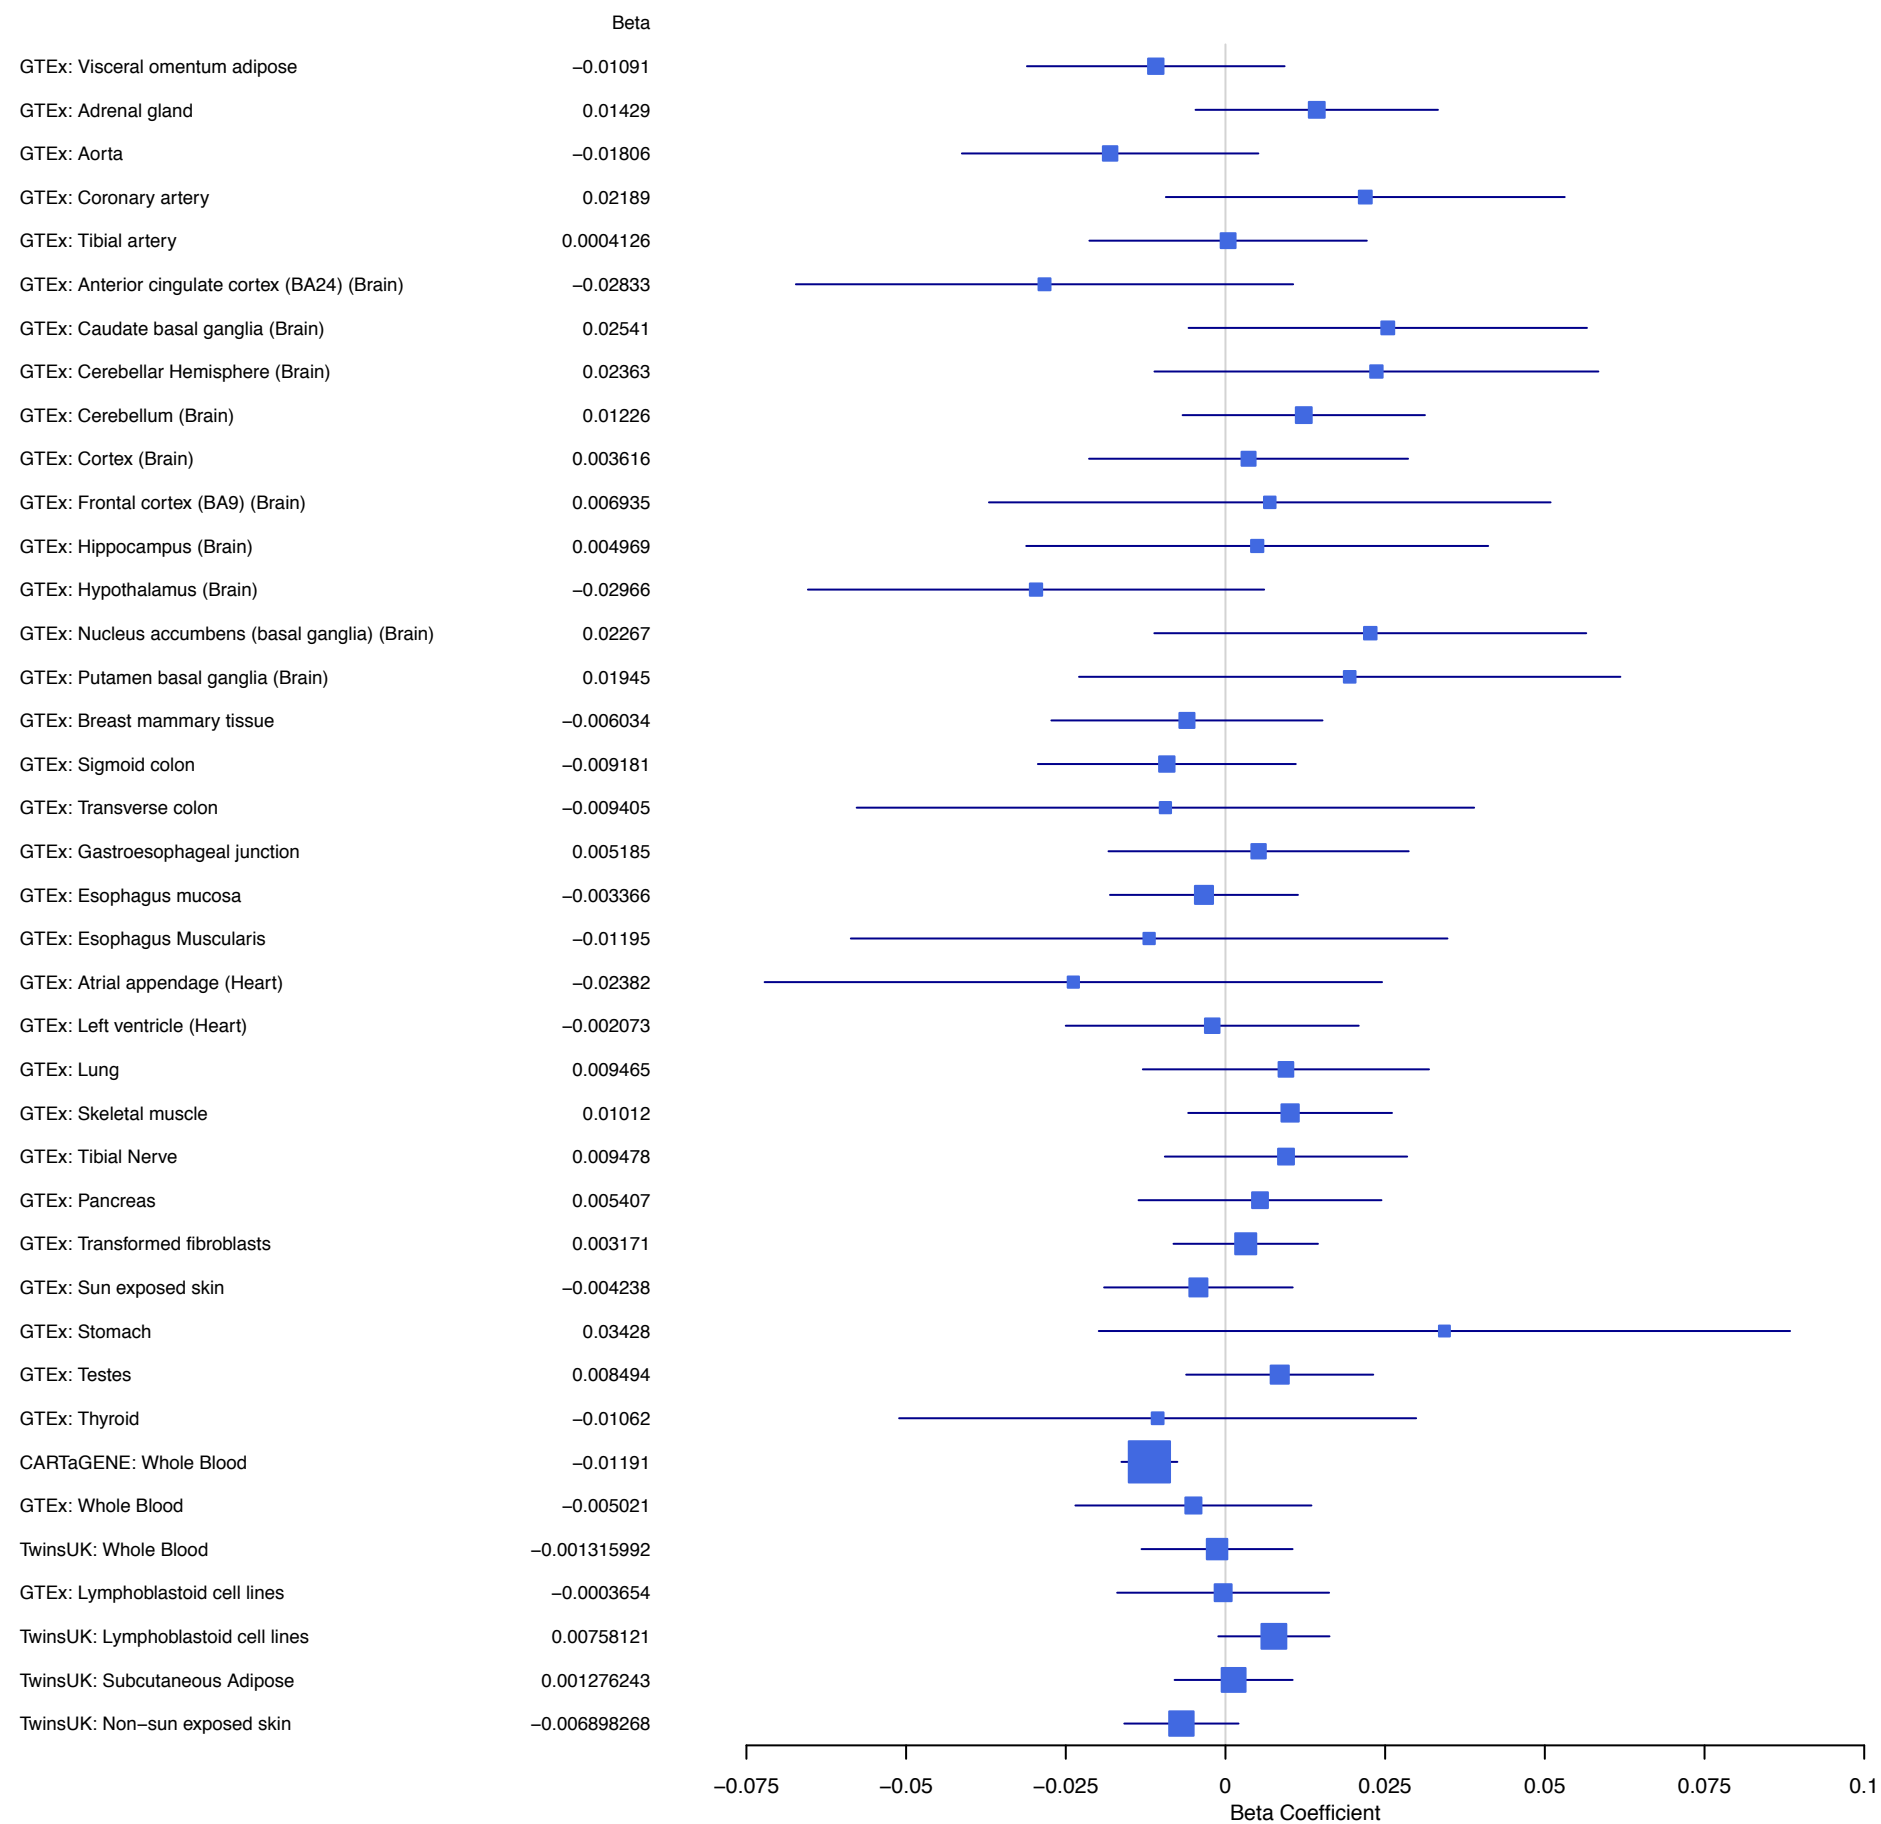

## rs11008009 : MTND4

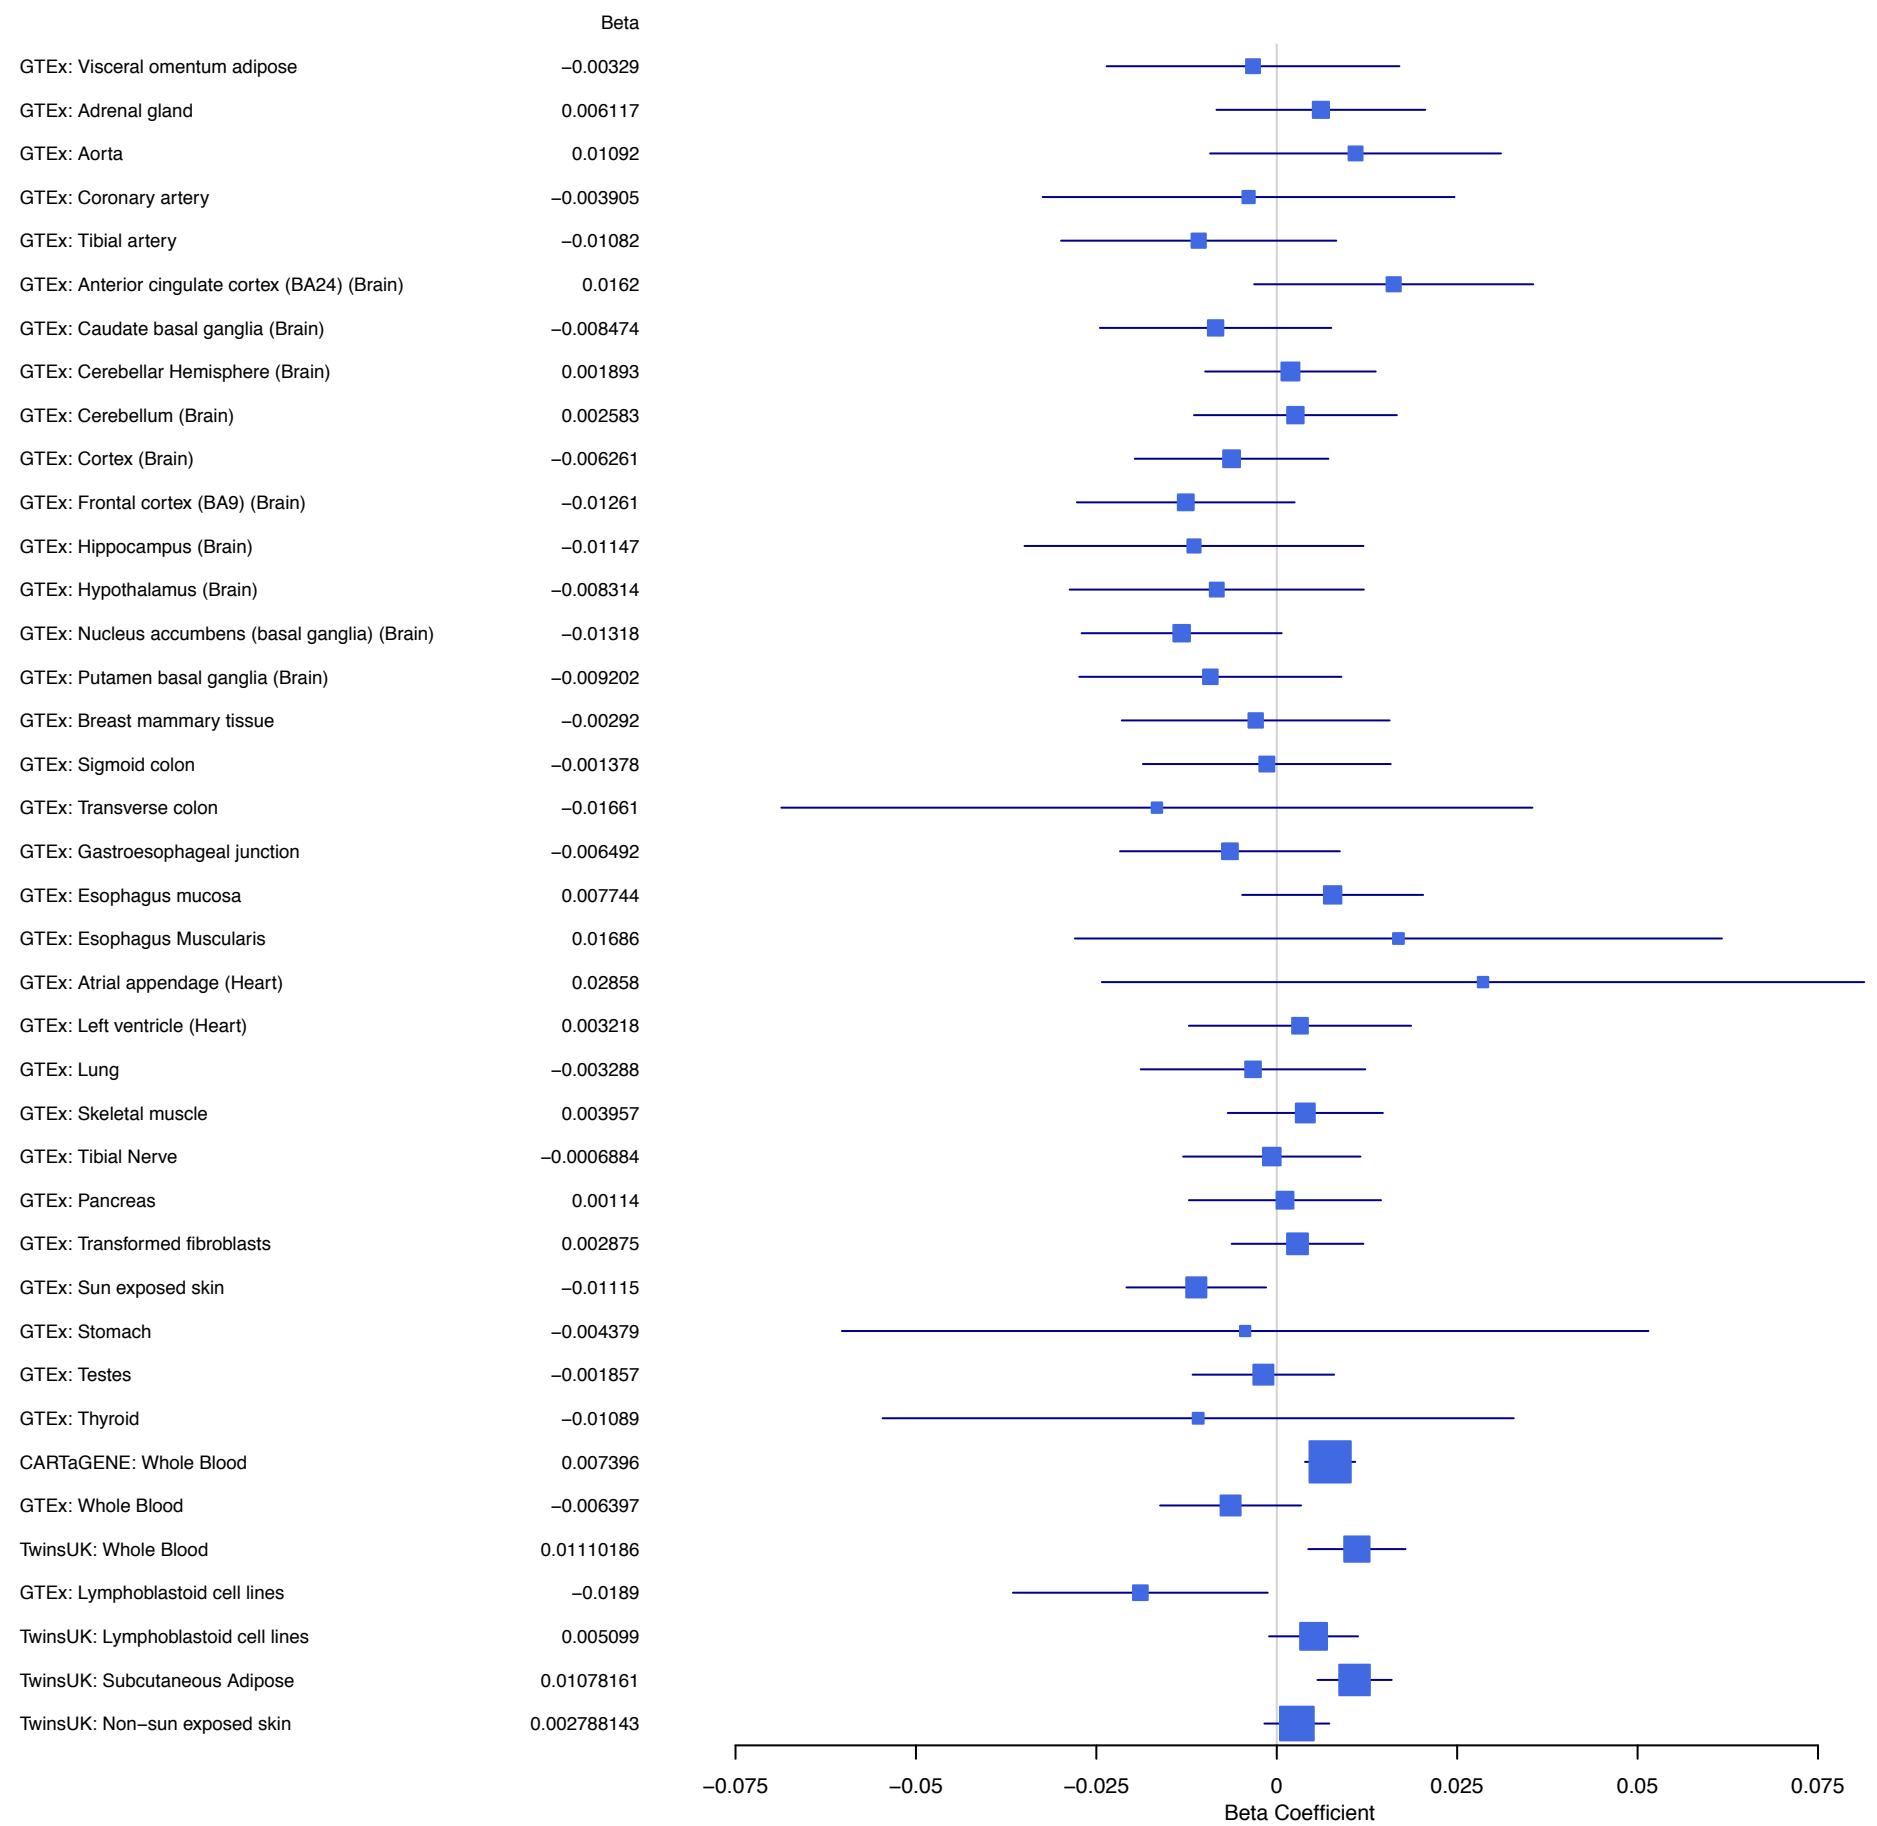

## rs11049103 : MTND1

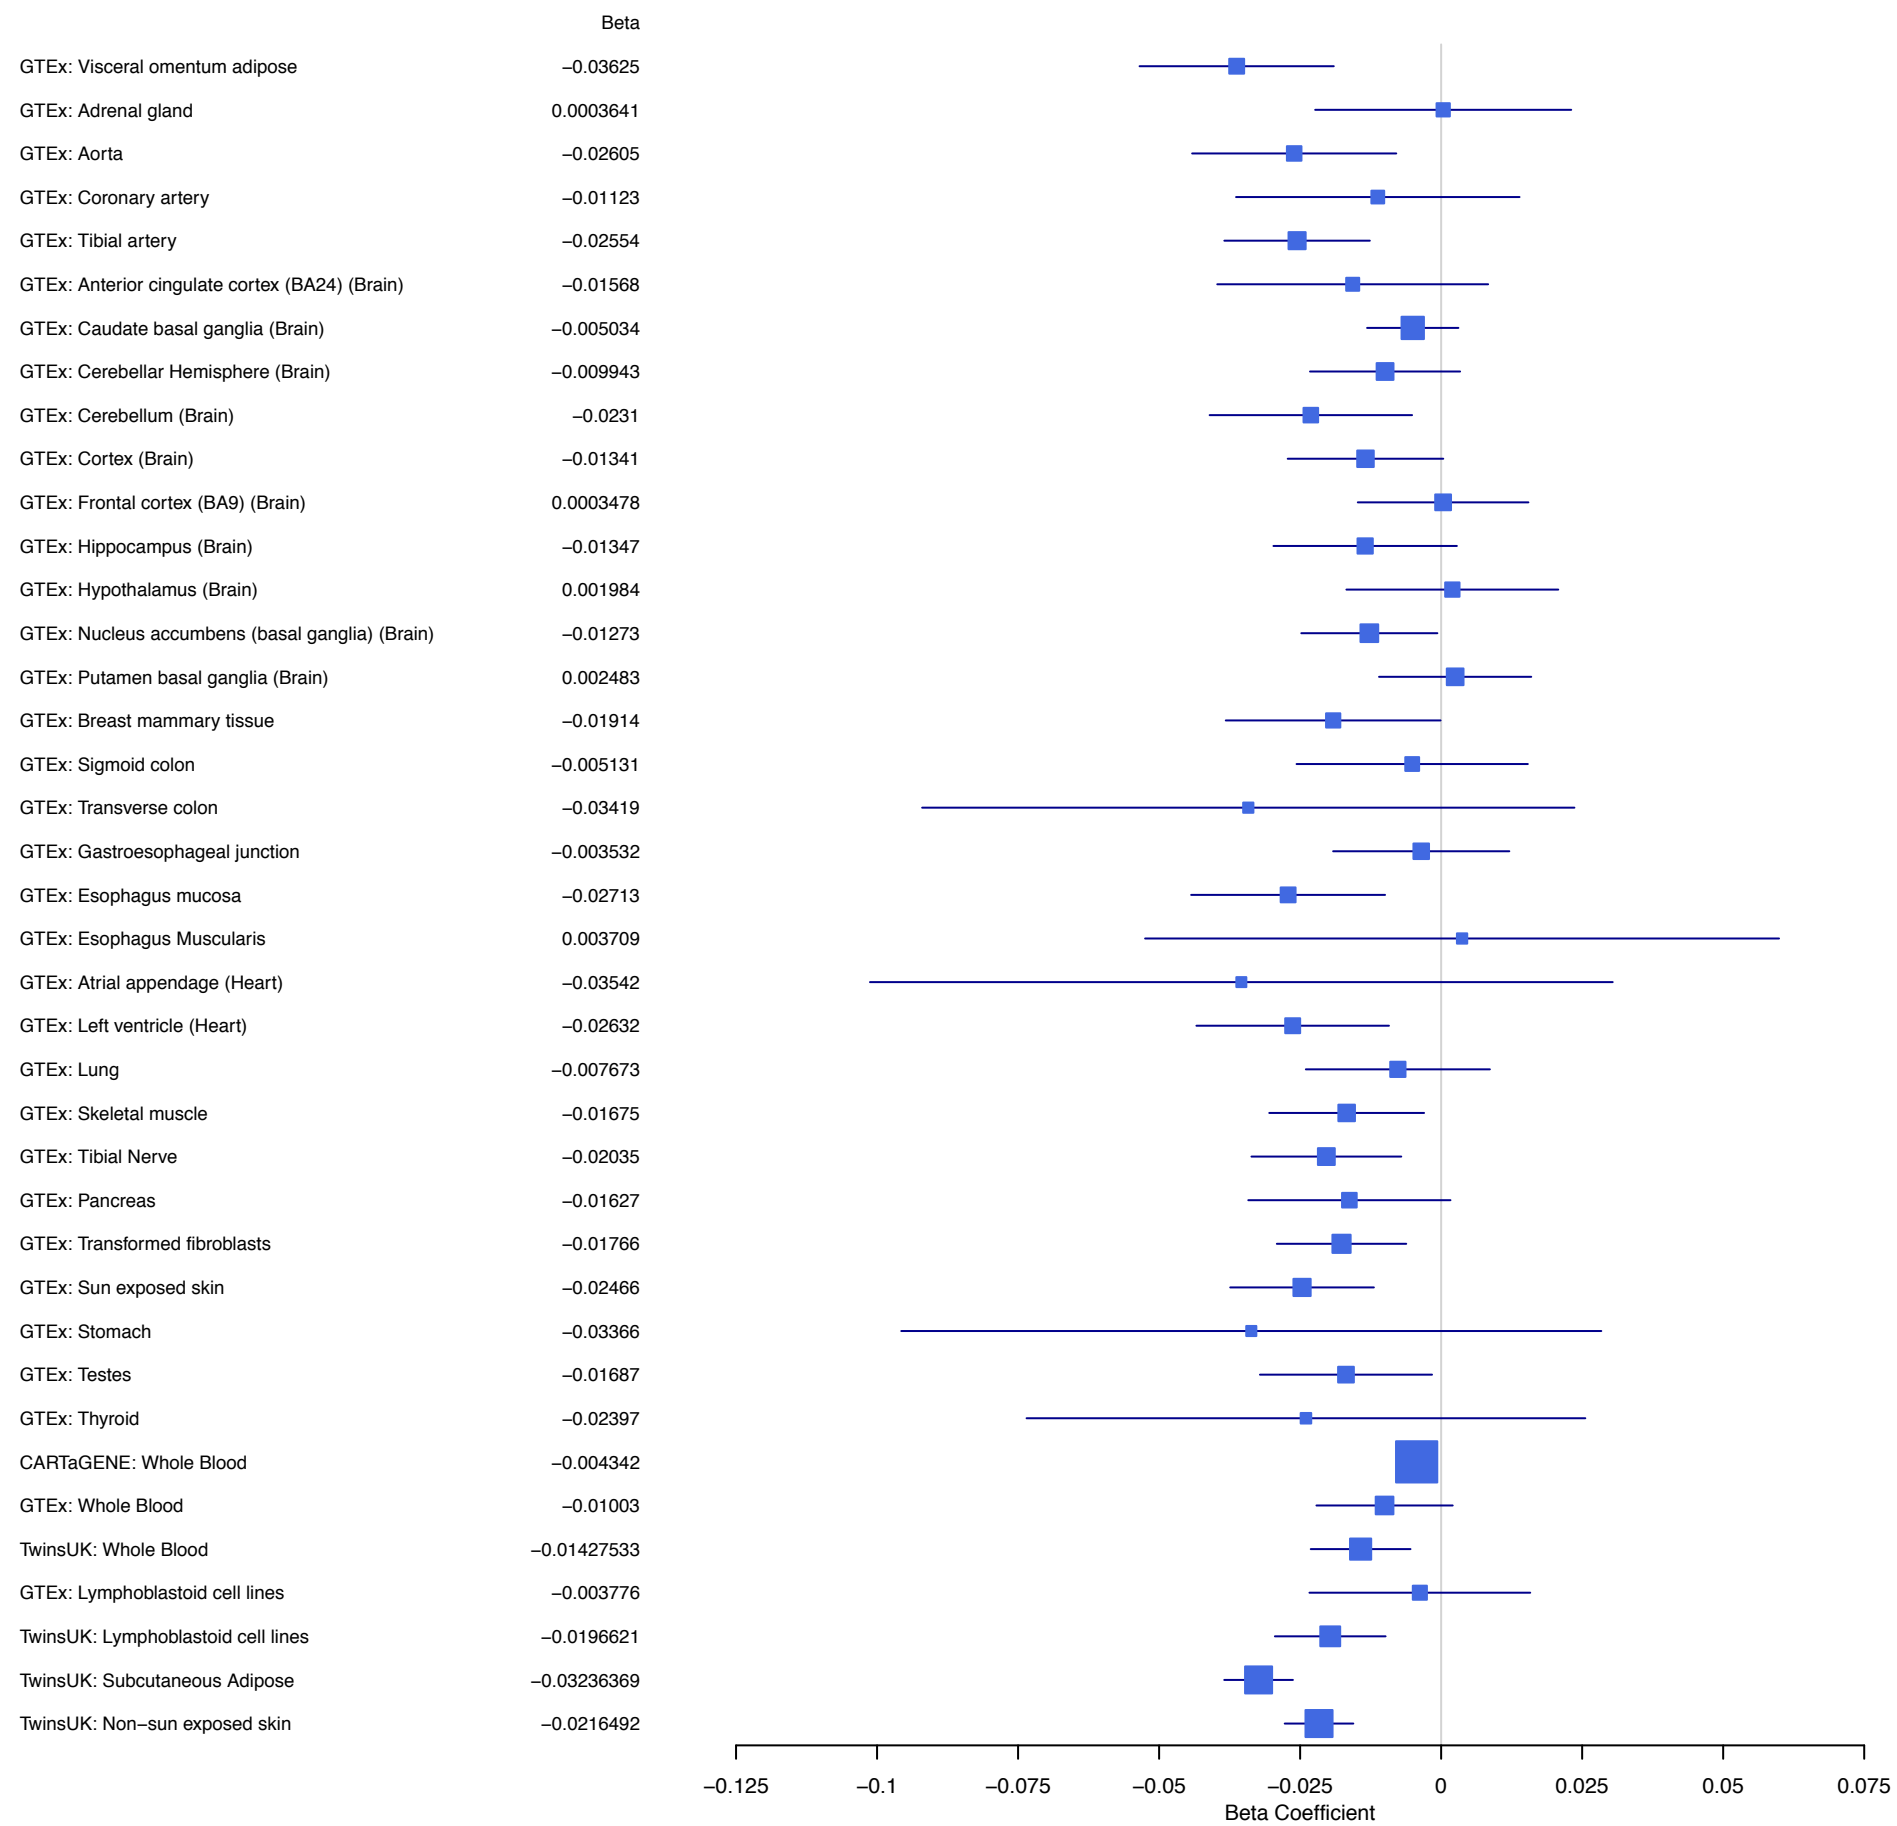

## rs11049112 : MTATP6

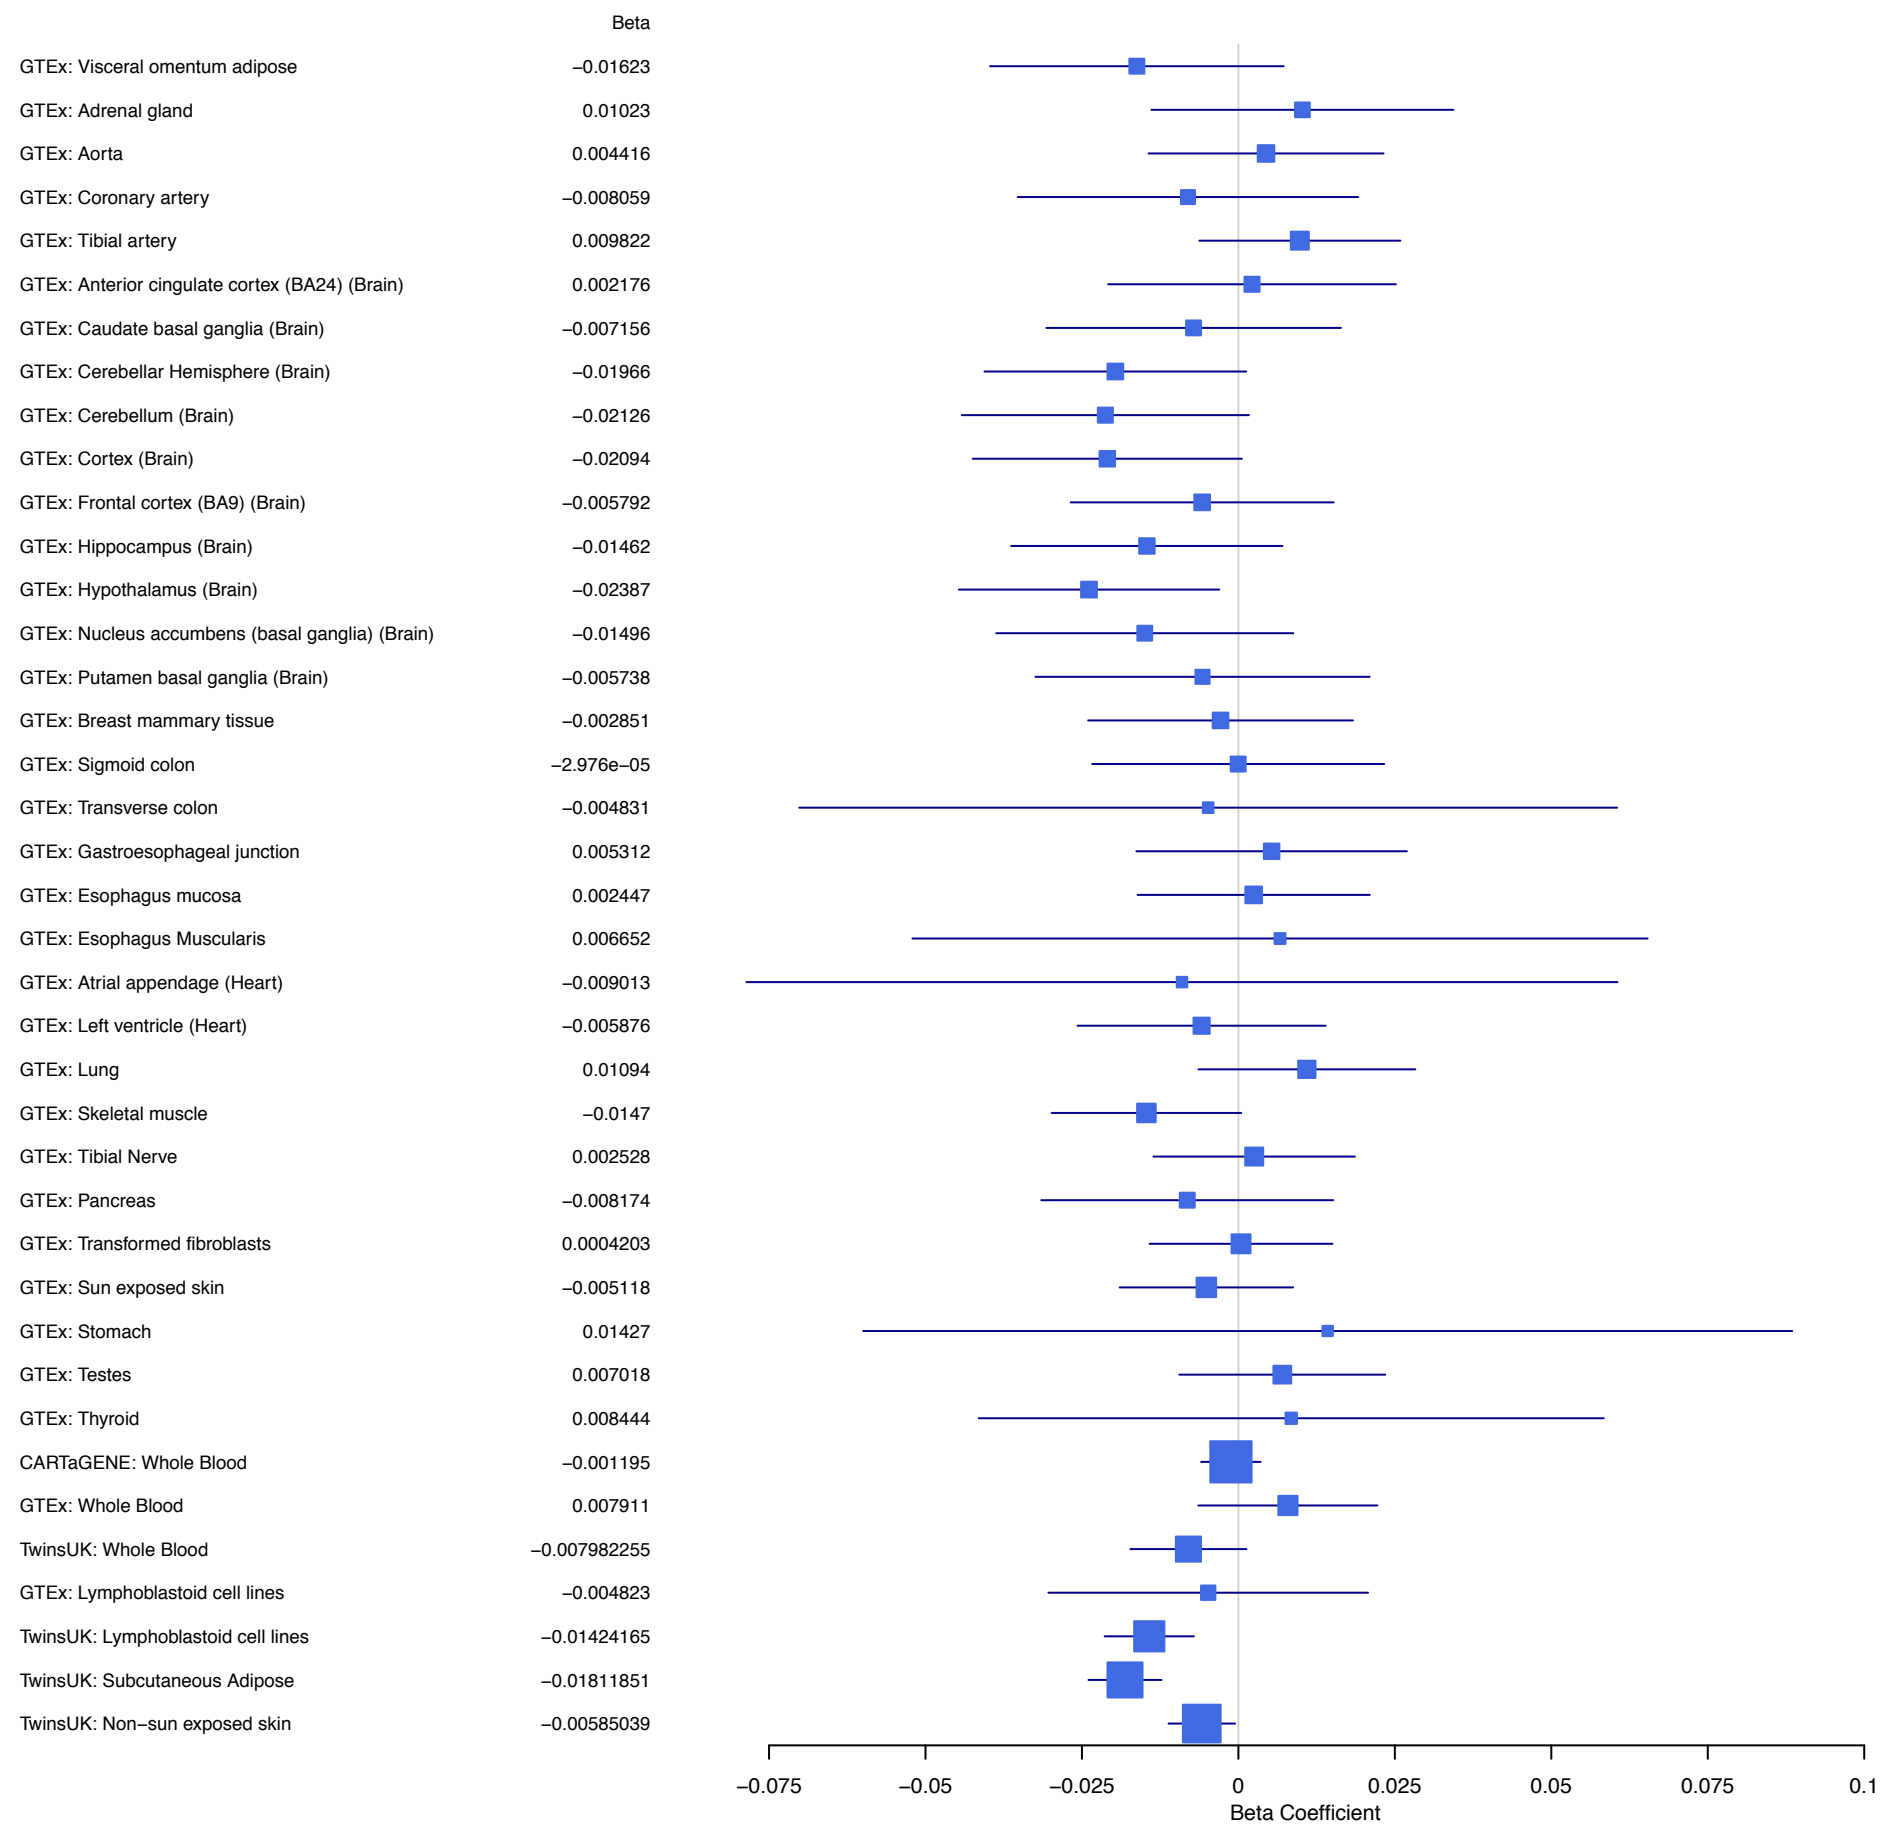

## rs11085147 : MTCO2

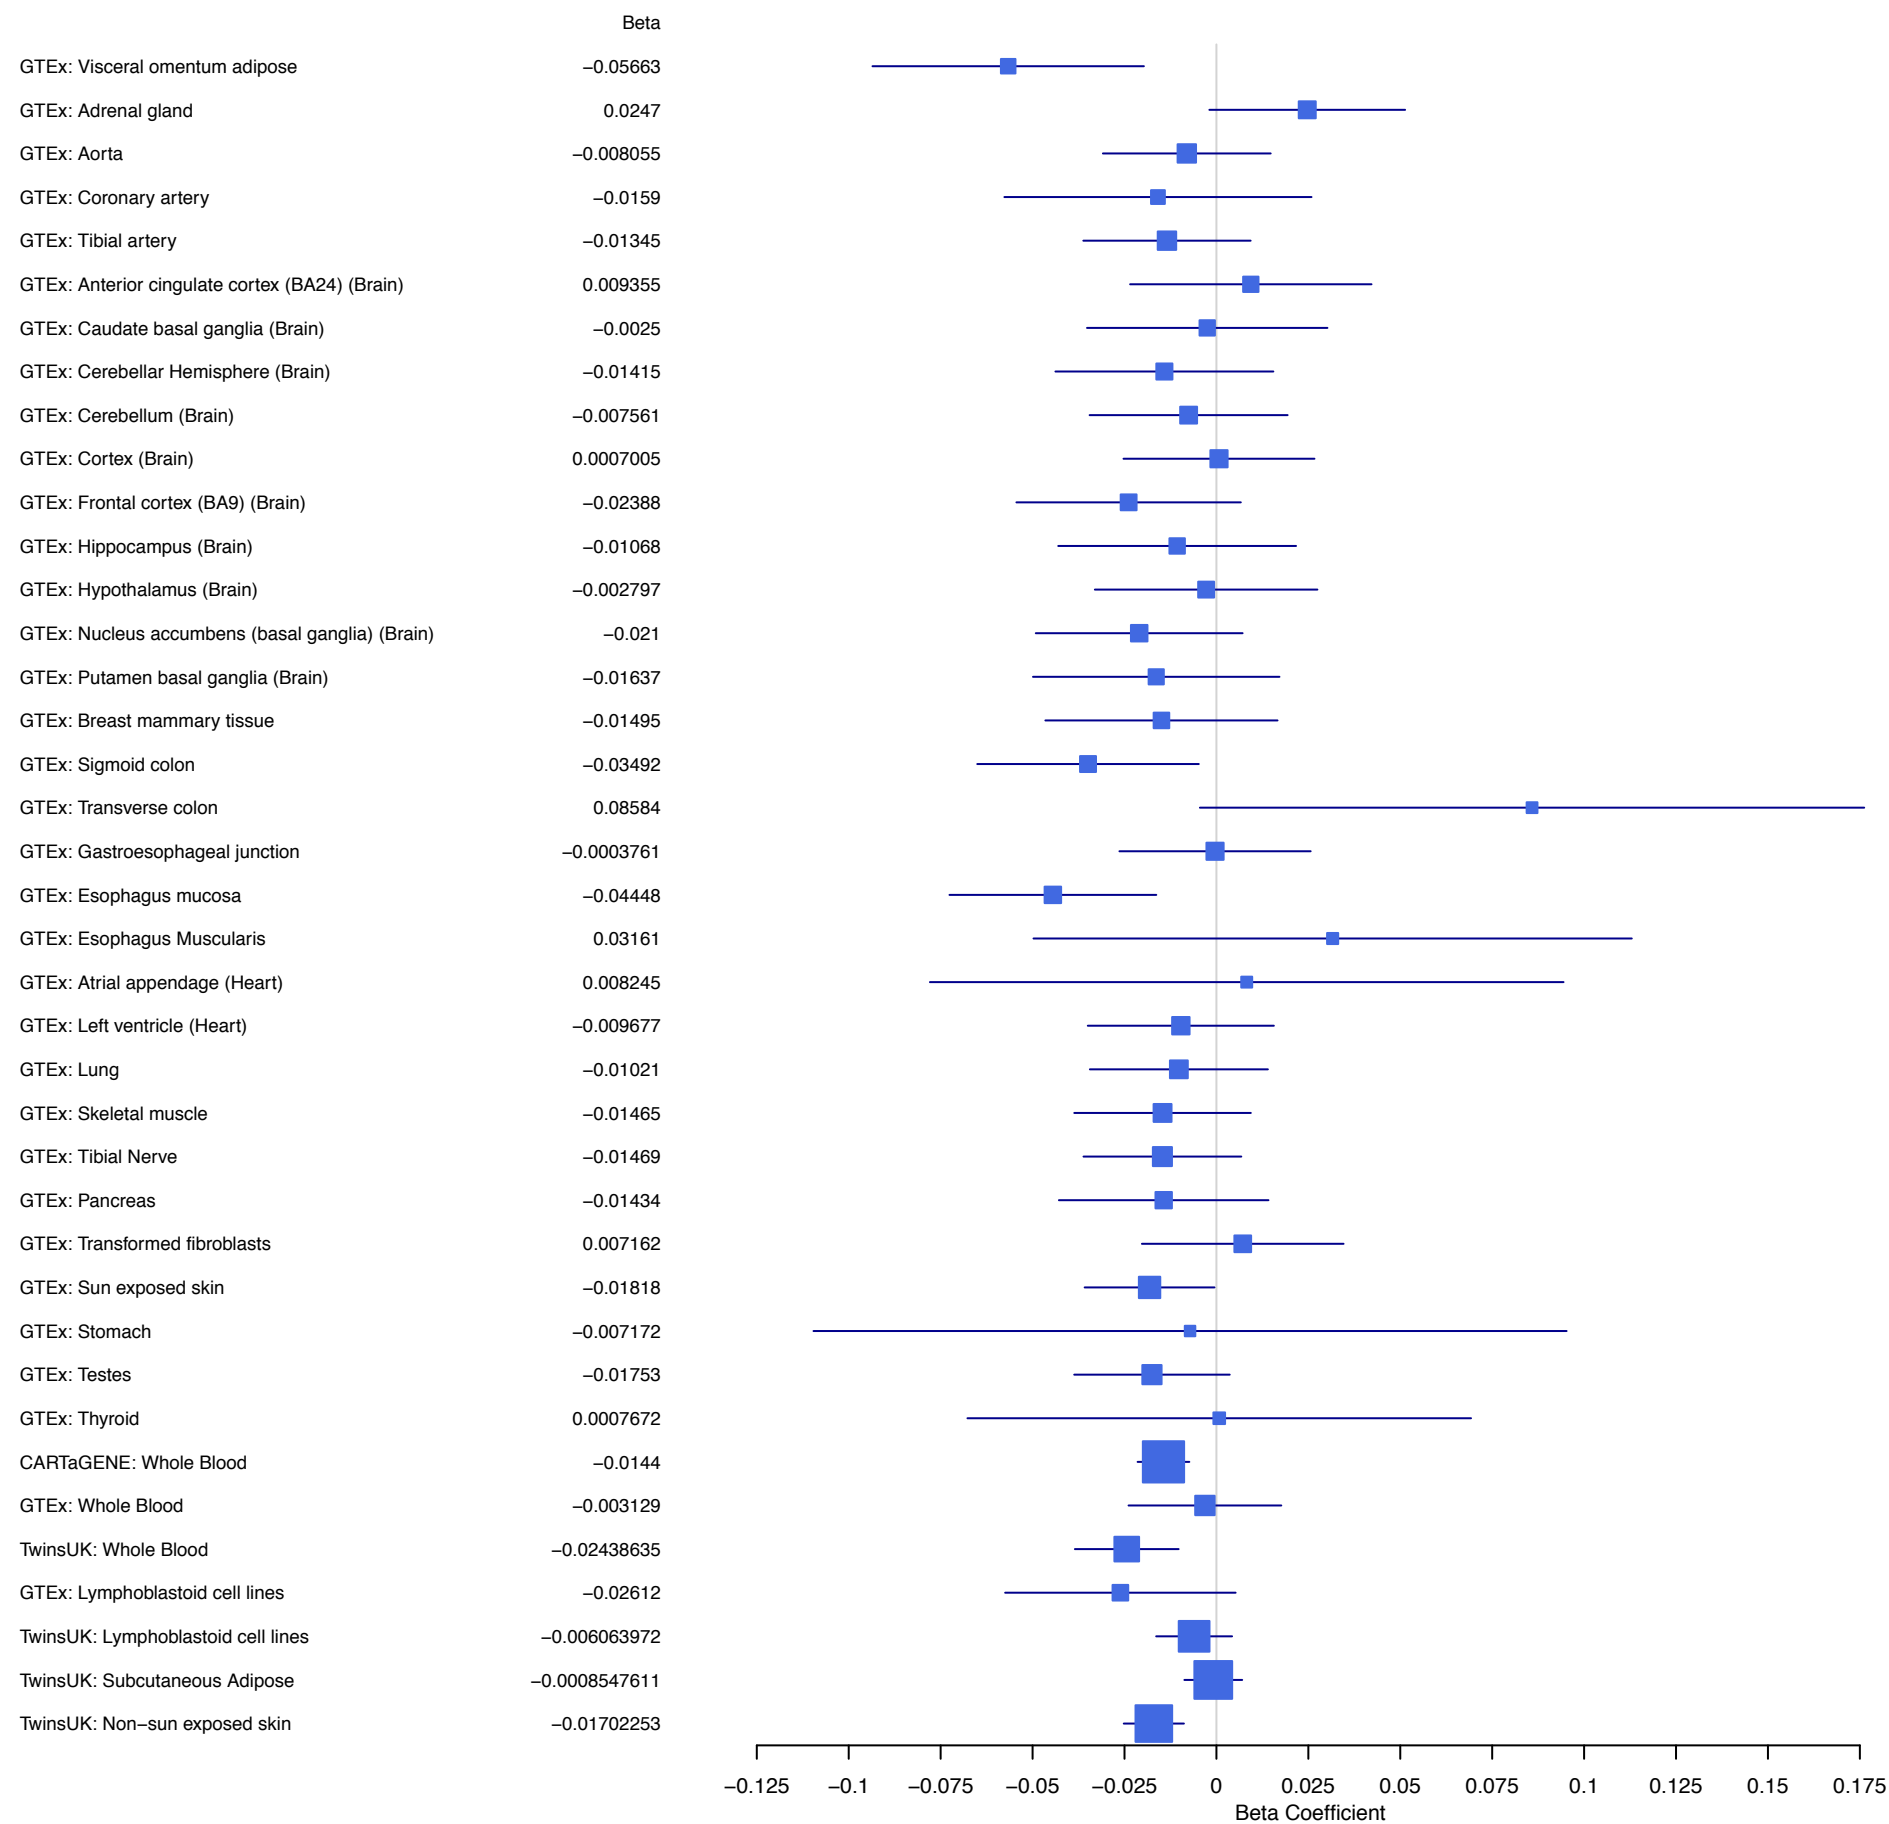

## rs12579998 : MTND1

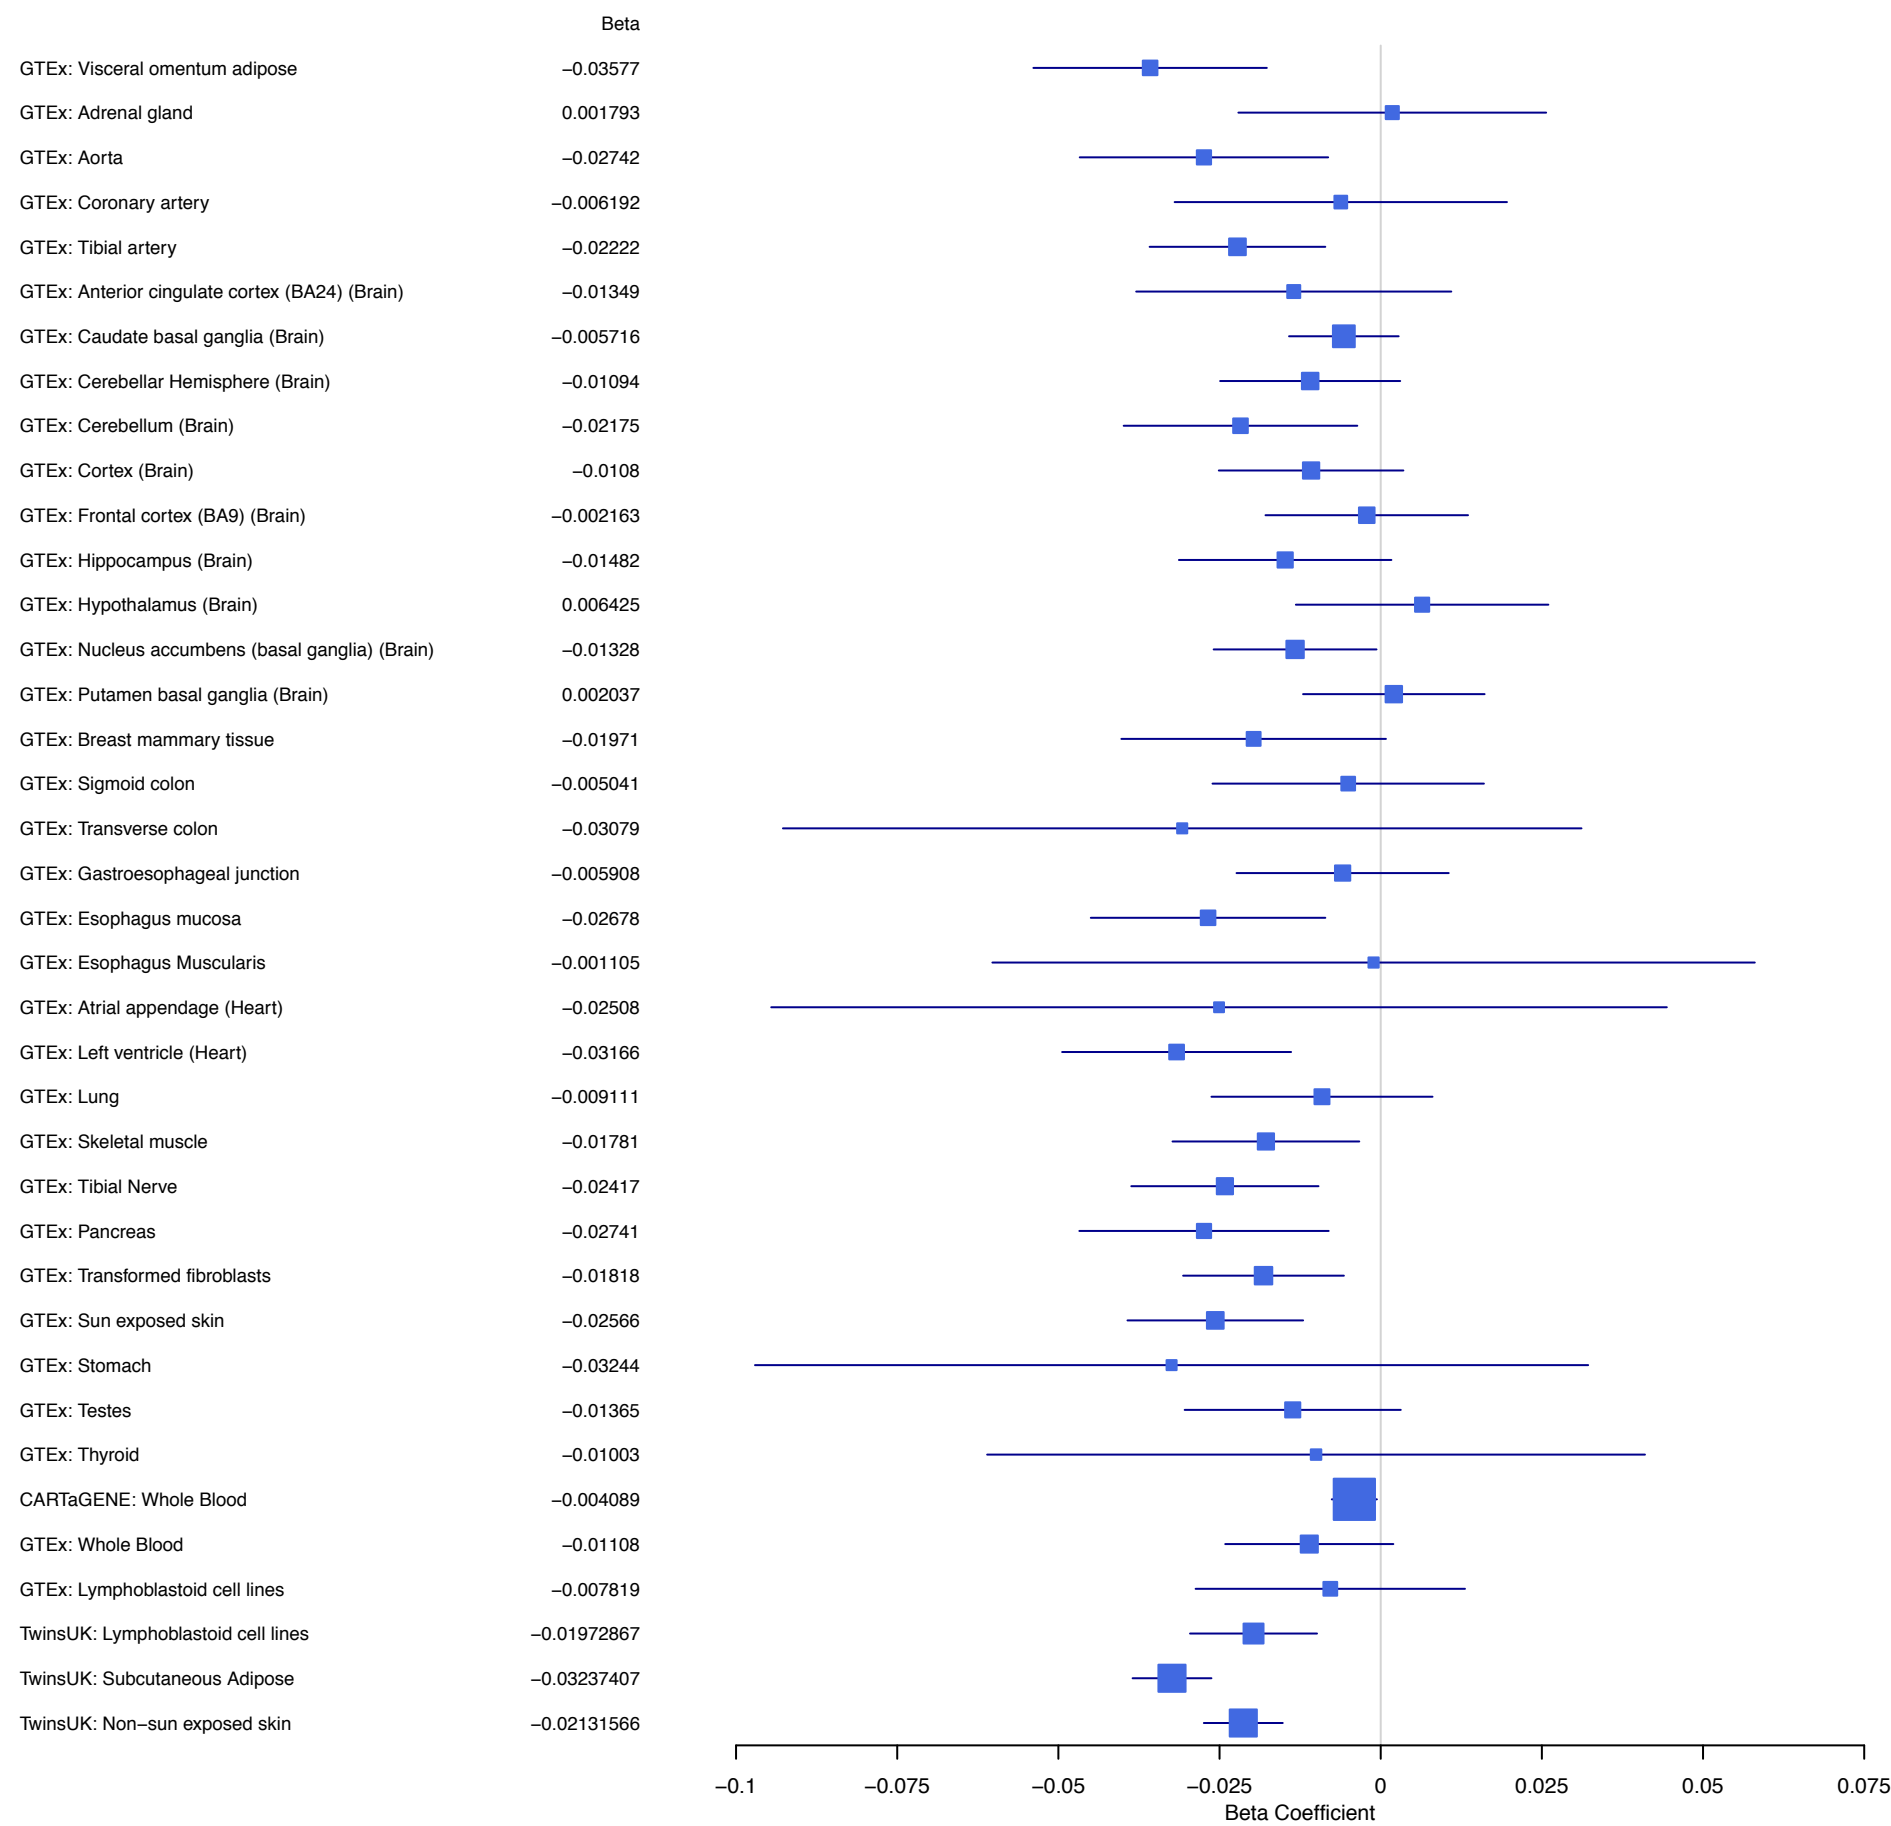

## rs12579998 : MTND4

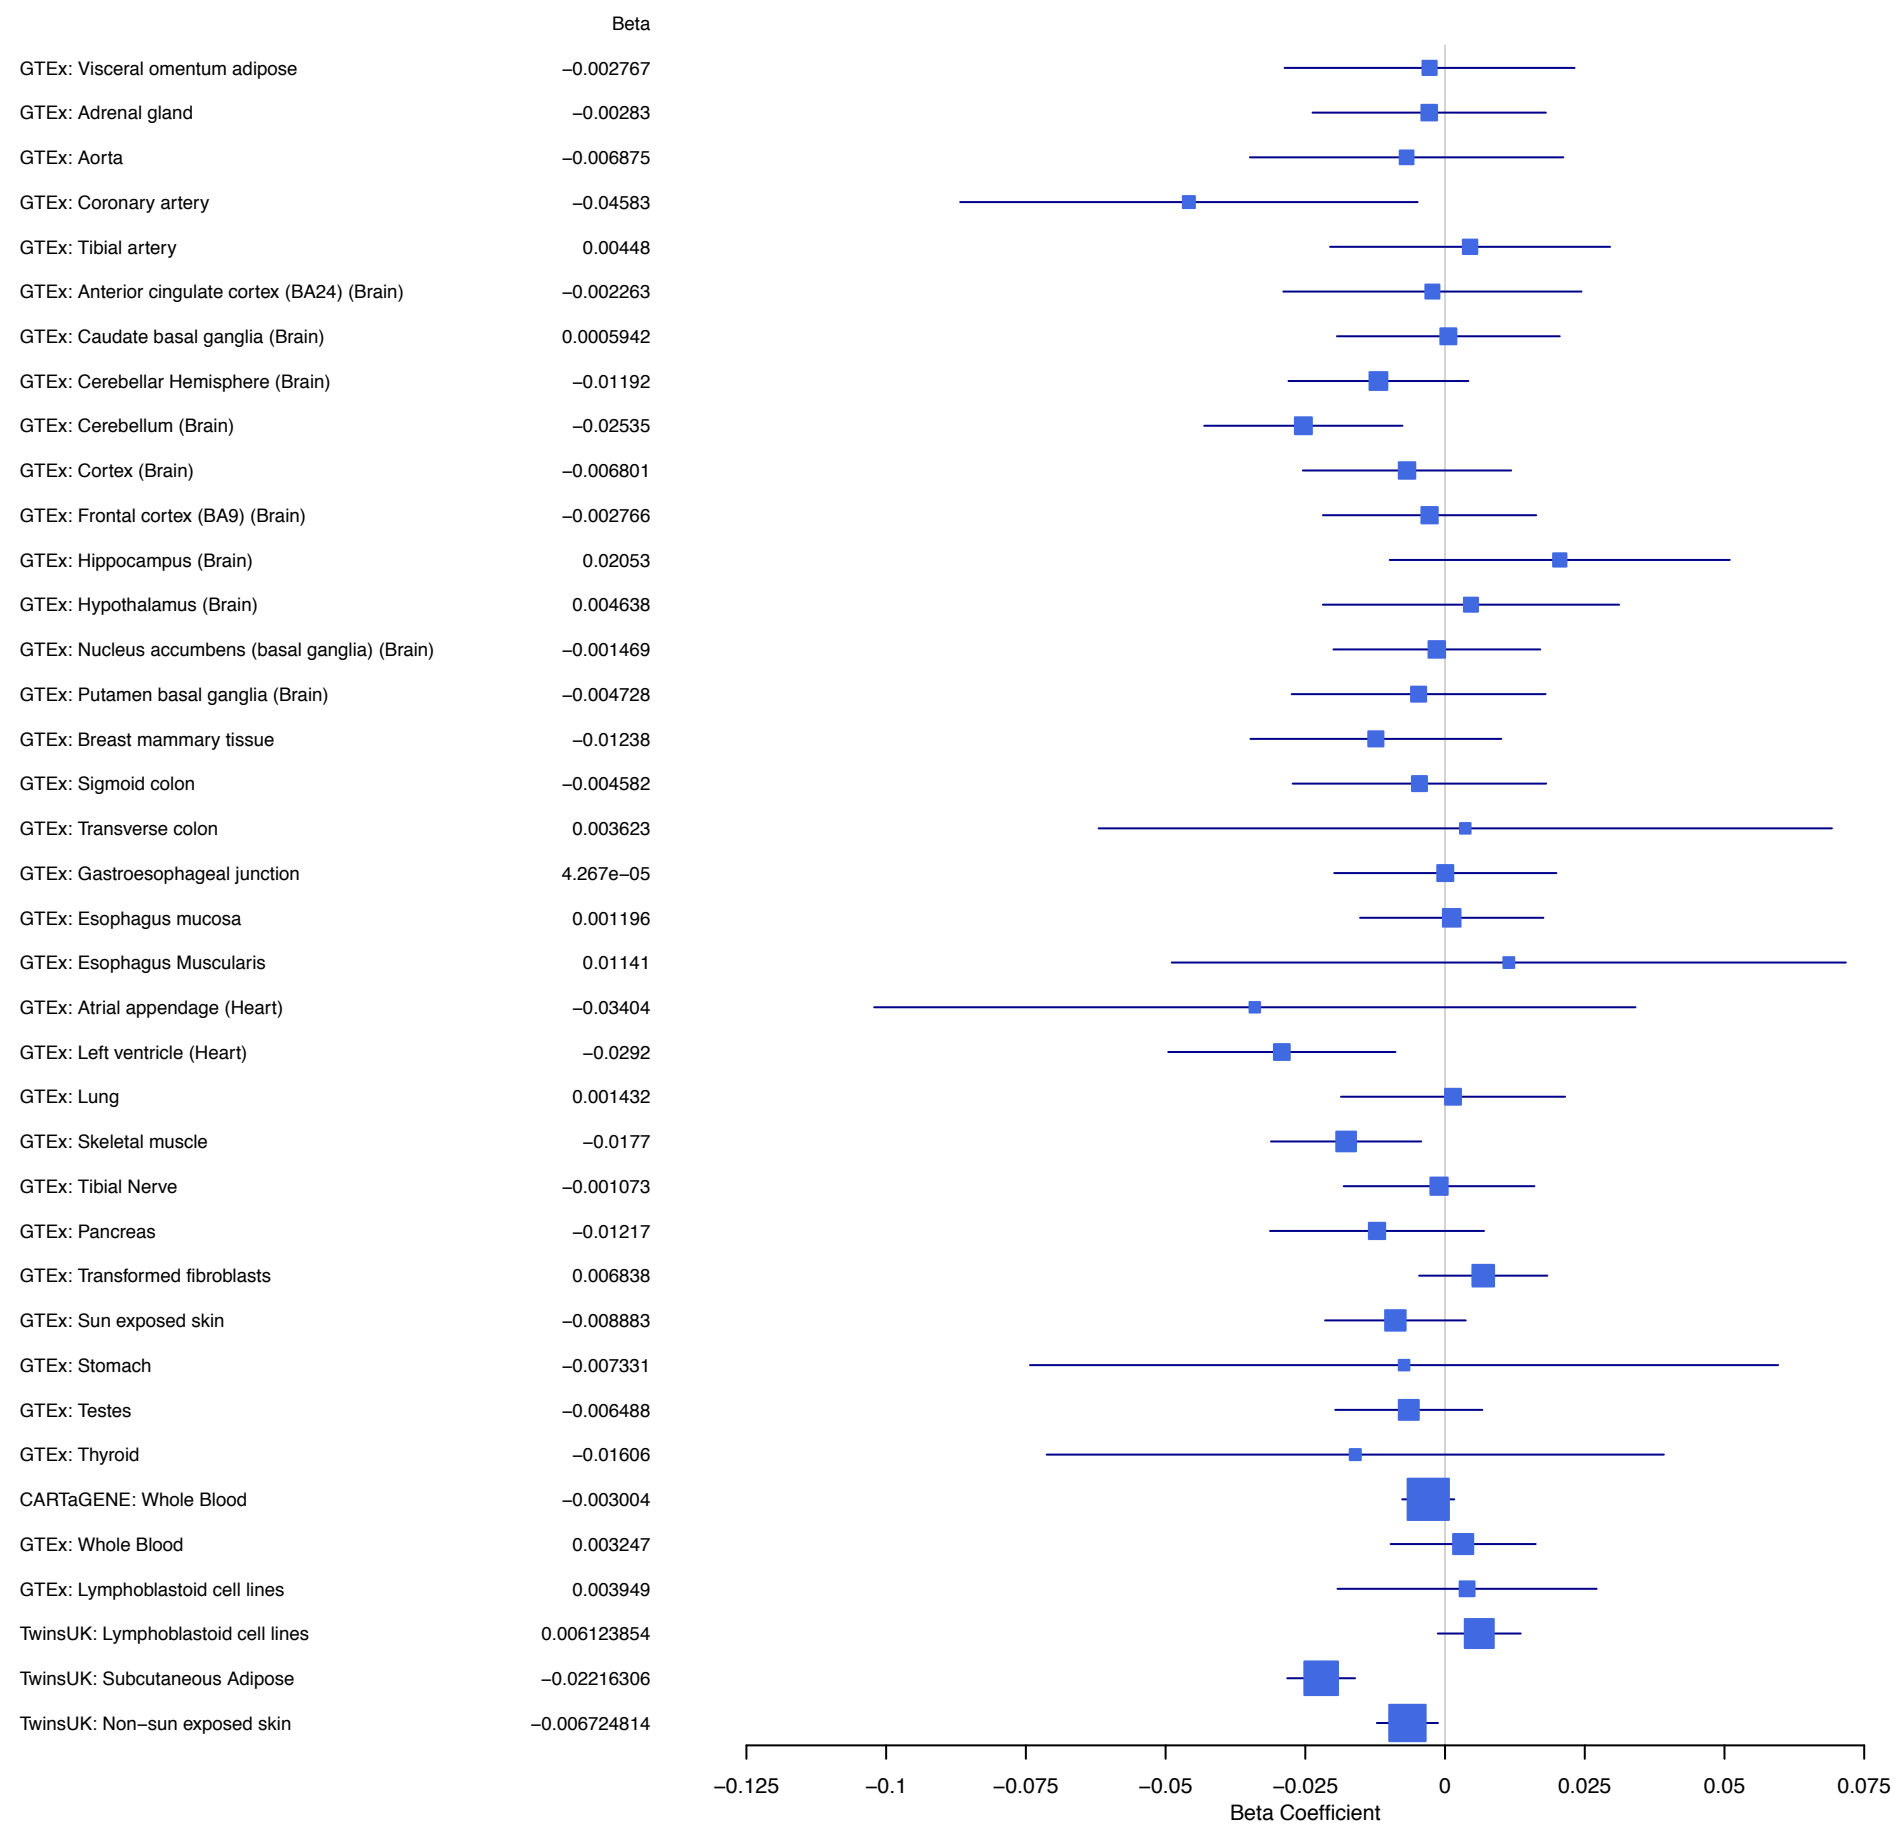

## rs12792550 : MTATP6

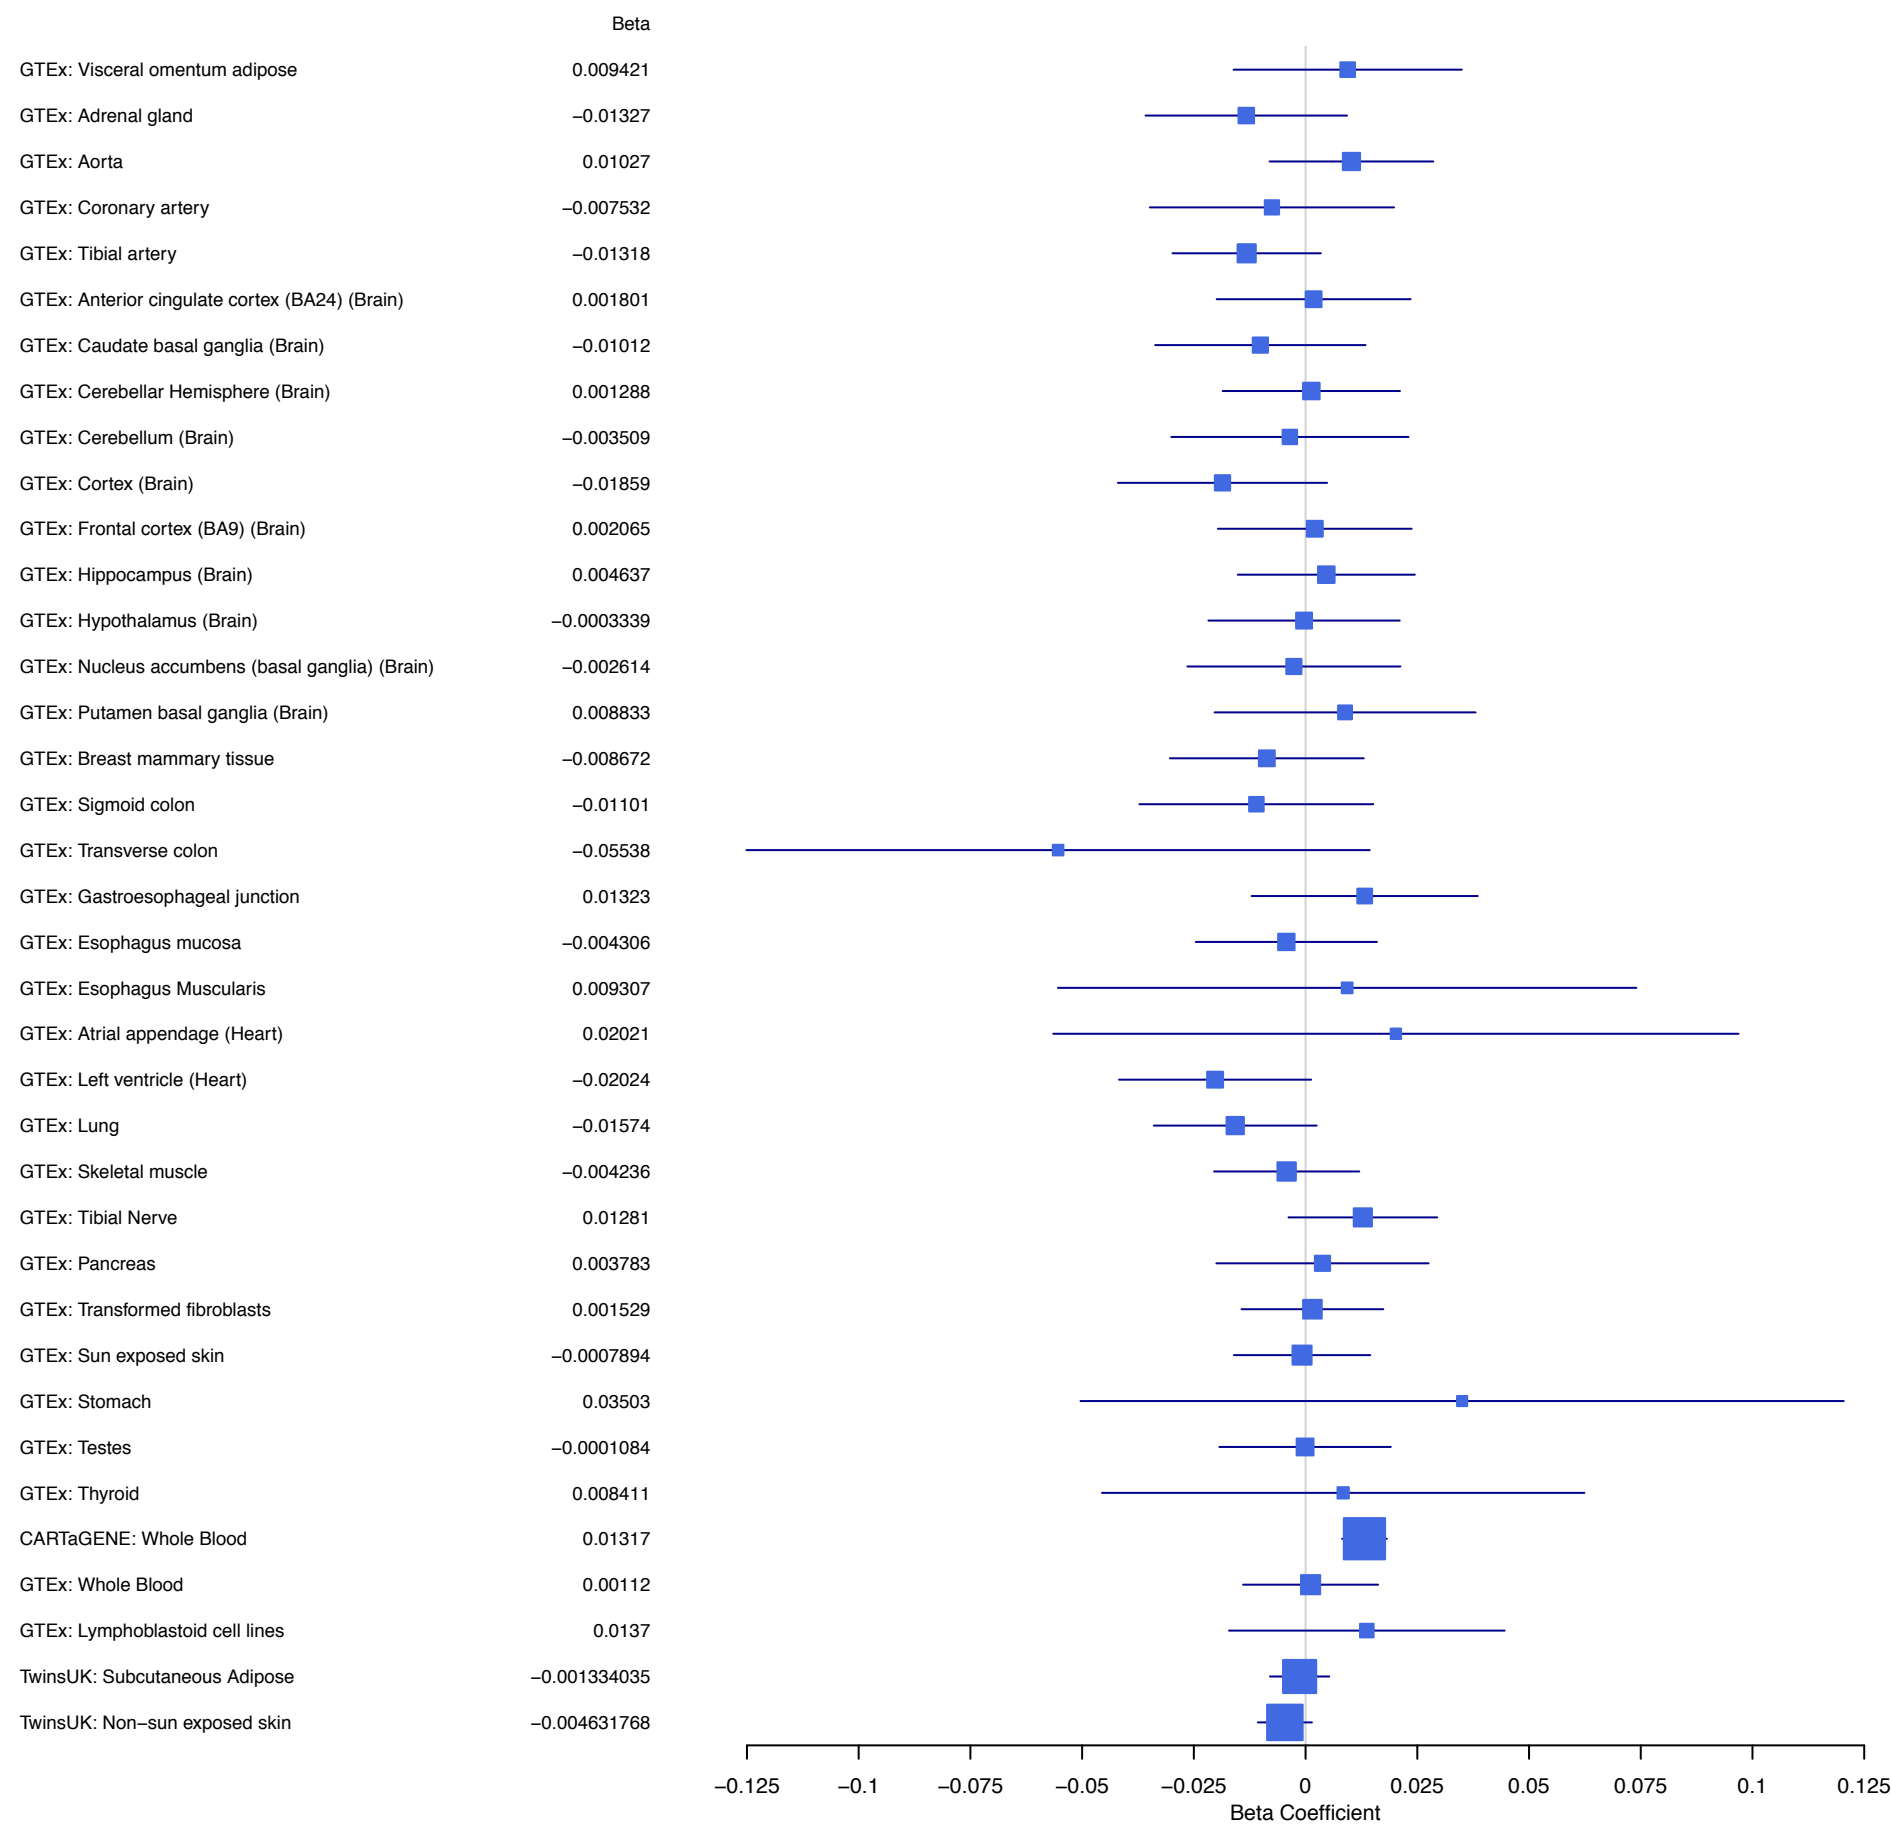

## rs35644531 : MTCYB

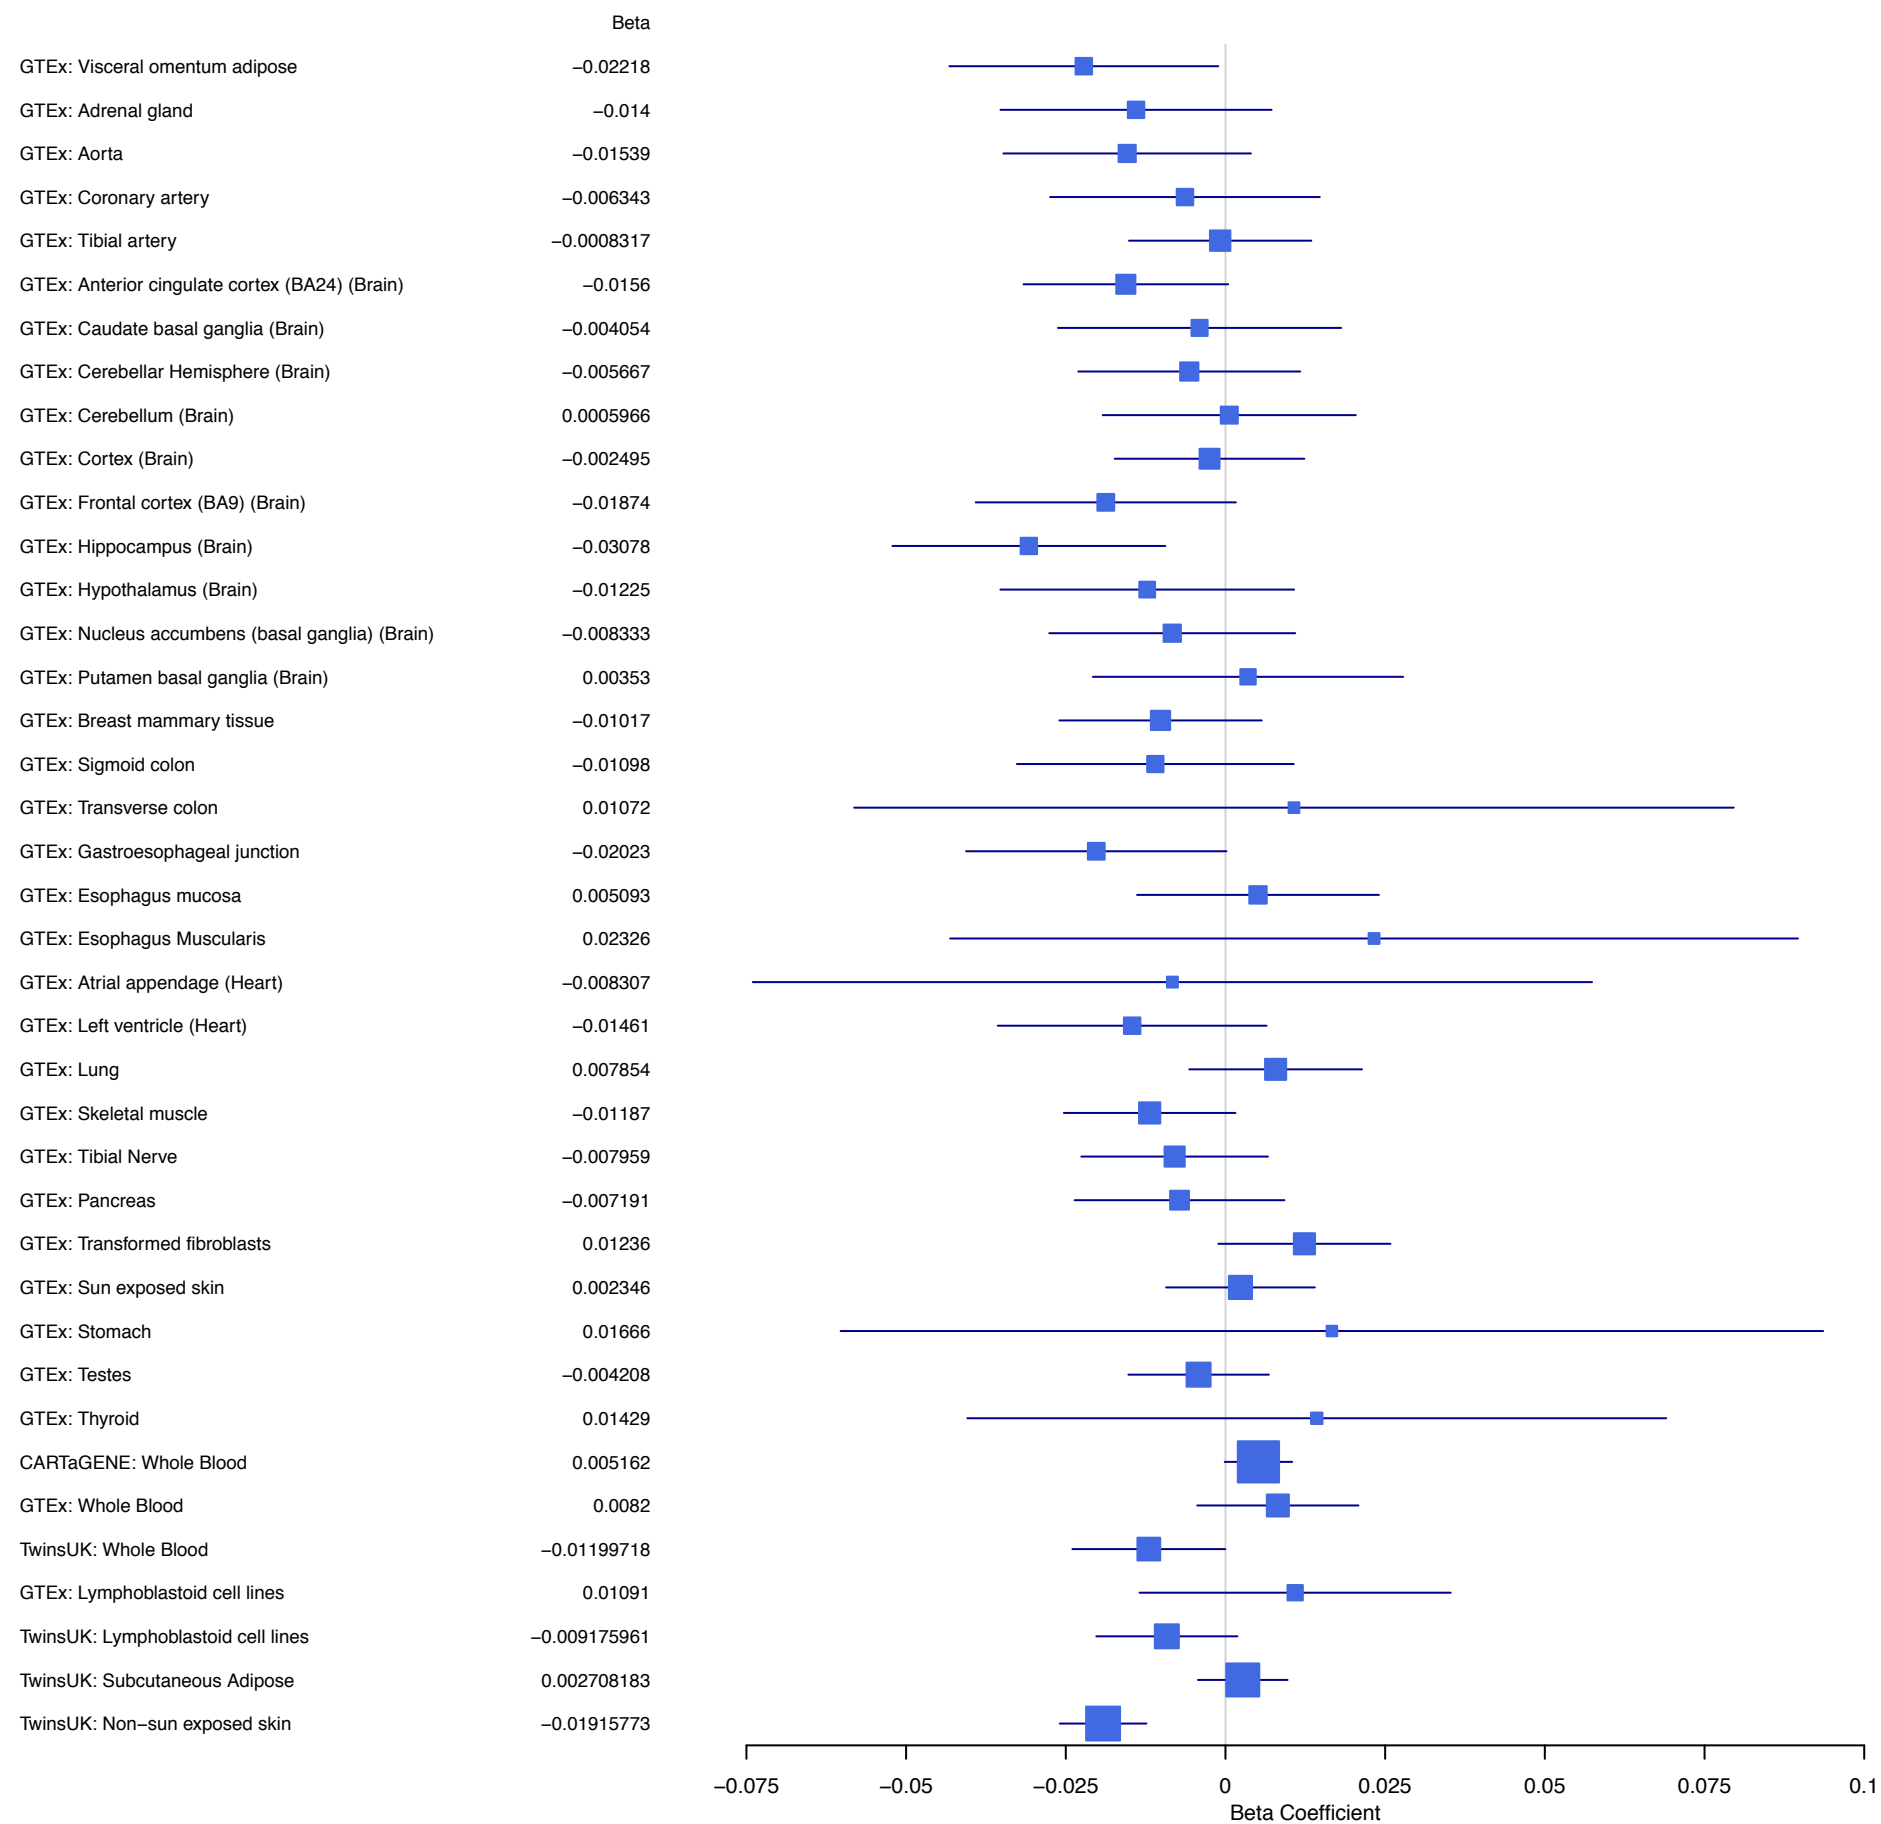

## rs35739334 : MTND1

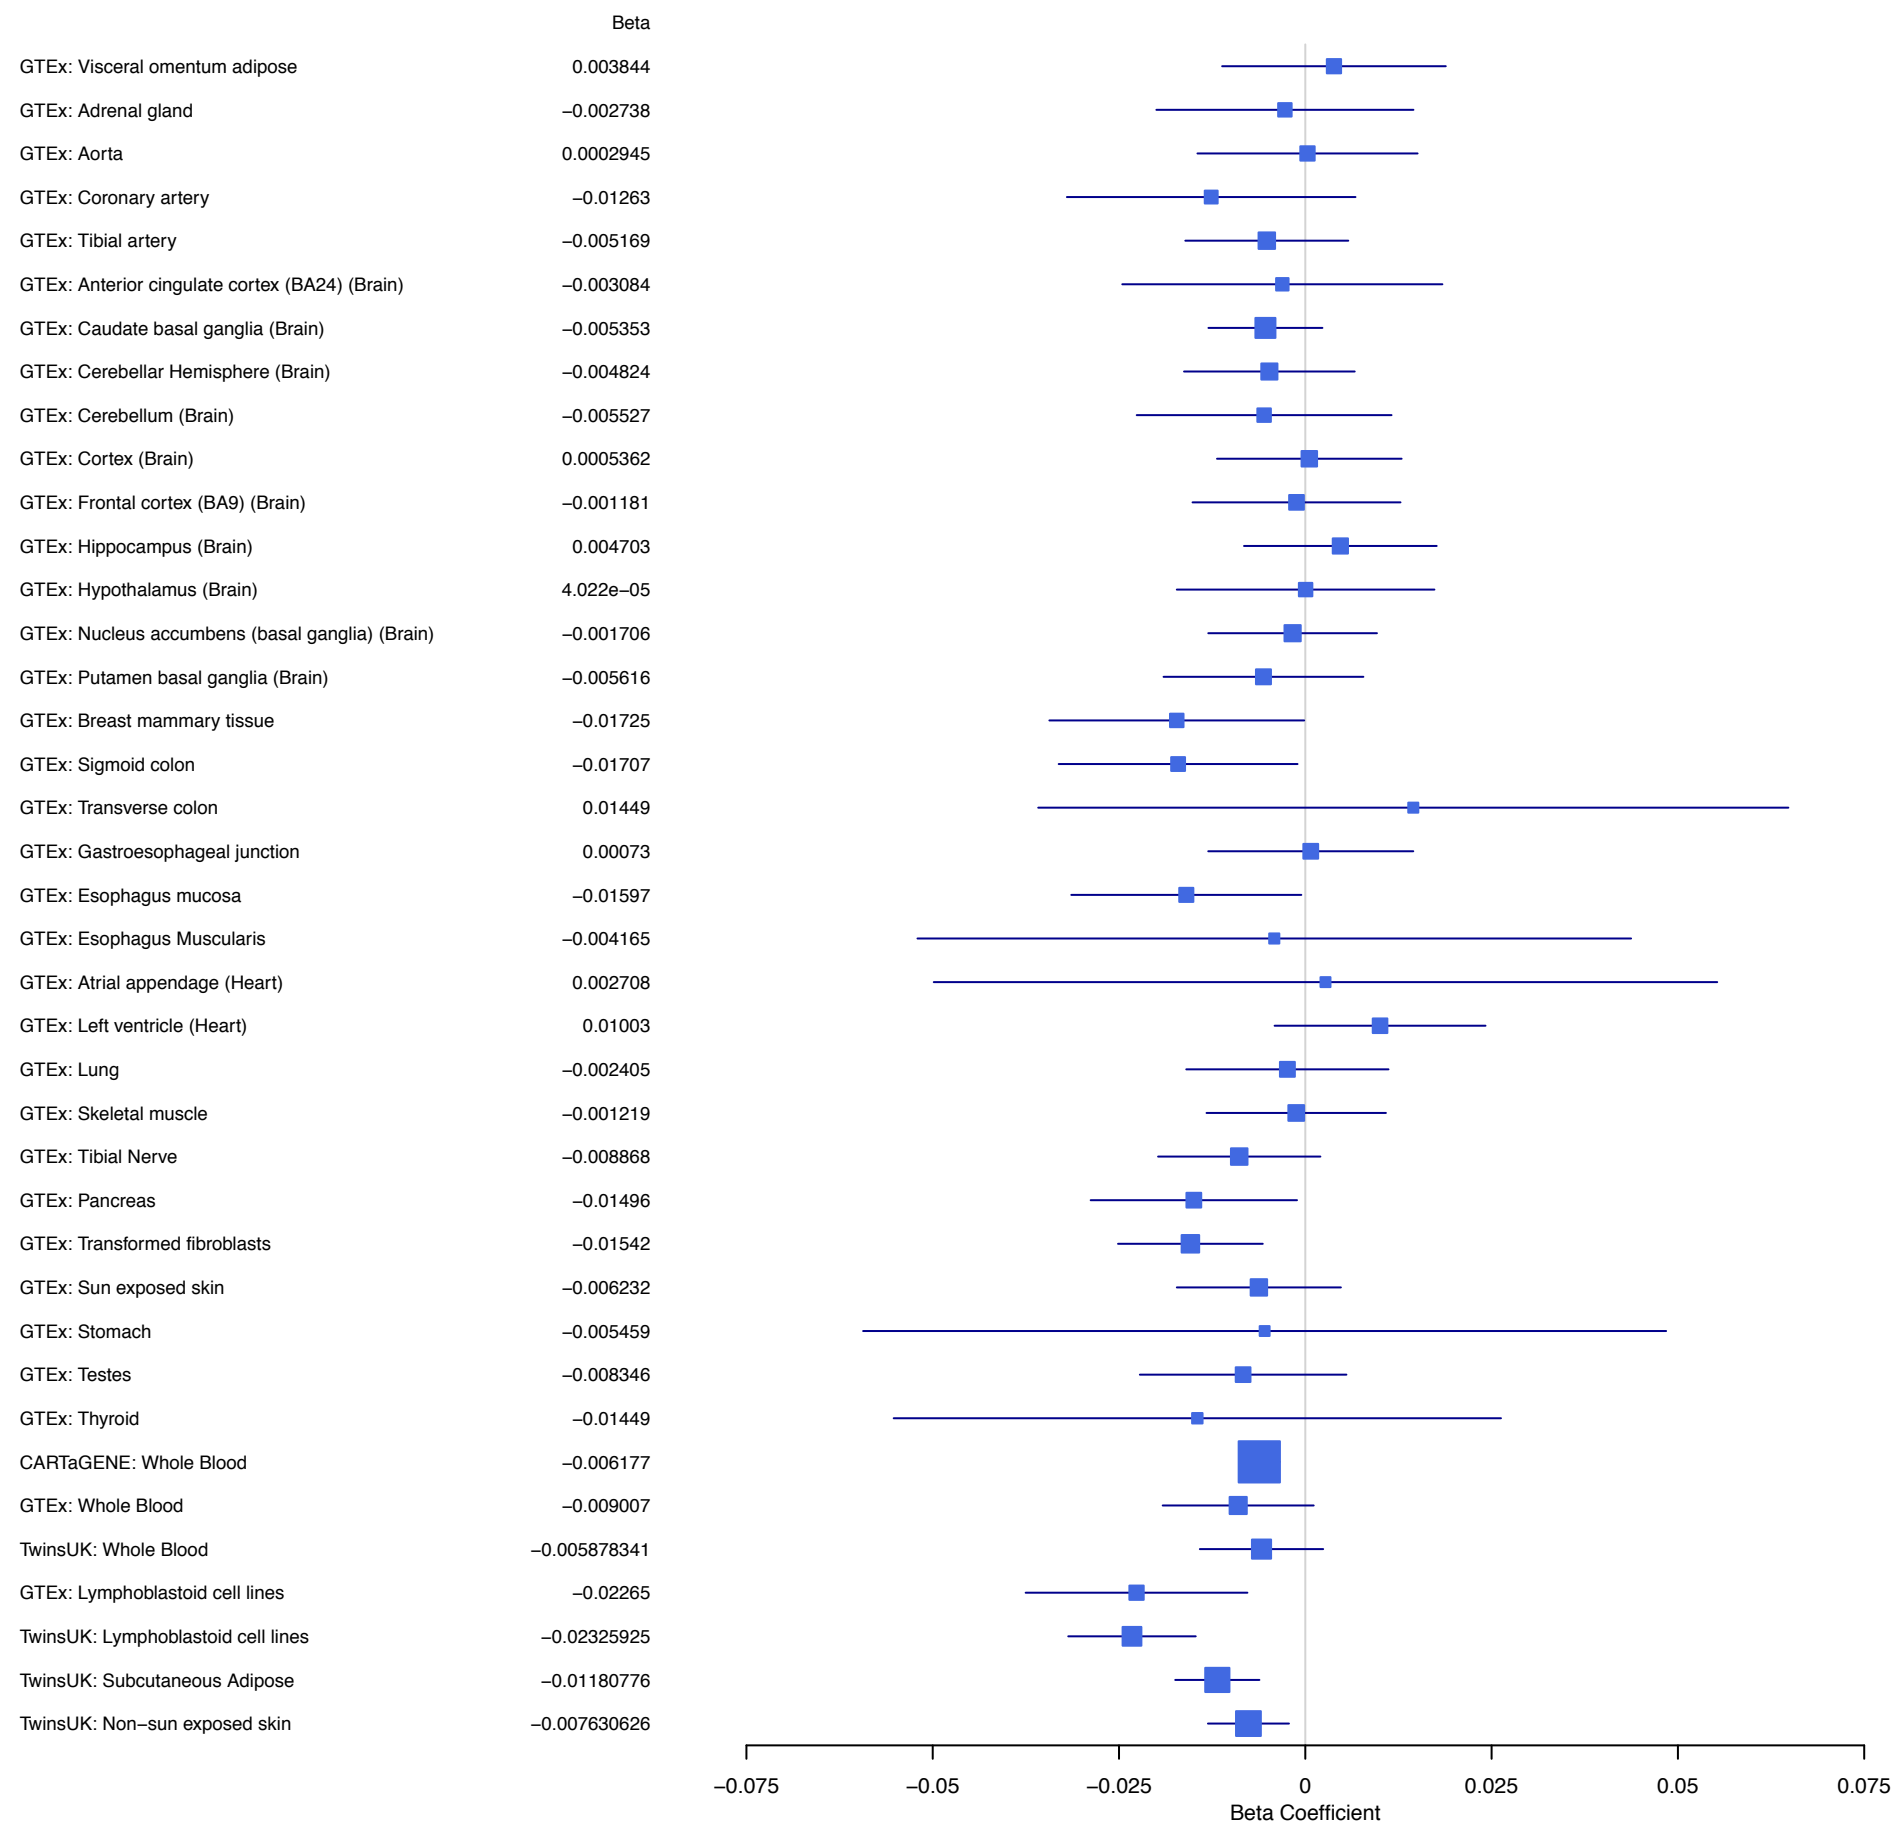

## rs58688185 : MTND6

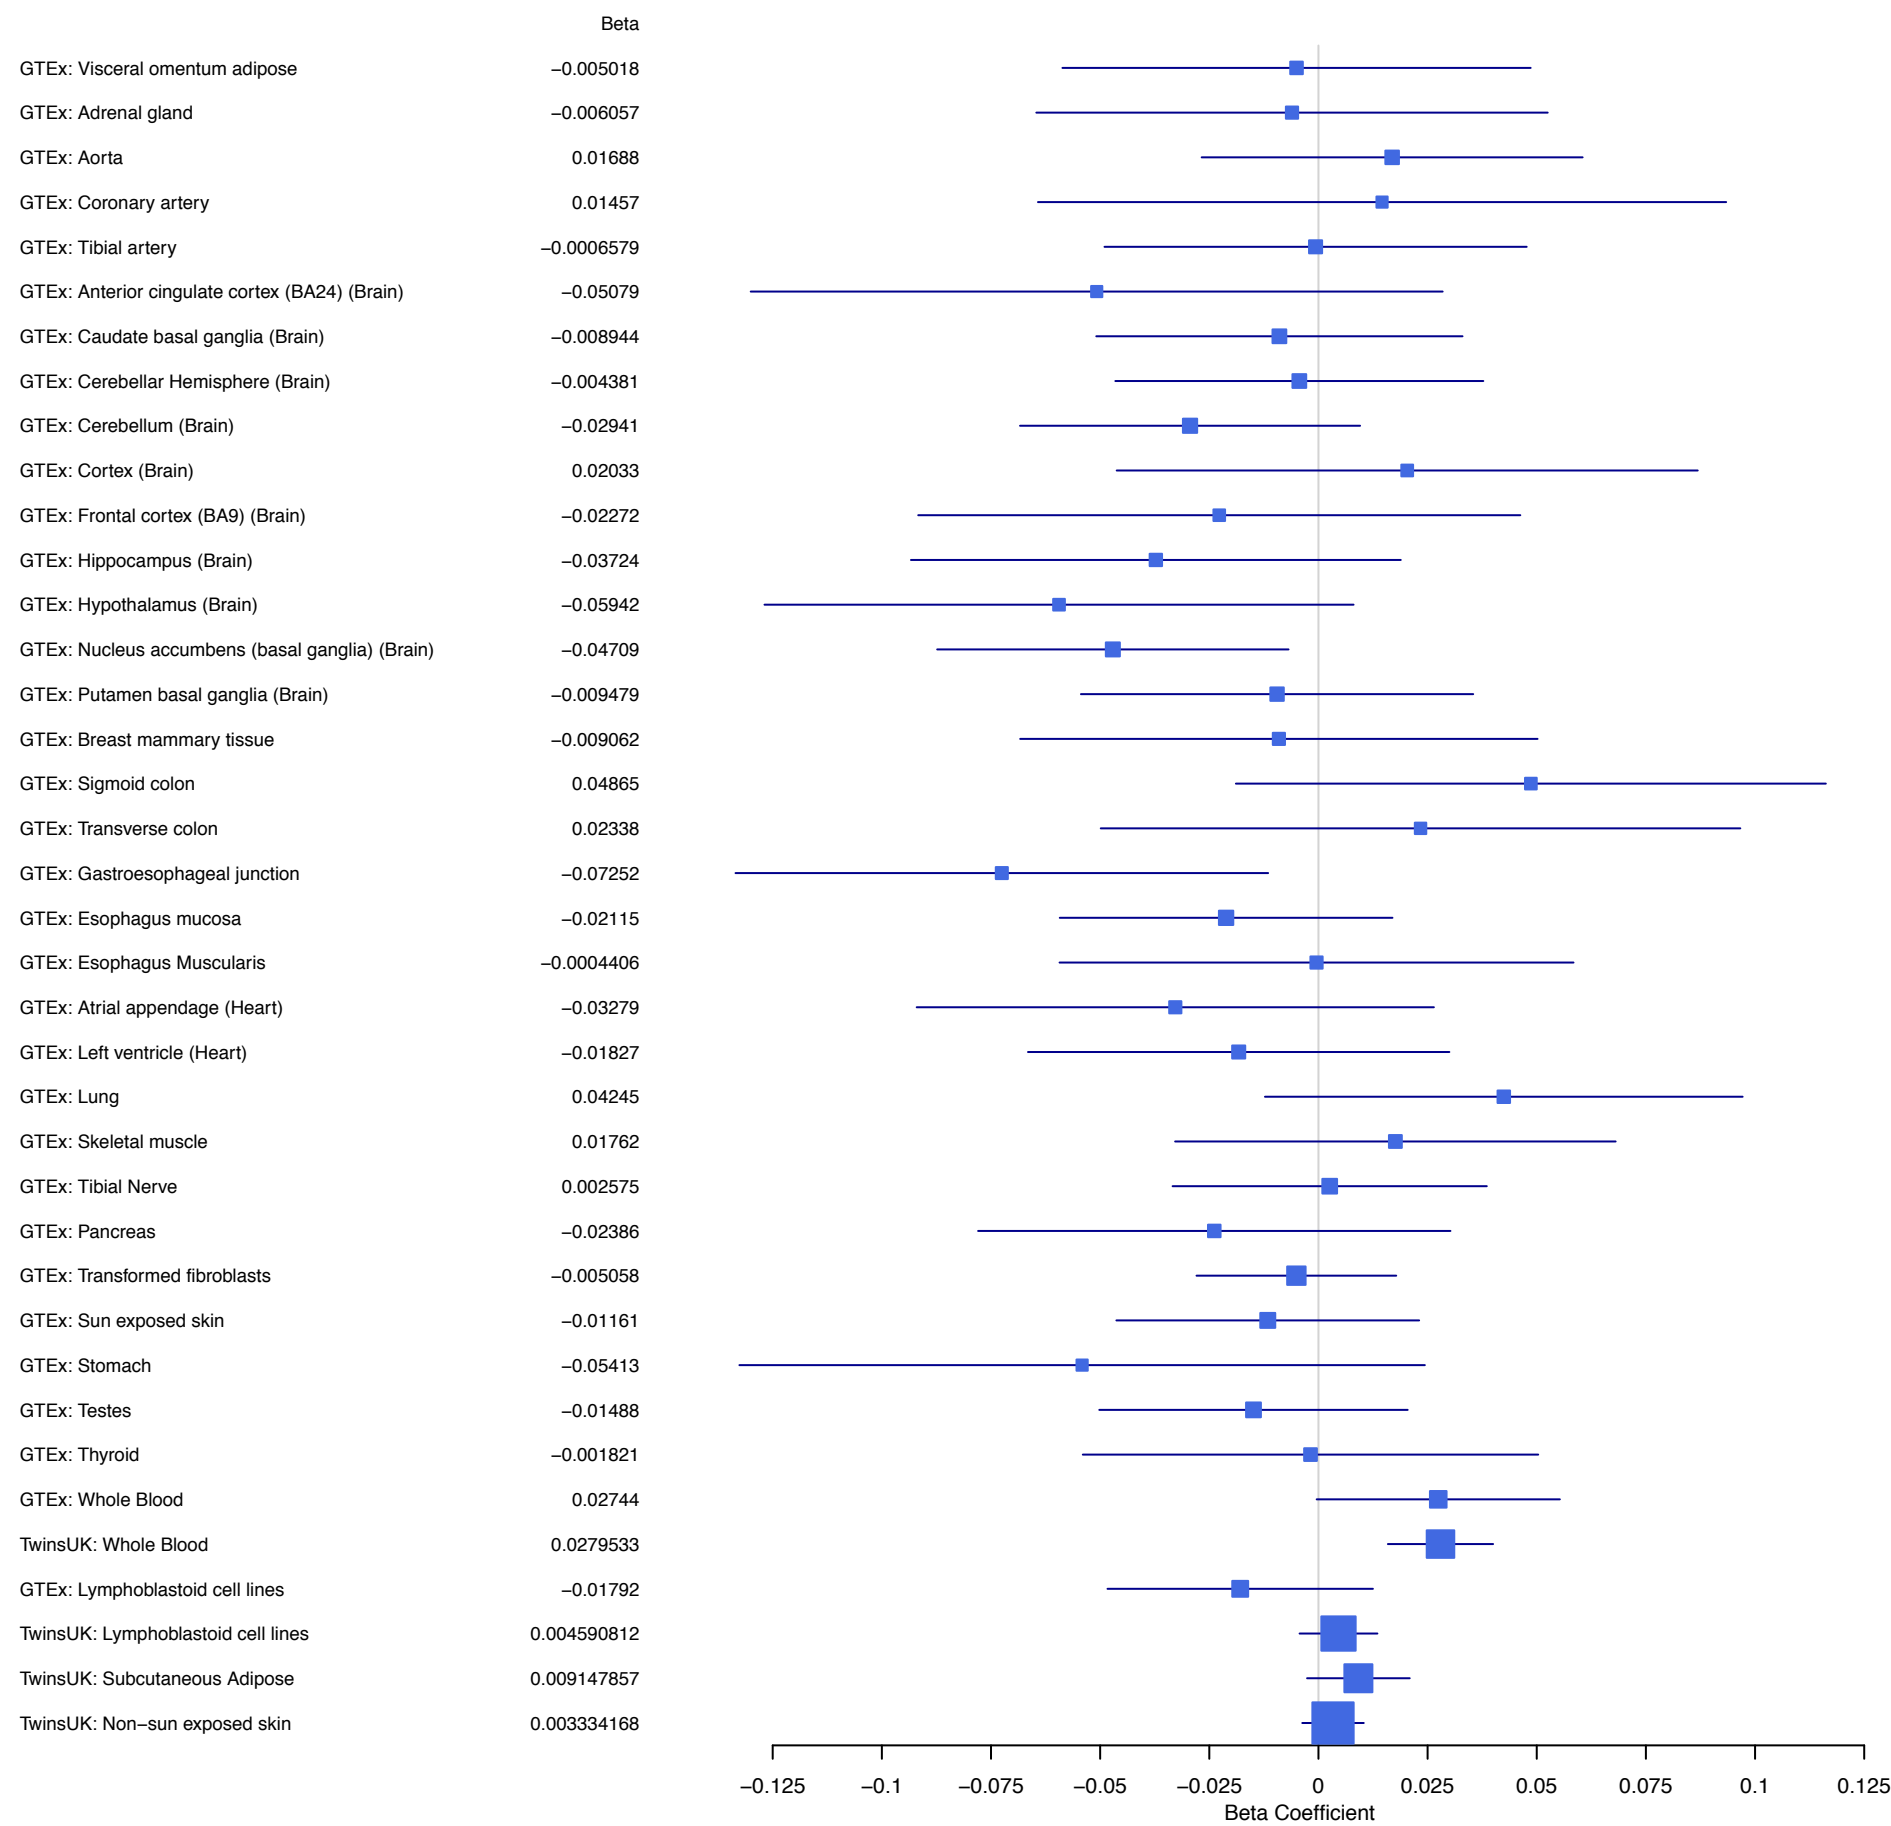

## rs61940184 : MTND2

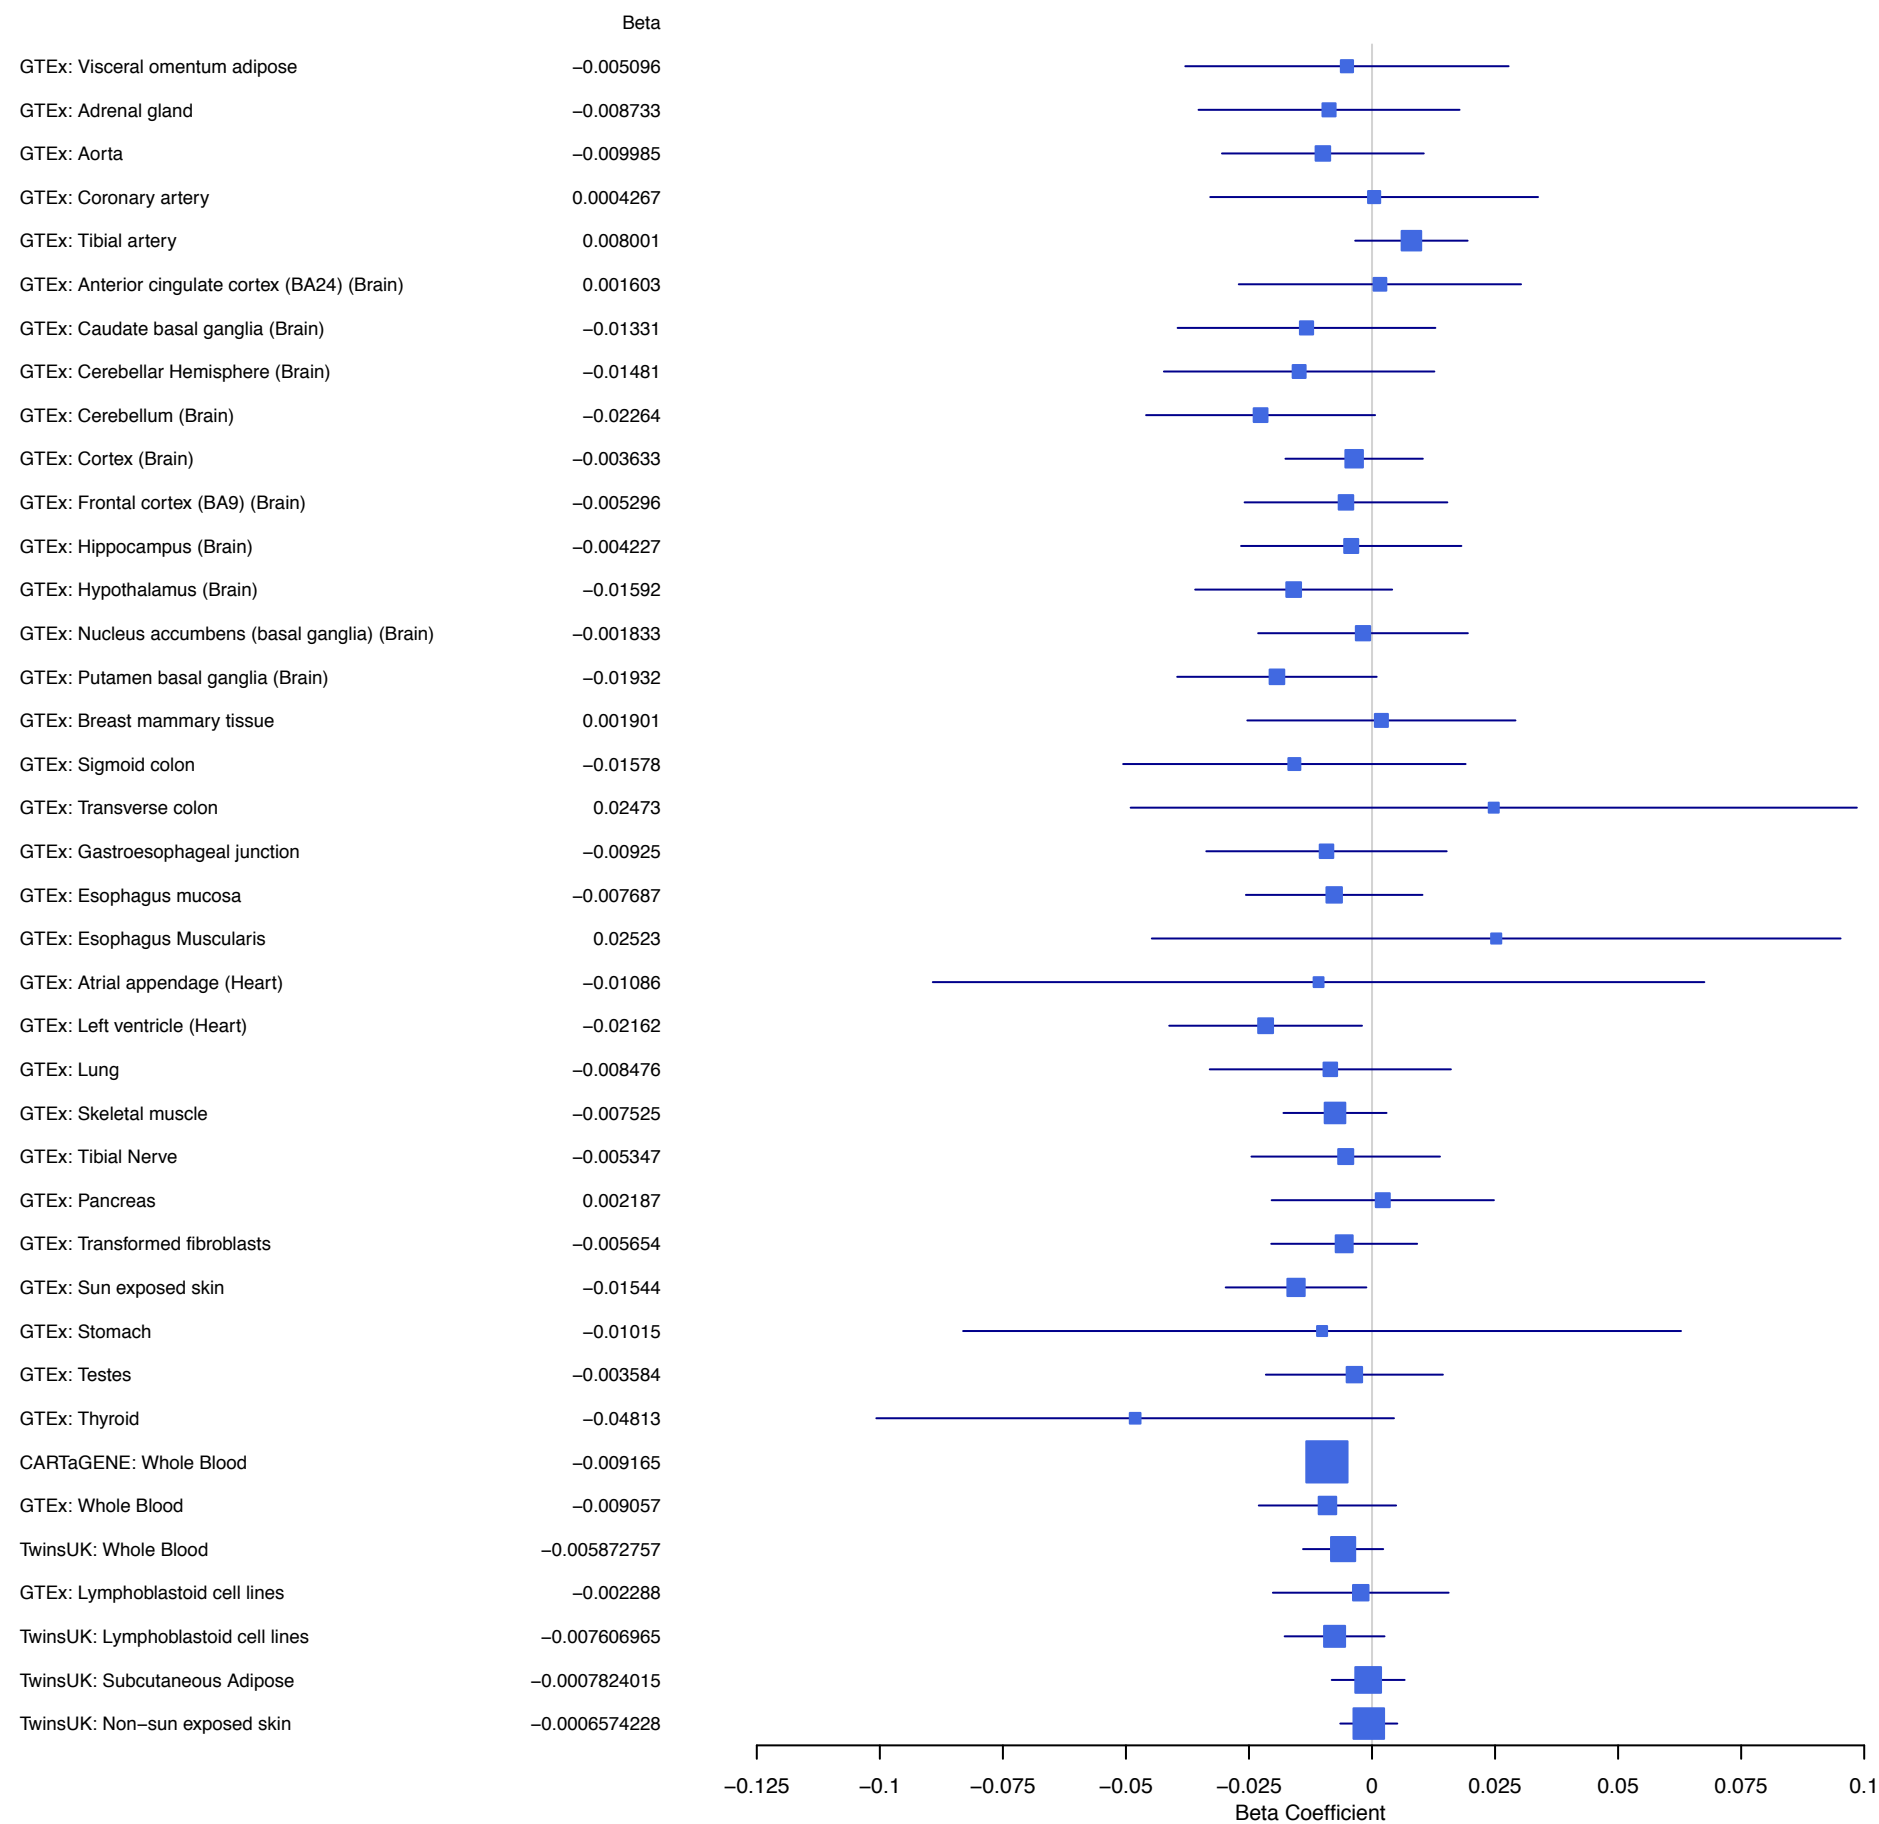

rs61988269 : MTRNR1

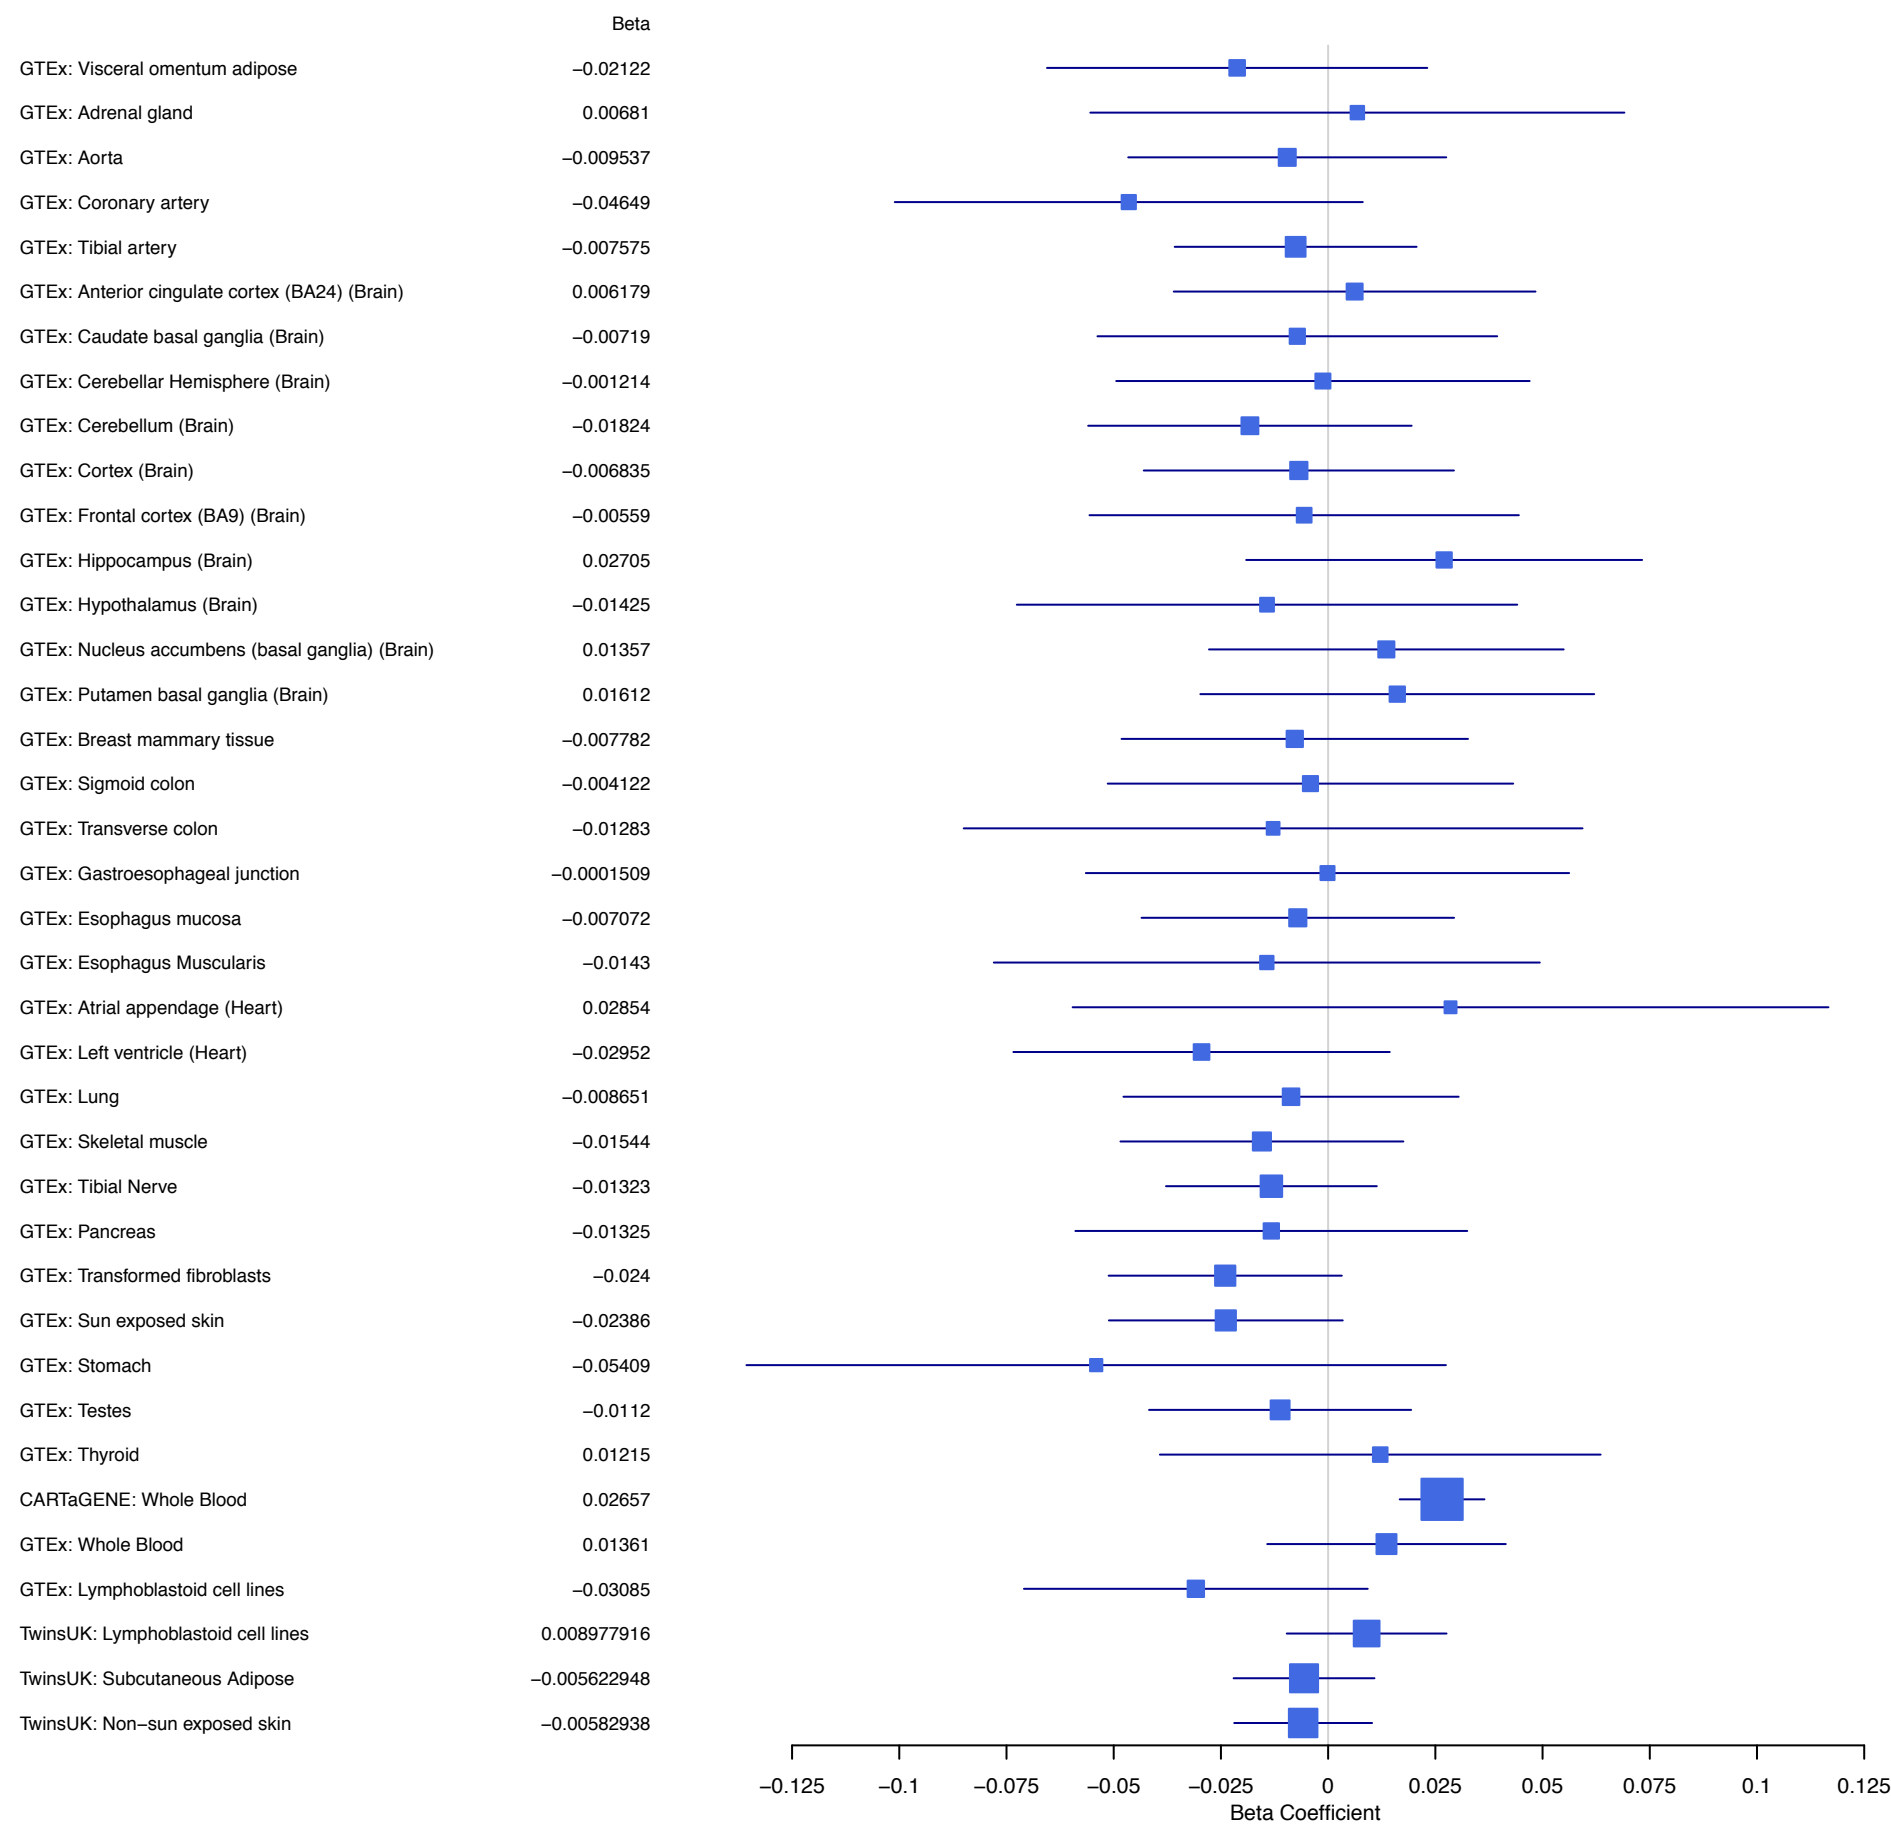

rs62014423 : MTRNR1

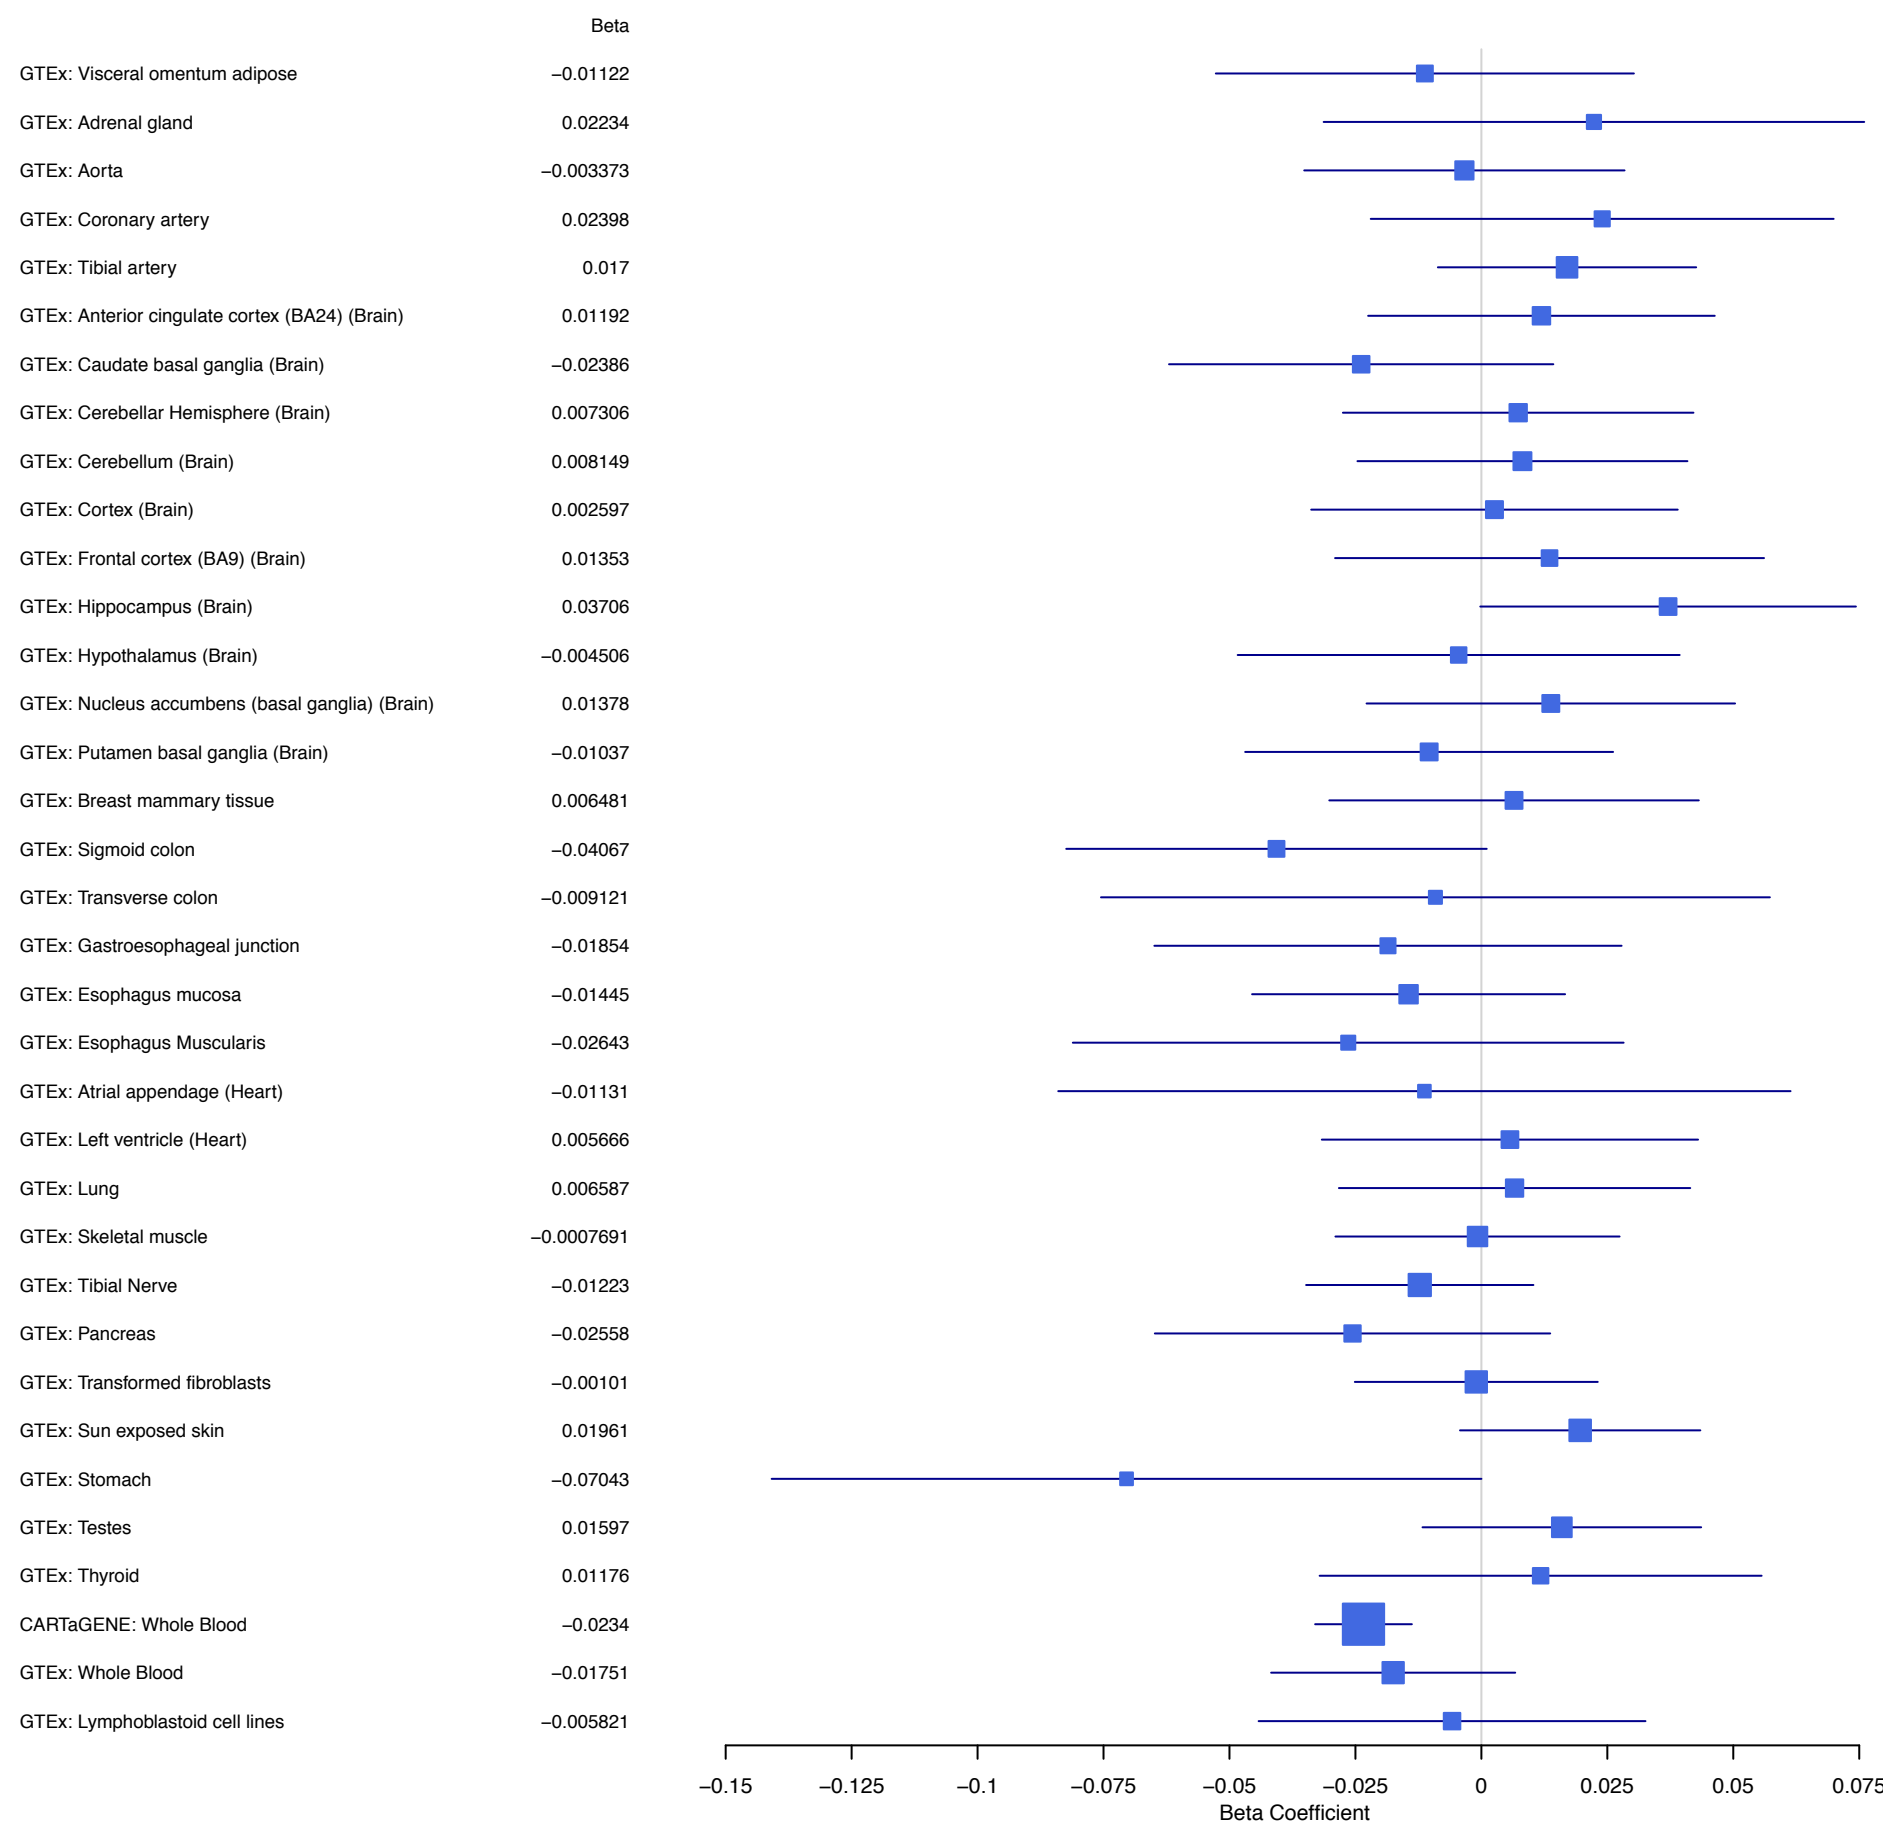

## rs62165226 : MTCO3

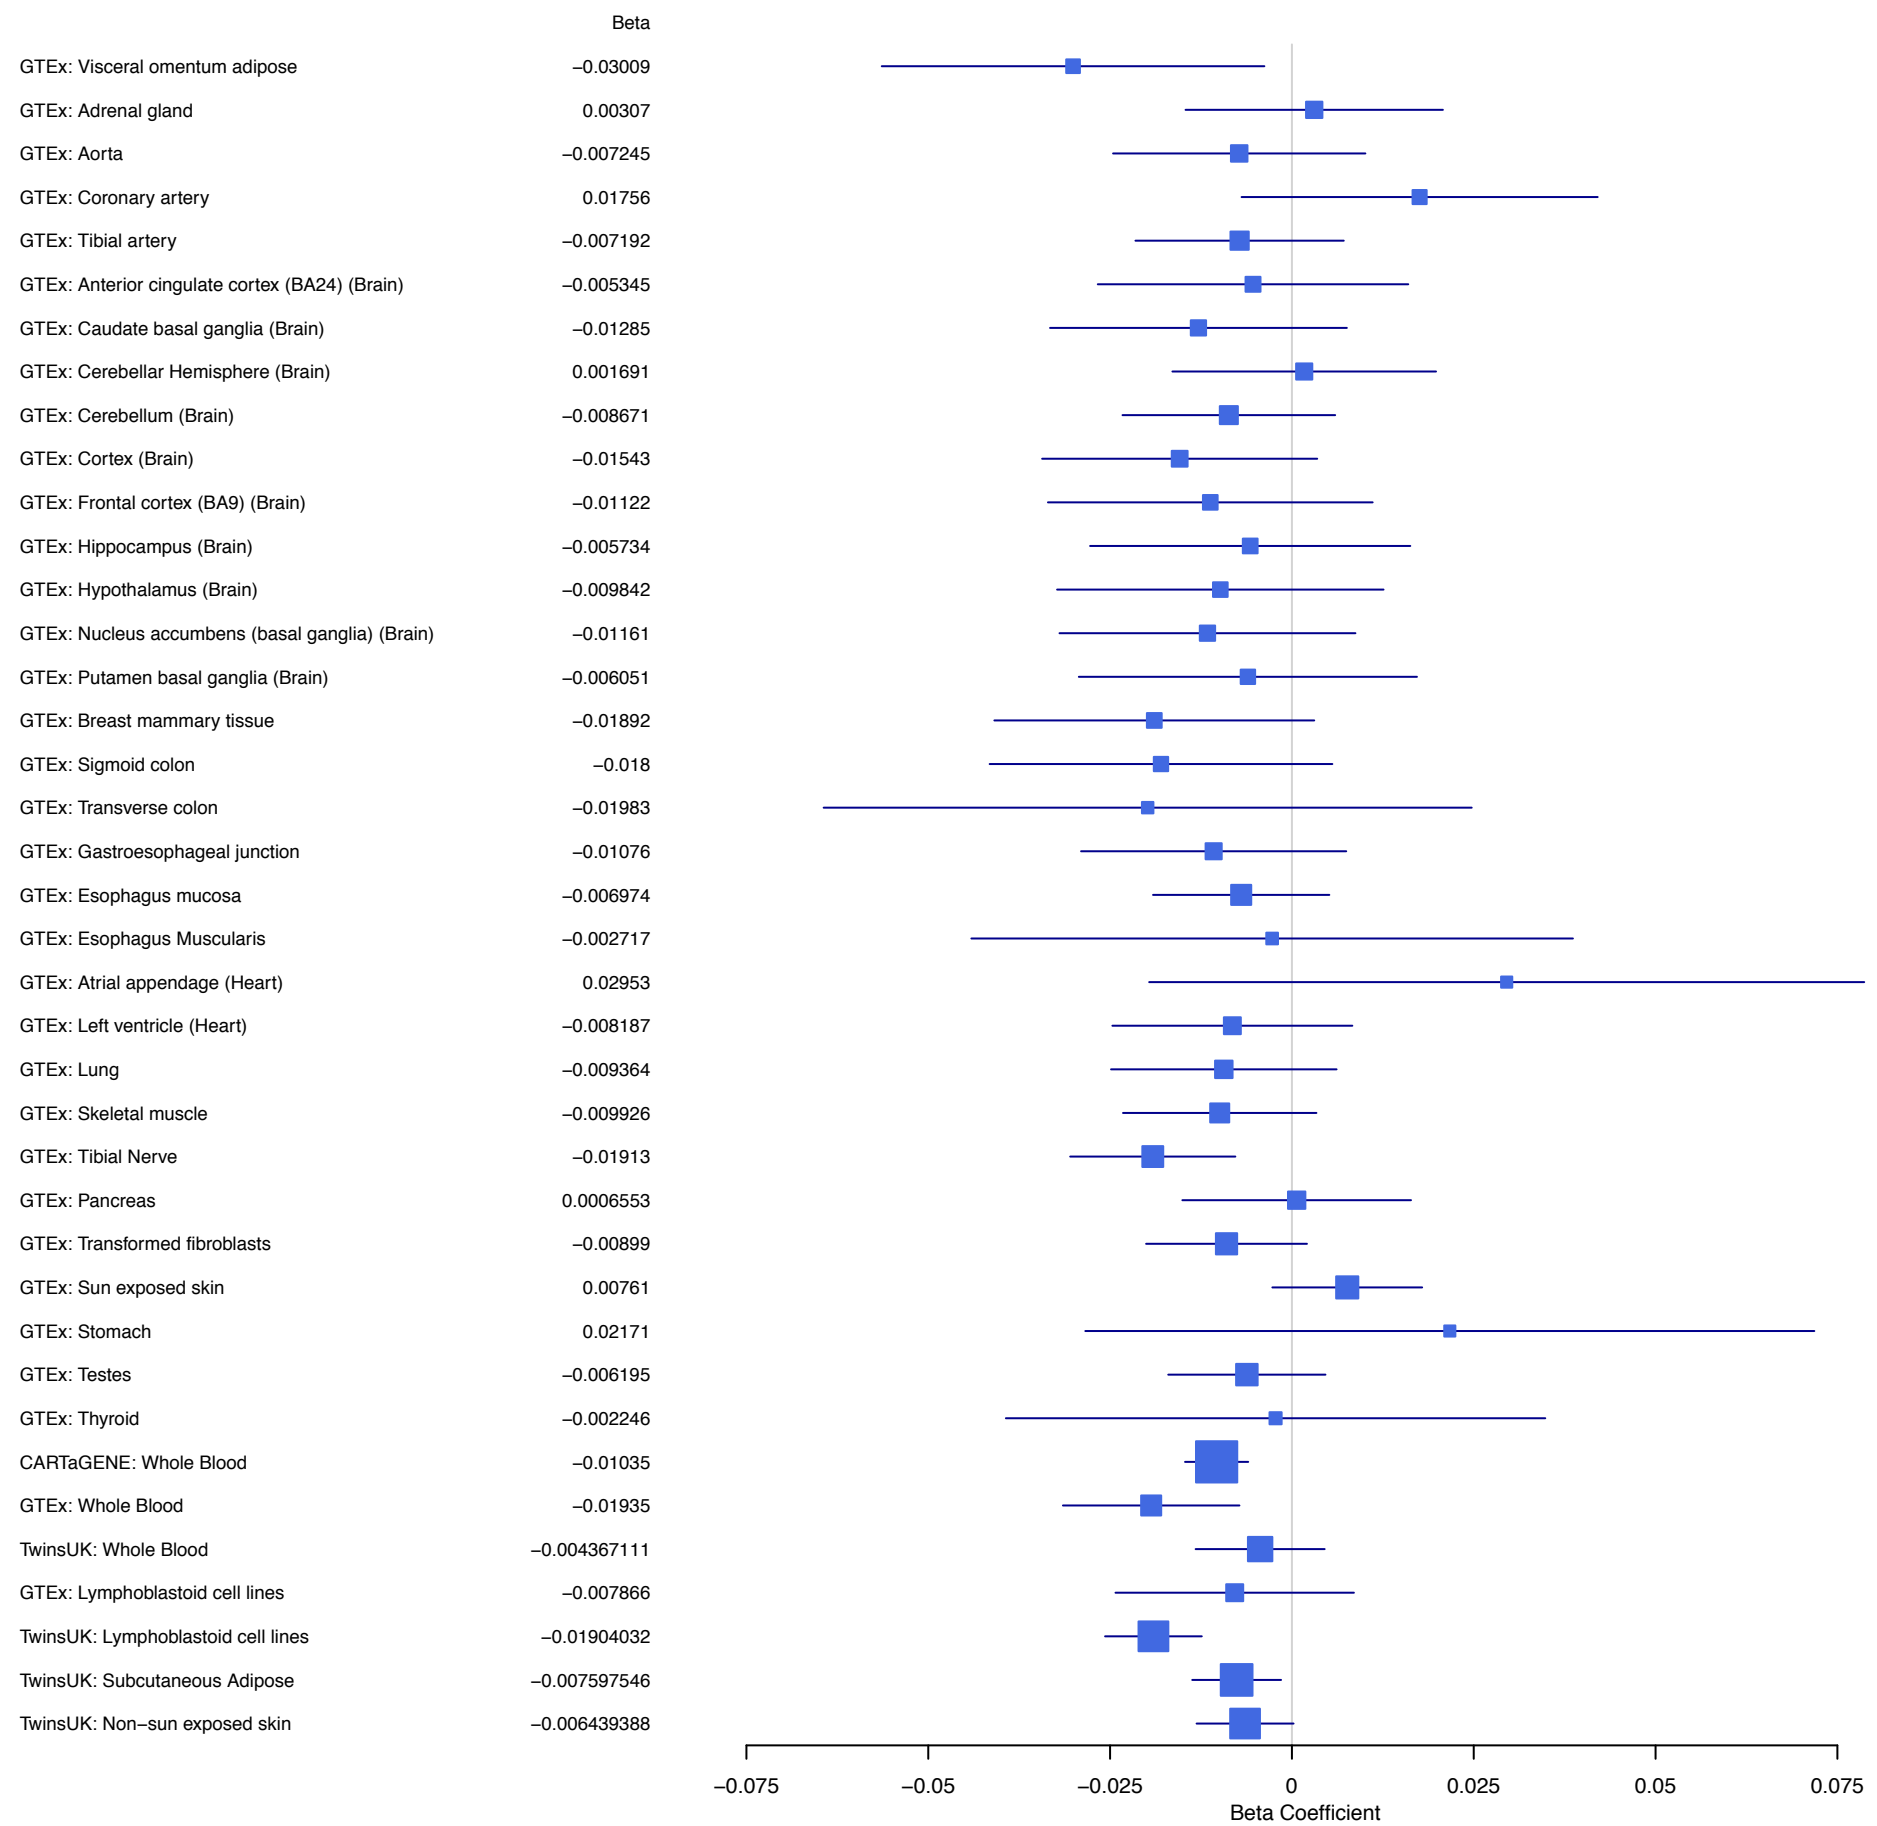

## rs66892251: MTRNR2

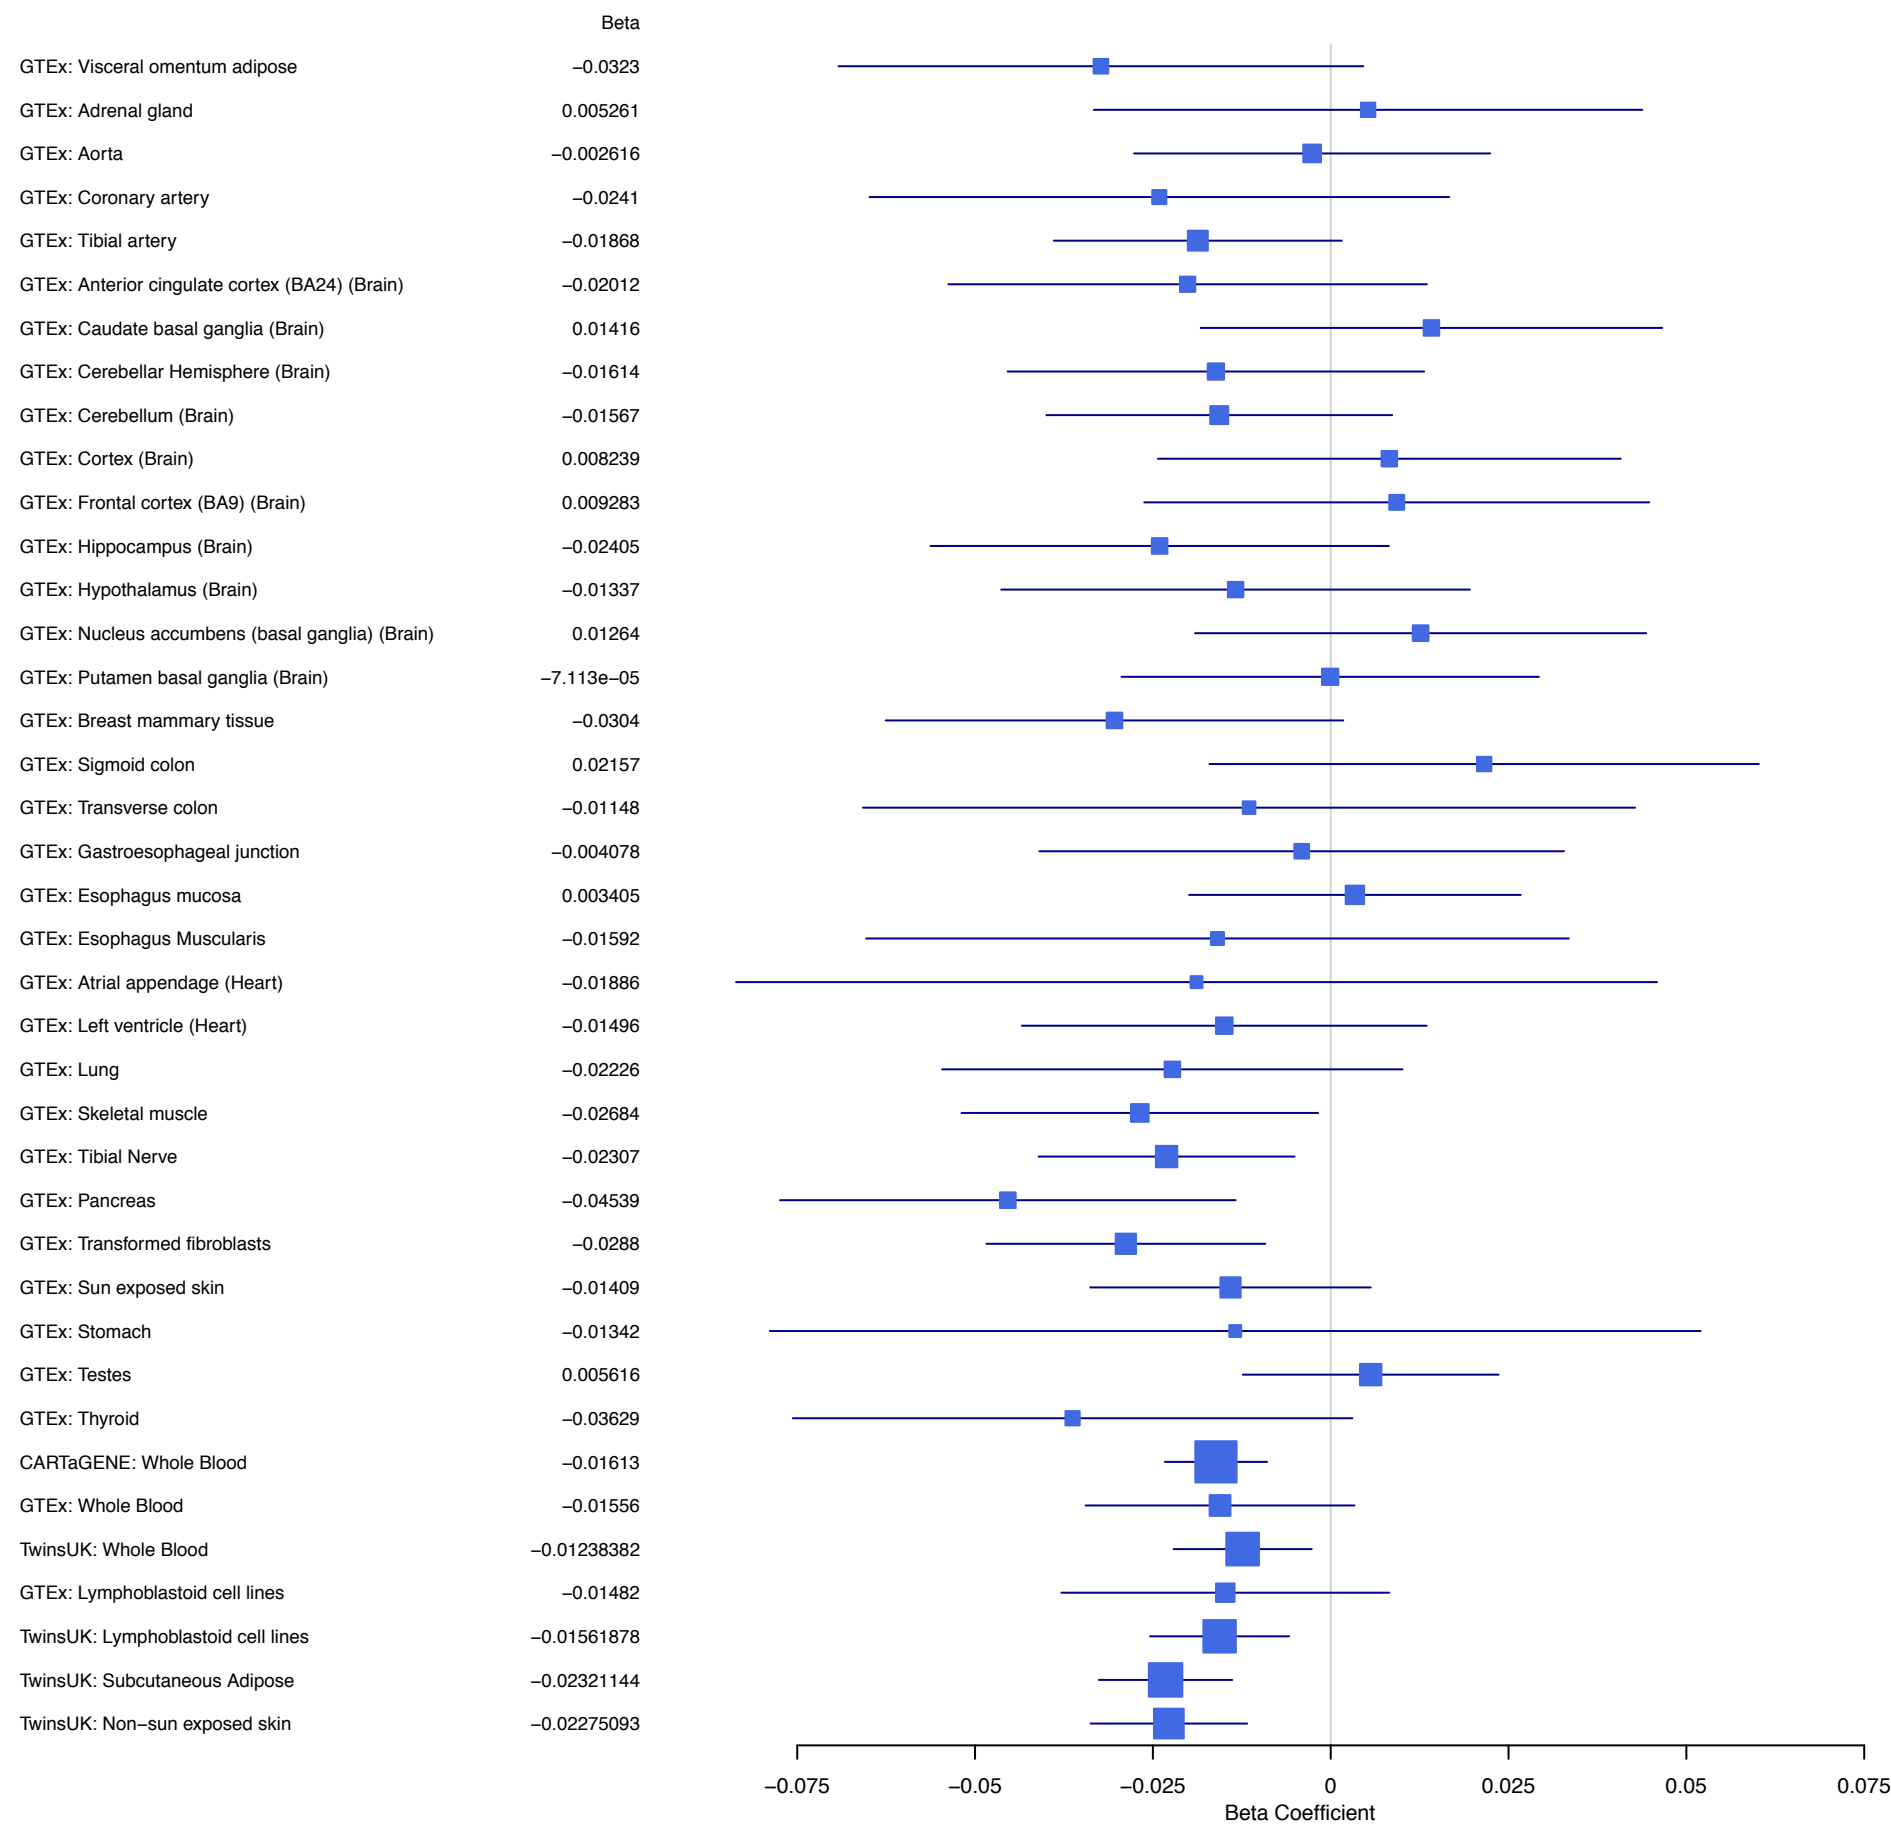

## rs73108116 : MTND5

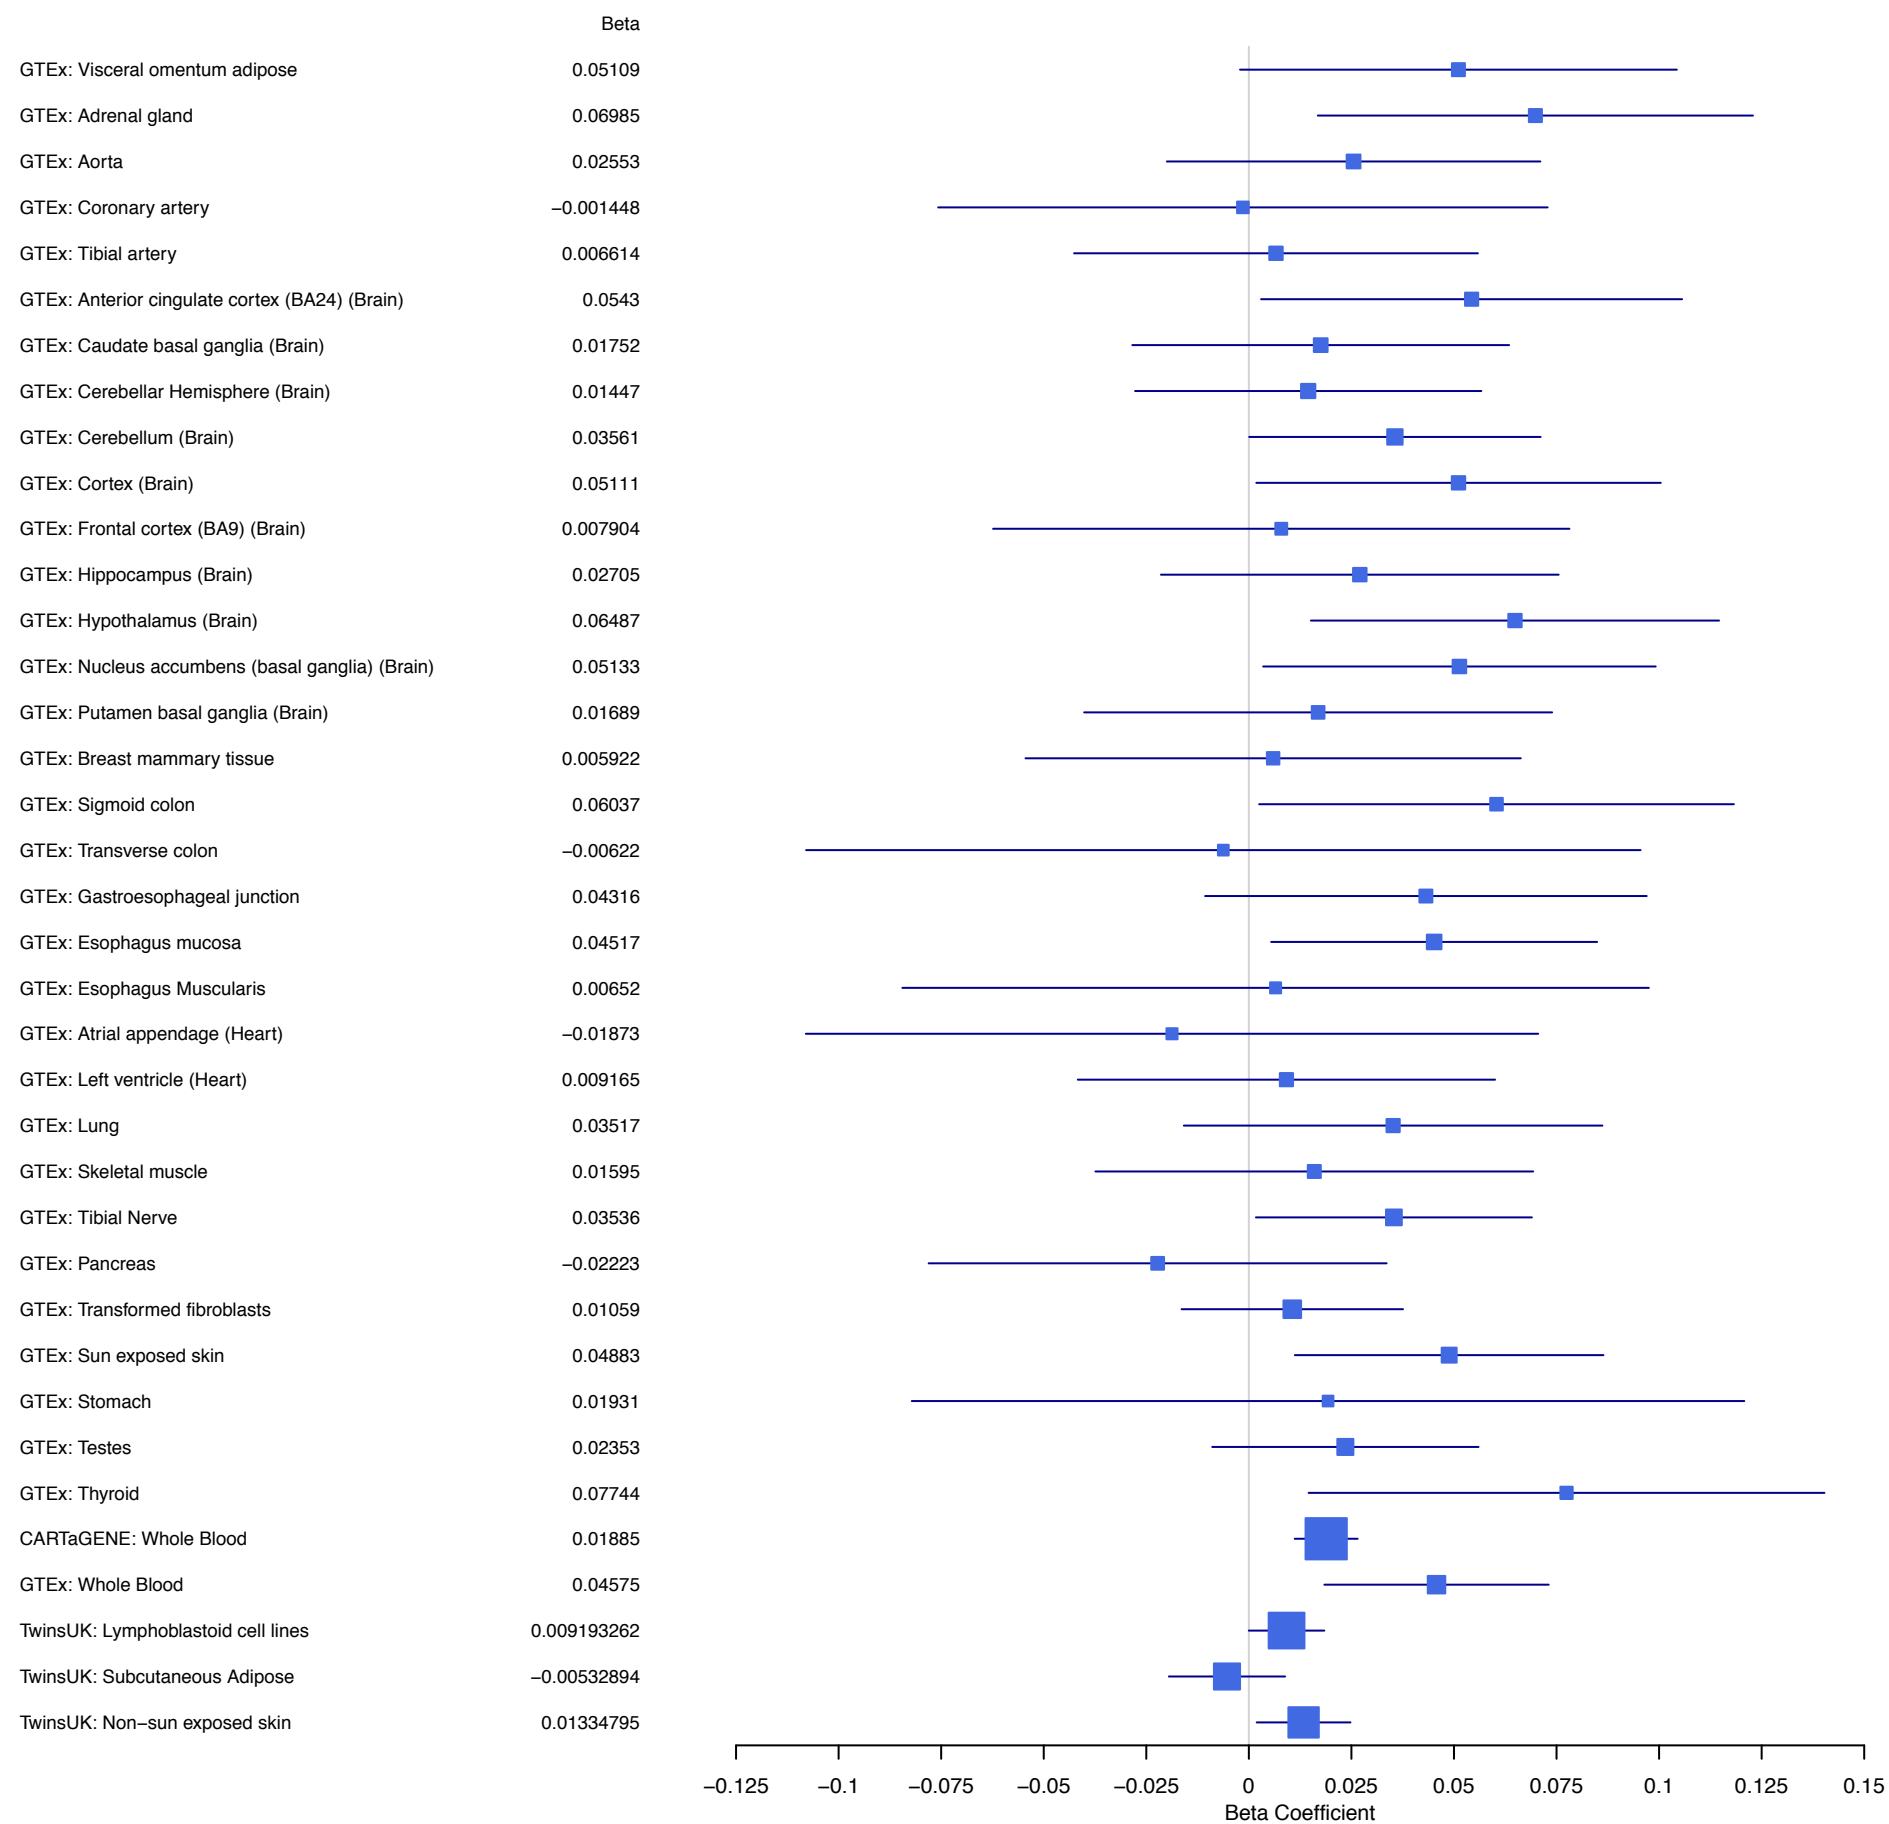

## rs74025341 : MTCYB

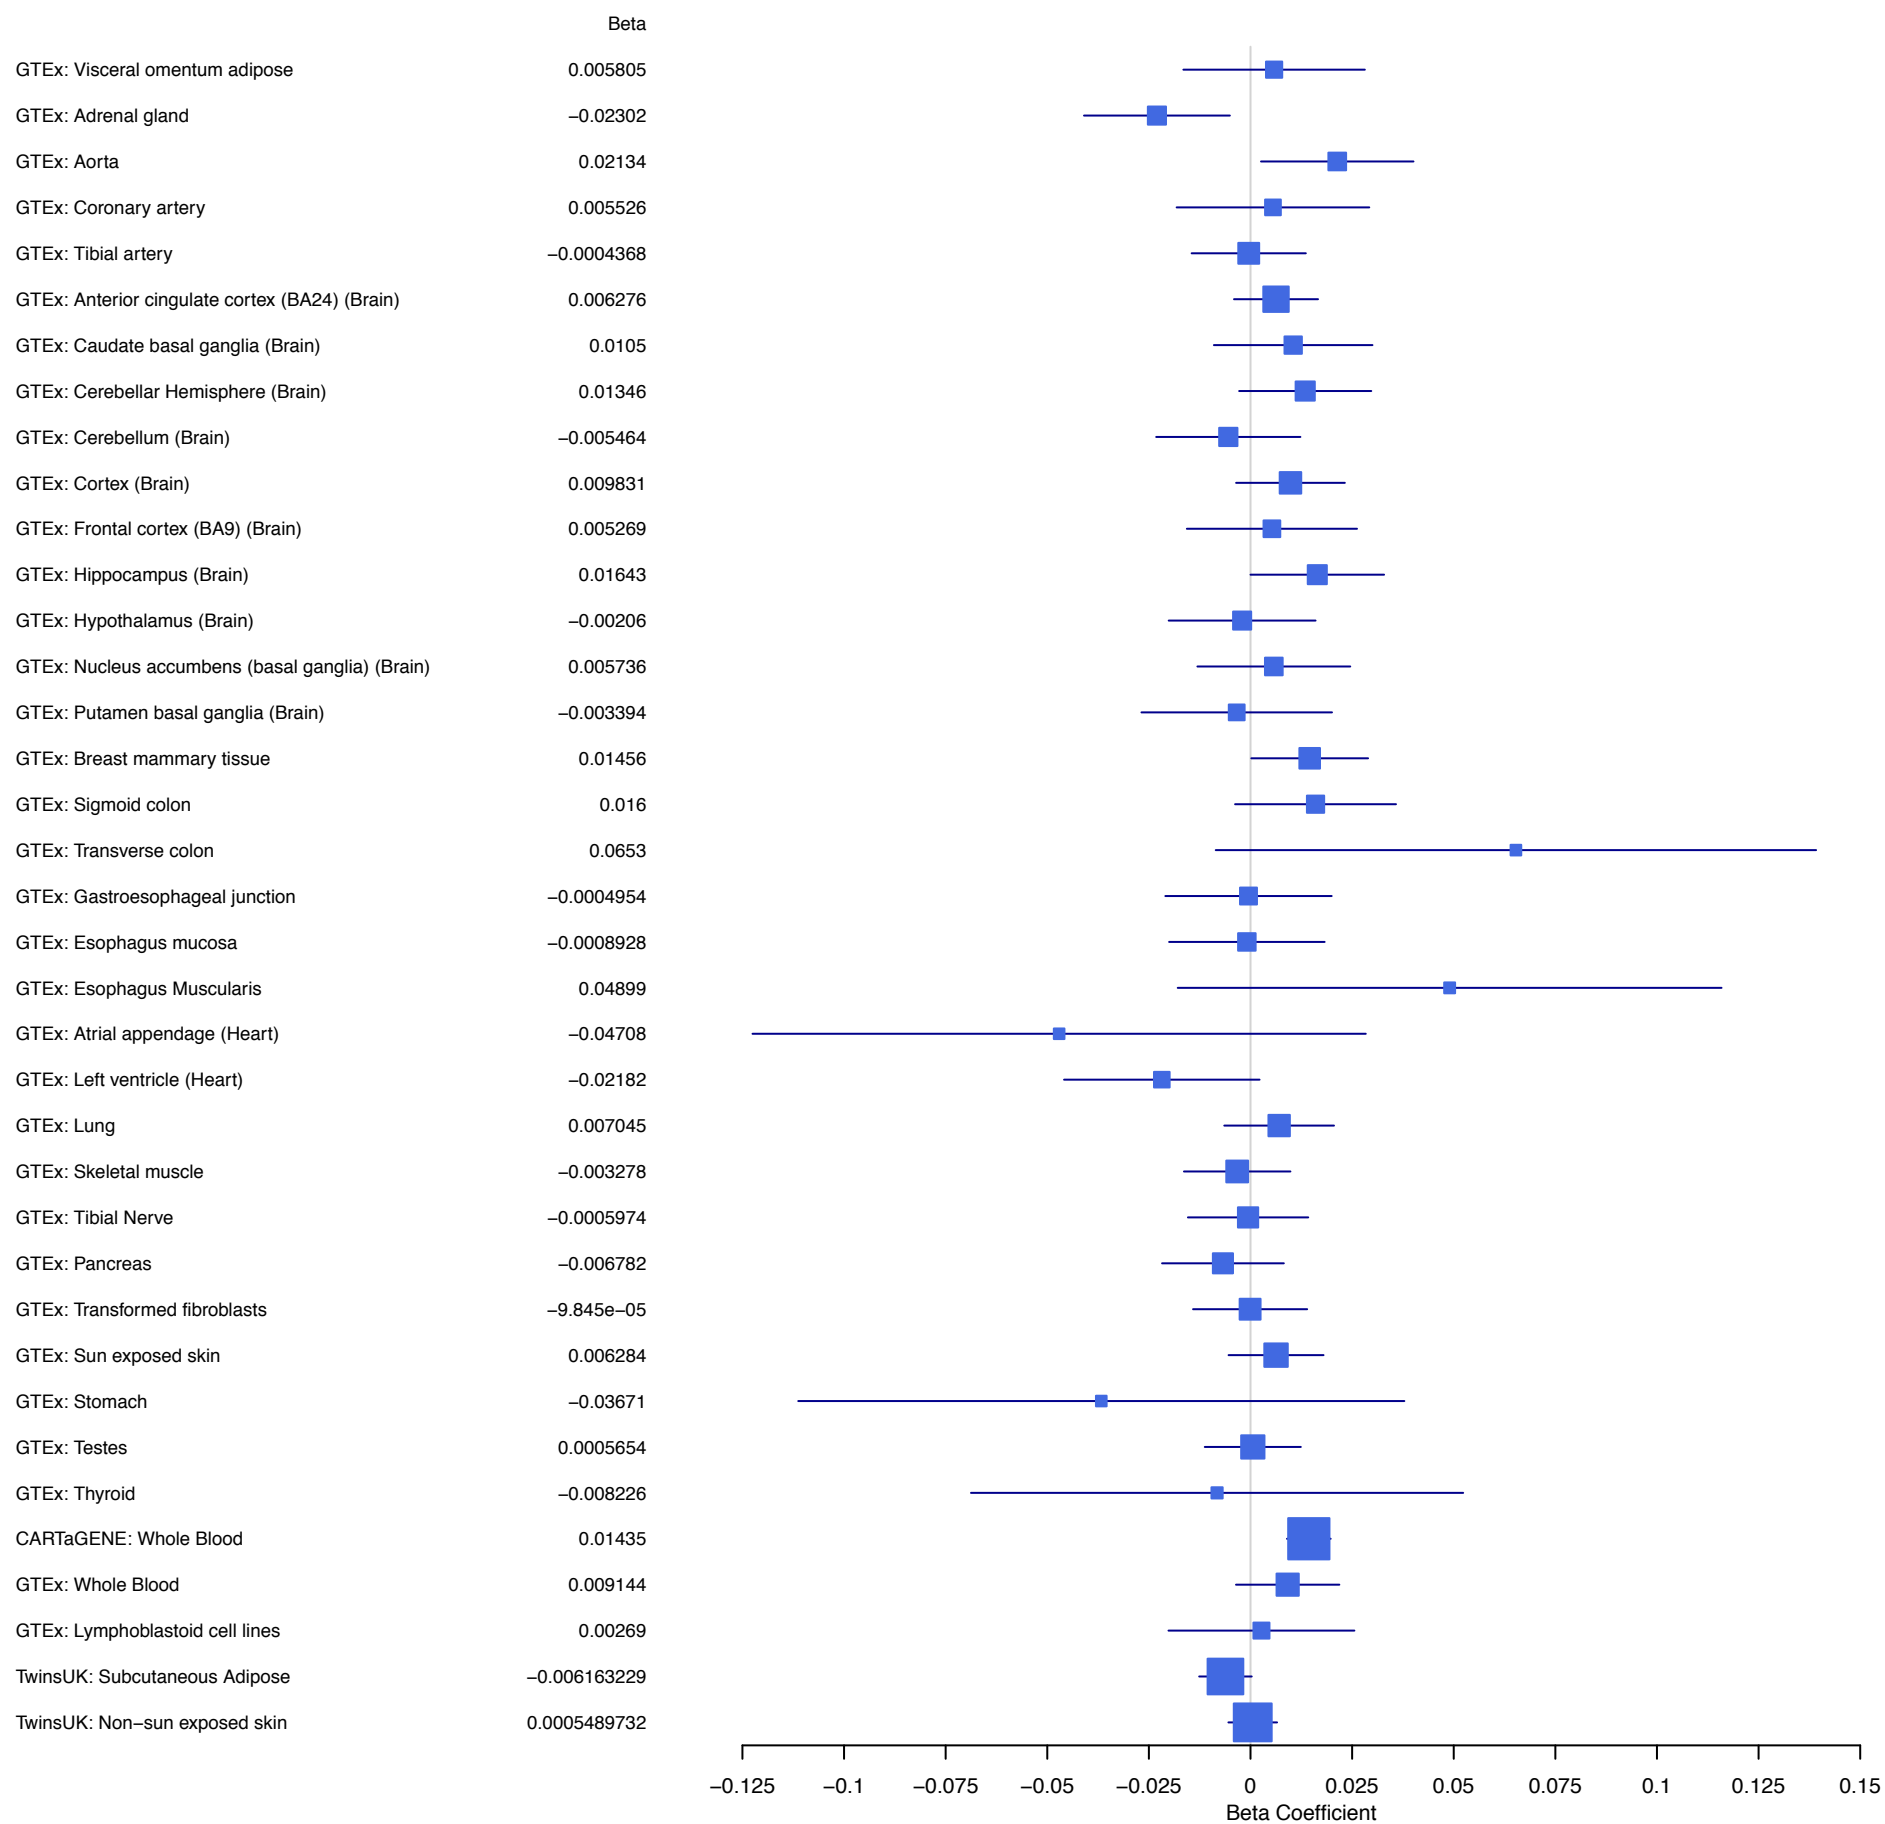

## rs74863981 : MTCO1

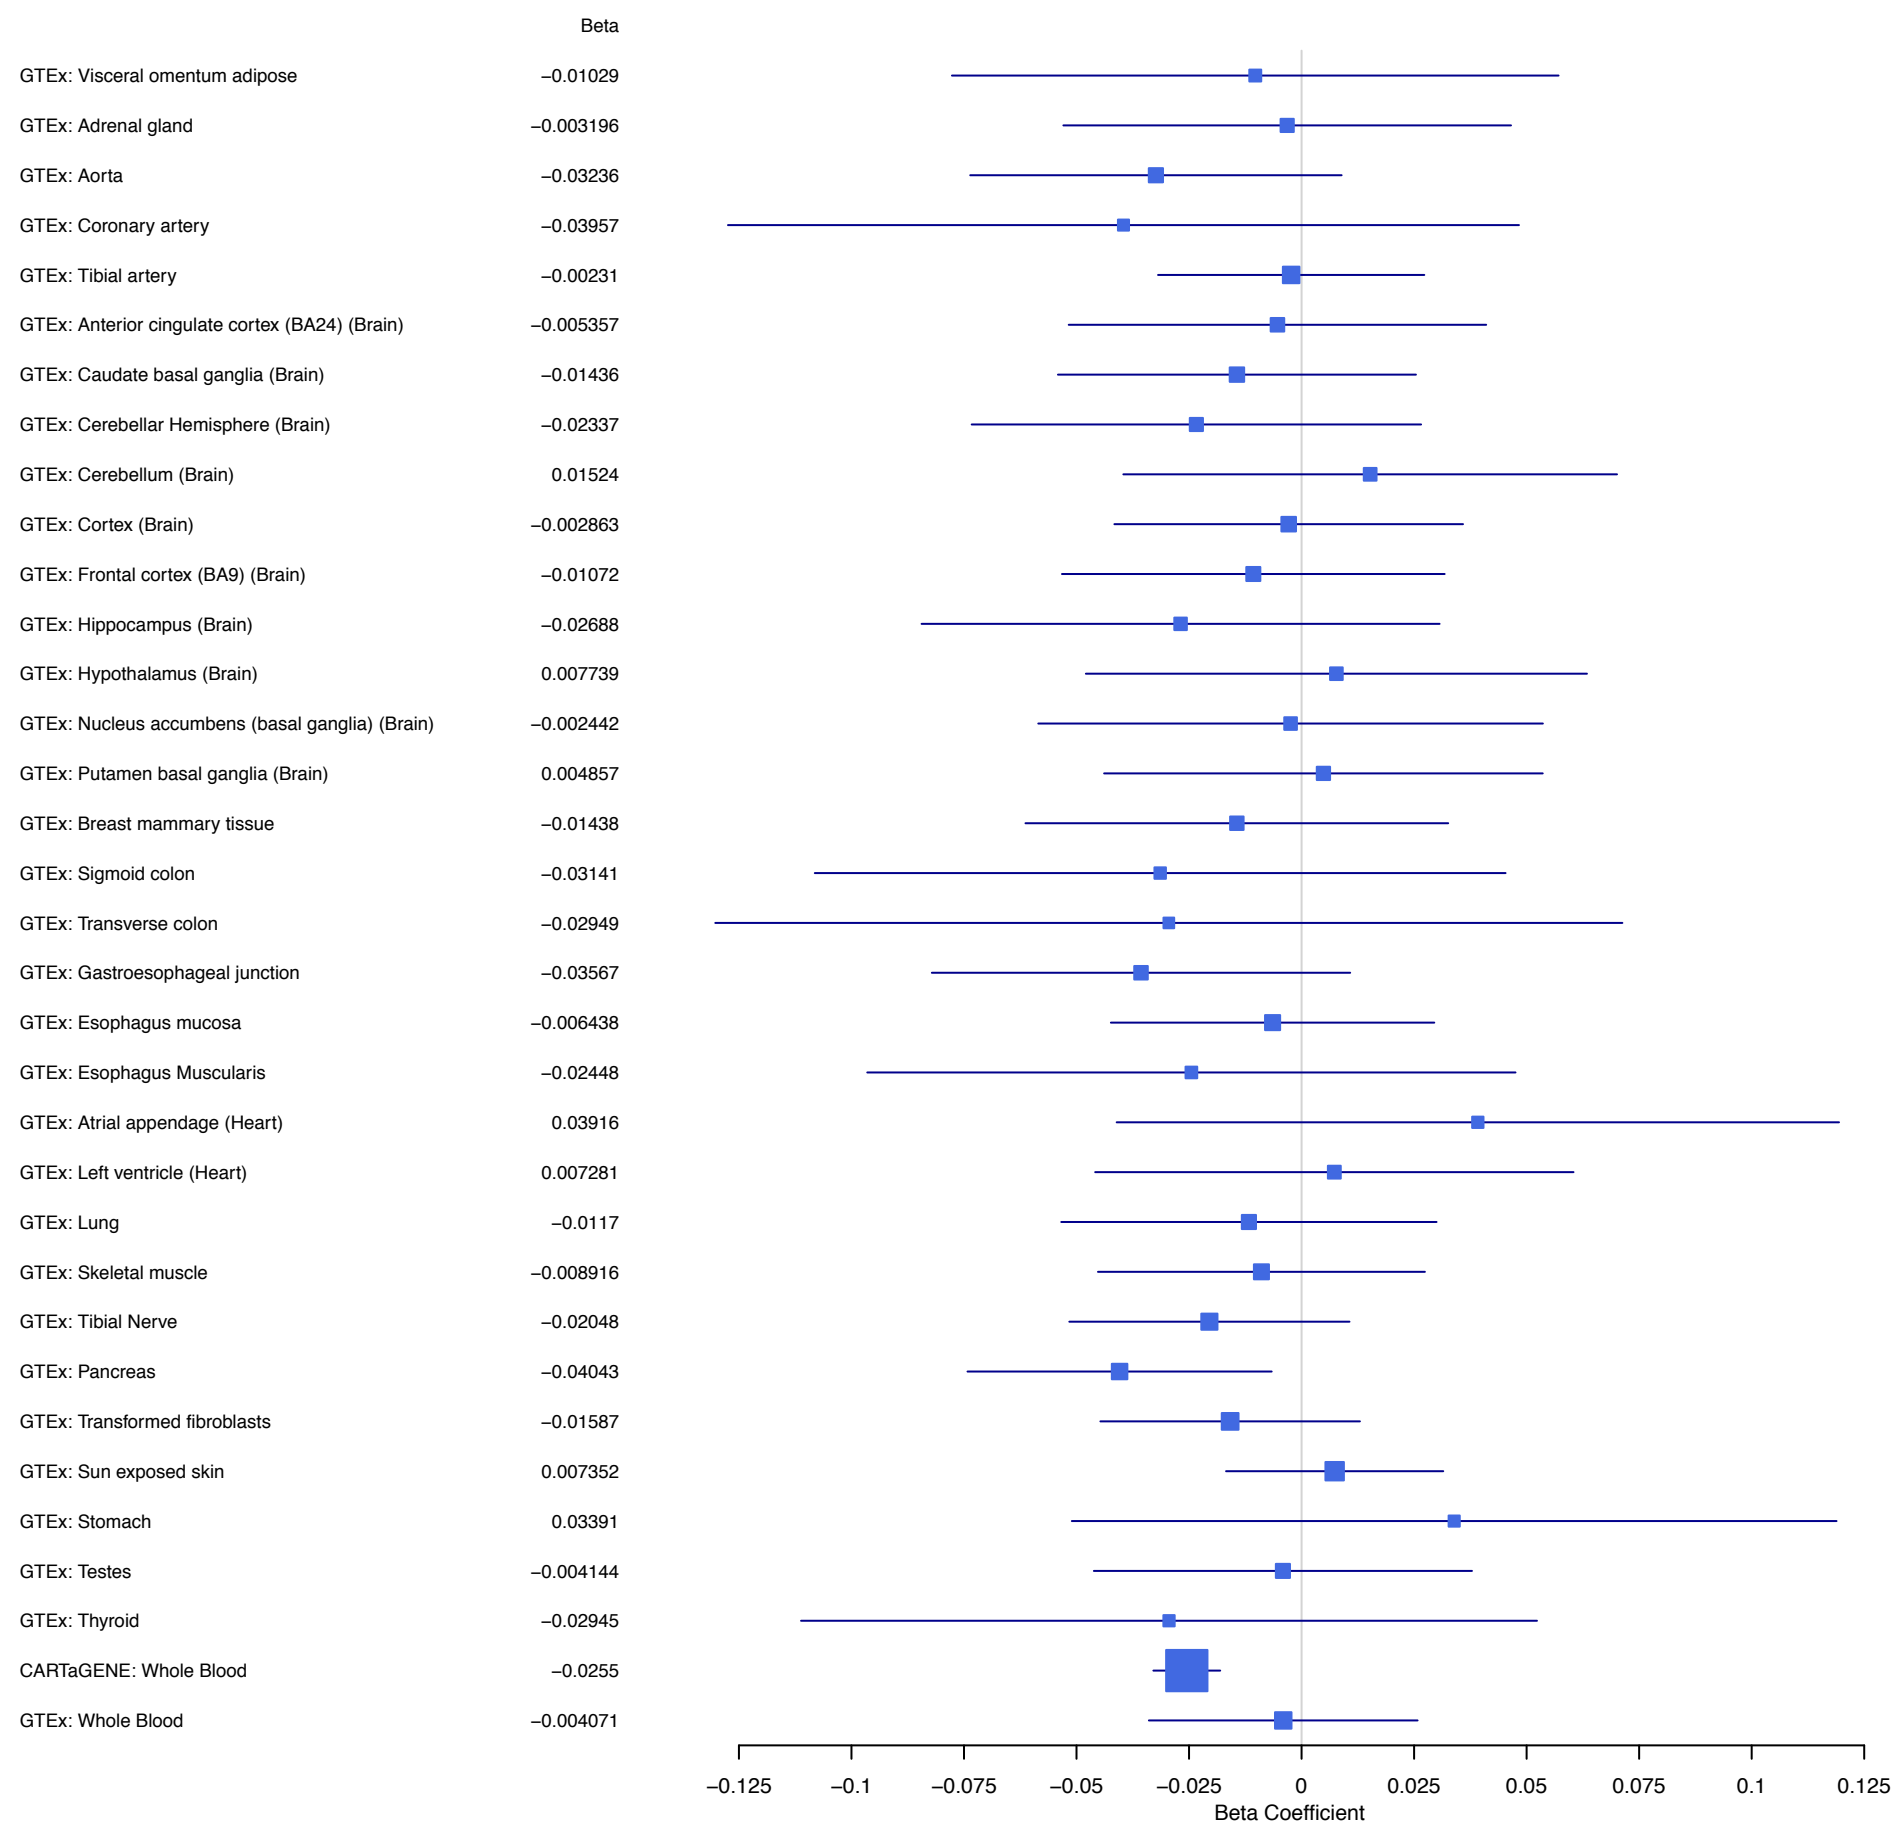

## rs75035374 : MTCO2

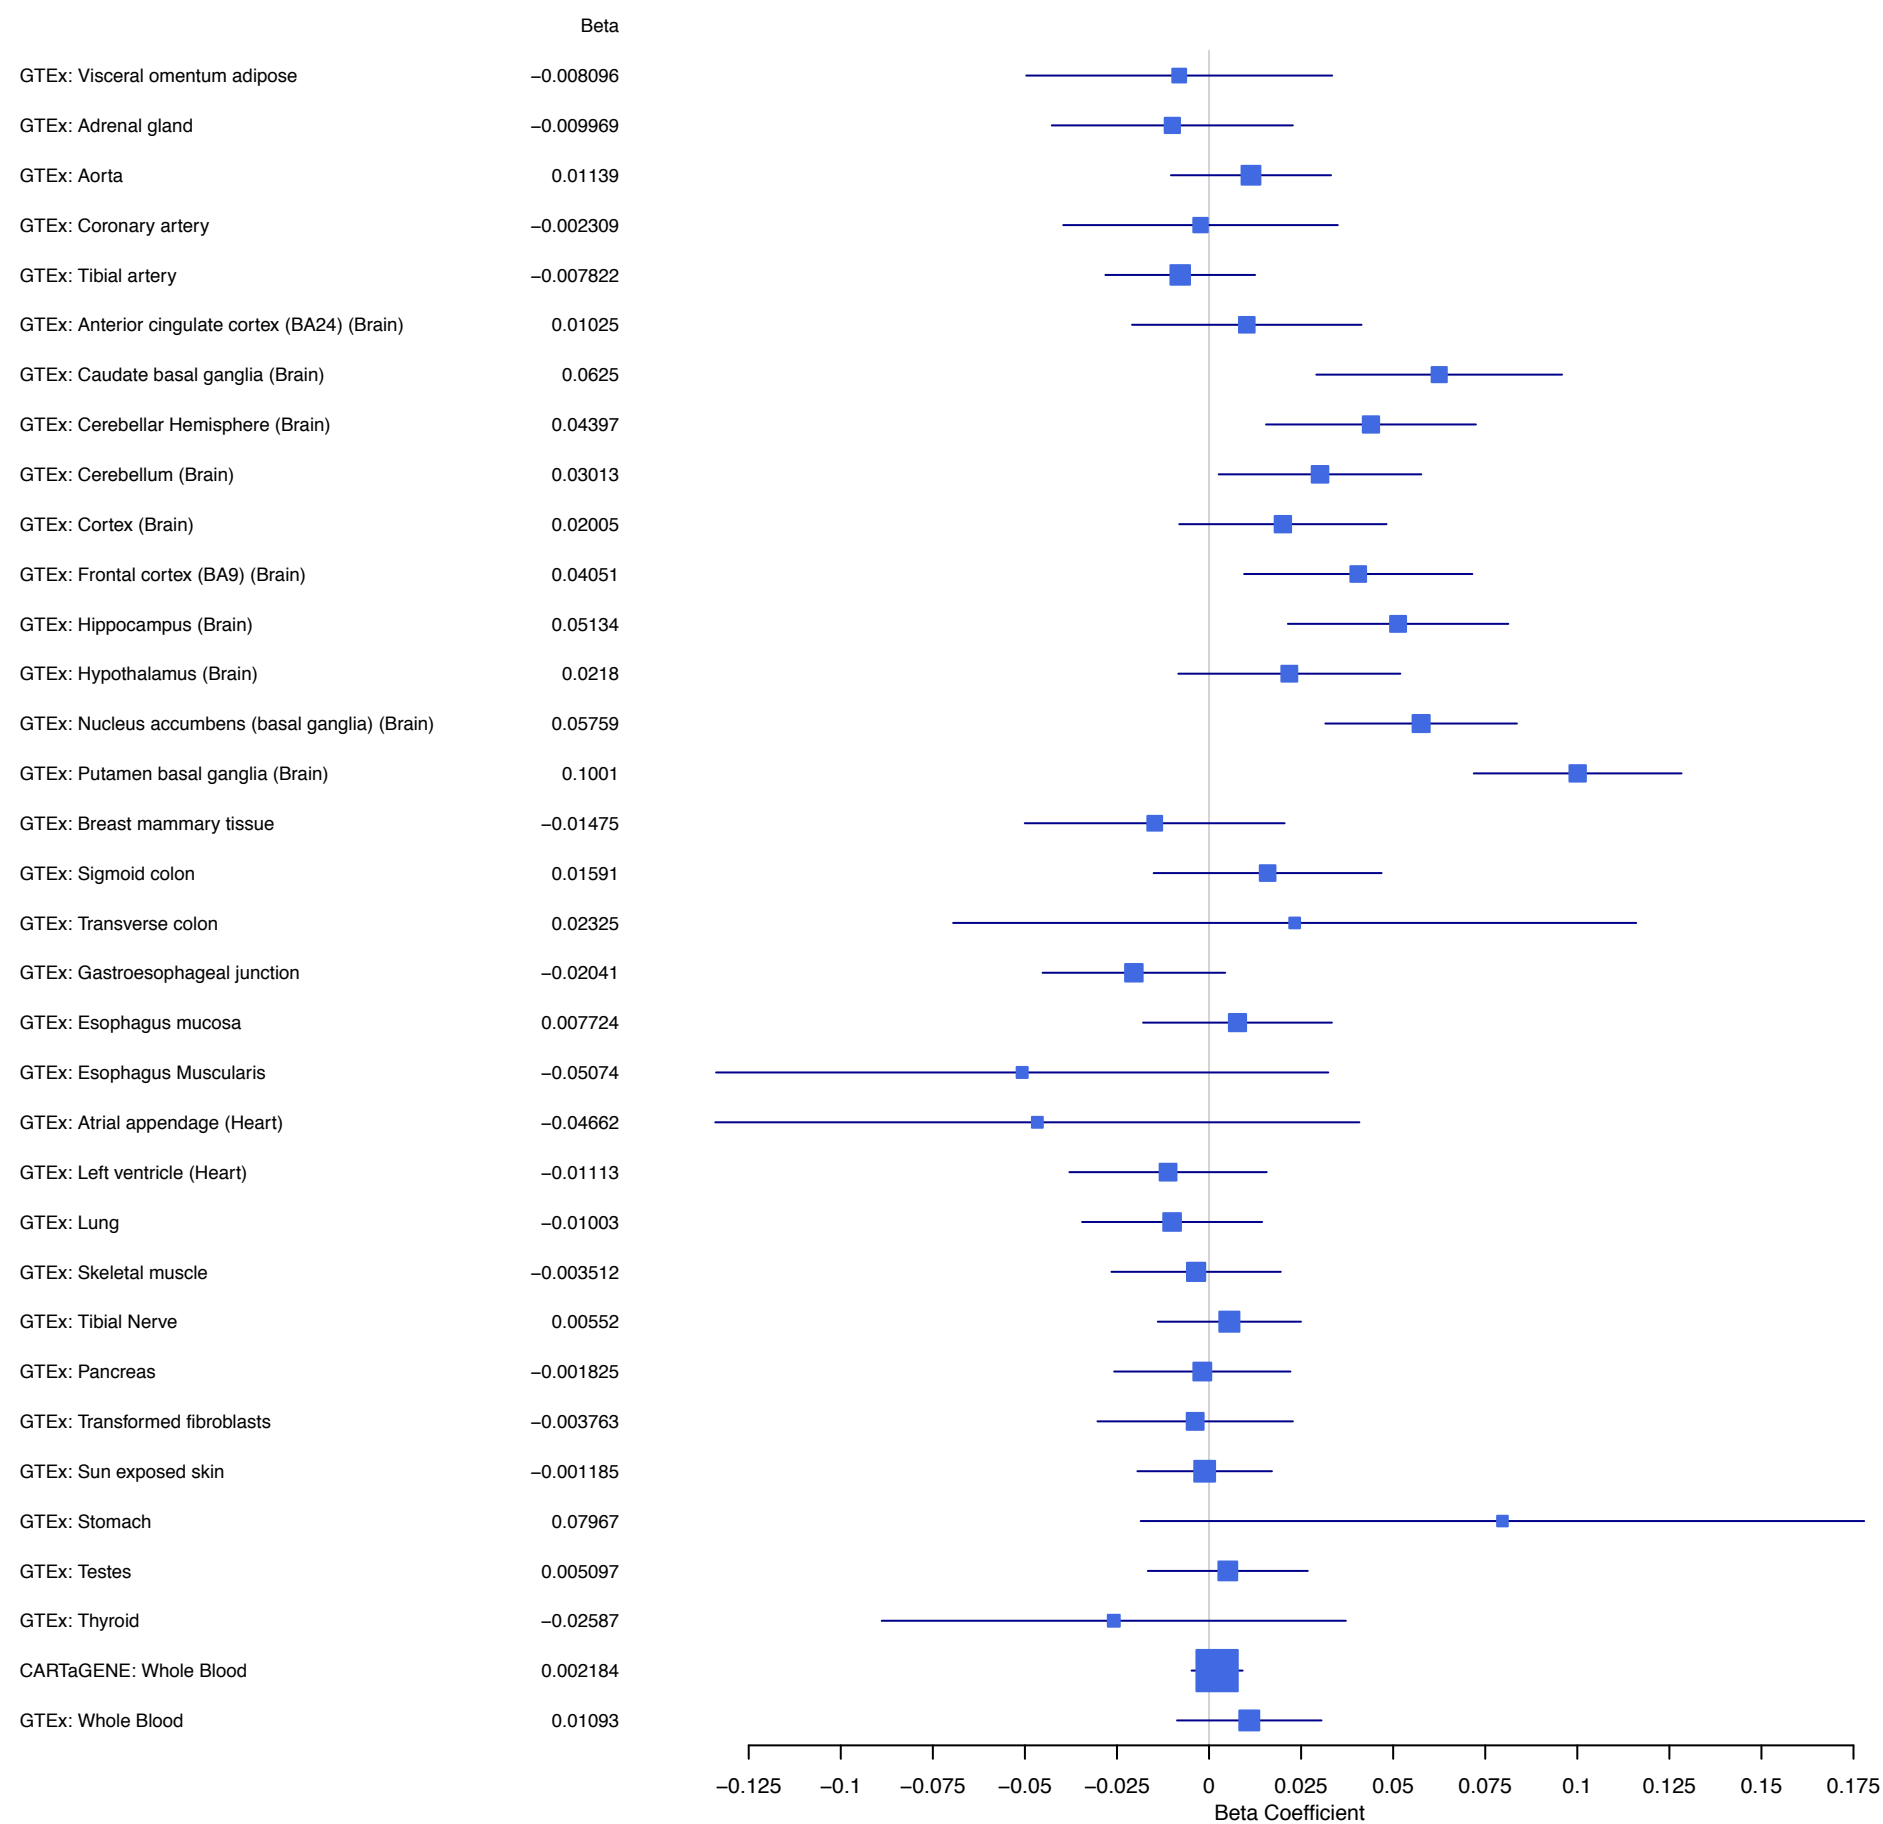

## rs75488794 : MTND6

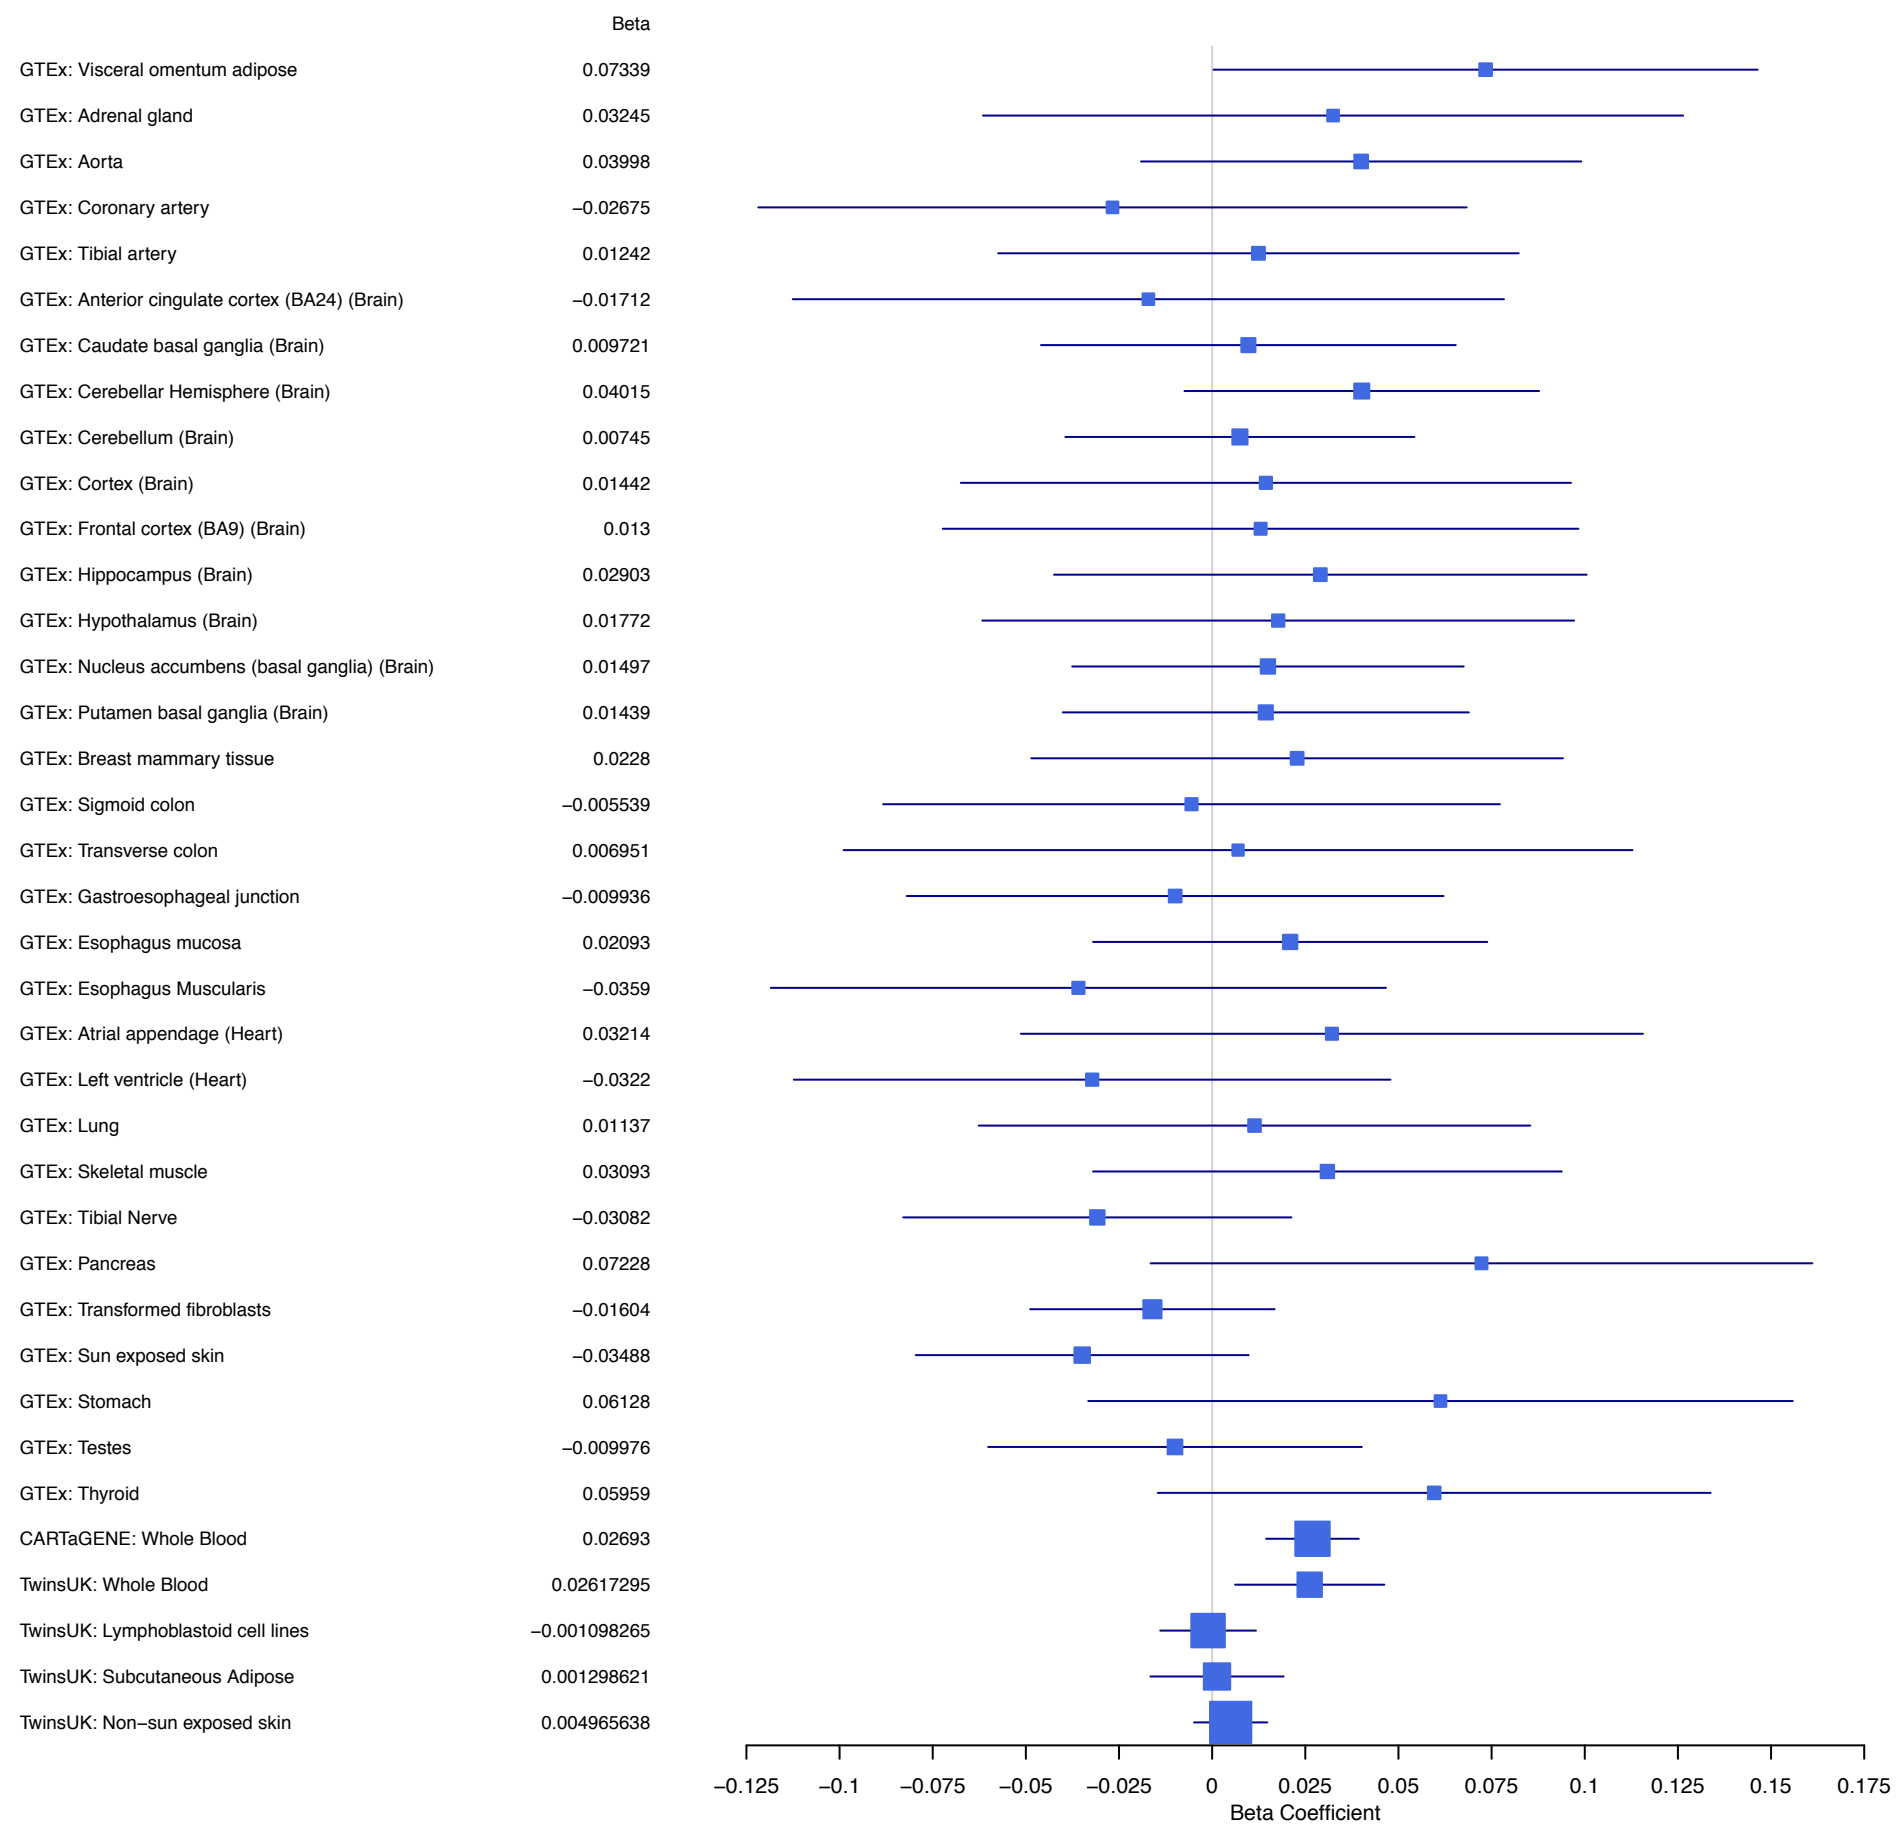

## rs76125482 : MTND3

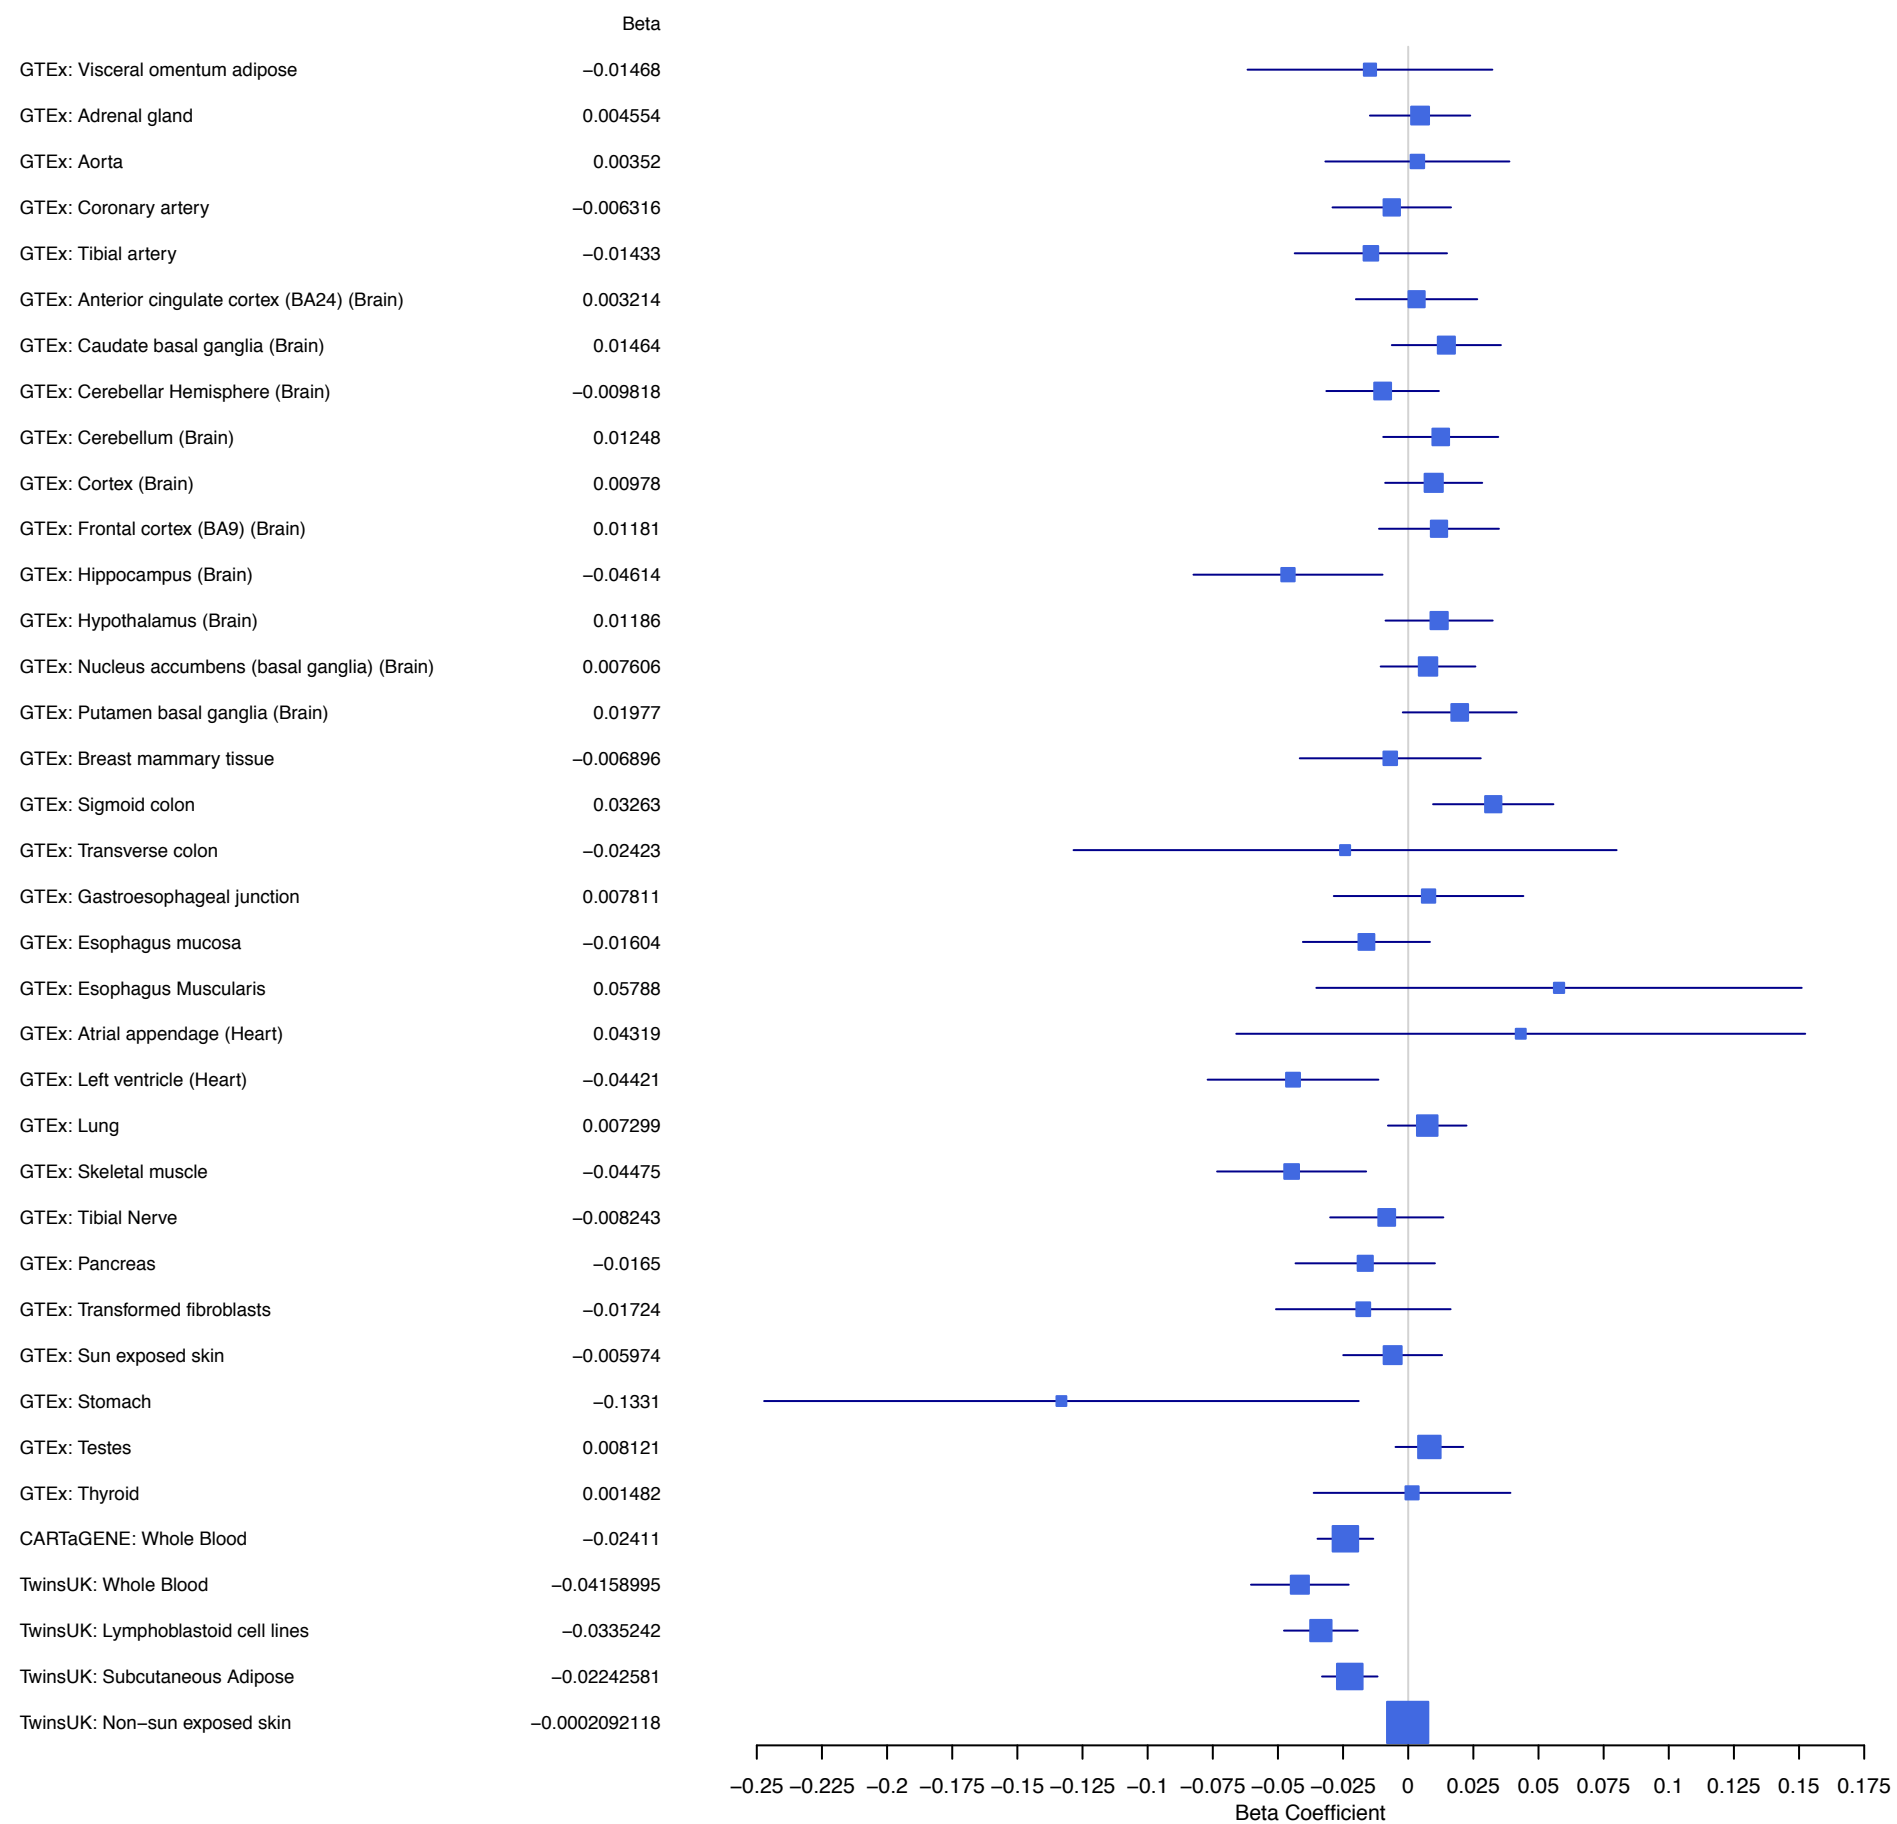

## rs78573873 : MTRNR1

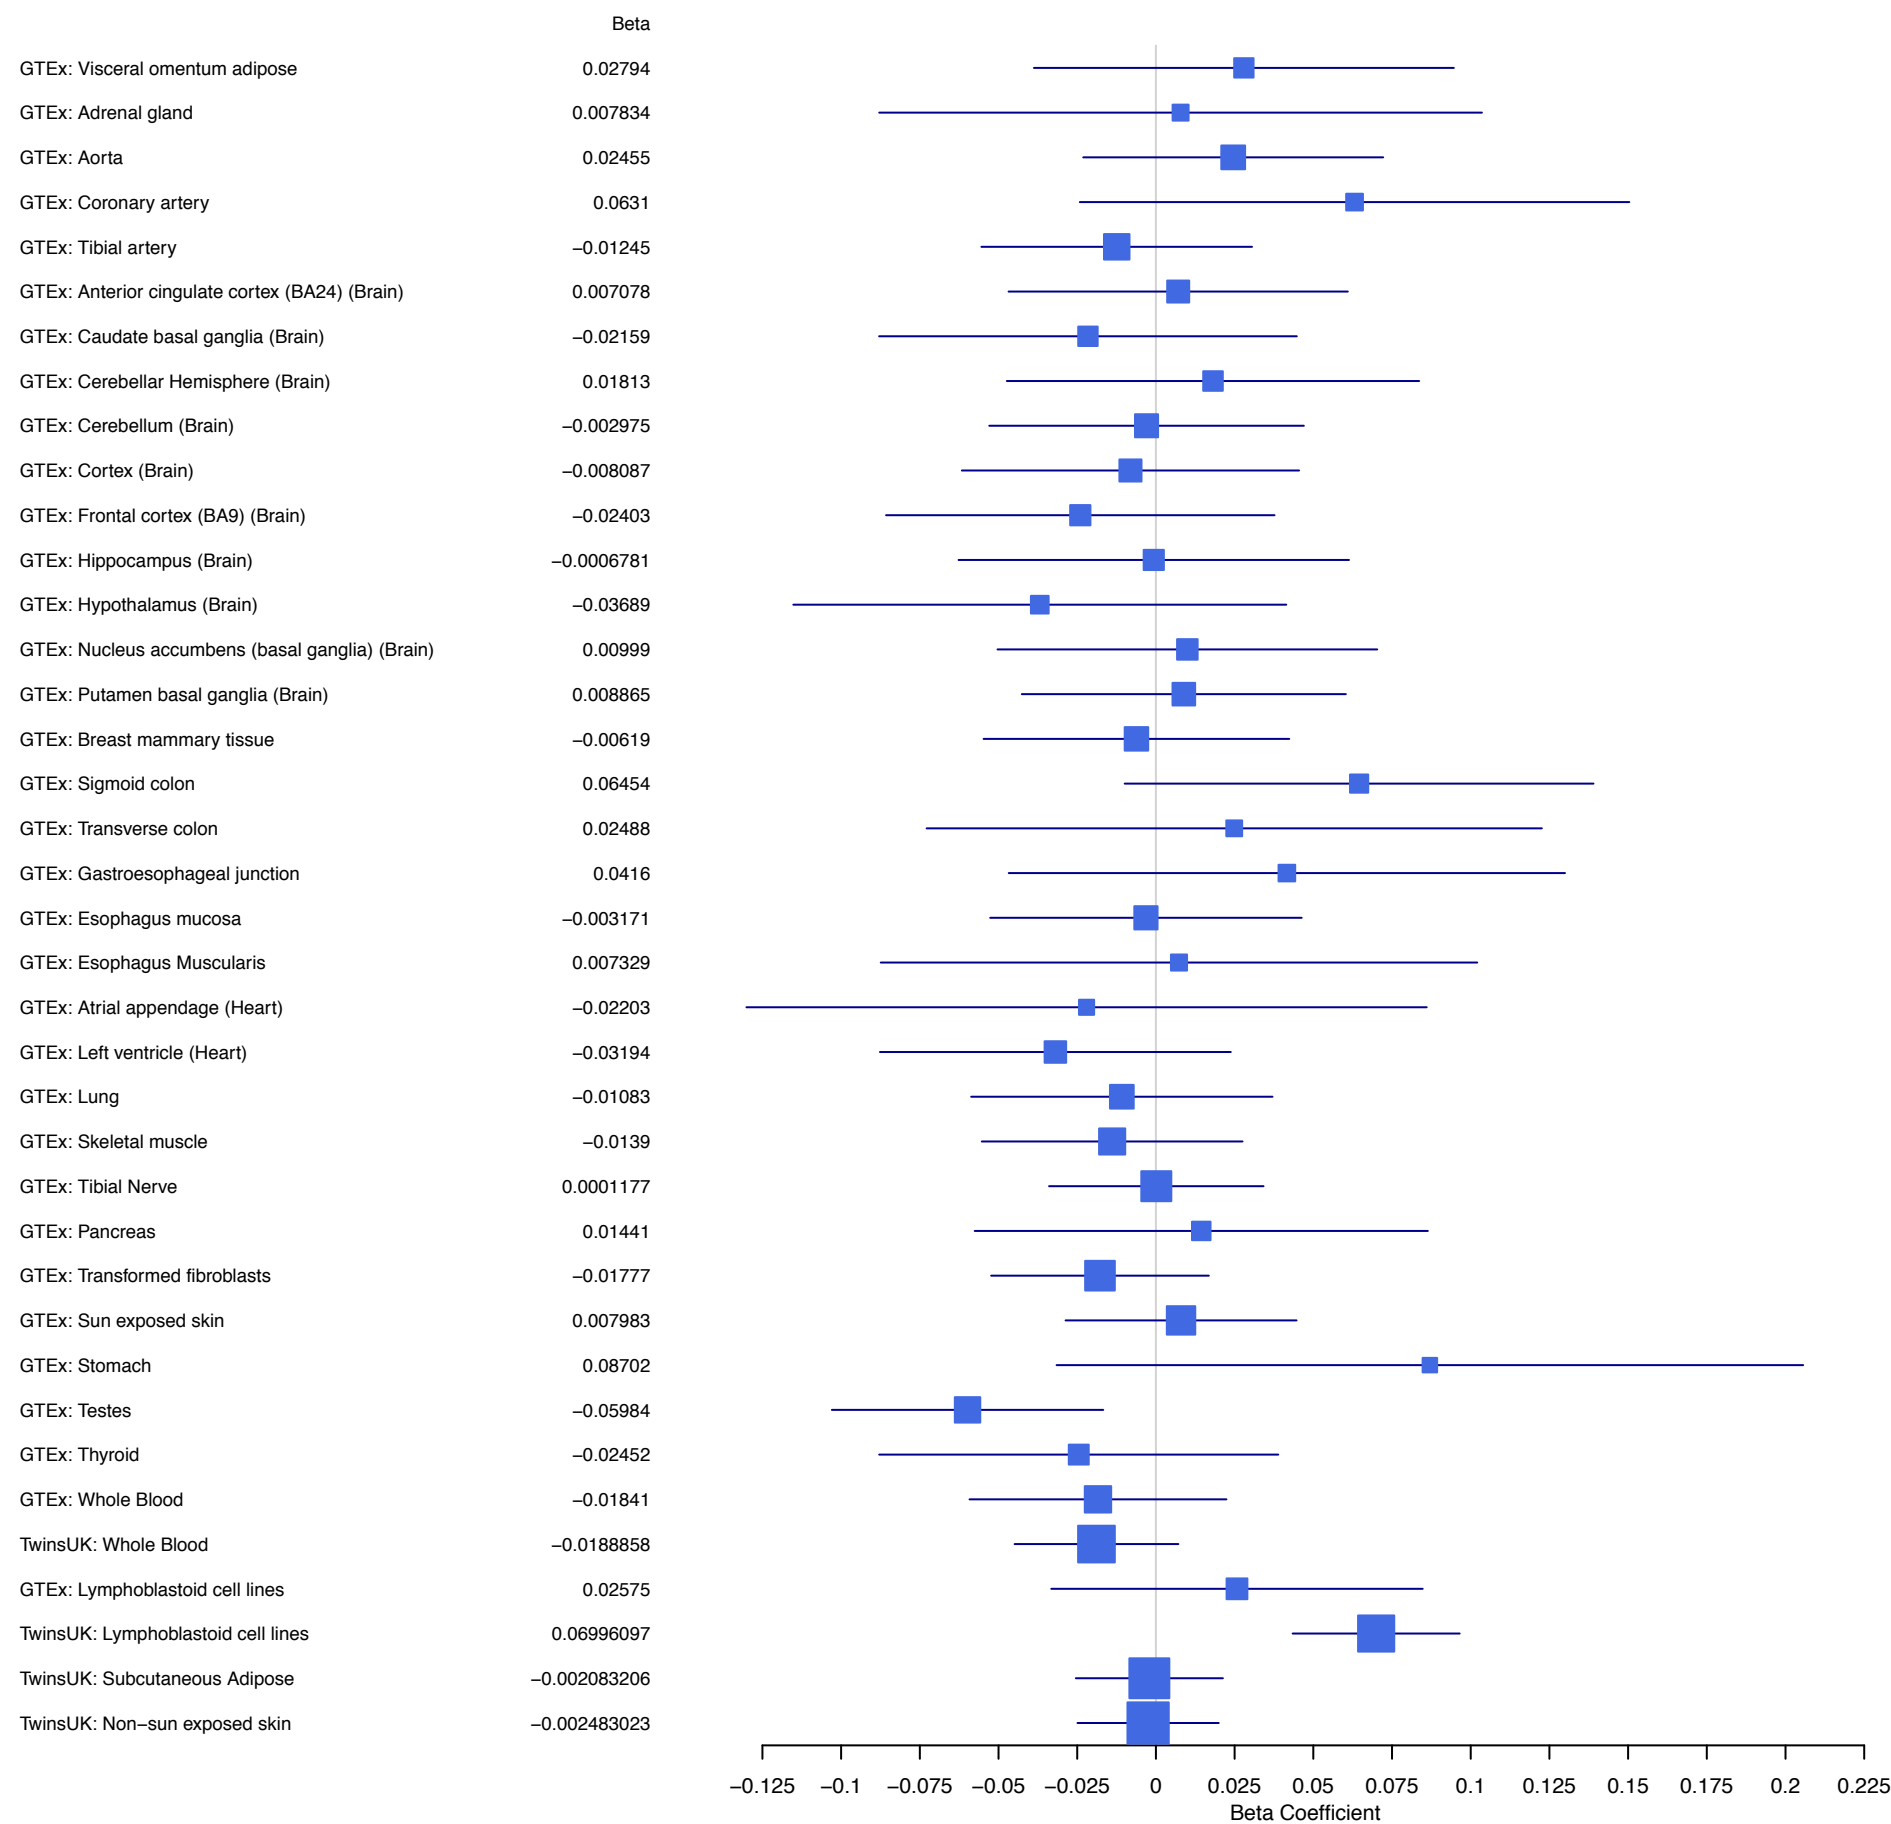

## rs140642797 : MTATP6

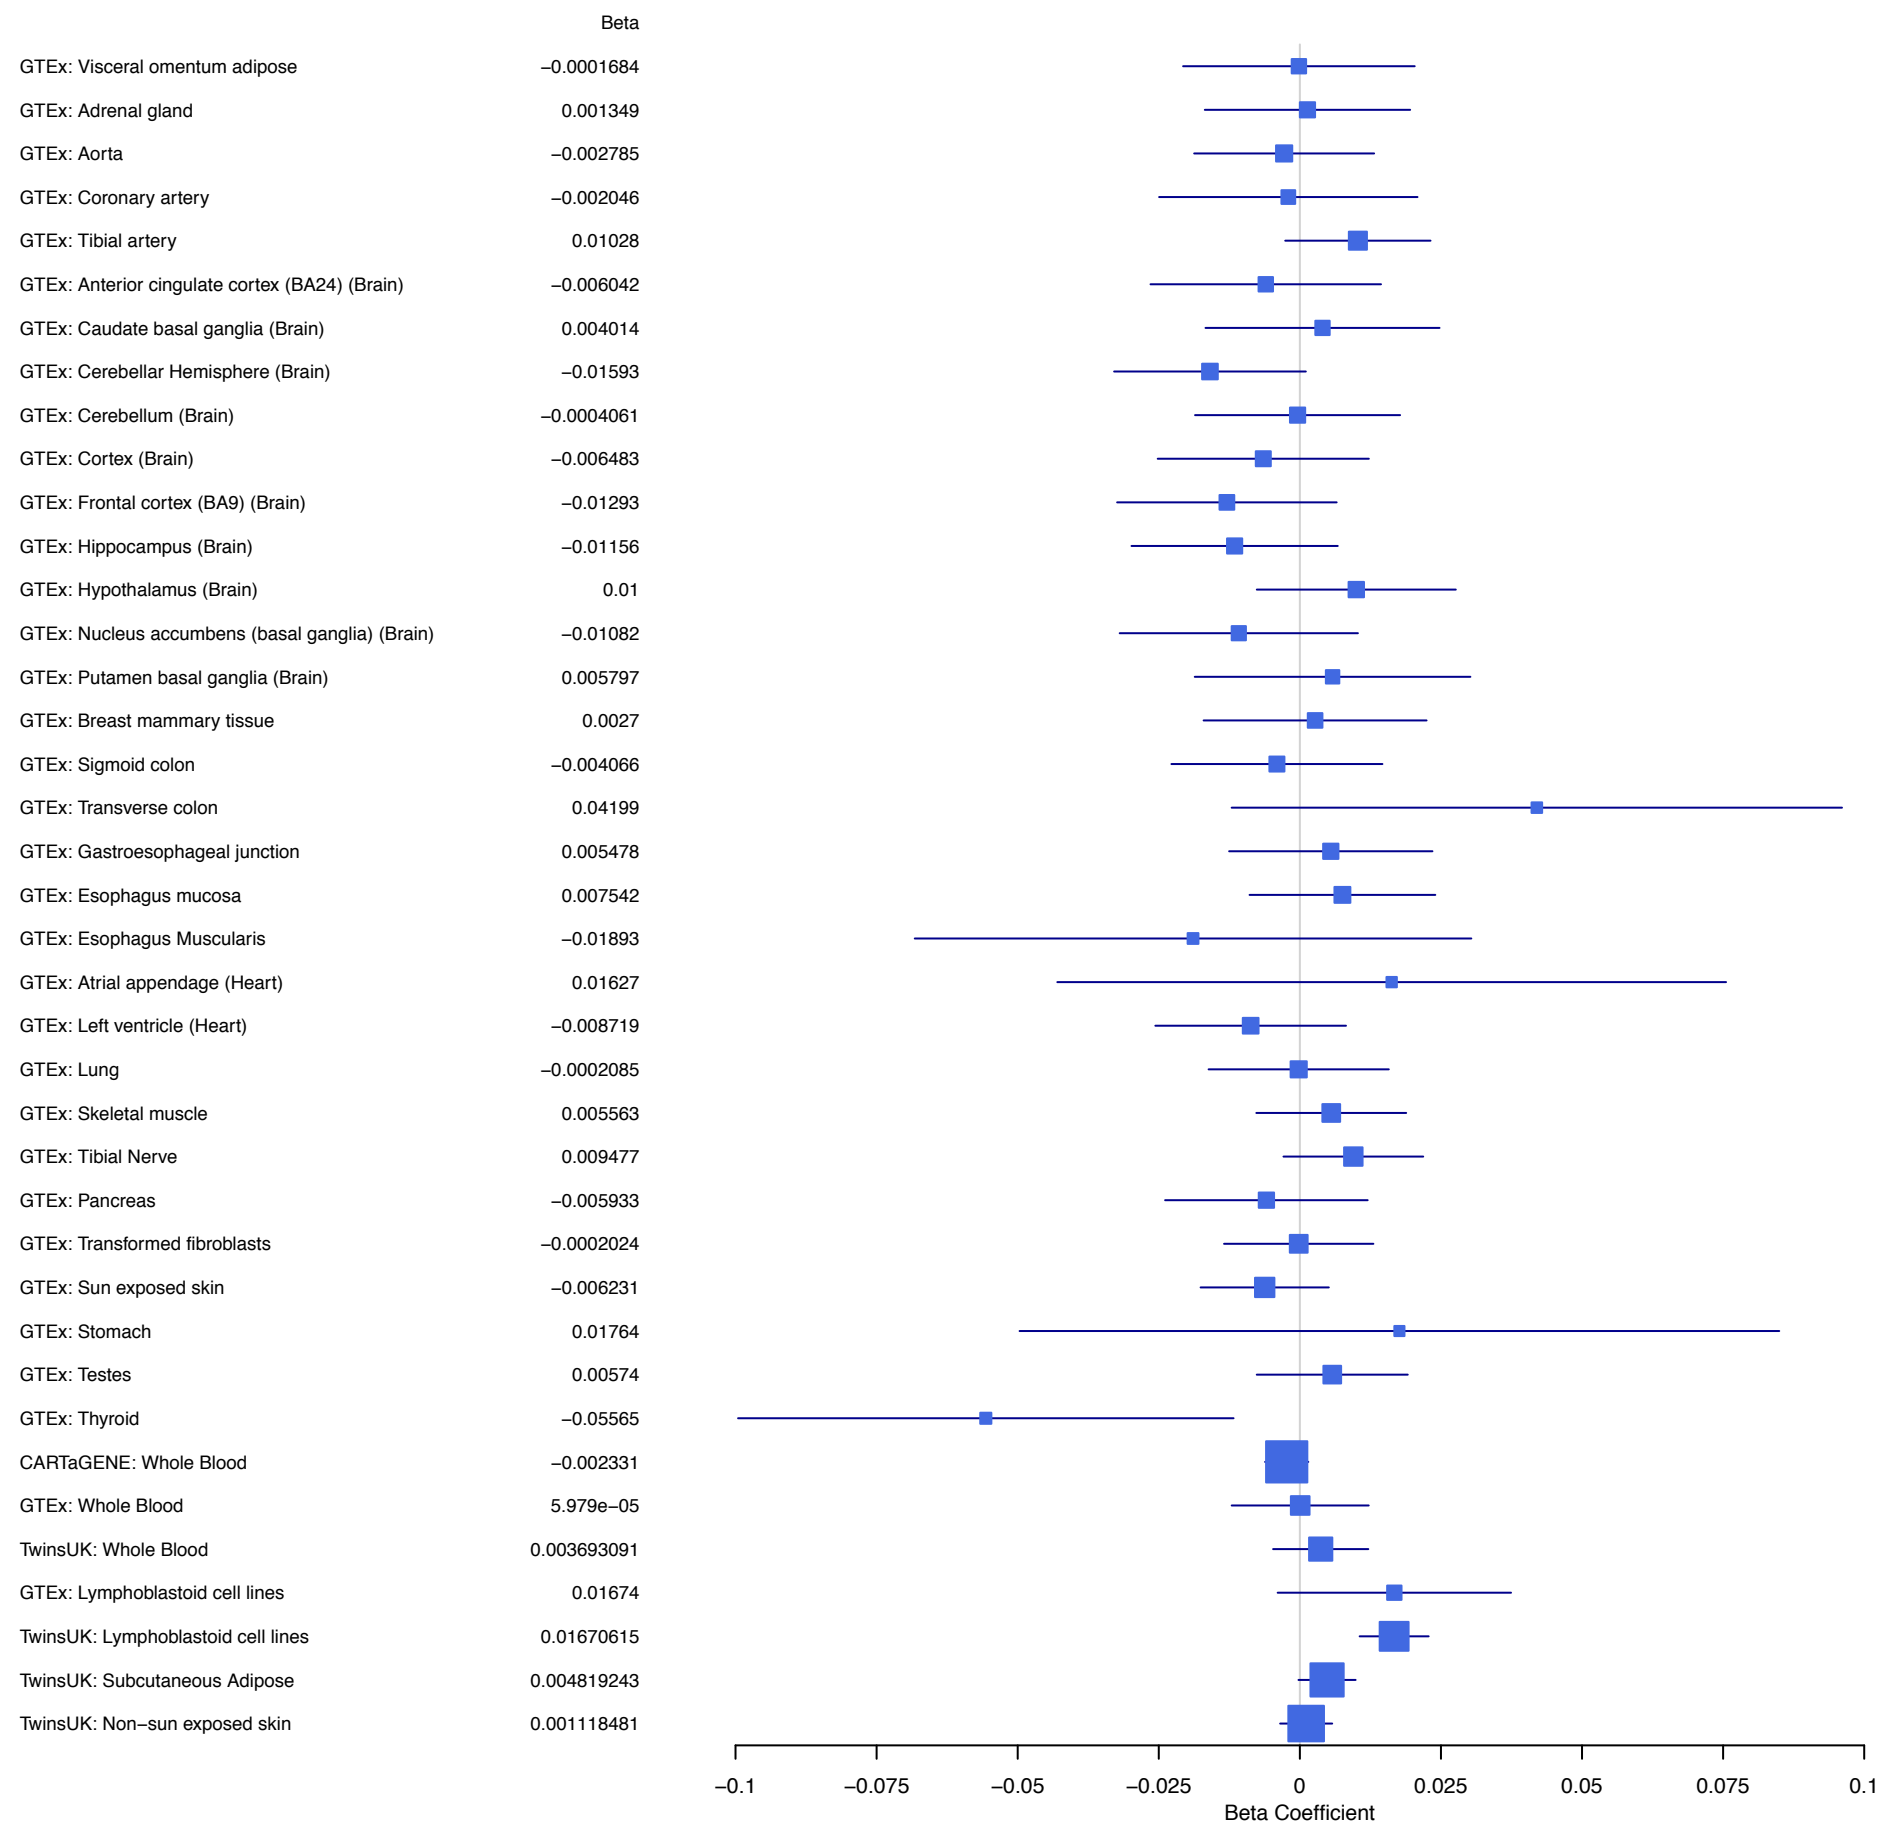

## rs375640557 : MTCO3

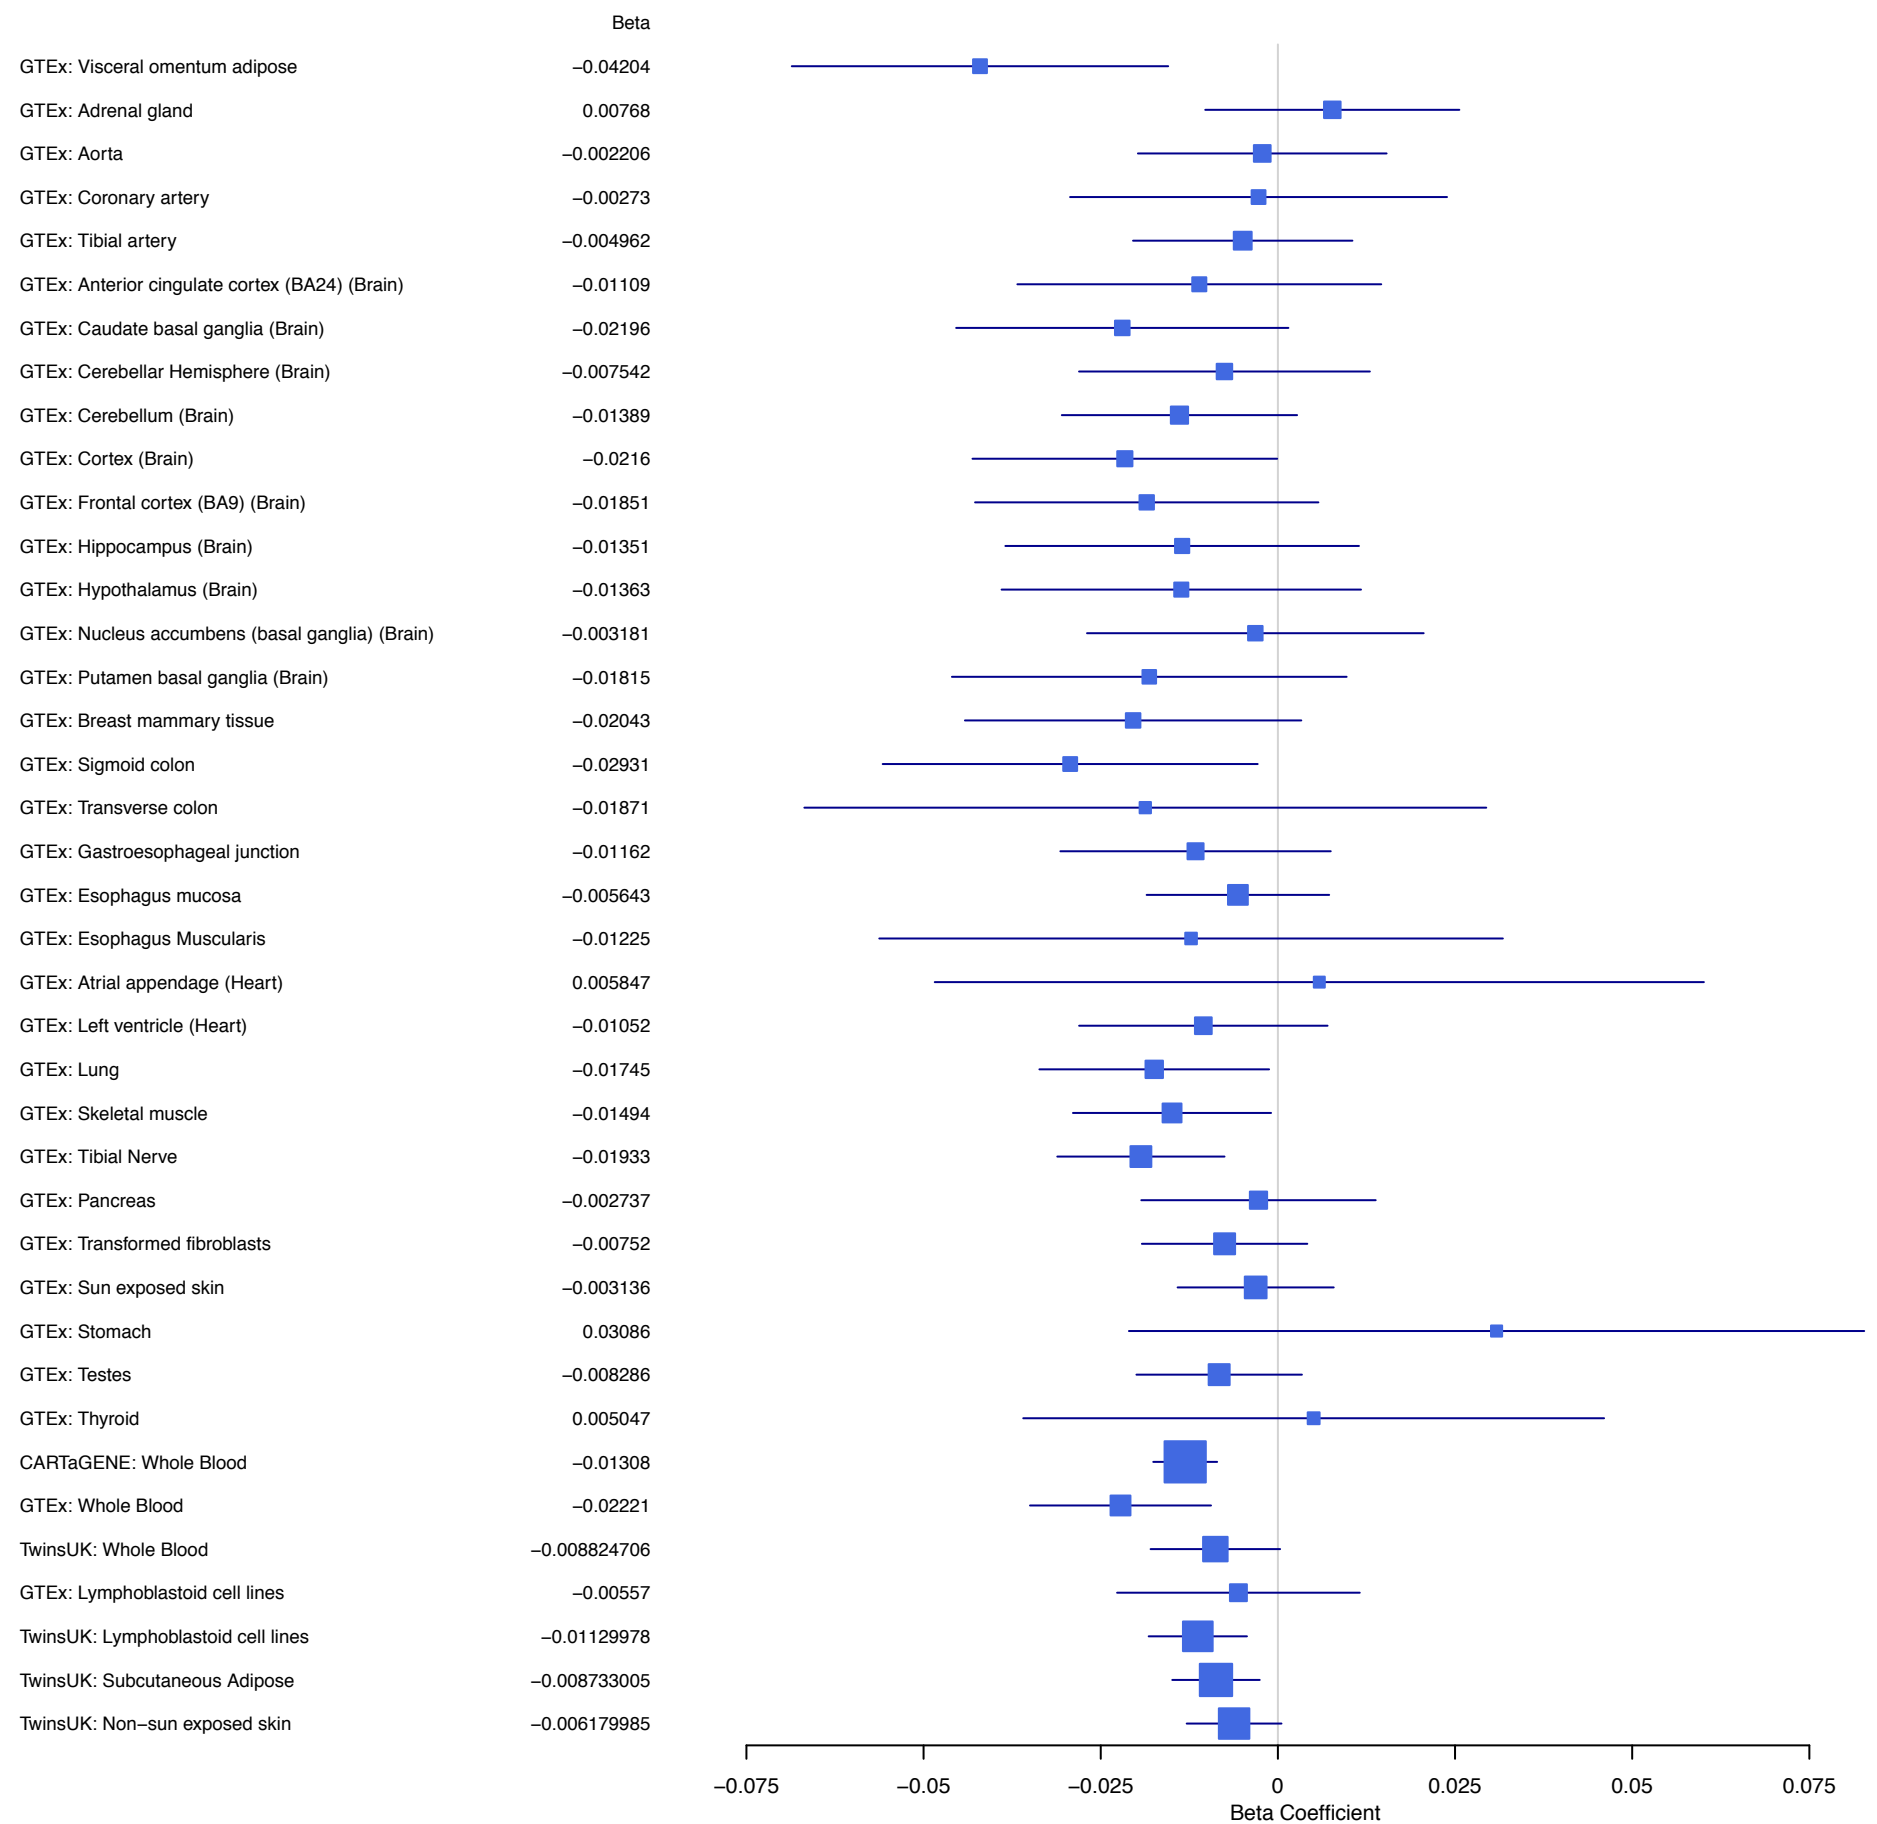

## rs589809 : MTATP6

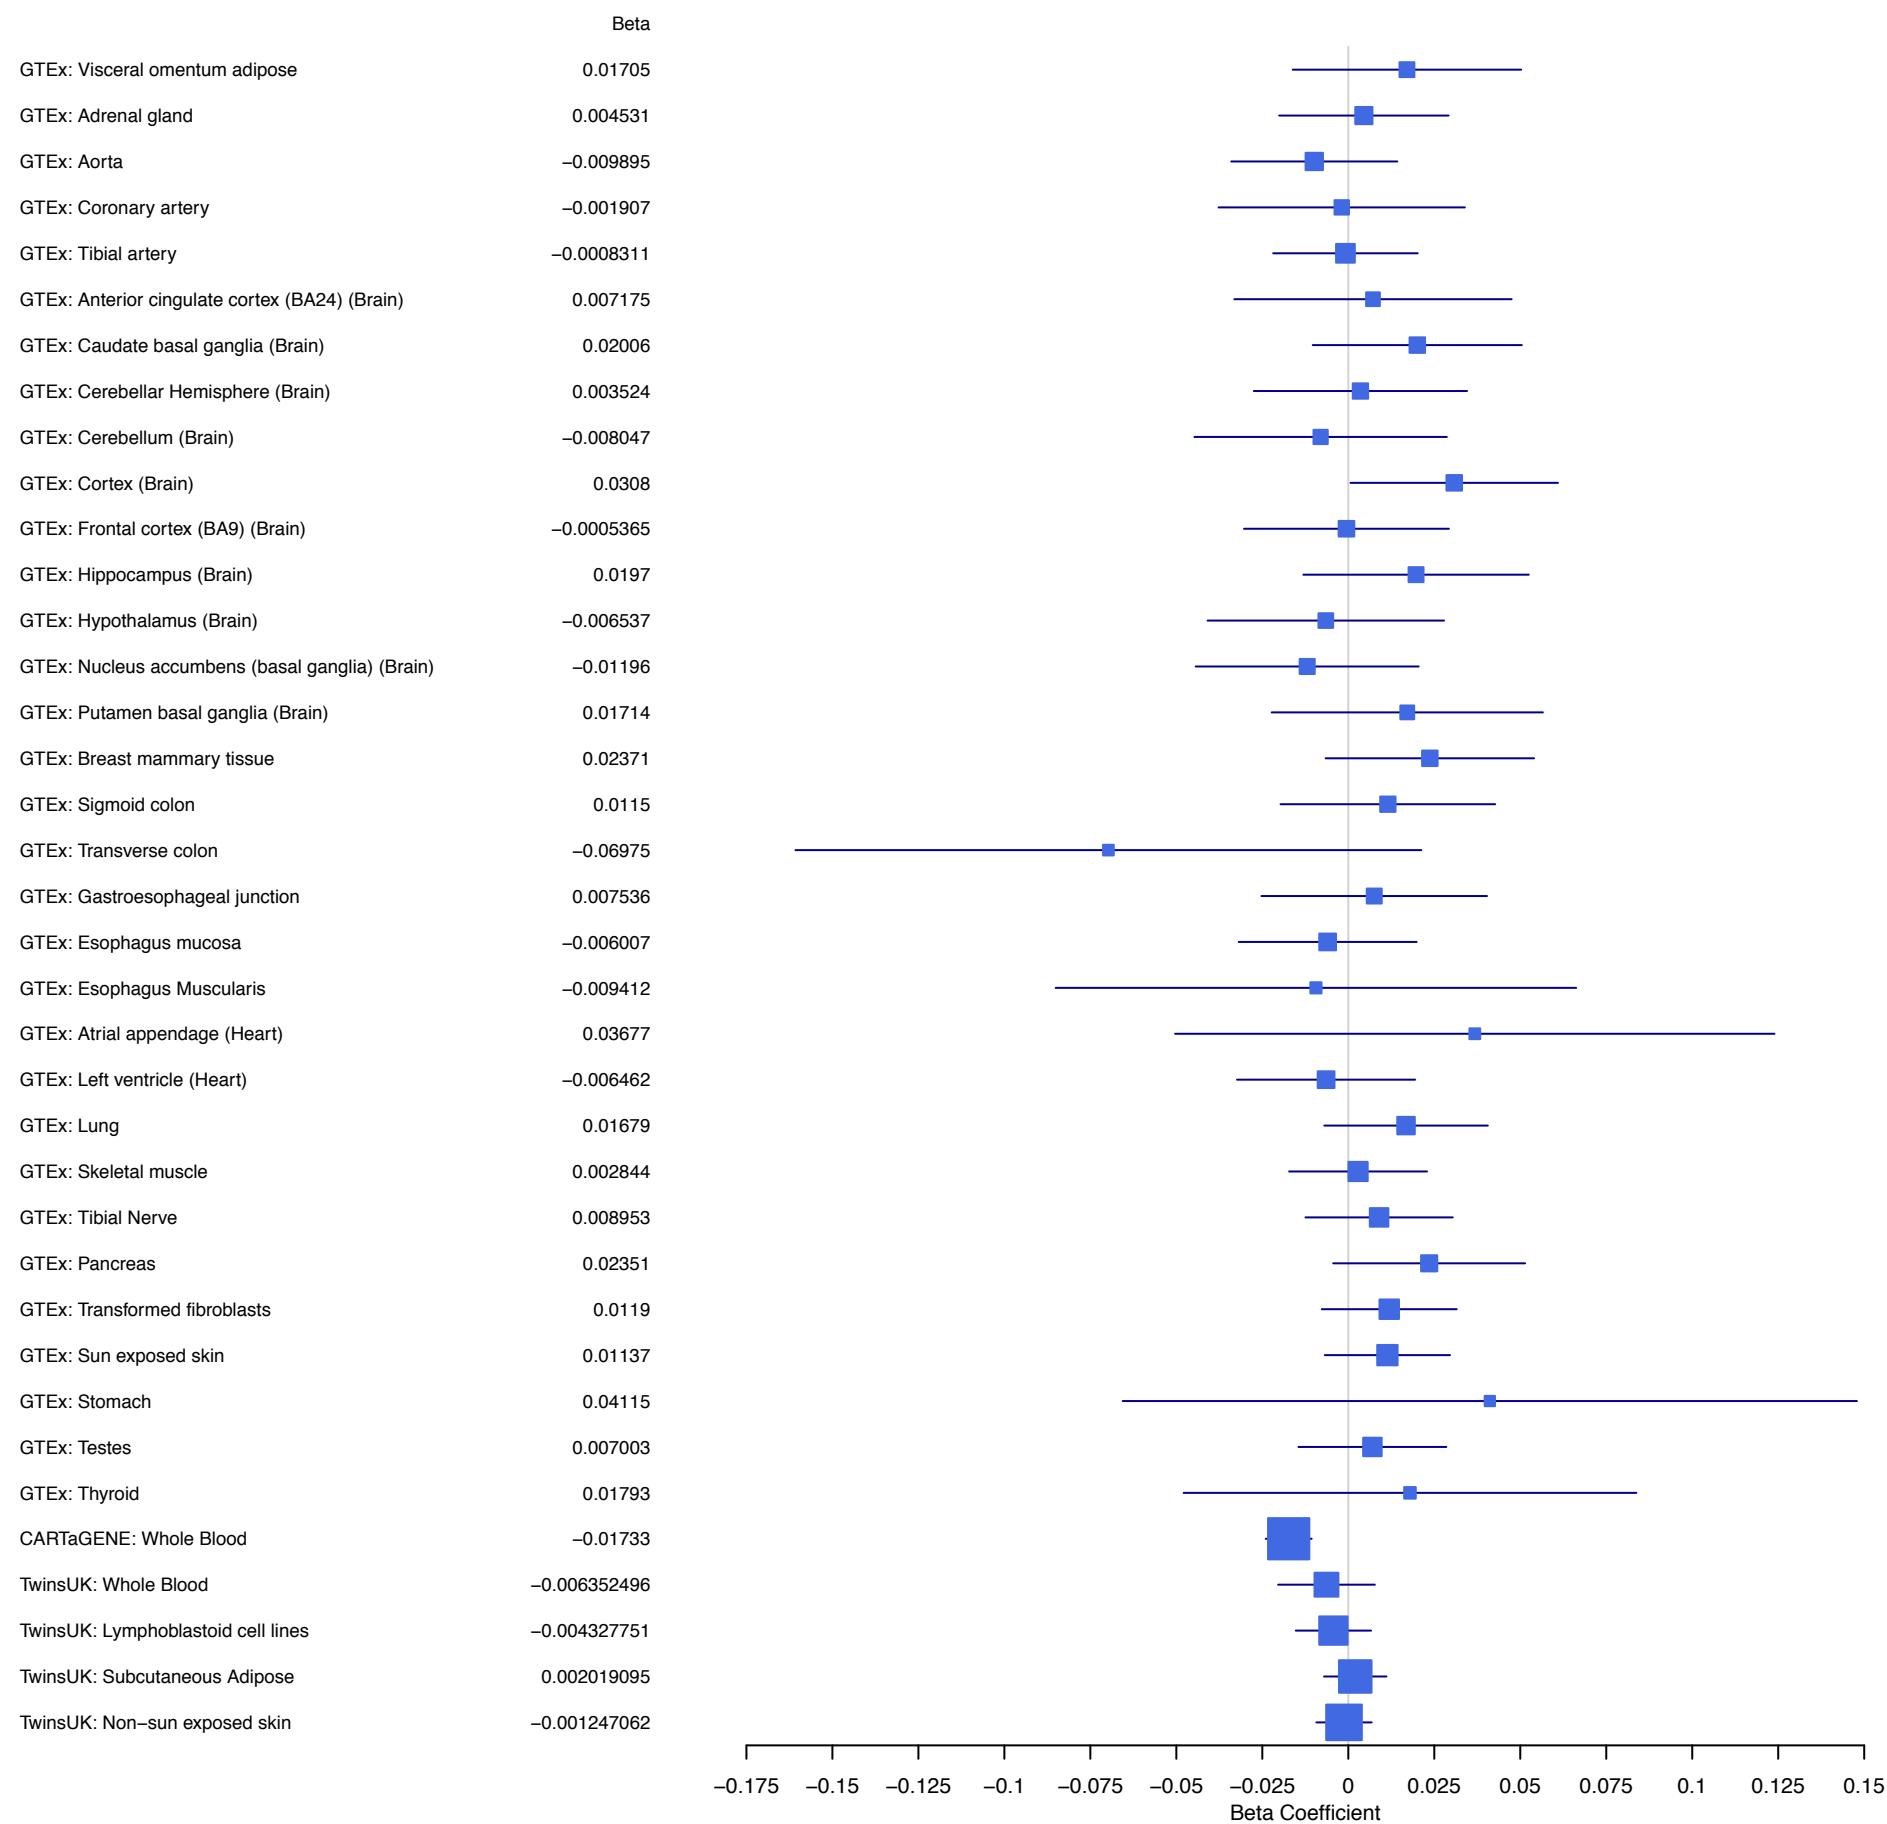

Supplement: supp [file elife-41927-supp-v1.zip › elife_poa_e41927_Figure_2_figure_supplement_1.pdf]
