# Supplementary material for: Nuclear genetic regulation of the human mitochondrial transcriptome
Source: eLife journal article supplement (doi:10.7554/elife.41927), 2019-02-18
Supplement: supp [file elife-41927-supp-v1.zip]

Archive with 8 entries (8 files):
- elife_poa_e41927_Figure_2_figure_supplement_1.pdf
- elife_poa_e41927_Supplementary_File_1.xlsx
- elife_poa_e41927_Supplementary_File_2.xlsx
- elife_poa_e41927_Supplementary_File_5.xlsx
- elife_poa_e41927_Supplementary_File_3.xlsx
- elife_poa_e41927_Transparent_Reporting_File.pdf
- elife_poa_e41927_Supplementary_File_4.xls
- elife_poa_e41927_Figure_2_figure_supplement_2.pdf
