# Supplementary material for: Nuclear genetic regulation of the human mitochondrial transcriptome
Source: eLife journal article supplement (doi:10.7554/elife.41927), 2019-02-18
Supplement: supp [file elife-41927-supp-v1.zip › elife_poa_e41927_Supplementary_File_1.xlsx]

## Sheet: Legend
Supplementary File 1: Significant associations between nuclear genetic variants and the expression levels of genes encoded in the mitochondrial genome. See methods for a description of the calculation of different permutation P values.

## Sheet: File S1
Tissue	Peak Nuclear SNP	Chromosome	Position	A1	MAF	MT Gene	P Value	P value (FDR corrected)	P Value (Permutation, pointwise)	P Value (Permutation, pointwise, extrapolated from beta-distribution)	P Value (Permutation, gene-level FWER)	P Value (Permutation, gene-level FWER, extrapolated from beta-distribution)	P Value (Permutation, tissue-level FWER)	P Value (Permutation, tissue-level FWER, extrapolated from beta-distribution)	Beta	Replication P value	Replication Beta	Nuclear Gene Annotation	Nuclear SNP Annotation
Whole Blood	rs10788883	1	48682034	C	0.491	MTND4L	1.094e-07	0.0069	1e-05	1.16806e-07	0.235	0.179043	0.94	0.910405	-0.012	0.77	0.001	-	Intergenic
Heart, Atrial Appendage	rs138553481	1	86437800	T	0.064	MTND4L	5.094e-10	0.017	1e-05	4.48727e-10	0.005	0.000691325	0.01	0.00872665	-0.277	NA	NA	COL24A1	Intronic
LCLs	rs10205130	2	44151572	C	0.426	MTND1	1.233e-10	6.4e-05	1e-05	1.17955e-10	0.005	9.48606e-05	0.02	0.00369487	0.023	5.7e-05	0.015	LRPPRC	Intronic
LCLs	rs7559561	2	44153682	C	0.428	MTCO2	2.712e-07	0.033	1e-05	2.35043e-07	0.085	0.119542	0.89	0.907236	-0.015	0.012	-0.011	LRPPRC	Intronic
Whole Blood	rs10165864	2	55723038	C	0.471	MTRNR2	9.162e-07	0.048	1e-05	9.59031e-07	0.67	0.683405	1	1	-0.015	0.89	0.001	-	Intergenic
Whole Blood	rs10172506	2	55865469	C	0.062	MTND5	4.396e-40	2e-33	1e-05	1.38659e-39	0.005	4.63505e-31	0.005	2.22849e-29	0.058	2e-08	0.037	PNPT1	Intronic
Whole Blood	rs7558127	2	55866605	G	0.064	MTND6	5.263e-32	8.3e-26	1e-05	5.29022e-32	0.005	1.87264e-25	0.005	3.75228e-22	0.07	8.7e-07	0.043	PNPT1	Intronic
LCLs	rs2627775	2	55877113	T	0.458	MTCO1	1.329e-09	0.00041	1e-05	9.94917e-10	0.01	0.00124967	0.035	0.0253912	0.017	0.00063	0.013	PNPT1	Intronic
LCLs	rs62165226	2	55878339	C	0.484	MTCO3	2.791e-08	0.0076	1e-05	2.70918e-08	0.03	0.01932	0.28	0.274804	-0.018	6.8e-06	-0.018	PNPT1	Intronic
Whole Blood	rs375640557	2	55878908	TA	0.342	MTCO3	2.245e-11	2.9e-06	1e-05	2.09349e-11	0.005	0.000121571	0.005	0.00107444	-0.013	0.018	-0.009	PNPT1	Intronic
Subcutaneous Adipose	rs6545512	2	55884031	A	0.052	MTND6	9.00784e-08	0.015	1e-05	7.56836e-08	0.07	0.0570916	0.455	0.443375	0.05	0.17	0.037	PNPT1	Intronic
Whole Blood	rs782633	2	55898203	A	0.481	MTCYB	8.581e-11	1e-05	1e-05	9.22359e-11	0.005	0.000284073	0.005	0.00355601	-0.01	0.071	-0.006	PNPT1	Intronic
Whole Blood	rs76125482	2	170560670	T	0.05	MTND3	2.088e-09	0.0002	1e-05	2.23211e-09	0.005	0.00390735	0.045	0.0606933	-0.028	0.63	0.002	KLHL23	Intronic
Whole Blood	rs58688185	2	218895858	TATGA	0.16	MTND6	7.776e-07	0.042	1e-05	7.00113e-07	0.615	0.597366	1	1	0.028	0.7	0.002	-	Intergenic
Skin (Not sun exposed)	rs10042734	5	54151734	T	0.37	MTND3	1.63085e-08	0.0073	1e-05	1.35748e-08	0.015	0.00707015	0.16	0.11988	-0.016	0.84	0.001	-	Intergenic
Whole Blood	rs6885116	5	167643545	G	0.123	MTND3	7.043e-07	0.038	1e-05	7.88184e-07	0.635	0.585024	1	1	0.015	0.44	-0.005	TENM2	Intronic
Skin (Not sun exposed)	rs35644531	6	9529036	A	0.079	MTCYB	4.41151e-08	0.019	1e-05	3.82849e-08	0.035	0.0183616	0.285	0.274474	-0.019	0.34	0.006	-	Intergenic
Tibial Nerve	rs932345	6	11734862	G	0.35	MTND4L	6.474e-10	0.045	1e-05	5.78192e-10	0.02	0.00433797	0.04	0.0398842	-0.057	NA	NA	ADTRP	Intronic
LCLs	rs140642797	6	93266862	AT	0.251	MTATP6	2.353e-08	0.0065	1e-05	2.03911e-08	0.01	0.0141295	0.225	0.242516	0.017	0.49	-0.003	-	Intergenic
Whole Blood	rs73108116	7	43916009	A	0.072	MTND5	3.294e-08	0.0023	1e-05	3.45537e-08	0.06	0.0494491	0.535	0.541347	0.021	0.81	-0.002	URGCP-MRPS24	3 prime UTR
LCLs	rs35739334	7	45137531	GT	0.287	MTND1	1.011e-09	0.00032	1e-05	1.01699e-09	0.005	0.000703804	0.035	0.0203317	-0.023	0.021	-0.009	-	Intergenic
Whole Blood	rs6973982	7	45143892	G	0.148	MTCO2	7.528e-31	8.6e-25	1e-05	1.11824e-30	0.005	1.02763e-23	0.005	4.05789e-21	-0.028	2.3e-08	-0.023	TBRG4	Intronic
Whole Blood	rs6973982	7	45143892	G	0.148	MTND4	1.098e-21	4.3e-16	1e-05	1.13696e-21	0.005	1.8505e-15	0.005	6.4134e-13	-0.02	0.0026	-0.011	TBRG4	Intronic
Whole Blood	rs6973982	7	45143892	G	0.148	MTATP6	6.062e-14	1.2e-08	1e-05	7.17241e-14	0.005	3.61233e-08	0.005	5.39978e-06	-0.017	0.06	-0.008	TBRG4	Intronic
Whole Blood	rs6973982	7	45143892	G	0.148	MTCO3	1.226e-25	6.4e-20	1e-05	1.04794e-25	0.005	7.64249e-17	0.005	1.8708e-16	-0.028	0.00014	-0.019	TBRG4	Intronic
Whole Blood	rs2304693	7	45148667	A	0.149	MTCYB	3.628e-08	0.0025	1e-05	3.53024e-08	0.05	0.0590924	0.565	0.574462	-0.013	0.92	0<Beta<0.001	TBRG4	Missense
Subcutaneous Adipose	rs2304693	7	45148667	A	0.204	MTCO3	1.11532e-07	0.019	1e-05	1.07014e-07	0.05	0.0750811	0.51	0.515506	-0.019	0.059	-0.018	TBRG4	Missense
Skin (Not sun exposed)	rs2304693	7	45148667	A	0.201	MTCO2	3.11793e-12	2.1e-05	1e-05	2.42859e-12	0.005	3.87331e-06	0.005	5.19577e-05	-0.022	0.0023	-0.023	TBRG4	Missense
Skin (Not sun exposed)	rs2304693	7	45148667	A	0.201	MTCO3	2.83639e-12	2.1e-05	1e-05	2.93034e-12	0.005	1.85568e-06	0.005	4.7697e-05	-0.027	0.0018	-0.026	TBRG4	Missense
Whole Blood	rs2304694	7	45148773	A	0.148	MTND1	2.339e-17	6.1e-12	1e-05	3.18568e-17	0.005	5.82299e-10	0.005	4.77337e-09	0.015	1.6e-08	0.024	TBRG4	Missense
Subcutaneous Adipose	rs2304694	7	45148773	A	0.206	MTND6	6.23609e-10	0.00023	1e-05	5.18046e-10	0.005	0.000987875	0.01	0.00472612	0.031	0.82	-0.005	TBRG4	Missense
Subcutaneous Adipose	rs2304694	7	45148773	A	0.206	MTND5	3.10013e-09	0.0011	1e-05	2.53085e-09	0.005	0.00391761	0.03	0.0220374	0.029	0.82	-0.003	TBRG4	Missense
Subcutaneous Adipose	rs2304694	7	45148773	A	0.206	MTND1	7.46519e-08	0.014	1e-05	6.31863e-08	0.02	0.0326733	0.425	0.386094	0.017	0.0037	0.024	TBRG4	Missense
LCLs	rs2304694	7	45148773	A	0.197	MTCO2	4.147e-18	3.9e-11	1e-05	3.11199e-18	0.005	7.32251e-11	0.005	3.205e-09	-0.03	0.0032	-0.019	TBRG4	Missense
LCLs	rs2304694	7	45148773	A	0.197	MTND4	2.353e-18	3.9e-11	1e-05	2.21605e-18	0.005	3.96603e-11	0.005	2.02046e-09	-0.029	0.00014	-0.019	TBRG4	Missense
LCLs	rs2304694	7	45148773	A	0.197	MTCO3	2.602e-07	0.032	1e-05	2.35507e-07	0.12	0.13686	0.89	0.898665	-0.02	0.27	-0.007	TBRG4	Missense
LCLs	rs2304694	7	45148773	A	0.197	MTRNR2	6.41e-08	0.014	1e-05	6.25804e-08	0.035	0.040798	0.495	0.481664	-0.027	0.0025	-0.029	TBRG4	Missense
LCLs	rs2304694	7	45148773	A	0.197	MTND4L	1.336e-08	0.0037	1e-05	1.27038e-08	0.02	0.0209255	0.125	0.158919	-0.026	0.099	-0.013	TBRG4	Missense
Whole Blood	rs7833624	8	13225280	T	0.17	MTND4L	1.25e-08	0.00092	1e-05	1.25181e-08	0.02	0.0263033	0.275	0.272699	0.016	0.73	0.001	DLC1	Intronic
Whole Blood	rs75488794	8	79501742	G	0.057	MTND6	7.081e-07	0.038	1e-05	7.83253e-07	0.58	0.563424	1	1	0.027	0.15	-0.012	PKIA	Intronic
Putamen basal ganglia	rs75035374	9	27184130	G	0.087	MTCO2	1.283e-09	0.027	1e-05	1.24529e-09	0.005	0.000745569	0.105	0.117754	0.1	NA	NA	TEK	Intronic
LCLs	rs1047991	10	30629226	A	0.284	MTND3	7.517e-08	0.016	1e-05	7.59757e-08	0.03	0.0332436	0.535	0.530185	0.017	0.085	0.01	MTPAP	Missense
Whole Blood	rs66892251	10	30629434	C	0.264	MTRNR2	1.306e-07	0.0082	1e-05	1.42944e-07	0.2	0.161495	0.955	0.943632	-0.015	0.038	-0.009	MTPAP	Intronic
Whole Blood	rs11008009	10	30645320	C	0.456	MTND4	2.167e-07	0.013	1e-05	2.11515e-07	0.285	0.281985	0.99	0.990654	0.008	0.069	0.005	DNM1P17	Intronic
Whole Blood	rs12792550	11	5743243	G	0.129	MTATP6	7.863e-07	0.042	1e-05	8.05035e-07	0.635	0.661827	1	1	0.012	0.95	0<Beta<0.001	TRIM22	Intronic
Whole Blood	rs1692120	11	61417472	A	0.483	MTND1	4.318e-07	0.024	1e-05	4.68044e-07	0.465	0.446422	1	0.999891	-0.006	0.019	0.008	-	Intergenic
LCLs	rs7297229	12	25064599	A	0.426	MTRNR2	2.794e-07	0.033	1e-05	2.83516e-07	0.15	0.136689	0.895	0.913001	-0.021	0.46	-0.005	BCAT1	Intronic
Subcutaneous Adipose	rs12579998	12	27861446	G	0.174	MTND4	2.20303e-12	1.7e-06	1e-05	1.55606e-12	0.005	7.38646e-07	0.005	2.03273e-05	-0.022	0.0004	-0.027	-	Intergenic
Subcutaneous Adipose	rs12579998	12	27861446	G	0.174	MTND1	2.48355e-23	6.5e-17	1e-05	1.0915e-23	0.005	1.16544e-16	0.005	5.51862e-16	-0.032	3.2e-05	-0.032	-	Intergenic
Skin (Not sun exposed)	rs11049103	12	27862081	A	0.179	MTND1	7.7211e-12	2.1e-05	1e-05	6.6793e-12	0.005	6.86414e-06	0.005	0.00011849	-0.022	0.00081	-0.026	-	Intergenic
Subcutaneous Adipose	rs11049112	12	27885971	C	0.174	MTATP6	2.2185e-09	0.00079	1e-05	2.19734e-09	0.005	0.00907287	0.025	0.0160089	-0.018	0.055	-0.014	MRPS35	Intronic
Whole Blood	rs2712498	12	59141399	T	0.433	MTND3	2.154e-07	0.013	1e-05	2.0579e-07	0.265	0.249376	0.99	0.990257	0.011	0.002	0.012	RP11-767I20.1	Intronic
Whole Blood	rs61940184	12	99549682	T	0.133	MTND2	9.236e-07	0.049	2e-05	9.21138e-07	0.67	0.702403	1	1	-0.009	0.67	0.002	ANKS1B	Intronic
Whole Blood	rs589809	13	29041826	A	0.077	MTATP6	6.484e-07	0.035	1e-05	6.68084e-07	0.585	0.588748	1	0.999999	-0.015	0.36	-0.006	FLT1	Intronic
Whole Blood	rs7158706	14	35736692	A	0.165	MTND2	3.281e-07	0.019	1e-05	3.01688e-07	0.385	0.365463	1	0.999064	-0.008	0.19	-0.006	MRPP3	Intronic
Whole Blood	rs61988269	14	35741554	T	0.171	MTRNR1	1.245e-07	0.0078	1e-05	1.31919e-07	0.16	0.163538	0.945	0.936052	0.025	0.43	0.005	MRPP3	Intronic
Whole Blood	rs62014423	15	59893959	G	0.19	MTRNR1	6.929e-07	0.038	1e-05	7.06419e-07	0.585	0.613923	1	1	-0.023	0.86	0.001	GCNT3	Intronic
Whole Blood	rs1372635	15	96237962	T	0.151	MTCYB	7.826e-07	0.042	1e-05	8.44302e-07	0.645	0.629899	1	1	-0.011	0.66	0.002	-	Intergenic
Whole Blood	rs74025341	16	68979418	G	0.109	MTCYB	7.827e-08	0.0052	1e-05	8.07657e-08	0.095	0.114268	0.85	0.828177	0.014	0.79	-0.002	RP11-521L9.1	Intronic
Whole Blood	rs2879224	18	22444558	C	0.168	MTND2	3.81e-07	0.022	1e-05	3.70184e-07	0.43	0.40766	1	0.999687	-0.017	0.11	0.008	RP11-449D8.5	Intronic
Whole Blood	rs11085147	19	5711930	T	0.086	MTCO2	6.749e-07	0.037	1e-05	7.67373e-07	0.62	0.631618	1	0.999999	-0.015	0.019	-0.013	LONP1	Missense
Whole Blood	rs74863981	20	3109875	A	0.099	MTCO1	4.239e-11	5.4e-06	1e-05	5.25473e-11	0.005	0.000228956	0.005	0.00189358	-0.024	6.6e-05	-0.022	UBOX5	Intronic
LCLs	rs78573873	20	12610398	C	0.076	MTRNR1	4.1e-07	0.046	1e-05	4.16065e-07	0.185	0.184451	0.965	0.969255	0.063	0.18	0.023	-	Intergenic
LCLs	rs2837565	21	41672532	C	0.084	MTRNR1	2.091e-07	0.027	1e-05	1.92555e-07	0.105	0.109316	0.85	0.846925	0.065	0.68	0.009	DSCAM	Intronic
