# Supplementary material for: Nuclear genetic regulation of the human mitochondrial transcriptome
Source: eLife journal article supplement (doi:10.7554/elife.41927), 2019-02-18
Supplement: supp [file elife-41927-supp-v1.zip › elife_poa_e41927_Supplementary_File_2.xlsx]

## Sheet: Legend
Supplementary File 2: Details of trans-genome associations when calculating TPM values for mitochondrial-encoded genes using the total number of reads mapping to the mitochondrial genome

## Sheet: File S2
Tissue	Peak Nuclear SNP	MT Gene	P Value (FDR corrected)
Whole Blood	rs7558127	MTND6	8.69457e-26
Whole Blood	rs58688185	MTND6	0.0418107
Whole Blood	rs75488794	MTND6	0.0385534
Whole Blood	rs6973982	MTCO2	8.67579e-25
Whole Blood	rs11085147	MTCO2	0.0368867
Whole Blood	rs782633	MTCYB	1.02645e-05
Whole Blood	rs2304693	MTCYB	0.00249551
Whole Blood	rs1372635	MTCYB	0.0411615
Whole Blood	rs74025341	MTCYB	0.00506448
Whole Blood	rs61940184	MTND2	0.0485034
Whole Blood	rs7158706	MTND2	0.0190407
Whole Blood	rs2879224	MTND2	0.0217326
Whole Blood	rs10172506	MTND5	2.12085e-33
Whole Blood	rs73108116	MTND5	0.00223393
Whole Blood	rs74863981	MTCO1	5.36041e-06
Whole Blood	rs76125482	MTND3	0.000197482
Whole Blood	rs6885116	MTND3	0.0381319
Whole Blood	rs2712498	MTND3	0.0127243
Whole Blood	rs6973982	MTND4	4.421e-16
Whole Blood	rs11008009	MTND4	0.0129312
Whole Blood	rs2304694	MTND1	5.8913e-12
Whole Blood	rs1692120	MTND1	0.0241664
Whole Blood	rs6973982	MTATP6	1.18525e-08
Whole Blood	rs12792550	MTATP6	0.0414032
Whole Blood	rs589809	MTATP6	0.0353475
Whole Blood	rs375640557	MTCO3	2.98267e-06
Whole Blood	rs6973982	MTCO3	6.40253e-20
Whole Blood	rs10165864	MTRNR2	0.0484192
Whole Blood	rs66892251	MTRNR2	0.00817261
Whole Blood	rs61988269	MTRNR1	0.0077792
Whole Blood	rs62014423	MTRNR1	0.0375054
Whole Blood	rs10788883	MTND4L	0.00679466
Whole Blood	rs7833624	MTND4L	0.00091736
Subcutaneous Adipose	rs6545512	MTND6	0.0154482
Subcutaneous Adipose	rs2304694	MTND6	0.00022904
Subcutaneous Adipose	rs2304694	MTND5	0.00109575
Subcutaneous Adipose	rs12579998	MTND4	1.74415e-06
Subcutaneous Adipose	rs2304694	MTND1	0.0141939
Subcutaneous Adipose	rs12579998	MTND1	6.51636e-17
Subcutaneous Adipose	rs11049112	MTATP6	0.000790428
Subcutaneous Adipose	rs2304693	MTCO3	0.0188232
Skin (Not sun exposed)	rs2304693	MTCO2	2.09654e-05
Skin (Not sun exposed)	rs35644531	MTCYB	0.0190732
Skin (Not sun exposed)	rs10042734	MTND3	0.00731418
Skin (Not sun exposed)	rs11049103	MTND1	2.09654e-05
Skin (Not sun exposed)	rs2304693	MTCO3	2.09654e-05
LCLs	rs7559561	MTCO2	0.0329738
LCLs	rs2304694	MTCO2	3.84522e-11
LCLs	rs2627775	MTCO1	0.000411148
LCLs	rs1047991	MTND3	0.0158508
LCLs	rs2304694	MTND4	3.84522e-11
LCLs	rs10205130	MTND1	6.37774e-05
LCLs	rs35739334	MTND1	0.00031894
LCLs	rs140642797	MTATP6	0.00647269
LCLs	rs62165226	MTCO3	0.00757411
LCLs	rs2304694	MTCO3	0.0324643
LCLs	rs2304694	MTRNR2	0.0140935
LCLs	rs7297229	MTRNR2	0.0333531
LCLs	rs78573873	MTRNR1	0.0462536
LCLs	rs2837565	MTRNR1	0.0274403
LCLs	rs2304694	MTND4L	0.00373474
Putamen basal ganglia	rs75035374	MTCO2	0.0914554
Heart, Atrial Appendage	rs11811165	MTND4L	0.044925
Tibial Nerve	rs932345	MTND4L	0.0274512
