# Supplementary material for: Nuclear genetic regulation of the human mitochondrial transcriptome
Source: eLife journal article supplement (doi:10.7554/elife.41927), 2019-02-18
Supplement: supp [file elife-41927-supp-v1.zip › elife_poa_e41927_Supplementary_File_3.xlsx]

## Sheet: Legend
Supplementary File 3: Replication P-values and Beta Coefficients for mito trans-genome eQTLs in all tissue types

## Sheet: Pvalues
		Adipose Visceral Omentum	Adrenal Gland	Artery Aorta	Coronary Artery	Tibial Artery	Anterior cingulate cortex BA24 (Brain)	Caudate basal ganglia (Brain)	Cerebellar Hemisphere (Brain)	Cerebellum (Brain)	Cortex (Brain)	Frontal Cortex BA9 (Brain)	Hippocampus (Brain)	Hypothalamus (Brain)	Nucleus accumbens basal ganglia (Brain)	Putamen basal ganglia (Brain)	Breast Mammary Tissue	Sigmoid Colon	Transverse Colon	Gastro esophageal Junction	Esophagus Mucosa	Esophagus Muscularis	Heart Atrial Appendage	Heart Left Ventricle	Lung	Skeletal Muscle	Tibial Nerve	Pancreas	Transformed fibroblasts	Sun Exposed Skin	Stomach	Testis	Thyroid	Whole blood	LCL	Subcutaneous Adipose	Non-Sun Exposed Skin
blood_MTND6-rs7558127		0.007292	0.05301	4.698e-05	0.001455	0.007906	0.409	0.1129	0.6804	0.5926	0.8307	0.5394	0.8078	0.1425	0.5344	0.7617	4.423e-05	0.007184	0.1078	0.0004603	0.02408	0.08921	0.1845	0.002651	0.003859	1.083e-06	0.1135	3.699e-05	0.0109	0.01616	0.2145	0.03675	0.002286	5.263e-32	0.6823	9.00784e-08	0.0235963
blood_MTND6-rs58688185		0.8547	0.8397	0.4493	0.7177	0.9787	0.2134	0.677	0.8391	0.1422	0.5507	0.5202	0.1972	0.08857	0.02421	0.6804	0.7647	0.1606	0.5325	0.02139	0.2776	0.9883	0.2796	0.4589	0.1294	0.4942	0.8885	0.3888	0.6652	0.5121	0.1784	0.4103	0.9455	7.776e-07	0.52	0.136215	0.369345
blood_MTND6-rs75488794		0.05045	0.4998	0.1863	0.5825	0.7278	0.7262	0.7329	0.1021	0.7559	0.7309	0.766	0.4286	0.6632	0.5782	0.6063	0.5321	0.8958	0.8978	0.7874	0.4388	0.3949	0.4516	0.4315	0.7635	0.3358	0.2474	0.1128	0.3386	0.1269	0.2058	0.697	0.1166	7.081e-07	0.5404	0.886029	0.326038
blood_MTCO2-rs6973982		0.3525	0.435	0.002503	0.09594	0.008482	0.02167	0.001605	0.2055	0.4131	0.08451	0.0005032	0.2266	0.07423	0.2686	0.008207	0.03357	2.1e-05	0.5879	0.129	0.1338	0.006155	0.01304	0.01363	0.001569	0.004718	0.09651	0.9809	0.01243	0.121	0.5916	0.2408	0.01686	7.528e-31	4.147e-18	0.00175552	3.11793e-12
blood_MTCO2-rs11085147		0.003017	0.07157	0.4899	0.457	0.2478	0.5784	0.8812	0.3521	0.5835	0.958	0.1289	0.5195	0.8568	0.147	0.3416	0.3547	0.0248	0.06439	0.9774	0.002147	0.4471	0.8514	0.4544	0.4093	0.2323	0.1809	0.3257	0.609	0.04457	0.891	0.1061	0.9825	6.749e-07	0.1086	0.832142	5.16875e-05
blood_MTCYB-rs782633		0.8732	0.3391	0.1414	0.8439	0.2784	0.3048	0.4446	0.4899	0.4931	0.4997	0.7493	0.496	0.02436	0.3753	0.5875	0.9244	0.5244	0.6954	0.7852	0.3075	0.6228	0.3869	0.2746	0.6923	0.03115	0.07049	0.5142	0.1443	0.9786	0.7343	0.7801	0.7691	8.581e-11	0.3027	0.182305	0.000667528
blood_MTCYB-rs2304693		0.04192	0.6674	0.08149	0.1007	0.6683	0.5761	0.1282	0.599	0.05933	0.6516	0.3362	0.2886	0.3036	0.4152	0.1536	0.4599	0.3783	0.5945	0.489	0.3552	0.06736	0.2087	0.467	0.7262	0.149	0.8635	0.08044	0.9878	0.1253	0.6419	0.5616	0.4484	3.628e-08	0.009604	0.00100826	0.911678
blood_MTCYB-rs1372635		0.9213	0.4862	0.8693	0.4282	0.9093	0.7217	0.314	0.9572	0.5593	0.2498	0.1401	0.5056	0.4763	0.1414	0.5401	0.6258	0.2902	0.8072	0.325	0.03145	0.2447	0.1344	0.6676	0.5065	0.3901	0.2235	0.4626	0.05854	0.1074	0.4702	0.9946	0.8612	7.826e-07	0.4572	0.351465	0.964077
blood_MTCYB-rs74025341		0.6109	0.01332	0.02686	0.6485	0.9515	0.2387	0.2941	0.1084	0.5475	0.1533	0.623	0.05379	0.8238	0.5516	0.7774	0.04867	0.1157	0.08505	0.9622	0.9272	0.1526	0.2231	0.07686	0.3073	0.6241	0.937	0.3763	0.989	0.2927	0.336	0.9254	0.7902	7.827e-08	0.3758	0.0637792	0.860467
blood_MTND2-rs61940184		0.7614	0.52	0.3411	0.98	0.1709	0.9131	0.3215	0.2938	0.05942	0.6112	0.6157	0.7123	0.1236	0.8665	0.06594	0.8914	0.3758	0.5122	0.4592	0.4017	0.4804	0.7864	0.03168	0.4982	0.1602	0.5847	0.8497	0.4553	0.03496	0.7855	0.6966	0.07393	9.236e-07	0.1612	0.831594	0.820214
blood_MTND2-rs7158706		0.6631	0.9916	0.9397	0.784	0.8312	0.867	0.8088	0.7955	0.4888	0.6334	0.9732	0.2737	0.1211	0.1005	0.009094	0.4153	0.3286	0.588	0.1403	0.7515	0.5708	0.4692	0.466	0.672	0.9699	0.5124	0.354	0.5305	0.4777	0.08489	0.7352	0.825	3.281e-07	0.4353	0.75703	0.528775
blood_MTND2-rs2879224		0.6455	0.2083	0.0931	0.3877	0.8469	0.9305	0.2799	0.8938	0.2271	0.6083	0.621	0.421	0.7658	0.4863	0.1049	0.6044	0.8482	0.8504	0.4764	0.07736	0.4725	0.4022	0.4506	0.6125	0.7603	0.465	0.7875	0.4673	0.3211	0.4992	0.3426	0.4	3.81e-07	0.4722	0.660826	0.784199
blood_MTND5-rs10172506		0.01884	0.07274	7.712e-05	0.01153	0.03184	0.1562	0.008314	0.2293	0.1863	0.6716	0.3077	0.2968	0.06646	0.1155	0.477	0.0002302	0.006641	0.194	0.0007182	0.05717	0.3916	0.628	0.001987	0.01383	1.381e-08	0.212	0.0001481	0.1582	0.002718	0.6993	0.01727	0.002302	4.396e-40	0.1169	5.11976e-05	0.398381
blood_MTND5-rs73108116		0.06164	0.01111	0.2731	0.9696	0.7924	0.04194	0.4564	0.5033	0.05222	0.04505	0.826	0.2776	0.01272	0.03834	0.5635	0.8478	0.04291	0.9047	0.1185	0.02673	0.8884	0.6814	0.7243	0.1778	0.5583	0.04035	0.4363	0.4428	0.01144	0.7096	0.1573	0.01645	3.294e-08	0.1064	0.473009	0.0222105
blood_MTCO1-rs74863981		0.765	0.9	0.126	0.3794	0.8784	0.8216	0.4808	0.3615	0.5873	0.8851	0.6226	0.3629	0.786	0.9321	0.8457	0.5493	0.424	0.567	0.135	0.7257	0.506	0.3403	0.7886	0.5825	0.6307	0.1983	0.0205	0.2815	0.5508	0.4352	0.8469	0.4807	4.239e-11	NA	NA	NA
blood_MTND3-rs76125482		0.5409	0.6437	0.8453	0.5872	0.3373	0.7877	0.1736	0.3754	0.2706	0.3059	0.3173	0.01488	0.2618	0.4144	0.08043	0.6978	0.006457	0.6492	0.6745	0.1985	0.2245	0.4393	0.00884	0.3433	0.002329	0.4577	0.2288	0.3143	0.5375	0.02355	0.2223	0.9387	2.088e-09	1.699e-06	4.08645e-05	0.947968
blood_MTND3-rs6885116		0.6715	0.261	0.1072	0.8103	0.02727	0.6894	0.04611	0.8088	0.567	0.2408	0.6188	0.8193	0.2947	0.5736	0.4607	0.3537	0.03594	0.9551	0.06511	0.2437	0.1148	0.7712	0.406	0.005454	0.0613	0.0433	0.8061	0.07147	0.08146	0.1161	0.7087	0.8812	7.043e-07	0.1845	0.289671	0.296153
blood_MTND3-rs2712498		0.2984	0.2437	0.8396	0.2981	0.1649	0.9381	0.1294	0.5053	0.5903	0.2447	0.9755	0.4221	0.4424	0.1586	0.9277	0.3776	0.1755	0.8947	0.3134	0.6066	0.3406	0.1455	0.1117	0.2058	0.1437	0.8111	0.2078	0.5405	0.7985	0.004644	0.5969	0.8877	2.154e-07	0.1133	0.0856894	0.14937
blood_MTND4-rs6973982		0.006414	0.4057	0.6557	0.2824	0.7963	0.6045	0.01381	0.03153	0.6218	0.5429	0.4371	0.2304	0.1622	0.2386	0.07499	0.04425	0.0009411	0.08386	0.2992	0.04171	0.02304	0.02418	0.7005	0.003191	0.3554	0.9203	0.3028	1.78e-05	0.4084	0.7849	0.2298	0.08527	1.098e-21	2.353e-18	0.053582	0.0200192
blood_MTND4-rs11008009		0.7509	0.4091	0.2894	0.7891	0.267	0.1052	0.3027	0.7544	0.7196	0.3628	0.105	0.3414	0.4266	0.06563	0.324	0.7581	0.8753	0.5325	0.4051	0.2273	0.4618	0.2905	0.6824	0.6792	0.4709	0.9126	0.8669	0.5376	0.02449	0.8781	0.7109	0.626	2.167e-07	0.01837	4.70619e-05	0.227981
blood_MTND1-rs2304694		0.4459	0.05562	0.2404	0.7394	0.002311	0.3052	0.2934	0.0585	0.06689	0.5904	0.317	0.3071	0.1006	0.0008524	0.1364	0.001169	0.1201	0.3217	0.8481	0.000239	0.1103	0.2527	0.279	0.08889	0.02562	1.152e-06	0.09204	0.05448	0.01144	0.4217	0.002246	0.8698	2.339e-17	4.752e-05	7.46519e-08	0.000651517
blood_MTND1-rs1692120		0.8003	0.1379	0.715	0.5696	0.949	0.1986	0.176	0.7237	0.2252	0.9703	0.6978	0.8647	0.7136	0.7554	0.2333	0.004031	0.7793	0.7212	0.05474	0.6844	0.3679	0.02609	0.2933	0.4029	0.08721	0.942	0.5031	0.4151	0.8749	0.5864	0.8292	0.663	4.318e-07	0.8527	0.923884	0.44915
blood_MTATP6-rs6973982		0.0838	0.6372	0.0616	0.1161	0.07009	0.07021	0.01543	0.3469	0.214	0.02669	0.001797	0.1103	0.1321	0.3075	0.01695	0.002842	0.001312	0.2578	0.6109	0.007695	0.02502	0.06221	0.5414	0.001679	0.1401	0.2059	0.9234	0.008711	0.1099	0.4788	0.8872	0.07109	6.062e-14	0.005213	0.147331	1.35624e-05
blood_MTATP6-rs12792550		0.4705	0.2511	0.2731	0.5902	0.1206	0.8713	0.4015	0.899	0.796	0.123	0.8524	0.648	0.9757	0.8303	0.5551	0.4347	0.4112	0.1216	0.3072	0.6773	0.7783	0.6062	0.06661	0.09181	0.6097	0.1325	0.7554	0.8503	0.9194	0.4227	0.9912	0.7603	7.863e-07	0.173	0.689929	0.134979
blood_MTATP6-rs589809		0.3154	0.7191	0.423	0.9171	0.9383	0.7284	0.1989	0.8243	0.6682	0.04838	0.9719	0.2424	0.7105	0.4717	0.3972	0.1271	0.4717	0.135	0.6531	0.6494	0.8076	0.4095	0.6252	0.1674	0.7812	0.4136	0.1008	0.2358	0.2217	0.451	0.5241	0.5937	6.484e-07	0.8396	0.67704	0.763921
blood_MTCO3-rs375640557		0.002235	0.403	0.8057	0.8409	0.5304	0.3999	0.06935	0.4733	0.1044	0.05202	0.1381	0.292	0.2958	0.7936	0.2058	0.09349	0.03182	0.4471	0.2348	0.3913	0.586	0.833	0.2409	0.03585	0.03692	0.001494	0.7462	0.2077	0.5774	0.2455	0.1663	0.8094	2.245e-11	0.001376	0.00523535	0.0690904
blood_MTCO3-rs6973982		0.04907	0.4056	0.001042	0.01408	2.422e-05	0.4293	0.003253	0.204	0.5554	0.1254	0.03001	0.04916	0.9121	0.2468	0.003421	0.2447	0.02251	0.2207	0.5451	0.03495	0.01864	0.01649	0.4411	0.05989	0.01625	0.249	0.7364	0.02301	0.1001	0.8547	0.4936	0.06549	1.226e-25	2.602e-07	1.11532e-07	2.83639e-12
blood_MTRNR2-rs10165864		0.8693	0.2201	0.2781	0.887	0.435	0.1094	0.2305	0.3207	0.5861	0.008755	0.0245	0.3244	0.6936	0.524	0.3252	0.5176	0.9208	0.8709	0.03615	0.8015	0.9393	0.6533	0.8709	0.8055	0.2932	0.2881	0.8101	0.09986	0.3247	0.3732	0.2036	0.8794	9.162e-07	0.5273	0.625436	0.70948
blood_MTRNR2-rs66892251		0.08782	0.7896	0.8379	0.249	0.07137	0.2452	0.3944	0.2832	0.2095	0.6209	0.6096	0.1478	0.4289	0.4369	0.9962	0.06579	0.2756	0.6791	0.8287	0.7747	0.5281	0.5688	0.3041	0.1788	0.03646	0.01258	0.00618	0.004315	0.1624	0.6882	0.5411	0.07176	1.306e-07	0.0007353	1.54068e-06	5.45319e-05
blood_MTRNR1-rs61988269		0.3496	0.8307	0.6147	0.09799	0.5991	0.7749	0.763	0.9607	0.3454	0.7118	0.8273	0.2543	0.6337	0.5219	0.4937	0.7063	0.8646	0.728	0.9958	0.7039	0.6602	0.5265	0.189	0.6647	0.3596	0.2921	0.5705	0.08476	0.08741	0.1956	0.4733	0.6434	1.245e-07	0.8255	0.511057	0.478684
blood_MTRNR1-rs62014423		0.5967	0.416	0.8355	0.3085	0.1948	0.4992	0.223	0.6817	0.6269	0.889	0.535	0.05508	0.841	0.4623	0.5796	0.7295	0.05833	0.7881	0.4348	0.3627	0.3444	0.7608	0.7665	0.7114	0.9574	0.2892	0.2032	0.9346	0.1082	0.05183	0.2595	0.5997	6.929e-07	NA	NA	NA
blood_MTND4L-rs10788883		0.2907	0.1427	0.1287	0.1723	0.9703	0.1583	0.1135	0.1864	0.2084	0.7773	0.758	0.7885	0.108	0.1923	0.3713	0.5782	0.3742	0.7034	0.666	0.6543	0.6167	0.3356	0.8596	0.4086	0.2147	0.3284	0.5782	0.5831	0.5741	0.2163	0.2573	0.6074	1.094e-07	0.2819	0.786123	0.130967
blood_MTND4L-rs7833624		0.7158	0.9251	0.6555	0.3355	0.7387	0.4537	0.0859	0.09052	0.009614	0.4868	0.8322	0.02901	0.0131	0.6892	0.6421	0.2303	0.05598	0.9356	0.09942	0.6413	0.8132	0.6178	0.2803	0.7818	0.4227	0.4806	0.575	0.7154	0.2007	0.8834	0.7291	0.1044	1.25e-08	0.945	0.610804	0.223173
Fat_MTND6-rs6545512		0.002994	0.03332	0.002624	0.003154	0.01633	0.774	0.05071	0.7366	0.4566	0.6083	0.8265	0.5637	0.2783	0.3543	0.5943	0.0002971	0.00268	0.1328	0.000895	0.03612	0.2106	0.1497	0.007645	0.008895	3.487e-06	0.2355	1.224e-05	0.007936	0.01613	0.3025	0.05	0.03099	2.374e-26	0.6823	9.00784e-08	0.0235963
Fat_MTND6-rs2304694		0.6205	0.0601	0.2246	0.2372	0.4935	0.8511	0.1556	0.7776	0.9666	0.2043	0.4877	0.5268	0.72	0.204	0.5021	0.1005	0.9339	0.9477	0.7291	0.001723	0.2733	0.6469	0.005911	0.03422	0.3359	0.1434	0.09859	0.01466	0.06656	0.392	0.793	0.8164	7.898e-05	0.4992	6.23609e-10	0.0936914
Fat_MTND5-rs2304694		0.8388	0.2776	0.2515	0.2107	0.8206	0.8917	0.3049	0.922	0.1685	0.1606	0.8425	0.4075	0.5561	0.25	0.885	0.2003	0.8589	0.7409	0.6419	0.01284	0.1735	0.4041	0.002488	0.09198	0.7103	0.2109	0.0462	0.006962	0.05601	0.4209	0.6618	0.9508	2.965e-05	0.1248	3.10013e-09	0.00787931
Fat_MTND4-rs12579998		0.8347	0.791	0.6315	0.03033	0.7262	0.8684	0.9535	0.1504	0.006179	0.4762	0.777	0.1897	0.7325	0.8766	0.6845	0.2815	0.6927	0.9139	0.9967	0.8865	0.7112	0.3288	0.005391	0.8888	0.01026	0.902	0.2146	0.2437	0.1675	0.8303	0.3355	0.5691	0.306	0.1003	2.20303e-12	0.0168452
Fat_MTND1-rs2304694		0.4459	0.05562	0.2404	0.7394	0.002311	0.3052	0.2934	0.0585	0.06689	0.5904	0.317	0.3071	0.1006	0.0008524	0.1364	0.001169	0.1201	0.3217	0.8481	0.000239	0.1103	0.2527	0.279	0.08889	0.02562	1.152e-06	0.09204	0.05448	0.01144	0.4217	0.002246	0.8698	2.339e-17	4.752e-05	7.46519e-08	0.000651517
Fat_MTND1-rs12579998		0.0001525	0.8832	0.00579	0.6388	0.001547	0.2831	0.1909	0.1286	0.02071	0.1427	0.7879	0.08205	0.5223	0.0424	0.7776	0.06168	0.6397	0.3313	0.4829	0.004232	0.9708	0.4801	0.0005877	0.2987	0.01644	0.001254	0.006184	0.004602	0.0002639	0.3267	0.1124	0.7004	0.008191	0.0001114	2.48355e-23	2.03226e-11
Fat_MTATP6-rs11049112		0.1772	0.4078	0.6453	0.5626	0.2318	0.8534	0.5526	0.06884	0.07246	0.05944	0.5904	0.1902	0.02752	0.2201	0.6749	0.7921	0.998	0.885	0.6309	0.7962	0.8246	0.8	0.5616	0.2171	0.05812	0.7585	0.4931	0.9551	0.4697	0.7068	0.4047	0.7406	0.3945	0.000108	2.2185e-09	0.0318912
Fat_MTCO3-rs2304693		0.04907	0.4056	0.001042	0.01408	5.282e-05	0.5204	0.004093	0.2593	0.5554	0.1254	0.01871	0.0337	0.8595	0.2723	0.002038	0.2447	0.02251	0.2207	0.5451	0.05432	0.01817	0.01649	0.5383	0.06101	0.02553	0.3302	0.7364	0.01675	0.1139	0.8547	0.3122	0.06729	1.608e-23	2.602e-07	1.11532e-07	2.83639e-12
Skin_MTCO2-rs2304693		0.3525	0.435	0.002503	0.09594	0.01436	0.03035	0.003183	0.2542	0.4131	0.08451	0.0002091	0.1433	0.1052	0.3007	0.008056	0.03357	2.1e-05	0.5879	0.129	0.1801	0.00553	0.01304	0.02339	0.002488	0.008474	0.149	0.9809	0.01104	0.1766	0.5916	0.3957	0.0205	4.35e-28	4.147e-18	0.00175552	3.11793e-12
Skin_MTCYB-rs35644531		0.0404	0.1985	0.1213	0.5572	0.9091	0.06106	0.7209	0.5244	0.953	0.7426	0.07503	0.006078	0.3001	0.3986	0.7766	0.21	0.3229	0.7607	0.05404	0.5985	0.4928	0.8046	0.1752	0.2561	0.0843	0.2867	0.3922	0.07341	0.6932	0.6716	0.4543	0.6089	0.1758	0.2628	0.445972	4.41151e-08
Skin_MTND3-rs10042734		0.766	0.3926	0.9922	0.09978	0.969	0.3507	0.4592	0.2698	0.354	0.5897	0.6564	0.1092	0.5373	0.1301	0.361	0.4761	0.4493	0.206	0.9155	0.5098	0.04523	0.6426	0.5966	0.8458	0.5836	0.01338	0.4182	0.9703	0.872	0.7107	0.2813	0.3438	0.1167	0.03637	3.83468e-06	1.63085e-08
Skin_MTND1-rs11049103		5.676e-05	0.975	0.005262	0.383	0.0001299	0.2048	0.226	0.1468	0.01332	0.05977	0.9642	0.1086	0.8366	0.04174	0.7194	0.05054	0.6247	0.2483	0.6584	0.0022	0.8972	0.2932	0.00285	0.3575	0.01726	0.002934	0.07728	0.002798	0.0001782	0.2894	0.03168	0.3436	0.0001808	0.000234	1.74577e-23	7.7211e-12
Skin_MTCO3-rs2304693		0.04907	0.4056	0.001042	0.01408	5.282e-05	0.5204	0.004093	0.2593	0.5554	0.1254	0.01871	0.0337	0.8595	0.2723	0.002038	0.2447	0.02251	0.2207	0.5451	0.05432	0.01817	0.01649	0.5383	0.06101	0.02553	0.3302	0.7364	0.01675	0.1139	0.8547	0.3122	0.06729	1.608e-23	2.602e-07	1.11532e-07	2.83639e-12
lcl_MTCO2-rs7559561		0.6487	0.6456	0.8504	0.832	0.2713	0.1362	0.9592	0.4116	0.3759	0.7373	0.9601	0.02313	0.1584	0.3935	0.6389	0.811	0.3524	0.7524	0.2841	0.06811	0.7742	0.08337	0.2382	0.01421	0.4403	0.02894	0.1612	0.0557	0.2478	0.6436	0.06837	0.8149	0.003226	2.712e-07	0.326318	0.347244
lcl_MTCO2-rs2304694		0.3525	0.435	0.002503	0.09594	0.01436	0.03035	0.003183	0.2542	0.4131	0.08451	0.0002091	0.1433	0.1052	0.3007	0.008056	0.03357	2.1e-05	0.5879	0.129	0.1801	0.00553	0.01304	0.02339	0.002488	0.008474	0.149	0.9809	0.01104	0.1766	0.5916	0.3957	0.0205	1.878e-30	4.147e-18	0.00305367	1.23201e-11
lcl_MTCO1-rs2627775		0.9309	0.9399	0.5618	0.7923	0.6013	0.6909	0.1925	0.3718	0.8053	0.4315	0.2507	0.2006	0.116	0.5902	0.3002	0.5457	0.9184	0.9633	0.9107	0.9946	0.6379	0.7705	0.2532	0.04675	0.6912	0.5491	0.5223	0.68	0.964	0.35	0.01428	0.1967	0.07669	1.329e-09	0.140098	0.134534
lcl_MTND3-rs1047991		0.5899	0.3094	0.005294	0.3078	0.4739	0.6911	0.854	0.766	0.466	0.6744	0.8965	0.3052	0.1163	0.7281	0.2454	0.522	0.9121	0.7332	0.4063	0.1281	0.9147	0.9576	0.7422	0.2938	0.9903	0.7337	0.6555	0.2999	0.06751	0.9011	0.9082	0.07192	0.03822	7.517e-08	0.496623	0.121466
lcl_MTND4-rs2304694		0.006414	0.4057	0.6557	0.2824	0.8488	0.5066	0.02744	0.02261	0.6218	0.5429	0.3555	0.2564	0.1773	0.3288	0.1064	0.04425	0.0009411	0.08386	0.2992	0.04367	0.01916	0.02418	0.8839	0.003074	0.3989	0.8603	0.3028	7.941e-06	0.4298	0.7849	0.3039	0.09125	1.592e-21	2.353e-18	0.027853	0.019476
lcl_MTND1-rs10205130		0.03161	0.0008732	0.003737	0.001526	0.0009382	0.3278	0.8248	0.328	0.02938	0.01317	0.9498	0.005491	0.1845	0.6717	0.2404	0.3825	0.1348	0.1216	0.3719	0.0006922	0.5388	0.1863	0.8111	0.009815	0.3392	0.0129	0.07878	8.074e-05	0.1621	0.1262	0.004494	0.2003	8.301e-05	1.233e-10	0.03635	0.0229322
lcl_MTND1-rs35739334		0.6163	0.7563	0.9689	0.2038	0.355	0.7794	0.1737	0.4115	0.5279	0.9326	0.8686	0.4781	0.9964	0.7684	0.4144	0.04976	0.03884	0.5733	0.9173	0.04359	0.8648	0.9197	0.1664	0.7286	0.8427	0.1117	0.03583	0.002066	0.2681	0.8428	0.2397	0.4863	8.165e-07	1.011e-09	4.71896e-05	0.00641444
lcl_MTATP6-rs140642797		0.9872	0.8847	0.7325	0.8612	0.1186	0.5639	0.7053	0.06968	0.9651	0.4987	0.1963	0.219	0.2698	0.3181	0.6433	0.7892	0.6706	0.1301	0.5522	0.3699	0.4527	0.5911	0.3129	0.9796	0.4121	0.1349	0.5181	0.9761	0.2834	0.6083	0.4017	0.01359	0.4836	2.353e-08	0.0621985	0.627581
lcl_MTCO3-rs62165226		0.02621	0.7345	0.414	0.1627	0.3258	0.6251	0.22	0.8553	0.2479	0.1132	0.3275	0.611	0.3929	0.2668	0.6114	0.09362	0.1366	0.3843	0.2493	0.2604	0.8976	0.2408	0.3319	0.2377	0.1443	0.001098	0.935	0.1122	0.1485	0.3971	0.2631	0.9056	8.603e-08	2.791e-08	0.0141812	0.0568696
lcl_MTCO3-rs2304694		0.04907	0.4056	0.001042	0.01408	5.282e-05	0.5204	0.004093	0.2593	0.5554	0.1254	0.01871	0.0337	0.8595	0.2723	0.002038	0.2447	0.02251	0.2207	0.5451	0.05432	0.01817	0.01649	0.5383	0.06101	0.02553	0.3302	0.7364	0.01675	0.1139	0.8547	0.3122	0.06729	2.034e-25	2.602e-07	1.30341e-07	2.70986e-11
lcl_MTRNR2-rs2304694		0.05331	0.2817	0.09571	0.1462	0.355	0.8877	0.6294	0.4385	0.2648	0.02936	0.4977	0.956	0.4301	0.5096	0.6823	0.6943	0.1807	0.04002	0.4116	0.9426	0.08143	0.6922	0.194	0.5727	0.8595	0.5854	0.08047	0.04075	0.4003	0.2873	0.01564	0.5585	0.6964	6.41e-08	0.0623366	0.388983
lcl_MTRNR2-rs7297229		0.2901	0.1733	0.03424	0.4569	0.5168	0.4007	0.5387	0.9985	0.7811	0.9324	0.05076	0.5325	0.1897	0.612	0.9072	0.9789	0.4099	0.9213	0.7878	0.3079	0.4406	0.09143	0.256	0.207	0.1052	0.7714	0.8714	0.8728	0.5453	0.869	0.9137	0.3366	0.933	2.794e-07	0.0146754	0.19028
lcl_MTRNR1-rs78573873		0.4127	0.8729	0.314	0.1594	0.5707	0.7976	0.5252	0.5887	0.9073	0.768	0.4475	0.983	0.359	0.7462	0.7366	0.803	0.09183	0.6185	0.3579	0.9001	0.8796	0.69	0.2627	0.6577	0.5111	0.9946	0.6952	0.3146	0.6702	0.1523	0.007234	0.4489	0.0939	4.1e-07	0.871743	0.824104
lcl_MTRNR1-rs2837565		0.5159	0.3166	0.3548	0.1416	0.8777	0.08543	0.8081	0.3608	0.7905	0.9574	0.7062	0.02178	0.8333	0.7517	0.192	0.395	0.1517	0.9278	0.5092	0.8361	0.9018	0.5463	0.2547	0.6168	0.1057	0.4189	0.7326	0.2569	0.0499	0.587	0.1909	0.2222	0.137	2.091e-07	0.238793	0.851588
lcl_MTND4L-rs2304694		0.6304	0.4131	0.6103	0.5553	0.733	0.1105	0.6701	0.6583	0.803	0.4967	0.5148	0.6133	0.631	0.568	0.7689	0.08398	0.07356	0.09655	0.9571	0.1647	0.05028	0.1255	0.8271	0.07039	0.02913	0.3511	0.3974	0.00922	0.9926	0.8783	0.9691	0.1242	0.0001255	1.336e-08	0.0410039	0.948223
BrainPutamenbasalganglia_MTCO2-rs75035374		0.7029	0.5518	0.3057	0.9036	0.4514	0.5213	0.0003924	0.003313	0.03431	0.1661	0.01221	0.001217	0.1606	3.837e-05	1.283e-09	0.4138	0.3154	0.6239	0.109	0.5555	0.2328	0.2977	0.4164	0.422	0.7648	0.5783	0.8814	0.7813	0.8989	0.1139	0.6461	0.4217	0.3443	NA	NA	NA
HeartAtrialAppendage_MTND4L-rs138553481		0.01636	0.2431	0.8587	0.5152	0.8863	NA	NA	NA	NA	NA	NA	NA	NA	NA	NA	0.03253	0.4651	0.7075	0.8216	0.8386	0.9196	5.094e-10	0.0239	0.1919	0.1652	0.03835	0.6821	0.9271	NA	0.6362	0.2751	NA	NA	NA	NA	NA
NerveTibial_MTND4L-rs932345		0.7919	0.676	0.3452	0.02975	0.445	0.8423	0.2463	0.983	0.3184	0.2536	0.9523	0.2489	0.5523	0.7955	0.2999	0.1652	0.7954	0.5342	0.962	0.261	0.8205	0.5244	0.8943	0.4203	0.75	6.474e-10	0.1783	0.1161	0.6394	0.15	0.8423	0.6667	0.2624	0.3098	0.72483	0.0592484

## Sheet: Betas
		Adipose Visceral Omentum	Adrenal Gland	Artery Aorta	Coronary Artery	Tibial Artery	Anterior cingulate cortex BA24 (Brain)	Caudate basal ganglia (Brain)	Cerebellar Hemisphere (Brain)	Cerebellum (Brain)	Cortex (Brain)	Frontal Cortex BA9 (Brain)	Hippocampus (Brain)	Hypothalamus (Brain)	Nucleus accumbens basal ganglia (Brain)	Putamen basal ganglia (Brain)	Breast Mammary Tissue	Sigmoid Colon	Transverse Colon	Gastro esophageal Junction	Esophagus Mucosa	Esophagus Muscularis	Heart Atrial Appendage	Heart Left Ventricle	Lung	Skeletal Muscle	Tibial Nerve	Pancreas	Transformed fibroblasts	Sun Exposed Skin	Stomach	Testis	Thyroid	Whole blood	LCL	Subcutaneous Adipose	Non-Sun Exposed Skin
blood_MTND6-rs7558127		0.09297	0.08099	0.1469	0.1524	0.0916	0.04888	0.04462	0.01356	0.01778	0.01059	0.03559	-0.01048	0.08135	0.01924	0.01165	0.1492	0.1242	0.08178	0.1313	0.06486	0.07526	0.05925	0.1144	0.1131	0.1487	0.04346	0.1552	0.03875	0.05261	0.06025	0.04847	0.1101	0.0703	-0.0027	0.0499211	0.0120613
blood_MTND6-rs58688185		-0.005018	-0.006057	0.01688	0.01457	-0.0006579	-0.05079	-0.008944	-0.004381	-0.02941	0.02033	-0.02272	-0.03724	-0.05942	-0.04709	-0.009479	-0.009062	0.04865	0.02338	-0.07252	-0.02115	-0.0004406	-0.03279	-0.01827	0.04245	0.01762	0.002575	-0.02386	-0.005058	-0.01161	-0.05413	-0.01488	-0.001821	0.0279	0.0028	0.00894771	0.00322671
blood_MTND6-rs75488794		0.07339	0.03245	0.03998	-0.02675	0.01242	-0.01712	0.009721	0.04015	0.00745	0.01442	0.013	0.02903	0.01772	0.01497	0.01439	0.0228	-0.005539	0.006951	-0.009936	0.02093	-0.0359	0.03214	-0.0322	0.01137	0.03093	-0.03082	0.07228	-0.01604	-0.03488	0.06128	-0.009976	0.05959	0.0267	-0.0034	0.00130776	0.00492516
blood_MTCO2-rs6973982		-0.01342	-0.007997	-0.02798	-0.02578	-0.02261	-0.02843	-0.04343	-0.01589	-0.01062	-0.02072	-0.04532	-0.01554	-0.02358	-0.01315	-0.03973	-0.02538	-0.05102	-0.02076	-0.01623	-0.01498	-0.09124	-0.08809	-0.027	-0.03022	-0.02694	-0.01394	-0.0002118	-0.02466	-0.01094	0.02133	-0.009821	-0.06057	-0.0279	-0.0304	-0.00954482	-0.0216553
blood_MTCO2-rs11085147		-0.05663	0.0247	-0.008055	-0.0159	-0.01345	0.009355	-0.0025	-0.01415	-0.007561	0.0007005	-0.02388	-0.01068	-0.002797	-0.021	-0.01637	-0.01495	-0.03492	0.08584	-0.0003761	-0.04448	0.03161	0.008245	-0.009677	-0.01021	-0.01465	-0.01469	-0.01434	0.007162	-0.01818	-0.007172	-0.01753	0.0007672	-0.0153	-0.008	-0.000851304	-0.0170188
blood_MTCYB-rs782633		0.001303	0.006568	-0.01054	-0.001591	-0.00539	-0.004436	-0.005815	0.003992	-0.004249	0.003028	-0.002285	0.004885	0.01497	-0.005575	-0.004309	-0.0005741	-0.004742	0.01056	0.002162	0.006686	0.01148	0.02056	-0.008215	-0.001853	-0.009672	-0.008703	-0.003826	-0.007024	-0.0001106	0.009039	-0.001075	0.005749	-0.0095	-0.0032	-0.00289357	0.00677065
blood_MTCYB-rs2304693		-0.01943	0.003385	-0.01707	-0.02036	-0.003011	-0.003164	-0.01601	-0.004155	0.01849	0.003094	0.009625	-0.01058	-0.00991	0.00722	-0.01643	-0.005756	-0.008027	-0.01941	-0.006775	-0.007845	-0.06215	-0.04421	0.008189	-0.002318	0.009688	-0.001204	0.01308	0.0001053	0.009091	0.0172	0.003192	-0.02032	-0.0125	0.0097	0.00854846	-0.000269991
blood_MTCYB-rs1372635		0.001035	-0.007608	-0.001635	0.009685	-0.0007697	-0.001861	-0.009073	-0.000403	-0.004372	0.006347	-0.01331	-0.005671	0.00669	-0.01171	-0.006986	0.004017	-0.01068	-0.00953	-0.01053	-0.02026	-0.03968	-0.05299	0.005255	-0.004375	0.005572	-0.008169	-0.00605	-0.01299	0.009038	0.029	3.588e-05	0.004769	-0.0111	-0.0029	0.00253344	-0.000116816
blood_MTCYB-rs74025341		0.005805	-0.02302	0.02134	0.005526	-0.0004368	0.006276	0.0105	0.01346	-0.005464	0.009831	0.005269	0.01643	-0.00206	0.005736	-0.003394	0.01456	0.016	0.0653	-0.0004954	-0.0008928	0.04899	-0.04708	-0.02182	0.007045	-0.003278	-0.0005974	-0.006782	-9.845e-05	0.006284	-0.03671	0.0005654	-0.008226	0.0136	0.0042	-0.00612594	0.00053692
blood_MTND2-rs61940184		-0.005096	-0.008733	-0.009985	0.0004267	0.008001	0.001603	-0.01331	-0.01481	-0.02264	-0.003633	-0.005296	-0.004227	-0.01592	-0.001833	-0.01932	0.001901	-0.01578	0.02473	-0.00925	-0.007687	0.02523	-0.01086	-0.02162	-0.008476	-0.007525	-0.005347	0.002187	-0.005654	-0.01544	-0.01015	-0.003584	-0.04813	-0.0086	-0.0063	-0.000803345	-0.000672103
blood_MTND2-rs7158706		0.006403	0.0001189	0.0007453	-0.004069	0.0009957	-0.002712	0.003339	0.003856	-0.008763	0.003244	0.0004125	0.01259	-0.01827	0.01838	0.0319	0.01029	-0.0161	0.01809	0.01959	0.002866	0.01939	-0.0306	-0.006705	0.004669	0.0001882	-0.005802	-0.009244	-0.004235	-0.004626	-0.06055	0.002851	0.005926	-0.0084	-0.0031	-0.00103866	0.00170977
blood_MTND2-rs2879224		0.007583	0.01724	0.01738	-0.01304	0.0009997	-0.001225	-0.01327	0.001787	0.01335	0.003424	0.005578	0.008242	-0.003264	-0.007651	-0.01778	-0.007611	-0.003754	-0.006928	0.01007	0.0168	0.0266	-0.03419	-0.007099	0.005616	-0.001547	0.006712	-0.003023	-0.004857	-0.006691	-0.02671	0.008233	0.02356	-0.0174	-0.0029	-0.00148003	-0.000726328
blood_MTND5-rs10172506		0.05836	0.05555	0.0966	0.08504	0.05319	0.04651	0.05937	0.02858	0.03198	0.01177	0.04173	0.03186	0.06004	0.04009	0.02137	0.09469	0.08438	0.05978	0.09089	0.03985	0.03577	0.02142	0.08704	0.06477	0.1237	0.02299	0.09986	0.01711	0.04876	0.01831	0.03357	0.09226	0.0577	0.009	0.0369792	0.00595069
blood_MTND5-rs73108116		0.05109	0.06985	0.02553	-0.001448	0.006614	0.0543	0.01752	0.01447	0.03561	0.05111	0.007904	0.02705	0.06487	0.05133	0.01689	0.005922	0.06037	-0.00622	0.04316	0.04517	0.00652	-0.01873	0.009165	0.03517	0.01595	0.03536	-0.02223	0.01059	0.04883	0.01931	0.02353	0.07744	0.0208	0.0073	-0.00518787	0.013359
blood_MTCO1-rs74863981		-0.01029	-0.003196	-0.03236	-0.03957	-0.00231	-0.005357	-0.01436	-0.02337	0.01524	-0.002863	-0.01072	-0.02688	0.007739	-0.002442	0.004857	-0.01438	-0.03141	-0.02949	-0.03567	-0.006438	-0.02448	0.03916	0.007281	-0.0117	-0.008916	-0.02048	-0.04043	-0.01587	0.007352	0.03391	-0.004144	-0.02945	-0.0243	NA	NA	NA
blood_MTND3-rs76125482		-0.01468	0.004554	0.00352	-0.006316	-0.01433	0.003214	0.01464	-0.009818	0.01248	0.00978	0.01181	-0.04614	0.01186	0.007606	0.01977	-0.006896	0.03263	-0.02423	0.007811	-0.01604	0.05788	0.04319	-0.04421	0.007299	-0.04475	-0.008243	-0.0165	-0.01724	-0.005974	-0.1331	0.008121	0.001482	-0.0284	-0.0304	-0.0224623	-0.000186251
blood_MTND3-rs6885116		0.007371	0.01395	0.01806	0.003714	0.02398	-0.006612	0.03011	-0.003771	0.009206	0.01614	-0.008097	-0.003129	-0.01686	-0.007579	-0.01186	0.01172	0.03276	0.002293	0.02597	0.01062	0.05834	-0.01071	-0.009608	0.0316	0.01882	0.01627	-0.002221	0.02011	0.01222	0.0617	0.003858	0.004168	0.0149	0.0066	0.00462866	0.00515043
blood_MTND3-rs2712498		0.0121	0.01168	-0.001628	-0.01282	0.01068	-0.0008837	-0.01466	0.006843	0.00516	0.01032	-0.0003371	0.006565	-0.007994	-0.01235	-0.0008967	0.007313	0.01573	0.003701	0.009602	0.003186	0.02343	0.03743	0.01243	0.009789	0.01009	0.001403	0.008985	0.005038	0.001168	0.08151	0.003665	-0.002693	0.0105	0.0048	0.00423854	-0.00410698
blood_MTND4-rs6973982		-0.03484	-0.006899	-0.006241	-0.02365	-0.003407	-0.007308	-0.02652	-0.01765	0.005471	-0.006429	-0.008697	-0.01942	-0.01981	-0.01204	-0.02314	-0.02428	-0.0368	-0.0615	-0.01122	-0.01752	-0.07789	-0.07791	-0.004287	-0.03233	-0.006999	-0.0008642	0.009094	-0.0257	-0.005814	-0.01017	-0.008816	-0.04991	-0.0201	-0.0291	0.00597847	-0.00621163
blood_MTND4-rs11008009		-0.00329	0.006117	0.01092	-0.003905	-0.01082	0.0162	-0.008474	0.001893	0.002583	-0.006261	-0.01261	-0.01147	-0.008314	-0.01318	-0.009202	-0.00292	-0.001378	-0.01661	-0.006492	0.007744	0.01686	0.02858	0.003218	-0.003288	0.003957	-0.0006884	0.00114	0.002875	-0.01115	-0.004379	-0.001857	-0.01089	0.0082	0.007	0.0107565	0.00277001
blood_MTND1-rs2304694		0.007132	0.01804	0.01134	0.004543	0.02206	0.01335	0.004924	0.01338	0.02036	-0.004411	0.009092	0.008953	0.01721	0.02338	0.01218	0.03572	0.0163	-0.03338	0.00172	0.03499	-0.05354	-0.0405	0.01062	0.01599	0.01808	0.03561	0.01528	0.01283	0.01912	0.02896	0.02807	-0.004394	0.0149	0.0178	0.0174328	0.0105553
blood_MTND1-rs1692120		-0.00208	0.01288	-0.002504	0.005211	-0.0003293	-0.0129	-0.004442	-0.001894	-0.009122	-0.0002144	-0.002556	0.001112	-0.00283	-0.001584	-0.006745	0.02407	0.002361	0.008442	0.01308	-0.002931	-0.02101	-0.05689	-0.0068	0.005622	0.009595	0.0003812	-0.004497	-0.003917	0.0008462	0.01432	0.00137	0.008454	-0.0059	-0.0007	0.000259451	-0.00195558
blood_MTATP6-rs6973982		-0.02058	-0.00444	-0.01781	-0.02265	-0.01546	-0.02171	-0.0306	-0.009971	-0.01727	-0.02703	-0.03743	-0.01811	-0.01712	-0.01339	-0.03585	-0.03429	-0.03642	-0.04035	0.005998	-0.02629	-0.07551	-0.0663	-0.006632	-0.02976	-0.01265	-0.01049	0.001035	-0.02085	-0.01221	0.02976	0.001329	-0.04776	-0.0168	-0.0096	0.00428437	-0.0112813
blood_MTATP6-rs12792550		0.009421	-0.01327	0.01027	-0.007532	-0.01318	0.001801	-0.01012	0.001288	-0.003509	-0.01859	0.002065	0.004637	-0.0003339	-0.002614	0.008833	-0.008672	-0.01101	-0.05538	0.01323	-0.004306	0.009307	0.02021	-0.02024	-0.01574	-0.004236	0.01281	0.003783	0.001529	-0.0007894	0.03503	-0.0001084	0.008411	0.012	-0.0055	-0.00135231	-0.00462678
blood_MTATP6-rs589809		0.01705	0.004531	-0.009895	-0.001907	-0.0008311	0.007175	0.02006	0.003524	-0.008047	0.0308	-0.0005365	0.0197	-0.006537	-0.01196	0.01714	0.02371	0.0115	-0.06975	0.007536	-0.006007	-0.009412	0.03677	-0.006462	0.01679	0.002844	0.008953	0.02351	0.0119	0.01137	0.04115	0.007003	0.01793	-0.0153	-0.0011	0.00193112	-0.00123394
blood_MTCO3-rs375640557		-0.04204	0.00768	-0.002206	-0.00273	-0.004962	-0.01109	-0.02196	-0.007542	-0.01389	-0.0216	-0.01851	-0.01351	-0.01363	-0.003181	-0.01815	-0.02043	-0.02931	-0.01871	-0.01162	-0.005643	-0.01225	0.005847	-0.01052	-0.01745	-0.01494	-0.01933	-0.002737	-0.00752	-0.003136	0.03086	-0.008286	0.005047	-0.0132	-0.0105	-0.00883091	-0.00621496
blood_MTCO3-rs6973982		-0.03373	-0.009386	-0.04017	-0.04858	-0.04403	-0.01237	-0.04302	-0.01638	-0.007105	-0.0227	-0.03538	-0.03146	-0.001825	-0.01711	-0.05027	-0.01818	-0.0372	-0.04218	-0.007591	-0.01833	-0.07804	-0.0899	-0.01004	-0.02209	-0.02473	-0.009946	0.003569	-0.01869	-0.01283	0.00688	0.005924	-0.05115	-0.0281	-0.0195	-0.0194834	-0.0273109
blood_MTRNR2-rs10165864		-0.002769	-0.01844	-0.01212	-0.002286	-0.006927	0.02354	-0.01695	-0.01249	-0.005534	-0.03651	-0.03398	-0.01386	0.00552	-0.00858	-0.01208	0.009544	-0.001558	0.00375	-0.0357	-0.002654	-0.001682	0.01144	-0.001932	0.003533	-0.01153	-0.008576	-0.003623	0.01452	-0.008475	0.02553	-0.01056	-0.002644	-0.0149	-0.0027	0.00219034	0.00195986
blood_MTRNR2-rs66892251		-0.0323	0.005261	-0.002616	-0.0241	-0.01868	-0.02012	0.01416	-0.01614	-0.01567	0.008239	0.009283	-0.02405	-0.01337	0.01264	-7.113e-05	-0.0304	0.02157	-0.01148	-0.004078	0.003405	-0.01592	-0.01886	-0.01496	-0.02226	-0.02684	-0.02307	-0.04539	-0.0288	-0.01409	-0.01342	0.005616	-0.03629	-0.0149	-0.0155	-0.0231919	-0.0227998
blood_MTRNR1-rs61988269		-0.02122	0.00681	-0.009537	-0.04649	-0.007575	0.006179	-0.00719	-0.001214	-0.01824	-0.006835	-0.00559	0.02705	-0.01425	0.01357	0.01612	-0.007782	-0.004122	-0.01283	-0.0001509	-0.007072	-0.0143	0.02854	-0.02952	-0.008651	-0.01544	-0.01323	-0.01325	-0.024	-0.02386	-0.05409	-0.0112	0.01215	0.0251	0.0019	-0.00550679	-0.00580521
blood_MTRNR1-rs62014423		-0.01122	0.02234	-0.003373	0.02398	0.017	0.01192	-0.02386	0.007306	0.008149	0.002597	0.01353	0.03706	-0.004506	0.01378	-0.01037	0.006481	-0.04067	-0.009121	-0.01854	-0.01445	-0.02643	-0.01131	0.005666	0.006587	-0.0007691	-0.01223	-0.02558	-0.00101	0.01961	-0.07043	0.01597	0.01176	-0.0226	NA	NA	NA
blood_MTND4L-rs10788883		-0.01091	0.01429	-0.01806	0.02189	0.0004126	-0.02833	0.02541	0.02363	0.01226	0.003616	0.006935	0.004969	-0.02966	0.02267	0.01945	-0.006034	-0.009181	-0.009405	0.005185	-0.003366	-0.01195	-0.02382	-0.002073	0.009465	0.01012	0.009478	0.005407	0.003171	-0.004238	0.03428	0.008494	-0.01062	-0.0115	0.0042	0.00127932	-0.00689441
blood_MTND4L-rs7833624		0.005814	-0.001432	0.0076	-0.02412	0.005538	0.02424	-0.04006	-0.0408	-0.0367	-0.01218	0.006435	-0.06353	-0.06542	0.009995	0.01402	-0.02086	-0.02988	0.003069	0.02882	0.005308	-0.008268	-0.01851	0.01892	0.004475	0.009948	0.009625	0.008393	-0.002982	0.01414	-0.005937	-0.003927	-0.05156	0.0156	-0.0004	-0.00328483	0.00762024
Fat_MTND6-rs6545512		0.1004	0.08429	0.1043	0.1359	0.07978	0.01385	0.05082	0.009956	0.02472	0.02311	0.01045	-0.02282	0.05025	0.02506	0.01932	0.1292	0.134	0.07332	0.1207	0.05786	0.05267	0.06326	0.09654	0.09784	0.1371	0.03061	0.1606	0.03991	0.05025	0.04887	0.0446	0.0751	0.0613	-0.0027	0.0499211	0.0120613
Fat_MTND6-rs2304694		0.01263	0.04474	0.02842	0.04674	-0.01802	-0.006549	0.02722	-0.004921	0.0008352	-0.0399	-0.02036	-0.01542	0.01024	0.02296	0.0137	0.04726	-0.002502	0.002563	0.009814	0.06138	-0.03624	-0.01491	0.07236	-0.05961	-0.02435	0.02764	0.04365	0.02868	0.03382	0.03303	-0.004818	0.006259	0.0135	0.0025	0.0311242	0.00499055
Fat_MTND5-rs2304694		0.003701	0.01918	0.01815	0.03449	-0.004278	0.002646	0.01625	0.001213	0.01975	-0.02488	-0.004127	-0.01434	0.009988	0.01726	0.002315	0.02597	-0.003557	-0.01168	0.009516	0.03578	-0.04261	-0.02679	0.05871	-0.03206	-0.006786	0.01585	0.03676	0.02523	0.02645	0.03052	-0.004888	-0.001405	0.011	0.0049	0.0290429	0.0104075
Fat_MTND4-rs12579998		-0.002767	-0.00283	-0.006875	-0.04583	0.00448	-0.002263	0.0005942	-0.01192	-0.02535	-0.006801	-0.002766	0.02053	0.004638	-0.001469	-0.004728	-0.01238	-0.004582	0.003623	4.267e-05	0.001196	0.01141	-0.03404	-0.0292	0.001432	-0.0177	-0.001073	-0.01217	0.006838	-0.008883	-0.007331	-0.006488	-0.01606	-0.0023	0.0059	-0.0221694	-0.00668067
Fat_MTND1-rs2304694		0.007132	0.01804	0.01134	0.004543	0.02206	0.01335	0.004924	0.01338	0.02036	-0.004411	0.009092	0.008953	0.01721	0.02338	0.01218	0.03572	0.0163	-0.03338	0.00172	0.03499	-0.05354	-0.0405	0.01062	0.01599	0.01808	0.03561	0.01528	0.01283	0.01912	0.02896	0.02807	-0.004394	0.0149	0.0178	0.0174328	0.0105553
Fat_MTND1-rs12579998		-0.03577	0.001793	-0.02742	-0.006192	-0.02222	-0.01349	-0.005716	-0.01094	-0.02175	-0.0108	-0.002163	-0.01482	0.006425	-0.01328	0.002037	-0.01971	-0.005041	-0.03079	-0.005908	-0.02678	-0.001105	-0.02508	-0.03166	-0.009111	-0.01781	-0.02417	-0.02741	-0.01818	-0.02566	-0.03244	-0.01365	-0.01003	-0.0046	-0.0176	-0.0323498	-0.0213177
Fat_MTATP6-rs11049112		-0.01623	0.01023	0.004416	-0.008059	0.009822	0.002176	-0.007156	-0.01966	-0.02126	-0.02094	-0.005792	-0.01462	-0.02387	-0.01496	-0.005738	-0.002851	-2.976e-05	-0.004831	0.005312	0.002447	0.006652	-0.009013	-0.005876	0.01094	-0.0147	0.002528	-0.008174	0.0004203	-0.005118	0.01427	0.007018	0.008444	-0.0018	-0.0136	-0.0180918	-0.00582925
Fat_MTCO3-rs2304693		-0.03373	-0.009386	-0.04017	-0.04858	-0.04225	-0.01008	-0.04174	-0.01452	-0.007105	-0.0227	-0.03775	-0.0335	-0.002922	-0.01607	-0.05247	-0.01818	-0.0372	-0.04218	-0.007591	-0.01662	-0.07797	-0.0899	-0.008015	-0.02193	-0.02292	-0.008393	0.003569	-0.01961	-0.01236	0.00688	0.008697	-0.05069	-0.0281	-0.0195	-0.0194834	-0.0273109
Skin_MTCO2-rs2304693		-0.01342	-0.007997	-0.02798	-0.02578	-0.02106	-0.02691	-0.04047	-0.01429	-0.01062	-0.02072	-0.04744	-0.01855	-0.0214	-0.0122	-0.03957	-0.02538	-0.05102	-0.02076	-0.01623	-0.01331	-0.09192	-0.08809	-0.02481	-0.02885	-0.02504	-0.0121	-0.0002118	-0.02502	-0.009559	0.02133	-0.007081	-0.0586	-0.028	-0.0304	-0.00954482	-0.0216553
Skin_MTCYB-rs35644531		-0.02218	-0.014	-0.01539	-0.006343	-0.0008317	-0.0156	-0.004054	-0.005667	0.0005966	-0.002495	-0.01874	-0.03078	-0.01225	-0.008333	0.00353	-0.01017	-0.01098	0.01072	-0.02023	0.005093	0.02326	-0.008307	-0.01461	0.007854	-0.01187	-0.007959	-0.007191	0.01236	0.002346	0.01666	-0.004208	0.01429	0.0031	-0.0057	0.00272949	-0.0191634
Skin_MTND3-rs10042734		0.003733	0.008139	-8.323e-05	0.0195	0.0003132	0.01239	0.008539	0.01185	0.011	0.005447	0.005167	0.01629	0.007117	0.01493	0.01135	-0.005814	0.009682	-0.03395	0.0009867	-0.004242	0.04832	0.01298	-0.004285	0.001553	0.003896	0.01501	0.00534	-0.0002964	-0.0007852	-0.01061	-0.007731	0.01854	-0.0032	-0.0064	-0.0115755	-0.0158436
Skin_MTND1-rs11049103		-0.03625	0.0003641	-0.02605	-0.01123	-0.02554	-0.01568	-0.005034	-0.009943	-0.0231	-0.01341	0.0003478	-0.01347	0.001984	-0.01273	0.002483	-0.01914	-0.005131	-0.03419	-0.003532	-0.02713	0.003709	-0.03542	-0.02632	-0.007673	-0.01675	-0.02035	-0.01627	-0.01766	-0.02466	-0.03366	-0.01687	-0.02397	-0.006	-0.0165	-0.0323351	-0.0216466
Skin_MTCO3-rs2304693		-0.03373	-0.009386	-0.04017	-0.04858	-0.04225	-0.01008	-0.04174	-0.01452	-0.007105	-0.0227	-0.03775	-0.0335	-0.002922	-0.01607	-0.05247	-0.01818	-0.0372	-0.04218	-0.007591	-0.01662	-0.07797	-0.0899	-0.008015	-0.02193	-0.02292	-0.008393	0.003569	-0.01961	-0.01236	0.00688	0.008697	-0.05069	-0.0281	-0.0195	-0.0194834	-0.0273109
lcl_MTCO2-rs7559561		-0.005251	-0.003979	-0.001302	0.002348	-0.006966	0.01402	-0.0005795	0.00742	-0.007411	-0.002948	0.0004674	-0.01982	0.01353	-0.007664	-0.005056	0.002273	-0.009172	-0.008896	-0.008455	-0.01351	-0.006681	-0.04407	-0.00947	-0.01724	-0.005362	-0.01302	-0.009416	-0.01398	-0.005702	0.01366	-0.0107	0.004447	-0.0053	-0.0152	-0.0024538	-0.00248019
lcl_MTCO2-rs2304694		-0.01342	-0.007997	-0.02798	-0.02578	-0.02106	-0.02691	-0.04047	-0.01429	-0.01062	-0.02072	-0.04744	-0.01855	-0.0214	-0.0122	-0.03957	-0.02538	-0.05102	-0.02076	-0.01623	-0.01331	-0.09192	-0.08809	-0.02481	-0.02885	-0.02504	-0.0121	-0.0002118	-0.02502	-0.009559	0.02133	-0.007081	-0.0586	-0.0278	-0.0304	-0.00906046	-0.0211846
lcl_MTCO1-rs2627775		0.001997	0.00117	-0.007936	0.006329	0.004647	-0.006092	-0.01691	0.01478	0.003941	0.009258	0.01482	-0.02142	0.02649	0.009058	-0.01608	0.009043	0.002094	0.001178	0.001754	-7.211e-05	0.01017	-0.006966	0.02004	0.02465	-0.004262	0.005257	0.007177	0.003103	-0.0003156	-0.0242	0.03103	0.03086	0.0038	0.0172	0.00413738	0.00440606
lcl_MTND3-rs1047991		-0.007583	0.01109	0.02532	-0.01433	0.005915	0.005232	-0.00208	0.003356	-0.00858	-0.004336	0.001603	-0.01026	0.01864	0.003504	-0.01353	0.005764	-0.001535	-0.009959	0.007981	-0.01015	0.002798	-0.00172	0.003114	0.009152	9.183e-05	0.002098	0.003152	0.00873	0.009381	0.003792	0.0008623	-0.03686	0.0046	0.0173	0.00186262	0.00477763
lcl_MTND4-rs2304694		-0.03484	-0.006899	-0.006241	-0.02365	-0.002519	-0.009381	-0.02367	-0.01863	0.005471	-0.006429	-0.0102	-0.01818	-0.01909	-0.00989	-0.02089	-0.02428	-0.0368	-0.0615	-0.01122	-0.01724	-0.07986	-0.07791	-0.001626	-0.03236	-0.006367	0.001518	0.009094	-0.02666	-0.005565	-0.01017	-0.007513	-0.04886	-0.0201	-0.0291	0.00681883	-0.0062699
lcl_MTND1-rs10205130		0.0161	0.02593	0.02055	0.03007	0.01738	0.009668	-0.0008935	0.005327	0.01574	0.01444	0.0004053	0.0167	0.01025	0.00237	-0.006702	0.007763	0.01248	0.03828	0.005879	0.02406	0.01422	-0.03337	-0.001699	0.01768	0.005642	0.01321	0.01206	0.01939	0.007386	0.04089	0.0182	0.02547	0.0049	0.0225	0.0055859	0.00576201
lcl_MTND1-rs35739334		0.003844	-0.002738	0.0002945	-0.01263	-0.005169	-0.003084	-0.005353	-0.004824	-0.005527	0.0005362	-0.001181	0.004703	4.022e-05	-0.001706	-0.005616	-0.01725	-0.01707	0.01449	0.00073	-0.01597	-0.004165	0.002708	0.01003	-0.002405	-0.001219	-0.008868	-0.01496	-0.01542	-0.006232	-0.005459	-0.008346	-0.01449	-0.0063	-0.0231	-0.0118149	-0.00759019
lcl_MTATP6-rs140642797		-0.0001684	0.001349	-0.002785	-0.002046	0.01028	-0.006042	0.004014	-0.01593	-0.0004061	-0.006483	-0.01293	-0.01156	0.01	-0.01082	0.005797	0.0027	-0.004066	0.04199	0.005478	0.007542	-0.01893	0.01627	-0.008719	-0.0002085	0.005563	0.009477	-0.005933	-0.0002024	-0.006231	0.01764	0.00574	-0.05565	-0.0012	0.0167	0.0048244	0.00114303
lcl_MTCO3-rs62165226		-0.03009	0.00307	-0.007245	0.01756	-0.007192	-0.005345	-0.01285	0.001691	-0.008671	-0.01543	-0.01122	-0.005734	-0.009842	-0.01161	-0.006051	-0.01892	-0.018	-0.01983	-0.01076	-0.006974	-0.002717	0.02953	-0.008187	-0.009364	-0.009926	-0.01913	0.0006553	-0.00899	0.00761	0.02171	-0.006195	-0.002246	-0.0101	-0.0175	-0.00766796	-0.006486
lcl_MTCO3-rs2304694		-0.03373	-0.009386	-0.04017	-0.04858	-0.04225	-0.01008	-0.04174	-0.01452	-0.007105	-0.0227	-0.03775	-0.0335	-0.002922	-0.01607	-0.05247	-0.01818	-0.0372	-0.04218	-0.007591	-0.01662	-0.07797	-0.0899	-0.008015	-0.02193	-0.02292	-0.008393	0.003569	-0.01961	-0.01236	0.00688	0.008697	-0.05069	-0.028	-0.0195	-0.0194307	-0.0262378
lcl_MTRNR2-rs2304694		0.04033	-0.02081	0.02646	0.03766	-0.01194	-0.003172	0.00986	0.01369	0.01906	-0.0468	-0.015	-0.001142	-0.01593	0.01283	0.007796	0.007914	-0.02918	-0.07222	0.01996	0.001061	-0.06	-0.01506	0.02352	-0.01197	-0.002904	0.006551	0.03518	-0.02657	0.01082	0.04414	-0.02906	-0.01473	-0.0014	-0.0272	0.0100764	-0.00547942
lcl_MTRNR2-rs7297229		0.0172	-0.02302	0.0237	-0.01279	-0.006043	0.01273	0.008402	-2.324e-05	-0.003092	-0.001264	0.02826	-0.00964	-0.01844	0.006588	-0.001491	0.0003927	0.01356	-0.002548	0.004757	-0.01125	0.01751	-0.04653	0.01421	0.01927	0.01839	0.002478	-0.002454	0.001535	0.00544	0.004777	-0.0008405	0.01819	-0.0002	-0.0213	-0.0109601	-0.00692857
lcl_MTRNR1-rs78573873		0.02794	0.007834	0.02455	0.0631	-0.01245	0.007078	-0.02159	0.01813	-0.002975	-0.008087	-0.02403	-0.0006781	-0.03689	0.00999	0.008865	-0.00619	0.06454	0.02488	0.0416	-0.003171	0.007329	-0.02203	-0.03194	-0.01083	-0.0139	0.0001177	0.01441	-0.01777	0.007983	0.08702	-0.05984	-0.02452	-0.0187	0.0625	-0.0019248	-0.00254232
lcl_MTRNR1-rs2837565		0.01854	-0.04076	0.02027	-0.05588	-0.002923	-0.04473	0.006722	-0.02336	0.006356	0.001158	-0.009698	0.05893	-0.006445	0.00827	-0.03447	-0.02297	-0.04083	-0.003941	-0.02221	0.004705	0.005497	-0.02719	-0.03103	-0.0127	-0.0325	-0.01314	0.009496	0.01985	0.03117	0.02991	0.03021	-0.03966	0.0091	0.0647	0.014603	0.00226025
lcl_MTND4L-rs2304694		-0.006536	-0.009033	0.00874	-0.01362	0.00525	-0.04572	-0.01032	-0.01099	-0.004266	-0.01341	0.02188	-0.01424	-0.01386	0.01451	-0.009538	-0.02435	-0.02562	-0.05821	-0.0008579	-0.01416	-0.06769	-0.05269	0.003767	-0.02933	-0.02595	-0.01244	0.01085	-0.02003	0.0001056	-0.005782	0.0004332	-0.04417	-0.012	-0.0264	0.0114571	0.000362416
BrainPutamenbasalganglia_MTCO2-rs75035374		-0.008096	-0.009969	0.01139	-0.002309	-0.007822	0.01025	0.0625	0.04397	0.03013	0.02005	0.04051	0.05134	0.0218	0.05759	0.1001	-0.01475	0.01591	0.02325	-0.02041	0.007724	-0.05074	-0.04662	-0.01113	-0.01003	-0.003512	0.00552	-0.001825	-0.003763	-0.001185	0.07967	0.005097	-0.02587	0.0032	NA	NA	NA
HeartAtrialAppendage_MTND4L-rs138553481		-0.05681	-0.02214	-0.004132	0.02303	-0.003245	NA	NA	NA	NA	NA	NA	NA	NA	NA	NA	-0.04968	-0.01623	-0.02057	-0.004903	-0.003056	0.004417	-0.2767	-0.05376	-0.03091	-0.02464	-0.04232	-0.007013	0.001038	NA	-0.0241	-0.01585	NA	NA	NA	NA	NA
NerveTibial_MTND4L-rs932345		-0.002696	-0.003917	-0.01126	-0.03515	-0.008317	-0.004067	0.01963	0.0003986	-0.01065	0.01513	-0.001399	-0.02343	0.01217	-0.004875	0.02468	-0.01498	-0.002793	0.01569	0.0005227	-0.008479	-0.00529	-0.01555	-0.001566	-0.009435	-0.002657	-0.05654	0.01278	0.008835	-0.003624	0.03613	0.001572	-0.009125	-0.0024	0.0039	-0.00162436	0.00861432
