# Supplementary material for: Nuclear genetic regulation of the human mitochondrial transcriptome
Source: eLife journal article supplement (doi:10.7554/elife.41927), 2019-02-18
Supplement: supp [file elife-41927-supp-v1.zip › elife_poa_e41927_Supplementary_File_4.xls]

## Sheet: Legend
Supplementary File 4: Gene expression matrices for all dataset used in the study. Values show log-transformed (TPM+1) values. After transformation, outlier values were removed (3 inter-quartile ranges above/below the upper/lower quartiles respectively)

## Sheet: TwinsUK_WholeBlood
	MTND6	MTRNR2	MTATP6	MTND4L	MTND3	MTCYB	MTCO1	MTRNR1	MTND1	MTND4	MTND2	MTCO2	MTATP8	MTCO3	MTND5
ID1	3.77627	3.7447	3.94094	3.50508	3.72626	3.92703	4.05349	3.41732	3.90585	4.07041	3.80135	4.05363	3.52531	3.96285	3.64658
ID2	3.43595	3.62221	3.73257	3.207	3.56413	3.72479	3.86286	3.31644	3.81516	3.85346	3.64882	3.90581	3.31251	3.84341	3.25849
ID3	3.77472	3.63259	3.95767	3.11778	3.86484	3.98839	4.03419	3.48441	4.0727	4.05815	3.92928	4.17274	3.50232	4.08237	3.40242
ID4	3.52904	3.62595	3.83367	3.09155	3.79323	3.76951	3.8244	3.37209	3.88079	3.88415	3.69861	4.02432	3.33913	3.94998	3.16423
ID5	3.41663	3.75345	3.80596	3.15111	3.72042	3.76696	3.8459	3.4496	3.75567	3.86871	3.63297	3.96776	3.28242	3.90041	3.25131
ID6	3.60669	3.84627	3.88806	3.54696	3.70872	3.89486	3.99766	3.54656	3.9054	4.04127	3.84014	4.01605	3.45516	3.98724	3.51088
ID7	3.51798	3.6322	3.75738	3.13562	3.57507	3.73981	3.86198	3.32842	3.8318	3.84755	3.71682	3.85611	3.25119	3.82402	3.23045
ID8	3.70891	3.7721	3.87741	3.2863	3.79781	3.89678	3.97942	3.34705	3.8208	3.99247	3.67607	4.07247	3.42382	4.03546	3.40232
ID9	3.58861	3.63363	3.77394	3.30418	3.5985	3.79827	3.90776	3.35771	3.84636	3.92849	3.74293	3.87442	3.17779	3.82082	3.47182
ID10	3.72378	3.79305	3.95915	3.50625	3.73965	3.91111	4.03801	3.59129	3.95223	4.05814	3.78192	4.11238	3.59972	3.98174	3.5258
ID11	3.63164	3.67727	3.88591	3.4399	3.81304	3.901	3.90256	3.49383	3.95849	4.025	3.91405	3.98751	3.50495	3.93721	3.48389
ID12	3.64034	3.70471	4.0102	3.49811	3.72342	3.96094	3.95056	3.51099	3.86521	4.07086	3.76394	4.04209	3.49733	3.89734	3.49305
ID13	3.47284	3.66291	3.75835	3.11929	3.62515	3.76929	3.81828	3.37109	3.77608	3.8677	3.62149	3.95271	3.17486	3.8683	3.22281
ID14	3.72771	3.71703	3.90621	3.3922	3.59377	3.8589	4.04024	3.44868	3.95617	4.02272	3.79404	4.01923	3.35501	3.98601	3.58416
ID15	3.60572	3.90558	3.8663	3.20003	3.72331	3.91497	3.97406	3.64406	4.05815	4.03449	3.86384	4.00464	3.24226	3.99266	3.45553
ID16	3.34353	3.40271	3.5339	3.04725	3.40307	3.55828	3.63149	3.14051	3.62794	3.66894	3.50103	3.70962	3.12559	3.68897	3.11471
ID17	3.62774	3.70214	3.86857	3.46127	3.69957	3.8279	3.9635	3.38495	3.82034	3.96573	3.77071	3.94041	3.50448	3.8915	3.50192
ID18	3.66698	3.76319	3.94402	3.48582	3.78285	3.92377	3.91395	3.5126	3.9352	4.08666	3.82996	4.06017	3.49773	4.01126	3.53356
ID19	3.36236	3.71294	3.68961	3.19482	3.47203	3.61227	3.67479	3.44328	3.7648	3.74537	3.52982	3.78335	3.27046	3.69861	3.24659
ID20	3.11961	3.48321	3.37227	2.90049	3.18248	3.33635	3.38674	3.4299	3.44578	3.46003	3.27708	3.47897	2.90445	3.37892	2.99924
ID21	3.48896	3.48915	3.64099	2.89183	3.37875	3.59741	3.80718	3.21218	3.7375	3.70107	3.57742	3.8667	3.05851	3.7546	3.09222
ID22	3.58312	3.74362	3.8271	3.35691	3.61646	3.79147	3.91457	3.47879	3.88305	3.96664	3.75504	3.9545	3.37003	3.88248	3.43305
ID23	3.38992	3.61961	3.61983	3.27741	3.47709	3.65512	3.71977	3.33244	3.70075	3.81781	3.53643	3.72948	3.12595	3.71041	3.32147
ID24	3.56107	3.75445	3.8641	3.34947	3.69231	3.84493	3.90745	3.32462	3.88197	3.92864	3.77681	3.98771	3.41928	3.97798	3.39571
ID25	3.51774	3.84017	3.78957	3.27209	3.71592	3.77438	3.89457	3.53072	3.86854	3.8565	3.70937	3.97804	3.39974	3.88202	3.25947
ID26	3.51622	3.75522	3.7201	3.28615	3.58586	3.7466	3.83571	3.48923	3.7476	3.88004	3.67492	3.88373	3.32356	3.80187	3.36339
ID27	3.53178	3.63518	3.76963	3.37568	3.61349	3.73007	3.86512	3.33574	3.84609	3.90654	3.685	3.8846	3.36457	3.79477	3.42236
ID28	3.70236	3.93667	3.95833	3.41425	3.70171	4.00235	4.07735	3.66365	4.00161	4.12883	3.85365	4.13828	3.54421	4.07743	3.62838
ID29	3.65134	3.61351	3.84169	3.28837	3.61531	3.83859	3.95927	3.2964	3.88959	3.9954	3.78775	3.89552	3.22664	3.85496	3.51481
ID30	3.49313	3.59269	3.69447	3.23725	3.56036	3.69659	3.83765	3.37753	3.72903	3.83361	3.62393	3.83689	3.23124	3.75767	3.30117
ID31	3.34159	3.8231	3.62148	3.14198	3.61176	3.59141	3.63061	3.48451	3.65077	3.72225	3.56254	3.78245	3.20864	3.74229	3.13221
ID32	3.36961	3.49076	3.66054	3.01856	3.54378	3.62085	3.6322	3.25383	3.71743	3.74332	3.54444	3.77782	3.19778	3.69404	3.07093
ID33	3.25027	3.58242	3.56782	3.04569	3.4727	3.52881	3.60829	3.33604	3.60672	3.66472	3.50123	3.68905	3.10889	3.65334	3.06038
ID34	3.66072	3.62968	3.86193	3.28926	3.66634	3.85631	3.95609	3.3164	3.87064	3.96845	3.75229	4.00258	3.37079	3.93533	3.40184
ID35	3.60311	3.70396	3.74382	3.34257	3.65475	3.79731	3.86973	3.37991	3.81441	3.90757	3.7335	3.8995	3.35498	3.90789	3.43551
ID36	3.40095	3.66695	3.78264	3.12445	3.49187	3.75483	3.81856	3.29585	3.76446	3.85135	3.65335	3.81175	3.21557	3.79878	3.3303
ID37	3.44965	3.849	3.78445	3.29669	3.64346	3.70949	3.84014	3.45631	3.82274	3.86274	3.65149	3.9265	3.27271	3.88859	3.30181
ID38	3.31424	3.5432	3.49454	3.02946	3.38306	3.54112	3.62722	3.2764	3.54162	3.65237	3.44197	3.65514	3.00997	3.60256	3.15822
ID39	3.59655	3.89821	3.87951	3.28857	3.84828	3.87	3.93837	3.49919	3.86446	3.9284	3.77798	3.97781	3.37468	4.14611	3.30748
ID40	3.77675	3.91746	3.99006	3.53155	3.85839	3.98635	4.07969	3.60098	4.00235	4.11473	3.89887	4.12166	3.56507	4.08517	3.57512
ID41	3.9961	3.93971	4.32904	3.68537	4.08724	4.25121	4.38127	3.63071	4.37458	4.48449	4.16807	4.40239	NA	4.30752	3.87955
ID42	3.66178	3.84577	3.8421	3.26008	3.70644	3.88612	3.92818	3.48235	3.85267	4.01215	3.84854	3.97537	3.259	3.93018	3.43791
ID43	3.6945	3.7842	3.89597	3.28218	3.78009	3.92122	3.97554	3.40713	3.96684	4.01794	3.7353	4.05751	3.39317	4.01278	3.39226
ID44	3.45472	3.62083	3.71	3.18438	3.51788	3.7451	3.84022	3.23993	3.81919	3.8282	3.64531	3.88716	3.21881	3.80371	3.21982
ID45	3.65024	3.6279	3.93191	3.49695	3.70749	3.83833	4.00173	3.36551	3.93939	4.05015	3.80575	4.01486	3.56386	4.01705	3.52382
ID46	3.63472	3.68199	3.7971	3.29458	3.56346	3.79401	3.92003	3.34964	3.77108	3.91904	3.64431	3.89599	3.3175	3.89053	3.49609
ID47	3.30809	3.71103	3.60347	3.13893	3.49828	3.58721	3.74098	3.4114	3.6884	3.7135	3.56578	3.70526	3.19907	3.68448	3.18199
ID48	3.69195	3.76391	3.84185	3.35553	3.77359	3.99572	3.9532	3.43241	4.08981	4.08757	3.88176	4.13851	3.56986	4.13397	3.44992
ID49	3.54161	3.70724	3.71561	3.2309	3.55613	3.67039	3.88418	3.32261	3.83054	3.7941	3.64998	3.88388	3.40056	3.78446	3.32829
ID50	3.58719	3.63376	3.80778	3.10264	3.71278	3.78785	3.87289	3.51607	3.90409	3.94421	3.74251	3.99719	3.27515	3.93896	3.24616
ID51	3.52849	3.88209	3.82223	3.30894	3.6428	3.84108	3.96996	3.58271	3.89921	3.94663	3.86708	3.96516	3.26248	3.9545	3.43261
ID52	3.76619	3.79557	4.03884	3.53548	3.83186	4.05893	4.17257	3.48552	4.01502	4.17034	3.8911	4.20578	3.52893	4.17185	3.62067
ID53	3.40665	3.6438	3.66816	3.25735	3.56047	3.65467	3.7736	3.33521	3.60256	3.75581	3.52347	3.81014	3.35533	3.7283	3.23883
ID54	3.71888	3.60482	3.91837	3.44327	3.79346	3.93265	3.97867	3.3823	3.96975	4.09121	3.86398	4.05345	3.46997	3.98583	3.50143
ID55	3.87714	3.90443	4.0264	3.30502	3.74778	4.0798	4.17749	3.63992	4.16361	4.18836	4.03556	4.18714	3.4004	4.08778	3.69563
ID56	3.47475	3.539	3.64264	2.97746	3.40825	3.63059	3.8004	3.12312	3.6382	3.7648	3.38913	3.81583	2.9309	3.72062	3.23131
ID57	3.71676	3.75064	3.98071	3.51626	3.77864	3.97571	4.11369	3.40945	4.05321	4.12223	3.88401	4.10513	3.46618	4.01445	3.6125
ID58	3.4547	3.57825	3.63947	3.2716	3.47968	3.65304	3.89988	3.2946	3.87185	3.91187	3.71437	3.86767	3.24751	3.83929	3.3073
ID59	3.49217	3.66028	3.89115	3.33174	3.71119	3.82648	3.92838	3.39433	3.86896	3.96403	3.74995	3.95634	3.40562	3.94443	3.34925
ID60	3.83694	4.01132	4.06068	3.63406	3.92993	4.03298	4.18203	3.80579	4.08487	4.1753	3.96836	4.19764	3.67794	4.14271	3.66853
ID61	3.62735	3.719	3.77169	3.23647	3.65536	3.8214	3.92068	3.39631	3.90341	3.92374	3.71733	3.95359	3.22574	3.83446	3.47154
ID62	3.55864	3.69969	3.72071	3.1952	3.5677	3.78787	3.8803	3.37457	3.82251	3.84291	3.65507	3.8788	3.22019	3.83534	3.34318
ID63	3.66174	3.78986	3.83457	3.40247	3.67397	3.87988	3.97909	3.42977	3.88703	4.00276	3.78059	3.94859	3.34345	3.93481	3.55232
ID64	3.52002	3.63115	3.83692	3.36312	3.68158	3.81382	3.94849	3.31058	3.94725	3.94641	3.74621	3.97878	3.35517	3.94228	3.39787
ID65	3.44011	3.8439	3.76016	3.19291	3.55082	3.77533	3.91163	3.62184	3.76324	3.84646	3.62389	3.90863	3.23767	3.7666	3.33496
ID66	3.80428	3.94568	4.06522	3.51595	3.83354	4.07286	4.20345	3.51749	4.08209	4.17922	3.91988	4.19864	3.70083	4.17864	3.72252
ID67	3.55688	3.5005	3.78281	3.20723	3.55056	3.76787	3.96513	3.2327	3.85229	3.89086	3.6283	3.9281	3.23514	3.85638	3.37559
ID68	3.40142	3.5566	3.72032	3.15435	3.6373	3.72408	3.76962	3.24652	3.70446	3.80895	3.60142	3.84824	3.1672	3.85273	3.15728
ID69	3.57561	3.65077	3.89547	3.41992	3.74184	3.83467	3.89898	3.35529	3.86371	4.0079	3.74703	4.02698	3.43742	3.9752	3.3969
ID70	3.30097	3.97805	3.75016	3.25268	3.61446	3.68805	3.75663	3.75456	3.8474	3.80716	3.66105	3.87144	3.34458	3.84495	3.26844
ID71	3.6464	3.91761	3.96728	3.46249	3.79399	3.94916	3.97109	3.63546	3.93762	4.04164	3.81715	4.05536	3.6344	3.90374	3.49348
ID72	3.50313	3.7837	3.76645	3.28815	3.6027	3.75836	3.87504	3.35267	3.80529	3.89414	3.61451	3.85907	3.26136	3.81529	3.39467
ID73	3.51702	3.73313	3.85103	3.27497	3.66833	3.88811	3.95391	3.4501	3.91606	3.95125	3.7641	4.01357	3.41701	3.97185	3.43303
ID74	3.70056	3.63918	3.90208	3.22629	3.7283	3.90542	3.99748	3.50041	3.94905	4.01377	3.77808	4.07996	3.29614	4.01185	3.37394
ID75	3.6858	3.8174	3.89842	3.39024	3.7027	3.92847	4.04426	3.51057	3.94542	4.02754	3.81268	3.97063	3.362	3.9982	3.5616
ID76	3.48607	3.57799	3.76916	3.23691	3.55237	3.66069	3.85534	3.18859	3.7233	3.84916	3.5045	3.91623	3.27619	3.68543	3.26536
ID77	3.37375	3.46943	3.71569	3.19637	3.47929	3.64744	3.73768	3.32651	3.77047	3.79123	3.61961	3.81597	3.30005	3.76437	3.1777
ID78	3.83651	3.67403	3.92581	3.19702	3.85466	3.97412	3.98211	3.54969	4.01248	4.06217	3.81957	4.09514	3.37042	4.02877	3.45539
ID79	3.70287	3.61577	3.94011	3.40928	3.69886	3.94782	4.1109	3.29831	3.97317	4.08627	3.78581	4.05647	3.34062	4.03229	3.54761
ID80	3.5584	3.68243	3.76005	2.96573	3.66708	3.72291	3.80633	3.52645	3.72922	3.79213	3.6795	3.94713	3.17399	3.88407	3.09833
ID81	3.62172	3.69382	3.86951	3.14412	3.7524	3.86062	3.94904	3.45369	3.92367	3.9112	3.74672	4.01516	3.36763	3.94875	3.33142
ID82	3.44965	3.59847	3.85679	3.34182	3.64123	3.77356	3.77896	3.30845	3.64964	3.92753	3.57435	3.94118	3.32546	3.72432	3.30345
ID83	3.68826	3.77365	3.92831	3.45492	3.65025	3.91107	4.03788	3.59435	4.0516	4.10103	3.90308	4.05479	3.42742	3.98357	3.59747
ID84	3.58952	3.93222	3.91541	3.41399	3.79393	3.91945	4.03196	3.50436	3.90655	4.04532	3.8259	4.03324	3.50981	4.06684	3.56969
ID85	3.70726	3.70674	3.86242	3.28758	3.71231	3.86192	3.97586	3.45375	3.85588	3.96714	3.7573	3.97966	3.32415	3.90604	3.47032
ID86	3.75422	3.78853	4.00862	3.43599	3.86213	4.04514	4.06717	3.56852	3.99771	4.13874	3.91682	4.14206	3.48572	4.07689	3.51395
ID87	3.30148	3.59274	3.59722	3.20241	3.51363	3.5395	3.70572	3.18013	3.48196	3.7078	3.45353	3.7344	3.23418	3.62617	3.17236
ID88	3.76164	3.79165	4.02223	3.16849	3.92274	3.97585	4.07435	3.36858	4.08256	4.02861	3.86264	4.1758	3.55497	4.13821	3.32159
ID89	3.62051	3.83466	3.96092	3.35117	3.71111	3.9749	4.12626	3.42558	4.02374	4.08824	3.81172	4.21519	3.52439	4.09282	3.52997
ID90	3.58313	3.73985	3.8193	3.34312	3.64605	3.80863	3.97882	3.3934	3.82787	3.95666	3.68954	3.96948	3.41976	3.92027	3.42326
ID91	3.67627	3.58752	3.9171	3.32246	3.63596	3.92652	3.9605	3.36008	4.04346	4.05974	3.82643	4.05003	3.34475	3.94684	3.46475
ID92	3.52263	3.6609	3.66864	3.16886	3.5499	3.67991	3.70721	3.35978	3.7533	3.82245	3.61311	3.7985	3.19133	3.71992	3.32417
ID93	3.54465	3.71789	3.77653	3.2976	3.70145	3.73933	3.93197	3.42886	3.8005	3.90995	3.69757	3.91373	3.33568	3.90469	3.37332
ID94	3.22555	3.99885	3.58441	3.1803	3.63502	3.52831	3.67002	3.67345	3.69614	3.67032	3.5584	3.70866	3.18854	3.76248	3.12733
ID95	3.64006	3.73229	3.76289	3.36292	3.67084	3.81294	3.92957	3.45005	3.82418	3.94834	3.70176	3.97238	3.334	3.85543	3.47628
ID96	3.84784	3.81286	4.02899	3.51503	3.78727	4.01119	4.13727	3.44319	4.00829	4.14025	3.89099	4.12248	3.73967	4.11963	3.71933
ID97	3.59783	3.72905	3.82065	3.32171	3.69477	3.80748	3.91765	3.43544	3.82202	3.96796	3.71328	3.96179	3.39804	3.90923	3.37903
ID98	3.71141	3.91045	4.0044	3.5114	3.78209	4.00636	4.07194	3.58006	4.04948	4.13003	3.89387	4.1243	3.70616	4.07461	3.61764
ID99	3.49487	3.65705	3.68929	3.23944	3.4726	3.74028	3.91928	3.36018	3.77374	3.83206	3.61518	3.8426	3.26432	3.77962	3.3647
ID100	3.71491	4.01361	4.10256	3.52167	3.75349	4.07335	4.16436	3.71308	4.11484	4.16712	3.97984	4.1146	3.53829	4.11906	3.68319
ID101	3.67579	3.67869	3.9034	3.34897	3.58823	3.89164	3.93746	3.15264	3.84223	4.05012	3.67196	3.95635	3.35846	3.93093	3.53276
ID102	3.61224	3.85437	3.90986	3.35202	3.64765	3.84582	4.01366	3.32791	3.83791	3.9943	3.76649	3.95993	3.42329	3.94583	3.51642
ID103	3.57947	3.69084	3.88227	3.39855	3.81609	3.87641	4.02166	3.36446	3.88669	3.97265	3.78974	4.04349	3.45217	4.01385	3.40778
ID104	3.6519	3.78846	3.88719	3.36786	3.72867	3.89687	3.98388	3.54564	3.88784	4.01359	3.81219	3.99799	3.43862	3.99017	3.47063
ID105	3.54339	3.70565	3.75873	3.26815	3.54594	3.73249	3.85028	3.35212	3.83678	3.86898	3.61199	3.88205	3.32792	3.81335	3.38676
ID106	3.65793	3.56665	3.73914	3.0604	3.56909	3.76861	3.88213	3.28049	3.81862	3.87521	3.54616	3.92352	3.13251	3.84333	3.3329
ID107	3.73119	3.76358	3.98587	3.49421	3.82902	3.9685	4.05569	3.47775	4.02767	4.11787	3.90246	4.08646	3.53053	4.06363	3.53209
ID108	3.77883	3.76114	3.99651	3.44039	3.91219	3.95912	4.13928	3.36944	3.95684	4.13039	3.77507	4.18634	3.50901	4.17225	3.4998
ID109	3.62814	3.73209	3.88279	3.2621	3.74998	3.89131	4.00046	3.42643	3.89381	3.94539	3.77878	4.03876	3.42378	4.01236	3.37037
ID110	3.47702	3.78089	3.78111	3.24501	3.7549	3.79624	3.89516	3.5158	3.83449	3.91488	3.71509	4.00252	3.26479	3.92524	3.2542
ID111	3.53437	3.64241	3.66328	3.1314	3.49251	3.61804	3.76653	3.31818	3.76386	3.78046	3.72729	3.7076	3.14565	3.67092	3.37099
ID112	3.63388	3.72425	3.8489	3.42594	3.62965	3.8606	4.00726	3.47867	3.92464	4.02204	3.78068	4.00606	3.37629	3.93967	3.5046
ID113	3.52492	3.61692	3.94927	3.33801	3.77879	3.86726	4.00992	3.24564	3.8138	3.99731	3.71341	4.08273	3.40235	3.99363	3.3539
ID114	3.40469	3.62071	3.64377	3.0859	3.50855	3.63016	3.80392	3.28314	3.66174	3.75453	3.50863	3.80589	3.04713	3.7835	3.22761
ID115	3.59807	3.61449	3.83773	3.19252	3.69928	3.87018	3.93989	3.3413	3.88531	3.93467	3.71883	4.0081	3.36293	3.95658	3.2926
ID116	3.71268	3.55614	3.86808	3.20071	3.76154	3.92507	3.9209	3.39972	3.93608	4.00344	3.75439	4.03711	3.27675	4.00313	3.41215
ID117	3.73364	3.8289	3.83352	3.42109	3.68973	3.84708	4.00964	3.60764	3.90934	3.96174	3.81792	3.92651	3.4477	3.88077	3.57731
ID118	3.47989	3.64262	3.75161	3.17224	3.54773	3.78018	3.83271	3.32358	3.75141	3.93902	3.64746	3.89627	3.23837	3.80326	3.39353
ID119	3.81132	3.68358	4.02458	3.56507	3.88659	4.01217	4.07922	3.46572	4.08532	4.18247	3.95091	4.15871	3.61556	4.07731	3.60697
ID120	3.53993	3.68185	3.81757	3.37534	3.66792	3.74877	3.7148	3.37154	3.73461	3.91136	3.64856	3.92764	3.4879	3.8885	3.35288
ID121	3.53074	3.50793	3.78544	3.32425	3.5556	3.76921	3.87791	3.27283	3.83376	3.90988	3.70639	3.90158	3.35599	3.83672	3.35149
ID122	3.30195	3.53267	3.53238	3.10606	3.2812	3.45761	3.63983	3.27906	3.58976	3.60847	3.41986	3.66027	3.20609	3.61779	3.17363
ID123	3.77226	3.78211	3.94683	3.2865	3.62103	3.92921	3.98944	3.5629	3.96857	4.04741	3.80269	4.08153	3.41889	3.99932	3.47197
ID124	3.71875	3.73021	3.88497	3.43988	3.66462	3.90546	4.09431	3.45743	4.00504	4.00956	3.84729	4.00197	3.47347	3.97322	3.56287
ID125	3.80341	3.80098	4.00551	3.50117	3.84261	4.05908	4.10082	3.49228	4.04514	4.16627	3.92395	4.13844	3.45183	4.09327	3.64183
ID126	3.55072	3.67126	3.77542	3.18339	3.4859	3.7482	3.97896	3.34614	3.79354	3.83591	3.63162	3.92594	3.2023	3.90357	3.41054
ID127	3.67319	3.80979	3.98551	3.46253	3.69568	3.95699	4.17836	3.41797	3.98761	4.09593	3.97386	4.11089	3.66137	4.10379	3.63752
ID128	3.5614	3.67668	3.83904	3.27375	3.70775	3.82306	3.8891	3.42865	3.83655	3.94837	3.70814	3.98054	3.35528	3.93693	3.33771
ID129	3.2216	3.46705	3.45156	2.99184	3.26663	3.4602	3.51696	3.07281	3.5558	3.57036	3.35245	3.51549	3.10212	3.43491	3.07174
ID130	3.406	3.65904	3.73777	3.09314	3.4783	3.68505	3.79259	3.31679	3.68253	3.79227	3.62874	3.76411	3.06618	3.74053	3.28341
ID131	3.68208	3.80897	3.93108	3.57862	3.72989	3.88783	4.02909	3.46957	3.90561	4.04596	3.75498	4.0021	3.5454	3.95843	3.58422
ID132	3.51753	3.63271	3.83335	3.39888	3.62562	3.7964	3.98384	3.26582	3.91253	4.0281	3.71053	4.03812	3.29152	4.03553	3.43145
ID133	3.57941	3.69523	3.58907	3.28051	3.62426	3.80758	3.93061	3.45058	3.8717	3.93974	3.7056	3.95504	3.08295	3.96584	3.42068
ID134	3.46694	3.71575	3.72089	3.26313	3.57221	3.70173	3.88529	3.20904	3.68698	3.79854	3.46909	3.87205	3.37043	3.81762	3.32441
ID135	3.57589	3.65587	3.90492	3.50148	3.73255	3.84726	3.99589	3.36039	3.86193	4.04613	3.77921	4.03032	3.44084	3.92323	3.46599
ID136	3.92992	3.87297	4.0603	3.55872	3.97837	4.11502	4.26561	3.48473	4.09825	4.19396	4.0671	4.21279	3.51239	4.32313	3.71471
ID137	3.56198	3.66158	3.77379	3.29947	3.6878	3.81513	3.87246	3.39895	3.84046	3.96812	3.66502	3.94997	3.19979	3.78994	3.40986
ID138	3.54737	3.62394	3.91879	3.35245	3.58845	3.81004	3.91235	3.35651	3.92831	3.97407	3.71834	3.97987	3.40548	3.83493	3.35471
ID139	3.73782	3.74537	3.94835	3.43472	3.77112	3.94524	4.0734	3.48915	3.94591	4.07189	3.87184	4.12287	3.48583	4.06442	3.58631
ID140	3.30069	NA	3.74585	3.24595	3.7598	3.58946	3.78954	NA	3.85464	3.81158	3.67048	3.92024	3.23414	3.90759	3.19109
ID141	3.57168	3.65902	3.76973	3.22099	3.38234	3.75532	3.91965	3.33799	3.81129	3.85721	3.67243	3.87656	3.25074	3.90731	3.41041
ID142	3.5904	3.72912	3.85736	3.33169	3.6649	3.85864	3.92138	3.43225	3.89837	3.97039	3.78949	3.97952	3.47442	3.89357	3.4185
ID143	3.6321	3.56598	3.84891	3.19484	3.70412	3.85471	3.82833	3.33436	3.84001	3.92644	3.72749	3.987	3.35054	3.81395	3.33207
ID144	3.09485	3.46728	3.40699	3.00623	3.27789	3.38329	3.45436	3.27371	3.47245	3.53658	3.35592	3.52878	2.99527	3.49351	2.95356
ID145	3.76721	3.86147	4.08397	3.45342	3.7607	4.05453	4.12638	3.60956	4.10262	4.15779	3.89577	4.17426	3.54203	4.12998	3.59773
ID146	3.71148	3.94963	3.99201	3.50892	3.82886	4.01527	4.13664	3.55128	4.00475	4.14348	3.87729	4.15333	3.54696	4.06863	3.66454
ID147	3.7532	4.02288	3.9516	3.3838	3.85613	3.99851	3.98504	3.92288	4.00955	4.04953	3.88765	4.12231	3.46271	4.05103	3.51026
ID148	3.63626	3.85014	3.85704	3.37826	3.64305	3.83423	3.92101	3.46945	3.90423	3.95483	3.74298	3.97422	3.41929	3.86363	3.49545
ID149	3.5487	3.65296	3.78495	3.23529	3.63458	3.77801	3.87286	3.23653	3.82605	3.89165	3.66184	3.90299	3.22621	3.88803	3.34458
ID150	3.68785	3.74026	3.83167	3.41917	3.67154	3.86153	4.00922	3.42215	3.82738	4.00716	3.71943	3.98308	3.28082	3.93016	3.58815
ID151	3.52378	3.5994	3.71651	3.07427	3.62504	3.75459	3.798	3.38798	3.80437	3.83174	3.65952	3.89153	3.12953	3.87687	3.24235
ID152	3.56719	3.57082	3.74915	3.1652	3.65798	3.7285	3.899	3.20227	3.72066	3.89239	3.54544	3.96598	3.2425	3.94645	3.26596
ID153	3.68814	3.77863	3.82764	3.45854	3.64946	3.88447	3.98209	3.51976	3.89324	4.01262	3.73988	3.98173	3.397	3.88527	3.57367
ID154	3.79075	3.58963	3.94772	3.38179	3.72186	3.99618	4.01859	3.35583	4.0228	4.11423	3.90056	4.05574	3.33863	3.94803	3.60999
ID155	3.67351	3.91354	3.82536	3.58734	3.75135	3.81745	3.93543	3.53752	3.8193	3.96923	3.71125	3.92278	3.72931	3.98585	3.59266
ID156	3.69577	3.83713	3.88293	3.43619	3.7267	3.90009	3.98431	3.55098	3.95366	4.00683	3.79164	4.00453	3.45757	3.91903	3.55915
ID157	3.67748	3.98751	4.00077	3.50367	3.95277	3.96993	4.04768	3.45797	3.88601	4.06875	3.83305	4.12729	3.60793	4.17141	3.5198
ID158	3.82069	3.65113	4.0054	3.38107	3.83444	3.99929	4.05983	3.46941	4.04436	4.1188	3.87266	4.12632	3.44464	4.06539	3.54006
ID159	3.66475	3.6796	3.83863	3.25277	3.52133	3.87941	3.97717	3.35256	3.89367	4.04645	3.84728	3.97175	3.20572	3.90718	3.48658
ID160	3.5345	3.62307	3.93058	3.46515	3.6424	3.87312	4.0225	3.33345	3.90473	4.05649	3.7323	4.09014	3.46026	4.04824	3.46907
ID161	3.7801	3.96064	4.01511	3.47014	3.83911	4.02365	4.11875	3.57707	3.9746	4.1457	3.95769	4.07789	3.47695	4.06156	3.67888
ID162	3.6516	3.69738	3.8797	3.42428	3.58731	3.79217	3.99309	3.37053	3.90009	4.00864	3.74885	4.01952	3.42937	3.95475	3.53291
ID163	3.54108	3.68921	3.82236	3.31773	3.58422	3.79323	3.92211	3.33743	3.89792	3.93449	3.67884	3.9662	3.29565	3.89552	3.33328
ID164	3.5547	3.7856	3.83143	3.33324	3.67023	3.80652	3.91497	3.53472	3.88665	3.96309	3.76159	3.9756	3.34744	3.88811	3.41925
ID165	3.56316	3.65316	3.87463	3.37237	3.69178	3.85726	3.93237	3.44272	3.91531	4.01438	3.76458	4.00965	3.39392	3.94667	3.37064
ID166	3.45178	3.64702	3.65228	3.17852	3.50401	3.66003	3.77301	3.31833	3.71886	3.77318	3.58019	3.75153	3.22261	3.74733	3.29294
ID167	3.70686	3.75446	4.00153	3.50201	3.76228	4.04582	4.08483	3.47996	4.0702	4.15464	3.91386	4.11711	3.59435	4.01751	3.65122
ID168	3.74622	3.61931	3.88234	3.37828	3.69438	3.87992	3.98131	3.33687	3.88846	4.00261	3.78017	3.98491	3.38387	3.90489	3.52122
ID169	3.55344	3.68322	3.81773	3.18677	3.76822	3.70547	3.85927	3.32301	3.81912	3.93034	3.68508	4.07608	3.36367	3.95347	3.16676
ID170	3.71293	3.8836	3.88382	3.48893	3.69284	3.85462	4.00143	3.57277	3.88843	4.00928	3.73058	3.95858	3.51196	3.89137	3.59883
ID171	3.64682	3.80103	3.87838	3.27845	3.53005	3.84504	4.11394	3.34647	3.90581	4.03652	3.73044	4.0144	3.27203	4.03063	3.5518
ID172	3.60589	3.71408	3.85814	3.38756	3.70915	3.87726	3.94849	3.40306	3.94335	3.97993	3.72302	3.98418	3.43132	3.93405	3.35764
ID173	3.53353	3.77366	3.79043	3.34035	3.73188	3.81643	3.96456	3.3901	3.77503	3.96739	3.72233	3.96011	3.30467	3.97866	3.45901
ID174	3.71674	3.79783	3.88306	3.33388	3.69109	3.90713	4.02479	3.66064	3.93596	3.9823	3.80409	4.00367	3.40937	3.94768	3.5251
ID175	3.64596	3.68854	3.59151	3.3335	3.63365	3.8512	3.97904	3.41613	3.90426	4.01005	3.73577	3.98928	3.05179	4.00001	3.46638
ID176	3.65393	3.79077	3.9584	3.16373	3.80948	3.89825	4.07734	3.29661	4.00631	4.00265	3.74302	4.11889	3.47875	4.07018	3.34567
ID177	3.65513	3.86242	3.91684	3.41772	3.72264	3.89448	3.97117	3.61177	3.96348	4.05158	3.7928	4.02781	3.42573	3.96016	3.50395
ID178	3.67831	3.66419	3.91219	3.31384	3.59626	3.90564	3.97699	3.34474	3.93471	4.00635	3.79397	3.99538	3.43231	3.91163	3.46751
ID179	3.52194	3.78725	3.82273	3.47963	3.61775	3.83179	3.90857	3.4602	3.83764	3.97135	3.75958	3.94095	3.39671	3.90565	3.43942
ID180	3.39378	3.64161	3.67131	3.21738	3.50387	3.62181	3.77839	3.28217	3.79735	3.76205	3.57526	3.7659	3.36322	3.67704	3.26439
ID181	3.16046	3.53803	3.40233	2.71174	3.22562	3.45244	3.52725	3.16257	3.56509	3.5349	3.36797	3.52274	2.80115	3.50717	2.98884
ID182	3.92306	3.86162	4.13599	3.45966	3.96484	4.17741	4.17054	3.62604	4.14592	4.23163	3.99786	4.2778	3.6565	4.23531	3.63072
ID183	3.54034	3.63262	3.75722	3.21761	3.5283	3.75698	3.88369	3.45032	3.77604	3.87688	3.6505	3.88384	3.23462	3.76854	3.39502
ID184	3.72592	3.60953	3.87602	3.21154	3.81615	3.8884	3.93017	3.35405	3.91666	3.99203	3.77063	4.05306	3.2882	3.99846	3.39661
ID185	3.41021	3.5448	3.74831	3.16483	3.56757	3.65816	3.85067	3.22988	3.77	3.81836	3.58654	3.83941	3.22095	3.83155	3.23179
ID186	3.6065	3.72852	3.77753	3.35182	3.67205	3.7954	3.97052	3.38135	3.8254	3.92985	3.73401	3.86954	3.31364	3.85157	3.49294
ID187	3.56412	3.64941	3.84855	3.33034	3.64038	3.85888	3.82793	3.38395	3.87147	3.95413	3.75819	3.91903	3.43394	3.84461	3.40965
ID188	3.50743	3.8417	3.78259	3.33096	3.56176	3.72888	3.90309	3.53803	3.75452	3.89391	3.62589	3.89557	3.41107	3.82785	3.40836
ID189	3.53917	3.66535	3.79675	3.10971	3.62999	3.7603	3.91245	3.42372	3.88289	3.89289	3.70542	3.89832	3.207	3.84813	3.294
ID190	3.7649	3.73395	3.85319	3.08921	3.65504	3.84813	3.93639	3.43639	3.91097	3.93899	3.76373	3.98736	3.19716	3.90111	3.38384
ID191	3.62182	3.93522	3.94787	3.44542	3.70554	3.88279	4.00156	3.61478	3.94298	4.01499	3.80202	3.9936	3.54909	3.97206	3.54732
ID192	3.65478	3.77427	3.84456	3.34497	3.65723	3.85117	3.96059	3.53431	3.87667	3.97925	3.76199	3.95921	3.307	3.89718	3.49073
ID193	3.32993	3.71933	3.6368	3.12605	3.5156	3.7348	3.80665	3.352	3.74171	3.79868	3.60925	3.82529	3.06654	3.81718	3.2605
ID194	3.59728	3.77475	3.64876	3.27582	3.36364	3.69585	3.74714	3.40935	3.79806	3.83762	3.67736	3.75247	3.36881	3.74336	3.39991
ID195	3.56059	3.72749	3.7468	3.24039	3.52464	3.74762	3.91645	3.386	3.76995	3.87618	3.79938	3.86142	3.22774	3.85822	3.40596
ID196	3.3965	3.56832	3.62242	3.23836	3.53482	3.64603	3.70504	3.27669	3.70537	3.73705	3.58803	3.7674	3.29907	3.73874	3.21592
ID197	3.33649	3.60398	3.60117	3.1119	3.47395	3.60846	3.73192	3.31895	3.68181	3.70202	3.54659	3.73564	3.06341	3.71821	3.20883
ID198	3.57867	3.70768	3.87425	3.37287	3.68341	3.87724	3.93368	3.42826	3.93396	4.0066	3.77754	3.96232	3.49454	3.95465	3.47396
ID199	3.72375	3.67095	3.90043	3.39395	3.72063	3.89775	3.96394	3.38564	3.89847	4.04538	3.78384	3.98842	3.39169	3.93853	3.53201
ID200	3.62803	3.77003	3.8586	3.35416	3.68659	3.91691	4.03814	3.43458	3.83171	4.02515	3.74311	4.01611	3.35794	3.98104	3.52931
ID201	3.77551	3.84474	4.02793	3.49558	3.7834	4.04857	4.21577	3.57123	4.13535	4.20771	3.95169	4.17824	3.60008	4.07609	3.71709
ID202	3.56061	3.88569	3.82027	3.36755	3.75963	3.86828	3.99225	3.53866	3.89276	3.95074	3.77007	3.99524	3.38887	3.96936	3.43181
ID203	3.6974	3.61417	4.05755	3.47046	3.74005	3.97216	4.05541	3.30422	3.99356	4.08405	3.87057	4.08185	3.46683	4.05744	3.53951
ID204	3.74294	3.89353	3.95205	3.45953	3.79681	3.95383	4.14028	3.56854	3.96765	4.09034	3.90879	4.07966	3.37856	4.04018	3.67914
ID205	3.721	3.68044	3.88977	3.50031	3.77472	3.92279	3.96748	3.50533	3.95664	4.04892	3.89121	3.98677	3.52725	3.92844	3.54947
ID206	3.80597	3.79207	3.89159	3.46583	3.63294	3.90028	4.03169	3.63369	3.9182	4.04543	3.85211	4.01072	3.46285	3.87528	3.66516
ID207	3.3067	3.74728	3.58793	3.1425	3.39071	3.53994	3.66932	3.46182	3.65889	3.6544	3.52045	3.67343	3.21455	3.60788	3.21489
ID208	3.62835	3.69659	3.82385	3.2455	3.74924	3.80548	3.89739	3.47778	3.95584	3.95954	3.76475	4.02799	3.35808	3.95448	3.33893
ID209	3.49138	3.58443	3.69308	3.20237	3.46921	3.61927	3.80115	3.24633	3.64758	3.77138	3.54345	3.9082	3.21645	3.8604	3.33892
ID210	3.35046	3.49771	3.56447	3.09104	3.34051	3.52299	3.68275	3.2053	3.65873	3.71398	3.52916	3.73855	3.07132	3.61515	3.17045
ID211	3.27997	3.72966	3.65935	3.15831	3.58253	3.62398	3.73457	3.43505	3.70121	3.75594	3.58735	3.77517	3.15455	3.76229	3.19549
ID212	3.68708	3.74361	4.01042	3.52827	3.70805	4.00514	4.15171	3.50652	4.1189	4.18596	3.93939	4.1298	3.59199	4.0705	3.63616
ID213	3.75955	3.80697	3.96778	3.47133	3.80821	3.97295	4.07231	3.52801	3.9547	4.09816	3.81745	4.14328	3.50721	4.04422	3.56729
ID214	3.71338	3.83093	3.94811	3.4989	3.82329	3.99254	4.08012	3.58808	4.00786	4.12598	3.88939	4.11594	3.45725	4.05558	3.56578
ID215	3.73591	3.78924	3.91617	3.34874	3.76277	3.92482	3.98669	3.32511	3.91309	4.01294	3.68732	4.03245	3.50733	3.99196	3.46327
ID216	3.552	3.66356	3.83324	3.39633	3.65328	3.84313	3.98348	3.31163	3.79964	3.94779	3.69058	4.0117	3.45528	3.92443	3.41131
ID217	3.45461	3.64144	3.70839	3.16607	3.52755	3.65125	3.82617	3.3641	3.81768	3.79015	3.57561	3.8547	3.20822	3.75581	3.31874
ID218	3.76998	3.70902	3.95178	3.31814	3.6617	3.94892	4.07067	3.26055	3.96673	4.07917	3.81962	4.03541	3.32489	3.96593	3.58625
ID219	3.19979	3.6453	3.51597	3.03088	3.27144	3.53224	3.59261	3.41255	3.54218	3.63201	3.40124	3.63	2.99115	3.54268	3.1304
ID220	3.55009	3.79244	3.84362	3.35385	3.66669	3.81299	3.82408	3.47327	3.95505	3.94964	3.8286	3.9355	3.35368	3.88816	3.44378
ID221	3.54074	3.82219	3.83612	3.33241	3.64402	3.80974	3.92048	3.45765	3.83846	3.91719	3.71786	3.93813	3.52232	3.94564	3.46611
ID222	3.31126	3.78977	3.64532	3.14528	3.52089	3.61768	3.71431	3.39321	3.71413	3.7585	3.61898	3.84935	3.12785	3.79544	3.19416
ID223	3.49159	3.53248	3.68424	3.20795	3.57729	3.67883	3.79952	3.20323	3.7041	3.78426	3.7176	3.72781	3.15342	3.77646	3.33833
ID224	3.75948	3.65689	3.92292	3.21676	3.93159	3.99327	3.95624	3.52984	4.02343	4.08324	3.85032	4.13803	3.27956	4.06642	3.41762
ID225	3.55301	3.7435	3.90926	3.37684	3.67342	3.88577	4.03321	3.46157	3.98965	4.04532	3.83253	4.02384	3.34614	3.99577	3.48284
ID226	3.91442	3.73784	4.05927	3.50242	3.72613	4.02608	4.174	3.428	4.08924	4.17621	3.93011	4.14264	3.52618	4.1441	3.74495
ID227	3.42983	3.5902	3.66933	3.18255	3.483	3.66238	3.74184	3.38208	3.66776	3.77224	3.61183	3.75442	3.26412	3.73065	3.26936
ID228	3.71236	3.7434	3.86641	3.22588	3.689	3.89163	4.04699	3.52447	3.89761	4.01116	3.78316	4.0489	3.22405	3.9198	3.54826
ID229	3.47741	3.61679	3.68766	3.16415	3.49308	3.76168	3.79571	3.38816	3.76485	3.83807	3.57904	3.81144	3.15894	3.74207	3.32808
ID230	3.38638	3.58669	3.65439	3.09968	3.55952	3.68892	3.77362	3.21997	3.68318	3.75458	3.56896	3.85337	3.19598	3.81905	3.12737
ID231	3.59651	3.58743	3.87696	3.20228	3.6628	3.9411	3.93873	3.38439	3.89436	4.005	3.72792	4.00415	3.17004	3.99978	3.40451
ID232	3.70119	3.73099	3.94568	3.53824	3.64913	3.87233	4.04821	3.41016	3.93124	4.07083	3.79512	4.08556	3.50917	4.00728	3.61817
ID233	3.44374	3.52614	3.64238	3.28669	3.41398	3.66668	3.72558	3.40875	3.73051	3.80989	3.53791	3.79712	3.17039	3.64586	3.32064
ID234	3.66323	3.88859	3.86402	3.42476	3.71974	3.87168	3.99459	3.66985	3.85019	4.00468	3.75957	4.04278	3.40533	3.9514	3.53199
ID235	3.55103	3.82412	3.84659	3.25408	3.77129	3.83334	3.88505	3.50108	3.87652	3.93629	3.76616	4.03794	3.33614	3.98969	3.31131
ID236	3.79311	3.73384	4.01642	3.46318	3.78082	4.03898	4.19309	3.50611	4.10756	4.16579	3.96691	4.18674	3.58495	4.14399	3.72403
ID237	3.62987	3.64051	3.85152	3.40939	3.70825	3.88452	3.91359	3.3966	3.8542	3.96962	3.71816	3.96828	3.43426	3.89292	3.42676
ID238	3.69084	3.923	4.01427	3.48741	3.82226	4.01668	4.07983	3.6568	4.04346	4.14424	3.89159	4.14329	3.50676	4.11577	3.62018
ID239	3.67031	3.77137	3.89291	3.41398	3.64187	3.89866	4.10852	3.4689	3.94214	3.97744	3.77085	4.0445	3.36948	4.04324	3.5589
ID240	3.33809	3.65117	3.63323	3.12017	3.52626	3.69817	3.7889	3.32713	3.69449	3.7839	3.55793	3.82606	3.03755	3.83731	3.16409
ID241	3.44168	3.59682	3.65641	3.24486	3.56972	3.62657	3.88305	3.28254	3.81477	3.87039	3.65168	3.88922	3.33796	3.86627	3.22689
ID242	3.64729	3.95272	4.04485	3.45456	3.95806	4.01685	4.12088	3.69064	4.15059	4.18902	3.99395	4.20641	3.63033	4.15557	3.56946
ID243	3.7784	3.96859	3.95166	3.43496	3.83749	4.00433	4.11505	3.66872	4.05545	4.13335	3.91198	4.07297	3.41975	4.04866	3.66661
ID244	3.60787	3.77208	3.86227	3.34474	3.58468	3.87488	3.98192	3.55165	4.02005	4.02101	3.85475	3.94753	3.32053	3.90776	3.57399
ID245	3.53347	3.7167	3.8675	3.3461	3.60984	3.77351	3.94253	3.32134	3.86656	3.94153	3.73114	3.94278	3.45747	3.85015	3.38707
ID246	3.64006	3.7814	3.84673	3.40545	3.5979	3.84526	4.00172	3.4563	3.89732	3.99393	3.72971	4.01889	3.30793	3.97969	3.50574
ID247	3.59911	3.87063	3.89625	3.41627	3.63785	3.84372	4.03596	3.61297	3.92114	4.01673	3.71935	4.01984	3.41738	3.92639	3.5299
ID248	4.11177	4.23878	NA	3.8041	NA	4.36704	4.47941	3.78807	NA	4.55661	4.25071	4.51843	NA	4.40378	4.05071
ID249	3.80418	3.71099	3.96082	3.4007	3.73192	3.97768	4.06827	3.56595	3.92651	4.10599	3.83231	4.09879	3.44678	4.00872	3.58986
ID250	3.78402	3.87231	4.03482	3.50701	3.76621	4.0159	4.1998	3.62264	4.11438	4.17227	3.95568	4.13776	3.55286	4.04117	3.68141
ID251	3.47902	3.68018	3.856	3.32276	3.71839	3.78218	3.93023	3.24926	3.78075	3.88783	3.59058	3.99289	3.45209	3.98448	3.26065
ID252	3.53766	3.78056	3.84532	3.23347	3.64088	3.8341	4.02223	3.43427	3.89183	3.97204	3.73652	3.99652	3.40167	3.89281	3.49199
ID253	3.43078	3.58959	3.69227	3.19259	3.36333	3.64428	3.82816	3.25611	3.65353	3.72187	3.51061	3.79884	3.26181	3.82447	3.27641
ID254	3.60486	3.73258	3.80357	3.26434	3.57908	3.78528	3.8113	3.48298	3.81107	3.96094	3.73507	3.89583	3.29595	3.81422	3.41966
ID255	3.5881	3.74301	3.84596	3.33001	3.74075	3.90349	4.01339	3.44924	3.90753	3.97232	3.75394	4.02175	3.36697	3.99895	3.41184
ID256	3.60945	3.90558	3.92221	3.30964	3.81169	3.89221	3.94053	3.38883	3.80012	3.99073	3.72646	3.99423	3.36613	4.03798	3.37143
ID257	3.62787	3.66066	3.87419	3.41095	3.72717	3.86896	4.00363	3.34483	3.96645	4.02925	3.78874	4.02874	3.384	3.93686	3.45916
ID258	3.65549	3.79549	3.92272	3.46219	3.81702	3.90576	4.07195	3.41376	3.90522	4.0448	3.82674	4.06142	3.50542	4.03066	3.49004
ID259	3.78618	3.7787	3.99371	3.51985	3.7469	3.95326	4.11107	3.43625	4.03898	4.08511	3.88065	4.07977	3.60834	4.06293	3.63198
ID260	3.73373	3.75388	3.81796	3.35738	3.69326	3.77784	3.96779	3.38943	3.84504	3.96251	3.76524	3.91585	3.31938	3.86289	3.53025
ID261	3.57156	3.7948	3.84254	3.30171	3.65835	3.81632	3.87331	3.52005	3.85735	3.93888	3.72698	3.91284	3.37804	3.81535	3.4312
ID262	3.52064	3.70748	3.77071	3.35963	3.62631	3.7945	3.79623	3.41442	3.73672	3.92383	3.65156	3.86544	3.31634	3.80798	3.43508
ID263	3.66997	3.69744	3.98753	3.52927	3.75816	3.92433	3.99562	3.45579	3.98173	4.07642	3.8633	4.06842	3.58951	4.03683	3.4948
ID264	3.73833	3.83508	4.01192	3.44268	3.74699	3.98892	4.05252	3.44492	3.9729	4.10721	3.81843	4.15491	3.59096	4.04218	3.58329
ID265	3.6513	3.7854	3.89053	3.4989	3.76271	3.88332	4.05097	3.42006	3.96338	4.04159	3.81611	4.03905	3.47339	3.9409	3.54473
ID266	3.58874	3.85658	3.89418	3.38906	3.78741	3.85413	3.98502	3.52664	3.98422	3.98247	3.83681	4.05483	3.42654	4.01064	3.4142
ID267	3.53998	3.71699	3.77837	3.33204	3.48055	3.73998	3.88245	3.52573	3.76	3.87094	3.6242	3.89154	3.39163	3.78259	3.44346
ID268	3.84489	3.42059	3.97611	3.33438	3.8364	3.94547	3.9742	3.32091	4.09288	4.06511	3.92793	4.13342	3.58585	4.00072	3.45816
ID269	3.74868	3.7623	3.90625	3.47079	3.7184	3.88566	3.99839	3.32672	3.97271	4.02472	3.76465	3.94423	3.53003	3.89004	3.55637
ID270	3.65579	3.774	3.83441	3.21914	3.72837	3.86011	3.92373	3.51261	3.92145	3.94907	3.7767	3.98474	3.28004	3.92678	3.40784
ID271	3.55687	3.73436	3.72014	3.12778	3.66276	3.75451	3.83239	3.47689	3.90263	3.91389	3.71918	3.98731	3.21756	3.8893	3.25816
ID272	3.31619	3.56846	3.6067	3.12215	3.49323	3.53738	3.69526	3.22547	3.59776	3.72884	3.51021	3.79221	3.12416	3.72854	3.15146
ID273	3.47019	3.63379	3.70338	3.12052	3.54434	3.7512	3.83144	3.3854	3.74414	3.82135	3.60012	3.8536	3.06688	3.83561	3.29608
ID274	3.88791	3.7149	3.96097	3.17688	3.86748	3.96432	4.11283	3.5334	4.04649	4.04636	3.87886	4.22082	3.57144	4.07866	3.51427
ID275	3.77374	3.61878	3.9418	3.35663	3.8001	3.96742	3.99467	3.37716	3.93469	4.08211	3.80019	4.04007	3.30259	4.01772	3.50514
ID276	3.45809	3.55154	3.67741	3.1454	3.45875	3.66877	3.80304	3.24348	3.65061	3.83667	3.53845	3.83422	3.1582	3.72956	3.30014
ID277	3.4442	3.50414	3.63509	2.95592	3.43764	3.55635	3.80289	3.21343	3.71848	3.67934	3.54118	3.84294	3.14274	3.7367	3.07897
ID278	3.58625	3.703	3.86182	3.27067	3.73518	3.8781	4.00793	3.47943	3.92131	3.96437	3.78239	4.03005	3.31173	3.96059	3.36064
ID279	3.53235	3.69532	3.82528	3.33157	3.73311	3.82339	3.92687	3.35993	3.8369	3.94096	3.72962	3.99661	3.3764	3.96675	3.31676
ID280	3.6381	3.67431	3.89486	3.37939	3.74129	3.91562	4.00569	3.37209	3.9029	4.01658	3.76022	4.04181	3.36309	4.00339	3.43022
ID281	3.52298	3.73855	3.80498	3.21228	3.76582	3.74451	3.8304	3.34608	3.78905	3.9543	3.67093	4.05133	3.32244	3.88414	3.26745
ID282	3.49924	3.49288	3.69634	3.00703	3.53003	3.74699	3.79252	3.33715	3.81482	3.8261	3.64692	3.86256	3.01254	3.83242	3.27084
ID283	3.49155	3.74516	3.73583	3.32391	3.65344	3.73391	3.74702	3.46171	3.73791	3.86954	3.61953	3.85405	3.35027	3.80329	3.29903
ID284	3.74456	3.77743	3.8536	3.38295	3.59936	3.92047	3.99727	3.45887	3.9066	4.06973	3.81798	3.98705	3.24051	3.90194	3.63346
ID285	3.5546	3.66944	3.87571	3.33088	3.70047	3.80915	3.92284	3.38001	3.90088	3.95633	3.7422	4.02194	3.39551	3.9178	3.34433
ID286	3.49197	3.73161	3.75208	3.35122	3.60718	3.73532	3.8631	3.46699	3.85412	3.88564	3.71258	3.84424	3.3468	3.82504	3.36764
ID287	3.74698	3.76616	3.97717	3.35213	3.87251	4.02452	4.00988	3.56591	4.08909	4.10061	3.93717	4.14701	3.47384	4.06482	3.48256
ID288	3.5846	3.62161	3.77364	3.14126	3.58896	3.79919	3.92017	3.32578	3.86044	3.88324	3.68557	3.88448	3.10973	3.84651	3.37338
ID289	3.6686	3.70214	3.76335	3.31233	3.63121	3.80869	3.9001	3.48576	3.89941	3.9416	3.73513	3.86736	3.24698	3.83511	3.49291
ID290	3.63246	3.76006	3.89279	3.3498	3.55457	3.88271	4.07501	3.40897	3.90491	4.0595	3.74893	4.02861	3.25161	4.00256	3.57149
ID291	3.37401	3.47436	3.54983	2.934	3.41959	3.53314	3.75111	3.14818	3.59345	3.66418	3.43101	3.76263	3.02522	3.71779	3.07988
ID292	3.37079	3.37027	3.65929	3.02183	3.41026	3.56962	3.651	3.13585	3.68182	3.71843	3.51454	3.78935	3.19733	3.58647	3.12962
ID293	3.70893	3.68202	3.95349	3.34001	3.66516	3.978	4.07633	3.38431	3.91443	4.10949	3.8158	4.05336	3.40089	4.00931	3.60482
ID294	3.66536	3.62265	3.87402	3.41172	3.76148	3.89029	3.9391	3.29911	3.87527	4.03579	3.76554	3.97842	3.30151	3.93654	3.51324
ID295	3.67164	3.79914	3.91206	3.43962	3.72121	3.91488	4.03236	3.4081	3.93516	4.04202	3.80474	4.01658	3.39686	3.98485	3.56875
ID296	3.47245	3.67882	3.66405	3.27749	3.42198	3.66361	3.80632	3.36775	3.71974	3.79756	3.54782	3.80436	3.16459	3.73547	3.34557
ID297	3.60016	3.69193	3.91039	3.3364	3.68794	3.88562	4.0206	3.43659	3.95871	4.06691	3.81353	4.01968	3.32376	3.9675	3.46729
ID298	3.70705	3.65638	3.94349	3.41819	3.66308	3.89623	3.99097	3.46144	3.93601	4.03216	3.79334	4.03076	3.53553	3.98582	3.52717
ID299	3.64564	3.73755	3.9153	3.45474	3.67733	3.87574	3.99379	3.48612	3.93834	4.04565	3.76996	4.01362	3.48434	3.95479	3.48624
ID300	3.48305	3.59951	3.72114	3.28892	3.54942	3.64031	3.82962	3.25433	3.79058	3.84379	3.64578	3.77096	3.28384	3.73285	3.37004
ID301	3.63456	3.60876	3.80316	3.24811	3.53631	3.82763	3.93392	3.40749	3.872	3.92931	3.76507	3.91743	3.28907	3.87843	3.44317
ID302	3.6519	3.77634	3.85002	3.36811	3.76783	3.79643	3.91273	3.27915	3.78461	3.91506	3.70099	4.00702	3.49951	3.93933	3.42423
ID303	3.68658	3.72513	3.93258	3.40261	3.70251	3.94438	4.01918	3.41557	3.93868	4.08323	3.81246	4.0567	3.38828	3.96933	3.51617
ID304	3.70008	3.84756	3.94536	3.45394	3.77042	3.91522	4.01121	3.55657	3.95676	4.06142	3.82025	4.10176	3.52453	3.99557	3.53141
ID305	3.78495	3.69945	4.02429	3.48906	3.87527	4.02696	4.12002	3.47653	4.0194	4.10736	3.88866	4.13877	3.5503	4.1754	3.60204
ID306	3.58033	3.59959	3.7865	3.16149	3.47885	3.74453	3.89951	3.2635	3.90891	3.87048	3.71598	3.91309	3.13573	3.88139	3.36249
ID307	3.45102	3.83167	3.84161	3.32378	3.68792	3.84977	3.94187	3.56383	3.86083	3.9451	3.6911	4.01873	3.2707	3.9848	3.30868
ID308	3.68144	3.77649	3.91931	3.37516	3.77299	3.92114	4.0201	3.37668	3.986	4.07767	3.85341	4.04498	3.38278	4.00354	3.47963
ID309	3.67633	3.76509	3.96779	3.40902	3.7398	3.9705	4.06569	3.46471	3.94084	4.06583	3.85467	4.09831	3.51209	4.02865	3.48996
ID310	3.51932	3.68571	3.66695	3.25135	3.60435	3.71195	3.83407	3.38435	3.73321	3.82146	3.60446	3.87598	3.24797	3.76236	3.35409
ID311	3.61661	3.85328	3.89114	3.43544	3.60577	3.8727	3.9888	3.55622	3.91139	4.02948	3.77333	4.01014	3.44671	3.96792	3.54243
ID312	3.57289	3.65778	3.80079	3.25079	3.6609	3.78135	3.94405	3.30382	3.88627	3.98075	3.66344	4.00848	3.38147	3.91938	3.41476
ID313	3.75703	3.74936	3.88362	3.4893	3.78792	3.93245	4.00067	3.45227	3.9043	4.04994	3.80522	4.04228	3.44365	3.99456	3.61634
ID314	3.48053	3.83051	3.73785	3.1639	3.61004	3.786	3.84239	3.5769	3.83943	3.85967	3.6754	3.89347	3.25924	3.89799	3.39375
ID315	3.81359	3.89054	4.03446	3.64384	3.856	3.97485	4.0643	3.56456	4.00957	4.10561	3.86932	4.12869	3.72001	4.02819	3.66596
ID316	3.72053	3.77007	3.79237	3.55525	3.66584	3.96359	3.94852	3.4073	3.99578	4.0811	3.84015	4.03787	3.58544	4.026	3.56427
ID317	3.55117	3.82738	3.77712	3.32808	3.71354	3.80141	3.93456	3.5448	3.91479	3.9551	3.79942	3.89345	3.27088	3.91059	3.41132
ID318	3.70824	3.75013	3.79936	3.32312	3.70323	3.84485	3.95756	3.39046	3.84846	3.94885	3.7126	3.9668	3.34597	3.88058	3.49192
ID319	3.59426	3.74203	3.74898	3.40306	3.63689	3.76798	3.87621	3.41767	3.84476	3.91876	3.70742	3.83755	3.37384	3.79752	3.47206
ID320	3.36167	3.49537	3.64735	3.09483	3.50233	3.63273	3.77402	3.21091	3.70317	3.75138	3.54474	3.82239	3.21845	3.76699	3.11793
ID321	3.39152	3.7871	3.66647	3.20216	3.49227	3.66925	3.82689	3.4868	3.72614	3.81469	3.56533	3.83281	3.15245	3.76559	3.26147
ID322	3.50644	3.54025	3.88798	3.30336	3.68724	3.85712	3.96947	3.22401	3.80683	3.97253	3.70206	4.02165	3.3362	3.95469	3.34018
ID323	3.49424	3.72967	3.83068	3.3146	3.7465	3.81844	3.92075	3.3522	3.87202	3.9451	3.75849	3.99514	3.38247	3.98559	3.28374
ID324	3.61799	3.69753	3.84256	3.33761	3.53817	3.79178	3.91572	3.3747	3.79644	3.84613	3.65571	3.95707	3.46245	3.91902	3.40133
ID325	3.53768	3.60665	3.80264	3.30719	3.61871	3.80306	3.91396	3.14629	3.79425	3.95583	3.61216	3.95583	3.26748	3.91429	3.39613
ID326	3.37058	3.62945	3.65177	3.12151	3.46084	3.63447	3.71442	3.30195	3.73299	3.73594	3.60107	3.75985	3.20817	3.70617	3.12321
ID327	3.74596	3.82991	3.96699	3.46297	3.69326	3.88436	4.01886	3.52387	3.94333	4.06545	3.75556	4.07897	3.51433	3.83759	3.5951
ID328	3.45228	3.70722	3.80183	3.30801	3.65273	3.76488	3.86162	3.36865	3.81769	3.87373	3.71928	3.89041	3.34731	3.88182	3.31569
ID329	3.81958	3.76269	3.96	3.47879	3.74857	3.8771	4.0163	3.38986	3.94457	4.05604	3.77253	4.08717	3.53152	3.98405	3.57401
ID330	3.68575	3.61455	3.90501	3.39293	3.61374	3.87485	3.99956	3.28641	3.92201	3.97924	3.75001	4.01041	3.37798	3.99979	3.52467
ID331	3.83236	3.68298	3.92633	3.43014	3.69606	3.95368	4.0865	3.36689	3.9725	4.08467	3.80646	4.08371	3.36376	3.98048	3.67146
ID332	3.63836	3.87696	3.98728	3.50768	3.81037	3.99754	4.08014	3.55406	4.0002	4.1177	3.90088	4.07373	3.55304	4.0718	3.59626
ID333	3.69971	3.67049	3.9183	3.43753	3.81502	3.92083	4.03088	3.45165	3.97857	4.06422	3.80493	4.08147	3.42891	3.98139	3.50353
ID334	3.18514	3.58181	3.3815	2.87518	3.35421	3.40661	3.48662	3.35628	3.48529	3.49532	3.32882	3.55167	2.86799	3.479	3.0388
ID335	3.75641	3.77007	3.98677	3.50881	3.82248	4.0285	4.14842	3.48611	4.05722	4.15095	3.90966	4.13846	3.41307	4.04084	3.64801
ID336	3.61684	3.78034	3.91083	3.30498	3.70555	3.90406	3.97994	3.54974	3.9124	4.00876	3.7601	4.06196	3.37463	3.97978	3.46205
ID337	3.68141	3.77449	3.88928	3.45844	3.67374	3.87863	4.02041	3.58753	3.90307	4.01227	3.80273	3.99422	3.50387	3.99748	3.53203
ID338	3.62992	3.82641	3.89692	3.3974	3.58709	3.90075	3.97997	3.42571	3.88969	4.03429	3.77734	3.98002	3.40592	3.94024	3.49094
ID339	3.56577	3.78974	3.89023	3.36715	3.63171	3.77403	3.91424	3.57558	3.87239	3.92219	3.67198	4.00372	3.56521	3.88507	3.37327
ID340	3.62381	3.92027	3.95739	3.5342	3.81121	3.88576	4.09372	3.65479	3.936	4.10456	3.82041	4.1069	3.59459	3.96153	3.59108
ID341	3.6639	3.58809	3.83508	2.95744	3.74762	3.8702	3.91807	3.42199	3.8562	3.88094	3.71985	4.02082	3.16062	3.99721	3.22139
ID342	3.19241	3.62132	3.46198	2.94113	3.41982	3.45793	3.53956	3.22974	3.49562	3.61736	3.3677	3.62016	2.85472	3.55972	3.07728
ID343	3.52181	3.7666	3.82328	3.37141	3.67848	3.77841	3.92458	3.41517	3.85327	3.95656	3.72806	3.95131	3.43516	3.88328	3.38907
ID344	3.47281	3.48523	3.72661	3.12904	3.50393	3.72785	3.74794	3.26549	3.78266	3.82743	3.60691	3.81041	3.24122	3.7382	3.24584
ID345	3.65077	3.76939	3.81962	3.24648	3.62052	3.82942	3.99193	3.44846	3.94828	3.93898	3.80902	3.93784	3.31025	3.91671	3.46138
ID346	3.64891	3.76429	3.83895	3.38195	3.59586	3.86664	3.93531	3.6946	3.89807	4.00083	3.75789	3.96275	3.32183	3.82079	3.54136
ID347	3.41078	3.55032	3.65523	3.19421	3.55349	3.64706	3.74372	3.31966	3.74513	3.7882	3.55327	3.80591	3.23772	3.73108	3.2279
ID348	3.71488	3.74519	3.91719	3.43035	3.71748	3.87602	4.05451	3.39838	3.89588	3.97785	3.7647	4.01229	3.55626	4.03364	3.55313
ID349	3.3667	3.82836	3.71037	3.22422	3.64883	3.67915	3.87967	3.52881	3.75914	3.82011	3.62826	3.92333	3.25859	3.99263	3.17683
ID350	3.42614	3.58919	3.60976	3.13209	3.45389	3.5381	3.74179	3.27609	3.59783	3.72401	3.47179	3.82725	3.2097	3.67179	3.15754
ID351	3.64671	3.71877	3.8572	3.39964	3.66639	3.84853	3.96577	3.43087	3.88141	3.96347	3.75728	3.9682	3.35486	3.93276	3.53789
ID352	3.71401	3.84661	3.95254	3.44663	3.60596	3.85294	4.04325	3.58192	3.95942	3.98343	3.80606	4.05784	3.56276	4.00939	3.55516
ID353	3.48512	3.48395	3.73045	3.19788	3.55089	3.65605	3.76325	3.17205	3.75108	3.7795	3.60753	3.79359	3.38332	3.69608	3.22738
ID354	3.55116	3.70711	3.82891	3.3238	3.82999	3.809	3.99207	3.42536	3.89505	3.96143	3.78177	4.07391	3.37239	4.01484	3.3144
ID355	3.56439	3.55262	3.76082	3.11475	3.59981	3.73185	3.81652	3.30447	3.84359	3.85156	3.72787	3.9158	3.23718	3.85603	3.23262
ID356	3.45916	3.64405	3.77141	3.09093	3.61209	3.73769	3.78002	3.3798	3.82466	3.84841	3.63744	3.91206	3.22213	3.86644	3.23816
ID357	3.29981	3.73465	3.62377	3.25407	3.58462	3.60485	3.77672	3.38327	3.67459	3.74375	3.58256	3.7523	3.25837	3.71471	3.20469
ID358	3.67698	3.65055	3.86707	3.37888	3.69541	3.84843	3.95311	3.34833	3.89854	3.98962	3.73803	3.99905	3.3978	3.90447	3.47811
ID359	3.61102	3.8062	3.91075	3.38064	3.64527	3.92924	4.00427	3.547	4.06601	4.06111	3.90445	3.99908	3.38709	3.96824	3.59863
ID360	3.68369	3.8772	3.93152	3.49407	3.79051	3.93967	4.03487	3.56464	3.90443	4.02468	3.8114	4.03967	3.51755	4.05142	3.53831
ID361	3.49638	3.69727	3.80859	3.35325	3.72069	3.83647	3.90467	3.38801	3.87589	3.90575	3.77808	3.92266	3.31868	3.9374	3.40773
ID362	3.56198	3.66089	3.85487	3.39516	3.6383	3.85198	3.90315	3.29406	3.87862	3.97463	3.79652	3.94225	3.46538	3.92343	3.4073
ID363	3.51867	3.8828	3.66244	3.24811	3.44259	3.69014	3.81232	3.76308	3.72189	3.79449	3.57103	3.80761	3.24203	3.79487	3.36331

## Sheet: TwinsUK_AdiposeSubcutaneous
	MTND6	MTRNR2	MTATP6	MTND4L	MTND3	MTCYB	MTCO1	MTRNR1	MTND1	MTND4	MTND2	MTCO2	MTATP8	MTCO3	MTND5
ID1	4.32844	4.335	4.5175	4.05727	4.41419	4.50381	4.47416	3.63327	4.63046	4.59032	4.47523	4.46977	4.15971	4.66298	4.12908
ID2	4.40224	4.48821	4.63161	4.11919	4.55976	4.64942	4.54204	3.86988	4.70366	4.72731	4.67385	4.57889	4.26047	4.73947	4.21009
ID3	4.40916	4.40944	4.63067	4.08304	4.66672	4.57167	4.51443	3.69824	4.68404	4.70662	4.57263	4.63462	4.19272	4.72584	4.07659
ID4	4.39179	4.30303	4.55955	4.04071	4.40689	4.59074	4.52453	3.70645	4.65344	4.68045	4.565	4.56307	4.08398	4.5424	4.22731
ID5	4.34107	4.24864	4.61872	3.93044	4.52677	4.60011	4.5255	3.54468	4.7303	4.73006	4.6516	4.61326	4.05504	4.70359	4.07649
ID6	4.27324	4.23752	4.55652	3.66663	4.43211	4.52707	4.36144	3.60625	4.61851	4.61045	4.49508	4.59711	3.86269	4.74959	3.83116
ID7	4.1273	4.13548	4.37373	3.83121	4.19061	4.4007	4.29214	3.49183	4.57767	4.52416	4.47726	4.37646	3.79961	4.53436	3.92554
ID8	4.37218	4.329	4.59019	3.83869	4.50694	4.61596	4.48697	3.52147	4.6807	4.67174	4.53364	4.52676	4.17928	4.72681	4.06179
ID9	4.15648	4.17784	4.44189	3.9718	4.29642	4.4295	4.4724	3.50847	4.53321	4.56087	4.40057	4.42072	3.95416	4.59251	4.02462
ID10	4.17386	4.29456	4.44623	4.04074	4.24224	4.4802	4.43461	3.55112	4.50571	4.58484	4.42365	4.43815	3.8809	4.53169	4.11053
ID11	4.25334	4.43655	4.56213	4.1817	4.35314	4.55875	4.59935	3.68355	4.60413	4.66641	4.46233	4.55014	4.20249	4.64013	4.1566
ID12	4.34812	4.44876	4.56964	3.95572	4.4812	4.7093	4.61505	3.73205	4.80145	4.70328	4.65039	4.65621	4.09618	4.83842	4.24097
ID13	4.33164	4.18877	4.54456	4.14476	4.44986	4.63982	4.54377	3.59828	4.67092	4.70762	4.57195	4.54425	4.09779	4.6963	4.24736
ID14	4.39013	4.3055	4.62577	4.16837	4.47062	4.66763	4.67937	3.69546	4.59956	4.7799	4.53792	4.58384	4.08774	4.73821	4.26878
ID15	4.36449	4.27734	4.68946	4.05026	4.53591	4.66295	4.55633	3.58678	4.62362	4.74804	4.59088	4.67744	4.25085	4.70307	4.02974
ID16	4.34314	4.34491	4.50641	4.02125	4.40432	4.53705	4.46894	3.65602	4.5728	4.62521	4.5157	4.46535	4.06326	4.57717	4.16112
ID17	4.32504	4.26748	4.56147	4.03421	4.38948	4.61803	4.5116	3.62963	4.72577	4.68701	4.57108	4.519	4.14423	4.7009	4.20972
ID18	4.33247	4.30512	4.51491	3.9715	4.37265	4.56775	4.53274	3.65931	4.60922	4.64918	4.55269	4.46432	3.95639	4.65062	4.16129
ID19	4.34671	4.27469	4.66134	4.24509	4.52966	4.68825	4.4912	3.46857	4.71217	4.82015	4.66383	4.57362	4.33309	4.72245	4.2691
ID20	4.27414	4.26028	4.59102	3.97775	4.46358	4.61962	4.50275	3.44771	4.68904	4.72688	4.50087	4.58789	4.07654	4.70595	4.06913
ID21	4.19066	4.27293	4.36076	3.60307	4.34538	4.48905	4.33568	3.71416	4.51956	4.60919	4.5123	4.38879	NA	4.54135	3.89015
ID22	4.3317	4.29753	4.56412	3.96717	4.57216	4.54117	4.49494	3.71751	4.61084	4.61068	4.53339	4.59214	4.18494	4.63404	3.96043
ID23	4.37697	4.24106	4.61659	3.81702	4.5329	4.53489	4.50561	3.74886	4.6917	4.6487	4.56423	4.66695	4.06526	4.7466	4.02069
ID24	4.2637	4.2662	4.44818	3.84104	4.31172	4.51626	4.48125	3.65212	4.59401	4.58162	4.46084	4.46023	3.76758	4.67036	4.04158
ID25	4.44602	4.40913	4.6957	4.27753	4.4592	4.70562	4.64235	3.63601	4.73064	4.8368	4.63616	4.57747	4.35667	4.74359	4.35362
ID26	4.24655	4.28498	4.56019	4.09678	4.39252	4.57892	4.57678	3.57637	4.68869	4.69493	4.55462	4.54681	4.1721	4.72444	4.1615
ID27	4.32173	4.34093	4.65087	4.14005	4.44125	4.67807	4.58727	3.62257	4.7458	4.78497	4.59585	4.63076	4.08003	4.76313	4.21574
ID28	4.3745	4.55642	4.63816	4.31039	4.52189	4.64638	4.58861	NA	4.63092	4.73486	4.55448	4.54435	4.34639	4.6544	4.2195
ID29	4.28757	4.29013	4.5608	4.16765	4.46005	4.62965	4.57156	3.46675	4.61497	4.7123	4.43995	4.57892	4.08469	4.68244	4.21557
ID30	4.31946	4.41141	4.61913	4.11858	4.43372	4.67752	4.56292	3.64637	4.71588	4.74649	4.61394	4.57696	4.09974	4.71805	4.28497
ID31	4.26989	4.30459	4.51549	3.96505	4.43984	4.47834	4.47079	3.59244	4.56274	4.6272	4.48702	4.5564	4.06852	4.67342	3.93682
ID32	4.2557	4.22011	4.53318	4.07002	4.4802	4.60091	4.63752	3.58602	4.70901	4.74725	4.60066	4.60183	3.97374	4.7729	4.15183
ID33	4.31148	4.25892	4.52787	4.13225	4.316	4.52388	4.49529	3.48603	4.60978	4.63244	4.4722	4.50415	4.16996	4.60736	4.15506
ID34	4.3009	4.32304	4.57648	4.06541	4.35028	4.61217	4.46057	3.56109	4.66789	4.72614	4.58133	4.53646	4.11414	4.60385	4.22704
ID35	4.1935	4.28607	4.44895	3.65331	4.37474	4.48573	4.43255	3.68937	4.602	4.5752	4.4921	4.48763	3.73783	4.61818	3.87651
ID36	4.3774	4.2438	4.49039	4.07595	4.36931	4.57867	4.55005	3.55386	4.61736	4.66358	4.53295	4.52034	3.99455	4.65645	4.24753
ID37	4.31197	4.31387	4.52192	3.86469	4.42836	4.495	4.47192	3.62347	4.55661	4.59351	4.45654	4.62753	3.96749	4.69107	3.92407
ID38	4.3243	4.38266	4.60532	4.27179	4.37258	4.62737	4.61283	3.60751	4.6383	4.71268	4.55422	4.53788	4.29287	4.68686	4.25861
ID39	4.34306	4.47358	4.62524	4.27202	4.46828	4.64219	4.60025	3.68598	4.7593	4.7726	4.66675	4.56427	4.24582	4.71151	4.28446
ID40	4.34557	4.31297	4.65439	4.26226	4.57977	4.70042	4.64627	3.58245	4.73168	4.76322	4.77622	4.54608	4.20397	4.74049	4.26911
ID41	4.38741	4.36016	4.66451	4.19917	4.47488	4.72631	4.71387	3.55624	4.74066	4.85142	4.61764	4.63878	4.24427	4.77745	4.37232
ID42	4.36152	4.31262	4.63408	3.86657	4.54907	4.61443	4.48297	3.71461	4.66707	4.67747	4.57592	4.64259	4.11809	4.83212	3.93535
ID43	4.26113	4.3694	4.5929	4.15074	4.48403	4.72132	4.63741	3.70836	4.63111	4.77822	4.52834	4.53418	4.0161	4.75259	4.19137
ID44	4.23314	4.38216	4.48135	3.83624	4.37983	4.55377	4.49128	3.70682	4.60239	4.63034	4.53214	4.4736	3.8387	4.69654	4.0429
ID45	4.25375	4.24934	4.4781	4.01902	4.30072	4.53881	4.44813	3.61466	4.64476	4.62785	4.55683	4.52581	4.01643	4.70712	4.11252
ID46	4.24166	4.17345	4.5131	3.94789	4.33145	4.46917	4.35242	3.62912	4.63414	4.54662	4.54236	4.43009	3.95084	4.5597	4.06944
ID47	4.38783	4.28431	4.63075	4.02495	4.44955	4.62243	4.53657	3.50227	4.77666	4.74902	4.60136	4.59571	4.03629	4.71317	4.21867
ID48	4.29461	4.38281	4.60381	4.23479	4.37424	4.57416	4.5031	3.89339	4.69018	4.7014	4.56967	4.53145	4.22259	4.63559	4.21067
ID49	4.19428	4.1682	4.39549	4.03016	4.26467	4.4275	4.34881	3.42079	4.49553	4.49483	4.42598	4.39884	4.11895	4.50094	4.06864
ID50	4.19749	4.19421	4.45032	3.89219	4.21904	4.48845	4.5403	3.66727	4.61836	4.64327	4.49127	4.51733	3.75844	4.72806	4.0426
ID51	4.3196	4.42552	4.61025	4.26245	4.38327	4.62449	4.67447	3.67681	4.67824	4.72	4.50087	4.52139	4.32589	4.76015	4.26147
ID52	4.33474	4.4049	4.5813	4.23707	4.55434	4.5879	4.65126	3.73398	4.65155	4.70381	4.57609	4.52677	4.28102	4.71316	4.18004
ID53	4.24335	4.36202	4.52039	4.21785	4.30599	4.61938	4.53951	3.58392	4.71863	4.7237	4.60813	4.55746	4.11089	4.73646	4.24573
ID54	4.33751	4.38606	4.66994	4.13659	4.52747	4.70224	4.61118	3.76542	4.65175	4.77836	4.60685	4.60938	4.18896	4.73998	4.16333
ID55	4.25746	4.35255	4.50981	4.08968	4.34653	4.51442	4.53608	3.65083	4.63261	4.6162	4.51636	4.54834	4.10251	4.66514	4.13812
ID56	4.22242	4.265	4.44321	3.97016	4.43331	4.50749	4.43125	3.47067	4.6052	4.64088	4.45087	4.46707	3.89473	4.6153	4.03459
ID57	4.25848	4.40619	4.60064	4.21842	4.3753	4.58489	4.46697	4.00646	4.62364	4.70184	4.55869	4.52085	4.30024	4.62784	4.17159
ID58	4.28358	4.27956	4.49154	3.74043	4.43368	4.5323	4.43995	3.74522	4.68229	4.61767	4.5542	4.56534	3.94058	4.72124	3.99534
ID59	4.30931	4.28203	4.58635	4.14548	4.36291	4.66416	4.56113	3.42656	4.74355	4.78618	4.58749	4.58098	4.14518	4.6916	4.33824
ID60	4.21129	4.2301	4.49541	3.96599	4.27061	4.5065	4.47442	3.54492	4.57212	4.63215	4.45823	4.4672	3.99975	4.59572	4.12951
ID61	4.32989	4.37519	4.54151	4.02974	4.40053	4.59858	4.51622	3.73289	4.66244	4.66595	4.58557	4.57398	4.09894	4.73028	4.22517
ID62	4.22835	4.27638	4.45919	3.98612	4.29555	4.51614	4.50818	3.58244	4.65515	4.64705	4.5127	4.48167	3.82114	4.644	4.18168
ID63	3.98212	4.18796	4.35702	4.13686	4.30273	4.49832	4.51002	3.56976	4.63894	4.68841	4.49454	4.57479	3.98203	4.76305	3.99254
ID64	4.37349	4.40181	4.62975	4.20608	4.4087	4.7141	4.59198	3.64544	4.73365	4.81309	4.65644	4.60674	4.20481	4.75041	4.28405
ID65	4.20136	4.35155	4.45045	3.96725	4.2984	4.48182	4.49275	3.6432	4.6256	4.58155	4.46818	4.449	4.03991	4.67401	4.10556
ID66	4.3904	4.31691	4.66975	4.2398	4.4091	4.64568	4.66204	3.6217	4.6696	4.78296	4.56378	4.64345	4.18678	4.75436	4.29705
ID67	4.24053	4.29073	4.51808	4.12276	4.24993	4.51906	4.5043	3.52016	4.64486	4.65747	4.56651	4.53002	4.06054	4.66973	4.19389
ID68	4.41534	4.44165	4.61435	4.2057	4.42975	4.65066	4.60908	3.87265	4.68963	4.74098	4.5945	4.58348	4.18436	4.72099	4.29991
ID69	4.25808	4.33589	4.57998	4.05015	4.27528	4.60232	4.52154	3.68472	4.71035	4.65876	4.55299	4.50859	4.14334	4.79207	4.18522
ID70	4.29333	4.49716	4.57856	4.17603	4.38914	4.5907	4.54353	4.10581	4.61622	4.70614	4.51121	4.58849	4.11814	4.68117	4.17525
ID71	4.28734	4.21068	4.57045	3.94209	4.49559	4.6059	4.48938	3.58244	4.64088	4.68353	4.58259	4.57012	4.08094	4.69285	4.07831
ID72	4.33357	4.2904	4.57024	4.11546	4.46663	4.58231	4.47732	3.54003	4.67372	4.67461	4.59705	4.47805	4.17032	4.63077	4.16114
ID73	4.40061	4.31691	4.60366	4.00205	4.54393	4.63877	4.51857	3.63786	4.68629	4.71226	4.66528	4.56519	4.18565	4.71041	4.12589
ID74	4.24231	4.39212	4.60087	4.13041	4.40954	4.65449	4.59996	3.60041	4.76865	4.74953	4.60034	4.60004	4.26026	4.78396	4.28233
ID75	4.31516	4.42061	4.58917	4.19704	4.42893	4.54385	4.65881	3.6004	4.66435	4.72432	4.46412	4.53169	4.21505	4.75361	4.26334
ID76	4.32158	4.33906	4.6461	4.32961	4.56442	4.64716	4.61964	3.65981	4.69155	4.78149	4.54513	4.59083	4.3212	4.78627	4.19451
ID77	4.36921	4.43228	4.58154	4.081	4.46695	4.587	4.55751	3.76368	4.5841	4.63874	4.55356	4.60364	4.23063	4.71117	4.11119
ID78	4.35401	4.28243	4.60112	4.01676	4.42841	4.58468	4.50418	3.65838	4.66161	4.68402	4.56231	4.58361	4.16987	4.69946	4.04901
ID79	4.14749	4.39251	4.47931	3.9055	4.51986	4.52295	4.46027	3.70551	4.53547	4.57845	4.44728	4.56211	4.00651	4.73087	3.84588
ID80	4.33072	4.36811	4.51392	3.90709	4.46229	4.5981	4.49482	3.72242	4.68299	4.67602	4.5838	4.55454	3.96954	4.7138	4.10764
ID81	4.22131	4.30923	4.49316	4.05807	4.35339	4.5259	4.59335	3.60002	4.61321	4.64909	4.46523	4.4796	4.00104	4.59774	4.14648
ID82	4.29898	4.13595	4.58794	3.69007	4.55667	4.59657	4.48459	3.64121	4.64309	4.67317	4.58563	4.6415	3.85443	4.76857	3.90445
ID83	4.30986	4.15489	4.49693	3.77267	4.44789	4.54615	4.40662	3.60632	4.64612	4.614	4.55057	4.5329	3.81245	4.66782	4.00995
ID84	4.26752	4.27464	4.49553	4.11839	4.33295	4.54106	4.48091	3.52719	4.55099	4.61587	4.44192	4.46134	4.10471	4.60726	4.15422
ID85	4.36582	4.43384	4.57789	4.06072	4.43431	4.54522	4.56701	3.80925	4.60331	4.64241	4.50961	4.59895	4.19019	4.67331	4.09866
ID86	4.36977	4.4599	4.60631	3.95071	4.41007	4.63735	4.55703	3.73367	4.70642	4.70508	4.60782	4.54559	4.07703	4.69874	4.24991
ID87	4.27115	4.21507	4.502	3.96065	4.39546	4.49764	4.54093	3.42786	4.56601	4.6088	4.36056	4.44679	4.01088	4.68658	4.07131
ID88	4.48859	4.52312	4.60733	4.24585	4.50117	4.59898	4.56914	3.89906	4.69409	4.74574	4.57632	4.62109	4.32084	4.74662	4.26886
ID89	4.33396	4.459	4.52048	4.09022	4.27523	4.44456	4.49615	3.79266	4.54131	4.59697	4.45629	4.51857	4.25879	4.55047	4.14771
ID90	4.43855	4.25809	4.55923	4.10397	4.49691	4.625	4.53946	3.6895	4.68876	4.69256	4.61062	4.57091	4.14038	4.70417	4.23333
ID91	4.32993	4.27368	4.58351	3.83529	4.4707	4.60812	4.52498	3.69392	4.61637	4.66545	4.55365	4.58749	4.00999	4.76899	3.98716
ID92	4.22551	4.26002	4.48955	3.75415	4.5039	4.54264	4.4281	3.49076	4.62309	4.58754	4.5879	4.45407	3.87511	4.66026	3.95549
ID93	4.42197	4.51223	4.57066	4.22282	4.42967	4.5714	4.56291	NA	4.63999	4.70292	4.55516	4.53436	4.32417	4.63424	4.26386
ID94	4.2067	4.32378	4.44201	3.91481	4.1773	4.39657	4.39142	3.65893	4.51675	4.51268	4.4039	4.43419	4.13368	4.57482	4.00222
ID95	4.28939	4.33945	4.56342	3.93836	4.36406	4.58849	4.54563	3.64851	4.73783	4.69647	4.58048	4.56287	4.00391	4.73666	4.16362
ID96	4.26718	4.26595	4.59657	4.07774	4.42724	4.61251	4.5688	3.67846	4.63462	4.69811	4.59065	4.552	4.15123	4.71044	4.13365
ID97	4.26003	4.49491	4.63122	4.18773	4.48606	4.65501	4.59525	3.94594	4.70796	4.77249	4.55805	4.51917	4.21882	4.6985	4.17488
ID98	4.38035	4.49049	4.62472	4.24582	4.32032	4.57766	4.60972	3.76725	4.62863	4.7336	4.46368	4.61473	4.35155	4.69141	4.19669
ID99	4.32027	4.27077	4.64465	4.06145	4.48926	4.66703	4.55408	3.6256	4.71628	4.77514	4.58741	4.5905	4.08271	4.7868	4.13651
ID100	4.24697	4.39727	4.65547	4.29071	4.5281	4.70177	4.73066	3.72544	4.73543	4.8544	4.57607	4.62316	4.26002	4.82436	4.26302
ID101	4.36651	4.45493	4.61062	4.17897	4.41232	4.58391	4.62033	3.78261	4.65418	4.73713	4.55358	4.57207	4.23031	4.76618	4.23043
ID102	4.35421	4.31553	4.59764	3.89692	4.4831	4.61988	4.50128	3.67717	4.72994	4.73034	4.60243	4.61636	3.98682	4.78014	4.03774
ID103	4.26212	4.20988	4.4673	3.89645	4.33166	4.48542	4.49337	3.5728	4.57117	4.55334	4.51807	4.44839	3.93653	4.6069	4.03964
ID104	4.43544	4.48452	4.69359	4.19108	4.52555	4.75305	4.72092	3.74746	4.74975	4.82881	4.6047	4.67992	4.27184	4.78683	4.29378
ID105	4.08329	4.28305	4.50638	4.06086	4.34066	4.56285	4.62774	3.9788	4.69401	4.73978	4.50804	4.56635	3.82879	4.79725	4.03175
ID106	4.35867	4.32029	4.52345	3.95052	4.37104	4.53861	4.43369	3.64397	4.65076	4.64345	4.55144	4.5242	4.03213	4.64578	4.08295
ID107	4.21843	4.22829	4.48264	4.01212	4.3237	4.53729	4.49886	3.59343	4.62554	4.63486	4.49122	4.47429	3.959	4.69157	4.07834
ID108	4.40652	4.37412	4.76913	4.02046	4.42847	4.62619	4.54827	3.84958	4.64194	4.7657	4.60284	4.63927	4.25317	4.72454	4.10063
ID109	4.25774	4.16739	4.56897	4.04559	4.43591	4.61811	4.64201	3.57696	4.67482	4.7356	4.61878	4.4937	3.94089	4.75967	4.16516
ID110	4.29805	4.24856	4.50525	3.88376	4.31998	4.51074	4.53178	3.67664	4.62317	4.64893	4.49869	4.52271	3.86247	4.67562	4.08449
ID111	4.37544	4.36848	4.58081	3.73058	4.3606	4.58041	4.47884	3.71484	4.68595	4.57469	4.56171	4.57416	3.99048	4.76152	4.04575
ID112	4.2944	4.28254	4.55583	3.98688	4.38436	4.56162	4.53584	3.60747	4.67685	4.71383	4.55091	4.48926	3.9843	4.72525	4.04973
ID113	4.34329	4.22674	4.51975	4.0518	4.27884	4.55858	4.45455	3.40997	4.62235	4.66565	4.59494	4.43963	3.99961	4.56466	4.25699
ID114	4.14341	4.54983	4.56206	4.12577	4.41506	4.62405	4.5478	NA	4.60951	4.71122	4.56406	4.54822	3.98101	4.75556	4.10403
ID115	4.32078	4.22044	4.61103	3.86962	4.50125	4.65037	4.56282	3.60132	4.72415	4.75443	4.6195	4.61867	3.94959	4.76821	4.03821
ID116	4.40018	4.23496	4.69744	4.23115	4.59897	4.72566	4.58514	3.51858	4.71262	4.78836	4.65916	4.61504	4.29776	4.72323	4.24405
ID117	4.50497	4.47952	4.55922	3.98983	4.58968	4.70008	4.67884	3.80466	4.662	4.73113	4.64959	4.43792	3.75194	4.69643	4.32241
ID118	4.36999	4.40923	4.64711	4.24198	4.51305	4.75134	4.6596	3.61745	4.73426	4.78826	4.57627	4.70995	4.09534	4.75019	4.34039
ID119	4.33986	4.30902	4.54521	4.08352	4.40407	4.60831	4.49351	3.63135	4.71543	4.7175	4.56584	4.57923	4.03446	4.79032	4.23226
ID120	4.34475	4.46479	4.60992	4.16103	4.55327	4.63567	4.65916	3.61401	4.65461	4.7235	4.48954	4.59492	4.27916	4.80044	4.11287
ID121	4.30122	4.37369	4.57365	4.13091	4.25734	4.61984	4.61127	3.69229	4.76721	4.763	4.5925	4.54675	4.09048	4.72137	4.31533
ID122	4.30888	4.40151	4.53186	4.01091	4.40377	4.56607	4.50702	3.72956	4.63634	4.69601	4.54096	4.48719	4.04189	4.64913	4.1458
ID123	4.29303	4.2884	4.5125	4.11043	4.329	4.49615	4.48132	3.63587	4.53548	4.60275	4.42796	4.46465	4.24811	4.61495	4.08782
ID124	4.43094	4.34654	4.58581	4.17042	4.40483	4.64561	4.5362	3.54384	4.68276	4.75284	4.5977	4.53511	4.1119	4.64236	4.29407
ID125	4.13399	4.1448	4.52084	3.66207	4.4105	4.4572	4.39619	3.57594	4.6097	4.54701	4.53149	4.50055	3.85926	4.61693	3.85501
ID126	4.38762	4.47883	4.68617	4.31168	4.51293	4.65839	4.62662	4.06179	4.64671	4.72728	4.57194	4.56655	4.41163	4.72008	4.26202
ID127	4.23719	4.22905	4.47145	3.77875	4.36417	4.44694	4.36013	3.59493	4.54411	4.49969	4.45027	4.43868	4.02691	4.5286	3.87352
ID128	4.00013	4.29576	NA	3.60298	4.33942	4.43032	4.42231	3.91986	4.63459	4.60214	4.48287	4.54286	NA	4.75766	3.762
ID129	4.11916	4.24099	4.40965	3.76684	4.34407	4.44203	4.4026	3.51803	4.56559	4.5235	4.3708	4.40742	3.83298	4.6222	3.95075
ID130	4.26716	4.18279	4.54037	3.75736	4.51034	4.52465	4.38319	3.58449	4.62331	4.58826	4.51704	4.53411	3.95	4.70479	3.89313
ID131	4.32168	4.35501	4.67975	4.08477	4.46045	4.67064	4.61307	3.48308	4.81794	4.86067	4.60057	4.68871	4.24634	4.8	4.21519
ID132	4.30565	4.2249	4.59642	3.94071	4.43873	4.59066	4.49388	3.70149	4.54673	4.69172	4.50895	4.60135	4.04627	4.71051	3.99802
ID133	4.27422	4.31003	4.55694	4.08751	4.46635	4.60306	4.53717	3.60631	4.67676	4.72093	4.57962	4.50649	4.09828	4.64488	4.1809
ID134	4.30105	4.24747	4.52868	4.21318	4.4655	4.52917	4.49954	3.55736	4.58028	4.65135	4.59809	4.46527	4.26987	4.47487	4.15944
ID135	4.20747	4.48626	4.53611	3.89917	4.46251	4.59458	4.52822	NA	4.68783	4.67804	4.58482	4.5886	4.05569	4.71075	4.05034
ID136	4.16847	4.32284	4.47451	3.55874	4.49428	4.38286	4.38691	3.83818	4.4993	4.50101	4.42825	4.50475	3.75858	4.66798	3.65162
ID137	4.19433	4.32935	4.53404	4.06037	4.33384	4.52462	4.51511	3.74054	4.63489	4.61804	4.54602	4.53618	4.06601	4.65663	4.10186
ID138	4.42001	4.28474	4.66785	4.14815	4.40196	4.70415	4.58282	3.58302	4.68817	4.78996	4.65861	4.66541	4.14005	4.68508	4.35104
ID139	4.39025	4.43988	4.58894	4.2601	4.53654	4.61915	4.63934	3.56807	4.64974	4.71307	4.50813	4.59544	4.33504	4.73858	4.25294
ID140	4.3253	4.41011	4.61434	4.11046	4.33007	4.52611	4.59782	3.70703	4.65692	4.68723	4.46353	4.58568	4.24455	4.77246	4.12326
ID141	4.27694	4.25186	4.51	3.92772	4.47797	4.57992	4.4857	3.57006	4.61358	4.642	4.50041	4.49572	3.953	4.71081	4.03978
ID142	4.23921	4.33038	4.49044	3.97273	4.4687	4.55881	4.51201	3.64313	4.57899	4.62873	4.50681	4.52863	3.92491	4.66817	4.01327
ID143	4.24104	4.38187	4.46444	4.01834	4.35935	4.55439	4.50341	3.64711	4.6529	4.61881	4.51154	4.45936	3.89298	4.64778	4.15885
ID144	4.18672	4.34071	4.52114	4.07522	4.41319	4.56545	4.47236	3.64499	4.70174	4.68323	4.55444	4.52049	4.17722	4.69329	4.17008
ID145	4.21634	4.22014	4.52325	4.13903	4.33298	4.54781	4.45491	3.4681	4.6207	4.6571	4.54237	4.47332	4.04641	4.66864	4.23221
ID146	4.30561	4.32738	4.62145	3.72415	4.59354	4.4906	4.43971	3.85155	4.55926	4.64847	4.50529	4.59977	4.00932	4.70756	3.77683
ID147	4.1574	4.31782	4.43161	4.07385	4.2845	4.40912	4.49535	3.63624	4.48339	4.50953	4.33574	4.40609	4.05782	4.54796	4.09588
ID148	4.30382	4.27674	4.54863	4.03357	4.17699	4.58405	4.559	3.51591	4.67102	4.70071	4.57909	4.48095	3.99516	4.68988	4.25503
ID149	4.29484	4.15837	4.51926	3.74169	4.45541	4.5089	4.41557	3.57726	4.68674	4.6188	4.52868	4.54639	3.85844	4.73455	3.88251
ID150	4.5144	4.41849	4.63699	4.11642	4.56172	4.6735	4.59585	3.86035	4.68169	4.74277	4.64362	4.5821	4.17453	4.72859	4.27186
ID151	4.34129	4.35442	4.54511	4.14554	4.42034	4.60704	4.57296	3.89163	4.66393	4.68507	4.54663	4.49942	4.02674	4.71937	4.25768
ID152	4.30663	4.39062	4.63696	4.07984	4.50384	4.6738	4.62572	3.51046	4.74905	4.78309	4.54804	4.57656	4.23005	4.82191	4.20559
ID153	4.34517	4.24304	4.51992	3.99793	4.3838	4.54395	4.49719	3.41726	4.64004	4.67439	4.5003	4.46061	3.97289	4.66138	4.15844
ID154	4.25649	4.39137	4.50831	4.0996	4.39941	4.50307	4.51851	3.64802	4.60633	4.62733	4.46124	4.45978	4.12825	4.64328	4.13303
ID155	4.36793	4.29907	4.60926	3.90562	4.50884	4.6321	4.53053	3.70895	4.69698	4.72784	4.59956	4.6605	3.94248	4.76347	4.10452
ID156	4.06802	4.09289	4.41121	4.05793	4.25849	4.4086	4.42323	3.40126	4.5978	4.61567	4.44709	4.50823	3.94662	4.60639	3.96961
ID157	4.36187	4.27097	4.6013	4.15045	4.45512	4.60159	4.56953	3.56747	4.75236	4.76522	4.61223	4.58264	4.08777	4.72265	4.20564
ID158	4.38812	4.27658	4.57302	4.15386	4.35926	4.51638	4.51057	3.58461	4.62858	4.64457	4.49408	4.57142	4.19269	4.65882	4.19259
ID159	4.25437	4.33975	4.51895	3.87926	4.415	4.5894	4.47945	3.68675	4.65418	4.66019	4.56648	4.5386	4.00106	4.67592	4.00765
ID160	4.37544	4.44304	4.62155	4.19184	4.46497	4.63135	4.57083	3.55683	4.67611	4.75657	4.54812	4.60754	4.27907	4.7173	4.2479
ID161	4.40616	4.39158	4.65612	4.12401	4.61294	4.65136	4.54023	3.59465	4.71696	4.7669	4.56302	4.60808	4.19752	4.74737	4.17119
ID162	4.33006	4.41115	4.64639	4.29168	4.60249	4.715	4.6764	3.54334	4.75198	4.82969	4.56822	4.5642	4.16838	4.78454	4.31053
ID163	4.36685	4.299	4.61623	4.05756	4.33276	4.5891	4.50809	3.67455	4.63378	4.69774	4.52164	4.60176	4.19113	4.73473	4.14964
ID164	4.32603	4.31563	4.51065	3.84964	4.36953	4.54461	4.47466	3.68252	4.63318	4.6757	4.51728	4.55503	3.80045	4.69635	4.09356
ID165	4.26366	4.2815	4.53764	4.11678	4.4918	4.59963	4.46912	3.55042	4.68381	4.69632	4.62242	4.55856	3.98872	4.72456	4.17093
ID166	4.25333	4.44374	4.54575	4.21821	4.35728	4.58321	4.5517	3.98581	4.58824	4.6845	4.54202	4.48801	4.12729	4.62094	4.14596
ID167	4.37024	4.39522	4.548	4.05512	4.36025	4.59369	4.54193	3.74674	4.65522	4.61953	4.49799	4.54503	4.05193	4.72792	4.19613
ID168	4.40434	4.43648	4.65617	4.08591	4.38644	4.57483	4.58766	3.70126	4.6657	4.69999	4.49749	4.67441	4.24091	4.7051	4.1312
ID169	4.3034	4.40733	4.56569	4.13985	4.3356	4.47361	4.54246	3.64688	4.58583	4.59395	4.42407	4.5373	4.28096	4.65194	4.14953
ID170	4.32165	4.28842	4.5834	3.98878	4.42708	4.60256	4.51699	3.62007	4.80294	4.70079	4.61729	4.58609	4.11872	4.77064	4.14704
ID171	4.33148	4.27212	4.45763	4.07744	4.35703	4.48409	4.42413	3.54196	4.58239	4.60026	4.46934	4.43505	4.15171	4.52035	4.12486
ID172	4.40569	4.50307	4.65503	4.33693	4.55569	4.64137	4.67261	3.73633	4.70185	4.77055	4.59508	4.61724	4.40111	4.69839	4.24619
ID173	4.21486	4.16136	4.44247	4.08076	4.34143	4.47368	4.41425	3.50909	4.53054	4.64843	4.47478	4.44885	3.97935	4.5712	4.09786
ID174	4.40069	4.28509	4.67301	4.16467	4.50634	4.7333	4.62677	3.58142	4.65923	4.76283	4.61739	4.53945	4.17341	4.72207	4.30725
ID175	4.36289	4.31838	4.56742	4.06685	4.42278	4.64707	4.55112	3.68225	4.73497	4.71864	4.62497	4.52733	3.95101	4.71868	4.26931
ID176	4.40892	4.46919	4.65219	4.15247	4.42668	4.641	4.60433	3.72356	4.73407	4.78338	4.53763	4.68366	4.29021	4.79939	4.24569
ID177	4.26257	4.40922	4.48085	4.05478	4.2784	4.47176	4.39579	3.59306	4.62814	4.64963	4.45698	4.38177	3.94871	4.50447	4.17639
ID178	4.39881	4.38847	4.64041	4.05592	4.50261	4.60692	4.5651	3.68465	4.72374	4.70256	4.60778	4.56176	4.12791	4.75596	4.19845
ID179	4.22962	4.29029	4.51307	4.08547	4.37854	4.51671	4.50713	3.61001	4.63243	4.66763	4.54637	4.46541	3.96153	4.65815	4.18294
ID180	4.23095	4.20232	4.43945	3.9417	4.25529	4.49559	4.45505	3.51827	4.56333	4.5889	4.42447	4.4088	3.9	4.52885	4.11191
ID181	4.36463	4.34674	4.58878	4.09318	4.51171	4.67867	4.53723	3.57259	4.76701	4.74459	4.64661	4.57537	4.21542	4.71989	4.22815
ID182	4.14144	4.37416	4.50249	4.06189	4.3466	4.57735	4.55562	3.53913	4.71234	4.68333	4.53221	4.51995	4.03367	4.72353	4.16915
ID183	4.4098	4.35834	4.62821	4.10289	4.3639	4.6121	4.53124	3.72492	4.64846	4.72383	4.5865	4.56776	4.15958	4.68971	4.29461
ID184	4.26202	4.13413	4.49498	3.98387	4.28481	4.52899	4.45153	3.51571	4.63479	4.6409	4.53283	4.52224	3.9949	4.65963	4.08742
ID185	4.21137	4.29651	4.53486	4.23159	4.46782	4.59864	4.58218	3.5982	4.56443	4.70773	4.48277	4.54927	4.12604	4.64739	4.10525
ID186	4.28671	4.28483	4.65166	4.05946	4.41894	4.70851	4.57393	3.55922	4.73289	4.77697	4.55126	4.65514	4.14304	4.83749	4.20581
ID187	4.4395	4.33007	4.68528	4.24538	4.42326	4.652	4.58872	3.63807	4.66667	4.77875	4.587	4.62337	4.35176	4.71539	4.24732
ID188	4.2486	4.29648	4.53623	4.02193	4.34011	4.55471	4.53294	3.5657	4.55412	4.6611	4.49823	4.4511	4.0612	4.63057	4.10687
ID189	4.31066	4.22377	4.79359	4.13567	4.58086	4.73108	4.65733	3.63314	4.73615	4.82605	4.66426	4.63355	4.20763	4.83078	4.16947
ID190	4.28498	4.31673	4.55388	4.12779	4.40522	4.60677	4.50643	3.59732	4.61978	4.70433	4.56088	4.55044	4.1522	4.64968	4.2222
ID191	4.25909	4.35369	4.69346	4.29021	4.57095	4.74152	4.68729	3.65297	4.70945	4.86467	4.61601	4.56293	4.21602	4.81707	4.26392
ID192	4.22729	4.34042	4.4782	3.96984	4.3161	4.54464	4.55251	3.78373	4.67428	4.66021	4.55569	4.48277	3.96405	4.7112	4.13002
ID193	4.42947	4.3265	4.57015	3.72277	4.74235	4.65257	4.54038	3.78625	4.60843	4.61472	4.59732	4.58959	3.82292	4.75464	3.84064
ID194	4.33943	4.4668	4.5609	4.25931	4.4523	4.5993	4.63173	3.74294	4.61662	4.67836	4.51383	4.51108	4.30098	4.64956	4.22321
ID195	4.05841	4.23766	4.55666	4.35726	4.29255	4.45539	4.48655	3.51101	4.49926	4.58067	4.37126	4.44403	4.03132	4.54187	4.11553
ID196	4.32453	4.53491	4.67833	4.32941	4.57306	4.65907	4.70491	3.76884	4.72935	4.77169	4.56731	4.62564	4.39609	4.81637	4.21399
ID197	4.39465	4.30133	4.59878	4.02469	4.44738	4.669	4.53776	3.70366	4.69781	4.75096	4.56334	4.56481	4.13019	4.74099	4.20634
ID198	4.27784	4.35904	4.55844	4.21807	4.41167	4.60977	4.57231	3.72342	4.64442	4.69984	4.50815	4.50941	4.14244	4.66874	4.22605
ID199	4.26896	4.22888	4.57337	4.10603	4.38929	4.60825	4.5667	3.54164	4.60099	4.66769	4.55785	4.51774	4.16425	4.68275	4.22335
ID200	4.3909	4.33826	4.65399	4.17333	4.45582	4.68689	4.63735	3.59997	4.72134	4.77876	4.59873	4.62699	4.13376	4.75142	4.28808
ID201	4.31169	4.26921	4.58419	4.0587	4.36225	4.58834	4.65739	3.63954	4.6931	4.78585	4.54744	4.59887	3.9182	4.78505	4.17101
ID202	4.27622	4.33692	4.67489	4.18247	4.48757	4.76419	4.68244	3.71985	4.79763	4.8222	4.67802	4.61087	4.20777	4.85306	4.21489
ID203	4.36552	4.2334	4.66147	4.20088	4.46647	4.68801	4.57371	3.48791	4.67975	4.77893	4.60159	4.59568	4.21329	4.71584	4.27243
ID204	4.3798	4.47122	4.66489	4.18014	4.62904	4.70621	4.62109	3.6289	4.71144	4.79835	4.62558	4.57823	4.24834	4.69434	4.24478
ID205	4.27787	4.39401	4.51006	4.2388	4.36079	4.63459	4.5864	3.73645	4.6892	4.74776	4.56353	4.55974	4.07667	4.70342	4.23758
ID206	4.27193	4.32745	4.5048	3.89563	4.38122	4.56828	4.54819	3.79011	4.63061	4.64837	4.53279	4.56855	3.95682	4.69959	4.14387
ID207	4.22667	4.27293	4.44816	3.88197	4.3385	4.52576	4.4574	3.51461	4.60865	4.61081	4.44286	4.46681	3.79787	4.69969	4.11199
ID208	4.43943	4.42845	4.70662	3.95283	4.63054	4.6321	4.51635	3.76746	4.64186	4.74306	4.57863	4.67767	4.20934	4.78963	3.96356
ID209	4.30644	4.26101	4.55652	4.01461	4.42105	4.57414	4.52036	3.62598	4.70533	4.6881	4.55998	4.62791	4.01485	4.72702	4.125
ID210	4.26128	4.24532	4.54423	4.02288	4.25871	4.48488	4.48775	3.52627	4.652	4.63615	4.50667	4.5386	4.11086	4.61735	4.04493
ID211	4.36579	4.26543	4.57425	4.26653	4.55013	4.68936	4.67871	3.58063	4.6741	4.8316	4.59364	4.53049	3.97841	4.76599	4.34036
ID212	4.31217	4.20514	4.55342	3.96797	4.40007	4.52262	4.49447	3.55864	4.68598	4.68292	4.54327	4.581	3.95533	4.72154	4.0673
ID213	4.27354	4.18043	4.5421	4.13869	4.32846	4.5197	4.53827	3.47716	4.54329	4.61299	4.49164	4.49358	4.1613	4.65869	4.12361
ID214	4.44583	4.4823	4.68776	4.23028	4.50023	4.64482	4.58645	3.53568	4.73906	4.84051	4.56715	4.68359	4.38093	4.76693	4.16062
ID215	4.30764	4.28052	4.58603	4.08115	4.33919	4.58732	4.50326	3.50629	4.63453	4.71457	4.61287	4.57383	4.10872	4.6616	4.19647
ID216	4.33089	4.39869	4.63527	4.20873	4.4202	4.64812	4.5629	3.59006	4.74838	4.76615	4.60714	4.54761	4.22483	4.70211	4.31111
ID217	4.30933	4.20848	4.57573	4.11499	4.42272	4.64057	4.51203	3.55497	4.68688	4.73512	4.47871	4.62422	4.14446	4.68009	4.22329
ID218	4.34861	4.47891	4.61875	4.22954	4.45604	4.61841	4.65298	3.61693	4.59515	4.71156	4.50979	4.56086	4.31701	4.65197	4.19017
ID219	4.27122	4.31282	4.54446	4.15956	4.25358	4.57511	4.58319	3.58369	4.61459	4.69147	4.50571	4.53308	3.99779	4.70339	4.24771
ID220	4.41559	4.4375	4.61898	4.0652	4.34022	4.66803	4.59906	3.83815	4.74421	4.8038	4.64996	4.60166	4.01813	4.743	4.31122
ID221	4.37936	4.36595	4.53525	3.90241	4.34787	4.48222	4.50354	3.7256	4.58398	4.52768	4.5285	4.50958	4.16344	4.63425	4.00916
ID222	4.276	4.34124	4.5439	4.21063	4.34144	4.50685	4.48599	3.61236	4.64718	4.65139	4.46756	4.50374	4.26822	4.72938	4.18084
ID223	4.25235	4.36819	4.54644	4.13683	4.40334	4.59406	4.58226	3.55677	4.7375	4.74901	4.54764	4.55458	4.07256	4.72652	4.17104
ID224	4.34523	4.38946	4.65724	4.29156	4.52291	4.72765	4.61423	3.54292	4.7342	4.84609	4.6353	4.55732	4.1699	4.73578	4.36225
ID225	4.34892	4.4654	4.67126	4.24138	4.39114	4.68006	4.62839	3.56716	4.72622	4.80202	4.54009	4.55337	4.22774	4.71507	4.38307
ID226	4.44145	4.39034	4.64685	4.01404	4.56336	4.60805	4.64211	3.86894	4.6776	4.73743	4.66438	4.64804	4.12114	4.72808	4.13722
ID227	4.30535	4.39082	4.54952	4.09332	4.4199	4.57102	4.62661	3.6984	4.62842	4.67843	4.57895	4.56853	4.04432	4.72944	4.20173
ID228	4.28871	4.29717	4.50814	4.02688	4.3093	4.51885	4.50842	3.61365	4.6177	4.62065	4.5085	4.48457	4.0301	4.66088	4.12967
ID229	4.29091	4.34104	4.59417	4.26289	4.18481	4.54199	4.52847	3.52914	4.65678	4.6877	4.49854	4.5579	4.31887	4.65887	4.25301
ID230	4.41225	4.38877	4.66755	4.22265	4.49225	4.7129	4.62086	3.64036	4.69093	4.7891	4.64514	4.64056	4.35706	4.74405	4.36236
ID231	4.2748	4.34272	4.59829	4.1985	4.31263	4.55397	4.52936	3.55315	4.65945	4.67168	4.50166	4.53845	4.22597	4.66635	4.17604
ID232	4.27963	4.44357	4.57314	3.98548	4.49511	4.5559	4.43196	4.11558	4.62984	4.64454	4.54779	4.52909	4.06199	4.6271	3.99777
ID233	4.33221	4.323	4.67218	4.21648	4.5082	4.71319	4.67068	3.61779	4.76774	4.78916	4.64511	4.62323	4.27003	4.84572	4.27481
ID234	4.34139	4.40277	4.64946	4.08422	4.34207	4.66999	4.63206	3.77298	4.70388	4.79453	4.54837	4.60295	4.08875	4.73068	4.263
ID235	4.29027	4.35655	4.58798	4.18347	4.37359	4.60751	4.59562	3.54311	4.69629	4.71309	4.58629	4.48534	4.04266	4.69252	4.29609
ID236	4.33323	4.30152	4.5792	4.21021	4.32309	4.65284	4.55058	3.53329	4.70419	4.77501	4.63201	4.48238	4.15222	4.59222	4.34788
ID237	4.30531	4.25812	4.50574	3.76827	4.32099	4.5362	4.42663	3.66003	4.68953	4.70197	4.52812	4.59649	3.99452	4.68045	3.96778
ID238	4.39096	4.37836	4.64058	4.15634	4.35193	4.70344	4.69633	3.60891	4.76651	4.79649	4.61676	4.61307	4.16525	4.82393	4.39062
ID239	4.30178	4.26634	4.53428	3.95176	4.35949	4.52393	4.50556	3.5934	4.61234	4.60005	4.50561	4.52492	4.02967	4.73196	4.08857
ID240	4.41115	4.47542	4.6557	4.24187	4.46283	4.64117	4.6066	3.79596	4.70712	4.77796	4.59442	4.59811	4.24942	4.75893	4.28655
ID241	4.37523	4.38851	4.67644	4.14155	4.55666	4.71445	4.68274	3.61976	4.71169	4.80946	4.59506	4.62727	4.14584	4.80264	4.21384
ID242	4.40038	4.38986	4.56221	4.03326	4.40915	4.60763	4.54784	3.624	4.66264	4.67434	4.58316	4.5506	3.99271	4.70807	4.26241
ID243	4.30013	4.38427	4.62583	4.13279	4.36243	4.60747	4.60219	3.6027	4.63158	4.70375	4.51635	4.48629	4.12903	4.70194	4.26136
ID244	4.42327	4.38953	4.68203	3.91694	4.63039	4.66014	4.56628	3.77281	4.61404	4.74812	4.54317	4.66019	4.01446	4.74441	3.97298
ID245	4.27201	4.40588	4.63122	4.24399	4.50568	4.71842	4.66917	3.64261	4.73967	4.81403	4.64432	4.55659	4.18437	4.69087	4.29218
ID246	4.31085	4.47884	4.65988	4.0585	4.42103	4.65852	4.69375	3.74025	4.71579	4.78542	4.58749	4.65324	4.10409	4.84629	4.18732
ID247	4.29958	4.23165	4.532	4.09423	4.31627	4.57254	4.50796	3.56474	4.58386	4.6642	4.50509	4.51822	4.04883	4.62511	4.20338
ID248	4.18455	4.27886	4.37034	3.56645	4.25022	4.3553	4.37615	3.61074	4.48521	4.44465	4.36646	4.45666	3.80924	4.54337	3.8077
ID249	4.33862	4.35048	4.52342	4.11182	4.37827	4.48266	4.51637	3.61967	4.65765	4.55442	4.47834	4.50423	4.22445	4.70774	4.13986
ID250	4.2488	4.30306	4.53432	3.93578	4.27422	4.5181	4.48198	3.66091	4.62958	4.65114	4.53125	4.59052	4.02335	4.71653	4.10782
ID251	4.17921	4.2144	4.41398	3.91817	4.40166	4.49284	4.41807	3.36071	4.49059	4.58665	4.35638	4.4699	3.88725	4.57473	4.05741
ID252	4.34336	4.32384	4.59667	4.17073	4.46258	4.59389	4.58296	3.4621	4.70693	4.72399	4.53789	4.63585	4.17379	4.75703	4.23616
ID253	4.29116	4.27513	4.53045	4.10726	4.4135	4.62231	4.52509	3.74768	4.57229	4.71662	4.51795	4.47759	3.94084	4.61019	4.18875
ID254	4.36693	4.35876	4.59431	4.13364	4.44212	4.6319	4.57614	3.6592	4.6806	4.74901	4.53079	4.56765	4.08154	4.71496	4.20147
ID255	4.13363	4.36282	4.51773	3.83228	4.50546	4.55955	4.39684	3.76967	4.68584	4.64318	4.63838	4.57463	3.90232	4.7199	3.86319
ID256	4.17695	4.25321	4.29826	NA	4.53166	NA	4.44831	3.81308	4.43038	NA	4.26502	4.53254	NA	4.70956	NA
ID257	4.27263	4.22206	4.51108	3.49085	4.36713	4.43782	4.29548	3.57712	4.63476	4.52885	4.46935	4.50941	3.84435	4.55097	3.81515
ID258	4.34898	4.33571	4.60257	3.84217	4.59554	4.60675	4.506	3.72566	4.67755	4.69268	4.65058	4.59507	3.98561	4.75202	3.95449
ID259	4.41327	4.5387	4.67559	4.34279	4.56058	4.66501	4.66782	3.89784	4.7557	4.7864	4.61376	4.60178	4.39013	4.76246	4.26319
ID260	4.41206	4.26662	4.61263	4.16684	4.45109	4.64341	4.57675	3.66743	4.67983	4.75617	4.60963	4.53311	4.2057	4.73821	4.2531
ID261	3.95554	4.44321	4.5756	4.11492	4.51142	4.63138	4.68347	3.79242	4.69849	4.80588	4.58006	4.40792	3.95808	4.75491	3.9288
ID262	4.33156	4.20624	4.58413	4.18288	4.45347	4.63884	4.60655	3.51518	4.58055	4.76328	4.47717	4.5889	4.06772	4.6447	4.23321
ID263	4.1417	4.29144	4.39827	3.98021	4.21102	4.34316	4.42121	3.4798	4.51102	4.46513	4.2893	4.36893	4.12766	4.60385	3.97607
ID264	4.30173	4.18421	4.51616	3.97322	4.31966	4.57343	4.45575	3.42432	4.66053	4.68276	4.53354	4.49167	3.92008	4.56476	4.19423
ID265	4.20998	4.25522	4.44989	3.83947	4.30912	4.51926	4.41744	3.52934	4.58615	4.60752	4.50203	4.50523	3.70745	4.63363	4.05826
ID266	4.22105	4.32985	4.55407	3.78157	4.61652	4.62137	4.56532	3.69004	4.63797	4.65411	4.59294	4.63246	3.91949	4.81065	3.83871
ID267	4.47261	4.33542	4.65222	4.00561	4.4461	4.69974	4.53198	3.71602	4.81163	4.81241	4.72625	4.63213	4.16402	4.7045	4.28214
ID268	4.20382	4.4524	4.4717	3.96513	4.37667	4.5594	4.53397	3.53336	4.68636	4.67527	4.47977	4.46005	3.90718	4.63644	4.17472
ID269	4.27168	4.18523	4.58372	4.22265	4.40998	4.6534	4.63451	3.42294	4.59629	4.7635	4.51183	4.58992	4.14691	4.65608	4.23417
ID270	4.27846	4.3465	4.50309	4.22462	4.4931	4.5427	4.55453	3.52888	4.5523	4.64373	4.4191	4.47936	4.27322	4.61312	4.11776
ID271	4.27741	4.28241	4.56225	4.13741	4.37425	4.50961	4.49858	3.57229	4.54496	4.60691	4.44708	4.47603	4.29799	4.61423	4.14188
ID272	4.49839	4.39833	4.52775	4.1723	4.42684	4.51753	4.65462	3.69183	4.63544	4.65744	4.54209	4.49454	4.2691	4.68719	4.27971
ID273	4.1605	4.31903	4.49901	4.03522	4.43051	4.61249	4.58701	3.58826	4.60196	4.69033	4.55388	4.58026	3.97908	4.71093	4.11834
ID274	4.22415	4.38647	4.36961	4.03898	4.21189	4.37315	4.28825	3.64922	4.49598	4.4943	4.36291	4.32815	4.04592	4.43808	4.11319
ID275	4.21737	4.18452	4.49138	4.00782	4.4825	4.58271	4.53809	3.53727	4.57854	4.6587	4.53145	4.49432	3.8729	4.64429	4.08977
ID276	4.31711	4.29223	4.58162	4.14801	4.41919	4.54742	4.49679	3.60704	4.6612	4.71402	4.52681	4.53825	4.16432	4.63836	4.11553
ID277	4.23463	4.2958	4.49408	4.03266	4.32459	4.52484	4.52774	3.46324	4.58555	4.62082	4.43696	4.4726	4.00345	4.69334	4.13746
ID278	4.35322	4.45481	4.63535	4.2051	4.46462	4.65641	4.62414	3.82836	4.69371	4.72614	4.61628	4.57762	4.24097	4.77019	4.23512
ID279	4.35496	4.31373	4.5755	3.82816	4.47694	4.5209	4.46023	3.69731	4.55266	4.62378	4.47203	4.64174	4.04513	4.67062	3.91325
ID280	4.28268	4.43854	4.57263	3.89119	4.38657	4.57792	4.5471	3.76866	4.73973	4.71937	4.56009	4.56653	4.04739	4.7477	4.11581
ID281	4.45006	4.32016	4.69232	4.38233	4.44509	4.69948	4.62975	3.58501	4.74455	4.84386	4.57479	4.64326	4.31618	4.7447	4.37828
ID282	4.16196	4.29369	4.50479	4.00998	4.22635	4.45008	4.51207	3.61295	4.58395	4.56799	4.37167	4.47371	4.06895	4.68092	4.07983
ID283	4.37196	4.41487	4.50711	3.90307	4.31644	4.42929	4.50334	3.82589	4.56096	4.48562	4.43346	4.52823	4.17734	4.64464	4.01534
ID284	4.32509	4.26896	4.65566	4.07409	4.54865	4.65389	4.52682	3.53233	4.61838	4.74546	4.59038	4.62097	4.22871	4.72718	4.02507
ID285	4.44514	4.25957	4.66613	4.16855	4.50036	4.71617	4.5852	3.5532	4.75659	4.84696	4.62513	4.64604	4.09129	4.66868	4.3766
ID286	4.30149	4.35824	4.58946	4.18032	4.35422	4.62036	4.55738	3.53834	4.69679	4.75566	4.59102	4.50725	4.17529	4.68018	4.26408
ID287	4.27578	4.37254	4.64012	4.16971	4.494	4.66121	4.58892	3.87477	4.73285	4.74059	4.62802	4.61668	4.25424	4.77239	4.23074
ID288	3.96165	4.26198	4.21474	NA	4.79768	NA	NA	3.83935	NA	NA	4.24157	4.55149	NA	4.68566	NA
ID289	4.37865	4.22984	4.62995	4.06898	4.40912	4.68815	4.5876	3.60435	4.69851	4.77641	4.55283	4.5893	4.09425	4.66837	4.34148
ID290	4.18866	4.20993	4.42867	4.09342	4.28139	4.50962	4.44356	3.55925	4.59994	4.62399	4.4593	4.4203	4.00661	4.56615	4.1082
ID291	4.20761	4.30504	4.50183	3.97465	4.36869	4.57172	4.50932	3.66105	4.69258	4.67367	4.55218	4.47353	4.02846	4.6896	4.13431
ID292	4.32549	4.35433	4.60313	4.16013	4.44	4.68419	4.57758	3.61723	4.7009	4.75709	4.63026	4.57892	4.14217	4.68943	4.3182
ID293	4.31355	4.26621	4.59454	4.2677	4.46349	4.60485	4.48708	3.50151	4.56623	4.72145	4.51241	4.47923	4.23677	4.59428	4.23128
ID294	4.29926	4.35358	4.50292	3.80699	4.52463	4.55365	4.50021	3.75483	4.55665	4.6456	4.51703	4.54359	3.70539	4.6832	3.96778
ID295	4.34217	4.36016	4.63679	4.24487	4.36857	4.6347	4.62203	3.65909	4.70083	4.77741	4.59005	4.62814	4.16983	4.73644	4.30832
ID296	4.27725	4.30235	4.48903	4.03476	4.32655	4.55521	4.49765	3.7075	4.61964	4.62234	4.50974	4.45621	3.9737	4.62061	4.13752
ID297	4.27769	4.44754	4.51588	4.0642	4.39319	4.57671	4.51662	3.84233	4.66638	4.67491	4.55265	4.46259	4.02351	4.64627	4.22162
ID298	4.2902	4.17917	4.5206	3.87935	4.43198	4.5043	4.36736	3.57414	4.53461	4.62778	4.50567	4.49136	3.99283	4.55141	3.9321
ID299	4.29922	4.25748	4.47659	4.16501	4.35991	4.5236	4.48136	3.64192	4.60055	4.67999	4.44967	4.37586	4.01948	4.54877	4.24058
ID300	4.29459	4.31643	4.56203	4.10996	4.4027	4.57785	4.53034	3.52718	4.63982	4.70707	4.52835	4.52726	4.14673	4.68377	4.13944
ID301	4.31387	4.28422	4.51083	3.45287	4.46365	4.45445	4.36088	3.77599	4.62049	4.5383	4.52701	4.6374	3.64734	4.73728	3.74084
ID302	4.43636	4.48812	4.67241	3.87368	4.60103	4.66163	4.57594	3.97029	4.61029	4.69447	4.58324	4.70526	4.06017	4.74082	3.94513
ID303	4.29281	4.37107	4.49936	4.09465	4.35743	4.56916	4.49158	3.62062	4.67422	4.67219	4.57246	4.57467	3.96528	4.64932	4.28581
ID304	4.36849	4.24545	4.60303	4.14396	4.33858	4.59969	4.52614	3.58829	4.73733	4.69261	4.57217	4.61579	4.16931	4.71871	4.20615
ID305	4.2956	4.21716	4.53855	4.15923	4.42058	4.4752	4.49823	3.43157	4.57182	4.58198	4.43513	4.44561	4.23313	4.69451	4.18584
ID306	4.25963	4.17234	4.49867	3.95536	4.37752	4.518	4.32726	3.55126	4.62107	4.61469	4.54059	4.42106	3.9868	4.59479	4.03055
ID307	4.43391	4.36363	4.50619	4.12454	4.36195	4.56286	4.47755	3.60163	4.63211	4.64257	4.51284	4.49677	4.2596	4.62298	4.196
ID308	4.40412	4.33359	4.59795	4.18108	4.44021	4.61741	4.55719	3.64962	4.71453	4.72289	4.58604	4.57487	4.23462	4.68094	4.2571
ID309	4.28627	4.43506	4.55627	4.09284	4.36687	4.55326	4.52855	3.7583	4.70631	4.64998	4.51977	4.5722	4.20691	4.68839	4.15054
ID310	4.31306	4.29723	4.62819	4.27313	4.4008	4.66054	4.58323	3.69855	4.68488	4.75479	4.53894	4.58047	4.24365	4.73841	4.24783
ID311	4.33623	4.55118	4.67451	4.22606	4.55792	4.71438	4.63701	3.84363	4.73917	4.80544	4.69324	4.67803	4.1889	4.832	4.15826
ID312	4.21664	4.18821	4.57289	3.96946	4.40584	4.54774	4.56718	3.53498	4.6546	4.62393	4.64446	4.55616	4.00738	4.65925	4.0675
ID313	4.36772	4.47864	4.66696	4.19997	4.37572	4.6699	4.65648	3.66957	4.76433	4.7905	4.60096	4.64164	4.17068	4.79491	4.3324
ID314	4.03542	4.33118	4.61998	4.08446	4.45837	4.63735	4.49797	3.51396	4.68362	4.75772	4.63665	4.62921	4.15512	4.66341	3.99462
ID315	4.28064	4.3672	4.41241	3.84748	4.27985	4.47918	4.41005	3.87769	4.54987	4.5769	4.43242	4.48663	3.79253	4.63687	4.03822
ID316	4.38519	4.37631	4.63344	4.13211	4.4355	4.63886	4.60193	3.51011	4.68991	4.77345	4.50545	4.56018	4.11028	4.737	4.28683
ID317	4.43882	4.33705	4.64074	4.11668	4.54325	4.69228	4.50791	3.56011	4.747	4.80675	4.69594	4.57445	4.25448	4.68945	4.29503
ID318	4.33993	4.33412	4.60979	3.94972	4.30853	4.59464	4.44849	3.69404	4.68403	4.6972	4.5647	4.60856	4.02378	4.65263	4.14936
ID319	4.38264	4.37521	4.68179	4.2042	4.38013	4.59873	4.66826	3.67787	4.60883	4.73284	4.51242	4.63754	4.37063	4.66054	4.17259
ID320	4.20035	4.34219	4.58826	3.99846	4.4333	4.57829	4.5583	3.54376	4.69037	4.71421	4.50812	4.56592	4.02838	4.62497	4.09112
ID321	4.39124	4.33755	4.50941	4.08944	4.26241	4.55239	4.43107	3.59259	4.64791	4.63466	4.47855	4.53591	3.99103	4.58781	4.29887
ID322	4.19995	4.30586	4.55981	4.09586	4.35535	4.55198	4.5361	3.81191	4.58172	4.66632	4.55245	4.50664	4.17446	4.69485	4.15122
ID323	4.24547	4.26442	4.52481	3.96203	4.39627	4.5352	4.47148	3.60726	4.58166	4.61614	4.51939	4.46479	4.01877	4.64473	4.08449
ID324	4.21057	4.258	4.45299	3.98623	4.36039	4.43536	4.45974	3.5635	4.52081	4.55485	4.38084	4.45507	4.03985	4.59158	3.99161
ID325	4.30486	4.21262	4.57565	3.69757	4.45902	4.55277	4.37845	3.66795	4.68373	4.66978	4.57866	4.57123	3.91282	4.69002	3.92383
ID326	4.22036	4.17969	4.45713	3.79273	4.29621	4.44876	4.39905	3.60397	4.55092	4.53811	4.43871	4.4606	3.91324	4.61174	3.96426
ID327	4.3965	4.35953	4.59934	3.95549	4.57529	4.58207	4.48333	3.72902	4.63448	4.66043	4.53368	4.62014	4.18681	4.71656	4.01616
ID328	4.22597	4.30731	4.57072	4.04011	4.49573	4.64029	4.57812	3.59615	4.60427	4.73323	4.58782	4.52469	4.0235	4.69431	4.05359
ID329	4.30354	4.17466	4.56708	4.00429	4.39205	4.55463	4.53388	3.51675	4.63498	4.68081	4.54607	4.56954	3.93778	4.76895	4.11291
ID330	4.45578	4.37654	4.65598	4.19647	4.50658	4.7299	4.65782	3.65363	4.83332	4.8423	4.70577	4.65809	4.02555	4.79432	4.37938
ID331	4.23749	4.22732	4.50578	3.97877	4.37577	4.58229	4.51163	3.47301	4.5345	4.6754	4.52805	4.49879	4.03576	4.47879	4.17939
ID332	4.37069	4.3846	4.70085	4.1749	4.33843	4.71155	4.67715	3.65534	4.75616	4.82652	4.62929	4.64282	4.22328	4.82872	4.34988
ID333	4.40509	4.34823	4.61246	3.97526	4.36408	4.58447	4.50704	3.62343	4.77405	4.72348	4.60362	4.59119	4.13488	4.70598	4.12074
ID334	4.36085	4.31612	4.53414	3.84841	4.44478	4.49541	4.41273	3.66657	4.63951	4.58961	4.50971	4.4908	4.03315	4.69065	4.03181
ID335	4.29514	4.38139	4.54831	4.10706	4.2649	4.54414	4.55148	3.8639	4.60293	4.66673	4.52378	4.47228	4.08973	4.63701	4.19365
ID336	4.38332	4.24909	4.62641	3.96512	4.55889	4.6398	4.48028	3.59813	4.6597	4.73302	4.55365	4.59907	4.09915	4.71127	4.00131
ID337	4.26492	4.40938	4.45665	4.06105	4.4303	4.47931	4.46908	3.67925	4.52222	4.54622	4.46533	4.5173	4.09922	4.59823	4.11875
ID338	4.24448	4.26202	4.56422	4.0663	4.34506	4.59174	4.48283	3.46739	4.65192	4.73175	4.57918	4.55737	4.01392	4.60029	4.1735
ID339	4.37495	4.35591	4.57939	3.87239	4.48912	4.58455	4.49966	3.72146	4.66362	4.65878	4.56246	4.55778	3.99233	4.69365	4.04636
ID340	4.25906	4.22182	4.54466	4.0099	4.36609	4.62563	4.50899	3.61216	4.68524	4.74521	4.60621	4.47146	3.87414	4.67223	4.16139
ID341	4.47636	4.26144	4.52686	4.09647	4.39454	4.5707	4.46587	3.55659	4.57103	4.6493	4.51359	4.54062	4.17687	4.52725	4.24189
ID342	4.45621	4.3329	4.60439	4.13969	4.43746	4.60047	4.53048	3.57636	4.63321	4.67653	4.55686	4.54263	4.25005	4.63964	4.21211
ID343	4.2	4.33678	4.60373	4.07601	4.4718	4.58796	4.58997	3.61079	4.63639	4.74698	4.4784	4.62852	4.09984	4.73795	4.08357
ID344	4.17491	4.36102	4.36923	4.03746	4.20447	4.33479	4.44901	3.75468	4.4445	4.51155	4.27916	4.4486	4.06191	4.55633	4.02739
ID345	4.30171	4.309	4.52637	4.08751	4.3037	4.61769	4.55047	3.51267	4.63417	4.705	4.55746	4.45971	4.0132	4.61848	4.29814
ID346	4.34649	4.3524	4.51241	3.81593	4.48021	4.51888	4.45852	3.7584	4.65415	4.61027	4.59233	4.57792	3.89889	4.6805	4.02005
ID347	4.26209	4.25724	4.52684	3.97149	4.3619	4.60223	4.49545	3.65955	4.68748	4.69693	4.53828	4.50437	4.04951	4.72557	4.14081
ID348	4.32928	4.34342	4.57023	4.0391	4.38484	4.60877	4.51789	3.70986	4.61716	4.6921	4.60038	4.51428	4.02429	4.63005	4.23249
ID349	4.38792	4.3896	4.60013	4.319	4.37899	4.60214	4.57605	3.53959	4.62213	4.70077	4.54678	4.54412	4.41628	4.62414	4.32598
ID350	4.28821	4.29374	4.60651	3.9428	4.44057	4.63655	4.59703	3.73629	4.71465	4.73739	4.57865	4.60983	4.0983	4.8265	4.05641
ID351	4.24516	4.35109	4.50789	4.12897	4.38536	4.49012	4.50968	3.60253	4.59084	4.599	4.4737	4.4894	4.19555	4.64157	4.07448
ID352	4.2573	4.24793	4.58064	4.0979	4.34937	4.56662	4.41361	3.54242	4.55128	4.63804	4.50346	4.54912	4.09427	4.53649	4.13948
ID353	4.32621	4.30389	4.43949	4.14199	4.45275	4.52321	4.47122	3.61116	4.5825	4.56999	4.53016	4.46418	4.22283	4.64515	4.16294
ID354	4.43633	4.34019	4.59469	4.01051	4.4753	4.52973	4.47359	3.81229	4.56435	4.68509	4.44675	4.62969	4.19177	4.60673	4.05779
ID355	4.37847	4.32383	4.66169	3.75908	4.59332	4.57774	4.41949	3.82664	4.53854	4.69305	4.54744	4.61597	3.98371	4.72121	3.8565
ID356	4.28562	4.3766	4.58061	4.12634	4.36559	4.62338	4.65258	3.6419	4.73227	4.68414	4.56042	4.54479	4.134	4.70275	4.30407
ID357	4.19095	4.34881	4.66943	4.22061	4.52338	4.6292	4.61427	3.49554	4.62997	4.72095	4.55676	4.58074	4.44246	4.69331	4.04878
ID358	4.39121	4.36299	4.72481	4.08723	4.53444	4.6228	4.60666	3.64742	4.64465	4.76124	4.71019	4.6178	4.28829	4.76779	4.09709
ID359	4.33652	4.43489	4.56159	4.26651	4.40551	4.51365	4.54623	3.53896	4.64603	4.6755	4.55237	4.50575	4.39393	4.62693	4.15156
ID360	4.37003	4.50402	4.51758	4.13822	4.45106	4.5152	4.65973	3.72428	4.52315	4.62285	4.43423	4.53501	4.3036	4.67038	4.13918
ID361	4.29526	4.41587	4.5752	4.14689	4.37875	4.61056	4.53497	3.78282	4.76162	4.73026	4.61902	4.56142	4.20207	4.73203	4.27983
ID362	4.42397	4.39032	4.74798	4.32676	4.47044	4.72669	4.6426	3.63074	4.74926	4.84997	4.64878	4.72147	4.31104	4.80479	4.346
ID363	4.33915	4.33094	4.61282	4.25357	4.49014	4.64451	4.59797	3.52997	4.64383	4.72421	4.55991	4.68192	4.33102	4.73392	4.23176
ID364	4.41663	4.35901	4.54599	4.26778	4.44044	4.60066	4.61246	3.59386	4.54964	4.67761	4.46496	4.54392	4.21605	4.59382	4.31525
ID365	4.32394	4.34345	4.58236	4.20575	4.44796	4.56948	4.55573	3.61345	4.61912	4.68959	4.52609	4.49715	4.28638	4.62106	4.19377
ID366	4.3843	4.39267	4.60778	4.0009	4.40502	4.57107	4.48125	3.64886	4.66686	4.70806	4.57674	4.60794	4.24539	4.6668	4.0419
ID367	4.30425	4.31435	4.54664	4.07898	4.4092	4.60088	4.53717	3.6084	4.68906	4.68369	4.56427	4.45882	4.03532	4.6716	4.22162
ID368	4.2986	4.30113	4.54337	3.72082	4.41498	4.52648	4.42239	3.7332	4.66632	4.58043	4.51305	4.4876	3.92887	4.84375	3.97324
ID369	4.39477	4.16115	4.568	4.07795	4.3465	4.59174	4.47878	3.55853	4.68724	4.72021	4.66257	4.5093	4.12421	4.63955	4.22317
ID370	4.36841	4.45128	4.60357	4.34482	4.45943	4.65254	4.66061	3.66903	4.65999	4.74586	4.54517	4.55764	4.28525	4.7037	4.30062
ID371	4.38346	4.48507	4.71086	4.1025	4.56016	4.66124	4.67492	3.95864	4.66015	4.74383	4.5832	4.64456	4.29819	4.7856	4.07965
ID372	4.20663	4.26685	4.5638	4.1042	4.36559	4.60176	4.55649	3.60765	4.69018	4.7262	4.55886	4.54239	4.12912	4.72445	4.15317
ID373	4.32591	4.3013	4.62745	4.1436	4.46965	4.62565	4.57689	3.666	4.75669	4.73582	4.6733	4.56645	4.19902	4.81604	4.21675
ID374	4.39282	4.3133	4.59174	4.1806	4.4388	4.67105	4.58459	3.56767	4.62066	4.72067	4.51108	4.54381	4.13019	4.71998	4.27158
ID375	4.30732	4.25238	4.53288	4.07513	4.39817	4.50625	4.50448	3.77444	4.57896	4.68141	4.47225	4.55601	4.05478	4.6251	4.13534
ID376	4.2941	4.30441	4.66642	4.13514	4.48992	4.69483	4.55494	3.76878	4.68984	4.81491	4.63633	4.628	4.13606	4.78189	4.08142
ID377	4.2364	4.39692	4.5549	4.08472	4.48968	4.62091	4.57533	3.64993	4.65996	4.68782	4.58117	4.57515	4.00628	4.72166	4.16621
ID378	4.40261	4.3651	4.64325	4.0813	4.53652	4.6164	4.52369	3.76577	4.71372	4.72296	4.57629	4.62959	4.22371	4.77892	4.06235
ID379	4.33899	4.23348	4.47614	4.1349	4.31458	4.5878	4.50641	3.52304	4.69445	4.75417	4.55503	4.52431	4.12401	4.65425	4.21119
ID380	4.09179	4.26352	4.49256	4.09378	4.40323	4.50212	4.37747	3.47647	4.59141	4.61416	4.48312	4.47301	4.1343	4.59103	3.92279
ID381	4.30429	4.19951	4.55627	3.86099	4.44689	4.56582	4.48966	3.59994	4.63762	4.63778	4.57807	4.6045	3.99524	4.74628	4.04965
ID382	4.31005	4.43529	4.5696	4.0833	4.37913	4.65899	4.54603	3.6569	4.72164	4.70622	4.61606	4.56194	4.05518	4.66854	4.27624
ID383	4.31782	4.41556	4.6148	4.17433	4.52087	4.60352	4.59019	3.71053	4.63932	4.70501	4.50764	4.62838	4.23003	4.736	4.14508
ID384	4.19501	4.26837	4.57503	3.92542	4.31652	4.57854	4.52871	3.58783	4.704	4.66578	4.53827	4.56246	4.06329	4.79592	4.06955
ID385	4.37833	4.30237	4.55198	3.88387	4.44764	4.55955	4.53016	3.65986	4.6234	4.64049	4.51572	4.57572	3.98747	4.71428	4.05681
ID386	4.3626	4.36557	4.63127	4.29095	4.42796	4.62783	4.57404	3.57002	4.64411	4.73014	4.54456	4.56973	4.32892	4.68991	4.24776
ID387	4.20427	4.30623	4.4889	3.79541	4.54447	4.52886	4.5437	3.49125	4.60312	4.61333	4.44439	4.52266	3.81752	4.73022	3.89957
ID388	4.33883	4.41208	4.67293	4.04451	4.4779	4.66666	4.63586	3.71968	4.76539	4.7419	4.62492	4.59496	4.17879	4.79506	4.22076
ID389	4.29775	4.37057	4.56765	4.01904	4.35843	4.60326	4.50645	3.70119	4.71323	4.68353	4.5997	4.55745	4.15059	4.73351	4.1867
ID390	4.42748	4.39974	4.62154	4.36959	4.36191	4.58806	4.60133	3.65018	4.5341	4.74509	4.41123	4.53421	4.48724	4.64049	4.33609
ID391	4.35142	4.29701	4.59494	3.9154	4.54099	4.64979	4.62617	3.64767	4.70748	4.74383	4.57828	4.57767	3.87764	4.79262	4.06194
ID392	4.33991	4.29431	4.6115	4.02778	4.42661	4.61559	4.52104	3.65392	4.71992	4.71385	4.62987	4.53166	4.12869	4.70738	4.15009
ID393	NA	4.20597	4.42571	3.78482	4.45879	4.41666	4.47276	3.5047	4.52791	4.62512	4.33029	4.53109	3.69869	4.62345	3.72619
ID394	4.25662	4.31673	4.50817	3.77566	4.46434	4.56457	4.53385	3.72532	4.60431	4.59933	4.52849	4.6053	3.77419	4.77499	3.89041
ID395	4.31878	4.23629	4.49445	4.0348	4.408	4.55172	4.48002	3.60102	4.56212	4.64665	4.53572	4.47828	3.99407	4.57759	4.14269
ID396	4.26526	4.54954	4.54247	3.9618	4.22781	4.56744	4.54988	3.8595	4.66467	4.66339	4.48644	4.53664	4.05338	4.74245	4.24854
ID397	4.30334	4.29049	4.66899	4.10423	4.49281	4.66125	4.52687	3.70813	4.55519	4.68597	4.48044	4.56799	4.15237	4.63704	4.13165
ID398	4.13085	4.18041	4.43451	3.7252	4.45494	4.43681	4.43932	3.59477	4.54517	4.54272	4.44799	4.46226	3.85135	4.63092	3.84728
ID399	4.25978	4.20623	4.55651	4.1387	4.45472	4.66634	4.52815	3.542	4.57088	4.73112	4.56773	4.57577	3.91513	4.69789	4.18241
ID400	4.26094	4.22034	4.50512	3.94583	4.37682	4.53881	4.42327	3.52899	4.67307	4.64211	4.55	4.47049	3.87287	4.71442	4.11129
ID401	4.30007	4.3127	4.54072	4.08384	4.5772	4.54187	4.52972	3.57389	4.60074	4.64619	4.48837	4.47208	4.17252	4.70431	4.0108
ID402	4.09751	4.02679	4.53933	3.99263	4.54919	4.62238	4.55049	3.45226	4.5897	4.70993	4.53244	4.58111	3.88505	4.72094	3.9557
ID403	4.38345	4.33683	4.69877	4.1436	4.45551	4.69172	4.57206	3.60896	4.73949	4.79105	4.599	4.65058	4.25843	4.65975	4.26245
ID404	4.34016	4.22038	4.47471	4.04321	4.28757	4.4444	4.48269	3.50999	4.44102	4.60074	4.38726	4.48959	4.11406	4.41902	4.14501
ID405	4.19784	4.25718	4.61637	4.258	4.49081	4.6235	4.66396	3.58882	4.73097	4.76495	4.64173	4.62076	4.21692	4.84892	4.11309
ID406	4.31639	4.32877	4.64837	4.16916	4.49328	4.64292	4.61766	3.48307	4.77613	4.76334	4.53073	4.5852	4.31733	4.81069	4.23969
ID407	4.24049	4.12666	4.42334	3.86829	4.33896	4.41359	4.25988	3.53995	4.50279	4.51241	4.43747	4.48712	4.02191	4.48465	3.91963
ID408	4.36727	4.25184	4.44802	4.16587	4.40796	4.54615	4.4895	3.43376	4.50913	4.59911	4.44518	4.42354	4.16783	4.52011	4.27331
ID409	4.32794	4.30002	4.48666	3.73485	4.36795	4.53922	4.4287	3.75247	4.65926	4.61486	4.54667	4.54972	3.86475	4.70019	4.03124
ID410	4.26807	4.36946	4.6009	4.07185	4.4254	4.60431	4.5583	3.63831	4.76942	4.73065	4.57365	4.53763	4.17771	4.78012	4.13381
ID411	4.30614	4.24017	4.5752	4.1677	4.40498	4.59428	4.5248	3.49912	4.59764	4.66605	4.47617	4.52775	4.2408	4.61649	4.15915
ID412	4.35886	4.36215	4.50865	4.10291	4.4427	4.52499	4.43128	3.64168	4.6025	4.5801	4.51663	4.46999	4.23486	4.61289	4.14491
ID413	4.33031	4.37559	4.51947	3.97682	4.37283	4.51141	4.5055	3.70641	4.63376	4.61747	4.51138	4.51024	4.03046	4.73021	4.12471
ID414	4.31247	4.25323	4.5806	4.06571	4.44762	4.64808	4.5206	3.58759	4.69083	4.74511	4.57901	4.53659	4.06226	4.69247	4.22789
ID415	4.35249	4.51022	4.66371	3.91558	4.54068	4.63912	4.55851	NA	4.6622	4.70473	4.60698	4.62259	4.16341	4.79785	3.94965
ID416	4.35966	4.38225	4.61607	4.28392	4.42484	4.63512	4.62707	3.6904	4.68909	4.73429	4.52595	4.5855	4.22795	4.74918	4.293
ID417	4.34427	4.33761	4.57629	3.96048	4.40252	4.5319	4.47455	3.54216	4.6434	4.66951	4.39615	4.59988	4.11002	4.75292	4.0075
ID418	4.45255	4.23952	4.65254	4.05213	4.47669	4.72181	4.59404	3.61716	4.68218	4.73159	4.64835	4.59816	4.10103	4.7225	4.28502
ID419	4.30926	4.30797	4.51395	4.02383	4.3807	4.55081	4.54555	3.74016	4.61241	4.66524	4.51769	4.48835	3.938	4.67387	4.12378
ID420	4.32068	4.70939	4.5978	4.27321	4.44918	4.57293	4.60106	NA	4.63863	4.71678	4.45387	4.60393	4.3651	4.69972	4.18593
ID421	4.30413	4.43922	4.65063	4.2603	4.41996	4.61537	4.62519	3.71244	4.65829	4.71122	4.5435	4.59155	4.38366	4.7141	4.19806
ID422	4.41089	4.37555	4.52619	4.24763	4.45777	4.53569	4.54527	3.6284	4.59212	4.64674	4.49865	4.48415	4.21595	4.61486	4.23463
ID423	4.44586	4.44538	4.67918	4.15959	4.52751	4.61668	4.5903	3.63214	4.66527	4.75795	4.49503	4.57957	4.3002	4.72231	4.15302
ID424	4.27017	4.26057	4.52701	3.99621	4.36455	4.5667	4.49955	3.66446	4.66025	4.61328	4.57801	4.4923	4.07569	4.6657	4.15706
ID425	4.40905	4.31997	4.69313	3.92451	4.59534	4.71793	4.54812	3.69878	4.74764	4.78051	4.67329	4.6355	4.08733	4.80319	4.04881
ID426	4.44258	4.41689	4.62812	4.06118	4.56356	4.57778	4.57965	3.63683	4.57009	4.67871	4.48187	4.60124	4.29667	4.6898	4.08048
ID427	4.3674	4.27696	4.6062	4.00467	4.52411	4.63112	4.51682	3.81629	4.59362	4.74861	4.61628	4.62031	4.14774	4.68496	4.12405
ID428	4.43802	4.34209	4.61762	4.11126	4.37711	4.56156	4.55793	3.65765	4.53168	4.70137	4.50063	4.60065	4.2625	4.64389	4.18025
ID429	4.25613	4.22875	4.49423	3.51712	4.42445	4.45837	4.43289	3.64937	4.66969	4.60079	4.49025	4.65918	3.62992	4.7827	3.77788
ID430	4.30828	4.33664	4.54896	3.97607	4.42487	4.57261	4.48675	3.5768	4.72236	4.66192	4.53796	4.54185	4.08432	4.7131	4.06606
ID431	4.12293	4.42229	4.45327	4.16277	4.35843	4.48081	4.58835	3.76744	4.48389	4.56204	4.35285	4.42888	4.12136	4.64612	4.07415
ID432	4.30135	4.51632	4.61579	4.27275	4.46582	4.57687	4.63299	3.88857	4.63634	4.71392	4.50307	4.60117	4.2865	4.77203	4.23199
ID433	4.29505	4.4833	4.68329	4.24555	4.58423	4.7296	4.66409	3.77669	4.74598	4.80136	4.62263	4.54705	4.23832	4.75063	4.21989
ID434	4.18178	4.29882	4.5194	4.09065	4.48878	4.53239	4.4888	3.48118	4.65969	4.67677	4.45834	4.48943	4.14823	4.65447	4.06177
ID435	4.37727	4.35697	4.64086	4.06175	4.55901	4.7059	4.54096	3.74763	4.73234	4.79119	4.63437	4.60476	4.05287	4.72772	4.15651
ID436	4.31249	4.20264	4.55222	4.05519	4.44924	4.59698	4.50221	3.45534	4.6934	4.69646	4.59874	4.50014	4.04702	4.65326	4.15453
ID437	4.37006	4.36187	4.65857	4.14628	4.44407	4.69965	4.66248	3.57706	4.75376	4.78303	4.60981	4.60728	4.19182	4.76946	4.3044
ID438	4.35346	4.35309	4.68139	4.17973	4.52861	4.72561	4.6605	3.69969	4.7397	4.81085	4.68599	4.64222	4.30844	4.78814	4.21492
ID439	4.40984	4.25528	4.54031	3.88514	4.35948	4.53481	4.45947	3.62552	4.60656	4.63572	4.56017	4.58373	3.97328	4.71331	4.07549
ID440	4.42389	4.41213	4.62877	4.24924	4.37209	4.61829	4.64226	3.60364	4.63907	4.69013	4.56344	4.5725	4.36785	4.68305	4.31506
ID441	4.39364	4.2032	4.63012	4.17723	4.45087	4.71362	4.53957	3.51764	4.64495	4.80248	4.63063	4.64654	4.16476	4.63932	4.3434
ID442	4.37106	4.37416	4.52524	4.16226	4.30454	4.49742	4.4807	3.71847	4.57283	4.63443	4.43401	4.53832	4.24877	4.54271	4.19257
ID443	4.42117	4.35657	4.58427	3.96699	4.40693	4.5501	4.50556	3.63812	4.58223	4.67607	4.5355	4.60343	4.07299	4.65706	4.07548
ID444	4.33521	4.49119	4.66535	4.18101	4.46378	4.66936	4.58371	3.7859	4.74939	4.73795	4.62847	4.5898	4.21677	4.7765	4.20457
ID445	4.27653	4.4074	4.61568	4.29462	4.52258	4.61747	4.63751	3.6045	4.6903	4.72418	4.52591	4.55091	4.31756	4.71108	4.21626
ID446	4.31377	4.48167	4.466	4.00452	4.3304	4.54372	4.46074	3.82655	4.61974	4.6203	4.47004	4.43079	3.92053	4.51815	4.20682
ID447	4.23308	4.29595	4.52993	3.88275	4.29663	4.52922	4.51916	3.65002	4.64897	4.57144	4.50972	4.53603	3.95085	4.73079	4.08516
ID448	4.39316	4.22406	4.6011	3.76703	4.52726	4.58674	4.38337	3.57406	4.73046	4.6993	4.60962	4.60988	3.94691	4.69678	3.94823
ID449	4.22242	4.2345	4.62537	4.15749	4.37835	4.70878	4.59108	3.54611	4.70575	4.77264	4.59415	4.60838	4.17876	4.81225	4.20789
ID450	4.35108	4.49279	4.57072	4.13254	4.3824	4.52634	4.53748	3.76108	4.69093	4.64115	4.56952	4.5661	4.24797	4.6665	4.15202
ID451	4.27299	4.27784	4.47183	3.84801	4.36501	4.5808	4.52194	3.61522	4.61862	4.65866	4.55797	4.49862	3.79432	4.63345	4.10981
ID452	4.21606	4.15888	4.51171	3.9637	4.34112	4.53308	4.45615	3.45952	4.62191	4.66599	4.52942	4.50253	4.02098	4.61759	4.08312
ID453	4.28098	4.26237	4.60336	4.15385	4.45377	4.62615	4.5152	3.52908	4.64345	4.69032	4.56985	4.5156	4.17948	4.67968	4.18433
ID454	4.27106	4.23082	4.41934	3.95162	4.33085	4.49993	4.48724	3.60025	4.59708	4.60815	4.48819	4.4661	3.82036	4.54274	4.16402
ID455	4.44733	4.50085	4.66566	4.1686	4.46974	4.63362	4.60687	3.77218	4.72282	4.72083	4.61038	4.62051	4.19483	4.7766	4.26721
ID456	4.35406	4.36839	4.68524	4.11915	4.52577	4.72195	4.67663	3.66255	4.73751	4.818	4.65168	4.6199	4.12325	4.81959	4.16538
ID457	4.24127	4.15008	4.53224	3.96822	4.30259	4.52981	4.51311	3.46343	4.65444	4.67249	4.53972	4.52268	3.98173	4.65581	4.09765
ID458	4.11836	4.3649	4.59626	4.07592	4.48682	4.63944	4.57474	3.55948	4.71078	4.74737	4.5955	4.54229	4.12294	4.76357	4.07119
ID459	4.27328	4.31835	4.50737	3.89948	4.39616	4.56791	4.41397	3.76856	4.69172	4.6322	4.57673	4.55553	3.98715	4.71196	4.08086
ID460	4.22648	4.28669	4.51341	3.95346	4.42128	4.59959	4.52603	3.52312	4.69403	4.66291	4.62392	4.53417	3.88737	4.64164	4.16168
ID461	4.28962	4.25999	4.47396	4.11936	4.34995	4.49798	4.46944	3.60123	4.61789	4.64878	4.46453	4.42914	4.06807	4.59737	4.17342
ID462	4.3858	4.24507	4.6476	4.06903	4.53745	4.69633	4.57291	3.59362	4.7562	4.79378	4.68475	4.61501	4.25283	4.79015	4.2561
ID463	4.43238	4.10471	4.55733	3.76548	4.44453	4.60295	4.44033	3.4953	4.64293	4.6713	4.6254	4.60902	3.90242	4.66207	4.03532
ID464	4.35825	4.4064	4.52713	4.01816	4.40429	4.57595	4.52605	3.71269	4.65875	4.66517	4.56919	4.55812	3.90935	4.66292	4.23665
ID465	4.2125	4.17504	4.43629	3.44252	4.30241	4.35503	4.34387	3.63174	4.5857	4.48008	4.43295	4.52254	3.73483	4.70543	3.70032
ID466	4.05176	4.21509	4.35522	NA	4.5364	NA	NA	3.76608	4.41169	NA	4.33476	4.60674	NA	4.56368	NA
ID467	4.35779	4.37355	4.61902	4.1061	4.35372	4.62582	4.55549	3.59252	4.73163	4.75753	4.54992	4.56819	4.03563	4.69042	4.25365
ID468	4.37987	4.32838	4.70384	4.15968	4.42981	4.73553	4.70189	3.48742	4.72315	4.90232	4.64035	4.58269	4.19051	4.73797	4.28054
ID469	4.2497	4.35793	4.64253	4.22942	4.60392	4.74341	4.63114	3.74799	4.72003	4.78976	4.62335	4.56463	4.18209	4.7642	4.20238
ID470	4.28729	4.17808	4.60829	4.16006	4.34517	4.67153	4.62604	3.46288	4.68887	4.78016	4.6061	4.56985	4.13034	4.71596	4.28026
ID471	4.27209	4.32496	4.55387	4.01308	4.44695	4.53829	4.54349	3.67708	4.63349	4.66601	4.564	4.54014	4.07464	4.70252	4.16394
ID472	4.26535	4.36499	4.53911	4.11979	4.43816	4.60868	4.51881	3.68493	4.66681	4.68944	4.59498	4.52068	4.01526	4.65804	4.22679
ID473	4.18541	4.26367	4.53075	4.1855	4.46839	4.61412	4.60187	3.639	4.66962	4.77316	4.59486	4.58011	3.97198	4.72641	4.15893
ID474	4.33843	4.20673	4.59705	4.09094	4.45795	4.6951	4.53247	3.35683	4.68622	4.76834	4.59439	4.57505	4.09294	4.66935	4.21643
ID475	4.37151	4.29574	4.63179	4.16732	4.35646	4.6396	4.52493	3.54615	4.68667	4.7544	4.60291	4.51712	4.17207	4.67463	4.25536
ID476	4.18269	4.22957	4.53397	4.18494	4.44693	4.55974	4.42606	3.42034	4.59734	4.63869	4.49794	4.48029	4.18542	4.54045	4.11444
ID477	4.38418	4.46113	4.52127	4.24451	4.44171	4.50102	4.57747	3.65138	4.59559	4.65367	4.45334	4.4784	4.30481	4.64942	4.26774
ID478	4.29713	4.38751	4.60119	4.16909	4.52287	4.70305	4.68682	3.73363	4.65669	4.7856	4.6322	4.60449	3.94113	4.81115	4.2157
ID479	4.44208	4.20648	4.61622	3.91423	4.42388	4.63721	4.55454	3.58488	4.70515	4.71258	4.59114	4.56454	4.07476	4.73984	4.10247
ID480	4.25711	4.36012	4.58992	4.20118	4.51117	4.61166	4.59363	3.6241	4.60144	4.72135	4.48992	4.45784	4.22574	4.68832	4.08576
ID481	4.30789	4.30833	4.58386	3.8354	4.40954	4.53642	4.44256	3.69717	4.72693	4.62956	4.59627	4.61251	4.06852	4.77187	3.99788
ID482	4.37324	4.2581	4.659	3.93377	4.57164	4.61066	4.55285	3.42387	4.6681	4.72342	4.48042	4.56066	4.13056	4.67145	3.94185
ID483	4.34092	4.36374	4.65689	4.1909	4.52488	4.67655	4.62211	3.52193	4.66156	4.78432	4.47028	4.59996	4.2033	4.71357	4.19581
ID484	4.25439	4.31441	4.60318	4.04094	4.38416	4.65237	4.57069	3.56657	4.6952	4.70476	4.58412	4.54341	4.14935	4.77445	4.1796
ID485	4.50979	4.47385	4.64344	4.22589	4.54339	4.66984	4.66821	3.73556	4.68932	4.76909	4.56975	4.6403	4.34983	4.73047	4.25021
ID486	4.34017	4.54632	4.56378	4.20543	4.34694	4.5326	4.5844	3.79892	4.59936	4.6416	4.50612	4.55585	4.28059	4.66491	4.21286
ID487	4.25643	4.32528	4.42076	3.85169	4.39981	4.58399	4.48457	3.73445	4.71627	4.65888	4.57015	4.5747	3.95932	4.79535	4.03046
ID488	4.3823	4.32346	4.67785	4.16973	4.42356	4.67438	4.67936	3.66228	4.75832	4.78939	4.62942	4.6578	4.20803	4.8449	4.26286
ID489	4.35234	4.3383	4.62926	4.06719	4.41842	4.72251	4.60729	3.6339	4.72734	4.82312	4.64306	4.56557	4.03074	4.71987	4.27391
ID490	4.33157	4.36127	4.60817	4.1781	4.44523	4.65124	4.57602	3.68538	4.74065	4.74706	4.62136	4.56748	4.19395	4.70811	4.26139
ID491	4.3581	4.28203	4.6373	3.96291	4.50018	4.64318	4.48564	3.56556	4.80143	4.76903	4.65029	4.61448	4.16686	4.73749	4.12338
ID492	4.28552	4.2915	4.55014	4.09237	4.42213	4.58665	4.51474	3.62318	4.60428	4.64829	4.57624	4.49256	4.10348	4.66979	4.1782
ID493	4.4395	4.45571	4.67903	4.18108	4.41701	4.63386	4.58267	3.76298	4.76396	4.76378	4.62322	4.6055	4.21617	4.72663	4.3055
ID494	4.25932	4.21399	4.59505	4.14177	4.36816	4.65207	4.53464	3.49359	4.6472	4.7593	4.55989	4.57827	4.02899	4.7067	4.18706
ID495	4.31337	4.33879	4.62328	4.16727	4.54155	4.73661	4.61712	3.66182	4.73651	4.79951	4.60566	4.54565	4.15752	4.77668	4.23494
ID496	4.19416	4.3413	4.55246	4.10026	4.42204	4.62741	4.53834	3.60237	4.6932	4.68912	4.54079	4.49408	4.10237	4.72225	4.18727
ID497	4.28491	4.16878	4.50844	NA	4.51385	4.31244	4.20425	3.7185	4.47091	4.41478	4.44522	4.65451	3.51044	4.68783	NA
ID498	4.3456	4.15384	4.65259	4.13602	4.50905	4.65966	4.46381	3.47826	4.63554	4.79681	4.56981	4.58382	4.27173	4.63257	4.06521
ID499	4.39969	4.22282	4.52114	4.037	4.40648	4.60211	4.49597	3.59796	4.67773	4.69098	4.6112	4.51715	4.01899	4.63919	4.25182
ID500	4.02865	4.20255	4.44417	4.08915	4.40876	4.55023	4.54327	3.58072	4.60989	4.7104	4.53368	4.50219	3.83419	4.64659	3.98933
ID501	4.32786	4.52779	4.63262	3.9799	4.50354	4.62296	4.57301	4.09864	4.62888	4.72084	4.59582	4.63459	4.1536	4.725	3.97078
ID502	4.38376	4.35088	4.63806	4.10813	4.45696	4.67443	4.58014	3.57708	4.69759	4.72466	4.60033	4.58783	4.17808	4.76934	4.2424
ID503	4.35195	4.35771	4.52317	3.88017	4.39574	4.57702	4.46828	3.62754	4.69839	4.66264	4.64228	4.47728	4.0327	4.64044	4.11269
ID504	4.23129	4.24258	4.50078	3.92684	4.31796	4.48486	4.47998	3.67819	4.58918	4.59707	4.57185	4.46748	4.05295	4.65338	4.09985
ID505	4.30443	4.14555	4.59608	4.22851	4.45511	4.66353	4.52507	3.38809	4.71516	4.82651	4.54549	4.66124	4.07731	4.73792	4.19178
ID506	4.3897	4.36794	4.4698	4.12572	4.41676	4.50489	4.48393	3.6479	4.56494	4.58033	4.54275	4.47729	4.29421	4.64201	4.18975
ID507	4.27193	4.49741	4.5435	4.2615	4.42705	4.53188	4.53732	3.76545	4.65341	4.62598	4.56048	4.51416	4.29879	4.6425	4.18409
ID508	4.22929	4.16159	4.49858	4.12094	4.33454	4.5823	4.49475	3.55674	4.63793	4.65743	4.49794	4.50382	4.05372	4.66536	4.2048
ID509	4.27397	4.28379	4.55624	3.80287	4.60071	4.58443	4.45562	3.61577	4.63725	4.67626	4.56118	4.56013	3.98423	4.71565	3.93603
ID510	4.29143	4.28292	4.50673	4.14959	4.36134	4.51299	4.44025	3.5327	4.55483	4.59526	4.4777	4.4895	4.19726	4.62096	4.15985
ID511	4.33874	4.21966	4.51912	3.77382	4.43268	4.5523	4.40642	3.75059	4.64957	4.62676	4.57264	4.58688	3.8323	4.66882	3.99512
ID512	4.20504	4.26049	4.51213	4.09864	4.41134	4.56988	4.49959	3.37288	4.62257	4.70895	4.44334	4.53227	4.00791	4.68724	4.11531
ID513	4.29765	4.39959	4.55448	4.19125	4.43068	4.64538	4.62717	3.80179	4.65391	4.72296	4.55457	4.52067	4.14341	4.64753	4.29276
ID514	4.21381	4.17285	4.4513	3.84242	4.47808	4.56464	4.45096	3.61929	4.65021	4.62195	4.56148	4.50274	3.67789	4.69455	4.0275
ID515	4.3371	4.41744	4.62988	4.18842	4.47603	4.65492	4.61271	3.67104	4.65992	4.73616	4.56528	4.60088	4.30601	4.69487	4.12999
ID516	4.25348	4.3575	4.54269	4.06813	4.41432	4.58773	4.62101	3.70098	4.71553	4.68523	4.57335	4.54907	4.1544	4.76113	4.17518
ID517	4.33127	4.45867	4.59472	4.20163	4.45129	4.57112	4.63922	3.65409	4.61315	4.68229	4.4587	4.58115	4.27487	4.69313	4.1721
ID518	4.35547	4.29034	4.58606	4.13621	4.47692	4.64271	4.59869	3.63363	4.71765	4.7597	4.64708	4.57503	4.10899	4.74663	4.25148
ID519	4.42169	4.32965	4.67493	4.18882	4.42207	4.71136	4.64133	3.50743	4.80314	4.84671	4.65699	4.59091	4.30301	4.7132	4.38068
ID520	4.30223	4.33445	4.54819	4.17335	4.43267	4.54009	4.53306	3.53053	4.56562	4.65139	4.52027	4.55107	4.24984	4.65588	4.16842
ID521	4.33605	4.52983	4.58489	4.00596	4.47826	4.605	4.61168	3.7817	4.69247	4.68971	4.58317	4.54438	3.95774	4.71601	4.1601
ID522	4.35109	4.39536	4.53485	4.09336	4.27563	4.57723	4.51233	3.6928	4.71543	4.69036	4.56729	4.57986	4.00425	4.70087	4.26771
ID523	4.32779	4.27792	4.61133	3.93036	4.4861	4.59893	4.5088	3.60262	4.67206	4.68837	4.58149	4.57422	4.10555	4.73214	4.04533
ID524	4.204	4.37763	4.48644	4.07405	4.33033	4.55842	4.60998	3.76206	4.72413	4.71905	4.4934	4.58301	3.84091	4.71792	4.1751
ID525	4.0572	4.17291	4.4839	4.14197	4.43104	4.54265	4.53566	3.54131	4.63141	4.69711	4.49893	4.52079	3.972	4.67233	4.02129
ID526	4.31659	4.5593	4.71785	4.24969	4.48722	4.71394	4.73968	3.81101	4.77938	4.79374	4.59871	4.61165	4.19904	4.85773	4.28047
ID527	4.33223	4.45093	4.66298	3.96809	4.41115	4.56219	4.58185	3.78202	4.77202	4.72025	4.63869	4.60331	4.15715	4.73006	4.12135
ID528	4.35513	4.4199	4.54579	3.95726	4.27933	4.57633	4.55556	3.78927	4.64676	4.63233	4.49561	4.4902	4.15212	4.70509	4.22199
ID529	4.45399	4.37576	4.63529	4.21121	4.54728	4.66205	4.55198	3.55122	4.67093	4.74374	4.61488	4.59751	4.22873	4.64822	4.30013
ID530	4.36493	4.27099	4.57385	4.00371	4.4258	4.55486	4.46572	3.57024	4.662	4.67454	4.57231	4.51231	4.12581	4.63079	4.07855
ID531	4.1154	4.12898	4.2922	NA	4.32505	4.24973	4.26863	3.63829	4.39448	NA	4.32572	4.44483	3.49145	4.62191	NA
ID532	4.27087	4.35646	4.61574	4.23088	4.43163	4.70743	4.55597	3.52286	4.6672	4.78479	4.57431	4.53875	4.05128	4.66807	4.24853
ID533	4.42657	4.28972	4.56634	3.99748	4.40318	4.58802	4.51845	3.63738	4.67832	4.68372	4.6631	4.509	4.04558	4.6972	4.22651
ID534	4.36799	4.27761	4.63549	4.03029	4.3801	4.59655	4.55627	3.48907	4.75513	4.78554	4.56693	4.55286	4.08671	4.66935	4.22251
ID535	4.25982	4.29957	4.43212	4.00227	4.35105	4.50466	4.45648	3.66776	4.5333	4.5812	4.48291	4.43033	3.96492	4.56235	4.08955
ID536	4.03955	4.17677	4.35567	3.96044	4.2725	4.38475	4.4743	3.65617	4.5931	4.60398	4.42658	4.46375	3.74085	4.67026	3.96524
ID537	4.29865	4.26912	4.63097	4.12864	4.45386	4.62964	4.51348	3.51901	4.68855	4.75135	4.6317	4.58114	4.14238	4.66486	4.1139
ID538	4.40896	4.31028	4.5686	3.70979	4.53064	4.60863	4.45508	3.70592	4.70882	4.67359	4.64392	4.57525	3.90062	4.70388	4.00599
ID539	4.37552	4.32927	4.52099	4.05219	4.40017	4.61543	4.53652	3.62374	4.58957	4.68656	4.57317	4.50845	3.96657	4.6239	4.27289
ID540	4.41798	4.31533	4.57629	3.84322	4.51273	4.60265	4.49638	3.69262	4.71109	4.67232	4.61745	4.57792	3.9383	4.73869	4.0876
ID541	4.31009	4.43254	4.654	4.22769	4.33385	4.7104	4.66748	3.61136	4.74484	4.80916	4.58966	4.59673	4.14694	4.76895	4.34927
ID542	4.2723	4.36384	4.54273	4.04836	4.37464	4.61988	4.55484	3.65023	4.73516	4.707	4.60053	4.51566	4.06318	4.67992	4.22232
ID543	4.21375	4.28456	4.53639	3.82472	4.52102	4.59993	4.49836	3.73781	4.65247	4.67609	4.59019	4.57202	4.01085	4.72761	3.9735
ID544	4.21527	4.29826	4.52793	4.12176	4.37584	4.56172	4.5736	3.60017	4.67006	4.68499	4.56026	4.44496	4.06064	4.59117	4.17055
ID545	4.23828	4.38923	4.5561	3.99764	4.40255	4.61506	4.64688	3.45151	4.66906	4.74922	4.44923	4.40406	3.76228	4.7525	4.13781
ID546	4.4539	4.38946	4.64975	4.06895	4.5117	4.73078	4.61477	3.66112	4.77793	4.83774	4.69468	4.67363	4.19411	4.79901	4.32184
ID547	4.3072	4.43739	4.65849	4.26512	4.52316	4.7274	4.63625	3.67447	4.77874	4.84871	4.67419	4.56644	4.29811	4.76297	4.32636
ID548	4.36039	4.40369	4.63522	4.18177	4.50591	4.64527	4.58873	3.6793	4.69866	4.76118	4.58393	4.55515	4.18477	4.67272	4.2251
ID549	4.13331	4.31965	4.54259	3.92423	4.32763	4.48365	4.4504	3.61345	4.6467	4.64514	4.52198	4.52247	4.00999	4.74884	4.00474
ID550	4.32553	4.42066	4.5672	4.18806	4.35093	4.57749	4.57199	3.67998	4.65042	4.70507	4.40953	4.55942	4.05004	4.69748	4.26223
ID551	3.94998	4.16337	4.22636	NA	4.65949	NA	4.22945	3.75195	NA	NA	4.26801	4.58577	NA	4.62354	NA
ID552	4.30228	4.34411	4.53779	4.07574	4.44415	4.60723	4.51558	3.79464	4.60146	4.70843	4.60028	4.50735	4.01179	4.64819	4.15666
ID553	4.38043	4.33432	4.57963	4.15561	4.43244	4.66033	4.54893	3.62796	4.76232	4.73271	4.62057	4.57668	4.19975	4.723	4.33193
ID554	4.30416	4.22079	4.56906	4.17466	4.52324	4.64382	4.58712	3.42574	4.65881	4.73595	4.52101	4.5787	3.99744	4.69715	4.25767
ID555	4.26374	4.25534	4.55567	4.15473	4.42929	4.57333	4.55571	3.51599	4.67498	4.73415	4.44983	4.63233	4.0295	4.73664	4.1553
ID556	4.39527	4.38441	4.66365	4.13176	4.47269	4.74068	4.59748	3.55166	4.71197	4.82108	4.63293	4.64134	4.1744	4.75358	4.33758
ID557	4.38292	4.42097	4.50444	4.18635	4.3666	4.48321	4.53178	3.62712	4.56699	4.6371	4.5038	4.50239	4.26768	4.5756	4.21884
ID558	4.40874	4.39247	4.59787	4.01136	4.48884	4.63996	4.54426	3.6752	4.64572	4.7607	4.48135	4.72299	4.10307	4.76615	4.05562
ID559	4.24484	4.29581	4.4493	4.0027	4.32216	4.56236	4.50412	3.56364	4.59033	4.64074	4.5227	4.37874	3.86054	4.59295	4.14218
ID560	4.26249	4.36948	4.56226	3.88074	4.38355	4.52025	4.45252	3.71985	4.60938	4.621	4.52472	4.53805	4.06324	4.64003	3.97651
ID561	4.19303	4.30579	4.50635	4.08467	4.40859	4.55265	4.50663	3.55491	4.65464	4.66484	4.5534	4.43727	4.02931	4.63104	4.13465
ID562	4.35474	4.41178	4.61593	4.20562	4.46055	4.60525	4.44204	3.6707	4.64763	4.7038	4.49339	4.5584	4.16753	4.69449	4.23627
ID563	4.30275	4.42164	4.59864	4.23146	4.38122	4.5676	4.55896	3.72094	4.62275	4.69717	4.53133	4.54231	4.33496	4.66721	4.17733
ID564	4.2271	4.29396	4.47149	4.09619	4.32416	4.53988	4.59932	3.58231	4.63737	4.63755	4.52482	4.46064	4.02547	4.60231	4.17513
ID565	4.16249	4.2853	4.49505	4.07135	4.34087	4.59475	4.54528	3.57674	4.68344	4.70452	4.53323	4.54471	3.8263	4.67663	4.11438
ID566	4.23638	4.44382	4.47397	3.964	4.33382	4.5601	4.51007	3.59956	4.58952	4.68569	4.53921	4.4615	3.88186	4.61976	4.12786
ID567	4.28427	4.27316	4.50883	3.90704	4.40501	4.56396	4.4417	3.58909	4.61354	4.64759	4.54484	4.54343	3.90802	4.64932	4.07815
ID568	4.48136	4.30348	4.62576	4.12874	4.46619	4.61087	4.58492	3.63623	4.70265	4.73817	4.61166	4.64589	4.19358	4.72255	4.25645
ID569	4.2274	4.20167	4.58197	4.10112	4.41222	4.61931	4.58341	3.50421	4.70252	4.76763	4.5636	4.62277	3.88425	4.7359	4.17915
ID570	4.33452	4.33374	4.56213	4.15249	4.29172	4.53939	4.52464	3.66312	4.67136	4.69038	4.55355	4.52598	4.05735	4.6636	4.1901
ID571	4.23986	4.2615	4.46587	4.07727	4.45667	4.46668	4.40585	3.52176	4.56232	4.5639	4.46707	4.44243	4.14152	4.56053	4.03338
ID572	4.44582	4.3046	4.68474	4.16257	4.53682	4.73666	4.71358	3.61415	4.64592	4.85303	4.57206	4.7178	4.17257	4.7485	4.3232
ID573	4.36515	4.23461	4.57563	4.17137	4.40161	4.61206	4.48284	3.49879	4.68174	4.73719	4.57527	4.50571	4.17498	4.64412	4.27886
ID574	4.26699	4.21337	4.51949	4.09998	4.3626	4.58815	4.56604	3.50049	4.65956	4.70851	4.52114	4.49717	4.00607	4.66075	4.17423
ID575	4.16067	4.27547	4.48332	3.71651	4.4018	4.51311	4.42181	3.67908	4.61763	4.59995	4.47854	4.50433	3.80604	4.67037	3.93206
ID576	4.18581	4.3582	4.55279	3.9503	4.47272	4.5697	4.51665	3.59691	4.64257	4.67352	4.57215	4.51269	4.09261	4.63115	3.97836
ID577	4.17695	4.41216	4.32763	3.6074	4.37853	4.25625	4.33652	3.71164	4.43522	4.33726	4.29649	4.39762	3.90714	4.56492	3.68223
ID578	4.46771	4.48891	4.69059	4.36773	4.57706	4.69982	4.68726	3.66198	4.77854	4.82958	4.67034	4.63014	4.35645	4.73364	4.36226
ID579	4.34984	4.30602	4.58295	4.0238	4.33956	4.61985	4.53431	3.69078	4.66188	4.68739	4.58194	4.53617	4.04068	4.72979	4.19486
ID580	4.16836	4.31815	4.47112	4.05158	4.34162	4.51418	4.51438	3.5896	4.61782	4.61949	4.4361	4.38982	4.10718	4.65389	4.14508
ID581	4.23959	4.38687	4.51688	4.21733	4.50503	4.58505	4.53501	3.6216	4.6158	4.6672	4.52312	4.47058	4.23913	4.6437	4.12188
ID582	4.26938	4.42161	4.65265	4.13943	4.42805	4.73365	4.65406	3.68512	4.80407	4.79673	4.59788	4.63163	4.17965	4.8331	4.23541
ID583	4.23482	4.50837	4.60676	4.22444	4.52627	4.61174	4.66289	3.70242	4.64817	4.74043	4.5152	4.38053	4.18754	4.74397	4.15322
ID584	4.29894	4.29539	4.59427	4.06345	4.40833	4.64687	4.56941	3.59833	4.69122	4.7315	4.58063	4.58267	4.11724	4.75047	4.2485
ID585	4.30797	4.28051	4.53244	3.99834	4.45831	4.56057	4.48773	3.58968	4.69302	4.63363	4.55689	4.51811	3.92241	4.68494	4.10001
ID586	4.41094	4.29263	4.73056	4.12063	4.613	4.75367	4.56626	3.57161	4.71132	4.81976	4.66959	4.68699	4.22836	4.81815	4.12361
ID587	4.39068	4.46723	4.68272	4.20343	4.5575	4.73245	4.66447	3.72655	4.68481	4.80265	4.62199	4.64113	4.27032	4.78762	4.2948
ID588	4.33701	4.33419	4.52892	3.96665	4.51946	4.55368	4.45174	3.68549	4.58796	4.60278	4.52322	4.57227	4.08032	4.71937	4.03785
ID589	4.22418	4.42729	4.60282	4.18173	4.5153	4.67546	4.61363	3.65371	4.68318	4.73079	4.59186	4.54145	4.1669	4.74757	4.18024
ID590	4.29013	4.40408	4.57424	3.99816	4.4424	4.58347	4.5555	3.69038	4.63084	4.70146	4.51302	4.61	4.00751	4.72663	4.1508
ID591	4.36395	4.37816	4.54051	4.06094	4.62576	4.55721	4.55624	3.68	4.56995	4.6537	4.51873	4.5651	4.1025	4.67957	4.05477
ID592	4.31699	4.30652	4.66989	4.1383	4.46876	4.694	4.62942	3.60829	4.67753	4.78244	4.56563	4.56406	4.26549	4.85369	4.25096
ID593	4.20623	4.30588	4.55147	3.71112	4.59235	4.58234	4.42966	3.63975	4.63542	4.66121	4.61872	4.59502	3.88034	4.68797	3.85624
ID594	4.2395	4.28587	4.51667	4.22435	4.44373	4.52491	4.55911	3.45574	4.5758	4.59773	4.44591	4.50942	4.29902	4.67	4.14127
ID595	4.38805	4.33083	4.64338	4.19262	4.46654	4.66474	4.51568	3.51773	4.78158	4.773	4.66796	4.51616	4.34412	4.699	4.24328
ID596	4.17601	4.38583	4.4983	4.2386	4.33574	4.50477	4.51019	3.6969	4.49196	4.64116	4.43781	4.43938	4.24401	4.61889	4.11766
ID597	4.24893	4.31578	4.52228	3.92495	4.3906	4.61232	4.5676	3.60171	4.66372	4.69586	4.58742	4.53363	3.96142	4.73198	4.16013
ID598	4.40627	4.37967	4.56647	4.3355	4.43333	4.59713	4.52649	3.60212	4.63817	4.70373	4.55576	4.5509	4.38649	4.56787	4.33725
ID599	4.31837	4.33595	4.47825	4.04398	4.3539	4.53818	4.58002	3.66884	4.64471	4.71211	4.48333	4.53889	3.72947	4.68228	4.23351
ID600	4.26907	4.364	4.64058	4.01749	4.47704	4.66065	4.52424	3.57917	4.73462	4.75351	4.6398	4.62722	4.18016	4.73582	4.09567
ID601	4.41456	4.36946	4.65657	4.07827	4.52227	4.71973	4.59576	3.62561	4.71921	4.79673	4.60712	4.70092	4.07917	4.77723	4.23643
ID602	4.31643	4.22864	4.53597	3.90178	4.40967	4.55786	4.49836	3.71517	4.60777	4.69377	4.50408	4.47128	3.88109	4.6547	4.04586
ID603	4.30195	4.41586	4.51958	4.11882	4.38295	4.54531	4.49451	3.88474	4.59084	4.65882	4.52953	4.52916	4.11145	4.62185	4.13904
ID604	4.33802	4.37309	4.62515	4.16726	4.43864	4.70869	4.62881	3.69305	4.66397	4.76839	4.56432	4.58512	4.09275	4.73086	4.29636
ID605	4.35761	4.34277	4.46482	4.36548	4.42975	4.6997	4.57705	3.63221	4.69941	4.79602	4.62487	4.63663	4.26894	4.74206	4.26127
ID606	4.27251	4.31949	4.51233	4.15505	4.33629	4.5389	4.52116	3.49369	4.57421	4.61412	4.4423	4.46355	4.18833	4.60673	4.18831
ID607	4.41378	4.43929	4.62352	4.26965	4.4681	4.59052	4.59827	3.6448	4.62989	4.69372	4.61134	4.58541	4.35221	4.6708	4.2782
ID608	4.4217	4.37911	4.61412	4.10076	4.4811	4.66397	4.60786	3.71501	4.7001	4.77406	4.64155	4.61889	4.06204	4.74784	4.26911
ID609	4.30573	4.35774	4.61741	4.13201	4.37483	4.64586	4.64564	3.60819	4.71225	4.76679	4.5791	4.53393	4.16647	4.76973	4.27074
ID610	4.3175	4.33312	4.5783	4.11953	4.45299	4.5919	4.53526	3.60392	4.70368	4.71308	4.58212	4.46916	4.25341	4.66891	4.21983
ID611	4.37224	4.32601	4.5325	3.98584	4.39194	4.51463	4.44372	3.53304	4.66595	4.65844	4.49935	4.47267	4.07336	4.49578	4.14423
ID612	4.35719	4.27423	4.60698	4.16431	4.46617	4.66564	4.5724	3.51882	4.7146	4.72661	4.63298	4.5641	4.04899	4.72378	4.27638
ID613	4.45708	4.46817	4.59556	4.19261	4.4318	4.62745	4.6194	3.79676	4.69903	4.72893	4.61485	4.63229	4.19398	4.73963	4.33302
ID614	4.33877	4.37342	4.58005	4.1123	4.36433	4.64197	4.55758	3.59741	4.72794	4.75438	4.59482	4.56805	4.12726	4.71229	4.31151
ID615	4.22222	4.31919	4.49648	3.97863	4.29742	4.52457	4.45142	3.63203	4.7079	4.66684	4.54617	4.50841	4.02243	4.68131	4.03507
ID616	4.33469	4.36462	4.60844	4.2808	4.42594	4.65053	4.58841	3.60884	4.59923	4.74514	4.57509	4.54446	4.36094	4.64503	4.23292
ID617	4.08705	4.26758	4.55782	4.14613	4.47952	4.62025	4.59091	3.50934	4.66534	4.745	4.57038	4.54282	3.98375	4.71504	4.04749
ID618	4.27847	4.47998	4.59908	4.26876	4.39837	4.64452	4.63195	4.00047	4.62288	4.75115	4.59696	4.58283	4.18016	4.72793	4.22124
ID619	4.3655	4.37872	4.70259	4.24341	4.42454	4.72782	4.55085	3.66834	4.73649	4.74793	4.60527	4.63006	4.36649	4.82668	4.3141
ID620	4.31783	4.262	4.5519	4.17506	4.30382	4.49246	4.46472	3.4293	4.56931	4.57618	4.43331	4.47705	4.33384	4.66419	4.23597
ID621	4.34788	4.42358	4.64307	4.03339	4.71092	4.69064	4.68089	3.82341	4.71058	4.746	4.6104	4.64486	4.02095	4.82889	4.12998
ID622	4.41889	4.49226	4.64844	4.12056	4.49426	4.69667	4.58803	3.93721	4.74893	4.77501	4.63052	4.62019	4.10842	4.77051	4.27981
ID623	4.30975	4.34417	4.52086	4.07733	4.48729	4.50068	4.51387	3.54328	4.58392	4.61341	4.55757	4.4798	4.19365	4.61928	4.08448
ID624	4.33	4.29215	4.61461	3.76714	4.52516	4.57225	4.51262	3.66871	4.65485	4.66491	4.51119	4.67633	4.01242	4.78755	3.90717
ID625	4.23618	4.21223	4.54561	3.97884	4.41026	4.56998	4.52728	3.50649	4.60827	4.66929	4.55613	4.49526	3.98387	4.63689	4.08591
ID626	4.19005	4.31418	4.50443	4.07825	4.36655	4.61189	4.54735	3.75405	4.62822	4.69696	4.5699	4.53929	3.84491	4.68994	4.13115
ID627	4.24011	4.26966	4.55128	4.13889	4.46689	4.62543	4.62363	3.5011	4.69137	4.75551	4.5689	4.56193	3.98947	4.7056	4.17665
ID628	4.23828	4.2987	4.47871	4.09415	4.38855	4.51732	4.46272	3.63975	4.62465	4.68087	4.52446	4.4396	3.94914	4.55957	4.14739
ID629	4.22942	4.3106	4.57421	4.09255	4.31171	4.57707	4.53036	3.45188	4.66732	4.70119	4.5564	4.51353	4.07123	4.68073	4.17338
ID630	4.31787	4.30843	4.62199	4.17846	4.47162	4.65089	4.57708	3.58453	4.69893	4.77019	4.61831	4.58148	4.14987	4.72332	4.19084
ID631	4.22082	4.38072	4.62945	4.21126	4.57381	4.7126	4.66528	3.82752	4.74317	4.79588	4.67696	4.65201	4.24953	4.81146	4.21763
ID632	4.33484	4.225	4.57591	3.9736	4.46381	4.65852	4.52936	3.6011	4.7123	4.74583	4.61005	4.52601	3.93092	4.72324	4.13374
ID633	4.32021	4.35348	4.63113	3.74677	4.52123	4.62896	4.51073	3.77304	4.6465	4.72805	4.55037	4.68735	3.95847	4.7757	3.9387
ID634	4.31801	4.28439	4.39126	3.54163	4.26428	4.42422	4.46515	3.71412	4.53516	4.48462	4.44224	4.50159	3.60265	4.6711	3.93069
ID635	4.2521	4.17607	4.42637	3.67205	4.48457	4.48028	4.39639	3.63897	4.58674	4.62231	4.5391	4.57104	3.66035	4.63801	3.86223
ID636	4.33117	4.42178	4.63863	4.25342	4.44773	4.70652	4.65602	3.66847	4.77067	4.83223	4.63605	4.61619	4.24464	4.776	4.34374
ID637	4.31093	4.38445	4.56943	4.10942	4.37186	4.52963	4.49214	3.67518	4.61401	4.60618	4.51904	4.58369	4.26072	4.684	4.11904
ID638	4.27088	4.23689	4.45426	4.03245	4.38598	4.53251	4.46167	3.48694	4.56551	4.62763	4.4738	4.45114	3.90742	4.61095	4.16902
ID639	4.33197	4.28213	4.57059	3.72692	4.52055	4.53382	4.47926	3.66459	4.69597	4.67074	4.485	4.63801	3.89596	4.77195	3.90323
ID640	4.27272	4.24885	4.65027	3.97041	4.57296	4.66587	4.53099	3.59115	4.72663	4.74943	4.6437	4.62851	4.1114	4.72378	4.02366
ID641	4.36867	4.42783	4.6222	4.20963	4.33476	4.63968	4.62279	3.67184	4.77624	4.77747	4.60564	4.5591	4.109	4.78348	4.32172
ID642	4.29592	4.11113	4.45804	3.58219	4.35731	4.50933	4.42184	3.50506	4.63063	4.58671	4.5068	4.58935	3.56023	4.58256	3.88075
ID643	4.36625	4.36813	4.55042	4.16104	4.37366	4.51015	4.54611	3.67063	4.657	4.63954	4.54946	4.52657	4.25109	4.65375	4.15937
ID644	4.41476	4.48085	4.76551	4.25368	4.35587	4.74084	4.699	3.64948	4.80265	4.79286	4.63676	4.69403	4.17276	4.84789	4.43287
ID645	4.33596	4.31088	4.58752	4.12073	4.42482	4.63045	4.44	3.66329	4.7111	4.74647	4.52492	4.57588	4.15065	4.70972	4.20045
ID646	4.2671	4.29489	4.49293	3.94583	4.29091	4.57929	4.55593	3.61846	4.64779	4.67647	4.57849	4.49986	3.77092	4.65737	4.16714
ID647	4.42507	4.58221	4.6821	4.28311	4.57268	4.70374	4.63876	3.83665	4.79146	4.83336	4.68192	4.6361	4.23115	4.74464	4.36658
ID648	4.3363	4.33052	4.58724	4.24584	4.42878	4.62644	4.58291	3.56553	4.64481	4.73385	4.55442	4.47499	4.11351	4.64075	4.32907
ID649	4.24929	4.29879	4.52759	4.04122	4.41328	4.62217	4.56188	3.54099	4.72504	4.7325	4.60617	4.57161	4.09735	4.76096	4.17628
ID650	4.3811	4.35362	4.60302	4.26513	4.39393	4.61498	4.48199	3.62818	4.66017	4.70515	4.56153	4.53989	4.30357	4.63631	4.25965
ID651	4.30906	4.32301	4.50592	3.99176	4.36328	4.60037	4.51356	3.65152	4.65436	4.68204	4.6254	4.48353	3.96074	4.64466	4.28213
ID652	4.50154	4.3662	4.70782	4.13782	4.39992	4.63994	4.56117	3.65168	4.71297	4.75964	4.66091	4.66783	4.35537	4.73749	4.30268
ID653	4.33881	4.24065	4.58366	4.2226	4.3979	4.62952	4.56982	3.48755	4.71794	4.7765	4.538	4.60534	4.12979	4.72279	4.25101
ID654	4.29454	4.21099	4.51341	3.88617	4.5168	4.48937	4.42988	3.58623	4.55271	4.57894	4.48001	4.52015	4.10548	4.66431	3.93114

## Sheet: TwinsUK_Skin
	MTND6	MTRNR2	MTATP6	MTND4L	MTND3	MTCYB	MTCO1	MTRNR1	MTND1	MTND4	MTND2	MTCO2	MTATP8	MTCO3	MTND5
ID1	4.26803	4.07074	4.29959	3.71172	4.26004	4.30341	4.36396	3.65391	4.34996	4.34227	4.27634	4.34466	3.99106	4.52394	3.87798
ID2	4.31927	4.15311	4.4116	4.0348	4.29182	4.47412	4.53111	3.60194	4.49643	4.57068	4.49028	4.45035	3.95177	4.6485	4.22163
ID3	4.14667	4.25085	4.29926	3.88764	4.19039	4.30123	4.47655	3.57792	4.36109	4.4112	4.21144	4.3466	3.87841	4.58546	3.96239
ID4	4.13158	4.10257	4.25178	3.64838	4.21094	4.32875	4.41925	3.47674	4.30714	4.40346	4.31745	4.37178	3.29804	4.51579	4.00489
ID5	4.34181	4.28668	4.51305	4.17973	4.4691	4.55487	4.65447	3.66106	4.56236	4.64284	4.49163	4.57005	4.06046	4.76132	4.31041
ID6	4.25501	4.18619	4.32113	3.93732	4.30595	4.39556	4.50709	3.5349	4.4184	4.45279	4.35529	4.41007	3.77339	4.61729	4.15433
ID7	4.12162	4.10928	4.31001	3.83548	4.11309	4.31672	4.45075	3.5984	4.43016	4.42128	4.35245	4.38644	3.85443	4.60593	3.96158
ID8	4.48564	4.28107	4.56229	4.23103	4.4177	4.63468	4.71556	3.66491	4.63602	4.70871	4.5619	4.59644	4.12096	4.7806	4.40051
ID9	4.13563	4.06681	4.26301	3.74702	4.08579	4.21649	4.33615	3.48441	4.2782	4.33037	4.2013	4.35186	3.81705	4.43368	3.85599
ID10	4.23685	4.11139	4.28568	3.70647	4.15176	4.37747	4.39621	3.54673	4.42646	4.40598	4.3704	4.41159	3.70017	4.55281	4.05009
ID11	4.32234	3.93822	4.36587	3.95908	4.27879	4.42145	4.43375	3.48223	4.46436	4.48676	4.4308	4.37332	3.87504	4.58161	4.17134
ID12	4.25785	4.17351	4.38018	3.96991	4.23884	4.4039	4.57156	3.65967	4.36538	4.46809	4.27904	4.47537	3.91037	4.62048	4.13956
ID13	4.44452	4.28189	4.51701	4.1753	4.35485	4.59556	4.69372	3.64302	4.54101	4.69301	4.47189	4.57708	4.04989	4.69906	4.37733
ID14	4.23216	4.13446	4.3486	3.82348	4.12944	4.38944	4.46234	3.55756	4.45826	4.43558	4.34313	4.33506	3.77582	4.52841	4.13007
ID15	4.29282	4.3462	4.45026	4.094	4.30697	4.48108	4.60673	3.69839	4.56449	4.565	4.42996	4.49125	4.00528	4.73334	4.20071
ID16	4.24056	4.14679	4.36668	3.95004	4.21471	4.40715	4.51712	3.54742	4.41615	4.50101	4.38362	4.41408	3.83017	4.57677	4.14583
ID17	4.1988	4.15811	4.36462	3.85036	4.21995	4.33645	4.45605	3.56958	4.38013	4.42726	4.21723	4.41367	3.92079	4.59576	3.94516
ID18	4.2839	4.07109	4.38312	3.81015	4.28975	4.3871	4.44816	3.5473	4.33958	4.45331	4.3113	4.44629	3.97948	4.53777	3.993
ID19	4.24384	4.18582	4.36163	3.99993	4.24788	4.30379	4.47411	3.67411	4.46892	4.44357	4.33855	4.38246	3.99261	4.56493	4.13825
ID20	4.30782	4.16608	4.41262	4.00652	4.29227	4.428	4.57688	3.5771	4.49567	4.49244	4.39902	4.45854	3.94391	4.69667	4.2016
ID21	4.38814	4.16381	4.42966	4.07062	4.25957	4.47138	4.61339	3.65377	4.39497	4.55951	4.35395	4.47004	4.03196	4.62632	4.28133
ID22	4.23276	4.16376	4.3386	3.89859	4.1563	4.38834	4.50384	3.62958	4.37978	4.4529	4.33177	4.36664	3.84372	4.58246	4.14189
ID23	4.33979	4.24744	4.48651	4.06503	4.3661	4.54205	4.57747	3.6878	4.58482	4.61307	4.47622	4.52796	3.98546	4.7379	4.21142
ID24	4.39964	4.2644	4.48822	4.05195	4.35397	4.44337	4.56879	3.65531	4.42689	4.5578	4.4136	4.4803	4.23078	4.63224	4.14272
ID25	4.31168	4.24159	4.43742	3.92489	4.30702	4.39337	4.48966	3.56589	4.38763	4.46936	4.3403	4.47679	4.1311	4.58989	4.01158
ID26	4.2205	4.18627	4.34916	3.8016	4.21951	4.29332	4.42819	3.46472	4.2979	4.38861	4.24094	4.4272	3.97669	4.57801	3.89391
ID27	4.19652	4.22951	4.32884	3.84783	4.27243	4.39216	4.53972	3.74223	4.34359	4.45046	4.33104	4.41089	3.66944	4.68141	4.10422
ID28	4.2899	4.04735	4.3797	3.90982	4.27064	4.4611	4.56578	3.55314	4.46063	4.53746	4.39613	4.48816	3.80518	4.67645	4.10826
ID29	4.23367	4.01958	4.35904	3.74179	4.18709	4.37346	4.41309	3.44164	4.39698	4.4412	4.3261	4.38702	3.84309	4.57369	3.98838
ID30	4.24332	4.12533	4.31736	3.53714	4.1954	4.24508	4.32195	3.77695	4.29251	4.32691	4.22725	4.37313	3.90554	4.47362	3.7535
ID31	4.31634	4.2116	4.45994	4.01686	4.21797	4.46282	4.61008	3.5254	4.52353	4.58628	4.41361	4.44361	4.05625	4.61843	4.24911
ID32	4.34931	4.34557	4.40876	3.96385	4.25412	4.43481	4.59521	3.6687	4.40686	4.50218	4.33396	4.45435	3.88805	4.62885	4.25622
ID33	4.36479	4.27541	4.48094	4.13187	4.3559	4.52199	4.60005	3.60711	4.49365	4.57867	4.46631	4.55513	4.05363	4.68276	4.29795
ID34	4.25176	4.02337	4.38873	3.9357	4.17693	4.38871	4.54775	3.50099	4.39262	4.44069	4.32366	4.41628	3.99556	4.62117	4.08369
ID35	4.30675	4.15112	4.44336	4.03543	4.2299	4.48753	4.52298	3.47666	4.50163	4.58593	4.43016	4.41393	4.00628	4.61119	4.22639
ID36	4.35952	4.09791	4.41859	4.01773	4.26499	4.45737	4.56825	3.44488	4.44762	4.54734	4.52811	4.44172	3.93568	4.58928	4.22426
ID37	4.2396	4.20704	4.36289	3.91823	4.16537	4.40205	4.568	3.60377	4.39731	4.506	4.30177	4.42863	3.7834	4.61059	4.10001
ID38	4.25743	4.14419	4.38022	3.70427	4.28768	4.32352	4.32946	3.70525	4.34173	4.39893	4.26771	4.46923	3.97062	4.57587	3.86092
ID39	4.21165	4.17419	4.34621	3.81061	4.27845	4.37628	4.43668	3.68963	4.32203	4.4315	4.30272	4.35158	3.76015	4.58818	4.04635
ID40	4.26057	4.16824	4.39603	3.71644	4.34343	4.41622	4.45986	3.69092	4.45578	4.46737	4.37855	4.51024	3.75643	4.69776	3.89728
ID41	4.295	4.09092	4.34528	3.92978	4.20135	4.40267	4.41115	3.48224	4.46808	4.47184	4.43476	4.36995	3.90636	4.6265	4.11862
ID42	4.30635	4.18626	4.46766	3.88924	4.17468	4.43925	4.51513	3.56746	4.53178	4.53427	4.4552	4.40577	3.77208	4.62132	4.2176
ID43	4.21292	4.01872	4.32913	3.80964	4.23391	4.37758	4.47071	3.53669	4.43423	4.45299	4.32328	4.41576	3.80051	4.62578	3.97469
ID44	4.31143	4.28587	4.41397	4.07128	4.42293	4.50688	4.6395	3.769	4.52038	4.56759	4.42018	4.54181	3.92624	4.8093	4.21905
ID45	4.23053	4.04052	4.30683	3.84346	4.21594	4.23154	4.3868	3.46205	4.38209	4.31636	4.25262	4.37446	4.07122	4.5421	3.93549
ID46	4.15609	4.0887	4.22953	3.79979	4.14259	4.32901	4.44882	3.51645	4.32377	4.39258	4.24686	4.319	3.62374	4.557	4.02856
ID47	4.11591	4.01003	4.26723	3.14217	4.14357	4.21401	4.24395	3.599	4.32941	4.27163	4.23227	4.40098	3.43559	4.58356	3.57627
ID48	4.29221	4.25352	4.38813	3.9354	4.27601	4.39878	4.57084	3.70235	4.44763	4.47864	4.35645	4.4417	3.89643	4.65711	4.07328
ID49	4.39578	4.21386	4.42453	3.74785	4.364	4.32848	4.51058	3.62672	4.4415	4.4566	4.31649	4.48079	4.1517	4.6395	3.89663
ID50	4.28849	4.17479	4.40814	3.99098	4.29759	4.38075	4.59852	3.80026	4.42569	4.46715	4.3846	4.54123	4.11994	4.68236	4.07805
ID51	4.14596	3.75841	4.22975	3.13716	4.14957	4.26483	4.14032	3.39498	4.31699	4.28975	4.31197	4.33798	3.43163	4.58021	3.61509
ID52	4.36168	4.16283	4.55585	4.11492	4.40077	4.57461	4.64463	3.65125	4.52306	4.65737	4.49045	4.57423	4.15137	4.7606	4.28791
ID53	4.38109	4.15219	4.46781	4.05858	4.3575	4.46156	4.57932	3.47823	4.49266	4.55943	4.36853	4.55776	3.9953	4.70648	4.23851
ID54	4.11119	4.11023	4.23694	3.64863	4.08247	4.31286	4.43992	3.58299	4.33584	4.3628	4.226	4.34448	3.60605	4.5757	3.849
ID55	4.23081	4.03695	4.34981	3.7105	4.15819	4.24253	4.3106	3.52031	4.30921	4.3738	4.22202	4.33625	4.0437	4.50183	3.83345
ID56	4.25164	3.92815	4.29442	3.77371	4.15388	4.38399	4.39747	3.41089	4.41587	4.43838	4.34108	4.35483	3.64901	4.5836	4.11174
ID57	4.12562	4.06608	4.27323	3.81272	4.0896	4.24157	4.35538	3.46987	4.32775	4.34061	4.19562	4.33289	3.90978	4.46371	3.88087
ID58	4.32035	4.11616	4.38995	3.93901	4.24251	4.41657	4.465	3.65587	4.44277	4.47591	4.42094	4.4578	3.88964	4.64296	4.19125
ID59	4.24144	4.1542	4.33013	3.91456	4.19747	4.39379	4.50398	3.58802	4.40402	4.47214	4.33654	4.42452	3.77687	4.60473	4.11209
ID60	4.20298	4.02902	4.22296	3.8437	4.27775	4.34867	4.48537	3.60332	4.5272	4.44681	4.35732	4.50778	3.75769	4.76293	4.01841
ID61	4.34105	4.09904	4.41608	4.04729	4.26167	4.50203	4.61445	3.5352	4.48063	4.56464	4.38729	4.53669	4.02868	4.70889	4.23535
ID62	4.29288	4.20649	4.35794	3.90723	4.28432	4.38242	4.49634	3.60927	4.4627	4.46364	4.38402	4.40412	3.81425	4.63843	4.13711
ID63	4.32872	4.16234	4.48846	4.01391	4.27735	4.44476	4.54416	3.629	4.38804	4.54847	4.29588	4.5234	4.03774	4.61378	4.10352
ID64	4.20794	4.17303	4.34651	3.88857	4.11374	4.34183	4.46849	3.44388	4.40845	4.4462	4.34718	4.39175	3.85437	4.58214	4.08467
ID65	4.18805	4.16342	4.35941	3.80089	4.18724	4.41236	4.50878	3.58037	4.4464	4.48949	4.40201	4.38619	3.88587	4.65874	4.09472
ID66	4.18792	4.15904	4.27184	3.52466	4.25943	4.33103	4.47519	3.73535	4.3899	4.40024	4.3454	4.4513	3.67072	4.60172	3.89452
ID67	4.24892	4.10226	4.40974	4.00349	4.25365	4.42653	4.48906	3.59731	4.41864	4.5222	4.38193	4.46023	3.95589	4.61048	4.12776
ID68	4.41005	4.29438	4.52768	4.18653	4.54158	4.56888	4.66402	3.79569	4.53694	4.61388	4.47772	4.59781	4.14321	4.79945	4.28024
ID69	4.29391	3.92614	4.34789	3.87844	4.24938	4.39077	4.41921	3.53042	4.35306	4.43703	4.32163	4.36922	3.91144	4.58926	4.09654
ID70	4.23857	4.03773	4.3266	3.92869	4.1669	4.38634	4.45798	3.36232	4.36495	4.46683	4.33209	4.34919	3.87022	4.53608	4.12016
ID71	4.38532	4.26838	4.50938	3.89393	4.37681	4.49974	4.63916	3.71748	4.56395	4.56461	4.4594	4.59024	4.07882	4.81094	4.15615
ID72	4.41632	4.22312	4.5737	4.15446	4.42492	4.55786	4.66712	3.67336	4.5714	4.70499	4.5235	4.58038	4.02903	4.7553	4.29836
ID73	4.35378	4.18307	4.43786	4.03441	4.34504	4.51097	4.62297	3.61409	4.48991	4.54136	4.41054	4.48838	3.9656	4.69889	4.2616
ID74	4.29623	4.05915	4.38613	3.87994	4.15377	4.29695	4.42985	3.43371	4.3892	4.44403	4.29947	4.39294	4.09982	4.53346	4.00413
ID75	4.11535	3.95402	4.23928	3.51463	4.17454	4.27299	4.41314	3.53974	4.36087	4.34755	4.29213	4.34763	3.49929	4.60769	3.79386
ID76	4.28133	4.24271	4.4111	3.76423	4.31353	4.34262	4.45084	3.54545	4.37797	4.45916	4.2856	4.50106	4.03663	4.62215	3.88207
ID77	4.12085	4.00287	4.23617	3.766	4.03104	4.26617	4.38515	3.44306	4.29869	4.37689	4.13121	4.33661	3.64903	4.48217	3.96569
ID78	4.19752	4.30772	4.38571	3.82563	4.23135	4.34398	4.57867	3.73629	4.41265	4.45912	4.28911	4.44265	3.8478	4.60054	3.97281
ID79	4.21829	4.09851	4.39263	3.95144	4.20694	4.39255	4.4863	3.49425	4.38411	4.51275	4.31355	4.40195	3.92104	4.54976	4.07966
ID80	4.12375	3.8068	4.24142	3.56693	4.14775	4.26196	4.33279	3.4211	4.30259	4.3499	4.22298	4.36228	3.58926	4.56355	3.79694
ID81	4.2182	4.08804	4.3218	3.82662	4.26149	4.31061	4.41519	3.45139	4.34919	4.37613	4.26104	4.39555	3.94985	4.51996	3.92051
ID82	4.34713	4.1334	4.43451	3.97023	4.29043	4.49826	4.58056	3.50246	4.52537	4.57082	4.44781	4.47899	3.87168	4.6295	4.19589
ID83	4.40531	4.42292	4.50451	4.08615	4.27916	4.49152	4.6985	3.57332	4.52462	4.62127	4.3567	4.49132	4.04139	4.72809	4.31993
ID84	4.20093	4.2283	4.35154	3.86028	4.19748	4.38557	4.52893	3.60642	4.48574	4.50589	4.35574	4.45333	3.77166	4.65438	4.00205
ID85	4.18164	4.0854	4.25224	3.67575	4.1563	4.19508	4.35091	3.51469	4.31575	4.31738	4.20282	4.34018	3.87705	4.49847	3.85966
ID86	4.24799	4.07679	4.35892	3.83744	4.15686	4.31235	4.34722	3.44457	4.3453	4.39522	4.2671	4.39947	3.95262	4.46067	3.96682
ID87	4.40609	4.14245	4.48246	4.06683	4.47286	4.54711	4.64003	3.62956	4.52062	4.58754	4.47524	4.56696	3.98603	4.72927	4.26499
ID88	4.3501	4.11351	4.47798	3.90572	4.31031	4.479	4.52795	3.6293	4.44067	4.53363	4.42609	4.50111	3.96644	4.70122	4.08802
ID89	4.44409	4.20688	4.53929	4.19505	4.4409	4.58746	4.64964	3.47156	4.5788	4.67802	4.49035	4.53098	4.07974	4.73304	4.31733
ID90	4.25001	4.17037	4.35566	3.72685	4.15771	4.29218	4.39549	3.63185	4.36695	4.39092	4.27284	4.41927	3.99443	4.56972	3.87137
ID91	4.22242	4.28829	4.33099	3.77794	4.27968	4.30228	4.40325	3.9415	4.37912	4.40588	4.26446	4.44077	3.92222	4.56844	3.89334
ID92	4.22385	4.22243	4.37137	3.91932	4.29861	4.4655	4.61527	3.57709	4.48345	4.59212	4.42397	4.46296	3.6462	4.66281	4.14697
ID93	4.35983	4.08206	4.43954	4.12053	4.3036	4.50279	4.53107	3.41322	4.48801	4.60791	4.38702	4.4293	3.99374	4.5527	4.2426
ID94	4.25107	4.02306	4.24499	3.77856	4.07733	4.2503	4.37405	3.50614	4.35774	4.35118	4.22347	4.32036	3.92505	4.48031	3.91695
ID95	4.24491	4.11483	4.33968	3.78893	4.22222	4.3544	4.4288	3.67544	4.30856	4.41654	4.32325	4.43126	3.82402	4.57339	3.98264
ID96	4.30662	4.16238	4.35595	3.73533	4.24683	4.38791	4.5476	3.56403	4.35772	4.52246	4.29008	4.42543	3.68745	4.59322	4.05197
ID97	4.17469	4.09691	4.27758	3.73451	4.17664	4.18324	4.3882	3.49302	4.31893	4.30774	4.1964	4.33298	3.90198	4.47296	3.82116
ID98	4.38575	4.239	4.52335	4.15355	4.33016	4.54151	4.64535	3.45185	4.55925	4.64123	4.39939	4.5238	4.11875	4.64644	4.28273
ID99	4.24839	3.96684	4.35627	3.91761	4.11294	4.30916	4.38372	3.37873	4.32272	4.44146	4.29686	4.32585	3.92038	4.53358	4.09785
ID100	4.33002	4.28362	4.45308	4.09848	4.24784	4.4908	4.59718	3.59243	4.43991	4.63943	4.36335	4.47378	3.95408	4.60726	4.23651
ID101	4.16514	4.0796	4.28633	3.58733	4.17816	4.24995	4.31594	3.65872	4.30558	4.32236	4.20298	4.38236	3.78492	4.54886	3.76166
ID102	4.30815	4.26866	4.45126	3.74615	4.31496	4.4326	4.50199	3.78283	4.46115	4.51343	4.35988	4.48823	3.81112	4.71056	3.98254
ID103	4.23515	4.09601	4.34804	3.98549	4.28946	4.38047	4.55435	3.55316	4.44451	4.44626	4.30065	4.42924	3.86924	4.68215	4.15618
ID104	4.13959	3.9436	4.20315	3.64148	4.15578	4.23596	4.47215	3.49389	4.2756	4.30885	4.2523	4.37295	3.60703	4.57642	3.84582
ID105	4.22316	4.08965	4.22947	3.83117	4.04964	4.32742	4.42769	3.51195	4.32041	4.4049	4.25082	4.26609	3.7033	4.36258	4.11181
ID106	4.10536	4.02122	4.2815	3.73167	4.1562	4.31602	4.45868	3.42772	4.38552	4.41088	4.24504	4.40158	3.60654	4.59945	3.89385
ID107	4.44454	4.30744	4.60353	4.29307	4.5043	4.62923	4.77264	3.67694	4.71714	4.72578	4.57944	4.66924	4.19795	4.78916	4.33598
ID108	4.32347	4.0758	4.51982	3.28022	4.28926	4.37581	4.2537	3.70568	4.36986	4.46254	4.32305	4.50497	3.61966	4.57545	3.6175
ID109	4.37064	4.15087	4.47829	4.04638	4.28036	4.53685	4.58713	3.60286	4.51928	4.59547	4.48482	4.50411	4.01143	4.68326	4.28432
ID110	4.26418	4.08249	4.36256	3.91285	4.12594	4.37944	4.46452	3.44394	4.43361	4.4276	4.35414	4.42587	3.84425	4.57707	4.11864
ID111	4.11769	4.01661	4.28303	3.74794	4.0475	4.28008	4.41358	3.51342	4.33539	4.39672	4.22992	4.30088	3.76471	4.55112	3.93162
ID112	4.27413	4.07389	4.31111	3.85009	4.16101	4.2681	4.4524	3.36995	4.31447	4.36513	4.30068	4.28748	4.01502	4.45841	4.00388
ID113	4.35061	4.17165	4.44205	4.08761	4.22096	4.46509	4.56841	3.48111	4.40855	4.58173	4.36024	4.49318	4.01932	4.64663	4.22639
ID114	4.30732	4.17117	4.46141	4.03257	4.26719	4.50003	4.59041	3.56035	4.5441	4.57908	4.42237	4.46772	3.94751	4.64106	4.21681
ID115	4.31806	4.0888	4.39672	3.9137	4.3469	4.4886	4.57934	3.61655	4.48699	4.55037	4.41548	4.51925	3.79207	4.72737	4.11756
ID116	4.30097	4.00532	4.42589	4.03615	4.32019	4.46573	4.47394	3.46223	4.43253	4.55138	4.41453	4.51617	3.97732	4.64393	4.16544
ID117	4.2846	4.14197	4.33487	3.70844	4.24165	4.28299	4.42342	3.56554	4.37545	4.36385	4.23054	4.49147	3.99858	4.55103	3.89289
ID118	4.25881	4.01883	4.29283	3.7949	4.12709	4.33088	4.2789	3.57172	4.3724	4.4188	4.28587	4.31486	3.67783	4.59261	4.15236
ID119	4.22534	4.23783	4.30354	3.89166	4.25362	4.26391	4.4918	3.68111	4.30912	4.43449	4.19619	4.44295	3.936	4.54489	3.96456
ID120	4.3665	4.14095	4.41106	3.98978	4.20846	4.42799	4.47626	3.53326	4.4696	4.51422	4.41621	4.35467	4.0274	4.55089	4.19298
ID121	4.35342	4.17229	4.40462	4.12332	4.25733	4.47367	4.55722	3.47673	4.49584	4.53394	4.38965	4.39388	4.04929	4.57187	4.26529
ID122	4.14511	4.14178	4.24782	3.72019	4.1309	4.31219	4.46369	3.6236	4.37835	4.37275	4.39914	4.28184	3.52182	4.5557	4.08505
ID123	4.15244	4.10941	4.33125	3.90808	4.03276	4.28058	4.44676	3.46287	4.27623	4.39517	4.17567	4.37011	4.00785	4.50891	3.9836
ID124	4.28427	4.06636	4.34551	3.88674	4.24857	4.3562	4.40903	3.55744	4.40711	4.41596	4.33228	4.35346	3.89559	4.57077	4.09423
ID125	4.2442	4.2734	4.49588	4.07794	4.22663	4.43871	4.56596	3.68711	4.49863	4.54956	4.42567	4.43177	4.0002	4.61032	4.17248
ID126	4.29054	4.28782	4.40631	3.99234	4.23821	4.35194	4.50572	3.75378	4.35771	4.49182	4.28556	4.44025	4.16637	4.58597	4.0461
ID127	4.23074	4.09742	4.31477	3.73191	4.20088	4.27037	4.3844	3.46569	4.35563	4.30914	4.23993	4.36147	3.96718	4.462	3.86339
ID128	4.13159	3.82089	4.01112	3.62948	4.0851	4.17305	4.28607	3.39773	4.32562	4.30402	4.20416	4.30317	3.48307	4.54596	3.84696
ID129	4.30546	4.0587	4.4259	3.99303	4.28564	4.4568	4.46265	3.40825	4.48576	4.53549	4.42416	4.44201	3.9742	4.6208	4.13865
ID130	4.34556	4.13053	4.38899	3.93009	4.22196	4.3805	4.50331	3.40056	4.43285	4.50918	4.32357	4.37681	3.913	4.56624	4.17061
ID131	4.38386	4.21996	4.54394	3.69928	4.37441	4.41168	4.4644	3.68473	4.40909	4.53182	4.34185	4.59302	4.05305	4.67957	3.88664
ID132	4.41355	4.25439	4.50479	4.10391	4.40532	4.55553	4.64846	3.65211	4.61485	4.64412	4.51404	4.53052	4.00113	4.73268	4.31667
ID133	4.31577	4.0339	4.31428	3.82996	4.32755	4.27697	4.40026	3.41329	4.27028	4.38745	4.21837	4.37882	3.9758	4.42101	3.93529
ID134	4.25226	4.004	4.36591	3.92845	4.16148	4.3839	4.46298	3.34482	4.4427	4.50194	4.32596	4.39408	3.92168	4.55403	4.07469
ID135	4.23847	4.17894	4.38988	3.91433	4.15234	4.32833	4.50007	3.69849	4.38643	4.43853	4.27375	4.45361	4.04047	4.59594	4.00764
ID136	4.22688	3.99871	4.3057	3.87157	4.2218	4.29965	4.3641	3.38297	4.31348	4.34191	4.27636	4.38525	4.09095	4.54155	3.96227
ID137	4.42072	4.2001	4.4856	3.98397	4.34973	4.58227	4.70213	3.62405	4.56291	4.64843	4.4593	4.56503	3.86318	4.72708	4.30437
ID138	4.21288	4.05612	4.3252	3.84698	4.15745	4.30646	4.37907	3.52265	4.2608	4.4031	4.20386	4.38608	3.91057	4.49006	3.94962
ID139	4.29725	4.29202	4.39231	3.97165	4.25962	4.39041	4.60211	3.59225	4.35228	4.4868	4.28829	4.4371	3.90749	4.62373	4.21572
ID140	4.24803	4.22168	4.41878	3.87795	4.21931	4.34114	4.50992	3.66715	4.41897	4.42428	4.22774	4.48396	4.02481	4.61812	3.98463
ID141	4.15161	4.08382	4.25156	3.7321	4.15181	4.3226	4.40397	3.57655	4.37406	4.37521	4.30854	4.39611	3.62121	4.55541	3.95911
ID142	4.17956	4.06	4.2742	3.73061	4.21464	4.31137	4.36742	3.54041	4.36687	4.3727	4.27792	4.38639	3.75326	4.53697	3.84126
ID143	4.2753	4.21904	4.39158	4.04191	4.22876	4.42734	4.55718	3.56161	4.50133	4.53841	4.34665	4.4354	3.93198	4.65493	4.21027
ID144	4.26984	4.13507	4.34695	3.97662	4.18362	4.37881	4.49698	3.39332	4.31295	4.47467	4.22968	4.35132	3.88424	4.57769	4.16877
ID145	4.25369	4.27058	4.3644	3.84148	4.3159	4.41771	4.49949	3.92739	4.37858	4.46444	4.32402	4.42422	3.78847	4.63949	4.04446
ID146	4.26998	4.20994	4.39624	3.76209	4.31939	4.40753	4.51137	3.65563	4.39107	4.46574	4.31619	4.46918	3.82932	4.65976	3.9961
ID147	4.24474	4.18196	4.32015	3.9241	4.19453	4.35576	4.52346	3.69397	4.41455	4.4275	4.26387	4.42309	3.86663	4.61464	4.13748
ID148	4.29719	4.26644	4.44217	4.07792	4.40007	4.45776	4.56286	3.67867	4.47746	4.52318	4.37955	4.45616	4.05227	4.69776	4.24874
ID149	4.31844	4.22044	4.42792	3.89303	4.38308	4.47852	4.54301	3.8486	4.54491	4.52514	4.45058	4.56381	3.87608	4.70559	4.0692
ID150	4.2542	4.09846	4.37855	3.88935	4.26098	4.35272	4.45033	3.54907	4.39844	4.45241	4.33935	4.41453	3.88495	4.63194	4.07389
ID151	4.1925	4.18491	4.30478	3.79684	4.24693	4.29329	4.50362	3.66174	4.37164	4.35923	4.22419	4.39518	3.97407	4.57539	3.97306
ID152	4.16019	4.04032	4.34816	3.82074	4.13507	4.35829	4.4762	3.44463	4.3382	4.4599	4.25178	4.43766	3.57453	4.59762	3.99452
ID153	4.05352	3.83985	4.25326	3.87112	4.27155	4.26883	4.25617	3.22377	4.37643	4.31142	4.17748	4.35067	3.83864	4.45151	3.93201
ID154	4.28749	4.06773	4.36985	3.92791	4.17033	4.36183	4.46618	3.45277	4.4271	4.49293	4.37435	4.45087	3.88352	4.5966	4.15066
ID155	4.35143	4.05643	4.40121	4.00655	4.28026	4.41908	4.51522	3.36664	4.48997	4.55709	4.39047	4.43432	3.88765	4.59269	4.20064
ID156	4.42065	4.33832	4.59477	4.13857	4.53446	4.59537	4.73785	3.65991	4.58537	4.6843	4.44353	4.61806	4.12843	4.83287	4.24908
ID157	4.01415	3.8966	4.21298	3.72416	4.15751	4.21339	4.31623	3.30304	4.34713	4.3272	4.17325	4.28068	3.72199	4.4843	3.88187
ID158	4.37149	4.29367	4.48096	3.99416	4.39478	4.40978	4.55649	3.6792	4.51324	4.54072	4.42377	4.5334	4.21782	4.69257	4.08033
ID159	4.48608	4.19654	4.58767	4.19164	4.44374	4.6454	4.71727	3.65145	4.66384	4.71039	4.59887	4.64431	4.07356	4.8088	4.42265
ID160	4.16186	3.99711	4.28238	3.73387	4.11993	4.21516	4.28523	3.43115	4.2357	4.307	4.16151	4.34432	3.83247	4.45809	3.83833
ID161	4.29548	4.28069	4.38381	3.93868	4.24095	4.38943	4.50908	3.82482	4.426	4.49568	4.33267	4.43347	3.87401	4.61337	4.13961
ID162	4.276	4.05341	4.36484	3.95233	4.18347	4.34742	4.47138	3.30593	4.37752	4.45254	4.26418	4.35948	4.07558	4.58158	4.13888
ID163	4.37541	4.29629	4.46615	4.04433	4.33352	4.48143	4.65442	3.56305	4.55342	4.6166	4.36658	4.47096	3.97979	4.70267	4.30385
ID164	4.30964	4.21983	4.4228	3.76725	4.31273	4.40019	4.52977	3.58365	4.47722	4.51938	4.29233	4.42508	3.83138	4.67628	3.97772
ID165	4.28782	4.06618	4.36113	3.84342	4.16019	4.37538	4.43525	3.55517	4.42326	4.4488	4.3479	4.40237	3.91029	4.62078	4.07553
ID166	4.22955	4.07498	4.30352	3.88127	4.05792	4.30331	4.4196	3.41245	4.35172	4.42992	4.25526	4.3259	3.84877	4.49813	4.09106
ID167	4.16027	4.03084	4.23172	3.61518	4.1416	4.26258	4.34443	3.49529	4.32778	4.34225	4.22531	4.32093	3.49625	4.56208	3.93011
ID168	4.28924	4.16852	4.42544	3.92333	4.33076	4.46211	4.50991	3.71774	4.49224	4.52103	4.42723	4.48169	3.87735	4.71426	3.99172
ID169	4.22588	4.14023	4.32662	3.71622	4.14147	4.21804	4.41021	3.49623	4.29625	4.34636	4.19471	4.48164	3.97108	4.45722	3.88781
ID170	4.23393	4.06733	4.29396	3.73329	4.18515	4.18544	4.40202	3.45302	4.35075	4.26208	4.19439	4.30949	4.06186	4.5249	3.87504
ID171	4.30751	3.96777	4.39942	4.05714	4.28468	4.46508	4.49631	3.44114	4.40427	4.5089	4.39478	4.38365	3.95598	4.58087	4.25142
ID172	4.26464	3.94751	4.28946	3.65592	4.17727	4.26687	4.33711	3.42365	4.33153	4.34754	4.26132	4.33237	3.93356	4.44923	3.82628
ID173	4.23695	4.15755	4.33438	3.96356	4.21001	4.35687	4.47703	3.538	4.33836	4.40387	4.22666	4.4096	4.17483	4.55532	4.05834
ID174	4.25337	4.24664	4.38345	4.07992	4.40352	4.41529	4.51555	3.64172	4.42677	4.52554	4.36781	4.47643	3.93722	4.66796	4.15184
ID175	4.30069	4.0762	4.36941	3.82379	4.35058	4.44805	4.50799	3.69512	4.45496	4.4694	4.41049	4.4758	3.81798	4.70403	4.04947
ID176	4.24626	4.10485	4.37262	3.75535	4.29842	4.42322	4.43545	3.65121	4.46424	4.47957	4.39183	4.45058	3.72303	4.66386	3.98247
ID177	4.24925	4.1575	4.2962	3.79914	4.11862	4.25875	4.4927	3.5702	4.34152	4.37986	4.25882	4.34406	3.85403	4.52051	3.9674
ID178	4.29617	4.19659	4.41155	3.87872	4.31297	4.40051	4.50288	3.59887	4.46905	4.51336	4.33522	4.52499	3.84821	4.6872	4.03162
ID179	4.05821	4.30447	4.18171	3.61922	3.97867	4.10814	4.21246	3.93344	4.23001	4.25377	4.0673	4.21232	3.74258	4.28353	3.75384
ID180	4.08379	3.93538	4.21612	3.76589	4.08997	4.25241	4.39809	3.4881	4.35498	4.36027	4.23459	4.31393	3.66077	4.54835	3.92033
ID181	4.30512	4.18581	4.36844	4.04152	4.2651	4.42458	4.5523	3.51167	4.48835	4.51225	4.40695	4.42866	4.00217	4.58532	4.16723
ID182	4.1173	3.96058	4.26523	3.71365	4.28302	4.30373	4.41768	3.52593	4.32331	4.38659	4.32012	4.41824	3.60679	4.61111	3.89617
ID183	4.26755	4.38583	4.4238	3.98961	4.25326	4.43974	4.58425	3.78031	4.48789	4.51352	4.36138	4.47776	3.97266	4.69512	4.15192
ID184	4.34945	4.09297	4.46915	3.97382	4.32909	4.43305	4.47462	3.59002	4.46347	4.51012	4.44417	4.44901	4.03154	4.6684	4.16553
ID185	4.43238	4.19039	4.48716	4.1069	4.35069	4.48362	4.55795	3.59288	4.54901	4.5649	4.48993	4.52733	4.09819	4.71257	4.25333
ID186	4.23885	4.17799	4.3038	3.84566	4.18547	4.36741	4.52348	3.59325	4.40647	4.44396	4.41859	4.33978	3.65679	4.58983	4.15234
ID187	4.20852	4.02573	4.33363	3.89234	4.22089	4.32653	4.40688	3.45171	4.29404	4.39756	4.21707	4.38926	4.0016	4.5445	3.99264
ID188	4.18669	4.16976	4.34556	3.75414	4.21242	4.32173	4.40706	3.76744	4.34272	4.38229	4.19485	4.39556	3.8599	4.65712	3.84849
ID189	4.32392	4.07508	4.42614	3.64684	4.21703	4.3094	4.38702	3.51468	4.31536	4.41522	4.28052	4.46917	3.84978	4.58059	3.8692
ID190	4.2374	4.14898	4.36626	3.95161	4.12714	4.43045	4.55267	3.46696	4.42896	4.54165	4.34012	4.3921	3.80462	4.57581	4.16077
ID191	4.23499	3.99415	4.46147	4.00215	4.37199	4.46586	4.48816	3.40174	4.53416	4.4947	4.41555	4.44289	3.95075	4.59521	4.10157
ID192	4.46142	4.26777	4.5372	4.19505	4.49205	4.61569	4.70036	3.72113	4.63525	4.66153	4.54539	4.59725	4.12654	4.8051	4.34965
ID193	4.23566	4.13425	4.33116	3.82017	4.28929	4.38346	4.46276	3.56173	4.38304	4.44575	4.34786	4.42555	3.78046	4.61915	4.01185
ID194	4.30406	4.06625	4.37103	3.79614	4.34554	4.33035	4.4541	3.5315	4.33143	4.46707	4.28509	4.37648	3.88755	4.57317	3.89561
ID195	4.23682	4.01746	4.44662	4.01666	4.39687	4.54509	4.59174	3.53747	4.60383	4.4733	4.46444	4.52701	4.02865	4.73398	4.12877
ID196	4.22706	4.19845	4.32667	3.914	4.05753	4.28449	4.50649	3.55737	4.30716	4.41626	4.18638	4.34443	4.0885	4.4714	4.04849
ID197	4.17583	4.14114	4.34092	3.50204	4.33499	4.30273	4.3512	3.60953	4.35063	4.3596	4.24806	4.43416	3.58603	4.64858	3.73074
ID198	4.18185	4.11293	4.38629	3.87931	4.34709	4.39133	4.52058	3.61447	4.45234	4.46611	4.33523	4.48984	3.85201	4.69655	3.99463
ID199	4.26067	4.00833	4.34363	3.96636	4.29894	4.43696	4.47264	3.50434	4.44662	4.49405	4.34675	4.40294	3.85439	4.62403	4.1438
ID200	4.28262	4.21085	4.39996	4.046	4.33202	4.39563	4.48589	3.62858	4.48908	4.49011	4.42954	4.43249	4.01324	4.63505	4.14441
ID201	4.10434	4.03345	4.20378	3.76403	4.02987	4.23106	4.37401	3.46693	4.21823	4.30581	4.10361	4.36025	3.69052	4.54948	3.96975
ID202	4.34532	4.09994	4.45034	4.03209	4.26654	4.49984	4.56812	3.49179	4.4649	4.55123	4.40282	4.4404	3.97964	4.64294	4.23964
ID203	4.24844	4.03853	4.43339	4.05124	4.22684	4.4314	4.52968	3.41336	4.43945	4.55769	4.36934	4.43296	4.12327	4.63417	4.20685
ID204	4.17357	4.17336	4.3072	3.9156	4.12263	4.28402	4.42963	3.46707	4.37755	4.40122	4.21944	4.35473	3.98265	4.5326	3.99507
ID205	4.38825	3.99005	4.4844	4.11779	4.27751	4.54233	4.55544	3.26022	4.48778	4.64176	4.46429	4.49542	4.04681	4.58022	4.27882
ID206	4.32261	4.21875	4.43911	4.08346	4.37202	4.46578	4.59759	3.57323	4.4305	4.55706	4.31973	4.47421	4.034	4.68853	4.21125
ID207	4.20578	4.01346	4.21173	3.60114	4.17459	4.23664	4.36333	3.30562	4.2251	4.37732	4.13685	4.26121	3.59648	4.37543	3.81315
ID208	4.4348	4.13742	4.49996	4.13194	4.38311	4.50692	4.64195	3.49422	4.57598	4.61804	4.41252	4.56972	4.07787	4.76069	4.29815
ID209	4.29031	4.08278	4.38994	3.92016	4.32111	4.4124	4.46727	3.56294	4.4046	4.47365	4.36411	4.43919	3.83446	4.59529	4.12528
ID210	4.16514	4.29732	4.29324	3.38813	4.21437	4.24846	4.23944	4.13636	4.30511	4.34304	4.22818	4.42721	3.49202	4.54188	3.65907
ID211	4.24626	4.01781	4.24158	3.80193	4.21742	4.30732	4.32697	3.27842	4.28687	4.45475	4.23446	4.30528	3.70427	4.4524	3.99242
ID212	4.27617	4.11781	4.35281	3.89979	4.25149	4.31205	4.44462	3.42233	4.36154	4.4121	4.29388	4.42619	4.02121	4.60086	4.05078
ID213	4.23662	3.86236	4.27965	3.85943	3.80721	4.30799	4.42953	3.19156	4.26142	4.42729	4.28648	4.15583	3.77997	4.4051	4.01881
ID214	4.34792	4.06766	4.41074	3.92243	4.28752	4.41247	4.51562	3.50288	4.45316	4.49603	4.38462	4.38075	3.88646	4.63615	4.19407
ID215	4.3667	4.02564	4.39398	3.94145	4.19687	4.42123	4.44221	3.47874	4.38171	4.50055	4.38027	4.44765	3.98473	4.55965	4.17142
ID216	4.36151	4.21138	4.43376	4.05329	4.29338	4.48016	4.60403	3.58702	4.5494	4.54636	4.4036	4.46153	3.97577	4.68412	4.27663
ID217	4.39088	4.17533	4.46453	4.02596	4.29679	4.41778	4.53833	3.66213	4.46491	4.5273	4.29851	4.48686	4.03019	4.64401	4.20389
ID218	4.15348	4.66939	4.28619	3.46661	4.20252	4.27704	4.3596	NA	4.36723	4.36654	4.25979	4.37344	3.60457	4.56461	3.79142
ID219	4.18607	4.15105	4.24303	3.73486	4.16173	4.23738	4.39576	3.52826	4.187	4.32162	4.1386	4.35139	3.79416	4.41533	3.86916
ID220	4.1701	4.13129	4.30474	3.47902	4.157	4.29471	4.40034	3.60574	4.35967	4.3973	4.2819	4.48092	3.50067	4.62231	3.70626
ID221	4.27236	4.14999	4.36759	3.78379	4.17439	4.26313	4.44408	3.57914	4.37482	4.35394	4.27287	4.4229	4.04533	4.54074	3.89978
ID222	4.21203	4.12421	4.37432	3.83575	4.21093	4.3636	4.41563	3.59265	4.44368	4.44798	4.24782	4.38692	3.82691	4.68969	4.03956
ID223	4.27383	4.20817	4.40273	3.98596	4.16834	4.3956	4.55262	3.58576	4.48513	4.50175	4.31158	4.46914	3.97828	4.62418	4.14796
ID224	4.20405	4.13958	4.2929	3.91608	4.13596	4.27252	4.46776	3.45006	4.32593	4.40885	4.17392	4.32687	3.94387	4.55749	3.98877
ID225	4.11406	4.21875	4.23769	3.76201	4.05036	4.24948	4.37203	4.03029	4.33737	4.31636	4.18266	4.25282	3.79085	4.43038	3.91543
ID226	4.30634	4.20432	4.36011	3.90435	4.28817	4.35334	4.55576	3.66495	4.40797	4.4704	4.37189	4.39229	3.85513	4.59953	4.16785
ID227	4.22867	4.35829	4.38546	3.93054	4.31238	4.38424	4.55468	3.86609	4.39335	4.48899	4.34851	4.46705	3.87153	4.66109	4.06792
ID228	4.14678	4.06728	4.28847	3.55579	4.24723	4.30421	4.36907	3.58658	4.35557	4.36686	4.27301	4.44371	3.61981	4.6178	3.73641
ID229	4.26204	4.24987	4.40721	4.04468	4.24652	4.45605	4.55827	3.60719	4.51477	4.56869	4.40897	4.47729	3.93091	4.6781	4.19674
ID230	4.21904	4.15311	4.38509	3.67476	4.25241	4.41558	4.4643	3.52405	4.41487	4.43907	4.34098	4.43743	3.8351	4.6211	3.92882
ID231	4.30082	4.15019	4.35207	3.94868	4.16978	4.37391	4.51379	3.59443	4.40884	4.46731	4.32387	4.42005	3.8906	4.58902	4.18187
ID232	4.20812	4.01068	4.38684	3.48749	4.16961	4.30892	4.2749	3.46827	4.38259	4.39288	4.27619	4.47659	3.66499	4.60225	3.68523
ID233	4.22837	4.15569	4.33474	3.79321	4.09934	4.20867	4.41993	3.48977	4.32382	4.36136	4.17313	4.39798	4.05305	4.54982	3.92577
ID234	4.23597	4.0978	4.37178	3.93929	4.097	4.37199	4.45158	3.43596	4.32597	4.44738	4.25151	4.38986	3.92418	4.47908	4.1396
ID235	4.3124	4.37951	4.42997	4.03902	4.30575	4.4313	4.62427	3.74025	4.51529	4.58377	4.38439	4.51067	3.93836	4.68759	4.24146
ID236	4.30204	4.18428	4.37438	3.95839	4.21687	4.41163	4.53095	3.59416	4.43017	4.48661	4.30431	4.43789	3.91191	4.66144	4.17307
ID237	4.22787	4.19245	4.34983	3.78385	4.12306	4.28078	4.44344	3.66294	4.29822	4.38411	4.20888	4.37235	4.01725	4.47701	3.92844
ID238	4.23999	3.98724	4.36096	3.35574	4.27477	4.2475	4.26258	3.54942	4.3382	4.29647	4.29046	4.42362	3.77815	4.54128	3.60118
ID239	4.28645	4.18735	4.38733	4.07616	4.26514	4.3825	4.4942	3.55497	4.38738	4.50561	4.32297	4.35306	4.00171	4.50106	4.19637
ID240	4.26786	4.11102	4.37864	3.45102	4.28696	4.35885	4.42278	3.61906	4.42207	4.35813	4.32184	4.51385	3.62313	4.71191	3.78098
ID241	4.16611	3.96476	4.20914	3.80258	4.03281	4.25089	4.32496	3.32244	4.34028	4.39352	4.28825	4.24938	3.80059	4.44234	3.99768
ID242	4.23556	4.16732	4.31633	3.83007	4.08589	4.20403	4.43844	3.52929	4.38492	4.34755	4.19457	4.36647	4.06575	4.56659	3.96936
ID243	4.23663	4.10323	4.34191	3.89592	4.14946	4.3611	4.49993	3.48091	4.42088	4.44154	4.29227	4.3918	3.85265	4.60173	4.11659
ID244	4.26181	4.29055	4.35325	3.82783	4.26541	4.33671	4.45084	3.65034	4.35655	4.3896	4.33131	4.46868	3.83871	4.60414	3.97851
ID245	4.28122	4.36626	4.41002	3.97267	4.31401	4.44373	4.63065	3.63675	4.44769	4.50199	4.36139	4.40347	3.80919	4.69714	4.22287
ID246	4.2839	4.11602	4.43987	3.76096	4.28583	4.43437	4.46601	3.57335	4.4223	4.50296	4.38348	4.50836	3.88291	4.66271	4.00198
ID247	4.25845	4.1373	4.31219	3.72518	4.08028	4.34027	4.48667	3.55347	4.32964	4.40247	4.20276	4.3742	3.85118	4.51188	3.94256
ID248	4.1928	4.40071	4.34731	3.99577	4.24476	4.39224	4.59672	3.65822	4.41867	4.54292	4.28981	4.39794	3.81573	4.55726	4.15771
ID249	4.26324	4.14405	4.39204	4.02711	4.18765	4.38024	4.59243	3.47099	4.43833	4.54071	4.33742	4.50408	3.95874	4.6824	4.14705
ID250	4.27353	4.40467	4.44702	4.04545	4.34925	4.45382	4.577	3.8187	4.40646	4.55467	4.34912	4.52173	3.99681	4.73057	4.16075
ID251	4.35788	4.33776	4.40555	4.0224	4.2612	4.43108	4.52609	3.56675	4.4086	4.52487	4.39191	4.39963	3.97688	4.56566	4.25007
ID252	4.07349	3.97933	4.20189	3.61473	3.96017	4.16164	4.28601	3.38586	4.21389	4.19581	4.09481	4.28929	3.79609	4.46677	3.78338
ID253	4.34058	4.2256	4.5056	4.0457	4.3029	4.50866	4.57327	3.62598	4.52333	4.55461	4.4744	4.57111	4.04258	4.72656	4.2249
ID254	4.16517	4.20161	4.29905	3.06351	4.38195	4.21063	4.20935	3.75133	4.2682	4.26822	4.15862	4.44732	3.29071	4.57844	3.43766
ID255	4.17949	4.25226	4.31741	3.75328	4.09415	4.29062	4.42999	3.81804	4.36215	4.41496	4.19409	4.35387	3.86363	4.57702	3.99914
ID256	4.17992	3.88709	4.32988	3.43966	4.21351	4.28757	4.37232	3.52149	4.37935	4.42788	4.27499	4.42505	3.59617	4.62548	3.77526
ID257	4.35353	4.22289	4.50082	4.18627	4.33333	4.54149	4.66494	3.64092	4.53035	4.64108	4.41468	4.52774	4.06443	4.70665	4.30227
ID258	4.18744	3.98417	4.34272	3.6589	4.19801	4.33987	4.43796	3.47763	4.45605	4.45714	4.32081	4.37562	3.82861	4.60048	3.90313
ID259	4.38435	4.3293	4.49063	4.10689	4.39962	4.52657	4.63409	3.72655	4.61707	4.62698	4.50143	4.57263	3.95148	4.75526	4.28461
ID260	4.17982	4.2048	4.43831	4.01075	4.21689	4.39322	4.53881	3.53774	4.48727	4.49696	4.34193	4.48608	4.03655	4.62597	4.04491
ID261	4.23943	4.1242	4.34386	3.89676	4.20803	4.35204	4.47163	3.51745	4.4398	4.44915	4.33419	4.37451	3.82349	4.628	4.10766
ID262	4.12258	3.90206	4.21321	3.73663	4.03866	4.15625	4.29735	3.38327	4.31476	4.27594	4.12334	4.26225	3.81789	4.35138	3.91118
ID263	4.23539	4.23733	4.36551	3.79313	4.2893	4.35068	4.47617	3.729	4.39125	4.47163	4.3234	4.4255	3.68298	4.59057	3.98234
ID264	4.24343	4.14081	4.29826	3.89163	4.15643	4.27169	4.45345	3.49022	4.34554	4.38289	4.19622	4.35201	4.07877	4.5434	3.97457
ID265	4.07727	3.91928	4.17789	3.75379	4.05863	4.24252	4.40212	3.50089	4.30228	4.33168	4.19333	4.24631	3.63776	4.49048	3.94718
ID266	4.38255	4.16392	4.44613	4.0879	4.24753	4.5026	4.60502	3.54142	4.51996	4.5913	4.42099	4.47142	3.95043	4.69512	4.30817
ID267	4.27706	4.08485	4.46731	3.985	4.31928	4.52479	4.75415	3.5834	4.56774	4.66	4.46055	4.48807	3.83981	4.73813	4.20764
ID268	4.25014	4.30996	4.38582	3.76526	4.33914	4.4166	4.59482	3.65895	4.39511	4.52713	4.307	4.46374	3.59114	4.63502	4.02279
ID269	4.18669	4.29362	4.34364	3.83501	4.17727	4.27503	4.50822	3.61929	4.38258	4.39801	4.20282	4.4153	3.93114	4.64055	3.95668
ID270	4.1101	4.27347	4.28252	3.81041	4.11365	4.25132	4.43228	4.03375	4.32083	4.35319	4.17064	4.34248	3.84337	4.45776	3.90026
ID271	4.18521	3.99051	4.31328	3.88234	4.11621	4.33544	4.39517	3.46224	4.30768	4.42242	4.25193	4.33956	3.83777	4.5157	4.07883
ID272	4.18855	4.09282	4.24435	3.7667	4.13697	4.31508	4.42835	3.62753	4.34869	4.37569	4.24612	4.34474	3.74892	4.49981	3.99434
ID273	4.34763	4.23436	4.47587	4.10431	4.33354	4.49245	4.63692	3.64419	4.44236	4.57805	4.44787	4.53181	4.03687	4.69638	4.26558
ID274	4.34152	3.95327	4.38304	4.02354	4.08013	4.39707	4.42149	3.33917	4.41481	4.50433	4.38406	4.32211	4.04419	4.49426	4.22243
ID275	4.2466	4.26701	4.30274	3.88056	4.16672	4.31539	4.44514	3.52819	4.42002	4.42255	4.2451	4.30546	3.85405	4.46969	4.12219
ID276	4.28712	4.37033	4.45837	4.01043	4.41404	4.41912	4.63078	3.75612	4.44273	4.52517	4.34391	4.57641	3.94297	4.76251	4.15307
ID277	4.29024	4.3261	4.38712	3.97935	4.2024	4.38618	4.5899	3.63592	4.37283	4.51132	4.3001	4.41974	3.88421	4.53252	4.19848
ID278	4.20454	4.0143	4.34391	3.8732	4.10653	4.28402	4.41401	3.41474	4.38776	4.43399	4.32985	4.34198	3.93005	4.56133	4.06407
ID279	4.15969	3.95901	4.32214	3.67497	4.12636	4.21095	4.33905	3.45068	4.28799	4.28569	4.21252	4.34978	4.05837	4.50488	3.8363
ID280	4.25962	4.28116	4.29014	3.78566	4.22636	4.24233	4.4962	3.74774	4.34842	4.38612	4.24566	4.37537	3.89806	4.54438	3.94506
ID281	4.41551	4.14871	4.50563	4.15682	4.47065	4.54853	4.59258	3.51342	4.48595	4.63212	4.49603	4.58885	4.08756	4.73785	4.27255
ID282	4.09785	4.09767	4.15058	3.69673	4.09299	4.08842	4.21065	3.45513	4.27251	4.22374	4.11952	4.22758	3.82114	4.37057	3.80718
ID283	4.17911	3.97775	4.27087	3.85196	4.11443	4.34625	4.46311	3.35593	4.32754	4.42975	4.29088	4.27903	3.70625	4.4472	4.1044
ID284	4.30419	4.18029	4.38128	3.8871	4.33733	4.44926	4.49127	3.52949	4.46099	4.50833	4.39073	4.40789	3.7785	4.6178	4.10839
ID285	4.4318	4.18154	4.47052	4.04684	4.27244	4.48403	4.61108	3.43148	4.50017	4.6037	4.35758	4.4869	4.00416	4.69788	4.2923
ID286	4.3728	4.39332	4.44668	3.95663	4.42837	4.47793	4.61314	3.81564	4.47007	4.54451	4.45025	4.52083	3.94318	4.77653	4.16581
ID287	4.24785	4.21938	4.45793	3.82699	4.21685	4.35511	4.47076	3.80067	4.32946	4.44781	4.19784	4.53	3.97298	4.57224	3.90973
ID288	4.26393	4.25306	4.36828	3.95298	4.23584	4.34435	4.50657	3.54889	4.42783	4.48569	4.25435	4.43182	3.99659	4.60558	4.04581
ID289	4.15321	3.97065	4.24364	3.82671	4.12483	4.3144	4.38703	3.43773	4.30507	4.4052	4.19925	4.29579	3.72417	4.5019	3.97711
ID290	4.24953	4.21993	4.4221	3.9601	4.24654	4.42165	4.51112	3.70569	4.46835	4.47692	4.29222	4.45583	3.93187	4.66232	4.13574
ID291	4.15021	4.47042	4.26408	3.68816	4.08313	4.17549	4.4239	NA	4.32984	4.2382	4.17825	4.39429	3.81036	4.53258	3.8074
ID292	4.20298	4.35362	4.29767	3.70251	4.19947	4.27379	4.41799	NA	4.34201	4.36455	4.2597	4.38362	3.8698	4.53934	3.83034
ID293	4.21993	3.90032	4.42545	3.28911	4.41251	4.32098	4.2038	3.49744	4.29393	4.45001	4.3338	4.45507	3.53401	4.51427	3.57609
ID294	4.27433	3.94121	4.36194	3.87243	4.07739	4.37384	4.43089	3.4547	4.37559	4.45556	4.34119	4.35544	3.88582	4.48547	4.14004
ID295	4.26631	4.11233	4.38454	3.94485	4.29247	4.4276	4.46686	3.5887	4.4874	4.46292	4.39547	4.45	3.89862	4.64261	4.14589
ID296	4.38645	4.11679	4.48346	4.13372	4.43313	4.50123	4.60231	3.44771	4.51247	4.62518	4.43037	4.53866	4.06785	4.68401	4.26579
ID297	4.16877	4.02786	4.23804	3.86435	4.07531	4.30368	4.35331	3.43075	4.34	4.39032	4.23325	4.26304	3.78658	4.46065	4.04902
ID298	4.30795	4.16404	4.38752	3.84628	4.29363	4.35077	4.44089	3.55171	4.35869	4.44156	4.31307	4.44492	4.08723	4.5535	3.9897
ID299	4.18286	4.10694	4.31835	3.52025	4.27057	4.27626	4.42326	3.59454	4.28783	4.37988	4.25905	4.46187	3.58567	4.65398	3.77494
ID300	4.37919	4.20103	4.53614	4.06278	4.46389	4.56641	4.60933	3.53252	4.59684	4.65649	4.49367	4.5497	4.08291	4.76764	4.22777
ID301	4.24479	4.15219	4.38465	4.0136	4.2452	4.44432	4.5443	3.56118	4.46271	4.51478	4.40492	4.47437	3.90364	4.68492	4.17824
ID302	4.31824	4.10757	4.36868	3.88674	4.29458	4.39639	4.53218	3.53878	4.46988	4.48765	4.35032	4.471	3.81806	4.64917	4.06162
ID303	4.19132	4.0062	4.36199	3.97341	4.15674	4.40192	4.45033	3.50434	4.43043	4.46848	4.31919	4.35374	4.07375	4.54732	4.15824
ID304	4.14702	4.02956	4.32723	3.69975	4.23606	4.23491	4.3308	3.4259	4.27591	4.32208	4.19403	4.37832	3.85634	4.45121	3.7805
ID305	4.28504	4.1621	4.35394	3.89365	4.18106	4.37686	4.48821	3.57009	4.40334	4.44848	4.23468	4.46269	3.94078	4.55958	4.02508
ID306	4.21913	4.11927	4.29231	3.82948	4.15229	4.18791	4.3667	3.39186	4.29373	4.33452	4.19776	4.38901	4.03747	4.53172	3.96283
ID307	4.33948	4.09218	4.37956	3.98405	4.20056	4.4289	4.52328	3.50658	4.51613	4.4704	4.38122	4.44556	3.93019	4.62751	4.18083
ID308	4.23144	4.30039	4.41264	3.9113	4.19318	4.36146	4.47906	3.63957	4.40647	4.44975	4.34934	4.4421	4.13906	4.5786	3.98731
ID309	4.37752	4.20427	4.44391	4.00728	4.44757	4.45029	4.56406	3.82201	4.49932	4.48531	4.43074	4.48317	4.00448	4.67421	4.22061
ID310	4.30075	4.1902	4.4487	3.95653	4.27862	4.49347	4.56539	3.58569	4.53475	4.56585	4.44914	4.4388	4.04361	4.65284	4.21674
ID311	4.2266	4.10197	4.32784	3.84782	4.16764	4.29109	4.49252	3.54926	4.32897	4.35659	4.22756	4.35372	3.94617	4.59177	3.99275
ID312	4.13469	3.97617	4.19262	3.86065	4.0364	4.27133	4.32487	3.53674	4.31171	4.34138	4.21058	4.22751	3.77023	4.43913	4.04294
ID313	4.3768	3.94467	4.42261	3.8434	4.31074	4.44299	4.43793	3.4559	4.38549	4.48341	4.39197	4.46193	3.88716	4.65728	4.14121
ID314	4.12445	3.93575	4.19494	3.66456	4.04269	4.15227	4.2241	3.39059	4.22562	4.23824	4.06601	4.23869	3.8707	4.37288	3.81913
ID315	4.07492	4.00679	4.22786	3.86114	3.97173	4.2021	4.34578	3.58917	4.23789	4.35186	4.10139	4.33208	3.76744	4.38869	3.97574
ID316	4.36174	4.16561	4.46257	4.07466	4.23843	4.48138	4.55769	3.53786	4.5102	4.57183	4.39419	4.48411	4.02908	4.69105	4.25087
ID317	4.21934	4.06826	4.26858	3.79617	4.16853	4.33134	4.4203	3.44362	4.31589	4.41896	4.27504	4.33807	3.64037	4.49191	4.02988
ID318	4.27127	4.04907	4.35307	3.77013	4.11807	4.27641	4.37999	3.47235	4.30017	4.3209	4.22332	4.39072	4.04718	4.51313	3.93536
ID319	4.14862	4.28447	4.29371	3.8392	4.13482	4.34039	4.51642	3.80833	4.38043	4.39236	4.36617	4.36709	3.70494	4.52038	4.03624
ID320	4.20592	4.19778	4.34397	3.65928	4.18742	4.28651	4.40801	3.62009	4.35715	4.35535	4.25447	4.42471	3.82334	4.59285	3.8503
ID321	4.06551	4.12326	4.36443	3.7936	4.28591	4.29175	4.38918	3.53564	4.36825	4.41373	4.31249	4.46706	3.93566	4.55861	3.77841
ID322	4.2155	4.16832	4.33476	3.81129	4.22342	4.35929	4.43054	3.68912	4.40648	4.4288	4.34483	4.38535	3.7859	4.60522	4.05486
ID323	4.34851	3.9601	4.36689	3.94494	4.23112	4.42069	4.35829	3.28874	4.39577	4.58074	4.40631	4.33075	3.79108	4.46691	4.20383
ID324	4.28302	4.07232	4.30224	3.83336	3.92655	4.34655	4.47546	3.41433	4.41876	4.43577	4.29845	4.32822	3.88894	4.52407	4.03798
ID325	4.25499	4.25787	4.43404	3.93759	4.1129	4.33518	4.51346	3.59822	4.29971	4.45851	4.21583	4.50564	4.10127	4.46039	4.03098
ID326	4.38489	4.17492	4.39671	3.97615	4.20674	4.3662	4.47613	3.58132	4.45135	4.48105	4.27414	4.44274	3.9145	4.57908	4.25356
ID327	4.22062	4.11054	4.29699	3.89847	4.15815	4.36112	4.42085	3.37514	4.43294	4.48258	4.30918	4.36879	3.80568	4.49325	4.09414
ID328	4.34288	4.28038	4.48968	4.07148	4.3771	4.53383	4.64216	3.76697	4.53639	4.57422	4.50412	4.52958	3.99005	4.80399	4.22794
ID329	4.14209	3.90111	4.25631	3.7375	4.11792	4.25208	4.33095	3.29612	4.29139	4.32479	4.19455	4.25245	3.87135	4.49172	3.88149
ID330	4.22308	3.87687	4.34341	3.93939	4.1249	4.36812	4.39803	3.39523	4.46035	4.4782	4.37901	4.35389	3.89054	4.54128	4.09627
ID331	4.33475	4.09323	4.40907	3.98569	4.18954	4.47624	4.54507	3.61034	4.51331	4.52806	4.43686	4.49243	3.90032	4.68719	4.23215
ID332	4.32475	4.19766	4.40135	3.85647	4.35963	4.30698	4.46411	3.53348	4.3838	4.42213	4.28597	4.4163	4.13403	4.54495	3.94429
ID333	4.28144	4.22865	4.48159	3.96088	4.27355	4.48702	4.59831	3.78269	4.41302	4.59524	4.39934	4.47609	3.97414	4.62626	4.20526
ID334	4.19023	3.68595	4.34869	3.15219	4.13874	4.27311	4.07961	3.33815	4.23263	4.37493	4.2191	4.43116	3.39739	4.5825	3.63161
ID335	4.20226	3.9814	4.24264	3.79301	4.16057	4.26336	4.36542	3.53061	4.31441	4.338	4.2679	4.31779	3.69542	4.50953	4.02771
ID336	4.31026	4.18396	4.38352	3.94457	4.31526	4.40384	4.5785	3.61167	4.31981	4.50569	4.30207	4.43925	3.89954	4.49922	4.18068
ID337	4.23156	4.17886	4.3441	3.75679	4.15035	4.25211	4.43405	3.60654	4.38924	4.37745	4.22306	4.40743	4.03118	4.61393	3.89311
ID338	4.18036	4.09561	4.26662	3.77638	4.1179	4.28781	4.37417	3.51531	4.39192	4.35742	4.2785	4.32285	3.77395	4.52039	3.92565
ID339	4.32851	4.17445	4.41033	3.98153	4.30922	4.41656	4.51399	3.56884	4.47442	4.49995	4.40001	4.45083	3.9087	4.7042	4.19396
ID340	4.16678	4.11146	4.30424	3.79188	4.17557	4.32234	4.48852	3.64447	4.38185	4.40288	4.32567	4.43293	3.75149	4.64913	3.94416
ID341	4.15886	4.16075	4.31067	3.61845	4.22197	4.26965	4.36193	3.79684	4.31685	4.36773	4.21859	4.36722	3.78826	4.47962	3.74337
ID342	4.27001	4.31498	4.39849	3.96931	4.2659	4.39799	4.52948	3.66472	4.43884	4.48541	4.36374	4.51661	4.03429	4.61581	4.05297
ID343	4.10993	3.97057	4.18951	3.53556	4.01758	4.27709	4.31852	3.46579	4.27979	4.35381	4.30105	4.2499	3.31609	4.48341	3.98607
ID344	4.35619	4.0576	4.47356	3.9379	4.38901	4.4204	4.60677	3.57621	4.51538	4.51791	4.38484	4.5962	4.08671	4.73108	4.04796
ID345	3.89917	4.3145	4.03811	3.43942	3.86403	4.0055	4.23176	NA	4.07702	4.12028	3.90987	4.20949	3.48114	4.3043	3.61398
ID346	4.1055	3.90201	4.20723	3.65985	4.0851	4.25788	4.31255	3.37703	4.30212	4.32698	4.23309	4.29216	3.55357	4.49404	3.90082
ID347	4.13229	4.02116	4.25885	3.66462	4.22907	4.30087	4.4773	3.53729	4.37482	4.38019	4.28753	4.37668	3.66081	4.54926	3.82339
ID348	4.32626	4.07657	4.3391	3.83675	4.25365	4.30167	4.48447	3.48636	4.38732	4.37755	4.27336	4.36149	3.99383	4.54181	3.93238
ID349	4.3684	4.23598	4.48382	4.01987	4.33469	4.47606	4.63471	3.58199	4.49942	4.58948	4.35538	4.5274	3.93451	4.7041	4.25135
ID350	4.22749	4.00628	4.27608	3.82581	4.14504	4.25272	4.38964	3.41299	4.31461	4.35326	4.1852	4.35988	3.93878	4.49464	3.98688
ID351	4.17731	3.8915	4.24648	3.68289	4.10644	4.27384	4.34373	3.35905	4.28378	4.34892	4.23195	4.25724	3.73972	4.47256	3.94297
ID352	4.35866	4.36392	4.47961	4.14782	4.30853	4.50662	4.67766	3.67132	4.54591	4.62197	4.43239	4.5355	4.08047	4.72386	4.30275
ID353	4.22752	4.15047	4.34435	3.92717	4.28688	4.46131	4.40724	3.47191	4.49983	4.58054	4.49957	4.40046	3.76248	4.56816	4.02219
ID354	4.31893	4.21329	4.3962	3.99701	4.17655	4.43436	4.48617	3.50192	4.40497	4.54617	4.34329	4.41557	3.92343	4.55879	4.23666
ID355	4.39527	4.16648	4.44077	4.01877	4.3258	4.38846	4.56152	3.57702	4.47275	4.51381	4.38976	4.51707	4.21802	4.64421	4.12043
ID356	4.18146	4.0859	4.34355	4.03071	4.16449	4.40871	4.49676	3.50922	4.42635	4.49937	4.37219	4.40667	3.76918	4.63841	4.11732
ID357	4.283	4.08768	4.41902	3.96731	4.13225	4.44671	4.47094	3.48852	4.45772	4.5324	4.35733	4.37457	3.96401	4.55576	4.16433
ID358	4.21964	4.16333	4.36521	3.84511	4.31122	4.30095	4.46427	3.61365	4.39614	4.39134	4.29723	4.47919	4.03811	4.63449	3.90824
ID359	4.26773	3.97835	4.36134	3.89707	4.09199	4.38159	4.42864	3.32322	4.37074	4.45775	4.31815	4.30891	3.88416	4.49955	4.13608
ID360	4.11694	4.08023	4.30322	3.7627	4.08304	4.25424	4.26383	3.83807	4.20675	4.30727	4.15815	4.35882	3.87247	4.3818	3.86389
ID361	4.25888	3.96119	4.25688	3.90279	4.1395	4.32789	4.45687	3.36267	4.37201	4.36044	4.29292	4.40715	4.00386	4.54807	4.06736
ID362	4.2433	4.09479	4.35101	3.95322	4.22452	4.31839	4.45364	3.44669	4.37015	4.424	4.2269	4.38113	3.96514	4.55832	4.09265
ID363	4.28332	4.08135	4.32109	3.64323	4.30032	4.22304	4.37644	3.56726	4.28704	4.34404	4.16018	4.41487	3.85282	4.50166	3.79175
ID364	4.35911	4.35329	4.48742	3.78228	4.26545	4.42375	4.4279	4.06014	4.4381	4.50632	4.37682	4.51883	4.02373	4.56783	3.93617
ID365	4.24325	4.0755	4.29344	3.90726	4.20648	4.39022	4.58937	3.51568	4.45477	4.4583	4.35158	4.36172	3.7803	4.60602	4.19225
ID366	4.37248	4.29786	4.36444	3.92594	4.31577	4.42877	4.62792	3.73302	4.5093	4.47577	4.39542	4.45994	3.8923	4.62973	4.19971
ID367	4.02068	4.21025	4.31001	3.63042	4.25098	4.25266	4.42142	3.52482	4.29722	4.35741	4.18287	4.45361	3.81426	4.56339	3.69985
ID368	4.21834	4.15486	4.36813	3.86532	4.16046	4.30844	4.49674	3.58538	4.36817	4.41618	4.36113	4.37422	3.96881	4.54498	3.98001
ID369	4.36899	4.22497	4.41637	3.94375	4.20993	4.42618	4.55864	3.51409	4.42775	4.53695	4.39613	4.42818	3.93378	4.6454	4.20368
ID370	4.11567	4.09353	4.20356	3.68016	4.08024	4.26816	4.37559	3.56955	4.30785	4.30786	4.20466	4.29924	3.62016	4.45823	3.92764
ID371	4.29911	4.16913	4.38951	3.54589	4.18822	4.30004	4.34705	3.65921	4.35441	4.33324	4.24638	4.45945	3.93025	4.55822	3.79246
ID372	4.18789	3.99182	4.28104	3.65474	4.07574	4.25124	4.31084	3.36624	4.26785	4.32371	4.17811	4.34428	3.81335	4.47254	3.80992
ID373	4.26745	4.3674	4.44826	3.78199	4.32316	4.40571	4.54827	3.67681	4.36246	4.45744	4.34239	4.52447	4.03266	4.66326	3.89012
ID374	4.26495	4.08862	4.29063	3.88504	4.236	4.22945	4.40399	3.43494	4.28264	4.3559	4.18833	4.43109	4.14829	4.52895	3.95982
ID375	4.41205	4.11598	4.45369	4.04841	4.32439	4.50017	4.69176	3.61943	4.56063	4.5507	4.43599	4.54057	4.11585	4.67869	4.23367
ID376	4.05755	3.91535	4.1809	3.56638	4.04564	4.20587	4.3529	3.48583	4.27889	4.30683	4.19181	4.25403	3.576	4.45962	3.83674
ID377	4.16832	4.08886	4.31126	3.85958	4.13498	4.27888	4.3972	3.4561	4.32498	4.36165	4.19823	4.36645	3.94144	4.49233	3.94341
ID378	4.17456	4.01618	4.27395	3.73675	4.06735	4.22487	4.36164	3.41132	4.3338	4.32589	4.19784	4.31969	3.92003	4.45048	3.87377
ID379	4.22149	4.05111	4.28242	3.88987	4.19454	4.32609	4.39352	3.40516	4.37076	4.45002	4.30353	4.28131	3.72753	4.49995	4.09943
ID380	4.14472	4.06523	4.29739	3.35277	4.21445	4.2445	4.24822	3.816	4.33344	4.2959	4.27651	4.36389	3.50713	4.65367	3.68666
ID381	4.2132	4.05802	4.36134	3.65182	4.34672	4.36353	4.39692	3.58774	4.46986	4.41483	4.39249	4.4215	3.78456	4.62057	3.80045
ID382	4.26324	4.06289	4.31265	3.75859	4.20335	4.37326	4.40086	3.52859	4.44032	4.41856	4.35167	4.42008	3.74526	4.60987	3.96672
ID383	4.18848	4.02385	4.23375	3.70607	4.07209	4.20519	4.37745	3.47931	4.22292	4.2698	4.16704	4.30252	3.89819	4.43568	3.895
ID384	4.29774	4.08551	4.38057	3.94242	4.19112	4.40866	4.47475	3.58711	4.45489	4.49979	4.37672	4.38271	3.92013	4.47396	4.16802
ID385	4.20897	4.11531	4.28621	3.7062	4.1534	4.21089	4.40397	3.51126	4.21054	4.315	4.12999	4.36067	3.83984	4.48831	3.85014
ID386	4.28968	4.07209	4.41155	4.00435	4.30565	4.4701	4.49704	3.50979	4.45501	4.51461	4.4213	4.45032	3.91921	4.68818	4.20078
ID387	4.4521	4.26468	4.58001	4.19696	4.56333	4.60467	4.68288	3.62344	4.66734	4.66761	4.65562	4.63716	4.20821	4.82894	4.26689
ID388	4.26563	4.17581	4.39337	4.03677	4.27014	4.44521	4.57887	3.6701	4.38607	4.49192	4.32282	4.46768	3.9725	4.67584	4.19471
ID389	4.39184	4.18829	4.46296	4.09442	4.3049	4.49436	4.59628	3.59947	4.49606	4.604	4.41437	4.54996	3.97994	4.70119	4.26189
ID390	4.3929	4.14731	4.52333	4.05889	4.42637	4.49949	4.58953	3.55214	4.4857	4.59993	4.42968	4.564	4.03212	4.69618	4.25365
ID391	4.26419	4.19816	4.42386	4.0638	4.22185	4.44116	4.5356	3.56415	4.52097	4.54524	4.40281	4.42596	4.02031	4.66051	4.16936
ID392	4.18267	3.97067	4.20412	3.79757	4.06241	4.2674	4.3758	3.34892	4.36996	4.40462	4.29265	4.29341	3.81222	4.48379	4.03289
ID393	4.23806	4.19093	4.46255	4.02662	4.39628	4.46361	4.50042	3.50464	4.48357	4.54211	4.43121	4.46976	3.99479	4.67525	4.0914
ID394	4.18344	4.24844	4.24491	3.7313	4.08854	4.22067	4.34873	3.88828	4.32274	4.31827	4.19459	4.33716	3.80023	4.46205	3.89633
ID395	4.32017	4.04065	4.38683	3.80512	4.36102	4.35769	4.42508	3.48408	4.38218	4.44273	4.31875	4.44723	4.07385	4.57011	3.92018
ID396	4.09791	4.05479	4.41949	3.91231	4.24689	4.40182	4.50385	3.42247	4.53579	4.47131	4.39557	4.42288	4.097	4.63228	4.05442
ID397	4.17584	4.02118	4.27425	3.84906	4.14214	4.36094	4.43497	3.48724	4.35387	4.41697	4.26454	4.3558	3.73946	4.57934	4.04198
ID398	4.19473	4.16759	4.31392	3.75734	4.17946	4.32878	4.45332	3.62395	4.41877	4.41771	4.27664	4.42707	3.72275	4.63262	3.94405
ID399	4.157	4.16357	4.30571	3.63848	4.18116	4.31166	4.42355	3.71184	4.40372	4.43075	4.2694	4.39965	3.66058	4.59555	3.83322
ID400	4.20052	4.03994	4.27819	3.84969	4.16815	4.33363	4.43423	3.50027	4.37794	4.41759	4.29899	4.35399	3.78985	4.5839	4.03352
ID401	4.18418	4.04892	4.32891	3.75277	4.19459	4.26555	4.36097	3.46315	4.29058	4.33881	4.24241	4.3772	3.91551	4.54091	3.89121
ID402	4.2207	4.15859	4.3561	3.40641	4.26017	4.30106	4.40258	3.71579	4.38639	4.39386	4.23635	4.47213	3.60773	4.59323	3.68048
ID403	4.24484	4.14603	4.37989	3.87469	4.16988	4.38665	4.49675	3.5317	4.38006	4.50054	4.2929	4.39818	3.86563	4.47224	4.10617
ID404	4.33564	4.37688	4.46638	4.04315	4.31643	4.46139	4.64969	3.7587	4.47501	4.56622	4.40003	4.50986	3.9333	4.73003	4.21269
ID405	4.13604	3.94112	4.20275	3.47424	4.13138	4.24306	4.35379	3.60064	4.24168	4.30668	4.20333	4.3208	3.49585	4.52414	3.75158
ID406	4.32913	4.14763	4.43325	3.99518	4.2992	4.4718	4.50877	3.64145	4.51349	4.5187	4.47593	4.48828	3.93009	4.70384	4.17334
ID407	4.36132	4.08175	4.38937	3.95457	4.16821	4.36894	4.54816	3.50721	4.42058	4.43305	4.31648	4.38098	4.17876	4.56482	4.11625
ID408	4.21225	4.1034	4.3527	3.94016	4.20816	4.43132	4.58048	3.56856	4.42495	4.52904	4.40153	4.41828	3.7083	4.64895	4.18413
ID409	4.28031	4.27203	4.3806	3.84005	4.33598	4.44462	4.5931	3.66607	4.45697	4.52163	4.36855	4.48834	3.60024	4.67253	4.0816
ID410	4.22264	4.02123	4.31906	3.88958	4.13083	4.3411	4.3984	3.49199	4.36807	4.43371	4.29365	4.30075	3.86642	4.49362	4.10269
ID411	4.32657	4.22662	4.47973	3.99406	4.29677	4.46125	4.60805	3.71163	4.52768	4.5442	4.42532	4.51278	3.95617	4.72139	4.18808
ID412	4.248	4.3144	4.41871	3.79407	4.31458	4.36606	4.60826	NA	4.48929	4.47601	4.30855	4.53544	3.93094	4.66526	4.03308
ID413	4.16897	4.02643	4.31116	3.70439	4.1462	4.35918	4.52493	3.5387	4.42836	4.46114	4.2943	4.35622	3.63927	4.6441	3.95602
ID414	4.07863	3.94539	4.26011	3.51432	4.15742	4.25797	4.42592	3.53531	4.25924	4.33537	4.19511	4.39975	3.57712	4.61576	3.72765
ID415	4.33099	4.16527	4.43532	3.75411	4.36297	4.4283	4.51864	3.68094	4.41671	4.53257	4.42339	4.55581	3.77012	4.70879	3.98251
ID416	4.10534	4.1915	4.28747	3.75272	4.04488	4.20327	4.35777	3.63495	4.26624	4.29823	4.11545	4.3647	3.97703	4.47659	3.83983
ID417	4.23555	3.975	4.45265	3.86581	4.2119	4.40422	4.43303	3.42064	4.29644	4.47858	4.2523	4.41059	3.84981	4.46883	4.03401
ID418	4.28741	4.14924	4.37526	3.94436	4.262	4.45328	4.54347	3.5107	4.46377	4.52109	4.36321	4.40448	3.81274	4.57301	4.20398
ID419	4.4214	4.09668	4.57215	4.04841	4.35229	4.5756	4.61126	3.56208	4.5771	4.68511	4.58515	4.53794	4.14857	4.69125	4.27315
ID420	4.26323	4.11964	4.38805	3.89194	4.23967	4.37524	4.47414	3.54768	4.43292	4.45506	4.33643	4.40627	3.91052	4.6233	4.10526
ID421	4.19663	4.21601	4.38763	3.85059	4.16718	4.30741	4.48228	3.57569	4.32583	4.40234	4.24485	4.41063	4.00688	4.50756	3.92992
ID422	4.29456	4.11918	4.51205	3.7165	4.36267	4.52838	4.52802	3.59537	4.44235	4.58615	4.41395	4.57525	3.81493	4.69875	3.95976
ID423	4.15445	4.18558	4.32248	3.88858	4.13775	4.2823	4.47101	3.50168	4.27246	4.41509	4.18069	4.36785	3.94794	4.42392	3.98744
ID424	4.12265	3.87809	4.24381	3.46826	4.16105	4.22273	4.33676	3.46317	4.32119	4.31397	4.23415	4.4347	3.54308	4.64858	3.75553
ID425	4.39694	4.29461	4.46272	4.11442	4.35034	4.516	4.6423	3.51951	4.56375	4.56901	4.38785	4.48617	4.07037	4.73263	4.31199
ID426	4.31534	4.08825	4.41605	3.96923	4.30919	4.4988	4.52503	3.40241	4.50421	4.58004	4.43032	4.45158	3.84567	4.65213	4.17663
ID427	4.20547	4.05029	4.30135	3.64549	4.19984	4.25865	4.30435	3.47525	4.37245	4.33396	4.23327	4.42401	3.8585	4.49738	3.78347
ID428	4.39386	3.94518	4.35147	3.82857	4.19701	4.36476	4.54188	3.46453	4.38584	4.39928	4.32016	4.46497	4.08799	4.5092	4.08952
ID429	4.3045	4.31646	4.42235	3.97432	4.23737	4.46199	4.5986	3.65595	4.52753	4.56529	4.37923	4.44652	3.90098	4.67161	4.16375
ID430	4.24597	4.04876	4.35612	3.70677	4.23254	4.34981	4.36888	3.5008	4.37592	4.40548	4.26941	4.39468	3.95972	4.51024	3.87759
ID431	4.16355	4.08917	4.22826	3.47505	4.17959	4.17397	4.21948	3.70231	4.23274	4.27581	4.13943	4.35286	3.68171	4.4263	3.6984
ID432	4.25639	4.1816	4.38973	3.9637	4.29887	4.41631	4.52419	3.63436	4.44856	4.48495	4.3765	4.45727	3.91183	4.70827	4.12867
ID433	4.28485	4.18386	4.36171	3.67555	4.21906	4.29311	4.39134	3.74875	4.336	4.39769	4.25724	4.38267	3.97606	4.53465	3.88006
ID434	4.29937	4.06571	4.37779	3.78114	4.21745	4.35984	4.40293	3.56368	4.35416	4.42934	4.28885	4.41021	3.91924	4.5646	3.95135
ID435	4.30997	4.25435	4.44868	3.85734	4.36174	4.34512	4.48303	3.48498	4.43754	4.49974	4.29736	4.44981	4.10364	4.64727	3.93254
ID436	4.29942	4.01612	4.41471	3.98049	4.26288	4.46182	4.49233	3.42529	4.46389	4.5048	4.37358	4.42297	3.96229	4.5425	4.1388
ID437	4.26596	4.0241	4.3298	3.78197	4.23221	4.21086	4.40477	3.28408	4.24922	4.34711	4.10373	4.33436	4.0699	4.49176	3.87401
ID438	4.23266	4.06599	4.32017	3.43101	4.15085	4.22885	4.29816	3.56511	4.24083	4.33571	4.17687	4.35923	3.78947	4.46825	3.68105
ID439	4.46085	4.2148	4.57438	4.23294	4.45845	4.63995	4.68138	3.62647	4.67721	4.65559	4.61708	4.5815	4.06424	4.81697	4.40803
ID440	4.2814	4.352	4.39315	3.90288	4.3295	4.43031	4.54142	3.7179	4.48063	4.52805	4.37953	4.42147	3.82861	4.66043	4.09653
ID441	4.30681	4.3402	4.38557	3.71767	4.31389	4.30901	4.45741	3.90462	4.31521	4.414	4.17008	4.42831	3.98358	4.57723	3.87747
ID442	4.19314	4.17576	4.32904	3.81502	4.34156	4.33392	4.47201	3.67989	4.33629	4.44806	4.34133	4.41575	3.84024	4.58885	3.93756
ID443	4.22725	4.21414	4.38003	3.86005	4.18789	4.31027	4.47511	3.56733	4.33411	4.42114	4.24828	4.45693	3.97295	4.57055	3.94686
ID444	4.19365	4.18682	4.31567	3.88458	4.19133	4.38613	4.49887	3.51624	4.39405	4.45833	4.29325	4.35864	3.76232	4.57338	4.08233
ID445	4.15875	3.95701	4.25793	3.65595	4.10618	4.29915	4.29243	3.43343	4.30827	4.3306	4.24605	4.32428	3.675	4.48994	3.9154
ID446	4.18189	4.35964	4.35511	3.89469	4.05004	4.23672	4.64162	3.86598	4.50995	4.39978	4.27444	4.46338	3.94257	4.53632	4.09602
ID447	4.22918	4.13149	4.31502	3.85943	4.09717	4.31255	4.50829	3.45964	4.27807	4.40361	4.1806	4.36941	3.90287	4.52839	3.98834
ID448	4.22919	4.17788	4.37747	3.80005	4.31016	4.29648	4.44748	3.54596	4.39652	4.42002	4.29884	4.40476	3.9515	4.60449	3.8883
ID449	4.29632	4.32515	4.42365	4.03703	4.25841	4.39312	4.53426	3.69485	4.44776	4.52159	4.32863	4.44205	4.09323	4.60243	4.15719
ID450	4.4039	4.12524	4.48227	4.09107	4.44745	4.59455	4.62705	3.60747	4.5712	4.64815	4.5177	4.53062	3.8973	4.79659	4.28788
ID451	4.41229	4.02119	4.45715	3.92632	4.30302	4.50085	4.47967	3.4697	4.48081	4.51843	4.44348	4.44286	3.93103	4.65267	4.24
ID452	4.25111	4.26145	4.38676	4.01515	4.21213	4.43298	4.60284	3.64122	4.40408	4.54389	4.32319	4.41155	3.94179	4.64175	4.17965
ID453	4.28613	4.24432	4.33934	3.78044	4.29798	4.31187	4.52692	3.61897	4.38436	4.36464	4.28275	4.44126	3.96296	4.58232	3.95079
ID454	4.32722	3.98033	4.36616	3.89024	4.15578	4.39541	4.40781	3.40272	4.29527	4.47524	4.29764	4.36042	3.90739	4.5221	4.05073
ID455	4.266	4.36598	4.36582	3.86127	4.19114	4.29624	4.52041	4.0206	4.36083	4.38119	4.12565	4.46593	3.99234	4.55941	4.01313
ID456	4.26323	4.09327	4.33202	3.80199	4.13986	4.31146	4.40748	3.46755	4.37075	4.38414	4.2791	4.42452	3.97155	4.52559	3.94448
ID457	4.38739	4.39469	4.51624	4.10031	4.2929	4.49423	4.63997	3.73175	4.52843	4.60279	4.42442	4.51785	4.06864	4.73259	4.27476
ID458	4.32507	4.22831	4.42371	3.83273	4.25892	4.37775	4.52401	3.7902	4.36672	4.48236	4.30141	4.49844	4.00539	4.60246	3.98327
ID459	4.29818	4.30699	4.31307	3.87238	4.29267	4.42298	4.52648	3.64523	4.41443	4.46218	4.38641	4.34932	3.66332	4.5679	4.20383
ID460	4.23106	4.07063	4.36283	3.73569	4.2168	4.2763	4.30163	3.54954	4.33251	4.36472	4.25655	4.38105	4.00151	4.49612	3.83949
ID461	4.38795	4.29691	4.51141	4.10909	4.32012	4.5205	4.62346	3.54918	4.45537	4.64679	4.39185	4.59315	4.02726	4.76569	4.26883
ID462	4.12027	4.0819	4.22468	3.61474	4.10993	4.20241	4.39586	3.53676	4.27588	4.30058	4.18139	4.33284	3.61972	4.50309	3.89177
ID463	3.99197	4.08678	4.16362	3.58417	4.0215	4.08344	4.26257	3.51131	4.21712	4.1732	4.061	4.31313	3.66307	4.47122	3.69967
ID464	4.22927	4.1321	4.35988	3.92899	4.23816	4.37411	4.46086	3.62952	4.35951	4.45785	4.33692	4.44154	3.87901	4.57835	4.10329
ID465	4.14022	3.86855	4.18808	3.68757	4.08779	4.1587	4.32528	3.32148	4.28649	4.27768	4.18378	4.25881	3.78115	4.39402	3.83947
ID466	4.19669	3.97262	4.33127	3.65045	4.2486	4.32924	4.40639	3.55075	4.34448	4.37313	4.31674	4.44412	3.75906	4.56879	3.9277
ID467	4.27336	4.17369	4.39865	3.88223	4.26473	4.36088	4.42804	3.60514	4.41776	4.45285	4.37518	4.4034	3.74684	4.60141	4.07996
ID468	4.3525	4.26159	4.46345	4.09283	4.37587	4.50202	4.67241	3.72304	4.47343	4.62357	4.43809	4.54207	3.9664	4.69019	4.27299
ID469	4.11695	4.07281	4.23616	3.70672	4.01442	4.2614	4.45267	3.42746	4.26823	4.32918	4.19062	4.27164	3.67706	4.50451	3.98893
ID470	4.25277	3.99285	4.33571	3.89463	4.13389	4.39584	4.47183	3.43197	4.4257	4.46724	4.32255	4.36079	3.82046	4.56472	4.13207
ID471	4.13222	4.24447	4.43378	3.99133	4.34028	4.39161	4.5464	3.53916	4.45298	4.55526	4.33938	4.4631	3.98168	4.68121	3.94965
ID472	4.24453	3.94973	4.34897	3.83717	4.33449	4.36868	4.48967	3.65772	4.51803	4.43658	4.40004	4.49593	3.73066	4.73581	4.03835
ID473	4.31473	4.18862	4.41153	3.99902	4.37998	4.42369	4.49436	3.55207	4.42666	4.54404	4.4074	4.45491	3.91275	4.59881	4.17767
ID474	4.29603	4.2962	4.3653	4.01123	4.34299	4.38216	4.5322	3.66884	4.4546	4.45095	4.32478	4.38002	4.00104	4.67116	4.17214
ID475	4.2318	4.43278	4.29047	3.6219	4.26461	4.27343	4.48191	NA	4.45118	4.39962	4.36044	4.48763	3.64717	4.65107	3.83078
ID476	4.38775	4.27614	4.41763	3.99181	4.25316	4.40996	4.54815	3.59454	4.45893	4.53274	4.37572	4.4478	3.97369	4.60223	4.19395
ID477	4.32075	4.07828	4.38777	4.06536	4.24409	4.42213	4.54919	3.4667	4.47824	4.54564	4.40292	4.44607	3.87252	4.64659	4.197
ID478	4.21359	4.18535	4.2757	3.85949	4.18101	4.31421	4.43286	3.4927	4.40543	4.41996	4.28096	4.32911	3.76044	4.50992	4.0638
ID479	4.22657	4.10807	4.29364	3.65899	4.15502	4.26157	4.36635	3.4607	4.37734	4.3164	4.23096	4.34034	3.93681	4.49355	3.79908
ID480	4.29024	4.2245	4.3946	4.02826	4.21136	4.38001	4.56493	3.49148	4.48012	4.59611	4.36296	4.40013	3.88584	4.60541	4.18716
ID481	4.06897	4.03125	4.25269	3.6923	4.07727	4.25846	4.35982	3.5009	4.28628	4.3239	4.24829	4.36403	3.66501	4.58807	3.90583
ID482	4.46483	4.12042	4.54239	4.19113	4.43886	4.5803	4.59952	3.51505	4.50406	4.67992	4.49008	4.517	4.1222	4.6608	4.31722
ID483	4.17862	4.109	4.2914	3.87064	4.15856	4.27462	4.476	3.58208	4.32215	4.38695	4.25527	4.37117	3.92217	4.55772	3.93315
ID484	4.3871	4.36576	4.51761	4.04905	4.44714	4.507	4.6188	3.82102	4.51808	4.57992	4.49287	4.53264	4.10344	4.74941	4.27993
ID485	4.24685	3.95494	4.28264	3.68602	4.22258	4.34489	4.41663	3.43724	4.35701	4.42656	4.33398	4.41507	3.64596	4.59026	3.97623
ID486	4.26477	4.00893	4.39131	3.91546	4.22288	4.33448	4.42807	3.36486	4.31934	4.44534	4.24762	4.35172	4.13286	4.48237	4.01433
ID487	4.41655	4.23243	4.47608	4.1642	4.29242	4.48595	4.60447	3.64336	4.47907	4.60919	4.43958	4.49092	4.0393	4.67237	4.35763
ID488	4.27188	4.06869	4.34007	3.75723	4.21091	4.2996	4.39047	3.46755	4.33752	4.40916	4.28448	4.37964	4.02978	4.46838	3.94932
ID489	4.24712	4.10749	4.32574	3.8484	4.1398	4.29841	4.47093	3.55628	4.34506	4.34617	4.23645	4.35671	4.11995	4.5383	4.01491
ID490	4.38576	4.32264	4.51423	4.09106	4.34423	4.51984	4.61982	3.65679	4.40966	4.6311	4.41262	4.50425	4.05615	4.67481	4.25542
ID491	4.2765	4.13055	4.37381	3.91065	4.21837	4.4216	4.47791	3.48597	4.47659	4.48429	4.3652	4.39205	3.84326	4.56513	4.11844
ID492	4.3917	4.07182	4.37005	3.76568	4.11159	4.38785	4.55138	3.38553	4.35944	4.51228	4.32836	4.35403	3.85924	4.56154	4.06099
ID493	4.42971	4.48882	4.55903	4.21442	4.39388	4.59357	4.67664	3.82516	4.6468	4.68036	4.55604	4.63218	4.17306	4.8099	4.35006
ID494	4.20235	3.97789	4.26794	3.77561	4.1534	4.23994	4.4294	3.23635	4.30645	4.35737	4.10399	4.3063	3.89393	4.43358	3.87154
ID495	4.26098	4.01382	4.29132	3.87699	4.08133	4.30917	4.43451	3.2724	4.29899	4.45139	4.13436	4.27469	3.79519	4.38029	4.13239
ID496	4.1915	4.09828	4.24382	3.75377	4.11805	4.25359	4.36165	3.48367	4.26544	4.32631	4.07988	4.26179	3.96062	4.42614	3.86682
ID497	4.24985	4.18325	4.36887	3.47422	4.2787	4.30454	4.35791	3.7772	4.38122	4.39349	4.30682	4.48578	3.75983	4.53093	3.72852
ID498	4.22675	4.18385	4.20898	3.97525	4.1853	4.35008	4.45773	3.65247	4.3721	4.45324	4.30515	4.38545	3.78489	4.64144	4.11984
ID499	4.33071	4.29237	4.4213	4.01623	4.16505	4.44526	4.60338	3.61828	4.50435	4.57314	4.38909	4.46883	3.88884	4.66033	4.25315
ID500	4.27735	4.11509	4.38347	3.97905	4.2766	4.4294	4.53968	3.58306	4.42939	4.52025	4.34497	4.41455	3.83286	4.59345	4.18045
ID501	4.35121	4.23992	4.4552	4.03182	4.50398	4.52282	4.61007	3.69122	4.61057	4.56299	4.49074	4.52702	3.97662	4.77654	4.21031
ID502	4.26541	4.11953	4.34488	3.89065	4.14703	4.39103	4.46801	3.55145	4.37679	4.44311	4.32895	4.35778	3.85376	4.55264	4.14487
ID503	4.31343	4.15525	4.47125	3.61728	4.23663	4.37105	4.36685	3.80214	4.37313	4.44405	4.29615	4.50656	3.93674	4.6318	3.81578
ID504	4.3364	4.20396	4.51271	4.08916	4.35818	4.54936	4.63276	3.60294	4.5953	4.65064	4.48535	4.51043	4.11995	4.74878	4.28609
ID505	4.35057	4.25021	4.53321	4.26459	4.42439	4.56717	4.62613	3.59573	4.60408	4.63032	4.49878	4.5718	4.21719	4.74432	4.31288
ID506	4.39846	4.21015	4.50729	4.09789	4.38563	4.56191	4.60115	3.68375	4.58891	4.64457	4.52592	4.5218	4.00162	4.75678	4.28819
ID507	4.21519	4.1742	4.38097	3.94218	4.15952	4.39529	4.48796	3.50005	4.3969	4.47759	4.29512	4.44615	3.90115	4.5859	4.15758
ID508	4.22521	4.0767	4.34991	3.57507	4.24339	4.30682	4.33122	3.60162	4.39783	4.4097	4.27922	4.44631	3.80579	4.50688	3.73296
ID509	4.27174	4.12297	4.33166	3.93777	4.29154	4.42076	4.53264	3.62418	4.4359	4.49677	4.37741	4.40796	3.70034	4.6093	4.22476
ID510	4.35465	4.22264	4.50232	3.99807	4.37602	4.5462	4.64791	3.78695	4.57787	4.61291	4.47141	4.5573	3.95703	4.7484	4.18109
ID511	4.30651	4.23987	4.38174	3.86441	4.29832	4.34536	4.55518	3.6885	4.37301	4.44643	4.31038	4.45724	4.04848	4.61697	3.97709
ID512	4.27806	4.30306	4.40903	4.00026	4.41417	4.4588	4.61052	3.74936	4.50251	4.48361	4.4174	4.50354	3.94483	4.73213	4.1527
ID513	4.29212	4.19743	4.38535	3.89755	4.1863	4.35173	4.48478	3.6656	4.28605	4.47496	4.23052	4.40638	4.12432	4.58088	4.00229
ID514	4.2414	4.225	4.31837	3.82837	4.29174	4.37893	4.49114	3.6761	4.46516	4.42113	4.38564	4.46042	3.80829	4.63135	4.00139
ID515	4.20365	4.12138	4.36046	3.66168	4.13071	4.27588	4.29812	3.73108	4.29671	4.38195	4.24669	4.39224	3.90087	4.51957	3.82342
ID516	4.15892	3.97874	4.2238	3.65564	4.05702	4.31062	4.38503	3.44112	4.37958	4.3798	4.15266	4.31903	3.47493	4.51222	3.99498
ID517	4.34802	3.99328	4.34664	3.92316	4.23338	4.36232	4.49028	3.49411	4.42898	4.39043	4.35836	4.46833	4.20368	4.61501	4.10313
ID518	4.32832	4.2553	4.38741	3.97582	4.26321	4.3895	4.52612	3.56423	4.46909	4.46762	4.37458	4.47148	4.13929	4.60414	4.08931
ID519	4.29538	4.08021	4.41384	3.9968	4.31058	4.43646	4.51923	3.60288	4.49046	4.52639	4.38177	4.47191	3.91529	4.65165	4.13575
ID520	3.95584	3.8833	4.1887	3.41194	4.08804	4.18737	4.27267	3.44031	4.20304	4.27499	4.16198	4.36225	3.54881	4.47305	3.5822
ID521	4.36225	4.26815	4.49324	4.04841	4.34024	4.50683	4.58536	3.59063	4.4719	4.62697	4.43432	4.46689	3.96146	4.6841	4.25481
ID522	4.35867	4.14576	4.43283	4.03851	4.42868	4.49466	4.57356	3.6185	4.5334	4.5619	4.51244	4.51564	3.91259	4.72854	4.27881
ID523	4.30609	4.25355	4.38324	3.9436	4.19885	4.41289	4.54464	3.61636	4.40007	4.52442	4.34696	4.40734	3.88268	4.50167	4.17689
ID524	4.17478	4.33053	4.34806	3.7965	4.25269	4.37304	4.46196	4.16052	4.43824	4.46647	4.34276	4.42621	3.78794	4.65171	3.98856
ID525	4.25218	4.1644	4.3452	3.81438	4.17818	4.31934	4.44141	3.65492	4.37176	4.39039	4.22718	4.38301	3.99043	4.48182	3.90883
ID526	4.35737	4.23795	4.44709	4.04855	4.16318	4.36006	4.55606	3.49915	4.41137	4.55357	4.40658	4.41425	4.04988	4.55591	4.19692
ID527	4.27655	4.24562	4.36821	3.86364	4.2109	4.31548	4.5199	3.71096	4.33184	4.42797	4.23704	4.4693	3.97929	4.55783	3.99736
ID528	4.32046	4.1084	4.35924	3.96091	4.2801	4.4745	4.53459	3.57666	4.47348	4.51676	4.44147	4.44292	3.78299	4.65373	4.24451
ID529	4.21656	3.91299	4.28072	3.89594	4.08658	4.27699	4.46502	3.42177	4.41844	4.33995	4.23218	4.31522	4.13277	4.50223	4.01122
ID530	4.30137	4.06796	4.38351	3.81755	4.25303	4.30212	4.43686	3.42966	4.29896	4.4163	4.25643	4.41867	4.09066	4.57118	3.99274
ID531	4.20913	4.08506	4.27087	3.72126	4.1138	4.33557	4.44865	3.60794	4.44184	4.35376	4.31057	4.43948	3.69126	4.62012	3.99043
ID532	4.4996	4.19513	4.58263	4.23054	4.52757	4.64918	4.71088	3.54228	4.67914	4.73551	4.57345	4.61853	4.13396	4.79579	4.34889
ID533	4.0891	3.97769	4.28074	3.65182	4.1368	4.27248	4.40237	3.45369	4.36171	4.36094	4.18917	4.36514	3.63935	4.57136	3.86819
ID534	4.32432	4.24521	4.43656	3.95323	4.37285	4.44734	4.55439	3.67769	4.48736	4.55036	4.3915	4.47997	3.95307	4.62611	4.08356
ID535	4.28676	3.8648	4.42209	3.90031	4.36999	4.40875	4.4568	3.53083	4.54241	4.46744	4.43944	4.51768	4.00133	4.68166	4.03269
ID536	4.29168	4.36507	4.49452	3.96612	4.33554	4.42566	4.5833	3.69473	4.43915	4.56016	4.36556	4.48494	3.91181	4.63495	4.06904
ID537	4.38227	4.24324	4.4544	4.07935	4.37128	4.46495	4.57865	3.59324	4.55388	4.59051	4.45832	4.4948	4.02632	4.67852	4.23916
ID538	4.39679	4.25971	4.45235	4.09931	4.28224	4.50233	4.64557	3.67358	4.52919	4.55721	4.39824	4.53208	4.00296	4.72329	4.3166
ID539	4.32267	4.0692	4.37683	3.98671	4.17908	4.43783	4.53401	3.50266	4.44917	4.51175	4.38875	4.37727	3.89693	4.51203	4.20983
ID540	4.48951	4.21664	4.53094	4.12454	4.47504	4.61318	4.66032	3.71722	4.59524	4.6701	4.51198	4.58492	4.0398	4.74578	4.33603
ID541	4.27299	4.33102	4.43872	4.02116	4.22589	4.36132	4.56796	3.75311	4.34326	4.50043	4.25978	4.46244	4.17021	4.59344	4.08604
ID542	4.32303	4.2406	4.41588	3.98922	4.30017	4.46956	4.6005	3.68976	4.48467	4.49167	4.42379	4.53726	3.95905	4.70037	4.21704
ID543	4.20968	4.36585	4.32754	3.73949	4.2479	4.24409	4.31253	4.02386	4.28635	4.38874	4.20587	4.36878	3.99093	4.43456	3.83202
ID544	4.43637	4.14993	4.54731	4.09014	4.26543	4.57659	4.615	3.62084	4.61722	4.64657	4.53019	4.56682	4.14719	4.7494	4.36289
ID545	4.27121	4.20818	4.35922	3.95352	4.21232	4.42239	4.59085	3.57542	4.35849	4.50786	4.30476	4.41763	3.87519	4.59246	4.1397
ID546	4.27905	4.12701	4.38991	3.9991	4.33395	4.40767	4.58002	3.5788	4.42649	4.47466	4.29134	4.42854	3.99868	4.60585	4.16478
ID547	4.36765	4.17746	4.42999	4.07493	4.31971	4.48352	4.53111	3.68062	4.49647	4.55957	4.42068	4.49807	4.05077	4.62109	4.19855
ID548	4.09607	3.9467	4.25032	3.63108	4.11003	4.30488	4.34167	3.42752	4.4067	4.35172	4.2417	4.35307	3.56337	4.57965	3.86681
ID549	4.49386	4.0087	4.54795	4.14526	4.50637	4.61875	4.54099	3.4286	4.65135	4.67685	4.60485	4.54709	4.06112	4.6742	4.30453
ID550	4.30453	4.26642	4.47043	4.03438	4.34843	4.48892	4.53311	3.68878	4.50213	4.59982	4.4645	4.4922	3.95604	4.68716	4.18668
ID551	4.33928	4.27139	4.46674	4.02089	4.32273	4.52241	4.61643	3.6765	4.49574	4.58455	4.41773	4.54928	3.97181	4.72753	4.30665
ID552	4.28589	4.16689	4.39454	3.74484	4.22132	4.40531	4.48877	3.67967	4.45192	4.46537	4.37082	4.41251	3.85197	4.61081	3.93365
ID553	4.283	4.09704	4.39434	3.93881	4.34694	4.44518	4.48023	3.55476	4.37448	4.51191	4.38068	4.45437	3.89599	4.64066	4.08512
ID554	4.17445	4.09945	4.34677	3.70714	4.16137	4.31037	4.44698	3.58152	4.39719	4.45263	4.27581	4.41988	3.72721	4.53543	3.93091
ID555	4.49855	4.3524	4.55916	4.10546	4.44768	4.62801	4.70306	3.78867	4.62152	4.70195	4.54945	4.62743	4.03124	4.83332	4.3668
ID556	4.12095	3.92455	4.23464	3.68785	4.09674	4.32154	4.40843	3.40375	4.35407	4.36824	4.23926	4.32442	3.65879	4.52236	3.94651
ID557	4.08306	3.84612	4.21637	3.25952	4.16711	4.23205	4.27275	3.4818	4.30548	4.33498	4.16887	4.37414	3.34264	4.60134	3.56987
ID558	4.31938	4.11844	4.51632	4.05507	4.33333	4.5656	4.62368	3.49746	4.57428	4.64451	4.48259	4.50242	4.11886	4.75508	4.2962
ID559	4.42779	4.27831	4.51393	4.15423	4.41372	4.60449	4.70296	3.62916	4.58102	4.63648	4.48536	4.54235	4.07047	4.73517	4.37319
ID560	4.34883	4.14275	4.43218	4.01301	4.29452	4.4632	4.56035	3.63843	4.47743	4.52692	4.34307	4.51738	3.98689	4.71106	4.19983
ID561	4.10752	3.9171	4.21474	3.2677	4.14886	4.2551	4.31848	3.54337	4.2921	4.29022	4.19277	4.36609	3.41619	4.53338	3.62652
ID562	4.18744	4.08746	4.40957	3.92688	4.23174	4.4075	4.53642	3.62031	4.41051	4.5035	4.33844	4.47656	3.9639	4.64539	4.03232
ID563	4.33625	4.26124	4.46333	4.0258	4.46293	4.57668	4.61631	3.67534	4.51103	4.64713	4.56871	4.51963	3.77298	4.7419	4.22928
ID564	4.32301	3.89565	4.38051	3.66208	4.30716	4.31562	4.48574	3.51359	4.52571	4.40745	4.29972	4.4838	3.85586	4.7	3.98204
ID565	4.27757	4.30252	4.36148	3.74714	4.23849	4.36517	4.36971	3.907	4.44949	4.43538	4.35792	4.41772	3.82236	4.57562	3.91268
ID566	4.17896	4.00119	4.34357	3.81627	4.31603	4.38256	4.51937	3.48357	4.46743	4.47103	4.3149	4.47312	3.7566	4.65742	4.00596
ID567	4.20116	4.17559	4.4061	3.719	4.2558	4.32672	4.53281	3.70141	4.39556	4.4845	4.21203	4.51761	3.77633	4.67847	3.90835
ID568	4.33973	4.06815	4.4283	3.90558	4.30279	4.34651	4.51355	3.62484	4.43295	4.39485	4.28935	4.46248	4.27483	4.57558	4.08961
ID569	4.22861	4.15607	4.32078	3.87388	4.20065	4.27521	4.39671	3.48146	4.30757	4.38714	4.21525	4.38754	3.96977	4.47832	3.95714
ID570	4.31687	4.22566	4.42678	4.03205	4.38319	4.48734	4.54624	3.7209	4.45826	4.54388	4.42243	4.50421	3.90134	4.65866	4.18926
ID571	4.26038	4.19106	4.36896	3.93399	4.20956	4.39529	4.50188	3.61123	4.42448	4.50009	4.34081	4.39583	3.88585	4.59876	4.14163
ID572	4.13673	4.54532	4.31426	3.79483	4.11358	4.23119	4.28864	NA	4.2839	4.30259	4.044	4.31551	3.98687	4.44077	3.90742
ID573	4.23831	4.31054	4.42202	3.91728	4.28678	4.30056	4.51525	3.66954	4.38626	4.44016	4.23035	4.45124	4.08099	4.60212	3.94989
ID574	4.06032	3.88392	4.24954	3.94972	3.91598	4.17456	4.39242	3.3778	4.13844	4.37535	4.04903	4.39148	3.87221	4.35791	4.03694
ID575	4.0688	4.0742	4.21212	3.68119	4.10781	4.25916	4.41518	3.58008	4.3166	4.34252	4.20135	4.34399	3.61562	4.55813	3.84572
ID576	4.24342	4.58141	4.42486	3.98058	4.24752	4.44975	4.58274	3.82544	4.4557	4.54143	4.3628	4.45668	3.89046	4.6444	4.17956
ID577	4.19772	4.18199	4.24626	3.73175	4.11992	4.23271	4.44895	3.58929	4.30098	4.32361	4.16957	4.39128	3.85434	4.57596	3.88545
ID578	4.29027	4.21844	4.3618	3.83712	4.22789	4.3977	4.52287	3.72745	4.44064	4.51933	4.34824	4.51476	3.73304	4.62498	4.08391
ID579	4.30669	3.99775	4.40249	4.01656	4.3141	4.42147	4.46792	3.43032	4.4941	4.49434	4.39935	4.48296	3.92185	4.62252	4.08486
ID580	4.19803	4.11108	4.31357	3.73365	4.16943	4.34023	4.45588	3.66469	4.40043	4.41878	4.32062	4.39405	3.70532	4.56747	3.96691
ID581	4.21172	4.09948	4.32612	3.79266	4.16606	4.27177	4.44202	3.50733	4.25612	4.39539	4.19722	4.39742	3.88294	4.50019	3.94837
ID582	4.27441	4.06926	4.41022	4.01962	4.1823	4.44034	4.49196	3.46401	4.47355	4.52961	4.38572	4.37257	3.99374	4.58213	4.1691
ID583	4.35765	4.22321	4.47671	4.08105	4.23988	4.50656	4.61826	3.50603	4.53781	4.63006	4.41612	4.52025	4.05452	4.66356	4.28579
ID584	4.32118	4.22335	4.47468	3.94457	4.42801	4.49398	4.5322	3.69682	4.52625	4.54702	4.42766	4.50226	3.93179	4.73804	4.17762
ID585	4.29561	4.25382	4.41798	3.84784	4.41101	4.47941	4.61319	3.56806	4.49538	4.57888	4.47747	4.47167	3.81775	4.68966	4.15606
ID586	4.2213	4.15692	4.27845	3.87033	4.07832	4.29677	4.44292	3.56715	4.33074	4.40087	4.24627	4.33191	3.84104	4.51896	4.0955
ID587	4.38222	4.19936	4.50291	4.11969	4.49598	4.59445	4.67403	3.5417	4.69797	4.64819	4.53469	4.56041	3.95427	4.75377	4.26755
ID588	4.29151	4.07513	4.39605	3.91197	4.12243	4.3681	4.53337	3.4273	4.41305	4.45046	4.4369	4.36985	3.95186	4.484	4.14768
ID589	4.19351	4.1671	4.39463	4.00941	4.2145	4.37724	4.51931	3.48829	4.42481	4.50869	4.33412	4.43347	4.02504	4.61898	4.06629
ID590	4.31179	4.15627	4.41753	3.93177	4.23017	4.30877	4.50804	3.51886	4.37812	4.46256	4.26641	4.40066	4.15017	4.54931	4.02905
ID591	4.15266	4.28891	4.39786	4.02908	4.31686	4.41182	4.60767	3.57865	4.40773	4.5496	4.29857	4.37854	3.89259	4.64262	4.08875
ID592	4.27581	4.39265	4.42681	3.89	4.44243	4.44433	4.49757	3.86788	4.48013	4.55047	4.40997	4.50183	3.78801	4.737	3.99897
ID593	4.14271	4.07178	4.2554	3.74132	4.14046	4.25961	4.4019	3.52846	4.36986	4.36753	4.23167	4.26588	3.5692	4.51149	3.92724
ID594	4.2868	4.05111	4.485	4.04856	4.30342	4.49407	4.51071	3.48269	4.53545	4.57072	4.46142	4.47504	4.07012	4.70045	4.17858
ID595	4.17091	4.17245	4.3196	3.82155	4.39705	4.36063	4.468	3.83477	4.37826	4.43476	4.32794	4.414	3.67706	4.60146	3.9952
ID596	4.20022	4.13176	4.2793	3.69878	4.18185	4.20173	4.37611	3.41781	4.29117	4.32814	4.2081	4.44034	3.88587	4.5772	3.88388
ID597	4.32224	4.34554	4.46359	4.09871	4.34053	4.50263	4.70466	3.70232	4.4535	4.58881	4.35458	4.55047	3.99541	4.67953	4.27657
ID598	4.26169	4.2811	4.44346	3.90419	4.32044	4.40026	4.51208	3.63993	4.43018	4.50676	4.33537	4.48052	4.02115	4.62292	3.99654
ID599	4.26283	4.1966	4.38387	3.94164	4.22959	4.40475	4.53063	3.52108	4.41229	4.49701	4.29363	4.37973	3.90978	4.65306	4.11387
ID600	4.39043	4.33866	4.46802	4.00377	4.36932	4.50712	4.53925	3.99371	4.50966	4.59791	4.47715	4.49234	4.04117	4.63624	4.29981
ID601	4.2264	4.12286	4.37662	3.96678	4.12923	4.31267	4.6381	3.63904	4.422	4.40888	4.24481	4.52983	4.09125	4.64987	4.08475
ID602	4.13398	4.06229	4.23629	3.7756	4.1433	4.22343	4.39627	3.5248	4.21871	4.31524	4.18644	4.33932	3.93236	4.5126	3.87699
ID603	4.31513	4.09613	4.38008	3.58378	4.30002	4.34411	4.34517	3.57577	4.36136	4.41205	4.28372	4.48937	3.84622	4.52487	3.74285
ID604	4.19549	4.13514	4.40128	3.94798	4.24891	4.39686	4.45823	3.43857	4.34467	4.50923	4.34361	4.42717	3.98044	4.57083	4.0282
ID605	4.37801	4.03778	4.39877	3.4095	4.335	4.36263	4.27653	3.63074	4.31606	4.45418	4.30286	4.49075	3.75125	4.55154	3.76171
ID606	4.27933	4.01644	4.38044	4.0042	4.17838	4.46276	4.53652	3.40865	4.51194	4.56081	4.38211	4.39705	3.84909	4.55879	4.16716
ID607	4.33158	4.01885	4.439	4.02598	4.37573	4.52961	4.52212	3.49095	4.54795	4.58627	4.47633	4.50792	3.8849	4.71045	4.17923
ID608	4.17599	4.14647	4.25853	3.85289	4.18641	4.2507	4.52654	3.43776	4.26096	4.45683	4.12423	4.31884	3.74331	4.51812	4.02908
ID609	4.26304	4.15488	4.35155	3.63755	4.23836	4.30788	4.35229	3.675	4.24688	4.37998	4.18481	4.42648	3.84873	4.51671	3.80245
ID610	4.33695	4.15399	4.22996	3.96487	4.17666	4.42475	4.43611	3.46171	4.44738	4.49987	4.3352	4.38337	3.96186	4.60777	4.17048
ID611	4.24491	4.33099	4.42202	3.8526	4.27525	4.33634	4.48644	3.69247	4.39613	4.45294	4.30421	4.51441	3.98564	4.58852	3.92633
ID612	4.12378	4.00675	4.23382	3.76669	4.12889	4.2172	4.39952	3.38174	4.28255	4.31089	4.14406	4.26619	3.90135	4.497	3.89629
ID613	4.25515	4.02603	4.34462	3.93462	4.12917	4.35914	4.42633	3.44253	4.37594	4.45869	4.3007	4.31867	3.93032	4.5609	4.12901
ID614	4.2782	4.134	4.35866	3.97215	4.19124	4.39331	4.52134	3.53348	4.46455	4.4879	4.33412	4.37415	3.91915	4.58117	4.15922
ID615	4.20616	4.01962	4.36755	3.87658	4.2012	4.35972	4.45972	3.32912	4.50162	4.47766	4.2881	4.36261	3.98509	4.45744	4.09448
ID616	4.25184	3.97144	4.28257	3.6803	4.10022	4.23996	4.37173	3.46775	4.37992	4.35632	4.29114	4.37221	3.87239	4.46827	3.86688
ID617	4.29161	4.42176	4.4048	3.82096	4.23131	4.3427	4.48526	NA	4.43142	4.44956	4.32016	4.43238	3.94037	4.52537	3.96381
ID618	4.11433	4.06983	4.39838	3.41672	4.30146	4.35801	4.40402	3.64172	4.37523	4.42677	4.31197	4.46997	3.6319	4.63067	3.6782
ID619	4.27217	4.16707	4.42059	4.03734	4.32265	4.4868	4.56234	3.69245	4.45419	4.52818	4.43404	4.47349	3.93379	4.71348	4.16671
ID620	4.36413	4.25724	4.47347	4.05295	4.38433	4.52319	4.65902	3.70734	4.57249	4.5647	4.42655	4.59286	3.92109	4.80677	4.27337
ID621	4.194	3.98221	4.30392	3.77522	4.17464	4.27325	4.42311	3.59743	4.36408	4.31064	4.20992	4.39176	3.92537	4.61582	3.96708
ID622	4.24924	4.21786	4.33223	3.88458	4.18911	4.4062	4.48158	3.59486	4.44143	4.475	4.36782	4.34357	3.74079	4.57342	4.15382
ID623	4.27306	4.18859	4.4275	3.89123	4.22197	4.39729	4.51837	3.67925	4.4126	4.4686	4.35794	4.49333	3.95401	4.67299	4.03583
ID624	4.54735	4.20181	4.60788	4.16777	4.47088	4.64348	4.7586	3.58405	4.63236	4.76232	4.57073	4.68029	4.13372	4.8627	4.37179
ID625	4.11888	3.9983	4.2749	3.71342	4.15524	4.29634	4.4197	3.50902	4.28854	4.38934	4.24995	4.35685	3.67735	4.5667	3.94635
ID626	4.21002	4.25388	4.3468	3.58147	4.26065	4.39576	4.42952	3.89026	4.34129	4.47053	4.29058	4.47198	3.55101	4.59656	3.85774
ID627	4.16304	3.97949	4.28233	3.41878	4.20622	4.29399	4.34279	3.5573	4.3299	4.37527	4.23405	4.3735	3.51986	4.54361	3.71945
ID628	4.44358	4.24852	4.55856	4.27208	4.32846	4.59727	4.70612	3.5685	4.6416	4.69733	4.52446	4.60171	4.19184	4.71902	4.37949
ID629	4.37514	4.36833	4.50366	4.08364	4.37874	4.49758	4.60523	3.62189	4.49571	4.62062	4.43953	4.49448	4.01833	4.71751	4.24933
ID630	4.3126	4.22122	4.43461	4.07424	4.23174	4.46607	4.57619	3.56608	4.51921	4.58501	4.40751	4.46486	4.00818	4.65659	4.22379
ID631	4.24306	4.26679	4.37476	3.95833	4.2554	4.38999	4.53204	3.62407	4.42539	4.48065	4.27841	4.36621	3.87105	4.64895	4.12613
ID632	4.27097	4.08323	4.35114	3.95471	4.14628	4.39063	4.49035	3.51734	4.41949	4.42874	4.31311	4.41868	3.90097	4.59408	4.16996
ID633	4.10936	4.02353	4.19276	3.7715	4.09611	4.24654	4.34246	3.49051	4.29809	4.3516	4.20635	4.28893	3.59737	4.46952	3.98556
ID634	4.26885	4.17608	4.35661	3.93558	4.22327	4.3944	4.47326	3.52394	4.4353	4.47017	4.33104	4.34112	3.92523	4.55361	4.11026
ID635	4.24759	4.10284	4.34339	3.70478	4.14907	4.29251	4.38728	3.52726	4.33986	4.37761	4.22831	4.43473	3.88524	4.5615	3.87218
ID636	4.27925	3.9187	4.34489	3.84713	4.20447	4.33299	4.44663	3.34446	4.39695	4.42209	4.28056	4.40228	3.86814	4.51998	4.14183
ID637	4.25736	4.15131	4.40053	4.04357	4.28412	4.40436	4.53116	3.57817	4.47256	4.52511	4.38445	4.447	4.00098	4.62747	4.15163
ID638	4.3489	4.34792	4.4836	4.0868	4.30136	4.51291	4.67952	3.70692	4.54362	4.6208	4.42911	4.51903	4.02216	4.66986	4.28275
ID639	4.29092	4.09525	4.41808	4.07142	4.26342	4.43776	4.48395	3.46976	4.47974	4.56222	4.38589	4.41493	4.03506	4.57629	4.18021
ID640	4.20146	4.27072	4.34881	3.89578	4.10451	4.29228	4.48819	3.72802	4.43992	4.4402	4.26325	4.36482	3.92415	4.61679	3.99139
ID641	4.24625	4.12509	4.35611	3.74539	4.1339	4.34563	4.54756	3.59747	4.37126	4.48087	4.26127	4.50429	3.72194	4.55596	4.00306
ID642	4.26307	4.08673	4.33793	3.94286	4.18792	4.38644	4.48785	3.48122	4.39345	4.44074	4.35768	4.37226	3.90062	4.58162	4.17715
ID643	4.23079	4.18464	4.3711	3.84851	4.14356	4.28853	4.4284	3.51197	4.36399	4.35301	4.24353	4.44098	4.04748	4.56311	3.97981
ID644	4.36372	4.11907	4.39839	4.08037	4.21777	4.44002	4.51308	3.52338	4.501	4.55032	4.29766	4.42481	4.00549	4.63598	4.25819
ID645	4.27866	4.18703	4.44323	4.0114	4.17945	4.43212	4.53535	3.53843	4.47178	4.54061	4.34834	4.4288	4.00578	4.62771	4.18709
ID646	4.1037	4.57295	4.22519	3.74278	4.08352	4.26701	4.3285	NA	4.33711	4.33795	4.19882	4.28427	3.70285	4.50455	3.91484
ID647	4.35328	4.04954	4.43048	3.94902	4.22125	4.44115	4.49762	3.57426	4.45902	4.52646	4.44146	4.47201	3.92443	4.61279	4.21346
ID648	4.22627	4.12279	4.31166	3.85156	4.15316	4.31048	4.44347	3.5391	4.36646	4.39203	4.29715	4.30801	3.81242	4.50542	4.09573
ID649	4.32226	4.26178	4.44837	4.05064	4.37234	4.55439	4.64126	3.62379	4.52254	4.60992	4.49626	4.49877	3.78543	4.73487	4.31018
ID650	4.27938	4.11031	4.3656	3.74705	4.20198	4.33791	4.39858	3.6129	4.39956	4.38681	4.29814	4.42728	3.98514	4.5986	3.90747
ID651	4.37064	4.30027	4.39381	3.97562	4.27893	4.44479	4.53486	3.62315	4.53229	4.51266	4.38253	4.4449	4.00361	4.64194	4.2231
ID652	4.21643	4.18475	4.3546	3.70451	4.29748	4.37501	4.45321	3.59702	4.42248	4.4542	4.32068	4.41566	3.76997	4.60611	3.86155
ID653	4.25269	4.1477	4.40937	3.77317	4.27193	4.31596	4.46244	3.55198	4.33925	4.4371	4.28359	4.50232	3.95012	4.58646	3.91992

## Sheet: TwinsUK_LCL
	MTND6	MTRNR2	MTATP6	MTND4L	MTND3	MTCYB	MTCO1	MTRNR1	MTND1	MTND4	MTND2	MTCO2	MTATP8	MTCO3	MTND5
ID1	4.0515	4.40101	4.3438	3.95728	3.96475	4.16764	4.53709	3.76516	4.3288	4.58259	4.14056	4.47658	3.89714	4.51486	4.01102
ID2	3.95235	4.1446	4.22683	3.79309	3.79219	4.11058	4.34213	3.44991	4.19646	4.34544	4.04858	4.37577	3.82968	4.3994	3.8918
ID3	3.99565	4.3579	4.25349	3.96364	3.84821	3.85755	4.43873	3.62868	4.00248	4.41056	3.83151	4.3855	3.95324	4.41351	3.9314
ID4	3.98631	4.11396	4.221	3.87462	3.82385	4.14573	4.39194	3.39701	4.07827	4.41718	3.96734	4.43218	3.73731	4.37266	3.96862
ID5	3.86598	4.17898	4.26408	3.93626	3.85797	4.12342	4.38083	3.56553	4.1947	4.45426	4.04122	4.4213	3.82195	4.44192	3.88916
ID6	3.95218	4.28946	4.26684	3.89112	3.74973	4.06304	4.38192	3.72497	4.15808	4.36343	4.01373	4.36001	3.77764	4.39382	3.96418
ID7	3.99588	4.27051	4.25863	3.99806	3.81463	3.99802	4.49931	3.66952	4.08589	4.4166	3.91159	4.39773	4.02748	4.36515	3.95278
ID8	3.89096	4.10484	4.25079	3.97382	3.74564	3.9747	4.37654	3.32193	3.96937	4.35317	3.74838	4.41618	4.04443	4.40566	3.90124
ID9	3.92967	4.41534	4.14493	3.87118	3.76686	3.88691	4.3957	3.80242	3.98756	4.39496	3.79341	4.34508	3.70703	4.31111	3.8924
ID10	4.00947	4.21037	4.35766	3.92854	3.96051	4.08636	4.4215	3.55316	4.191	4.40934	4.11389	4.4956	4.02559	4.484	3.95046
ID11	3.87792	4.1184	4.25162	3.92918	3.73101	4.03943	4.43988	3.34349	4.03781	4.36318	3.79491	4.41065	3.76366	4.42429	3.89185
ID12	4.09781	4.26966	4.36907	3.93218	3.91566	4.15339	4.53354	3.65794	4.18833	4.5707	4.01686	4.49642	3.90032	4.54101	4.04813
ID13	3.96627	4.29699	4.19089	3.94949	3.78676	3.87849	4.47212	3.61632	3.88828	4.28973	3.7596	4.37649	4.02293	4.34601	3.98178
ID14	3.89363	4.1936	4.20879	3.95762	3.7023	3.98232	4.41942	3.64775	3.97813	4.40003	3.84767	4.37741	3.71674	4.38536	3.94981
ID15	3.73078	4.24888	3.81477	3.75906	3.44554	NA	4.18394	3.59781	3.68646	4.1341	3.41063	4.01477	3.56109	NA	3.69157
ID16	3.92362	4.12492	4.12974	3.70372	3.73264	3.96337	4.41096	3.53928	4.06539	4.33874	3.96005	4.29281	3.46986	4.42124	3.92202
ID17	3.76047	4.24869	3.84855	NA	3.81613	3.56861	4.19669	3.79397	3.90979	4.03858	3.68204	4.21622	3.3024	4.21712	3.5275
ID18	3.85778	4.19736	4.00514	3.63215	3.71102	3.75381	4.31067	3.69924	3.94839	4.23818	3.702	4.21668	3.48252	4.21522	3.74689
ID19	3.87248	4.04198	4.16851	3.46588	3.82758	3.94334	4.19761	3.54981	3.85585	4.25184	3.8202	4.37761	3.69034	4.39283	3.6713
ID20	4.06912	4.40684	4.36804	3.91992	4.03954	4.11154	4.38451	3.69091	4.27305	4.54329	4.10071	4.61089	3.98815	4.54981	3.80552
ID21	4.09091	4.26657	4.3259	3.68775	4.10649	3.94971	4.34325	3.65517	4.1298	4.44319	3.82967	4.60539	3.71516	4.60641	3.6438
ID22	3.85786	4.21041	4.12788	3.64888	3.82228	4.03709	4.48019	3.64246	4.03723	4.41577	3.88975	4.363	3.28335	4.44098	3.84276
ID23	3.86765	4.30693	3.93524	3.79583	3.64558	3.70566	4.27281	3.658	3.86753	4.16816	3.67384	4.12127	3.72321	4.1007	3.81969
ID24	4.10812	4.41282	4.24893	3.92163	3.86563	3.97096	4.51061	3.97286	4.1291	4.4749	3.93646	4.39141	3.88745	4.37024	4.13516
ID25	3.91112	4.43876	4.07237	3.85507	3.74603	3.83508	4.37598	3.87503	4.10143	4.32176	3.85901	4.27721	3.68392	4.30907	3.89691
ID26	4.13219	4.2542	4.37264	3.95959	4.02101	4.2282	4.50985	3.59305	4.18317	4.55059	4.08282	4.52141	3.88066	4.61094	3.98264
ID27	4.12662	4.75749	4.23102	3.76109	3.88842	3.90137	4.41077	NA	4.13519	4.42881	3.8847	4.47242	3.76774	4.41436	3.80814
ID28	4.12422	4.31683	4.31118	3.99119	3.91378	4.17931	4.49978	3.77531	4.20053	4.56313	4.01545	4.46312	3.85554	4.50967	3.99848
ID29	3.90845	4.24491	4.11645	3.9142	3.81559	3.87737	4.36477	3.56677	3.97529	4.32279	3.81084	4.26514	3.66497	4.34335	3.91719
ID30	3.83077	4.15158	4.08208	3.64149	3.70172	3.93305	4.42495	3.54015	3.9014	4.31838	3.75379	4.27256	3.35565	4.40488	3.88209
ID31	4.02004	4.1556	4.26616	4.03165	3.76385	4.10604	4.45649	3.39205	4.00797	4.39164	3.85062	4.37844	4.03289	4.39634	4.04669
ID32	3.91585	4.34576	4.197	4.00615	3.8328	3.79809	4.47514	3.5144	3.90079	4.35846	3.7244	4.39279	3.88794	4.34815	3.9
ID33	3.73254	4.32841	3.92496	3.68393	3.72822	3.79234	4.31533	3.81786	3.89928	4.3176	3.72083	4.19179	3.27236	4.254	3.73618
ID34	4.00564	4.1728	4.36719	4.00594	3.84686	4.13103	4.46664	3.47786	4.11639	4.54892	3.98651	4.49896	3.82734	4.50926	4.06898
ID35	3.99245	4.10322	4.41149	3.95093	3.90615	4.13365	4.50053	3.34694	4.17756	4.52405	4.00306	4.53286	3.97623	4.61398	3.95272
ID36	3.7812	3.95803	3.93347	3.53749	3.50823	3.76126	4.34685	3.52707	3.74458	4.15838	3.6129	4.12557	3.33188	4.19811	3.85532
ID37	3.85429	4.172	4.25172	3.98919	3.83352	3.95223	4.35983	3.46202	4.03377	4.30979	4.02004	4.36012	4.06963	4.3467	3.89696
ID38	3.99916	4.3885	4.24505	3.94656	3.9822	4.0736	4.55486	3.84015	4.26273	4.46387	4.041	4.47267	3.84183	4.48427	3.89901
ID39	3.8685	4.19706	4.14303	3.9558	3.67811	3.8782	4.43686	3.56348	3.94221	4.38712	3.7353	4.34796	3.76313	4.36752	3.92385
ID40	3.91355	4.32132	4.24273	3.99251	3.75977	3.84088	4.4244	3.67261	4.0461	4.43531	3.92244	4.40503	3.98808	4.33453	3.89472
ID41	3.80662	4.06173	4.22523	3.90206	3.71996	3.9773	4.31878	3.48364	3.98079	4.27579	3.87513	4.32846	3.78692	4.38729	3.85784
ID42	3.977	4.40941	4.2456	4.10315	3.90205	3.99935	4.48047	3.62164	4.06182	4.47521	3.87542	4.42021	4.08118	4.43458	3.97226
ID43	3.99353	4.24246	4.40618	4.06247	3.93867	4.10692	4.53233	3.45413	4.13521	4.49177	4.02784	4.47189	4.12581	4.50466	3.94349
ID44	3.97633	4.26083	4.35548	3.90243	3.93423	4.08546	4.48546	3.61856	4.15857	4.53178	4.0195	4.55855	4.06721	4.53152	3.90394
ID45	3.98081	4.26307	4.2942	4.00652	3.79595	4.02361	4.43689	3.61723	4.00661	4.39034	3.83101	4.47265	4.013	4.44324	3.9855
ID46	3.92117	4.11216	4.2307	3.96725	3.765	3.95964	4.35206	3.45302	4.04997	4.36629	3.82734	4.37161	3.85688	4.36219	3.92411
ID47	3.95714	4.19494	4.26403	4.03789	3.80403	4.06561	4.42857	3.3718	4.0477	4.41313	3.87299	4.39914	4.01771	4.41973	4.00666
ID48	3.879	4.34635	4.18146	3.65262	3.77145	3.86132	4.33162	3.87297	3.96246	4.25322	3.80801	4.28569	3.61688	4.3409	3.74054
ID49	3.99624	4.40935	4.35104	3.84121	3.84998	3.99594	4.386	3.89351	4.18428	4.44025	3.91531	4.38387	3.89134	4.43337	3.96353
ID50	3.92624	4.31833	4.06083	3.76779	3.69089	3.79126	4.32617	3.66757	4.09306	4.31996	3.86373	4.16374	3.65063	4.25464	3.88084
ID51	3.84282	4.34271	4.17018	3.88873	3.87103	3.90211	4.39721	3.73441	4.09124	4.41079	3.92066	4.36841	3.73327	4.46436	3.82479
ID52	3.92073	4.15497	4.2399	3.88437	3.85721	4.0803	4.39929	3.52712	4.02516	4.38581	3.8952	4.38544	3.8681	4.48264	3.95454
ID53	3.93414	4.20687	4.20899	3.91175	3.60411	3.90568	4.40813	3.48892	3.84158	4.37112	3.7061	4.36848	3.84448	4.29089	3.91694
ID54	3.87618	4.13714	4.22988	3.90245	3.77663	4.05624	4.40453	3.51015	4.0679	4.38944	3.88032	4.34206	3.83249	4.46223	3.91822
ID55	3.78571	4.0584	4.11535	3.82781	3.75256	3.93076	4.37045	3.43586	4.05176	4.37905	3.83981	4.31716	3.56189	4.41781	3.81405
ID56	3.89107	4.25183	4.19651	3.95614	3.73555	3.97429	4.3874	3.61554	4.13608	4.37464	3.89607	4.31951	3.86498	4.33913	3.88457
ID57	4.23489	4.48403	4.55577	4.07437	4.21427	4.26397	4.63218	3.71043	4.29985	4.67288	4.20196	4.74568	4.24675	4.77063	4.05805
ID58	3.91329	4.40188	4.10915	3.47841	3.99391	3.79311	4.30378	3.79544	4.18527	4.32505	3.92474	4.3551	3.49125	4.4595	3.64678
ID59	3.96098	4.27509	4.4026	3.90486	3.91429	4.2336	4.52079	3.6702	4.22627	4.59073	4.11008	4.52965	3.96545	4.62054	3.99186
ID60	4.05639	4.40517	4.36782	3.99941	3.86551	4.07025	4.50155	3.69789	4.08293	4.60444	3.95612	4.51518	3.99649	4.51941	4.04937
ID61	3.89998	4.19397	4.23922	3.90953	3.80469	4.06075	4.47668	3.40211	4.07795	4.42501	3.89848	4.42605	3.67481	4.4714	3.96026
ID62	3.93419	4.18793	4.13238	3.73923	3.81192	3.93598	4.42817	3.5596	4.10792	4.34442	3.93871	4.31639	3.49609	4.42265	3.92564
ID63	4.02012	4.3641	4.24366	3.96074	4.00599	4.01457	4.52855	3.57167	4.20993	4.48041	3.93391	4.47469	3.816	4.48601	3.94303
ID64	3.88795	4.31988	4.11799	3.88022	3.79881	3.74821	4.34734	3.63601	3.97852	4.27119	3.79669	4.21847	3.86818	4.24808	3.85597
ID65	3.89549	4.12081	4.28648	3.94082	3.85324	4.15248	4.44149	3.51018	4.21746	4.46829	3.99442	4.47839	3.92021	4.5574	3.97472
ID66	4.09539	4.39623	4.32164	3.99886	3.9905	4.10399	4.5296	3.65579	4.24595	4.55166	4.01599	4.53496	4.01421	4.50975	3.91
ID67	3.88695	4.31563	4.14007	3.74997	3.83956	3.93769	4.39017	3.73696	4.07874	4.41575	3.88098	4.3917	3.56234	4.38375	3.72266
ID68	3.93925	4.52274	4.08525	3.78951	3.75103	3.76857	4.3501	3.92125	4.11104	4.31839	3.84278	4.23245	3.61406	4.27195	3.92278
ID69	3.75734	4.20535	4.11962	3.86601	3.75726	3.92264	4.38932	3.56549	3.99853	4.3589	3.85976	4.3213	3.73979	4.33945	3.85377
ID70	3.67257	3.86455	3.89823	3.69965	3.55062	3.84971	4.25803	3.27109	3.94238	4.30009	3.75632	4.22011	3.35545	4.39085	3.77992
ID71	3.99552	4.31864	4.3245	3.81837	3.8616	4.14368	4.49734	3.55417	4.28148	4.47296	4.02	4.51231	3.81818	4.53237	3.95568
ID72	4.13495	4.36152	4.55198	4.11115	4.01294	4.11662	4.61835	3.70491	4.12145	4.58454	3.91503	4.63422	4.24104	4.58336	4.00118
ID73	3.96958	NA	4.02324	3.82081	3.51077	3.9762	4.178	NA	4.14658	4.3115	3.90505	4.1679	3.65393	4.19469	4.0652
ID74	3.92537	4.38716	4.20569	3.91885	3.79642	3.95874	4.45206	3.83124	4.14554	4.40779	3.95478	4.34748	3.79583	4.43606	3.90434
ID75	3.92531	4.03207	4.26343	3.84799	3.88919	4.0297	4.43001	3.39398	4.14671	4.40043	3.97055	4.41612	3.824	4.49577	3.92231
ID76	3.76733	4.28247	4.16724	4.04479	3.83602	3.9178	4.35615	3.55362	3.93424	4.31644	3.85469	4.33238	4.00246	4.30521	3.76244
ID77	3.89638	4.15618	4.30042	3.95832	3.72044	3.9989	4.40657	3.36296	4.11182	4.36644	3.84318	4.41511	3.94771	4.46799	3.89537
ID78	3.98092	4.24946	4.37348	4.03824	3.91284	4.17901	4.54825	3.47811	4.12102	4.5529	4.03103	4.50483	4.01024	4.58323	4.02054
ID79	4.0704	4.25696	4.31177	4.02549	3.92853	4.05113	4.46428	3.72503	4.09474	4.45213	3.88529	4.44255	4.04651	4.47539	3.95041
ID80	4.08753	4.28473	4.37847	4.00872	3.91404	4.24185	4.49481	3.69766	4.2728	4.5808	4.09606	4.5396	4.02742	4.53504	4.08209
ID81	3.98401	4.30157	4.2881	3.92382	3.82768	4.07415	4.55648	3.64074	4.10737	4.57281	3.94858	4.48978	3.86213	4.51542	4.02863
ID82	4.1009	4.57615	4.21488	3.72048	4.06561	3.9687	4.48245	3.99717	4.29376	4.49661	4.02577	4.4688	3.58462	4.49202	3.83904
ID83	3.91362	4.17338	4.19609	3.90215	3.77295	3.97598	4.38838	3.49931	4.02155	4.37993	3.8253	4.32282	3.78984	4.42148	3.90957
ID84	4.0515	4.47053	4.21711	3.97456	3.95202	3.95796	4.55194	3.79069	4.14381	4.55814	3.9187	4.48344	3.73257	4.44193	3.99583
ID85	4.16158	4.41125	4.36386	3.9126	4.00803	4.07601	4.51252	3.64974	4.19442	4.53033	4.05763	4.56898	4.02042	4.51618	3.94676
ID86	3.88522	4.24205	4.31374	4.13452	3.78177	4.00136	4.45318	3.42542	4.05403	4.44079	3.93011	4.43881	4.16037	4.43192	3.97344
ID87	3.95008	4.42397	4.22635	3.9868	3.76151	3.92219	4.43495	3.80914	3.94053	4.37907	3.83493	4.38235	4.056	4.36123	3.96779
ID88	3.87974	4.31476	4.24318	4.01581	3.78867	3.99502	4.40614	3.67438	4.10198	4.39765	3.90854	4.4001	4.09238	4.43282	3.93733
ID89	3.79053	4.18101	4.07211	3.79495	3.79231	3.98104	4.43609	3.65662	4.0554	4.34738	3.86151	4.28583	3.41236	4.42917	3.89896
ID90	3.88424	4.22324	4.17665	3.96567	3.71431	3.8832	4.36111	3.59542	3.85815	4.31896	3.73552	4.30709	3.93557	4.25986	3.89986
ID91	3.88141	4.4759	4.30918	3.94946	3.87395	4.13416	4.49412	3.98003	4.3075	4.57649	4.06183	4.49561	3.82377	4.41624	3.90704
ID92	3.90108	4.15712	4.24144	3.9619	3.78526	3.95639	4.40826	3.41009	4.04525	4.31688	3.90828	4.40465	3.96593	4.38786	3.95322
ID93	3.68407	4.12212	4.02882	3.40607	3.59707	3.96501	4.33012	3.61053	3.8783	4.33418	3.76076	4.28634	3.11259	4.35855	3.6584
ID94	4.00925	4.13257	4.3253	3.84562	3.86671	4.10954	4.4746	3.43352	4.05661	4.39759	3.94464	4.44745	4.07924	4.46131	3.9102
ID95	3.8915	4.17361	4.0456	3.92974	3.65422	3.72655	4.32221	3.48243	3.83574	4.31724	3.66086	4.20326	3.81804	4.15058	3.89517
ID96	3.98776	4.38064	4.36405	3.94971	3.92196	4.16338	4.59075	3.69074	4.21669	4.57335	4.03606	4.59382	3.96309	4.56569	3.99618
ID97	4.11978	4.55137	4.24969	3.80699	3.98105	3.85899	4.461	3.89363	4.25385	4.4779	3.90529	4.51485	3.8435	4.48685	3.73481
ID98	4.04163	4.45346	4.20129	3.97189	3.83649	3.95023	4.42684	3.89645	4.03563	4.41969	3.83841	4.37746	3.96048	4.39858	3.95381
ID99	4.04164	4.17628	4.308	4.01411	3.87131	4.06628	4.4892	3.4206	4.08247	4.39297	3.90499	4.40232	4.0929	4.41545	4.01391
ID100	3.94382	4.33191	4.24699	4.03533	3.88465	3.88609	4.47774	3.48913	3.97703	4.4221	3.82439	4.43829	4.02316	4.40329	3.9411
ID101	3.94863	4.35594	4.23792	3.97697	3.85375	4.00299	4.51522	3.72103	4.03232	4.51363	3.86683	4.49449	3.82812	4.391	4.03492
ID102	3.98947	4.46414	4.25702	3.95016	3.86406	3.94454	4.40564	3.84188	4.17446	4.39069	3.98108	4.40049	3.98514	4.39553	3.9393
ID103	4.04869	4.4123	4.42969	4.03604	3.99931	4.18271	4.58874	3.76624	4.26749	4.58614	4.10649	4.61032	4.0199	4.64205	4.0197
ID104	3.88812	4.17355	4.18902	3.9007	3.79756	4.02703	4.42252	3.38455	4.05041	4.39275	3.83798	4.41158	3.90856	4.42791	3.7792
ID105	4.02889	4.26843	4.24144	4.02873	3.86106	4.03202	4.45038	3.53069	4.05934	4.42719	3.92721	4.42093	4.03633	4.38275	4.03678
ID106	3.69026	4.21859	3.97954	3.65717	3.63937	3.87378	4.32512	3.82763	3.92477	4.29205	3.77068	4.17071	3.33085	4.33478	3.73476
ID107	4.1187	4.22371	4.27301	3.90931	3.89794	4.05671	4.41965	3.48761	4.09644	4.39154	3.89916	4.37288	3.94713	4.4298	4.02725
ID108	3.94602	4.43796	4.17874	4.03854	3.85162	3.91004	4.39636	3.71005	4.08219	4.42363	3.91114	4.34992	3.98573	4.331	3.90934
ID109	3.92804	4.25923	4.0776	3.8878	3.65399	3.84768	4.37148	3.77257	3.91005	4.34452	3.70372	4.24772	3.7337	4.2584	3.84908
ID110	4.00527	4.37791	4.1859	4.02124	3.81935	3.84356	4.45538	3.68316	3.97804	4.37785	3.7906	4.36047	3.95254	4.33285	3.97091
ID111	3.98411	4.39609	4.3041	NA	4.22472	4.03534	4.43054	3.7907	4.38223	4.5491	4.14875	4.67236	3.44427	4.71156	NA
ID112	3.94043	4.17081	4.11668	3.96631	3.65894	3.87855	4.42876	3.44897	3.91427	4.36269	3.763	4.36654	3.91784	4.2649	3.94224
ID113	3.92104	4.20645	4.23675	3.98313	3.73022	3.94813	4.34466	3.52985	4.04663	4.36565	3.87674	4.23612	3.97892	4.39777	3.92402
ID114	3.9347	4.2847	4.23868	3.87943	3.77197	4.05211	4.46561	3.58308	4.14306	4.47638	3.94393	4.43448	3.90423	4.43436	4.00394
ID115	4.0756	4.32429	4.40021	4.15007	3.92826	4.06148	4.55498	3.57451	4.1445	4.54189	4.01348	4.54039	4.13016	4.53769	4.01624
ID116	3.98354	4.28213	4.28238	3.94606	3.86974	4.12803	4.41303	3.53911	4.13888	4.46348	3.91111	4.44603	3.8181	4.47048	3.96565
ID117	4.01942	4.27866	4.36149	4.0001	3.83957	4.06545	4.46266	3.60155	4.09601	4.45482	3.92309	4.46657	4.08982	4.59278	3.94623
ID118	3.97143	4.32966	4.10649	3.82896	3.67566	3.8087	4.35273	3.75224	4.0432	4.36813	3.76511	4.27526	3.59187	4.26182	3.92671
ID119	3.85969	4.0987	4.22179	3.88056	3.74034	4.0443	4.38565	3.61129	4.11159	4.35196	4.0203	4.34402	3.64761	4.40842	3.91676
ID120	3.97013	4.27554	4.16871	3.46826	3.90816	3.87339	4.3657	3.76565	3.96661	4.1967	3.83542	4.32647	3.78931	4.34242	3.60646
ID121	3.54343	4.14051	3.96853	3.80387	3.69081	3.77133	4.30487	3.40061	4.00648	4.3361	3.75449	4.22228	3.41278	4.33688	3.65276
ID122	3.93289	4.10059	4.22176	3.85066	3.79291	4.05341	4.41909	3.43727	4.05453	4.40115	3.94317	4.39171	3.70018	4.44313	3.91973
ID123	4.12107	4.46965	4.21811	3.86015	3.86299	3.83908	4.45519	3.89033	4.11201	4.41734	3.84039	4.32174	3.79805	4.36955	3.86849
ID124	4.06591	4.36614	4.29824	3.97625	3.99076	4.04693	4.51412	3.71461	4.17776	4.40953	3.99054	4.4382	4.04674	4.51051	3.93173
ID125	3.94124	4.38475	4.23224	3.80729	3.81863	4.07594	4.53544	3.80554	4.12337	4.47617	3.90759	4.44576	3.76066	4.4631	4.02825
ID126	3.96741	4.17268	4.20095	3.84912	3.7728	3.96063	4.41056	3.58467	3.95694	4.31458	3.79664	4.36587	3.90619	4.36898	3.84316
ID127	3.94933	4.19868	4.26226	3.9722	3.63014	3.95906	4.46512	3.39773	3.93793	4.37171	3.73323	4.37204	3.88077	4.40866	3.97645
ID128	3.9515	4.19868	4.26206	3.99782	3.78561	3.95405	4.39007	3.32984	4.09372	4.36546	3.90633	4.33462	4.07125	4.42301	3.92729
ID129	3.82891	4.18753	3.99624	3.75203	3.59107	3.7383	4.24077	3.48407	3.90819	4.15178	3.73022	4.08092	3.74276	4.09451	3.8588
ID130	3.85464	4.24946	4.28759	3.99963	3.7459	3.9775	4.35959	3.74352	3.92185	4.39781	3.76582	4.42116	3.95892	4.4173	3.8701
ID131	3.96089	4.16093	4.21366	3.92357	3.84734	3.84867	4.38038	3.5047	3.93782	4.31491	3.77992	4.34956	3.79226	4.35892	3.91026
ID132	3.85989	4.34308	4.07166	NA	4.23704	3.72356	4.23938	3.88416	4.18132	4.21313	3.91668	4.52751	3.0756	4.53787	NA
ID133	3.95534	4.15986	4.20822	3.95873	3.83725	4.02203	4.46236	3.60601	4.07179	4.41346	3.86418	4.3887	3.7827	4.42758	3.99933
ID134	3.97665	4.37461	4.06268	3.67201	3.75541	3.95135	4.4771	3.80451	3.94979	4.41953	3.81952	4.31191	3.30112	4.34238	3.93896
ID135	3.91839	4.31412	4.25736	3.90064	3.85121	4.12391	4.47366	3.69354	4.08443	4.55305	3.90729	4.49394	3.84177	4.49817	3.86473
ID136	3.84202	4.29199	4.26509	4.03948	3.7958	3.96487	4.40303	3.59268	4.05759	4.3832	3.89964	4.50088	4.00668	4.3928	3.91572
ID137	4.13912	4.44269	4.33538	3.8268	4.13492	4.08454	4.41948	3.79368	4.28677	4.5947	4.08159	4.63069	3.73033	4.66265	3.86514
ID138	4.09252	4.29958	4.33915	3.93859	4.04122	4.17987	4.47718	3.70669	4.25772	4.5419	4.05382	4.61739	3.83631	4.58954	3.87282
ID139	3.93723	3.97523	4.21402	3.82309	3.60059	4.00689	4.34893	3.24841	3.99038	4.28434	3.84106	4.25748	3.86362	4.36573	3.90339
ID140	3.98562	4.22782	4.18376	3.73255	3.86991	3.97953	4.4148	3.63106	4.08341	4.43126	3.8956	4.37806	3.70733	4.41609	3.88221
ID141	4.07156	4.37357	4.18615	3.9109	3.95052	3.87707	4.45011	3.64262	4.15666	4.39058	3.92677	4.33138	3.94139	4.33539	3.93241
ID142	3.88224	4.24388	4.17002	3.96708	3.69171	3.916	4.34853	3.66668	3.91123	4.33761	3.73083	4.28581	3.89891	4.35532	3.85247
ID143	3.92518	4.30725	4.12466	3.83275	3.7693	3.83562	4.36348	3.60133	4.01988	4.30296	3.77212	4.30754	3.79586	4.27915	3.84434
ID144	3.79549	4.29879	4.20668	3.94693	3.70736	3.86959	4.37447	3.63207	3.96066	4.38126	3.86948	4.30025	3.73474	4.24013	3.82803
ID145	3.89914	4.24369	4.20748	4.02442	3.79923	4.01255	4.43286	3.48649	4.05452	4.38308	3.83501	4.33623	3.81378	4.4261	3.96973
ID146	3.92976	4.2621	4.21691	3.9247	3.90563	3.98269	4.4397	3.62215	4.0605	4.26286	3.8891	4.30571	4.03482	4.38967	3.88994
ID147	3.85576	4.12635	3.91004	3.90502	3.87526	4.06073	4.41898	3.48095	4.19059	4.50793	4.01672	4.47048	3.53601	4.5742	3.8604
ID148	3.98282	4.35236	4.24935	3.80936	3.95396	4.05591	4.45854	3.65167	4.17001	4.45061	3.95357	4.44358	3.77689	4.50502	3.8947
ID149	3.96706	4.39746	4.2803	3.9746	3.98102	4.07986	4.45587	3.63166	4.19518	4.49686	3.97789	4.46782	3.8252	4.52934	3.87455
ID150	3.99195	4.40316	4.08425	3.75567	3.75268	3.77885	4.30274	3.76243	4.13601	4.30232	3.77842	4.17976	3.67507	4.2248	3.91778
ID151	4.02797	4.34158	4.39397	4.07879	3.95008	4.07597	4.46127	3.63006	4.16108	4.45027	4.06878	4.51928	4.16432	4.44152	4.06788
ID152	4.12687	4.45332	4.16283	3.92022	3.96187	3.88156	4.53368	3.8514	4.08238	4.42314	3.86772	4.43093	3.86499	4.33033	3.98488
ID153	3.88565	4.16191	4.15472	3.66709	3.77032	3.80472	4.28542	3.57364	3.9139	4.29109	3.7648	4.41573	3.76218	4.37996	3.65271
ID154	3.85909	4.25547	4.25405	3.93851	3.77498	4.04377	4.41598	3.55315	4.12299	4.52561	4.01801	4.3956	3.85675	4.44972	3.93582
ID155	4.01034	4.29183	4.16241	3.97153	3.85478	3.91879	4.41819	3.68449	4.05081	4.36068	3.84746	4.30141	3.94049	4.37855	3.945
ID156	3.89076	4.18708	4.3234	3.77189	3.83609	4.03341	4.46524	3.47654	4.14891	4.44486	3.95718	4.51162	3.90888	4.56727	3.8533
ID157	3.98883	4.28929	4.26396	3.9508	3.84028	3.98936	4.44136	3.81549	4.01219	4.34747	3.93136	4.38235	4.02994	4.37107	3.95237
ID158	4.02637	4.32347	4.35012	3.93716	3.86338	4.04654	4.55586	3.48317	4.18972	4.56803	3.92635	4.57212	3.9781	4.53397	4.04931
ID159	3.94026	4.40095	4.16622	3.78008	3.92386	3.96884	4.54546	3.82558	4.06817	4.47427	3.8915	4.45868	3.4675	4.50505	3.87845
ID160	3.99933	4.35906	4.44637	4.07575	3.77331	3.97605	4.50568	3.63919	4.03935	4.4635	3.86825	4.48935	4.20659	4.50475	3.99891
ID161	3.89935	4.48902	4.1914	3.96424	3.94902	4.01671	4.49704	3.84124	4.19469	4.42372	3.96051	4.40646	3.80205	4.4317	3.94585
ID162	4.0523	4.1898	4.30483	3.97802	3.89173	4.03164	4.52358	3.53966	4.15264	4.42519	3.97696	4.40144	3.94968	4.48275	4.11403
ID163	3.97229	4.34889	4.26412	3.9687	3.76891	3.85064	4.41539	3.70641	4.01069	4.41405	3.86207	4.39157	3.94133	4.37368	3.93817
ID164	3.89679	4.18548	4.19837	3.9348	3.7719	4.03093	4.31828	3.48433	4.03624	4.39877	3.83178	4.35233	3.73715	4.40578	3.90468
ID165	3.81087	4.19966	4.29512	4.00186	3.90261	4.06151	4.4749	3.4949	4.05345	4.52651	3.96689	4.48559	3.96896	4.47757	3.92922
ID166	4.06817	4.50476	4.18495	3.96956	3.87528	3.92446	4.40899	3.88723	4.13647	4.42346	3.90116	4.40394	3.83948	4.33343	3.96863
ID167	4.05192	4.27113	4.20471	3.533	4.0764	4.00878	4.33548	3.7465	4.24223	4.39305	4.05753	4.50408	3.52667	4.5428	3.7122
ID168	4.11496	4.40043	4.34464	3.92557	4.0186	4.15572	4.57172	3.72106	4.2866	4.56299	4.08726	4.48266	4.01842	4.49806	4.04217
ID169	4.09616	4.37515	4.09834	3.52936	4.00038	3.90478	4.39074	3.85286	4.14296	4.38507	3.88666	4.41499	3.43881	4.43671	3.68244
ID170	4.06186	4.37089	4.38038	4.06068	3.92062	4.03017	4.53381	3.72738	4.06265	4.49821	3.92287	4.50733	4.05027	4.53172	3.99426
ID171	3.94852	4.20075	4.19648	3.83566	3.76974	3.985	4.44357	3.42819	4.06914	4.36187	3.86517	4.35223	3.81008	4.40675	3.9458
ID172	3.71673	3.95406	4.07921	3.62219	3.665	3.91745	4.3272	3.39982	3.8941	4.26792	3.7583	4.32769	3.38716	4.4528	3.7699
ID173	4.1619	4.33996	4.331	3.91788	3.91929	4.12986	4.55166	3.62397	4.17812	4.55286	4.04904	4.49488	3.90244	4.49705	4.14953
ID174	3.80072	4.16208	4.22845	3.91449	3.69021	3.91989	4.4195	3.4719	4.06457	4.36835	3.86072	4.35215	3.74978	4.4015	3.90833
ID175	3.90375	4.3261	4.11208	3.93931	3.68557	3.76552	4.40406	3.58672	3.90944	4.32806	3.69126	4.23531	3.89585	4.19872	3.91079
ID176	3.89697	4.11682	4.10706	3.74719	3.7009	4.01788	4.44216	3.65569	3.95294	4.3796	3.90351	4.25563	3.40253	4.36843	4.00929
ID177	3.92704	3.98856	4.17887	3.95706	3.79224	4.03879	4.32396	3.44352	4.09913	4.41602	3.95222	4.30659	3.70215	4.40029	3.97949
ID178	3.89621	4.15408	4.33114	3.90219	3.8547	4.08025	4.42137	3.45658	4.09823	4.46158	3.84182	4.46487	3.97869	4.54583	3.86201
ID179	3.97127	4.24526	4.33265	3.87546	3.85244	4.06098	4.47269	3.71859	4.09514	4.51275	3.92386	4.47971	3.9765	4.53902	3.9827
ID180	4.02743	4.31285	4.19687	4.02141	3.85087	3.86134	4.41388	3.47865	3.98875	4.36443	3.84801	4.36673	4.05847	4.3314	3.94616
ID181	3.72302	4.36945	3.9043	3.68409	3.50108	3.61356	4.32293	3.74051	3.91257	4.27811	3.60058	4.1475	3.43283	4.0752	3.84774
ID182	3.75278	3.98707	3.89986	NA	3.82187	3.57503	4.21375	3.36298	3.72766	3.98978	3.58614	4.34497	3.39959	4.32615	NA
ID183	3.87089	4.43439	3.99953	3.86908	3.65254	3.67574	4.28832	3.78654	3.97611	4.2875	3.71476	4.16343	3.71944	4.12078	3.8373
ID184	4.05813	4.15282	4.38751	4.02871	3.78802	4.18044	4.45781	3.41787	4.19199	4.52098	4.07071	4.49221	3.92435	4.51366	4.16856
ID185	3.89105	4.38982	4.27937	3.89389	3.92986	4.10156	4.507	3.80731	4.30218	4.4856	4.0619	4.47684	3.9201	4.51184	3.85514
ID186	3.95094	4.31728	4.21308	4.04936	3.84677	3.89122	4.41118	3.49803	3.99998	4.38617	3.79079	4.32753	4.17441	4.43487	3.97027
ID187	4.08982	4.42222	4.35895	3.94059	3.96112	4.03412	4.60387	3.72687	4.1732	4.68863	3.90052	4.62217	3.86622	4.62885	3.9609
ID188	3.95001	4.43358	4.13666	3.87527	3.86297	3.89511	4.39053	3.75799	4.09963	4.36044	3.78948	4.40365	3.81312	4.30785	3.83989
ID189	3.99502	4.3147	4.15656	3.86079	3.68191	3.8428	4.39929	3.69803	3.977	4.37897	3.81448	4.25824	3.73962	4.23669	3.94739
ID190	3.89503	4.22862	4.29448	3.96925	3.78962	3.90527	4.37925	3.56212	4.03595	4.40526	3.89568	4.41664	4.00932	4.44151	3.86238
ID191	3.98711	4.3427	4.25424	4.02113	3.86943	3.89203	4.35916	3.61159	3.98849	4.39421	3.82518	4.39069	4.08803	4.35542	3.93544
ID192	3.93481	4.09202	4.18282	3.84028	3.79245	4.02634	4.31586	3.44452	4.01075	4.32692	3.82718	4.30607	3.73189	4.38161	3.84054
ID193	3.87433	4.22404	4.3228	3.98033	3.79704	3.99431	4.48239	3.44052	4.14879	4.36578	3.97547	4.47704	4.02025	4.40257	3.92615
ID194	3.95492	4.30283	4.2667	3.94446	3.76923	3.87851	4.41099	3.70651	4.025	4.37103	3.88223	4.35934	3.99357	4.41049	3.90267
ID195	4.18397	4.30434	4.32649	3.83305	3.96031	4.07701	4.57764	3.61801	4.17722	4.55328	3.95402	4.61438	3.78078	4.61513	3.90536
ID196	3.93561	4.3011	4.19421	3.94264	3.82752	3.98281	4.41965	3.63535	4.0711	4.35151	3.90683	4.31312	3.95496	4.34483	3.91609
ID197	3.97429	4.27016	4.18739	3.8346	3.85089	3.89961	4.42977	3.55556	4.06626	4.3155	3.86634	4.3291	3.86798	4.37148	3.88433
ID198	3.83162	4.49152	4.12488	3.90721	3.76371	3.95034	4.37552	4.1271	4.06136	4.33119	3.87342	4.2819	3.68245	4.29806	3.88032
ID199	3.8967	4.36037	4.09713	3.51225	4.02319	3.66588	4.26685	3.86905	3.89596	4.39594	3.72591	4.52836	3.27127	4.53347	NA
ID200	3.9805	4.02912	4.24585	3.85721	3.75845	4.09904	4.43423	3.33486	4.04257	4.45848	3.8768	4.3953	3.74525	4.44161	4.00447
ID201	4.02218	4.38508	4.24791	3.92775	3.92503	4.0794	4.47297	3.71693	4.25688	4.52618	3.98593	4.47264	3.8395	4.42242	4.07629
ID202	3.99006	4.35666	4.17636	3.81647	3.76426	3.95514	4.4722	3.8324	4.02573	4.45096	3.7706	4.44431	3.70666	4.49879	3.867
ID203	3.94586	4.25535	4.23895	3.94411	3.85326	3.98004	4.25782	3.52365	4.18492	4.34795	4.01547	4.28439	3.94747	4.30988	3.96848
ID204	3.83345	4.24459	4.10566	3.63011	3.74859	3.85077	4.43632	3.59046	3.86558	4.37003	3.81751	4.3105	3.21387	4.37515	3.77232
ID205	4.01475	4.3035	4.27695	4.02194	3.8064	3.98347	4.45077	3.67054	3.95458	4.43407	3.86578	4.45792	3.92392	4.4083	3.96471
ID206	4.09623	4.36362	4.374	3.91291	4.048	4.18931	4.60545	3.7793	4.41045	4.62881	4.15515	4.59445	3.89046	4.62969	3.96195
ID207	4.03993	4.33667	4.28355	3.78971	4.00748	4.06243	4.51731	3.71443	4.30658	4.4609	4.09608	4.43375	3.83996	4.53863	3.88008
ID208	3.96243	4.14076	4.19973	3.9293	3.82917	3.9979	4.36253	3.39942	4.03041	4.42037	3.89533	4.37348	3.8211	4.34905	3.98116
ID209	3.8845	4.30063	4.24874	3.88552	3.74373	4.04571	4.41636	3.63639	4.07575	4.3731	3.86219	4.37597	3.78647	4.43038	3.91283
ID210	3.93885	4.10317	4.22664	3.86558	3.78417	4.05452	4.38542	3.508	4.03702	4.39471	3.93179	4.39984	3.73617	4.40603	3.96161
ID211	3.96321	4.22294	4.27656	3.91107	3.81532	3.95957	4.36156	3.40423	4.0222	4.33959	3.85895	4.37806	4.02211	4.39982	3.94131
ID212	3.79741	4.18855	4.18567	3.91159	3.6701	3.94065	4.40999	3.60413	4.03825	4.41946	3.82678	4.33041	3.75374	4.44139	3.84924
ID213	3.76341	4.26419	4.03048	3.88084	3.7059	3.85239	4.29087	3.61986	3.99729	4.27377	3.78086	4.21343	3.61562	4.24782	3.8053
ID214	3.85123	4.12345	4.19614	3.83258	3.77595	4.07856	4.32577	3.47232	4.08424	4.34001	3.82591	4.4184	3.70641	4.4444	3.7476
ID215	3.97541	4.21838	4.24015	4.02509	3.75543	3.94263	4.47255	3.5759	3.99286	4.41812	3.8282	4.4228	3.97985	4.45254	3.94816
ID216	3.96324	4.1383	4.21482	3.90365	3.75235	3.96258	4.4028	3.47794	3.96799	4.32075	3.79474	4.33015	3.97685	4.37993	3.92441
ID217	4.01014	4.19476	4.34686	3.89877	3.85986	3.98098	4.40578	3.48692	4.00743	4.38649	3.85515	4.41994	3.88849	4.4471	3.8881
ID218	4.13096	4.46246	4.39972	4.08685	4.0647	4.18789	4.61349	3.7489	4.24826	4.54236	4.08141	4.55812	4.154	4.55255	4.02373
ID219	3.91358	4.0276	4.16572	3.8044	3.7303	3.9294	4.34186	3.4614	3.92343	4.35533	3.80419	4.24411	3.6946	4.36048	3.95361
ID220	3.90238	4.21887	4.29551	4.00982	3.84789	3.95655	4.39682	3.46519	4.00837	4.40114	3.8711	4.41971	3.99651	4.41486	3.94295
ID221	3.85173	4.39606	4.04002	3.87345	3.69483	3.7275	4.34407	3.69909	3.98171	4.23121	3.76539	4.15345	3.8926	4.14606	3.9084
ID222	4.00594	4.33693	4.18151	3.82861	3.88118	4.08103	4.54021	3.7724	4.0702	4.48698	3.973	4.39044	3.46927	4.43116	3.94648
ID223	3.87961	4.26287	4.23028	4.06163	3.81112	3.93685	4.42626	3.52409	4.05671	4.37517	3.82197	4.30256	4.04468	4.38822	3.90397
ID224	3.96748	4.26618	4.27457	4.00963	3.82365	4.06063	4.45255	3.51011	4.10709	4.41433	3.88129	4.38661	4.06735	4.43942	4.00733
ID225	3.92341	4.36724	4.15794	3.88497	3.79573	4.00872	4.34756	3.5997	4.2559	4.39916	4.01392	4.27977	3.83285	4.34553	3.9988
ID226	3.83069	4.17944	4.01428	3.81747	3.67217	3.79846	4.28171	3.59051	3.90955	4.28686	3.72014	4.21576	3.57745	4.20788	3.82387
ID227	3.97611	4.1316	4.2461	3.9138	3.7969	4.11671	4.35527	3.46472	4.09434	4.38573	3.9316	4.39729	3.83593	4.38076	4.00283
ID228	3.93244	4.22728	4.24609	3.8465	3.75641	4.00924	4.41987	3.53098	4.06847	4.44322	3.91563	4.40651	3.84654	4.41062	3.94453
ID229	3.88358	4.17259	4.22219	3.88916	3.80035	4.01304	4.41892	3.54787	4.13112	4.39516	3.90961	4.35596	3.77902	4.41316	3.944
ID230	3.97101	4.04718	4.29746	3.77277	3.86627	4.13029	4.29049	3.25579	4.21513	4.38955	4.02656	4.40995	3.86918	4.47794	3.84805
ID231	3.89637	4.34512	4.24798	4.01339	3.9125	4.02338	4.45464	3.63924	4.09524	4.44058	4.01428	4.41111	3.98796	4.39184	3.8625
ID232	4.06088	4.34536	4.38634	3.90102	3.90121	4.13613	4.54372	3.77467	4.14037	4.56772	3.99872	4.58114	3.80307	4.5813	3.98894
ID233	4.03552	4.46751	4.30233	3.82642	4.11084	4.13916	4.61079	3.76695	4.33065	4.56996	4.07761	4.59214	3.79423	4.64353	3.88206
ID234	3.82417	4.20284	4.00102	3.73815	3.63901	3.87403	4.32893	3.69104	3.90501	4.35522	3.75272	4.23999	3.37695	4.38473	3.82494
ID235	4.03202	4.23279	4.26153	3.9706	3.81852	4.08066	4.37497	3.49094	4.0872	4.4362	3.92732	4.39804	3.80987	4.41917	4.08093
ID236	3.96966	4.23435	4.26559	3.99252	3.87008	3.94721	4.44284	3.52519	3.9354	4.49229	3.83998	4.44092	3.82572	4.50906	3.91854
ID237	3.85001	4.41751	3.95559	3.8365	3.69567	3.66503	4.30121	3.83654	3.90491	4.22117	3.62036	4.19129	3.66437	4.13105	3.78694
ID238	3.92908	4.53486	4.32252	3.95573	3.88793	4.17569	4.4935	4.24802	4.14224	4.56967	3.94463	4.50083	3.80667	4.52644	3.9791
ID239	3.85378	4.05507	4.05611	3.58061	3.64666	3.93311	4.31724	3.41006	4.07324	4.32094	3.86516	4.24738	3.30073	4.30839	3.84684
ID240	3.93685	4.18913	4.30405	3.91823	3.9319	4.12264	4.38644	3.45191	4.18097	4.45895	4.06053	4.46995	3.80879	4.52031	3.97304
ID241	3.92765	4.1958	4.31699	4.04047	3.8355	3.99488	4.40126	3.39517	4.12632	4.41854	3.92605	4.45884	4.0941	4.46402	3.92974
ID242	3.74424	4.40946	3.95116	3.82104	3.65656	3.73097	4.23816	3.66146	3.96381	4.20535	3.69776	4.14295	3.74927	4.17614	3.77931
ID243	4.01857	4.28773	4.20274	3.85535	3.8282	3.88391	4.39197	3.66959	4.10567	4.32386	3.92197	4.27939	3.89333	4.34018	3.93227
ID244	3.94637	4.37663	4.2614	4.07143	3.77834	3.96743	4.47733	3.74075	3.98674	4.40781	3.82625	4.40873	4.05984	4.35707	3.92061
ID245	3.86156	4.38561	4.00677	3.7566	3.69959	3.77434	4.28802	3.80581	4.0362	4.2698	3.78423	4.19848	3.56999	4.15744	3.83582
ID246	3.90385	4.23674	4.26193	3.91733	3.7195	3.95011	4.38949	3.71698	3.99879	4.3642	3.71669	4.36622	3.81798	4.43623	3.9502
ID247	3.96331	4.29299	4.25251	3.82854	3.95575	3.98026	4.40983	3.65352	4.12519	4.4221	3.93246	4.51001	3.85542	4.43953	3.76513
ID248	3.8218	4.42637	4.20859	3.95973	3.70841	3.90874	4.51049	3.71178	4.16164	4.46614	3.90837	4.4243	3.7485	4.42664	3.95722
ID249	3.91407	4.38012	4.12406	3.69005	3.71723	3.98586	4.46172	3.96416	3.98596	4.40771	3.89696	4.3011	3.36749	4.39888	3.8635
ID250	3.81863	4.1296	4.2732	3.9553	3.73239	4.08215	4.38893	3.44105	4.12424	4.39889	3.85781	4.40219	3.80719	4.52688	3.81657
ID251	3.97935	4.22666	4.1712	3.98906	3.74703	3.92511	4.43602	3.4456	4.0622	4.33079	3.8433	4.33581	3.87356	4.36777	3.96384
ID252	3.85012	4.41188	4.05953	3.77414	3.7205	3.75248	4.34338	3.81085	4.02391	4.2486	3.7465	4.18026	3.65422	4.23157	3.88954
ID253	3.8997	4.37687	4.18052	3.91645	3.82716	3.84121	4.41334	3.67089	3.99511	4.40034	3.78905	4.36535	3.73334	4.39607	3.85522
ID254	3.93756	4.36502	4.24483	3.92994	3.81413	3.96588	4.38893	3.67656	4.11151	4.32514	3.89182	4.3253	3.93505	4.33568	3.91246
ID255	3.89126	4.08283	4.26358	3.87879	3.69476	3.93273	4.35857	3.27493	4.03418	4.39656	3.88684	4.38362	3.8112	4.42171	3.90618
ID256	4.08289	4.19669	4.24995	3.92867	3.87431	3.99067	4.49734	3.88119	4.07196	4.45555	3.90814	4.38241	3.77483	4.4279	4.07651
ID257	4.06391	4.18687	4.26296	4.04134	3.80993	3.984	4.46704	3.41838	3.87185	4.45122	3.79722	4.40991	4.09678	4.39204	3.99444
ID258	3.84475	3.95861	4.1389	3.80129	3.65604	3.88341	4.34356	3.37596	3.96534	4.23827	3.77428	4.30049	3.6908	4.3591	3.8675
ID259	3.86543	4.17407	4.25296	3.88474	3.71389	4.01264	4.37592	3.53179	3.95932	4.29966	3.77944	4.34043	3.92492	4.39637	3.85841
ID260	3.93824	4.25849	4.13785	3.89865	3.60258	3.81486	4.39783	3.50227	3.96632	4.29213	3.7298	4.26037	3.87678	4.35178	3.88487
ID261	3.9189	4.40296	4.3357	3.98528	3.94104	4.15419	4.55988	3.74581	4.20891	4.53983	4.02052	4.60893	3.97002	4.52233	3.99086
ID262	3.92544	4.32511	4.28068	4.09799	3.67351	3.96279	4.44908	3.60456	4.02114	4.41063	3.8853	4.41796	4.07802	4.41196	4.00324
ID263	3.81795	4.40037	3.83959	3.6903	3.54031	3.58591	4.20829	3.86074	3.88287	4.16867	3.58932	4.05989	3.4561	4.00605	3.78091
ID264	3.84278	4.31691	4.12426	3.96169	3.85334	3.98976	4.45838	3.77373	4.11057	4.37209	3.88523	4.38917	3.68724	4.34365	3.83365
ID265	3.97533	4.23513	4.31519	4.02826	3.74238	3.9923	4.45278	3.44128	4.06737	4.41982	3.84664	4.44553	3.96823	4.47729	3.99702
ID266	3.98657	4.19612	4.32899	4.01259	3.7029	3.99661	4.41866	3.60274	4.10539	4.39574	3.89403	4.31783	4.08517	4.42969	3.99344
ID267	4.05497	4.60787	4.21424	3.85724	3.97728	4.05649	4.54069	4.00059	4.36175	4.50041	4.13075	4.51507	3.83848	4.41544	4.04295
ID268	4.00665	4.21441	4.3402	4.10087	3.86447	4.11331	4.46168	3.35478	4.11358	4.44582	3.9977	4.47656	4.15471	4.46135	4.05678
ID269	3.99474	4.42227	4.28386	3.80668	3.91657	4.02358	4.54761	3.78453	4.33443	4.51567	4.03498	4.53277	3.8214	4.54467	3.8925
ID270	3.8612	4.1688	4.04215	3.86383	3.72361	3.92647	4.33523	3.45952	4.0566	4.3782	3.9168	4.267	3.70641	4.3454	3.93215
ID271	3.93016	4.38658	4.27641	3.99124	3.73924	3.93868	4.4346	3.73937	4.14965	4.42832	3.94105	4.34625	4.00683	4.41553	3.90807
ID272	3.9479	4.31402	4.25327	3.95628	3.83202	4.0443	4.50367	3.6237	4.14854	4.43973	3.90708	4.42528	3.85466	4.51401	4.03632
ID273	4.19697	4.44329	4.24298	3.69147	4.0864	4.1925	4.50145	3.94955	4.22491	4.57467	4.07593	4.61479	3.43387	4.67261	3.8683
ID274	3.92016	4.22309	4.29128	3.83585	3.86589	4.18644	4.50642	3.42107	4.22834	4.48872	4.06918	4.49172	3.75992	4.56303	3.96124
ID275	3.80322	4.05014	4.18403	3.74806	3.75444	4.05119	4.3551	3.44316	4.01374	4.36671	3.91184	4.3008	3.64226	4.4249	3.8719
ID276	4.28114	4.46156	4.54322	4.04862	4.25268	4.27547	4.6547	3.82879	4.29369	4.61598	4.13075	4.73945	4.29685	4.74678	4.02548
ID277	3.93133	4.23735	4.1905	3.95305	3.74731	3.93321	4.42618	3.63885	4.05525	4.36635	3.85448	4.31824	3.73455	4.41242	3.94951
ID278	3.95657	4.3301	4.32907	4.04581	3.83429	4.07957	4.56154	3.6513	3.9993	4.58712	3.84552	4.55448	3.85227	4.48553	3.98095
ID279	3.93799	4.29027	4.34115	3.85676	3.89578	4.18895	4.51545	3.53384	4.28544	4.48176	4.08536	4.55623	3.89941	4.51653	4.02583
ID280	4.01637	4.34877	4.24307	4.02278	3.81144	4.05919	4.53155	3.81438	4.02648	4.48547	3.87929	4.46471	3.75379	4.488	4.0093
ID281	3.97906	4.3358	4.028	3.53538	3.87119	3.73012	4.32854	3.77132	4.00121	4.30115	3.79475	4.31046	3.42021	4.25601	3.67576
ID282	3.89333	4.33684	4.13967	3.82212	3.79667	3.96214	4.33025	3.61041	4.12766	4.34051	3.97127	4.2814	3.66569	4.29776	3.92719
ID283	4.01852	4.29744	4.31055	4.06926	3.71664	3.93558	4.48594	3.48473	4.04376	4.41329	3.92109	4.38106	4.10398	4.44837	3.98546
ID284	3.94895	4.34522	4.06931	3.78226	3.70144	3.77045	4.33699	3.76211	4.06349	4.29409	3.79542	4.20615	3.61386	4.24834	3.90721
ID285	3.99833	4.26608	4.30215	3.89617	3.87305	4.06311	4.4602	3.61688	4.01717	4.48441	3.83889	4.4823	3.75834	4.49248	3.89267
ID286	3.93196	4.25872	4.26349	3.99662	3.82369	3.93289	4.42855	3.46777	4.01484	4.41138	3.8169	4.41012	4.09542	4.44532	3.90374
ID287	3.75965	3.88082	4.18422	3.78574	3.73506	3.98728	4.37546	3.30318	3.94053	4.35713	3.77247	4.38646	3.63987	4.48884	3.8009
ID288	3.90042	4.1284	4.15966	3.87604	3.73276	3.7926	4.3614	3.60167	3.96856	4.30529	3.7781	4.26404	3.77422	4.32288	3.9566
ID289	3.83259	4.33383	4.20221	3.93445	3.78734	3.98852	4.43148	3.76065	4.10043	4.39941	3.87149	4.36014	3.73995	4.43227	3.91056
ID290	3.87923	4.58288	4.17696	3.85853	3.98191	4.0842	4.46216	4.0253	4.20735	4.44851	4.04428	4.41215	3.62943	4.44259	3.89374
ID291	4.02978	4.13811	4.20859	3.94024	3.86166	4.09255	4.4489	3.50997	4.03053	4.45367	3.95266	4.36565	3.72034	4.41833	4.08189
ID292	4.01026	4.13949	4.28039	3.91055	3.9037	4.03005	4.44617	3.42327	4.11375	4.35248	3.94117	4.40402	4.00515	4.48114	3.94506
ID293	3.87529	4.20281	4.32682	3.91015	3.91364	4.09453	4.3928	3.59089	4.19911	4.46514	4.07263	4.45131	3.89155	4.51268	3.85327
ID294	3.84362	4.35512	4.12533	3.87716	3.803	3.89937	4.38674	3.72283	4.13309	4.38084	3.93795	4.30968	3.68561	4.3181	3.83733
ID295	3.82382	4.14494	4.21202	3.82423	3.75961	4.01356	4.30347	3.58358	4.10687	4.34909	3.96982	4.3611	3.74715	4.35358	3.83746
ID296	3.86196	4.1741	4.09672	3.92996	3.74225	3.95587	4.39063	3.5061	3.9555	4.29496	3.7437	4.25195	3.69758	4.3346	3.95361
ID297	4.06098	3.97839	4.29344	3.79673	3.91531	4.17675	4.4968	3.43787	4.09039	4.41445	3.96391	4.44184	3.77748	4.55581	3.92927
ID298	4.01738	4.55039	4.26648	4.02096	3.88635	3.95418	4.43261	3.97292	4.18921	4.45332	3.98688	4.4171	3.98168	4.4239	3.96134
ID299	3.799	4.10491	4.18703	3.81204	3.76651	3.92771	4.34489	3.48515	4.02458	4.41759	3.85731	4.32274	3.75067	4.38439	3.88104
ID300	3.89233	4.1997	4.23556	3.95951	3.81165	3.97522	4.47358	3.57205	4.03667	4.35549	3.81723	4.41386	3.82083	4.45565	3.95255
ID301	3.87552	4.16595	4.14476	3.80842	3.67126	4.01746	4.45989	3.39187	4.01501	4.41627	3.79775	4.34746	3.47571	4.4614	3.97483
ID302	3.81662	4.27154	4.10736	3.81569	3.70943	3.85216	4.37526	3.7602	3.97277	4.24448	3.70505	4.26098	3.64222	4.31393	3.82605
ID303	4.02805	4.17362	4.22944	3.75624	3.90075	4.11416	4.3795	3.58719	4.19186	4.35208	3.99097	4.38128	3.67403	4.466	4.00948
ID304	3.9532	4.28713	4.33765	4.20196	3.88622	4.03196	4.50125	3.61546	4.00208	4.43732	3.86863	4.46873	4.05801	4.43829	3.98329
ID305	3.99898	4.4922	4.24811	3.72551	4.05296	3.99334	4.45585	3.85685	4.3087	4.50515	4.126	4.54002	3.71952	4.5623	3.76642
ID306	4.06754	4.19583	4.2383	3.91851	3.8147	4.10977	4.4252	3.61603	4.0652	4.43075	3.87537	4.3744	3.77986	4.38786	3.98105
ID307	3.96465	4.27012	4.27232	3.92304	3.88706	3.99882	4.35522	3.54639	4.0914	4.3052	3.9618	4.35145	4.0621	4.39913	3.97631
ID308	3.91769	4.04334	4.25184	3.96703	3.73902	3.98941	4.3937	3.35355	3.9728	4.32641	3.80251	4.37709	4.01757	4.37498	3.90017
ID309	3.91046	4.38137	4.14313	3.95435	3.76595	3.79473	4.38128	3.72416	3.94806	4.29466	3.76683	4.2988	3.95587	4.23796	3.86588
ID310	3.72873	4.10873	4.18823	3.92254	3.72849	3.93091	4.33768	3.42791	3.95975	4.30341	3.78962	4.34667	3.80765	4.36693	3.80717
ID311	4.05985	4.30529	4.27902	3.98663	3.85268	4.08441	4.42745	3.56734	4.12828	4.37604	4.00423	4.4115	4.11929	4.40601	4.02443
ID312	4.00048	4.24269	4.30625	3.8763	3.80444	4.10189	4.51409	3.68307	4.0916	4.4952	3.96624	4.53589	3.98089	4.48968	4.05767
ID313	3.97341	4.02891	4.17801	3.81908	3.71232	3.95285	4.21398	3.43726	4.04612	4.31686	3.91648	4.22114	3.75867	4.26815	3.96741
ID314	4.11673	4.41124	4.41351	3.98848	4.04117	4.1712	4.60657	3.7493	4.21842	4.55968	4.07765	4.64315	4.10912	4.60223	3.90406
ID315	4.00444	4.17994	4.30681	3.89968	3.88299	4.01873	4.46012	3.43625	4.17861	4.42837	3.99827	4.45288	3.89122	4.4715	3.94762
ID316	3.99338	4.49719	4.18486	3.73478	3.96439	3.84732	4.44812	3.82806	4.24712	4.44038	3.85011	4.45496	3.72308	4.49299	3.79357
ID317	3.86483	4.05642	4.21353	3.7818	3.70248	3.92805	4.27847	3.39255	4.07291	4.34773	3.90959	4.40056	3.73301	4.42963	3.79111
ID318	4.05071	4.39391	4.43019	4.1018	3.85626	4.0015	4.53547	3.64792	3.99283	4.50503	3.81553	4.48385	4.22196	4.45333	4.02538
ID319	3.74267	3.96539	4.09866	3.70382	3.8063	3.99168	4.27799	3.40845	3.95009	4.30408	3.87602	4.23733	3.49937	4.37537	3.75995
ID320	4.00764	4.46667	4.27194	3.96555	3.75827	3.97582	4.46709	3.96302	4.04408	4.43645	3.82572	4.39756	3.9908	4.44117	3.97525
ID321	3.99936	4.3016	4.28056	4.03914	3.8863	4.01004	4.44281	3.66644	3.9987	4.43661	3.83446	4.4092	4.09234	4.41928	3.93188
ID322	3.87401	4.11409	4.04811	3.72871	3.76168	3.96475	4.39724	3.56068	3.94215	4.32218	3.83769	4.20046	3.34762	4.38406	3.97531
ID323	3.98088	4.34161	4.45298	4.04154	3.743	3.97064	4.49233	3.63712	4.04539	4.45762	3.85375	4.47027	4.18475	4.48093	3.97455
ID324	3.88587	4.22593	4.27072	3.91695	3.65295	3.96236	4.44788	3.35671	3.99056	4.33896	3.81226	4.43242	3.93994	4.42893	3.8665
ID325	3.93774	4.32711	4.14152	3.94703	3.72154	3.74017	4.39799	3.79723	3.82229	4.37501	3.69161	4.31713	3.89327	4.24201	3.89992
ID326	4.10714	4.5657	4.13898	3.96392	4.02654	3.84315	4.52548	3.93889	4.20379	4.40333	3.97393	4.37456	3.86033	4.30484	3.9821
ID327	3.86191	4.31163	4.15728	3.91341	3.72897	3.95303	4.37059	3.69099	4.0976	4.35104	3.90174	4.30918	3.81513	4.33069	3.83567
ID328	4.00249	4.22316	4.33006	3.98237	3.83392	4.16038	4.47203	3.50888	4.08669	4.47154	3.97793	4.48149	3.90011	4.47413	4.03894
ID329	3.98334	4.32815	4.13634	3.84371	3.87055	3.94118	4.41176	3.73605	4.10525	4.40092	3.89843	4.35799	3.6016	4.3287	3.94658
ID330	3.91001	4.21083	4.21665	3.86494	3.83431	4.03678	4.46149	3.49745	4.04871	4.49958	3.81582	4.42541	3.79839	4.43981	3.94601
ID331	3.99958	4.12374	4.19871	3.44996	3.90013	4.10098	4.39099	3.52921	4.06828	4.30294	3.89866	4.39868	3.68483	4.49758	3.7185
ID332	3.80966	4.27958	3.98866	3.66955	3.71636	3.82526	4.33696	3.62197	3.97447	4.30462	3.80114	4.21763	3.35833	4.27962	3.73892
ID333	3.84632	4.13202	4.13532	3.96167	3.71939	3.88481	4.34294	3.51409	3.89615	4.33076	3.75545	4.33949	3.78966	4.30891	3.83576
ID334	3.80953	4.46672	3.97517	3.89139	3.65277	3.60644	4.36241	3.80481	3.79623	4.31741	3.65735	4.26585	3.72271	4.12312	3.79623
ID335	3.88605	4.00869	4.20772	3.85477	3.74864	4.00935	4.33712	3.45858	3.90536	4.3926	3.78029	4.3007	3.78359	4.41419	3.90911
ID336	3.83765	4.29913	4.14102	3.76154	3.80396	3.96429	4.40754	3.83583	3.96677	4.41662	3.83197	4.33097	3.50045	4.42834	3.77111
ID337	3.94886	4.30153	4.21993	4.00892	3.77562	3.86919	4.4211	3.6457	3.98208	4.32851	3.77791	4.31943	4.02954	4.35637	3.94519
ID338	4.0414	4.47125	4.15581	3.84331	3.83975	3.94913	4.49013	3.81918	4.25996	4.4711	3.98089	4.35844	3.61878	4.37312	3.93963
ID339	3.91944	4.27105	4.06682	3.74657	3.68712	3.71936	4.34665	3.76481	3.92706	4.26929	3.69726	4.19492	3.70022	4.18259	3.84839
ID340	3.83893	4.15653	4.1363	3.86138	3.7356	3.92852	4.39446	3.59073	3.95232	4.2957	3.72943	4.30076	3.86605	4.32199	3.81204
ID341	4.05735	4.38056	4.27774	3.93067	3.85257	4.02401	4.49299	3.81967	4.10443	4.46742	3.9254	4.4067	3.84248	4.46085	4.01433
ID342	3.89167	4.05081	4.16734	3.86341	3.78084	3.96326	4.28326	3.37015	4.08888	4.37254	3.90906	4.26789	3.7652	4.30896	3.92825
ID343	4.06594	4.36865	4.35568	3.93741	3.81586	4.09026	4.51733	3.7862	4.19921	4.54684	4.044	4.49956	3.95593	4.52768	4.05171
ID344	3.9069	4.32438	4.31989	4.05315	3.83869	4.08436	4.3902	3.78714	4.10069	4.4332	3.94714	4.53026	3.97094	4.44711	3.94403
ID345	3.8253	4.20077	4.12096	3.92282	3.72631	3.82131	4.33233	3.41069	3.90694	4.30057	3.74557	4.31714	3.85285	4.30135	3.84371
ID346	3.87429	4.11804	4.27024	3.86627	3.80511	4.01487	4.43711	3.52195	4.17637	4.35502	3.95168	4.38888	3.79408	4.50187	3.93277
ID347	3.87805	4.08507	4.16745	3.93058	3.77085	4.04531	4.40642	3.39352	4.06892	4.31019	3.8288	4.29224	3.71491	4.42058	3.98361
ID348	3.9966	4.27786	4.2455	3.92878	3.84036	4.01108	4.5219	3.68316	4.0572	4.44282	3.8515	4.38813	3.74482	4.49544	3.97095
ID349	3.87387	3.95114	4.20334	3.82269	3.72665	4.03302	4.32523	3.2888	3.99334	4.29435	3.78004	4.33413	3.7053	4.38816	3.87833
ID350	3.87211	4.3054	4.16947	3.83047	3.87756	4.02389	4.41988	3.7341	4.09566	4.34577	3.867	4.348	3.75282	4.4124	3.86874
ID351	3.85686	4.13362	4.04188	3.82093	3.69786	3.76272	4.27564	3.44988	3.88377	4.22362	3.70742	4.17581	3.75703	4.16098	3.8108
ID352	3.82531	4.33516	4.08833	3.93258	3.70585	3.89739	4.37311	3.57522	4.1169	4.3831	3.83203	4.24488	3.66103	4.33573	3.91471
ID353	3.88997	4.19433	4.24204	3.95859	3.82198	4.02637	4.38948	3.55147	4.05992	4.35227	3.98947	4.39438	4.01081	4.36879	3.92628
ID354	3.86734	4.13665	4.30656	3.97975	3.75433	3.97635	4.3772	3.34067	3.98478	4.38216	3.88192	4.35796	4.01761	4.39974	3.87855
ID355	3.96598	4.14048	4.23819	3.68615	3.94246	3.9715	4.36428	3.43485	4.14339	4.25602	3.98658	4.45909	3.89445	4.50373	3.7073
ID356	3.90896	4.33588	4.25226	3.93572	3.79544	4.04845	4.47494	3.88647	4.14206	4.45547	3.93032	4.43346	3.80957	4.31958	3.98346
ID357	3.92145	4.27291	4.30409	3.9988	3.92256	3.99854	4.43026	3.45775	4.12558	4.35674	3.96028	4.39528	4.07667	4.40996	3.91863
ID358	3.65902	4.28989	4.11169	3.89636	3.69945	3.87089	4.33724	3.7774	3.91238	4.25262	3.74575	4.26055	3.69101	4.3131	3.75032
ID359	4.04347	4.39591	4.19423	NA	4.04411	3.85876	4.33365	3.89221	4.0788	4.40326	3.83666	4.49139	3.26088	4.56502	NA
ID360	3.71523	4.36869	3.96333	3.62777	3.77307	3.67778	4.30546	3.63936	3.96357	4.26181	3.67303	4.18443	3.22089	4.29448	3.74617
ID361	3.83275	4.16416	4.24805	3.89812	3.74811	3.94499	4.36658	3.51557	4.08162	4.32788	3.84764	4.38938	3.78327	4.41807	3.82313
ID362	3.79549	4.09555	4.24909	3.94034	3.63859	3.95424	4.41091	3.24212	4.07353	4.32115	3.93573	4.38275	3.98352	4.31485	3.86726
ID363	3.97118	4.21569	4.32606	3.99891	3.91229	4.16419	4.51703	3.34605	4.182	4.54084	3.93838	4.56598	3.96793	4.48324	4.04022
ID364	3.91727	4.13535	4.33638	3.98575	3.85936	3.97589	4.31389	3.47564	4.02915	4.28708	3.93357	4.37492	4.05664	4.41997	3.99085
ID365	3.88849	4.2987	4.1582	3.86619	3.78922	4.00586	4.36371	3.64554	4.12358	4.40184	3.97592	4.34892	3.79624	4.36743	3.96017
ID366	3.93897	4.43133	4.24645	3.55999	4.1818	3.90251	4.37883	3.90658	4.17587	4.46906	3.8766	4.62871	3.36101	4.66468	3.64494
ID367	3.86782	4.01142	4.24686	3.80863	3.7928	4.03252	4.38228	3.38239	4.11883	4.45644	3.91072	4.45173	3.75311	4.49536	3.86235
ID368	3.99036	4.25388	4.27275	3.96951	3.83808	4.05985	4.39317	3.56179	4.0732	4.37808	3.99207	4.33993	4.01648	4.40152	3.96228
ID369	4.04101	4.31685	4.32245	3.9319	3.75226	4.14067	4.48233	3.72573	4.15321	4.49725	3.9783	4.47332	3.81231	4.4968	4.02919
ID370	3.93694	4.09094	4.25077	3.76943	3.78157	4.02555	4.37927	3.40959	4.01113	4.30028	3.84366	4.37572	3.95047	4.37741	3.84149
ID371	3.9971	4.36548	4.37589	3.80448	3.9627	4.15995	4.53146	3.77698	4.2254	4.54679	3.96146	4.52631	3.64978	4.59265	3.7943
ID372	3.7182	4.27945	3.89649	3.68793	3.58232	3.78382	4.22216	3.6329	3.92882	4.27141	3.70667	4.15013	3.41415	4.14099	3.77526
ID373	3.96893	4.19472	4.28818	4.11177	3.7559	3.99118	4.48204	3.36402	4.02384	4.46736	3.89565	4.41463	4.09613	4.50776	4.06039
ID374	3.95957	4.45453	4.12679	3.81037	3.83974	3.90819	4.43809	3.81682	4.18259	4.41158	3.9461	4.3629	3.69008	4.36031	3.97696
ID375	3.90804	4.36257	4.24914	3.95926	3.83239	3.91997	4.47612	3.77934	3.97115	4.43565	3.80179	4.48928	3.783	4.34704	3.89924
ID376	3.80332	4.37584	4.1757	3.94853	3.81485	3.97287	4.43639	3.75775	4.16785	4.43112	3.91648	4.38651	3.71896	4.45135	3.76114
ID377	3.99658	4.117	4.28888	3.9101	3.70445	4.09564	4.43802	3.49889	4.04616	4.4013	3.90604	4.36808	3.87557	4.42622	3.99499
ID378	4.09928	4.26457	4.37718	3.97083	4.03738	4.14922	4.51235	3.52991	4.2326	4.48698	4.01502	4.52731	4.02532	4.59825	3.96283
ID379	3.96156	3.97011	4.26108	3.81964	3.74677	4.07875	4.36572	3.45181	4.04829	4.41967	4.02348	4.39689	3.753	4.44164	3.96884
ID380	3.99855	4.26367	4.25272	3.97273	3.89583	4.07847	4.45784	3.63735	4.12875	4.39862	3.9055	4.38866	3.97208	4.4268	3.93634
ID381	4.01747	4.25803	4.28184	3.9527	3.86	4.04356	4.44519	3.56595	4.09871	4.44769	3.90691	4.4283	3.85123	4.43163	4.01351
ID382	3.89771	4.08081	4.16602	3.77238	3.83584	3.99742	4.46507	3.47639	3.99278	4.38627	3.89195	4.35939	3.56265	4.43551	3.95089
ID383	3.83746	4.11714	4.21933	3.92341	3.70436	4.02284	4.34815	3.47614	4.02521	4.32896	3.80751	4.31941	3.7663	4.39121	3.89755
ID384	4.12638	4.48614	4.28558	3.99752	4.03784	4.0622	4.51645	3.91249	4.2436	4.49103	3.98858	4.49242	4.01307	4.47708	3.90815
ID385	3.9681	4.32701	4.3446	3.9912	3.87156	4.15693	4.56149	3.60734	4.1843	4.54142	3.9593	4.53665	3.97424	4.53547	4.03891
ID386	3.80532	3.99495	4.19351	3.82937	3.73182	4.0153	4.43377	3.40462	4.01828	4.4572	3.89043	4.40937	3.53888	4.46329	3.87891
ID387	4.04592	4.45936	4.34159	3.92192	3.84387	4.13809	4.55799	3.83212	4.25641	4.57376	4.00595	4.54602	3.95842	4.47787	4.12294
ID388	4.07236	4.32782	4.3789	4.01292	3.9471	4.13478	4.44939	3.67814	4.2043	4.48468	4.0278	4.46276	4.06571	4.53565	3.94674
ID389	3.98525	4.54675	4.11053	3.78634	3.80651	3.73976	4.43323	3.95225	4.19523	4.38317	3.88105	4.31303	3.61184	4.31392	3.91513
ID390	3.93098	4.13428	4.35042	3.90259	3.87987	4.17531	4.43589	3.57507	4.21987	4.47592	4.03127	4.49896	3.95742	4.5762	3.9829
ID391	4.06081	4.32526	4.21105	4.03341	3.82436	3.9461	4.44546	3.77454	3.92659	4.41358	3.79636	4.37028	4.00112	4.36365	3.97457
ID392	3.94836	4.17007	4.26868	3.94138	3.78784	4.08904	4.44077	3.58996	4.05948	4.48358	3.88808	4.41517	3.91034	4.41672	4.03042
ID393	4.01747	4.32358	4.28397	4.04613	3.82842	4.08399	4.46111	3.65816	4.00289	4.45493	3.93462	4.44519	4.04396	4.4167	3.98029
ID394	3.99258	4.08912	4.36514	4.01478	3.87161	4.19952	4.4453	3.53101	4.19409	4.50221	4.08937	4.43644	3.96918	4.5014	4.06669
ID395	3.7567	4.08814	4.102	3.91104	3.69367	3.90155	4.30331	3.40759	3.89845	4.28606	3.71444	4.27239	3.68947	4.3023	3.83379
ID396	3.94654	4.11274	4.3228	3.98807	3.87922	4.16583	4.39132	3.45159	4.17741	4.4568	4.0395	4.414	3.9236	4.52698	3.93084
ID397	4.13498	4.55081	4.42413	3.97591	4.08667	4.22935	4.61232	3.85749	4.4431	4.6536	4.16865	4.65813	4.026	4.66178	4.0088
ID398	3.80237	4.33494	4.03899	3.72277	3.67359	3.75269	4.35682	3.6537	4.03872	4.32917	3.74838	4.24387	3.64461	4.25662	3.88684
ID399	3.85409	4.11588	4.27562	NA	3.88453	3.93343	4.30385	3.66908	3.79889	4.20448	3.67482	4.43893	3.6586	4.44483	3.54502
ID400	3.93824	4.35033	4.25106	3.94782	3.93499	4.08049	4.48221	3.60255	4.15172	4.40141	3.88135	4.43465	3.9633	4.51811	4.00557
ID401	3.82085	4.12376	4.07562	3.94881	3.68488	3.86298	4.38342	3.43841	3.91469	4.27466	3.73687	4.32686	3.83677	4.25938	3.84474
ID402	3.97989	4.27753	4.25914	4.01181	3.83351	4.0137	4.42105	3.50389	3.97643	4.39201	3.86956	4.40838	4.03502	4.40695	3.96203
ID403	3.87445	4.32921	4.0637	3.72067	3.75467	3.96066	4.43844	3.81897	4.02864	4.37585	3.87087	4.28312	3.32949	4.39568	3.85527
ID404	3.79648	4.35122	4.0416	3.7821	3.67738	3.81328	4.3246	3.67858	4.08431	4.18025	3.8099	4.20097	3.74546	4.146	3.83596
ID405	3.78203	4.23432	4.12476	3.9231	3.74726	3.9517	4.32509	3.64568	3.94965	4.33552	3.79891	4.25534	3.71729	4.34831	3.81793
ID406	3.84597	4.11238	4.0589	3.65842	3.78538	3.96448	4.37291	3.45422	3.96837	4.33305	3.87714	4.32819	3.34247	4.43504	3.83765
ID407	3.89176	4.43634	4.1352	3.83186	3.77513	3.92489	4.42261	3.74923	4.20316	4.39713	3.98515	4.32782	3.71775	4.3299	3.94829
ID408	3.86562	4.04672	4.2542	3.7438	3.72044	4.11186	4.39653	3.39911	4.07017	4.33087	3.8726	4.45791	3.7025	4.4416	3.88583
ID409	3.85556	4.24629	4.18825	3.96289	3.7927	3.94297	4.38068	3.40102	4.03699	4.278	3.93145	4.29424	4.05638	4.36012	3.89211
ID410	4.02345	4.3534	4.40398	4.05296	4.00222	4.14145	4.58677	3.47978	4.21239	4.52637	4.03206	4.58481	4.13369	4.62486	3.89711
ID411	3.7178	4.35037	4.04222	3.68029	3.71135	3.88109	4.42304	3.81097	3.90546	4.34908	3.83157	4.27958	3.34799	4.3647	3.7611
ID412	3.82124	4.3286	3.96919	3.79954	3.62744	3.69305	4.25392	3.69091	3.96113	4.24135	3.70903	4.13523	3.64638	4.11234	3.77942
ID413	4.17105	4.43845	4.46085	3.96863	4.13217	4.23449	4.56651	3.8122	4.30783	4.60854	4.13195	4.77384	4.02982	4.69877	3.90559
ID414	4.04195	4.0105	4.31104	3.85274	3.84315	4.17679	4.42358	3.40815	4.15792	4.44925	4.00532	4.42778	3.75857	4.45007	4.01886
ID415	4.21556	4.45675	4.44611	4.01596	4.14147	4.21103	4.6175	3.75224	4.32352	4.61457	4.11513	4.66161	4.10967	4.62538	3.95725
ID416	3.94824	3.98172	4.19558	3.70094	3.73088	4.07313	4.39264	3.46627	4.01422	4.34541	3.87519	4.30152	3.63316	4.45165	3.92483
ID417	3.7647	4.45811	4.01478	3.88698	3.67094	3.74715	4.30775	3.60287	4.02979	4.24403	3.78123	4.15949	3.82626	4.10726	3.82644
ID418	3.98765	4.27501	4.31434	3.80975	4.04971	4.13224	4.49836	3.45764	4.27356	4.52552	4.09562	4.54664	3.81648	4.61959	3.83342
ID419	3.92833	4.09511	4.26735	3.94903	3.83027	4.02907	4.37298	3.33878	4.07937	4.32173	3.94389	4.36796	3.99486	4.41903	3.98236
ID420	3.9639	4.19937	4.27135	4.01206	3.73466	4.06957	4.45711	3.40918	4.08608	4.40647	3.92572	4.30133	3.97669	4.40662	4.01487
ID421	3.86683	4.27136	4.09967	3.76868	3.64694	3.95407	4.33745	3.62244	4.06904	4.37203	3.87202	4.28333	3.65121	4.24229	3.86263
ID422	3.94565	4.25259	4.2356	3.93307	3.78902	4.00059	4.45525	3.57591	4.01412	4.32409	3.83353	4.38433	3.93776	4.35785	3.92604
ID423	3.89405	4.34505	4.17085	3.95712	3.667	3.86829	4.40046	3.78266	3.93674	4.34693	3.77441	4.31709	3.88002	4.24295	3.9137
ID424	3.84009	4.26956	4.03307	3.79772	3.70121	3.85972	4.25339	3.6888	4.00243	4.32618	3.83495	4.20604	3.55108	4.2415	3.83951
ID425	4.01789	4.44278	4.24101	3.94572	3.91355	4.00015	4.44896	3.72228	4.18221	4.41949	4.00751	4.4341	3.90605	4.40485	3.90678
ID426	4.04541	4.32102	4.31341	3.95517	3.98347	4.10489	4.50967	3.64285	4.17826	4.50243	4.05017	4.52996	3.89511	4.57031	3.8946
ID427	4.05966	4.43874	4.19815	3.89968	3.95243	3.82447	4.43525	3.84719	4.1622	4.49079	3.92012	4.44656	3.80514	4.40929	3.84481
ID428	3.9056	4.33685	4.16113	3.89557	3.71864	3.83737	4.36655	3.73652	4.00646	4.32817	3.74555	4.28802	3.87537	4.31179	3.87981
ID429	4.03959	4.35226	4.31321	4.11315	3.87421	4.05425	4.5361	3.65448	4.02833	4.52904	3.82217	4.50387	4.09661	4.50736	3.97454
ID430	3.88427	4.50334	4.07807	3.82751	3.69328	3.78871	4.36551	3.96251	4.14893	4.35961	3.82935	4.25683	3.79768	4.22404	3.90886
ID431	3.88354	4.16521	4.0718	3.85389	3.78362	3.97934	4.33675	3.43047	4.09833	4.39114	3.95869	4.26873	3.69651	4.36817	3.93073
ID432	3.9919	4.28323	4.26281	3.91013	3.82803	3.91324	4.45762	3.56215	4.07221	4.46243	3.90376	4.3708	3.80861	4.42702	3.96148
ID433	3.95702	4.31783	4.32035	3.91282	3.90892	4.10572	4.50921	3.71917	4.15951	4.51998	3.98064	4.48052	3.93331	4.57229	3.95914
ID434	3.76184	4.34442	3.86846	3.52511	3.51141	3.82461	4.20836	3.91977	3.86806	4.12359	3.65303	4.12654	3.25115	4.22167	3.67875
ID435	4.03579	4.30698	4.30232	4.14861	3.9787	4.05284	4.49254	3.48888	4.02254	4.47573	3.9584	4.44559	4.13633	4.4557	4.05089
ID436	3.96668	4.16437	4.25058	3.89697	3.76184	4.03234	4.41351	3.33687	4.04802	4.32166	3.85498	4.37803	4.02398	4.36639	3.93844
ID437	3.88623	4.19087	4.22915	3.92017	3.75971	3.87188	4.40808	3.50041	3.98797	4.34706	3.80758	4.36817	3.93994	4.35157	3.89462
ID438	3.9292	4.22795	4.24535	3.93084	3.83563	4.05139	4.44556	3.58661	4.07893	4.44457	3.91374	4.37449	3.90464	4.49585	3.97793
ID439	4.0061	4.29367	4.35854	3.97092	3.79536	4.14953	4.43959	3.65843	4.25637	4.46154	3.99681	4.49242	3.86208	4.54019	4.02825
ID440	4.13415	4.58845	4.31728	3.67467	NA	3.97365	4.49472	3.92893	4.21301	4.54782	3.95293	4.66615	3.81362	4.63242	3.686
ID441	3.94412	4.36632	4.23907	4.09941	3.79667	4.00847	4.47557	3.679	4.05733	4.40228	3.89405	4.31948	4.04457	4.44101	4.00637
ID442	3.95541	4.29143	4.36374	4.01065	3.87239	3.99965	4.45561	3.49703	4.17882	4.38887	3.93524	4.46462	4.07923	4.4346	3.97181
ID443	3.96565	4.23546	4.28614	3.83789	3.71	3.99371	4.41762	3.54533	4.15041	4.39629	3.99534	4.4074	3.72382	4.42096	3.97337
ID444	3.82456	4.27057	4.32706	3.86031	3.85526	4.13135	4.38667	3.90483	4.14871	4.44205	4.02467	4.46175	3.93607	4.53337	3.84866
ID445	3.94012	4.12921	4.19802	3.9771	3.79678	4.04068	4.33636	3.5189	4.08625	4.35258	3.93019	4.28285	3.91647	4.36596	3.97097
ID446	3.86462	4.34809	4.16381	3.82029	3.89228	4.07009	4.40952	3.76209	4.15107	4.40708	3.94455	4.37674	3.51151	4.47323	3.8679
ID447	3.95553	4.37435	4.26926	3.86892	3.96628	4.12947	4.52099	3.77623	4.24238	4.47264	3.96292	4.49039	3.77261	4.52297	3.97109
ID448	4.02038	4.25378	4.28367	3.99319	3.91452	4.04966	4.4596	3.63657	4.11198	4.42101	3.91667	4.43419	4.02378	4.43892	3.9468
ID449	3.91977	4.07236	4.29229	3.96239	3.83695	4.02511	4.40323	3.44151	4.06548	4.327	3.85396	4.39191	3.99565	4.46056	3.92634
ID450	4.0012	4.28408	4.31093	4.03556	3.96471	4.16999	4.51385	3.41142	4.18376	4.52503	3.94628	4.51245	3.85653	4.48913	4.01367
ID451	4.03128	4.23343	4.30583	4.07663	3.77492	4.05177	4.4626	3.49279	4.07242	4.43468	3.92239	4.35347	4.09266	4.4652	4.04763
ID452	4.03073	4.1666	4.26897	4.03988	3.74767	3.9478	4.45187	3.367	3.78624	4.41029	3.75484	4.39821	4.04917	4.38493	4.02497
ID453	3.99011	4.22633	4.36375	4.03881	3.86944	4.07554	4.43666	3.60506	4.07789	4.43317	4.06897	4.50378	4.08707	4.48556	4.01976
ID454	3.93623	4.28365	4.26212	4.09527	3.892	4.03928	4.46133	3.43366	4.03732	4.41284	3.92877	4.43039	4.1647	4.42511	4.00154
ID455	3.79428	4.30287	3.9981	3.79495	3.66651	3.71459	4.27468	3.70205	3.94808	4.19489	3.72768	4.14222	3.69078	4.11161	3.79179
ID456	3.90779	4.06996	4.30709	3.6062	3.77828	3.99596	4.35963	3.55784	3.8525	4.29268	3.74792	4.42832	3.81791	4.40561	3.69263
ID457	3.99418	4.44667	4.25322	3.8616	3.82313	3.97279	4.54584	3.81138	4.04086	4.60175	3.93305	4.50442	3.75869	4.45801	3.93872
ID458	4.03806	4.43644	4.32813	4.09498	3.84966	3.99798	4.50813	3.78281	4.05184	4.47621	3.93905	4.47065	4.11669	4.47805	4.04184
ID459	3.95611	4.29381	4.18647	3.96866	3.64736	3.93386	4.41584	3.64277	3.9358	4.35749	3.75606	4.3456	3.9477	4.27919	3.95106
ID460	3.95404	4.23173	4.20821	3.94634	3.7626	4.01077	4.36044	3.69044	3.92394	4.34982	3.78641	4.32031	3.96738	4.40956	3.8783
ID461	3.92166	4.28907	4.19713	3.93022	3.74354	3.89034	4.43677	3.74588	3.93608	4.40022	3.76414	4.39319	3.73281	4.27951	3.85957
ID462	3.83368	4.03347	4.21983	3.9132	3.70021	3.94545	4.30855	3.34694	3.94384	4.36266	3.80393	4.3928	3.91647	4.29497	3.79559
ID463	3.94548	4.18808	4.27537	3.94498	3.72589	3.94065	4.40402	3.38479	4.03774	4.39771	3.8162	4.39785	3.94917	4.45399	3.893
ID464	4.07855	4.40771	4.13195	3.81354	3.84781	3.87518	4.38098	3.77505	4.15198	4.38221	3.83096	4.3016	3.71714	4.29	3.91897
ID465	3.97841	4.21959	4.22348	3.9714	3.84573	3.95163	4.44588	3.41057	4.10531	4.28171	3.92843	4.38191	4.07804	4.40383	3.9765
ID466	3.75406	4.20095	4.12637	3.70628	3.86757	4.00229	4.3912	3.47406	4.10079	4.35727	3.8968	4.34725	3.46283	4.45213	3.70074
ID467	3.87386	4.3793	4.03777	3.67024	3.83128	3.86921	4.43399	3.68573	3.99638	4.36675	3.80533	4.3204	3.36307	4.42028	3.76343
ID468	3.80138	4.13801	4.09206	3.85914	3.78627	3.91263	4.32164	3.549	4.07502	4.23173	3.86784	4.22564	3.86816	4.25706	3.79445
ID469	3.90497	4.31801	4.21785	3.73417	3.83027	3.97013	4.48464	3.65303	4.04153	4.51668	3.90945	4.46027	3.34982	4.53873	3.82649
ID470	3.84598	4.22984	4.20161	3.93796	3.74317	3.96946	4.41402	3.47422	4.01041	4.35837	3.87644	4.35819	3.96471	4.3726	3.87732
ID471	3.9457	4.30113	4.22885	3.94301	3.7533	4.00146	4.36952	3.49553	4.20084	4.48145	3.98448	4.37356	3.7915	4.38009	4.02455
ID472	3.96473	4.27335	4.26612	3.87608	3.8662	4.07575	4.39939	3.70473	4.23396	4.46399	4.00834	4.39544	3.87393	4.51862	3.95134
ID473	4.11216	4.25764	4.2438	3.94159	3.95012	4.12402	4.4305	3.66692	4.11895	4.42156	3.95558	4.47802	3.94315	4.44456	3.96501
ID474	3.92491	4.19208	4.23763	3.9688	3.849	4.07325	4.42843	3.52455	4.05059	4.34105	3.858	4.31968	3.95206	4.34327	3.92135
ID475	3.99633	4.17541	4.26004	3.98972	3.83488	4.08864	4.43998	3.54982	4.0308	4.40903	3.95652	4.38849	3.87197	4.45627	4.02884
ID476	4.00835	4.27804	4.24066	4.01046	3.84035	3.95268	4.44528	3.62003	4.01159	4.41557	3.79824	4.39448	3.96144	4.39832	3.95027
ID477	3.93999	4.27297	4.43424	4.07004	3.86532	4.12239	4.48914	3.46167	4.13231	4.44924	4.05838	4.50378	4.21112	4.49837	3.99101
ID478	4.03947	4.30294	4.21382	3.93565	3.86507	4.05938	4.39477	3.57335	4.04367	4.43127	3.88902	4.38762	3.76083	4.42949	4.05457
ID479	4.01695	4.06889	4.36857	3.92137	3.93494	4.18443	4.43898	3.35113	4.20205	4.48154	4.02773	4.53228	3.8492	4.57609	3.94044
ID480	4.23178	4.49704	4.25859	3.71963	4.11164	3.90416	4.39413	3.8138	4.23642	4.50399	3.89945	4.52479	3.85958	4.52725	3.78376
ID481	4.00451	3.98386	4.24623	3.8136	3.84895	4.14958	4.4122	3.44641	4.15177	4.36895	3.93739	4.34751	3.80694	4.45833	4.00364
ID482	3.89467	4.37615	4.11372	3.75856	3.72872	3.96506	4.48449	3.9295	3.96505	4.41747	3.85769	4.34234	3.48191	4.40089	3.8392
ID483	4.12899	4.34422	4.39519	3.87613	4.02287	4.03942	4.46267	3.67575	4.17026	4.52745	3.89111	4.6097	3.98431	4.58562	3.79495
ID484	3.93059	4.34772	4.2258	4.01804	3.69098	3.91042	4.3776	3.59944	3.99876	4.38788	3.80196	4.30804	3.93017	4.36013	3.9522
ID485	3.89056	4.28979	4.28398	3.9045	3.86496	4.11777	4.45825	3.74292	4.19227	4.43538	3.94635	4.47546	3.77584	4.50235	3.92708
ID486	3.98849	4.22197	4.24234	4.03432	3.84173	4.04547	4.44186	3.50511	4.01296	4.42004	3.87459	4.41488	3.98617	4.39717	3.99941
ID487	3.92493	4.25081	4.03141	3.74311	3.7041	3.82826	4.38025	3.58522	3.80343	4.32474	3.61046	4.23122	3.51065	4.26387	3.86323
ID488	4.012	4.28858	4.29125	3.92832	3.85937	4.11161	4.51053	3.6255	4.25653	4.4791	4.04911	4.48245	3.84076	4.51391	4.02026
ID489	3.95079	4.27097	4.11616	3.78012	3.80403	3.84567	4.32387	3.51573	3.96371	4.34356	3.73583	4.36432	3.79682	4.35334	3.74046
ID490	4.01829	4.03302	4.32337	3.96745	3.86789	4.13483	4.46928	3.34696	4.11467	4.53032	3.97633	4.49234	3.97681	4.52558	3.98647
ID491	3.87991	4.39311	4.15443	3.96108	3.71131	3.811	4.42445	3.73752	3.94915	4.37664	3.73035	4.35967	3.90383	4.28777	3.86365
ID492	3.88269	4.24481	4.22031	3.90387	3.80319	4.00075	4.3981	3.58029	4.10286	4.3413	3.83615	4.34894	3.80176	4.41805	3.95521
ID493	3.89574	4.04392	4.29443	3.86102	3.83746	4.16441	4.4737	3.33562	4.13936	4.44632	3.94158	4.47479	3.89208	4.55618	3.93353
ID494	4.04532	4.40865	4.26266	4.00494	3.82321	4.00103	4.48777	3.72259	3.96429	4.45646	3.79468	4.41309	3.97195	4.47572	4.01296
ID495	3.80341	4.41219	3.99714	3.62452	3.74093	3.80684	4.40125	3.81193	4.10839	4.29374	3.88036	4.22166	3.41562	4.2511	3.87404
ID496	3.66191	4.331	3.9943	3.88697	3.65944	3.83869	4.28625	3.64202	4.04315	4.24182	3.76282	4.2096	3.56545	4.23569	3.72042
ID497	3.86598	4.3308	4.13657	3.99811	3.80209	3.94423	4.45528	3.70921	4.00881	4.37312	3.81712	4.31755	3.91287	4.33653	3.92355
ID498	4.2153	4.61574	4.4142	3.94912	4.19799	4.22126	4.61807	4.1566	4.40045	4.64778	4.11405	4.63702	3.98645	4.69709	4.02791
ID499	3.97096	4.26036	4.26639	3.89742	3.82505	3.99569	4.4446	3.7274	4.02409	4.50108	3.90608	4.42662	3.89339	4.443	4.0121
ID500	3.91412	4.30402	4.19934	3.878	3.81839	4.01236	4.40462	3.84192	4.02557	4.40938	3.855	4.38861	3.7488	4.40237	3.85687
ID501	3.85049	4.24292	4.22815	3.90589	3.73699	3.9972	4.44117	3.57074	4.18002	4.38739	3.90261	4.3415	3.79038	4.4596	3.96032
ID502	4.11981	4.08086	4.43962	3.95007	4.00232	4.27021	4.52041	3.44935	4.28895	4.51191	4.10698	4.57882	3.97469	4.65666	4.02458
ID503	3.83037	4.16369	4.26676	3.92285	3.71051	3.9535	4.42688	3.59286	4.12775	4.41017	3.94091	4.3859	3.80714	4.48112	3.88961
ID504	3.99019	4.28967	4.22945	3.93259	3.7461	3.94682	4.41266	3.70541	3.92877	4.35849	3.78375	4.37966	3.96554	4.37984	3.95758
ID505	3.97133	4.04719	4.31142	4.00449	3.71544	4.01698	4.45043	3.63283	3.7577	4.38352	3.75544	4.38614	4.07734	4.38294	4.00656
ID506	3.94639	4.23217	4.28722	3.92842	3.75018	3.89956	4.39477	3.60803	3.98931	4.308	3.71828	4.35589	3.996	4.38369	3.94025
ID507	3.90589	4.32472	4.11489	3.87607	3.77637	3.75126	4.35053	3.69573	3.94602	4.30325	3.70708	4.28106	3.84996	4.247	3.82027
ID508	3.90135	4.28049	4.29615	3.97946	3.80722	4.0465	4.39988	3.7	4.14009	4.43765	4.00531	4.43058	3.78817	4.45846	3.92983
ID509	3.82189	4.3453	4.10625	3.95372	3.71063	3.82914	4.32274	3.57495	3.90851	4.31323	3.78921	4.25837	3.90593	4.19334	3.84459
ID510	3.88093	4.36658	4.10878	3.84509	3.70262	3.83235	4.41132	3.77286	4.05598	4.30739	3.82801	4.28045	3.62206	4.32348	3.90473
ID511	3.88813	4.22549	4.22733	3.81879	3.85478	4.05009	4.33732	3.42371	4.19502	4.29685	4.02064	4.34169	3.77372	4.38196	3.90345
ID512	3.99169	4.10081	4.28288	4.04823	3.9072	4.0453	4.47466	3.28802	3.9024	4.42877	3.8253	4.42893	4.05573	4.45779	3.92118
ID513	3.76986	4.2479	3.99658	3.61947	3.78524	3.95911	4.39278	3.53799	4.08547	4.30448	3.89718	4.21049	3.26601	4.28436	3.77012
ID514	3.86392	4.31832	4.29828	3.97703	3.73077	3.95934	4.37337	3.54338	4.16055	4.48915	3.92037	4.40687	3.92625	4.4859	3.94407
ID515	4.06639	4.3648	4.27682	3.9825	3.90864	4.12321	4.56967	3.62836	4.18147	4.53935	4.02534	4.48136	3.84459	4.48089	4.18838
ID516	3.94689	4.30093	4.28962	3.9338	3.86084	4.04472	4.42639	3.51176	4.18419	4.35239	3.9732	4.45535	4.02364	4.45179	3.93662
ID517	3.87203	4.10482	4.21952	3.97031	3.86332	4.00819	4.38648	3.33532	4.00594	4.37666	3.83816	4.40511	3.91143	4.37519	3.87627
ID518	3.97101	4.18518	4.32141	4.01167	3.95662	4.11624	4.50673	3.4655	4.09161	4.46604	3.97194	4.47982	4.03303	4.55995	3.99752
ID519	3.8614	4.00484	4.14445	3.78785	3.75325	4.0282	4.43413	3.39204	3.95222	4.39236	3.88862	4.40588	3.54945	4.359	3.94128
ID520	3.71864	4.22336	4.06797	3.70569	3.75517	3.93354	4.39832	3.61803	3.88978	4.42528	3.80757	4.3586	3.22624	4.40089	3.75683
ID521	3.77997	4.34881	4.18248	3.92454	3.74908	3.85735	4.44489	3.77994	4.06048	4.37629	3.83255	4.37414	3.73318	4.36477	3.81043
ID522	4.05066	4.1397	4.23818	3.93445	3.51478	4.17766	4.46039	3.44088	4.13851	4.46798	3.90612	4.21313	3.65107	4.3808	4.07996
ID523	3.9387	4.23371	4.32574	3.91482	3.82851	4.0757	4.48908	3.62702	4.16762	4.48174	4.07496	4.4488	3.8705	4.46304	4.04438
ID524	3.89238	3.96871	4.14056	3.77546	3.82035	4.02872	4.35395	3.40496	4.00895	4.36982	3.83414	4.3572	3.55915	4.4717	3.88907
ID525	3.94074	4.38933	4.35363	3.81488	4.09574	4.20468	4.55574	3.78993	4.32295	4.60563	4.11909	4.64395	3.84168	4.65189	3.79532
ID526	4.05513	4.5243	4.23769	4.04933	3.80246	3.96367	4.48682	3.8438	4.13384	4.46199	3.95961	4.38734	3.98489	4.38106	3.98312
ID527	4.02657	4.3862	4.18391	3.89859	3.78782	3.92225	4.38832	3.95033	3.99384	4.45816	3.80043	4.37272	3.66126	4.31169	3.92551
ID528	4.05619	4.40862	4.17163	4.0759	3.86393	3.98317	4.47687	3.65477	4.01067	4.43268	3.83284	4.42398	3.96433	4.35199	4.0208
ID529	4.00145	4.30855	4.29776	3.98659	3.88777	4.13522	4.43801	3.74181	4.22486	4.45338	3.98838	4.40488	3.89792	4.4921	3.96474
ID530	3.92237	4.38314	4.28237	4.01038	3.82609	4.02503	4.42968	3.85199	4.06264	4.39421	3.97398	4.39791	4.04414	4.43961	3.95907
ID531	3.95134	4.13434	4.17503	3.83717	3.64454	3.82326	4.33627	3.41053	3.9872	4.22652	3.78331	4.23685	3.91257	4.30942	3.9427
ID532	4.08415	4.25482	4.12837	3.66084	3.82357	3.95381	4.37124	3.81855	3.96619	4.37826	3.7725	4.37203	3.59041	4.38903	3.79589
ID533	3.94699	4.16886	4.14202	3.98746	3.72401	3.95393	4.40726	3.53655	4.0371	4.3374	3.86184	4.27742	3.72142	4.34431	4.01871
ID534	3.98702	4.50397	4.08166	3.87322	3.86299	3.95234	4.41057	3.91503	4.17883	4.37851	3.99542	4.34355	3.57894	4.2669	3.93671
ID535	3.94876	4.37619	4.22002	3.91643	3.8064	3.94093	4.38083	3.72308	4.06988	4.34789	3.87119	4.30958	3.9217	4.30486	3.8957
ID536	3.76892	4.22193	4.20161	3.99715	3.71913	3.9366	4.4417	3.58064	4.09462	4.5674	3.90226	4.38733	3.79521	4.4527	3.88175
ID537	3.93001	4.21261	4.1567	3.77667	3.73503	4.03919	4.45058	3.60113	4.01224	4.36541	3.92997	4.34401	3.56746	4.44021	3.97493
ID538	4.01906	4.06748	4.2574	3.96586	3.8021	4.04367	4.43051	3.47056	3.92797	4.38705	3.78562	4.40036	3.92154	4.38064	3.99075
ID539	3.95476	4.10555	4.24836	3.935	3.74641	4.07653	4.42655	3.41231	4.00979	4.35137	3.86852	4.38949	4.0256	4.42015	3.96259
ID540	3.90088	4.21637	4.21482	3.99451	3.87889	3.98948	4.4508	3.65446	3.99474	4.41005	3.8169	4.38371	3.88688	4.43864	3.95716
ID541	4.00451	4.20578	4.24735	3.93143	3.87792	4.13768	4.47065	3.60712	4.11995	4.45953	4.00055	4.34671	3.69835	4.51317	4.06152
ID542	3.85473	4.07987	4.09861	3.75028	3.72647	3.88587	4.37035	3.5297	3.93743	4.38259	3.80014	4.28028	3.4919	4.37257	3.88799
ID543	3.96725	4.42859	4.27688	4.00139	3.82616	3.98672	4.43331	3.75753	4.14517	4.43101	4.00926	4.38156	4.05988	4.37971	3.95055
ID544	4.07586	4.44813	4.23997	3.87203	3.84552	3.99841	4.47767	3.82153	4.29999	4.4901	4.02942	4.39358	3.82159	4.42129	4.00574
ID545	3.966	4.28636	4.25174	3.93072	3.90301	4.03311	4.45754	3.56595	4.08886	4.35006	3.89102	4.42815	3.92295	4.38247	3.94921
ID546	4.02477	4.12544	4.22373	3.9852	3.77442	4.09494	4.37859	3.43666	4.12293	4.40597	3.95416	4.2749	3.8508	4.40059	4.02059
ID547	3.93782	4.1692	4.24242	3.98587	3.7997	4.01492	4.49389	3.45135	3.96319	4.46789	3.86481	4.45419	3.84018	4.45141	4.02889
ID548	4.02256	4.43823	4.30391	3.86329	3.8839	4.08108	4.53684	3.85598	4.2063	4.53334	3.95919	4.52952	3.8116	4.50837	4.00713
ID549	3.90521	4.34081	4.15488	3.95764	3.72862	3.94566	4.37339	3.60964	4.05316	4.37771	3.88974	4.33604	3.9706	4.26329	3.81681
ID550	3.87178	4.4176	4.3258	3.81654	3.88965	4.13886	4.4216	3.90913	4.29665	4.51122	4.10723	4.46246	3.85049	4.57114	3.93419
ID551	4.06379	4.36702	4.40794	4.10516	3.92641	4.10694	4.54431	3.54535	4.07867	4.5262	3.91509	4.50305	4.13505	4.47877	4.01242
ID552	3.98559	4.19521	4.22781	3.98731	3.76841	3.88875	4.41996	3.49412	3.99019	4.37964	3.77599	4.39889	3.91163	4.37004	3.98116
ID553	3.99297	4.1251	4.26514	3.95135	3.73943	4.00227	4.4243	3.50761	4.04779	4.45961	3.92056	4.41529	3.8887	4.42403	3.96373
ID554	3.75578	4.04528	4.08581	3.88231	3.7188	4.0123	4.28415	3.39448	4.03343	4.2528	3.77106	4.17827	3.67461	4.32799	3.81839
ID555	4.09331	4.43501	4.37516	4.06011	4.0956	4.18617	4.55679	3.6855	4.31936	4.52194	4.13603	4.53216	4.1505	4.59081	3.96686
ID556	4.0311	4.20682	4.09502	4.04509	3.93379	4.20408	4.51079	3.50722	4.32768	4.60195	4.14479	4.59156	3.77149	4.65957	4.08804
ID557	4.05747	4.48193	4.18216	4.01219	3.68579	3.79494	4.50381	3.79811	4.01819	4.43593	3.84048	4.40197	3.89057	4.32538	4.02493
ID558	3.84554	4.19945	4.1417	3.74478	3.87401	4.04532	4.35842	3.57953	4.08854	4.35406	3.92757	4.31583	3.6101	4.40706	3.79054
ID559	3.94837	4.2386	4.3385	3.97967	3.81835	4.10964	4.56798	3.45222	4.25162	4.54307	4.08915	4.53528	3.92862	4.50398	4.07486
ID560	3.90755	4.43913	4.1857	3.83327	3.87491	4.039	4.47926	3.80569	4.20049	4.46418	3.99525	4.40657	3.75504	4.42748	3.94793
ID561	3.94414	4.24882	4.22607	3.86678	3.8558	3.9553	4.42949	3.66221	3.92289	4.35079	3.76978	4.40649	3.98002	4.41722	3.84491
ID562	3.94536	4.13108	4.19425	3.93059	3.79788	3.97081	4.39319	3.5664	4.03617	4.39337	3.85759	4.27095	3.78955	4.36396	4.03463
ID563	3.90448	4.24005	4.1719	3.95901	3.71162	3.87029	4.35852	3.61012	3.94176	4.39907	3.77362	4.37625	3.79932	4.34052	3.88259
ID564	3.85638	4.41115	4.17431	3.89067	3.81834	3.91096	4.39169	3.94762	4.05393	4.40846	3.80792	4.39898	3.70738	4.32559	3.82678
ID565	3.90766	4.04465	4.28548	3.96515	3.77573	4.00232	4.34965	3.26443	4.02897	4.323	3.93789	4.3982	4.0386	4.34811	3.93919
ID566	4.14308	4.39923	4.38555	3.78965	4.15527	4.14352	4.49791	3.77054	4.2698	4.53416	4.08287	4.69627	3.87682	4.66802	3.80397
ID567	4.13386	4.40295	4.34909	3.84172	3.89146	4.06461	4.5769	3.76162	4.069	4.60924	3.94086	4.59522	3.77498	4.53607	4.00156
ID568	3.85165	4.30505	4.12147	3.88237	3.76114	3.92391	4.36304	3.6524	4.01286	4.30748	3.77227	4.28364	3.8438	4.2565	3.85444
ID569	3.94638	4.32885	4.28822	3.85918	3.86544	4.01315	4.44378	3.85604	4.2468	4.49409	4.06688	4.48425	3.91545	4.56024	3.90103
ID570	3.77264	4.28657	4.15355	3.84933	3.84297	3.9828	4.44333	3.54986	4.18742	4.42006	3.96017	4.36633	3.53775	4.40313	3.81046
ID571	3.93839	4.42947	4.11461	3.86977	3.78441	3.8491	4.35663	3.75836	4.05233	4.3218	3.91261	4.32035	3.81365	4.28518	3.8682
ID572	3.99716	4.28184	4.26845	3.88925	3.89582	4.07387	4.42565	3.76415	4.16384	4.45493	3.94474	4.45769	3.81353	4.47105	3.84857
ID573	4.17388	4.41773	4.36984	3.96122	4.11972	4.21937	4.56836	3.73335	4.38674	4.5666	4.16401	4.56725	3.89936	4.57274	4.01649
ID574	3.92632	4.16084	4.296	3.90414	3.84297	4.08359	4.43019	3.49044	4.21615	4.43708	4.01679	4.45929	3.92416	4.50751	3.99051
ID575	4.15165	4.48397	4.34962	4.01934	4.03226	4.12048	4.51347	3.73764	4.30197	4.54676	4.0484	4.61456	4.04321	4.58803	3.91549
ID576	3.75696	4.01848	4.08583	3.9147	3.7128	3.97433	4.27979	3.38131	3.90484	4.2539	3.77231	4.28532	3.72374	4.35926	3.86863
ID577	3.94792	4.093	4.32787	3.98614	3.87	4.13662	4.42961	3.28346	4.15012	4.51087	4.04681	4.48396	3.88938	4.53419	4.00483
ID578	4.04026	4.34064	4.18266	3.76517	3.76193	3.92496	4.42069	3.84407	4.028	4.46482	3.83619	4.38815	3.6142	4.37585	3.90186
ID579	3.90228	4.29168	4.27596	3.98542	3.84187	3.99545	4.4613	3.71172	4.03001	4.39718	3.83695	4.43819	3.99056	4.42308	3.86948
ID580	3.97003	4.26644	4.25661	4.02043	3.82541	3.94733	4.45454	3.4497	4.01141	4.41087	3.89619	4.38287	4.04394	4.40112	3.98761
ID581	4.03345	4.39846	4.26496	3.95853	3.80562	3.91183	4.41704	3.70568	3.91119	4.48002	3.71604	4.47155	3.99862	4.40992	3.92145
ID582	3.88537	4.35982	3.99138	3.79324	3.67436	3.61357	4.28393	3.71621	3.90251	4.22876	3.66575	4.16021	3.67668	4.05508	3.83417
ID583	4.1083	4.30858	4.36728	3.79249	4.21433	4.09943	4.43333	3.85693	4.21244	4.55393	4.00019	4.62357	3.64234	4.66155	3.84052
ID584	3.92674	4.26904	4.24261	3.93552	3.80637	4.09362	4.43451	3.57137	4.08478	4.35575	3.87312	4.32256	3.94068	4.39873	3.90749
ID585	3.88528	4.21574	4.23207	3.95669	3.83376	3.94885	4.34961	3.39035	4.06002	4.33507	4.00791	4.36288	4.03677	4.38666	3.91239
ID586	3.67987	3.82791	NA	NA	NA	NA	NA	3.41183	NA	NA	NA	NA	NA	NA	NA
ID587	3.85499	4.04773	4.23994	3.87072	3.7276	4.0226	4.35488	3.32098	4.01817	4.32417	3.78644	4.39097	3.80348	4.40946	3.83909
ID588	3.93566	4.29405	4.2113	3.92844	3.8014	3.97072	4.35812	3.70821	4.02144	4.34668	3.89662	4.28923	3.94512	4.37712	3.90294
ID589	4.01718	4.31442	4.3255	4.05203	3.91953	3.98445	4.46725	3.53341	4.05436	4.44315	3.93997	4.51736	4.14896	4.45522	3.97833
ID590	3.95013	4.34511	4.24847	4.00845	3.77144	3.95956	4.39588	3.62468	4.04558	4.35432	3.90541	4.3341	4.00737	4.34408	3.95525
ID591	4.06103	4.36928	4.42474	4.04455	3.94456	4.30325	4.53224	3.64347	4.35377	4.59775	4.1292	4.57278	4.03172	4.59984	4.01534
ID592	4.01537	4.37908	4.37618	4.0484	4.05265	4.04652	4.57008	3.71591	4.08931	4.48996	3.95774	4.51894	4.12016	4.53652	3.87851
ID593	3.93696	4.18303	4.19208	3.89316	3.82084	4.05542	4.42056	3.62013	4.15233	4.40181	3.90706	4.42172	3.70682	4.46789	3.97302
ID594	4.00555	4.34516	4.31864	4.0136	3.97955	4.10013	4.51312	3.78552	4.16248	4.47101	3.96028	4.48795	4.01884	4.4725	3.91059
ID595	3.89193	4.30081	4.1897	3.94987	3.83756	4.02874	4.38763	3.62308	4.08476	4.42626	3.93074	4.34102	3.81426	4.39034	3.96024
ID596	3.95259	4.47258	4.2555	3.83833	3.70797	4.08782	4.41259	4.20018	4.06848	4.33535	3.83975	4.33401	3.791	4.37271	3.9953
ID597	3.96726	4.16112	4.36612	3.97376	3.81399	4.16234	4.44764	3.32635	4.21645	4.48409	4.00338	4.46851	3.92287	4.51606	3.96755
ID598	3.96283	4.43815	4.32065	4.01802	3.76889	4.02805	4.42663	3.99793	4.12955	4.4297	3.96747	4.41493	4.04434	4.46265	3.98674
ID599	3.8557	4.28997	4.13172	3.86759	3.79642	3.95848	4.41653	3.74771	4.06598	4.33086	3.87456	4.31536	3.67106	4.34405	3.93302
ID600	3.57141	4.10845	NA	NA	4.16646	NA	NA	3.81809	3.70587	NA	3.51967	4.20414	NA	4.24251	NA
ID601	4.05406	4.38916	4.29072	3.86955	4.02757	4.02112	4.49599	3.7458	4.16655	4.45562	3.98417	4.52758	3.90175	4.55115	3.80729
ID602	4.09165	4.51176	4.29006	3.83096	3.88689	4.11037	4.55085	3.94976	4.2507	4.52086	4.02761	4.48806	3.77649	4.54251	4.06925
ID603	3.92654	4.36463	4.26133	3.97593	3.93997	4.03457	4.42978	3.69915	4.13689	4.42891	4.02119	4.41962	4.03817	4.39217	3.82806
ID604	3.91274	4.13213	4.18578	3.79278	3.8395	3.9774	4.4093	3.45529	4.0353	4.37658	3.99835	4.33087	3.60935	4.42754	3.94609
ID605	3.94593	4.22515	4.17614	3.90293	3.70763	3.8722	4.39793	3.63868	3.86876	4.35975	3.71611	4.40972	3.84391	4.30395	3.89832
ID606	3.98658	4.35112	4.34099	4.01593	3.79647	4.04582	4.40715	3.89443	4.0309	4.40094	3.94344	4.40718	4.0985	4.46789	3.96838
ID607	3.92934	4.25106	4.26843	3.97808	3.78676	3.9862	4.40723	3.61855	3.97149	4.47905	3.82391	4.39902	3.87912	4.44445	3.9295
ID608	3.9302	4.08922	4.24291	3.91906	3.82468	4.09496	4.42341	3.78106	4.03834	4.38392	3.88644	4.35098	3.92576	4.39852	3.98847
ID609	3.74072	4.11676	4.09044	3.76817	3.6194	3.82871	4.33765	3.40489	4.02833	4.31223	3.84099	4.27325	3.51719	4.32328	3.81973
ID610	3.983	4.25727	4.25373	3.98674	3.93249	3.93912	4.46365	3.5844	4.02526	4.36994	3.8358	4.34879	3.94623	4.34539	3.95177
ID611	3.90229	4.38469	4.29478	4.1067	3.9332	4.01496	4.49517	3.72707	4.04436	4.42135	3.89996	4.40757	3.97122	4.40016	3.89714
ID612	4.04906	4.50476	4.16225	NA	4.08118	3.90321	4.3872	4.04487	4.23208	4.42446	3.96557	4.54438	3.31871	4.54392	3.59733
ID613	4.13466	4.40977	4.35967	4.10055	4.12042	4.15057	4.57797	3.63087	4.22703	4.54533	4.11314	4.60284	4.10023	4.56296	3.96873
ID614	3.84035	4.25219	4.24352	3.86695	3.69724	3.94568	4.40389	3.81071	4.08391	4.30369	3.84639	4.38734	3.76166	4.4457	3.85842
ID615	3.78948	4.13598	4.17716	3.94324	3.69654	3.81824	4.37956	3.30498	3.85432	4.32935	3.68692	4.35292	3.84843	4.2412	3.85153
ID616	3.83535	4.32768	4.05539	3.96388	3.68246	3.76466	4.34475	3.62295	3.80313	4.33161	3.67942	4.24281	3.86844	4.18576	3.88293
ID617	3.96841	4.29285	4.31317	3.90918	3.9207	4.12835	4.46065	3.50468	4.17287	4.51614	3.9343	4.50432	3.92433	4.54507	3.93517
ID618	3.84696	4.26435	4.27074	3.99022	3.78023	3.87887	4.38671	3.57567	3.97808	4.41864	3.88189	4.38557	3.98832	4.28258	3.89186
ID619	3.89583	4.26229	4.23459	3.98704	3.84952	4.0139	4.37625	3.5968	4.08614	4.41328	3.88976	4.4191	3.89488	4.35591	3.89014
ID620	3.90092	4.18011	4.15048	3.95499	3.75224	4.00395	4.42381	3.50839	3.9218	4.37495	3.78177	4.29501	3.73613	4.37072	3.9528
ID621	3.87905	4.19713	4.32375	3.94601	3.9552	4.17712	4.40662	3.62788	4.23032	4.50062	4.02036	4.48235	3.91638	4.55817	3.856
ID622	3.82095	4.2289	4.01489	3.78376	3.72677	3.70907	4.33969	3.68984	3.91251	4.27376	3.63587	4.21811	3.60424	4.2446	3.88455
ID623	3.98569	4.33592	4.35188	3.88672	3.78195	3.99029	4.52603	3.66015	4.0698	4.53652	3.94454	4.47983	3.87764	4.50979	3.97464
ID624	3.98546	4.29348	4.26584	4.03934	3.8706	4.01065	4.51114	3.51869	4.06531	4.37472	3.85024	4.39465	4.11135	4.42236	3.97743
ID625	4.02041	4.31052	4.27681	4.0203	3.76761	4.00025	4.48747	3.61101	4.03886	4.46348	3.84222	4.42314	3.96525	4.41678	3.95811
ID626	3.96473	4.30682	4.20726	4.04021	3.72732	3.95446	4.44182	3.72782	4.04851	4.43701	3.73614	4.37586	3.86437	4.4235	3.93058
ID627	4.03082	4.25384	4.31512	3.94646	3.95808	4.10048	4.50125	3.54962	4.12137	4.46694	3.96173	4.54931	4.00128	4.53105	3.89554
ID628	3.89563	4.17817	4.0884	3.8584	3.7151	3.77242	4.34048	3.51821	3.8083	4.28403	3.64175	4.24056	3.77209	4.21485	3.84889
ID629	3.99961	4.20549	4.26629	3.90555	3.73008	3.97761	4.43944	3.44023	4.0781	4.44869	3.84797	4.37553	3.7856	4.43617	4.0261
ID630	3.95279	4.47975	4.14239	3.87317	3.82787	3.83405	4.37092	3.85171	4.10638	4.29611	3.86368	4.26323	3.88542	4.27962	3.9299
ID631	3.99261	4.23898	4.30301	3.88942	3.9614	4.05738	4.48524	3.53287	4.09558	4.5602	3.82303	4.53042	3.78548	4.49006	3.81862
ID632	3.84653	4.29028	4.12569	3.95317	3.61551	3.75929	4.40794	3.60336	3.86731	4.30386	3.693	4.32463	3.95206	4.25152	3.89004
ID633	3.89384	4.38182	4.18889	3.98351	3.88121	4.02676	4.40529	3.80068	4.15841	4.4201	3.95594	4.39056	3.85143	4.40385	3.85016
ID634	3.98235	4.27989	4.29026	4.0655	3.85817	4.00256	4.45963	3.54839	4.05837	4.44697	3.92515	4.4116	4.04438	4.43379	4.00719
ID635	4.09452	4.30581	4.30768	3.91686	3.85118	4.15319	4.53344	3.70271	4.10818	4.56136	3.87788	4.55901	3.92321	4.5549	4.04016
ID636	3.98724	4.29753	4.3109	3.82625	3.90307	4.11517	4.53331	3.70482	4.21178	4.47726	4.02062	4.52308	3.87718	4.55247	3.9106
ID637	3.94272	4.24119	4.3199	4.02415	3.90436	4.06413	4.4102	3.51634	4.06505	4.3874	3.96096	4.40251	4.1275	4.4448	3.90233
ID638	4.00021	4.1847	4.18227	3.95857	3.66903	4.0553	4.45495	3.54757	4.02858	4.48081	3.84208	4.27501	3.79758	4.35718	4.07536
ID639	4.00678	4.41323	4.35291	4.02621	3.79215	4.01549	4.41553	3.58526	4.14685	4.46861	3.95311	4.43876	4.01706	4.52139	3.94683
ID640	4.00317	4.34165	4.22345	4.01751	3.84357	4.0097	4.45874	3.61141	4.05222	4.41691	3.86654	4.37059	3.89229	4.39988	3.97757
ID641	4.01292	4.27985	4.37004	3.85913	3.729	4.14824	4.48605	3.67568	4.31409	4.45081	4.08068	4.48128	3.99298	4.45126	4.01916
ID642	3.97765	4.22	4.24225	3.9358	3.88435	4.13826	4.41989	3.5451	4.08284	4.40635	3.90735	4.37111	3.80532	4.43335	3.99028
ID643	4.00665	4.25981	4.25899	3.56089	4.12792	4.07969	4.43612	3.68591	4.29359	4.48468	4.0118	4.52488	3.59698	4.56956	3.59443
ID644	4.13161	4.45846	4.28126	3.59365	4.14529	4.05041	4.36521	3.85565	4.27878	4.47102	4.04019	4.59654	3.68573	4.56698	3.64203
ID645	3.93979	4.13776	4.15869	3.78894	3.86856	4.03386	4.43616	3.4825	4.10837	4.37578	3.98816	4.35633	3.48889	4.43419	3.98308
ID646	4.03268	4.03866	4.30888	4.01496	3.784	3.92436	4.47208	3.29736	4.01808	4.42975	3.86126	4.47836	4.11494	4.41684	4.05266
ID647	3.99733	4.18318	4.21098	3.98718	3.77483	4.00086	4.38629	3.55115	4.11308	4.39116	3.92679	4.31545	3.79978	4.37336	4.0458
ID648	3.93742	4.30377	4.39747	3.98977	3.81022	4.24719	4.55335	3.66484	4.23619	4.57304	4.05464	4.58913	3.9334	4.60272	4.07163
ID649	4.05703	4.1903	4.34527	3.9914	3.87501	4.12601	4.46392	3.42462	4.12311	4.40996	3.94066	4.52213	4.01465	4.4942	4.0209
ID650	4.01052	4.42263	4.2524	3.91161	3.79675	4.01593	4.46327	4.00946	4.09525	4.44349	3.87718	4.40519	3.78027	4.45804	3.92697
ID651	4.11301	4.5492	4.16422	3.88884	3.92245	3.92662	4.53263	3.80849	4.23157	4.50819	3.96116	4.41415	3.80404	4.42599	4.02092
ID652	4.06625	4.40638	4.37343	3.9879	3.99403	4.07341	4.53442	3.73108	4.15068	4.5316	3.9467	4.57622	4.03062	4.579	3.94654
ID653	4.19157	4.37948	4.47197	3.93264	4.1935	4.25464	4.59545	3.66343	4.32029	4.59556	4.18869	4.64666	4.04887	4.68071	3.96861
ID654	3.9711	4.25837	4.28613	3.99598	3.7786	4.03176	4.43952	3.47459	4.09135	4.36777	3.92592	4.37862	4.04845	4.388	4.00922
ID655	3.87431	4.11697	4.11584	3.57991	3.77045	4.07134	4.39997	3.49432	4.11883	4.27671	3.99206	4.27716	3.33282	4.42419	3.90988
ID656	3.90937	4.1206	4.27276	3.96795	3.80077	4.04855	4.44064	3.5476	4.07675	4.4699	3.94625	4.4711	3.83912	4.47589	3.89949
ID657	3.91288	4.28759	4.09366	3.76766	3.73479	3.89762	4.31822	3.76793	3.98198	4.34095	3.75687	4.25822	3.62367	4.26968	3.83766
ID658	3.99517	4.22919	4.34235	3.96296	3.76054	3.9955	4.51892	3.42496	4.17992	4.49965	4.04943	4.46124	4.00146	4.41315	4.06298
ID659	3.87444	4.30242	4.19173	3.95853	3.78992	3.96581	4.39538	3.63819	4.06461	4.38539	3.86012	4.36133	3.74253	4.41825	3.94404
ID660	3.99886	4.42181	4.2922	4.08602	3.80252	3.96274	4.47674	3.71048	4.08849	4.54103	3.89469	4.43168	4.02784	4.37745	3.92797
ID661	3.9444	4.34109	4.34321	3.93601	3.8637	4.17519	4.39511	3.85063	4.1513	4.51495	4.05675	4.4809	4.01928	4.55795	3.98477
ID662	3.85916	4.04612	4.18771	3.83575	3.80772	3.89651	4.3613	3.4528	3.92811	4.34511	3.79598	4.26721	3.75149	4.36799	3.8529
ID663	3.88569	4.32509	4.30109	4.1232	3.75011	3.9343	4.39477	3.69924	3.97157	4.33414	3.81441	4.3479	3.9141	4.3079	3.94959
ID664	4.05406	4.27037	4.41951	3.97218	3.90672	4.18697	4.52562	3.5782	4.18829	4.54436	4.07279	4.57232	4.12789	4.58866	4.09024
ID665	3.89448	4.1106	4.20049	3.85304	3.8013	3.95088	4.45123	3.6462	4.01221	4.3437	3.91294	4.38012	3.8058	4.4129	3.97329
ID666	3.87875	4.14871	4.21586	3.93061	3.75738	3.85256	4.32178	3.35917	3.96844	4.28485	3.90537	4.34029	3.96528	4.33345	3.91493
ID667	3.83054	4.34625	4.17656	3.93457	3.7105	3.9192	4.37476	3.67062	4.01427	4.34687	3.8406	4.34282	3.91878	4.34257	3.8415
ID668	3.68265	4.17805	4.12399	3.91007	3.74157	3.91655	4.38903	3.62897	3.94732	4.291	3.75315	4.30061	3.67412	4.32474	3.78753
ID669	3.94335	4.27345	4.23898	3.97978	3.84516	4.00616	4.39616	3.42092	4.05611	4.36134	3.84097	4.39756	3.98031	4.40907	3.94951
ID670	3.86257	4.04474	4.34615	3.9328	3.83139	4.02938	4.40992	3.34728	4.05993	4.33703	3.96198	4.45593	4.06395	4.47333	3.87679
ID671	4.15398	4.29513	4.40869	3.93157	4.02031	4.1783	4.59757	3.5088	4.19246	4.56873	4.0626	4.57867	3.94853	4.57905	3.98324
ID672	3.94442	4.23497	4.21498	4.00009	3.65372	3.99371	4.40288	3.59445	3.95015	4.38115	3.82415	4.3316	3.99177	4.43232	3.92052
ID673	3.80961	4.27268	4.23507	3.80668	3.91363	4.10963	4.43107	3.64812	4.18155	4.45823	3.99634	4.43444	3.6565	4.5425	3.79665
ID674	3.88135	4.04162	4.28876	3.85387	3.85701	4.0666	4.40938	3.31522	4.11953	4.4909	3.95574	4.44581	3.93102	4.57862	3.80758
ID675	3.88578	4.17161	4.07686	3.89976	3.70532	3.91429	4.29348	3.5049	3.94989	4.24287	3.80545	4.24764	3.92398	4.19892	3.88174
ID676	3.9486	4.1932	4.2756	3.95518	3.77735	4.13563	4.43248	3.52977	4.05313	4.46465	3.92616	4.45018	3.8978	4.46742	4.05819
ID677	3.7212	4.142	4.05298	3.79733	3.63555	3.79318	4.25973	3.5821	3.71665	4.23013	3.57973	4.17677	3.74952	4.15652	3.71421
ID678	4.06946	4.35321	4.24353	3.59474	4.0738	3.96266	4.45363	3.79772	4.10525	4.52117	3.88039	4.53956	3.3476	4.61269	3.70131
ID679	3.99575	4.55966	4.19396	3.96728	3.83852	3.91815	4.40592	3.95252	4.12021	4.4181	3.94503	4.41441	3.94196	4.32594	3.92259
ID680	3.88977	4.33149	4.16606	3.74806	3.89161	3.89256	4.43009	3.74297	4.0227	4.42861	3.79693	4.38886	3.64826	4.46052	3.7768
ID681	3.77139	3.8671	4.02648	3.66038	3.65545	3.91244	4.34394	3.37396	3.74011	4.24493	3.75002	4.24164	3.40064	4.34083	3.83767
ID682	4.02529	4.28715	4.219	3.90983	3.71174	3.93891	4.46771	3.64462	4.02817	4.48527	3.75784	4.393	3.72792	4.39977	3.98336
ID683	3.93123	4.18326	4.29026	4.03661	3.80689	4.02633	4.45197	3.43515	3.98532	4.46426	3.88446	4.48731	4.04136	4.44033	3.90396
ID684	3.92201	4.1716	4.02192	3.89997	3.71377	3.95113	4.29995	3.48549	4.03552	4.39594	3.87303	4.28989	3.78777	4.43127	3.87593
ID685	4.03168	4.08798	4.26763	3.85618	3.69383	4.19241	4.40236	3.2943	4.15349	4.49192	4.02131	4.36212	3.66	4.38509	4.06397
ID686	3.98422	4.16203	4.2462	3.99448	3.82959	4.01104	4.42409	3.3807	3.99111	4.37003	3.84179	4.41201	3.97592	4.36502	3.95515
ID687	3.88049	4.14899	4.1645	3.91326	3.79005	3.96104	4.45893	3.50056	3.96003	4.43228	3.83486	4.35544	3.61944	4.46599	3.95067
ID688	3.98441	4.2982	4.12778	3.92951	3.7211	3.89483	4.41127	3.65867	4.03209	4.40272	3.81076	4.28149	3.72045	4.25332	3.95324
ID689	3.84734	4.21885	4.20098	3.92206	3.76112	3.98654	4.35191	3.66945	4.10752	4.35863	3.89128	4.29963	3.77747	4.38565	3.88466
ID690	3.94175	4.12616	4.29623	4.10722	3.90575	4.09451	4.4913	3.39352	4.10197	4.40638	3.95585	4.43123	4.14497	4.48975	4.00482
ID691	4.13337	4.42036	4.40261	3.78979	4.2652	4.25341	4.58823	3.63795	4.47341	4.58537	4.21848	4.66909	3.86909	4.66191	3.85224
ID692	3.71718	4.23445	4.05445	3.88031	3.66958	3.79945	4.37067	3.62821	3.95866	4.29355	3.72408	4.29135	3.60873	4.23848	3.75591
ID693	3.93859	4.26877	4.2251	3.97949	3.78984	3.9673	4.4587	3.6069	3.98099	4.37047	3.86504	4.3673	3.94309	4.31915	3.90075
ID694	3.80774	4.05854	4.07126	3.73035	3.74469	3.90268	4.37121	3.49178	3.96688	4.28962	3.84407	4.21642	3.46235	4.36962	3.91999
ID695	4.08451	4.47439	4.28389	3.98342	3.94942	3.98282	4.48899	3.84014	4.16289	4.50789	3.94739	4.47371	3.94214	4.42673	3.95281
ID696	3.87751	4.27309	4.3321	3.96597	3.84692	4.0915	4.50142	3.49783	4.19422	4.53422	4.00196	4.48411	3.89589	4.51547	4.0292
ID697	3.89681	4.19855	4.08087	3.80706	3.71767	3.88982	4.29956	3.55854	4.02273	4.31956	3.87848	4.25798	3.61639	4.27159	3.85832
ID698	3.89835	4.27059	4.21847	3.98672	3.72184	3.92897	4.4106	3.616	3.99501	4.32469	3.81568	4.34462	4.01207	4.4173	3.88083
ID699	4.00305	4.18763	4.21063	3.94108	3.75862	3.90176	4.40252	3.43964	3.91113	4.41157	3.7246	4.37145	3.85621	4.34102	3.98567
ID700	3.91222	4.09342	4.2391	3.88052	3.82851	4.02398	4.3622	3.38179	4.07926	4.29853	3.86567	4.3573	3.91704	4.3893	3.88137
ID701	3.71355	4.05192	4.1066	3.81926	3.7006	3.88283	4.31722	3.45021	3.78198	4.30164	3.69614	4.29876	3.63507	4.29788	3.7219
ID702	3.8135	4.15661	4.21959	3.83998	3.79536	4.0454	4.42326	3.50106	4.10438	4.39141	3.93061	4.37332	3.84083	4.46101	3.89632
ID703	4.1018	4.37402	4.30269	3.99093	3.97888	4.11443	4.50383	3.89437	4.16327	4.4634	3.96833	4.43589	4.0189	4.46967	4.02661
ID704	3.9537	4.5075	4.17958	3.94303	3.76652	3.91078	4.50828	3.9921	3.99236	4.46568	3.7007	4.41853	3.75441	4.48283	3.99761
ID705	3.90862	4.27958	4.17676	3.91753	3.72876	3.978	4.36254	3.59564	4.07441	4.40734	3.84014	4.31124	3.68569	4.33332	3.96042
ID706	3.94313	4.31395	4.08349	3.88931	3.74626	3.82664	4.39348	3.51827	4.00881	4.29982	3.80722	4.27247	3.86412	4.25315	3.87723
ID707	3.94543	4.40475	4.10651	3.81604	3.71278	3.85148	4.3878	3.79733	4.01307	4.37093	3.81642	4.34959	3.63348	4.30412	3.85866
ID708	3.82761	4.12973	4.18298	3.88437	3.7438	3.94139	4.43347	3.53739	3.96342	4.45639	3.82749	4.37367	3.76641	4.37413	3.91172
ID709	4.27257	4.42666	4.42957	NA	4.22208	4.03392	4.39235	3.936	4.16514	4.58928	4.06153	4.70463	3.56884	4.66404	3.55933
ID710	3.87235	4.19829	4.14771	3.93217	3.67232	3.86632	4.37572	3.45995	3.89526	4.34402	3.72952	4.31884	3.82625	4.28269	3.85769
ID711	3.95839	4.24885	4.27669	3.93676	3.72364	3.97567	4.38082	3.78388	3.96704	4.39273	3.83238	4.34417	4.00443	4.42167	3.89135
ID712	3.95903	4.21091	4.29243	3.9931	3.83529	3.99311	4.42434	3.51047	3.99712	4.3295	3.85045	4.38789	4.09993	4.40436	3.92082
ID713	3.82282	4.25297	4.06553	3.86526	3.74988	3.85329	4.3695	3.45474	4.03968	4.38381	3.82683	4.3024	3.67854	4.31698	3.89742
ID714	3.84751	4.31212	4.19768	3.85218	3.76242	3.97002	4.47382	4.09582	4.01434	4.37143	3.79303	4.31856	3.72774	4.40456	3.93367
ID715	4.00572	4.22002	4.28889	3.99944	3.90441	3.97503	4.48247	3.53439	4.01691	4.42114	3.88233	4.45485	4.0395	4.4648	3.91221
ID716	3.67376	4.12372	4.07934	3.67719	3.82086	4.03863	4.37364	3.71981	3.93432	4.32129	3.8705	4.30893	3.40987	4.34676	3.71179
ID717	3.89996	4.25946	4.06464	3.79829	3.69419	3.78716	4.3138	3.6688	3.94388	4.28663	3.73692	4.24761	3.65372	4.23851	3.88329
ID718	4.01262	4.37428	4.28737	4.04553	3.81746	3.97882	4.51275	3.71136	4.07111	4.48817	3.82543	4.46571	3.93713	4.4191	3.96029
ID719	3.95147	4.19594	4.12843	3.7987	3.79751	3.9663	4.4829	3.56923	3.94586	4.44281	3.77025	4.36949	3.36896	4.38785	3.92964
ID720	4.11841	4.50721	4.2911	3.99411	4.00664	3.99667	4.55192	3.82376	4.16618	4.52145	3.95346	4.50318	3.95703	4.46437	3.96712
ID721	3.74971	4.22823	4.04153	3.7532	3.8151	3.93015	4.38319	3.53843	4.088	4.31205	3.8804	4.20412	3.47978	4.33007	3.81046
ID722	4.11296	4.39387	4.4083	4.10478	3.93885	4.12504	4.56388	3.70127	4.20989	4.57298	3.9881	4.57238	4.1037	4.56086	4.02791
ID723	3.80208	3.9886	4.17763	3.74331	3.73759	4.03696	4.38226	3.32797	4.02878	4.35009	3.89638	4.44164	3.60278	4.42135	3.80837
ID724	3.86774	4.19478	4.2126	3.9127	3.71136	3.96245	4.4262	3.5377	4.08724	4.29562	3.95154	4.40033	3.67289	4.41611	3.94592
ID725	3.95352	4.59894	4.07513	3.87299	3.69174	3.70807	4.3551	4.21779	4.0663	4.29543	3.82081	4.24937	3.78891	4.19758	3.90712
ID726	4.05922	4.44563	4.18696	3.6122	4.05911	4.05438	4.36089	3.94075	4.26755	4.40535	4.01052	4.55938	3.61071	4.56229	3.68831
ID727	3.91737	4.12023	4.31126	3.88221	3.81811	4.12701	4.41603	3.55051	4.25428	4.38973	4.03473	4.42579	3.95886	4.47248	4.0083
ID728	4.05317	4.21059	4.40299	3.99297	3.93803	4.18241	4.51705	3.46406	4.20721	4.51168	4.04442	4.50922	3.96823	4.57963	4.05
ID729	3.90756	4.17799	4.13297	3.84902	3.78605	3.87183	4.37577	3.54565	3.92016	4.3059	3.77028	4.32072	3.73048	4.30471	3.84746
ID730	3.92216	4.20337	4.32139	3.99435	3.85834	4.11517	4.49422	3.51639	4.09854	4.45118	3.9536	4.42308	3.86014	4.49635	3.96993
ID731	3.91612	4.16813	4.20872	3.82278	3.77986	4.08227	4.42799	3.49215	4.14175	4.40287	3.93194	4.37549	3.72281	4.38081	3.98367
ID732	3.89832	4.1277	4.27954	3.96206	3.84691	4.01502	4.39351	3.34415	4.09957	4.31184	3.94658	4.39145	4.0185	4.38083	3.89037
ID733	3.92254	4.17807	4.17551	4.04183	3.7575	3.84224	4.4185	3.30827	3.95582	4.35368	3.84529	4.34592	4.01995	4.32826	3.93279
ID734	3.95571	4.29632	4.15441	3.97455	3.80028	3.81265	4.39169	3.56768	3.96374	4.35856	3.81162	4.31969	3.94225	4.25068	3.94005
ID735	3.92106	4.29474	4.12836	3.77011	3.88147	3.94686	4.36462	3.77972	4.15228	4.33923	3.97313	4.29069	3.68108	4.38138	3.84265

## Sheet: CARTaGENE_WholeBlood
	MTND6	MTRNR2	MTATP6	MTND4L	MTND3	MTCYB	MTCO1	MTRNR1	MTND1	MTND4	MTND2	MTCO2	MTATP8	MTCO3	MTND5
ID1	3.52774	4.38743	3.88618	3.56417	3.71643	3.74909	4.00831	4.03483	3.88984	3.94156	3.80434	3.96638	3.59817	3.92549	3.53894
ID2	3.65966	4.41725	4.03743	3.48842	3.80728	3.89236	4.1114	4.11828	3.93978	4.02873	3.85555	4.13471	3.60563	4.10455	3.51261
ID3	3.51054	4.09263	3.79385	3.46436	3.55626	3.7026	3.97927	3.73968	3.75327	3.82505	3.67627	3.83536	3.41405	3.83331	3.52173
ID4	3.72723	4.5716	4.08503	3.62341	3.88081	3.93142	4.15486	4.20567	4.08595	4.0937	3.96902	4.15056	3.67092	4.12304	3.64644
ID5	3.52142	4.3038	3.79281	3.44369	3.59184	3.67973	3.97517	3.93893	3.7269	3.83248	3.6483	3.86746	3.40549	3.83199	3.51224
ID6	3.55559	4.25721	3.84747	3.44453	3.60292	3.67764	3.98205	3.85867	3.75526	3.84304	3.66916	3.85942	3.5172	3.88552	3.49835
ID7	3.55999	4.0945	3.84715	3.39534	3.54653	3.67801	4.01181	3.70384	3.67244	3.87728	3.65223	3.87455	3.46413	3.81246	3.40031
ID8	3.56205	4.31173	3.87661	3.45958	3.65276	3.76825	4.07448	3.87878	3.79209	3.90467	3.66121	3.87619	3.51827	3.93394	3.49474
ID9	3.50556	4.36659	3.85551	3.58678	3.64504	3.75631	4.03436	3.95927	3.78637	3.96074	3.7408	3.96702	3.46247	3.93373	3.53218
ID10	3.55781	4.30077	3.87072	3.48066	3.58463	3.70218	3.95799	3.91612	3.80466	3.91462	3.76047	3.89669	3.41124	3.89216	3.55462
ID11	3.55682	4.27612	3.87245	3.6175	3.71082	3.74735	3.97361	3.89267	3.77789	3.96064	3.74025	3.96417	3.63752	3.94842	3.56392
ID12	3.61379	4.43462	3.97118	3.38157	3.7726	3.79	4.00221	3.99184	3.85246	3.94746	3.80486	4.02341	3.46506	3.98006	3.43285
ID13	3.60367	4.39038	3.95632	3.44786	3.74007	3.78045	3.95684	4.00933	3.87926	3.98378	3.8258	4.02326	3.44509	3.90603	3.45354
ID14	3.60627	4.07882	3.87653	3.2929	3.68091	3.72585	4.0065	3.6256	3.80148	3.85355	3.70945	3.96216	3.47832	3.99719	3.396
ID15	3.46603	4.09858	3.77914	3.3614	3.67041	3.60304	3.90279	3.69957	3.61861	3.80113	3.63085	3.81592	3.44567	3.83912	3.39036
ID16	3.54637	4.2511	3.69972	3.50944	3.62426	3.66359	3.89103	3.83746	3.66493	3.89448	3.63909	3.91059	3.54432	3.85784	3.43931
ID17	3.5175	4.26341	3.86415	3.50458	3.70631	3.74575	3.98929	3.87225	3.79628	3.92035	3.73411	3.93652	3.49755	3.91469	3.50822
ID18	3.41345	3.97565	3.66508	3.35882	3.39698	3.47865	3.87147	3.6053	3.5757	3.74032	3.46953	3.82484	3.3549	3.72413	3.39241
ID19	3.57144	4.21717	3.84572	3.41534	3.60442	3.72331	3.97617	3.92129	3.73768	3.8818	3.68328	3.87042	3.4152	3.88421	3.52327
ID20	3.57197	4.18735	3.56327	3.4189	3.53835	3.61428	3.87566	3.88026	3.60045	3.90606	3.59355	3.76799	3.39558	3.84075	3.42244
ID21	3.56184	4.36819	3.87373	3.50837	3.66012	3.71838	4.01499	3.94717	3.83839	3.92326	3.7402	3.95732	3.47512	3.84554	3.52507
ID22	3.62779	4.27232	3.90129	3.46064	3.6612	3.77195	3.96399	3.8228	3.74455	3.90877	3.74104	3.94122	3.55353	3.86165	3.54221
ID23	3.48023	4.42383	3.85462	3.34799	3.60497	3.67089	3.85538	4.0681	3.81161	3.92286	3.74114	3.88175	3.36763	3.86481	3.38952
ID24	3.57449	4.39081	3.89421	3.34577	3.66928	3.74647	3.9156	3.94329	3.81792	3.91673	3.75598	3.99363	3.41628	3.88148	3.39973
ID25	3.67476	4.30834	3.89782	3.54957	3.71102	3.77786	4.09721	3.97635	3.88723	3.93628	3.77997	3.96008	3.58807	3.92633	3.66168
ID26	3.53287	4.04008	3.79029	3.40116	3.65626	3.63367	3.95445	3.63937	3.77441	3.80135	3.68786	3.7855	3.44304	3.79099	3.45117
ID27	3.56493	4.40495	3.94618	3.61822	3.71724	3.79699	4.06819	4.03317	3.83746	4.00785	3.77963	4.02954	3.55999	3.99501	3.54338
ID28	3.44502	4.35197	3.82431	3.53765	3.73562	3.66946	3.99034	3.99064	3.81336	3.89725	3.77616	3.93636	3.47779	3.89026	3.44044
ID29	3.67411	4.18107	3.92095	3.49983	3.79803	3.77843	4.01505	3.76718	3.85837	3.9853	3.77847	3.96656	3.64416	3.89202	3.54885
ID30	3.66466	4.2195	3.96191	3.51505	3.62847	3.7955	4.0665	3.87787	3.85747	3.98282	3.74596	4.00283	3.55249	3.93862	3.63685
ID31	3.55486	4.19813	3.84839	3.55808	3.69174	3.66137	4.05415	3.82706	3.74103	3.91077	3.6891	3.99452	3.54471	3.89555	3.5429
ID32	3.5363	4.2664	3.88477	3.39035	3.64246	3.7413	3.96271	3.90457	3.83101	3.92658	3.7394	3.94228	3.44653	3.8942	3.45523
ID33	3.33102	4.33273	3.80491	3.48352	3.62112	3.58558	4.01295	3.96515	3.71887	3.83835	3.73716	3.90943	3.40539	3.90448	3.37943
ID34	3.71368	4.44585	3.98978	3.54241	3.76704	3.87893	4.13169	4.07794	3.92504	4.00365	3.84463	4.05488	3.69852	4.05039	3.60682
ID35	3.55073	4.28066	3.89728	3.52224	3.70921	3.64691	4.03503	3.96175	3.82409	3.92305	3.71996	4.03737	3.55825	3.94605	3.52159
ID36	3.63551	4.18558	3.89083	3.50371	3.65973	3.75174	3.94161	3.78001	3.82873	3.92076	3.74424	3.88543	3.50683	3.87919	3.6156
ID37	3.52209	4.20474	3.90602	3.62899	3.62777	3.8225	4.10099	3.79772	3.83115	3.95314	3.75382	3.97107	3.57651	4.01496	3.58299
ID38	3.38297	4.10237	3.80888	3.32522	3.67541	3.58816	3.91027	3.70887	3.69997	3.81099	3.66526	3.90325	3.38426	3.87273	3.28498
ID39	3.42568	4.14612	3.82866	3.47716	3.6824	3.63535	4.00235	3.81273	3.71947	3.86329	3.68977	3.91752	3.45635	3.91235	3.44503
ID40	3.54957	4.37243	3.89644	3.52872	3.66968	3.77816	4.01613	4.00687	3.83413	3.93385	3.7619	3.96068	3.5163	3.94376	3.52002
ID41	3.38323	4.00558	3.74262	3.42897	3.52805	3.6182	3.85654	3.61011	3.6534	3.80365	3.5789	3.83595	3.36505	3.75577	3.42594
ID42	3.41369	4.13812	3.72393	3.39146	3.51411	3.5851	3.92106	3.70994	3.64717	3.78615	3.58663	3.81099	3.39807	3.83929	3.3921
ID43	3.68948	4.40278	3.98091	3.60128	3.73123	3.87177	4.11322	3.9686	3.93842	4.01684	3.83541	4.03912	3.63515	3.99761	3.64008
ID44	3.56403	4.2987	3.92591	3.48297	3.68039	3.82752	4.04976	3.92705	3.84854	3.97361	3.72919	3.9977	3.49349	3.97804	3.48594
ID45	3.57738	4.27653	3.8605	3.3287	3.69412	3.71733	3.96459	3.84339	3.72969	3.86914	3.65003	3.95163	3.4147	3.88588	3.36555
ID46	3.58974	4.24234	3.9031	3.4998	3.75467	3.74764	4.12101	3.90708	3.84519	3.94848	3.81872	4.04689	3.49626	3.9599	3.53531
ID47	3.61251	4.38382	3.9368	3.35586	3.78545	3.76064	3.95272	3.99751	3.90711	3.979	3.80932	4.03239	3.41425	3.94036	3.40384
ID48	3.64596	4.26063	3.82417	3.42853	3.631	3.65771	3.96577	3.8725	3.77061	3.88796	3.71835	3.89483	3.41985	3.81506	3.53906
ID49	3.49909	4.13494	3.80329	3.458	3.57489	3.72348	3.95616	3.73233	3.76024	3.83486	3.67105	3.80798	3.42627	3.87074	3.49208
ID50	3.63944	4.4463	3.9577	3.44614	3.73949	3.8095	4.07492	4.07503	3.85965	3.95751	3.7403	4.01869	3.5176	3.98699	3.5263
ID51	3.65251	4.38535	4.0232	3.65274	3.76705	3.89475	4.16094	4.01672	3.8866	4.05043	3.81337	4.06795	3.65898	4.03708	3.61191
ID52	3.61062	4.22006	3.88487	3.47552	3.60622	3.73272	4.00522	3.88072	3.85117	3.90056	3.73045	3.91773	3.54725	3.90415	3.56227
ID53	3.58627	4.32742	3.90936	3.48853	3.62721	3.74531	4.0153	3.91939	3.92424	3.89894	3.7964	3.86816	3.55955	3.90742	3.59787
ID54	3.58786	4.18394	3.84952	3.43303	3.63174	3.72078	4.01403	3.79973	3.75157	3.85936	3.67898	3.90807	3.47918	3.86578	3.53164
ID55	3.51308	4.23726	3.86772	3.45576	3.66391	3.69373	3.98751	3.82572	3.78991	3.88969	3.74243	3.92511	3.53702	3.87623	3.50696
ID56	3.65277	4.32308	3.89837	3.51918	3.72008	3.80085	4.07248	3.93394	3.85413	3.93895	3.7563	3.99938	3.54838	3.97818	3.58246
ID57	3.46568	4.23858	3.78046	3.43607	3.58428	3.64776	3.9598	3.95089	3.69059	3.82074	3.62324	3.85602	3.46634	3.85114	3.50325
ID58	3.52334	4.19253	3.84627	3.43345	3.60969	3.70352	4.00339	3.78142	3.6926	3.84215	3.66094	3.83799	3.48811	3.90732	3.49269
ID59	3.70012	4.43297	4.00567	3.51014	3.79013	3.83557	4.06852	4.06442	3.89998	3.9928	3.77265	4.05151	3.60243	4.0013	3.56715
ID60	3.48275	4.30461	3.82079	3.36188	3.52816	3.6696	3.99898	3.90824	3.80222	3.82392	3.6805	3.84782	3.42309	3.88268	3.44103
ID61	3.4541	4.03469	3.74201	3.42553	3.44366	3.59777	3.93393	3.58459	3.66021	3.80168	3.54486	3.81726	3.36876	3.81104	3.44706
ID62	3.57986	4.45551	3.96925	3.57634	3.69453	3.82478	4.05204	4.11249	4.00928	4.02923	3.86308	4.01318	3.49775	3.95366	3.6223
ID63	3.53	4.0568	3.79316	3.44846	3.56941	3.68649	3.98752	3.64117	3.7802	3.84778	3.58875	3.87694	3.48492	3.87129	3.48662
ID64	3.55351	4.28091	3.88457	3.50217	3.65383	3.72236	4.0311	3.96485	3.83005	3.90075	3.7202	3.92926	3.53712	3.89436	3.54191
ID65	3.38899	4.16619	3.7124	3.35354	3.50813	3.56888	3.90118	3.80751	3.71585	3.78358	3.57544	3.79129	3.35029	3.7938	3.32058
ID66	3.60924	4.06498	3.84487	3.42678	3.63029	3.67265	4.02596	3.71234	3.70647	3.88554	3.6437	3.93829	3.51882	3.90817	3.55943
ID67	3.55897	4.24933	3.80529	3.51358	3.6408	3.69712	3.95014	3.74154	3.72983	3.88002	3.6417	3.86828	3.46331	3.86955	3.5337
ID68	3.47583	4.14605	3.88742	3.56014	3.7604	3.67726	4.02877	3.66352	3.65203	3.89446	3.69339	3.97138	3.5714	3.88604	3.48493
ID69	3.72966	4.4037	3.94899	3.41952	3.73793	3.8092	4.0529	4.04511	3.93748	3.93115	3.85989	3.91901	3.64797	3.90713	3.57265
ID70	3.51357	4.27475	3.85668	3.42031	3.59994	3.69428	3.99581	3.81937	3.74198	3.86715	3.67159	3.90239	3.51626	3.91482	3.44205
ID71	3.64423	4.31549	3.86837	3.50078	3.72569	3.75887	4.02019	3.85835	3.93351	3.92242	3.82861	3.90837	3.49933	3.85128	3.58282
ID72	3.42209	4.15392	3.83435	3.47442	3.70038	3.65934	4.00795	3.85436	3.72699	3.8826	3.70694	3.92957	3.46439	3.93591	3.41338
ID73	3.56795	4.35013	3.89709	3.49046	3.63036	3.76106	3.99348	4.01903	3.84266	3.92432	3.72759	3.96936	3.46021	3.86596	3.58491
ID74	3.43057	4.10693	3.776	3.46689	3.5961	3.60183	3.9288	3.72949	3.69007	3.8266	3.60291	3.87707	3.41735	3.78343	3.41532
ID75	3.49541	4.23493	3.83996	3.45003	3.71846	3.70947	3.94871	3.84377	3.74766	3.86319	3.72976	3.91661	3.5019	3.88175	3.40038
ID76	3.54161	4.29614	3.8487	3.51427	3.62975	3.62214	3.98837	3.92615	3.84148	3.8858	3.70517	3.91546	3.52559	3.88932	3.50461
ID77	3.67463	4.49977	3.90293	3.38149	3.75108	3.78951	4.02848	4.08529	3.8941	3.95435	3.84878	4.01549	3.45719	3.89248	3.50817
ID78	3.70975	4.29465	3.9626	3.47211	3.73616	3.84345	4.10823	3.9411	3.916	4.0058	3.82019	4.03928	3.577	4.03624	3.58156
ID79	3.61992	4.20912	3.88052	3.46114	3.65659	3.71739	4.04643	3.82566	3.71557	3.88269	3.67684	3.94495	3.50938	3.91366	3.57392
ID80	3.58625	4.34615	3.86744	3.52222	3.71976	3.79231	4.006	3.92653	3.87614	3.93042	3.81185	3.9808	3.56682	3.98735	3.5162
ID81	3.55462	4.32552	3.92061	3.49125	3.66417	3.75506	4.01475	3.94761	3.85711	3.93067	3.69375	3.95448	3.60166	3.9575	3.54918
ID82	3.47207	4.17751	3.83173	3.47897	3.62026	3.66876	3.93305	3.81225	3.79393	3.90105	3.7115	3.8705	3.49729	3.79416	3.46826
ID83	3.60929	4.37413	4.00212	3.58242	3.74811	3.81745	4.03546	3.99173	3.86976	4.01452	3.7934	4.00652	3.60359	3.95222	3.5695
ID84	3.52367	4.14386	3.79834	3.41788	3.58017	3.66876	3.93326	3.72387	3.74221	3.81279	3.6274	3.83199	3.48503	3.77459	3.49719
ID85	3.59038	4.46272	3.96513	3.56192	3.76498	3.7889	4.06793	4.13128	3.97484	4.00908	3.84162	4.03479	3.55686	3.96368	3.5991
ID86	3.62901	4.15856	3.77291	3.38672	3.478	3.61787	3.95896	3.76969	3.65728	3.82441	3.56341	3.81348	3.50694	3.80431	3.50337
ID87	3.44822	4.01851	3.64818	3.29233	3.34746	3.49634	3.78279	3.61606	3.44888	3.72643	3.43209	3.74785	3.32327	NA	3.39799
ID88	3.53327	4.2519	3.79053	3.42096	3.60412	3.6934	3.96002	3.90741	3.84293	3.84103	3.75365	3.85603	3.44233	3.82307	3.49771
ID89	3.46335	4.1001	3.68001	3.34422	3.41759	3.5365	3.86912	3.64358	3.55566	3.72036	3.42055	3.75181	3.36974	3.75203	3.40814
ID90	3.47138	4.16336	3.76086	3.50984	3.54279	3.67059	3.98268	3.77221	3.68913	3.83634	3.62836	3.8299	3.43049	3.86556	3.5247
ID91	3.49632	4.36591	3.87332	3.47688	3.62282	3.70762	3.93259	3.98635	3.8384	3.91415	3.73236	3.93474	3.46488	3.90867	3.47642
ID92	3.79408	4.53285	4.08549	3.60952	3.83046	3.9289	4.16884	4.17886	4.03779	4.12046	3.90315	4.15366	3.68883	4.12573	3.66001
ID93	3.4896	4.41197	3.85356	3.4579	3.6752	3.69872	4.00134	4.0454	3.83317	3.87842	3.73962	3.95149	3.44728	3.87031	3.45799
ID94	3.4357	4.17915	3.71766	3.45113	3.4505	3.54147	3.94875	3.84172	3.69374	3.77638	3.57362	3.84904	3.43448	3.82797	3.47508
ID95	3.52803	4.15831	3.85486	3.44995	3.57458	3.70447	3.98886	3.81056	3.74731	3.87845	3.58523	3.93964	3.51707	3.94477	3.48937
ID96	3.61398	4.42453	3.91775	3.44166	3.70856	3.74627	4.05558	4.05717	3.86084	3.95242	3.8659	4.01597	3.50786	3.9597	3.48128
ID97	3.52016	4.26688	3.81137	3.35775	3.59164	3.65214	3.8737	3.85793	3.65025	3.84811	3.59661	3.89051	3.34538	3.69252	3.42477
ID98	3.55362	4.06521	3.79945	3.42425	3.64016	3.64787	3.97147	3.67954	3.70728	3.82545	3.6345	3.8544	3.48443	3.84323	3.48311
ID99	3.4495	4.1786	3.81791	3.38286	3.55217	3.72107	3.8558	3.84967	3.62919	3.79103	3.61717	3.87842	3.46001	3.76751	3.39708
ID100	3.53461	4.29549	3.82766	3.41478	3.63809	3.6666	3.95365	3.87493	3.80361	3.85819	3.69385	3.90261	3.4218	3.85628	3.42668
ID101	3.50993	4.14204	3.83376	3.47917	3.56216	3.66548	3.99254	3.72964	3.75559	3.89277	3.65235	3.92449	3.4737	3.89064	3.48696
ID102	3.57714	4.36962	3.92524	3.50048	3.62176	3.74644	4.1202	4.00868	3.86784	3.94369	3.74781	4.02807	3.58725	4.02088	3.53327
ID103	3.64661	4.32121	4.00006	3.64995	3.83895	3.86192	4.14896	3.95011	3.92341	4.0451	3.83173	4.07255	3.71939	4.00384	3.62814
ID104	3.59721	4.31468	3.94049	3.50103	3.68005	3.7716	4.0327	3.90526	3.91873	3.96855	3.92791	3.974	3.52957	3.9566	3.55594
ID105	3.37066	4.18166	3.79857	3.39198	3.60501	3.58239	3.95951	3.87257	3.7019	3.82174	3.60863	3.86798	3.39823	3.82163	3.37609
ID106	3.52977	4.42198	3.85843	3.49138	3.72491	3.66529	4.05909	4.10687	3.88477	3.93097	3.73785	3.98536	3.44947	3.9374	3.52928
ID107	3.48962	4.10186	3.75779	3.43239	3.50417	3.63102	3.94031	3.70073	3.73309	3.83681	3.62258	3.81053	3.39459	3.76898	3.47894
ID108	3.52239	4.36214	3.90367	3.54838	3.64889	3.74386	4.02674	4.00532	3.92889	3.94162	3.81067	3.9611	3.63123	3.91318	3.54882
ID109	3.71549	4.3468	4.02062	3.59361	3.78039	3.86343	4.16376	3.89232	3.89146	4.06994	3.80968	4.11657	3.64923	4.07846	3.62172
ID110	3.36338	4.19088	3.8284	3.44664	3.56838	3.67037	3.96091	3.81137	3.63662	3.85662	3.66471	3.91844	3.45598	3.88744	3.38088
ID111	3.52077	4.41817	3.82408	3.41311	3.59971	3.72023	3.99902	4.09207	3.83109	3.87399	3.71799	3.90947	3.37553	3.84941	3.4844
ID112	3.74105	4.46742	4.03995	3.67666	3.88838	3.89424	4.17586	4.09531	4.05475	4.06062	3.97603	4.08543	3.62322	4.02697	3.73038
ID113	3.66232	4.22513	3.91205	3.5411	3.75729	3.82965	4.03128	3.82586	3.83291	3.9714	3.81092	3.98181	3.56937	3.95843	3.58008
ID114	3.63368	4.23348	3.89876	3.42938	3.61772	3.79584	4.07665	3.86612	3.79167	3.92356	3.76765	3.97406	3.52967	3.96705	3.50038
ID115	3.54073	4.34222	3.89087	3.45266	3.60996	3.69921	4.03854	3.9856	3.8722	3.90561	3.73096	3.97722	3.53805	3.98038	3.49395
ID116	3.46966	4.09405	3.68967	3.39514	3.41662	3.5441	3.90012	3.6887	3.5959	3.75511	3.52581	3.77755	3.33715	3.76428	3.42225
ID117	3.53986	4.4131	3.85762	3.31888	3.61927	3.68971	3.95961	4.09222	3.7751	3.88239	3.71603	3.92708	3.35153	3.92975	3.35112
ID118	3.298	4.08483	3.70077	3.34703	3.50047	3.501	3.84372	3.77668	3.67411	3.73195	3.57463	3.79173	3.33213	3.74191	3.32728
ID119	3.52042	4.05862	3.87442	3.47751	3.61563	3.75279	4.00778	3.65356	3.67781	3.89081	3.65032	3.89273	3.54768	3.93788	3.49289
ID120	3.33419	4.20943	3.74537	3.41481	3.5398	3.5768	3.98226	3.82535	3.65252	3.7789	3.62169	3.80913	3.36341	3.82191	3.34472
ID121	3.44218	4.12121	3.78163	3.4505	3.70059	3.65539	3.91968	3.715	3.72117	3.82342	3.63859	3.84112	3.46348	3.83792	3.41673
ID122	3.68764	4.31556	3.97643	3.45095	3.75114	3.81412	4.02654	3.88749	3.83023	3.99175	3.7832	4.02223	3.55974	4.00678	3.50933
ID123	3.67055	4.42286	3.98517	3.53857	3.7386	3.84321	4.08567	4.01558	3.98802	4.01085	3.8539	3.99655	3.59048	3.99756	3.61316
ID124	3.5824	4.3581	3.84978	3.46559	3.64119	3.68813	4.03171	3.94856	3.79978	3.87286	3.65837	3.90959	3.52713	3.86894	3.53283
ID125	3.64208	4.36591	3.92679	3.50269	3.72662	3.75925	4.0484	3.99587	3.87417	3.95172	3.77309	3.99802	3.51566	3.96559	3.54455
ID126	3.46985	4.21408	3.76918	3.40961	3.53925	3.64268	3.89541	3.78009	3.72241	3.80761	3.65449	3.77147	3.40959	3.8183	3.47081
ID127	3.48362	4.15152	3.75977	3.47471	3.5833	3.58913	3.99299	3.79965	3.63567	3.81428	3.51255	3.90221	3.56298	3.87235	3.49629
ID128	3.54649	4.39913	3.89382	3.46876	3.62342	3.79038	4.05491	4.0032	3.85588	3.93974	3.7824	3.94623	3.47153	3.97962	3.49204
ID129	3.42397	4.18567	3.81109	3.4382	3.64021	3.64069	3.97464	3.81084	3.74821	3.84261	3.7046	3.8657	3.43431	3.87893	3.43464
ID130	3.55935	4.10931	3.65459	3.52086	3.53777	3.67656	3.914	3.62389	3.7267	3.88749	3.71388	3.87794	3.49058	3.86713	3.49422
ID131	3.54125	4.2722	3.85723	3.48731	3.64769	3.68461	4.04579	3.86816	3.74954	3.88886	3.64226	3.9383	3.51809	3.88031	3.5119
ID132	3.48815	4.17392	3.73741	3.31233	3.54306	3.59045	3.85114	3.77524	3.74151	3.76572	3.65817	3.81248	3.36164	3.72856	3.38485
ID133	3.58774	4.16753	3.90983	3.4049	3.69024	3.75355	3.96123	3.80882	3.77839	3.93527	3.72368	3.9463	3.50249	3.9274	3.41619
ID134	3.47145	4.23413	3.7962	3.44321	3.62496	3.66143	3.91954	3.88619	3.76808	3.87152	3.66762	3.86743	3.40639	3.83748	3.44826
ID135	3.66024	4.5137	4.04974	3.56636	3.78166	3.81754	4.12263	4.17874	4.08916	4.08056	3.9749	4.14574	3.63707	4.05892	3.5896
ID136	3.58647	4.14088	3.86233	3.49672	3.65157	3.76054	3.99035	3.81257	3.74202	3.91254	3.6806	3.90878	3.47098	3.90092	3.57165
ID137	3.64662	4.09876	3.92707	3.53793	3.67871	3.78467	4.03176	3.71877	3.7722	3.95271	3.72408	3.9377	3.59631	3.92766	3.55716
ID138	3.54892	4.06747	3.84067	3.41927	3.56003	3.72002	3.95106	3.63865	3.76892	3.80877	3.66854	3.82251	3.45903	3.84935	3.52962
ID139	3.47799	4.23297	3.86699	3.49287	3.70652	3.62961	4.02937	3.86192	3.72514	3.88659	3.70376	3.94831	3.53458	3.92164	3.45327
ID140	3.58087	4.49924	3.93914	3.5346	3.75842	3.83259	4.06353	4.11353	3.92938	3.97656	3.83367	4.0038	3.64076	4.02543	3.52524
ID141	3.38953	4.1951	3.70939	3.31188	3.49371	3.56488	3.85712	3.77083	3.632	3.75285	3.51351	3.75949	3.34028	3.79601	3.39699
ID142	3.51982	4.19091	3.78119	3.33495	3.60001	3.62539	3.96585	3.71405	3.70529	3.80989	3.60183	3.89459	3.42935	3.80441	3.40316
ID143	3.82411	4.36977	3.97146	3.58108	3.72402	3.89013	4.13876	4.07474	3.94975	4.05554	3.89364	4.02102	3.65116	4.01355	3.79283
ID144	3.53858	4.1996	3.87912	3.48843	3.56805	3.74246	3.99357	3.88147	3.79232	3.91203	3.71306	3.91127	3.56039	3.96888	3.51906
ID145	3.50367	4.27398	3.80897	3.3321	3.70804	3.65888	3.86678	3.8766	3.80187	3.83035	3.72253	3.89636	3.4014	3.84692	3.29905
ID146	3.60438	4.2828	3.86169	3.46858	3.59524	3.72317	3.96185	3.9029	3.81233	3.8918	3.72403	3.89926	3.4958	3.8901	3.58714
ID147	3.50261	4.48273	3.93457	3.4403	3.75442	3.76538	4.02102	4.09178	3.89246	3.93182	3.82161	4.04374	3.49304	4.00729	3.38845
ID148	3.52141	4.15384	4.00037	3.47119	3.71199	3.74158	4.12134	3.84331	3.80895	3.91394	3.79105	3.98665	3.4968	3.99653	3.49175
ID149	3.6008	4.52271	3.80271	3.62109	3.75552	3.8558	4.00942	4.11663	3.923	3.97985	3.83321	3.97615	3.6211	4.03301	3.62558
ID150	3.64699	4.43971	3.99706	3.43181	3.75419	3.83076	4.09082	4.09243	3.92275	4.01898	3.83766	4.02052	3.48313	4.03191	3.45886
ID151	3.55724	4.02333	3.75779	3.37475	3.50216	3.61142	3.9172	3.63772	3.64286	3.7803	3.48879	3.77844	3.44745	3.77005	3.50252
ID152	3.57917	4.15238	3.79895	3.41206	3.49025	3.6361	3.93085	3.84809	3.69262	3.83805	3.64722	3.81979	3.49683	3.83343	3.5045
ID153	3.42727	4.37434	3.84996	3.46085	3.61179	3.68918	3.92743	3.98468	3.79587	3.88568	3.70405	3.94914	3.42569	3.8888	3.44451
ID154	3.416	4.2059	3.82755	3.4381	3.65691	3.589	4.00442	3.74274	3.67938	3.8214	3.57947	3.90205	3.4777	3.87707	3.42232
ID155	3.58332	4.36133	3.91839	3.48984	3.72991	3.75119	3.9932	3.95709	3.88353	3.95018	3.77362	3.97514	3.50918	3.8804	3.50751
ID156	3.63329	4.44634	3.94919	3.55149	3.70422	3.79339	4.08579	4.12542	3.92964	4.00101	3.8065	4.03166	3.5007	3.91373	3.64956
ID157	3.54614	4.07383	3.53472	3.461	3.43648	3.54773	3.90056	3.70274	3.53726	3.79807	3.51525	3.79228	3.35238	3.75952	3.56528
ID158	3.58625	4.21976	3.92293	3.47309	3.67593	3.76888	4.04933	3.84692	3.82984	3.91809	3.79566	3.95387	3.46941	3.99377	3.5419
ID159	3.50653	4.05291	3.63427	3.47039	3.53665	3.6622	3.90645	3.5697	3.51541	3.86255	3.58649	3.82861	3.53092	3.85603	3.40418
ID160	3.50152	4.33833	3.82349	3.44711	3.61315	3.71056	3.95206	3.87381	3.79631	3.88512	3.71687	3.91562	3.40392	3.85756	3.43574
ID161	3.47457	4.17005	3.7839	3.34398	3.53632	3.68435	3.98501	3.83554	3.72615	3.78999	3.62942	3.85345	3.46485	3.94635	3.43823
ID162	3.67974	4.39787	4.02191	3.55488	3.82206	3.85674	4.05176	3.9759	3.91542	4.06019	3.87634	4.08189	3.49591	4.00244	3.50676
ID163	3.53954	4.20849	3.87036	3.51009	3.71239	3.62841	4.0402	3.87074	3.81124	3.90186	3.75243	3.94868	3.4844	3.85111	3.50502
ID164	3.66546	4.15581	3.85697	3.35945	3.65425	3.71697	4.02009	3.79493	3.81174	3.87209	3.66416	3.93871	3.44479	3.88499	3.54098
ID165	3.57063	4.32371	3.8908	3.58535	3.71393	3.75598	4.07294	3.89203	3.77711	3.93417	3.72742	3.99775	3.55636	3.90622	3.54735
ID166	3.63736	4.31345	3.98271	3.59655	3.7959	3.79943	4.08981	3.98474	3.84199	4.00759	3.7502	4.01672	3.64619	3.9823	3.59021
ID167	3.51044	4.01605	3.63655	3.49316	3.50035	3.66796	3.82347	3.63856	3.49503	3.84071	3.49991	3.86904	3.41981	3.70481	3.50565
ID168	3.68855	4.46828	3.98859	3.59298	3.70794	3.80211	4.07344	4.02972	3.89714	4.0085	3.82495	4.01493	3.61428	3.93562	3.64493
ID169	3.5728	4.4363	3.9352	3.41597	3.71494	3.77057	4.04242	4.03193	3.9902	3.91154	3.81908	3.95537	3.47012	3.98093	3.4924
ID170	3.61296	4.47987	3.97782	3.57865	3.74996	3.79867	4.05834	4.12793	3.90251	4.00298	3.85381	4.0082	3.61135	3.99102	3.60185
ID171	3.45117	4.44997	3.85456	3.49147	3.69463	3.72102	3.97335	4.04074	3.84036	3.89646	3.74348	3.93048	3.51318	3.90503	3.44128
ID172	3.4651	4.1732	3.77704	3.36377	3.50731	3.68387	3.89468	3.74244	3.70622	3.80155	3.59724	3.80635	3.38839	3.80949	3.45011
ID173	3.41906	4.18573	3.79637	3.42091	3.59032	3.59303	4.00345	3.84492	3.74298	3.81822	3.66025	3.95412	3.39845	3.8375	3.41901
ID174	3.57028	4.3035	3.84922	3.42252	3.68358	3.73948	3.99044	3.92059	3.81264	3.87721	3.72753	3.92181	3.47349	3.88233	3.47925
ID175	3.46632	4.19261	3.72496	3.40102	3.48376	3.61288	3.87527	3.75024	3.66962	3.7911	3.63317	3.78244	3.39791	3.78226	3.42443
ID176	3.55708	4.28883	3.81911	3.34617	3.59218	3.69538	3.92049	3.89793	3.72055	3.85542	3.64798	3.88667	3.36745	3.86468	3.41687
ID177	3.53061	4.26996	3.84522	3.53218	3.67224	3.72416	3.95622	3.91537	3.80322	3.86885	3.71168	3.87145	3.5377	3.92429	3.51993
ID178	3.43779	4.21168	3.69196	3.35955	3.48778	3.56461	3.88527	3.81433	3.70894	3.7289	3.64074	3.76213	3.31648	3.72018	3.4646
ID179	3.58922	4.30666	3.86796	3.33623	3.6586	3.6905	4.01277	3.97129	3.76386	3.89088	3.66841	3.97157	3.39994	3.91158	3.40085
ID180	3.6962	4.47923	3.99634	3.49878	3.73838	3.88351	4.09453	4.12092	3.84112	4.03542	3.76701	4.07181	3.53939	3.98584	3.55058
ID181	3.5504	4.43838	3.91786	3.49715	3.65348	3.77469	4.03531	4.04371	3.90372	3.93171	3.82619	3.93415	3.45689	3.95857	3.57818
ID182	3.51032	4.2234	3.84431	3.49843	3.54199	3.67911	3.93947	3.75417	3.73051	3.90622	3.62069	3.93775	3.48825	3.92717	3.4476
ID183	3.59752	4.19565	3.76324	3.44107	3.5691	3.69985	3.97568	3.87269	3.65701	3.85897	3.59235	3.78178	3.4387	3.83709	3.5501
ID184	3.60588	4.30793	3.82115	3.4546	3.54371	3.67843	3.99953	3.82781	3.79579	3.9105	3.73054	3.90844	3.45662	3.8388	3.55301
ID185	3.8206	4.4379	3.97766	3.63558	3.69772	3.8756	4.20708	4.06407	3.98376	4.0598	3.85925	4.09696	3.62632	4.0371	3.76786
ID186	3.61238	4.44297	3.95814	3.56767	3.67417	3.78501	4.07899	4.10023	3.96477	4.00023	3.84695	3.97876	3.57081	3.91934	3.61855
ID187	3.48511	4.18023	3.79892	3.42269	3.63357	3.65928	3.90256	3.8729	3.74578	3.83874	3.66175	3.87787	3.42003	3.84694	3.40601
ID188	3.50401	4.32388	3.80751	3.35324	3.62123	3.648	3.95172	3.90026	3.75232	3.84685	3.57291	3.91965	3.40201	3.86958	3.43667
ID189	3.63143	4.44252	3.94757	3.57056	3.71402	3.77801	4.08156	4.1271	3.97649	3.9966	3.78458	4.07462	3.56634	3.95432	3.62074
ID190	3.51471	4.28116	3.83285	3.5742	3.62276	3.72628	4.0557	3.85586	3.78649	3.91244	3.72783	3.92832	3.45512	3.89723	3.57148
ID191	3.56163	4.33791	3.95233	3.56912	3.77562	3.76813	4.04328	3.96749	3.87371	3.96108	3.80484	3.97577	3.57216	3.96231	3.55129
ID192	3.48466	4.24463	3.85504	3.40067	3.56869	3.65617	3.98238	3.85973	3.789	3.88537	3.67056	3.95446	3.43957	3.83851	3.40702
ID193	3.43869	4.08517	3.86155	3.52817	3.71941	3.67162	3.98876	3.69648	3.6676	3.86601	3.65959	3.92797	3.56887	3.88668	3.43318
ID194	3.716	4.48442	4.05521	3.35393	3.87836	3.83162	4.04233	4.04829	3.89106	3.99621	3.75826	4.12541	3.56889	4.10938	3.43281
ID195	3.62133	4.24731	3.92388	3.53548	3.68492	3.80027	4.08095	3.89706	3.79523	3.95627	3.76225	3.97688	3.56915	3.95121	3.55118
ID196	3.47334	4.08921	3.7071	3.4056	3.47303	3.60341	3.88997	3.71691	3.63535	3.77155	3.58202	3.78407	3.31783	3.72944	3.47471
ID197	3.51997	4.37663	3.8503	3.3973	3.6715	3.70384	3.99633	3.9502	3.83116	3.87084	3.76242	3.91368	3.47744	3.88746	3.49393
ID198	3.54828	4.26926	3.83141	3.42342	3.5559	3.70036	3.96195	3.90766	3.85027	3.88099	3.75651	3.88554	3.42417	3.81116	3.4776
ID199	3.58953	4.29536	3.86981	3.31716	3.62896	3.70337	3.96752	3.87254	3.74389	3.84624	3.64639	3.88307	3.49843	3.9041	3.40993
ID200	3.39184	4.18246	3.79601	3.49735	3.65355	3.61792	3.97858	3.79072	3.75889	3.84037	3.75341	3.87257	3.48714	3.92788	3.41935
ID201	3.60927	4.3622	3.90494	3.52367	3.71123	3.74624	3.93477	4.02642	3.90021	3.96225	3.80711	3.96651	3.45719	3.877	3.56288
ID202	3.42561	4.18192	3.76356	3.41172	3.57447	3.67385	3.87442	3.7744	3.6304	3.78714	3.56227	3.85525	3.42637	3.82875	3.41163
ID203	3.43944	4.16856	3.81311	3.45204	3.60161	3.61176	3.96014	3.82897	3.64884	3.8352	3.67387	3.87585	3.49471	3.87192	3.42361
ID204	3.45193	4.16927	3.7868	3.46524	3.61274	3.6342	3.96923	3.82816	3.76925	3.82679	3.66331	3.86426	3.41279	3.88034	3.47072
ID205	3.50826	4.17324	3.8515	3.4804	3.65533	3.72656	3.97449	3.78677	3.74562	3.89288	3.69552	3.92463	3.45628	3.89086	3.47821
ID206	3.47618	4.13939	3.83481	3.40851	3.54966	3.67378	3.9754	3.7841	3.74298	3.84375	3.65014	3.87176	3.43899	3.83751	3.46726
ID207	3.56702	4.26978	3.86776	3.49569	3.75839	3.70381	4.09456	3.93865	3.78374	3.89004	3.77252	3.95117	3.49992	3.88326	3.53038
ID208	3.56831	4.15705	3.80747	3.33998	3.59297	3.67284	3.90435	3.71178	3.74405	3.85748	3.6696	3.84807	3.35275	3.7569	3.41222
ID209	3.70031	4.47693	4.0384	3.55938	3.8441	3.883	4.14095	4.13474	4.07043	4.04881	3.9576	4.0739	3.63307	4.07115	3.66625
ID210	3.55299	4.37011	3.93807	3.61765	3.69443	3.83139	4.14779	3.97511	3.78328	3.98636	3.7531	3.98845	3.50661	4.01153	3.5721
ID211	3.37728	4.408	3.79114	3.31723	3.54198	3.6153	3.87928	4.02817	3.81715	3.78559	3.6768	3.8414	3.34052	3.81797	3.39922
ID212	3.46022	4.17584	3.8015	3.43851	3.52981	3.65573	3.98254	3.87116	3.65421	3.84836	3.62018	3.91576	3.42454	3.86407	3.47692
ID213	3.53137	4.37156	3.84268	3.47386	3.60267	3.69177	3.99966	3.98607	3.78457	3.91832	3.72562	3.97995	3.49619	3.94351	3.45011
ID214	3.62787	4.16757	3.84542	3.42278	3.55548	3.68065	3.986	3.7845	3.7461	3.86691	3.65148	3.85127	3.51068	3.8681	3.56336
ID215	3.48279	3.91366	3.72191	3.3626	3.46091	3.58573	3.92026	3.5976	3.61308	3.75032	3.48722	3.79703	3.38772	3.76028	3.45631
ID216	3.34858	4.24007	3.69138	3.40502	3.52302	3.54	3.87904	3.8683	3.57886	3.74435	3.45619	3.76678	3.35805	3.78875	3.37913
ID217	3.54172	4.30453	3.8894	3.46032	3.62138	3.72896	4.02589	3.93624	3.78747	3.88481	3.72741	3.91849	3.51374	3.95754	3.50563
ID218	3.55034	4.41078	3.90999	3.53849	3.68479	3.77505	4.04468	4.0987	3.95466	3.9525	3.8544	3.98422	3.51331	3.98858	3.56888
ID219	3.39951	4.15888	3.77536	3.45753	3.51406	3.60333	3.95463	3.77508	3.70864	3.80065	3.59538	3.85608	3.44336	3.86998	3.43468
ID220	3.58292	4.24036	3.88097	3.40066	3.59077	3.72877	4.01559	3.82376	3.83091	3.88057	3.75237	3.92308	3.46155	3.91791	3.44952
ID221	3.4244	4.1424	3.84441	3.4929	3.67624	3.66656	3.9978	3.69532	3.68491	3.86067	3.63598	3.93218	3.50247	3.90118	3.43463
ID222	3.49185	4.39275	3.82364	3.52982	3.67801	3.72187	3.99602	3.94902	3.76721	3.8528	3.70797	3.92075	3.52258	3.86455	3.53222
ID223	3.45717	4.28253	3.75864	3.50117	3.49636	3.67992	4.00578	3.90125	3.76118	3.8358	3.6513	3.88382	3.42081	3.85923	3.50514
ID224	3.51344	4.20893	3.84395	3.43061	3.63051	3.68047	3.98706	3.85916	3.72701	3.86877	3.6525	3.92994	3.50969	3.89803	3.4544
ID225	3.54657	4.2135	3.82538	3.50174	3.62902	3.70305	3.96886	3.92493	3.8669	3.91249	3.7168	3.96898	3.42273	3.86725	3.55762
ID226	3.54149	4.30258	3.84395	3.44769	3.62536	3.70429	3.97974	3.92066	3.80222	3.88638	3.71527	3.9013	3.4619	3.86161	3.49482
ID227	3.53364	4.13738	3.74998	3.45464	3.61894	3.60974	3.93485	3.7698	3.71122	3.7884	3.63918	3.79203	3.44016	3.7635	3.53985
ID228	3.57904	4.34554	3.9417	3.5638	3.74098	3.8393	4.05322	3.96852	3.96651	3.98346	3.82507	4.00413	3.56381	4.0089	3.55791
ID229	3.59477	4.47113	3.92873	3.45274	3.72954	3.79573	4.02871	4.07405	3.77672	3.94558	3.71746	4.00104	3.52395	3.9867	3.45808
ID230	3.64502	4.57438	3.99018	3.45445	3.7537	3.86846	4.05299	4.34908	3.96067	4.02818	3.89274	4.06136	3.54871	4.02816	3.55213
ID231	3.64548	4.17667	3.85453	3.48581	3.5565	3.70841	3.95058	3.72922	3.75694	3.92821	3.72298	3.84689	3.57367	3.86576	3.66106
ID232	3.68741	4.47443	3.93965	3.40727	3.70268	3.76195	4.07428	4.12063	3.85312	3.94823	3.78076	4.01539	3.51592	3.94055	3.54866
ID233	3.45753	4.12987	3.77031	3.47923	3.56947	3.64617	3.94323	3.79429	3.67967	3.83862	3.58657	3.8269	3.41593	3.8428	3.46961
ID234	3.63824	4.39883	3.94788	3.27678	3.74385	3.76583	3.97985	4.06745	3.8805	3.9146	3.77318	3.98448	3.44203	3.97237	3.38967
ID235	3.61741	4.38925	3.97861	3.55479	3.72563	3.85368	4.0924	4.05404	3.91476	4.00696	3.80906	4.02031	3.52005	4.0186	3.57716
ID236	3.60365	4.33598	3.91408	3.4027	3.78847	3.75242	4.04015	3.97966	3.83818	3.91049	3.79443	3.95125	3.48252	3.98476	3.46692
ID237	3.31378	4.08064	3.66288	3.24133	3.45562	3.56914	3.86796	3.73914	3.6327	3.68421	3.49982	3.76475	3.2659	3.76518	3.31527
ID238	3.61221	4.16689	3.73788	3.516	3.61382	3.72474	3.93725	3.82454	3.76857	3.93536	3.71484	3.97201	3.59781	3.89766	3.537
ID239	3.53284	4.34843	3.93238	3.55239	3.68748	3.7858	3.98879	4.02953	3.90262	3.96477	3.81008	3.95328	3.56909	3.94375	3.55983
ID240	3.49343	4.20179	3.80841	3.45672	3.66602	3.68572	3.98537	3.87775	3.76087	3.84803	3.68683	3.88289	3.4426	3.8978	3.45136
ID241	3.62457	4.45031	3.82047	3.29411	3.56678	3.64471	3.95642	4.04658	3.74963	3.87577	3.69132	3.90645	3.40439	3.87133	3.40005
ID242	3.64886	4.48803	4.03492	3.64522	3.81097	3.87464	4.12572	4.11928	3.93615	4.07473	3.90148	4.09125	3.65531	4.05214	3.56481
ID243	3.57403	4.26111	3.9229	3.51154	3.66887	3.78728	3.98412	3.81382	3.87495	3.93986	3.77657	3.90753	3.52006	3.89778	3.60725
ID244	3.46393	4.31378	3.81263	3.43473	3.57956	3.70341	3.97599	3.99894	3.87838	3.87597	3.77223	3.86475	3.4234	3.88505	3.51393
ID245	3.521	4.21791	3.81607	3.36925	3.60151	3.71219	3.91936	3.77969	3.76699	3.80886	3.58981	3.81497	3.53617	3.84794	3.47839
ID246	3.48395	4.37061	3.84544	3.45025	3.66046	3.71395	4.00574	3.97499	3.8477	3.8918	3.75285	3.93097	3.48795	3.89213	3.45531
ID247	3.55985	4.21674	3.84556	3.51529	3.70417	3.65721	4.06218	3.90162	3.77711	3.89803	3.71413	3.93893	3.51735	3.90395	3.52838
ID248	3.61953	4.27499	3.79208	3.40795	3.61416	3.71804	3.97644	3.89451	3.74507	3.87738	3.68495	3.91733	3.37403	3.87753	3.50078
ID249	3.63275	4.30862	3.96378	3.57018	3.73821	3.84299	4.1052	3.96895	3.9428	4.00251	3.84827	3.99768	3.63964	4.02677	3.61421
ID250	3.33271	4.28635	3.73337	3.33666	3.51007	3.60218	3.81871	3.88719	3.75091	3.76801	3.64165	3.80453	3.40228	3.83213	3.31326
ID251	3.4314	4.24058	3.83604	3.38407	3.57208	3.60921	4.0544	3.9106	3.81368	3.85433	3.67444	3.93769	3.47365	3.91859	3.39518
ID252	3.59065	4.33751	3.94278	3.53991	3.66751	3.75039	4.0643	4.05034	3.84612	3.95201	3.74789	3.90647	3.61047	3.9489	3.56965
ID253	3.51924	4.12012	3.83287	3.45151	3.58485	3.68214	3.95831	3.69112	3.69426	3.84894	3.62102	3.85083	3.45432	3.82745	3.4903
ID254	3.51995	4.16375	3.81388	3.48033	3.63321	3.69239	3.95845	3.77732	3.77826	3.87508	3.6788	3.87163	3.45567	3.84741	3.49855
ID255	3.46747	4.07484	3.76851	3.27312	3.52732	3.62282	3.91644	3.70462	3.67653	3.79611	3.70013	3.83184	3.33317	3.83287	3.3563
ID256	3.48106	4.21727	3.81254	3.36609	3.64886	3.67064	3.91866	3.90255	3.7665	3.78848	3.66946	3.87906	3.41296	3.84576	3.42349
ID257	3.58982	4.56452	3.94641	3.58367	3.70542	3.76728	4.07652	4.22914	3.95272	3.98134	3.79976	4.02246	3.64497	3.999	3.5486
ID258	3.45529	4.10269	3.76765	3.3468	3.54973	3.62269	3.8587	3.72954	3.59402	3.74519	3.48458	3.79412	3.44972	3.82485	3.42126
ID259	3.48366	4.11764	3.76793	3.45529	3.56067	3.6241	3.94311	3.70632	3.75339	3.8091	3.59836	3.85761	3.37854	3.77914	3.49852
ID260	3.48884	4.35502	3.81538	3.57596	3.58068	3.68408	4.02352	3.98624	3.76806	3.88973	3.71514	3.88288	3.46825	3.90556	3.55011
ID261	3.49513	4.29971	3.81099	3.41367	3.5797	3.69188	3.90458	3.93603	3.81484	3.83943	3.7187	3.83052	3.43765	3.80939	3.51128
ID262	3.59543	4.43339	3.89345	3.40596	3.69784	3.70254	3.94314	4.01595	3.88196	3.88265	3.75363	3.9394	3.4892	3.88068	3.47614
ID263	3.5165	4.08314	3.79179	3.40905	3.58797	3.65628	3.92776	3.75643	3.72004	3.78477	3.64721	3.80792	3.47853	3.84461	3.46881
ID264	3.49034	4.19268	3.82175	3.42301	3.65335	3.66446	4.06577	3.81463	3.72407	3.82057	3.70761	3.90903	3.41391	3.86548	3.49731
ID265	3.58297	4.23431	3.84989	3.51289	3.66616	3.70496	3.98413	3.84809	3.73137	3.90825	3.67019	3.90471	3.50836	3.84397	3.5526
ID266	3.54894	4.21038	3.7984	3.44967	3.63099	3.64133	3.98542	3.85031	3.81477	3.85985	3.67078	3.88475	3.47713	3.87889	3.50644
ID267	3.44294	4.11077	3.8375	3.48283	3.54048	3.71447	3.98623	3.75761	3.69608	3.85043	3.63423	3.86776	3.44839	3.90458	3.46615
ID268	3.54244	4.25701	3.88607	3.46636	3.64077	3.7181	3.98325	3.84115	3.77973	3.91768	3.65631	3.92883	3.49383	3.88936	3.47166
ID269	3.42577	4.1756	3.76826	3.47097	3.61808	3.61964	3.91448	3.76917	3.65035	3.82937	3.61082	3.8358	3.41608	3.78851	3.44921
ID270	3.45821	4.36676	3.82538	3.39765	3.5845	3.6766	3.977	3.99371	3.84128	3.82915	3.7464	3.85353	3.48075	3.90872	3.44229
ID271	3.53087	4.49094	3.98149	3.54662	3.70749	3.78872	4.06375	4.16319	3.91722	3.9699	3.82099	4.03217	3.62267	4.00682	3.55828
ID272	3.56449	4.49023	3.97145	3.4555	3.7414	3.82268	4.02023	4.14943	3.89278	3.94979	3.86311	4.04414	3.50644	4.02847	3.4849
ID273	3.46309	4.41925	3.84508	3.53928	3.69938	3.70985	3.97847	3.97639	3.86162	3.90351	3.78997	3.91013	3.53847	3.85547	3.44488
ID274	3.57199	4.24403	3.80257	3.52721	3.61251	3.69218	3.95281	3.88498	3.79453	3.89318	3.66235	3.88675	3.45626	3.87382	3.58469
ID275	3.53194	4.36677	3.92668	3.54619	3.62489	3.7216	4.08225	3.95347	3.85756	3.96518	3.74048	4.0258	3.55325	3.95184	3.54804
ID276	3.45832	4.30388	3.82342	3.28967	3.5742	3.63681	3.9151	3.91166	3.73602	3.82757	3.56467	3.92848	3.40139	3.85419	3.31478
ID277	3.68166	4.30392	3.93773	3.55809	3.68954	3.82032	4.05563	3.84357	3.83705	3.97037	3.75627	3.96312	3.50474	3.95427	3.67056
ID278	3.68641	4.42477	3.9839	3.60141	3.80148	3.86437	4.11638	4.04983	3.93461	4.02488	3.87586	4.01898	3.63659	3.99035	3.60875
ID279	3.55354	4.54611	3.9855	3.52358	3.75881	3.77225	4.0502	4.22523	3.98109	3.95969	3.8732	3.99582	3.63779	4.00549	3.55683
ID280	3.58652	4.47317	3.95216	3.59677	3.77931	3.77899	4.07892	4.11608	3.9776	4.00039	3.88904	4.04967	3.61687	3.95771	3.60486
ID281	3.58034	4.39473	3.92597	3.56895	3.72982	3.76857	4.00255	3.99322	3.86182	3.98761	3.78223	3.97779	3.53536	3.88703	3.5462
ID282	3.45183	4.45101	3.88369	3.48491	3.68022	3.7365	4.00957	4.12931	3.8765	3.90378	3.75497	3.94136	3.47013	3.92408	3.46386
ID283	3.56063	4.33533	3.92189	3.43912	3.67542	3.77135	3.92365	3.94159	3.75288	3.94489	3.70874	3.98277	3.42975	3.77011	3.43883
ID284	3.70366	4.21331	3.94439	3.34608	3.71221	3.80716	4.0355	3.86684	3.84964	3.89704	3.73308	3.95334	3.56019	4.03271	3.4979
ID285	3.58711	4.20333	3.95029	3.56724	3.75661	3.74753	4.12186	3.7792	3.83136	3.98946	3.88634	4.04032	3.60204	4.03449	3.56345
ID286	3.54759	4.25291	3.80961	3.52601	3.6222	3.71659	4.01596	3.82004	3.75891	3.87204	3.67937	3.88123	3.50713	3.89114	3.52448
ID287	3.44391	4.2582	3.8018	3.33112	3.58898	3.66496	3.94748	3.8961	3.77956	3.82788	3.66851	3.88029	3.36537	3.88433	3.3583
ID288	3.53624	4.26744	3.88562	3.52876	3.70288	3.78271	4.04882	3.94925	3.89244	3.91544	3.78206	3.94701	3.49037	3.93043	3.56405
ID289	3.56749	4.35362	3.88612	3.58526	3.56887	3.74407	4.07008	4.04995	3.84716	3.95496	3.72145	3.99028	3.60831	4.00011	3.58869
ID290	3.47168	4.45316	3.88082	3.47804	3.54556	3.65878	3.98883	4.09094	3.8567	3.90483	3.67827	3.94124	3.53066	3.9025	3.51252
ID291	3.56124	4.32998	3.86821	3.47602	3.72618	3.77643	3.95648	3.9698	3.84407	3.94204	3.77461	3.92204	3.46844	3.96396	3.44443
ID292	3.51142	4.47008	3.9128	3.49783	3.76957	3.7454	4.03448	4.12872	3.90918	3.94521	3.80592	4.04453	3.4997	3.9424	3.47027
ID293	3.6843	4.4859	4.00726	3.538	3.82851	3.85078	4.09921	4.07445	3.9691	4.02295	3.89892	4.05797	3.61729	4.0029	3.57888
ID294	3.47077	4.17641	3.81141	3.52151	3.58772	3.68283	3.99052	3.78109	3.72942	3.86833	3.6573	3.92804	3.45194	3.86952	3.52456
ID295	3.41877	4.10002	3.80188	3.37289	3.60689	3.58521	3.94932	3.71209	3.63083	3.8127	3.61165	3.85038	3.48592	3.85709	3.38131
ID296	3.44473	4.14766	3.7795	3.39311	3.63169	3.5553	3.93684	3.80227	3.66265	3.80552	3.62056	3.87596	3.43363	3.83641	3.3951
ID297	3.56518	4.404	3.89541	3.45005	3.67559	3.73329	4.04045	4.06025	3.82685	3.95353	3.76742	3.98077	3.52806	3.94455	3.45714
ID298	3.65532	4.49416	4.069	3.57652	3.82945	3.90356	4.07693	4.12739	3.9898	4.05902	3.94914	4.09637	3.64587	4.05788	3.60627
ID299	NA	4.24868	NA	3.11595	3.19151	3.33868	3.78591	3.85757	3.43104	NA	NA	3.6079	NA	3.63859	3.1423
ID300	3.61929	4.23992	3.90468	3.46715	3.57836	3.747	4.02732	3.91841	3.77928	3.91383	3.67683	3.90243	3.49452	3.92742	3.60607
ID301	3.60079	4.38142	3.96734	3.50869	3.68752	3.79222	4.01015	3.96523	3.91392	3.97533	3.86026	4.00573	3.58753	3.97845	3.5844
ID302	3.52315	4.46364	3.8297	3.47476	3.62945	3.64397	4.0095	4.03796	3.82408	3.8944	3.70116	3.8916	3.46268	3.78931	3.49925
ID303	3.59754	4.10324	3.86738	3.43097	3.62909	3.698	3.99113	3.65806	3.68907	3.88609	3.68294	3.88764	3.52099	3.87	3.48562
ID304	3.60132	4.50074	3.94243	3.36868	3.75062	3.74328	3.95901	4.09347	3.88115	3.94896	3.79803	4.01881	3.48879	3.94471	3.44082
ID305	3.4733	4.09542	3.75515	3.40919	3.57431	3.58082	3.98344	3.70025	3.71861	3.80234	3.59576	3.84752	3.37958	3.833	3.39445
ID306	3.66027	4.25523	3.87209	3.44626	3.68091	3.75666	3.97377	3.82371	3.82879	3.92335	3.7562	3.93656	3.4189	3.84329	3.56608
ID307	3.65889	4.30764	3.98298	3.57017	3.8504	3.84937	4.04029	3.90596	3.92957	4.01047	3.93333	4.03602	3.60185	4.02944	3.54225
ID308	3.65998	4.32917	3.93176	3.43402	3.66216	3.77052	4.08201	3.95144	3.81055	3.94258	3.7671	3.9661	3.52618	3.95648	3.57422
ID309	3.49885	4.10902	3.77749	3.42281	3.5482	3.5913	3.90794	3.68478	3.68234	3.8178	3.60867	3.82834	3.4089	3.75394	3.44773
ID310	3.50157	4.34311	3.80601	3.43895	3.63303	3.67885	3.98951	3.86374	3.77089	3.87794	3.68986	3.92882	3.37901	3.87511	3.4192
ID311	3.57157	4.09086	3.78511	3.39116	3.43632	3.63091	3.90618	3.77905	3.67464	3.8276	3.56639	3.82618	3.40289	3.81652	3.53737
ID312	3.68368	4.1395	3.9263	3.5241	3.7303	3.77582	4.02219	3.74671	3.78421	3.98675	3.74614	3.98425	3.57435	3.9253	3.55875
ID313	3.40177	4.02085	3.74095	3.36282	3.57986	3.55183	3.89078	3.66001	3.63967	3.77495	3.58044	3.81026	3.38212	3.78109	3.36809
ID314	3.50497	4.21691	3.86658	3.38395	3.64292	3.70027	3.90107	3.80299	3.76723	3.89588	3.67313	3.90598	3.4523	3.86387	3.36518
ID315	3.66694	4.4095	3.94952	3.57556	3.78144	3.81698	4.04665	4.05108	3.91889	4.021	3.76008	4.007	3.55008	3.98085	3.63045
ID316	3.79699	4.5345	4.03751	3.57389	3.90246	3.90495	4.19264	4.09754	3.99886	4.06277	3.96878	4.07453	3.57913	4.12809	3.62919
ID317	3.58805	4.29994	3.83463	3.42544	3.68786	3.71981	3.95076	3.90815	3.86589	3.94586	3.77695	3.93365	3.42297	3.92424	3.48254
ID318	3.48592	4.38136	3.8311	3.44248	3.62081	3.67748	3.97537	4.02257	3.77644	3.88163	3.65951	3.89107	3.42449	3.84397	3.43038
ID319	3.28253	4.15473	3.67249	3.40876	3.49449	3.50874	3.95209	3.72097	3.62949	3.74959	3.59336	3.81818	3.25121	3.7811	3.34502
ID320	3.64839	4.26559	3.92824	3.3202	3.71539	3.78641	3.87433	3.91241	3.82686	4.00681	3.78943	4.01145	3.34018	3.94594	3.36745
ID321	3.51696	4.09236	3.78261	3.44394	3.50784	3.6296	3.92543	3.6326	3.64296	3.8208	3.53147	3.88089	3.43244	3.84	3.47935
ID322	3.73561	4.37437	3.95185	3.4975	3.68696	3.8046	4.0573	3.95587	3.83861	3.95597	3.8269	3.95426	3.56038	3.99299	3.67022
ID323	3.63455	4.1739	3.91071	3.39761	3.68085	3.77818	4.02678	3.79426	3.74393	3.90476	3.64347	3.93973	3.4985	3.97361	3.4363
ID324	3.52784	4.28822	3.88345	3.55892	3.70159	3.77813	4.01091	3.87343	3.79273	3.90466	3.7417	3.90615	3.51033	3.99251	3.56688
ID325	3.57226	4.44645	3.87201	3.47562	3.7095	3.72177	4.01936	4.06953	3.81784	3.94943	3.76888	3.91139	3.43992	3.95189	3.48956
ID326	3.43257	4.22614	3.91661	3.44528	3.66714	3.6584	3.94443	3.77697	3.76203	3.81146	3.71291	3.85983	3.49104	3.87774	3.42038
ID327	3.64752	4.43942	3.87981	3.5513	3.6029	3.72342	4.04851	4.0891	3.92383	3.95128	3.80329	4.01416	3.46975	3.95948	3.59721
ID328	3.5784	4.31393	3.94331	3.66963	3.7045	3.84108	4.09691	3.85703	3.8378	3.98795	3.79445	3.98392	3.56569	3.99712	3.65137
ID329	3.52137	4.19906	3.80718	3.40644	3.58358	3.68168	3.99554	3.77028	3.69733	3.82681	3.62858	3.86899	3.43547	3.8259	3.47829
ID330	3.60622	4.2905	3.91799	3.48197	3.61753	3.73463	4.02947	3.95859	3.78559	3.94346	3.68914	3.93479	3.43644	3.8892	3.60869
ID331	3.54999	4.23364	3.86341	3.29175	3.68479	3.70719	3.8943	3.82831	3.77607	3.86933	3.72582	3.88374	3.37305	3.86678	3.37119
ID332	3.54775	4.51456	3.91461	3.56357	3.7181	3.77998	3.98675	4.11218	3.99663	4.04608	3.87553	4.02018	3.45568	3.92697	3.53889
ID333	3.67963	4.42603	3.97832	3.57031	3.76677	3.83263	4.11933	4.02393	3.90759	3.99437	3.83531	4.05713	3.60687	4.00596	3.56149
ID334	3.47071	4.04661	3.74611	3.32156	3.50837	3.63309	3.93244	3.74405	3.66154	3.77576	3.57594	3.8027	3.38351	3.84028	3.43253
ID335	3.56676	4.23449	3.91811	3.42232	3.70363	3.79166	3.97648	3.8001	3.79629	3.91706	3.72298	3.92819	3.53014	3.94059	3.4457
ID336	3.65619	4.20668	3.94883	3.57832	3.80579	3.83331	3.99307	3.84414	3.89062	4.01952	3.822	4.04	3.52933	3.95136	3.58623
ID337	3.71146	4.19059	3.86204	3.42822	3.61179	3.70772	4.02212	3.8061	3.79122	3.89633	3.72491	3.88968	3.53437	3.88768	3.64473
ID338	3.56403	4.23842	3.87643	3.3501	3.66078	3.74205	3.99158	3.87197	3.76896	3.90802	3.69976	4.00553	3.41676	3.93602	3.40138
ID339	3.58245	4.11596	3.86573	3.45591	3.62407	3.77195	4.00175	3.74677	3.73394	3.88422	3.68077	3.9231	3.46757	3.95258	3.52482
ID340	3.50155	4.43031	3.89739	3.57813	3.71267	3.78632	4.01644	4.02316	3.88768	3.95259	3.80142	3.94231	3.55177	3.94278	3.50821
ID341	3.52381	4.07782	3.81137	3.45883	3.53834	3.67414	3.89754	3.69398	3.55788	3.85804	3.53037	3.87022	3.62608	3.7032	3.47274
ID342	3.68228	4.50715	4.0057	3.50727	3.77082	3.83459	4.10801	4.12041	3.87798	4.01628	3.77225	4.10307	3.57079	4.00822	3.53315
ID343	3.56412	4.34662	3.88768	3.28635	3.6312	3.67831	3.92911	3.91561	3.80095	3.87163	3.63343	3.95599	3.43139	3.94322	3.35503
ID344	3.46111	4.13278	3.71857	3.44606	3.56504	3.59611	3.89266	3.74265	3.62612	3.80541	3.49679	3.77709	3.42353	3.72139	3.4653
ID345	3.46043	4.26848	3.79753	3.44993	3.62356	3.65165	3.97329	3.86776	3.79137	3.82584	3.67985	3.85209	3.40813	3.78776	3.4704
ID346	3.52486	4.38134	3.87681	3.52468	3.67896	3.75688	4.02446	4.04424	3.89814	3.92482	3.74324	3.98629	3.63953	3.99433	3.51861
ID347	3.56568	4.41326	3.87566	3.53216	3.73195	3.7499	4.0408	4.08521	3.89112	3.90112	3.77764	3.94346	3.5004	3.90693	3.57861
ID348	3.52357	4.29807	3.93825	3.44726	3.67002	3.78722	3.952	3.88866	3.72778	3.92742	3.74335	3.96495	3.53065	3.84668	3.42466
ID349	3.51716	4.2154	3.79008	3.40496	3.53563	3.68945	3.83032	3.77528	3.78976	3.8771	3.70064	3.84506	3.44942	3.76328	3.45874
ID350	3.63605	4.47094	3.9929	3.59526	3.75198	3.85035	4.0933	4.07416	3.91457	4.03038	3.77707	4.02649	3.65144	4.03282	3.62537
ID351	3.66375	4.35907	3.97809	3.42934	3.74532	3.81847	4.06729	3.9421	3.95695	3.99345	3.86637	4.03272	3.56078	3.99628	3.56275
ID352	3.72269	4.33037	4.00571	3.42781	3.78936	3.86318	4.08849	3.9206	3.85069	4.01381	3.8564	4.05922	3.53548	4.0309	3.50045
ID353	3.66247	4.28047	3.91548	3.36316	3.76197	3.73867	3.96659	3.87023	3.79104	3.91831	3.78002	3.99571	3.51364	3.91155	3.4423
ID354	3.31093	4.07469	3.70024	3.2884	3.49255	3.47154	3.8615	3.66541	3.4824	3.70439	3.45978	3.72453	3.28209	3.74217	3.28205
ID355	3.66022	4.18294	3.93003	3.52369	3.54519	3.74678	4.08053	3.85003	3.83984	3.98897	3.75789	3.95724	3.56713	3.96333	3.62611
ID356	3.64591	4.37458	3.98847	3.60414	3.82922	3.80859	4.11383	3.97073	3.94177	4.01829	3.84266	4.02971	3.52264	3.97782	3.63301
ID357	3.66055	4.48347	3.96041	3.27318	3.78932	3.75086	3.99285	4.13241	3.87203	3.95188	3.82629	4.03984	3.38753	3.99055	3.42341
ID358	3.55329	4.43935	3.92479	3.51896	3.70784	3.7802	4.07004	4.08271	3.89529	3.94871	3.81122	3.97036	3.56747	3.98326	3.52449
ID359	3.44946	4.18253	3.77916	3.44887	3.66409	3.64642	3.99761	3.77062	3.74297	3.8011	3.70184	3.8683	3.4504	3.8589	3.44431
ID360	3.64264	4.31036	3.91555	3.54668	3.6657	3.76789	4.107	3.91085	3.84363	3.94628	3.72831	3.99316	3.61412	3.97084	3.60569
ID361	3.71811	4.50099	4.03866	3.55798	3.85275	3.91029	4.06399	4.1403	4.07755	4.131	3.93786	4.18478	3.56053	4.06976	3.55535
ID362	3.32848	4.06934	3.62797	3.33767	3.50703	3.43966	3.83846	3.67248	3.53329	3.69524	3.4844	3.80443	3.30357	3.68603	3.3107
ID363	3.72316	4.14354	3.92225	3.57207	3.7214	3.81636	4.05209	3.79411	3.82747	3.96575	3.75391	3.96347	3.57079	3.97437	3.6422
ID364	3.63865	4.37053	3.87156	3.61478	3.63533	3.72093	4.03258	4.02175	3.78914	3.96144	3.75795	3.92028	3.58369	3.93846	3.65862
ID365	3.54156	4.20054	3.81048	3.38746	3.56215	3.64208	3.91943	3.89678	3.76417	3.84247	3.60675	3.89218	3.40154	3.87558	3.42443
ID366	3.53626	4.21076	3.86604	3.42485	3.63937	3.71375	3.99247	3.88055	3.84105	3.90411	3.75681	3.91965	3.4754	3.88995	3.46256
ID367	3.57861	4.1931	3.8276	3.39928	3.60226	3.6908	3.99049	3.80389	3.76077	3.88543	3.69261	3.89553	3.40153	3.82997	3.4792
ID368	3.61895	4.30605	3.83384	3.38084	3.56696	3.70049	3.90205	3.93118	3.71257	3.87434	3.68066	3.89266	3.44309	3.84107	3.48671
ID369	3.67207	4.56236	3.96099	3.44853	3.79063	3.817	4.04286	4.18889	3.85957	4.00284	3.76754	4.03569	3.55344	3.97488	3.49865
ID370	3.56419	4.28322	3.80379	3.47571	3.58976	3.70744	3.93669	3.85651	3.78982	3.88154	3.70197	3.90033	3.42724	3.79266	3.51834
ID371	3.53843	4.53147	3.83528	3.41951	3.57236	3.6715	3.97927	4.20731	3.79211	3.89777	3.68998	3.93171	3.39293	3.89502	3.43003
ID372	3.59777	4.39749	3.86824	3.61288	3.68599	3.80812	4.00963	3.97536	3.73153	3.98238	3.72998	3.95396	3.55756	3.87444	3.58147
ID373	3.5636	4.32082	3.93116	3.52373	3.60278	3.75574	4.01583	3.95818	3.83927	3.93166	3.74083	3.96756	3.45039	3.94838	3.57016
ID374	3.58291	4.44187	3.94024	3.49276	3.68079	3.76521	4.0349	4.09017	3.9565	3.94707	3.82388	3.99244	3.51867	3.94579	3.56506
ID375	3.64958	4.36187	3.93244	3.54781	3.75228	3.76572	4.03094	3.96334	3.89723	4.00922	3.71161	3.97754	3.54356	3.92302	3.55894
ID376	3.84124	4.35633	4.06813	3.44075	3.93954	3.93487	4.04037	3.97138	3.9051	4.07815	3.82332	4.15517	3.5377	4.0867	3.55882
ID377	3.70389	4.31548	4.11273	3.63529	3.79901	3.95647	4.17981	3.91602	3.9767	4.09357	3.90226	4.11449	3.76696	4.15008	3.62243
ID378	3.5815	4.29156	3.88751	3.56273	3.70323	3.74867	4.12253	3.89256	3.73317	3.91243	3.67811	3.98308	3.54191	3.9617	3.59881
ID379	3.65405	4.36923	3.98056	3.30973	3.77506	3.8022	4.04555	4.02972	3.9678	3.93543	3.82925	4.01125	3.51506	3.99354	3.39971
ID380	3.49104	4.5164	3.84888	3.44268	3.71524	3.75854	3.99833	4.09749	3.85574	3.90904	3.76546	3.98357	3.42495	3.91949	3.44534
ID381	3.54266	4.46399	3.92574	3.52171	3.713	3.80069	4.01865	4.06794	3.88532	3.93112	3.81021	3.94891	3.57721	3.96387	3.46807
ID382	3.65563	4.50633	3.96477	3.61887	3.73112	3.84791	4.05189	4.14769	3.94451	4.05687	3.91757	4.03993	3.56184	3.97315	3.62017
ID383	3.5234	4.22782	3.81445	3.37266	3.66397	3.63123	3.96212	3.88758	3.69826	3.84391	3.68059	3.88977	3.40112	3.85848	3.40039
ID384	3.43701	4.25046	3.71612	3.3034	3.51347	3.56112	3.86515	3.90921	3.70347	3.70646	3.56862	3.81353	3.33854	3.76831	3.406
ID385	3.58996	4.25813	3.9049	3.51985	3.62771	3.77612	4.01923	3.84222	3.84028	3.93879	3.73559	3.9184	3.58163	3.92161	3.58082
ID386	3.63269	4.18875	3.8246	3.39607	3.66949	3.64538	4.07298	3.78289	3.82971	3.82423	3.68931	3.87399	3.54426	3.89411	3.53802
ID387	3.43877	4.09381	3.73541	3.2947	3.51649	3.56109	3.8488	3.77397	3.69482	3.7364	3.59679	3.74291	3.3918	3.75941	3.37058
ID388	3.468	4.48074	3.86238	3.49265	3.61087	3.67983	4.0544	4.12178	3.85947	3.87021	3.68667	3.94362	3.46722	3.86448	3.51523
ID389	3.44596	4.26819	3.73763	3.37091	3.54585	3.5938	3.94729	3.92647	3.71669	3.78964	3.60239	3.79984	3.40342	3.77515	3.43942
ID390	3.48879	4.26177	3.80089	3.40525	3.51267	3.64322	3.96795	3.90573	3.8049	3.82076	3.6601	3.90979	3.40429	3.87241	3.45977
ID391	3.47606	4.26689	3.77961	3.42109	3.55152	3.65754	3.89473	3.82621	3.72797	3.78679	3.65422	3.79363	3.41436	3.78058	3.46307
ID392	3.53337	4.44061	3.87419	3.51441	3.65969	3.70892	4.01108	4.04224	3.85708	3.91596	3.71342	3.93599	3.50749	3.88914	3.47791
ID393	3.57446	4.1569	3.84117	3.53491	3.67882	3.71598	4.06875	3.82212	3.78199	3.91749	3.65753	3.94316	3.52776	3.8998	3.5492
ID394	3.50763	4.18573	3.84146	3.40162	3.42989	3.67524	3.85451	3.77144	3.70578	3.88384	3.60302	3.8953	3.45436	3.78823	3.49779
ID395	3.64581	4.1663	3.91843	3.5011	3.65001	3.79986	4.02822	3.7544	3.84633	3.97637	3.76765	3.90812	3.41055	3.92203	3.61746
ID396	3.62525	4.06733	3.80824	3.41096	3.51883	3.70516	3.98066	3.62924	3.67792	3.8399	3.64504	3.86769	3.37433	3.86546	3.58489
ID397	3.46247	4.27199	3.85862	3.5693	3.64822	3.72614	4.01571	3.87281	3.79982	3.91025	3.70034	3.91014	3.50103	3.9423	3.52733
ID398	3.44559	3.98686	3.78158	3.41078	3.53035	3.59412	3.95381	3.6048	3.64706	3.80777	3.65648	3.82549	3.41946	3.78796	3.39707
ID399	3.57065	4.1107	3.81163	3.40712	3.58471	3.69327	3.95089	3.70826	3.6765	3.83593	3.52972	3.8576	3.41009	3.83704	3.57485
ID400	3.60891	4.4555	3.92798	3.58447	3.77112	3.81042	4.05626	4.14125	3.96033	4.03054	3.89046	4.0648	3.58148	3.98709	3.6038
ID401	3.62559	4.29921	3.86893	3.46641	3.65486	3.69127	3.93703	3.94885	3.88031	3.93288	3.66933	3.94069	3.47634	3.84008	3.58659
ID402	3.4538	4.19898	3.80423	3.40696	3.55507	3.66922	3.94949	3.83171	3.76221	3.82826	3.62448	3.87065	3.47425	3.82964	3.4585
ID403	3.54953	4.50371	3.9507	3.55719	3.73479	3.78829	4.06058	4.10454	3.97949	3.9872	3.83891	4.03808	3.55367	3.99537	3.5323
ID404	3.52083	4.517	3.94062	3.4766	3.68528	3.70002	4.01572	4.19281	3.7954	3.93127	3.70665	4.01378	3.56409	4.00457	3.44416
ID405	3.6643	4.15947	3.88815	3.5452	3.66546	3.7517	4.01319	3.76693	3.79429	3.87576	3.7325	3.88548	3.57716	3.86612	3.60239
ID406	3.4444	4.1073	3.77382	3.34347	3.40242	3.59047	3.93589	3.77882	3.68938	3.793	3.55868	3.81844	3.43244	3.86487	3.43661
ID407	3.65733	4.45121	3.9133	3.3355	3.66723	3.75379	3.99267	4.12586	3.83481	3.93809	3.79275	3.96959	3.46971	3.97009	3.42293
ID408	3.58943	4.37763	3.90216	3.47691	3.68423	3.77588	4.01613	3.98453	3.84841	3.93101	3.7615	3.93565	3.54583	3.93241	3.51531
ID409	3.5554	4.48304	3.94079	3.55371	3.76891	3.80248	4.07512	4.14942	3.92201	3.98921	3.83561	4.03333	3.51839	4.00036	3.56124
ID410	3.68419	4.46289	3.9957	3.50464	3.75669	3.86113	4.06995	4.13065	3.96431	4.03892	3.91111	4.0577	3.56221	4.02046	3.59778
ID411	3.56425	4.13701	3.85922	3.43347	3.55318	3.70715	4.00779	3.75978	3.72645	3.86669	3.5822	3.89789	3.52993	3.85973	3.51619
ID412	3.50651	4.20719	3.89844	3.51456	3.62869	3.74872	4.04726	3.81796	3.7705	3.89495	3.70706	3.92498	3.49073	3.97679	3.54075
ID413	3.61416	4.45085	3.94157	3.48727	3.70701	3.76432	4.08324	4.07245	3.99125	3.96906	3.86238	3.98815	3.52949	3.95845	3.57482
ID414	3.72845	3.97652	3.91852	3.46938	3.72166	3.77916	4.08443	3.5726	3.73621	3.95073	3.61126	3.94404	3.61138	3.94482	3.58505
ID415	3.44885	4.06075	3.76152	3.49512	3.6697	3.55499	3.93495	3.64498	3.64345	3.85728	3.63107	3.87929	3.44084	3.84653	3.4193
ID416	3.5797	4.37306	3.96752	3.5612	3.73192	3.84704	4.13682	4.00202	3.8664	4.00601	3.79446	4.0549	3.61806	4.0419	3.53465
ID417	3.61961	4.33289	3.9137	3.60802	3.75057	3.82261	4.05209	3.97507	3.83617	3.9768	3.75321	3.97637	3.57892	3.95088	3.58687
ID418	3.43926	4.17765	3.85647	3.50132	3.67622	3.70371	4.03512	3.80326	3.78564	3.88335	3.7336	3.93294	3.48733	3.91406	3.48185
ID419	3.32455	4.0975	3.66971	3.25529	3.43594	3.54839	3.77171	3.73792	3.63747	3.69119	3.53803	3.74323	3.2569	3.70724	3.29885
ID420	3.57077	4.366	3.89845	3.39374	3.70439	3.74226	3.91354	3.98024	3.81492	3.92984	3.76983	3.9631	3.38854	3.9342	3.42666
ID421	3.52205	4.10088	3.79216	3.44694	3.46525	3.6367	3.90779	3.77042	3.70196	3.84588	3.64761	3.79197	3.47841	3.81735	3.529
ID422	3.50444	4.41642	3.91223	3.51898	3.6658	3.75573	3.97971	3.99366	3.79729	3.9289	3.71779	4.00159	3.53621	3.94863	3.50019
ID423	3.43634	4.0886	3.68241	3.35172	3.53814	3.53729	3.89589	3.65309	3.58946	3.67916	3.51563	3.74356	3.37776	3.73708	3.42132
ID424	3.65007	4.42189	3.99251	3.62233	3.78185	3.83539	4.08008	4.09603	3.9736	4.02375	3.87062	4.03871	3.63093	4.00094	3.65325
ID425	3.62454	4.53706	4.04246	3.45327	3.83397	3.83433	3.98849	4.20177	4.0444	4.04374	3.91454	4.1357	3.5274	4.13326	3.49229
ID426	3.5447	4.24258	3.82078	3.51354	3.71072	3.72795	3.99966	3.83491	3.7932	3.94162	3.72139	3.92801	3.43942	3.93073	3.46664
ID427	3.72488	4.20098	4.00033	3.42852	3.79117	3.84031	4.10826	3.7857	3.83698	4.01563	3.75888	4.07325	3.55218	4.09113	3.44015
ID428	3.44058	4.31557	3.80919	3.52699	3.61282	3.68761	4.04698	3.96015	3.75104	3.89246	3.63865	3.93415	3.36627	3.88195	3.49113
ID429	3.64558	4.56577	4.027	3.70234	3.83883	3.83841	4.03752	4.1118	3.90721	4.0888	3.82914	4.12669	3.56254	3.86205	3.59778
ID430	3.56252	4.44032	3.97955	3.51596	3.85277	3.82752	4.026	4.13166	3.9322	4.0146	3.87301	4.04981	3.52729	4.00043	3.4818
ID431	3.67179	4.17541	3.98573	3.3428	3.76344	3.83535	4.08813	3.76874	3.79587	3.97791	3.75435	4.09254	3.45113	4.01471	3.44246
ID432	3.38958	4.18165	3.76281	3.34117	3.4503	3.59658	3.88062	3.8123	3.63831	3.75065	3.56623	3.76398	3.39685	3.83753	3.40286
ID433	3.54412	4.29492	3.89635	3.47526	3.74868	3.7762	3.97979	3.9141	3.83972	3.94043	3.77071	3.98004	3.48903	3.95587	3.4737
ID434	3.55106	4.06588	3.73412	3.36612	3.42282	3.55459	3.9252	3.67386	3.65274	3.76599	3.51209	3.8252	3.42582	3.78078	3.51585
ID435	3.62334	4.12507	3.90397	3.48126	3.56551	3.74225	4.10181	3.79135	3.7997	3.92831	3.70687	3.95521	3.55789	3.9574	3.55366
ID436	3.5401	4.03399	3.67179	3.39695	3.42949	3.56062	3.89739	3.60751	3.64813	3.76082	3.54083	3.73959	3.35528	3.70005	3.51313
ID437	3.37884	4.15705	3.76712	3.37476	3.5605	3.55253	3.9186	3.80196	3.59385	3.7875	3.59539	3.83577	3.40537	3.85479	3.37992
ID438	3.60223	4.46816	3.98019	3.65571	3.73686	3.8746	4.18361	4.10349	3.99902	4.04175	3.94155	4.0806	3.62529	4.10076	3.6585
ID439	3.68313	4.43538	4.01358	3.48255	3.8325	3.85568	4.10809	4.13344	4.00257	4.02769	3.9184	4.0233	3.50851	4.07508	3.54718
ID440	3.36805	4.07751	3.73224	3.37656	3.46874	3.58442	3.90247	3.75073	3.6593	3.75918	3.53999	3.80209	3.37107	3.83285	3.39673
ID441	3.56459	4.42902	3.92611	3.52977	3.70222	3.77042	4.05534	4.04448	3.8572	3.94899	3.78841	3.9561	3.56068	3.97371	3.54449
ID442	3.56681	4.48781	3.92097	3.52215	3.76094	3.78651	3.94279	4.09417	4.002	4.01808	3.87208	3.99255	3.49613	3.86653	3.48417
ID443	3.57867	4.4909	3.91684	3.20479	3.70216	3.77928	3.90647	4.09471	3.8863	3.94876	3.81221	3.98966	3.29325	4.01473	3.26671
ID444	3.42379	3.95625	3.6505	3.25921	3.43894	3.44843	3.83756	3.52985	3.58577	3.67474	3.43036	3.67629	3.32151	3.67074	3.3625
ID445	3.39317	4.23448	3.77571	3.35404	3.5637	3.62163	3.93411	3.83398	3.64059	3.80467	3.54265	3.86618	3.38746	3.86063	3.33557
ID446	3.63644	4.3848	3.97838	3.55626	3.71379	3.84734	4.09207	4.03546	3.94445	4.00658	3.81667	4.02347	3.62808	3.99244	3.58764
ID447	3.5472	4.21594	3.88372	3.48674	3.61238	3.71565	4.02456	3.74121	3.79767	3.92788	3.70743	3.94801	3.46648	3.90661	3.55881
ID448	3.51596	4.24325	3.92967	3.38579	3.73091	3.75907	3.95838	3.90029	3.83646	3.92697	3.75141	3.96299	3.51626	3.982	3.4057
ID449	3.46979	4.19504	3.85471	3.57318	3.6607	3.72325	4.01039	3.83703	3.79619	3.90152	3.73276	3.93235	3.47328	3.91385	3.54415
ID450	3.60776	4.53664	3.99586	3.64845	3.82766	3.87107	4.05938	4.14596	4.0291	4.07553	3.93063	4.1225	3.57464	4.005	3.59825
ID451	3.3615	4.1536	3.76605	3.52359	3.54746	3.62305	3.95564	3.73776	3.63654	3.82045	3.59183	3.83667	3.44938	3.84981	3.43941
ID452	3.62101	4.37049	3.93081	3.50943	3.65448	3.80577	4.03523	4.05768	3.86467	3.94242	3.78325	3.94747	3.519	3.97848	3.64192
ID453	3.39218	4.08289	3.89715	3.43429	3.57883	3.65076	3.92688	3.7079	3.74225	3.82468	3.65897	3.84331	3.44612	3.83991	3.41031
ID454	3.50846	4.14879	3.78273	3.43963	3.58867	3.66907	3.97451	3.75252	3.73549	3.82985	3.64633	3.89309	3.45386	3.80867	3.4949
ID455	3.55759	4.41018	3.89533	3.50642	3.73319	3.76736	3.97904	4.05314	3.87628	3.94922	3.80358	3.94634	3.50522	3.97046	3.50914
ID456	3.61519	4.42007	3.95994	3.40248	3.76767	3.80111	4.01714	4.01075	3.8322	3.93187	3.76307	4.01548	3.51095	3.99276	3.43625
ID457	3.64114	4.32202	3.87577	3.50293	3.65179	3.7231	4.04152	3.99825	3.8697	3.91296	3.77224	3.9663	3.55623	3.90585	3.59242
ID458	3.43819	4.37267	3.77708	NA	3.70527	3.58738	3.7983	4.05229	3.71488	3.71864	3.63114	3.90265	3.11002	3.86514	NA
ID459	3.49607	4.16431	3.82782	3.37437	3.5555	3.67598	3.933	3.77744	3.68699	3.85504	3.6179	3.84772	3.42066	3.86331	3.47472
ID460	3.58358	4.3044	3.84518	3.43142	3.65164	3.70154	3.99116	3.97	3.83224	3.89404	3.70461	3.96215	3.44384	3.88823	3.48203
ID461	3.59132	4.50598	3.9759	3.3847	3.81209	3.82251	4.02532	4.18341	3.89644	3.97942	3.83429	4.08694	3.45582	4.04776	3.41209
ID462	3.59617	4.17201	3.82988	3.44643	3.61965	3.6936	3.99399	3.79303	3.76802	3.86389	3.71938	3.8226	3.47087	3.91783	3.52058
ID463	3.55106	4.34419	3.86543	3.46947	3.63897	3.70575	3.96005	3.93465	3.75484	3.89093	3.56479	3.89747	3.57418	3.90237	3.52629
ID464	3.50655	4.5251	3.89946	3.40155	3.637	3.66559	3.9891	4.08159	3.79069	3.882	3.70934	3.92622	3.44162	3.85534	3.42804
ID465	3.50844	4.26503	3.85001	3.43779	3.6246	3.76605	3.92993	3.87725	3.80647	3.85591	3.77669	3.89108	3.5183	3.9065	3.48381
ID466	3.45633	4.13185	3.778	3.49421	3.57721	3.66089	3.95751	3.77683	3.69783	3.81285	3.59092	3.84147	3.46573	3.86006	3.46771
ID467	3.47581	4.45509	3.8996	3.36739	3.66543	3.70383	3.98432	4.04819	3.91411	3.90191	3.72962	4.00128	3.46324	3.98544	3.37
ID468	3.5263	4.38826	3.86522	3.54544	3.61954	3.74115	4.01228	4.0374	3.79933	3.88391	3.72952	3.93981	3.48063	3.91369	3.57262
ID469	3.6058	4.38699	3.93329	3.48601	3.80769	3.78098	4.08338	4.10196	3.86655	3.96481	3.78983	4.09651	3.56257	4.02253	3.48496
ID470	3.50897	4.24383	3.84408	3.58091	3.63595	3.76489	4.04688	3.8371	3.82698	3.91972	3.76938	3.93163	3.45925	3.9332	3.56983
ID471	3.60338	4.20886	3.89918	3.37527	3.6902	3.74788	4.03174	3.866	3.82655	3.91512	3.69455	3.97903	3.44012	3.92718	3.49231
ID472	3.6329	4.30574	3.94292	3.53198	3.79599	3.8539	4.04902	3.89813	3.86397	3.9926	3.82448	4.02123	3.54416	3.99998	3.5242
ID473	3.55989	4.38656	3.868	3.55513	3.65827	3.75178	4.07835	4.00703	3.88817	3.9231	3.79436	3.94856	3.53062	3.97058	3.55617
ID474	3.56694	4.2566	3.85113	3.24233	3.72732	3.62034	3.91188	3.82096	3.79366	3.84195	3.69714	3.90596	3.3774	3.87508	3.30588
ID475	3.69896	4.58604	4.03249	3.49529	3.75218	3.8623	4.1195	4.24347	3.94448	4.04514	3.85163	4.11832	3.54294	4.08775	3.57321
ID476	3.62051	4.24207	3.92688	3.50506	3.64662	3.82965	4.01197	3.85748	3.8658	3.9854	3.80984	3.93548	3.49837	3.92045	3.60465
ID477	3.59423	4.22845	3.85688	3.46301	3.64964	3.74056	4.00236	3.86544	3.80285	3.92587	3.67172	3.9343	3.49955	3.90933	3.5089
ID478	3.66838	4.41092	4.00045	3.53994	3.78621	3.85213	4.10989	4.06712	3.95114	4.02694	3.90145	4.09022	3.56385	4.04569	3.61257
ID479	3.59157	4.17949	3.89835	3.42929	3.62566	3.71801	3.98554	3.80225	3.73752	3.92026	3.61424	3.95588	3.546	3.90068	3.43452
ID480	3.55629	4.28201	3.94929	3.48589	3.73125	3.85328	4.07441	3.98864	3.8977	3.96045	3.80497	4.00958	3.53845	4.01687	3.49157
ID481	3.57924	4.2013	3.86058	3.51767	3.72613	3.69816	4.06512	3.84776	3.80404	3.90952	3.77335	3.98305	3.48715	3.94876	3.5386
ID482	3.59575	4.36414	3.92763	3.5422	3.73564	3.8224	4.06611	3.98091	3.82823	3.96595	3.75044	3.96822	3.51099	3.9761	3.50767
ID483	3.45589	4.11405	3.77147	3.51095	3.64897	3.70447	3.92086	3.75819	3.77491	3.83136	3.72027	3.809	3.47251	3.82716	3.47717
ID484	3.54475	4.39516	3.87274	3.47368	3.6843	3.71722	4.03195	4.00569	3.81605	3.91099	3.70933	3.9973	3.45216	3.92492	3.45025
ID485	3.53593	4.39718	3.91506	3.5343	3.62798	3.78213	4.04628	4.02405	3.88472	3.95232	3.80143	3.96743	3.5782	3.9263	3.51416
ID486	3.62433	4.28546	3.92346	3.41828	3.67643	3.77023	3.97169	3.88415	3.77126	3.91082	3.71519	3.89511	3.52181	3.90011	3.55836
ID487	3.55028	4.33942	3.87527	3.53144	3.71144	3.71872	3.96426	3.92831	3.89929	3.94463	3.80785	3.93982	3.46865	3.82337	3.51204
ID488	3.68588	4.30301	3.90064	3.34837	3.70971	3.7228	4.0151	3.88506	3.78644	3.91019	3.72288	3.98038	3.44726	3.96588	3.51357
ID489	3.66187	4.36783	3.97889	3.34712	3.72923	3.81777	3.99601	3.97787	3.87201	3.98406	3.85385	4.03775	3.53409	4.00039	3.46405
ID490	3.38987	4.03524	3.68999	3.33905	3.40655	3.56552	3.86141	3.64377	3.62986	3.72892	3.51743	3.76647	3.3756	3.78564	3.37134
ID491	3.59996	4.28673	3.89062	3.46176	3.68238	3.78112	4.09139	3.88682	3.85806	3.92275	3.79905	3.91862	3.47157	3.90136	3.54626
ID492	3.6035	4.31897	3.94899	3.48575	3.73233	3.81993	4.03786	3.94053	3.84659	4.00433	3.79201	4.03199	3.51518	3.97279	3.5069
ID493	3.49659	4.10217	3.79808	3.40662	3.60274	3.62354	4.00121	3.72903	3.67118	3.84564	3.62662	3.87405	3.42578	3.82799	3.4602
ID494	3.60158	4.34891	3.87713	3.51786	3.64453	3.93373	4.04129	4.00378	3.8404	3.92938	3.72631	3.94109	3.50582	3.95585	3.56737
ID495	3.39132	4.26488	3.77451	3.44563	3.56801	3.62846	3.93728	3.87405	3.70915	3.83374	3.66686	3.88983	3.43265	3.867	3.42571
ID496	3.59989	4.30378	3.91493	3.52722	3.69784	3.7664	4.05973	3.96557	3.85895	3.94646	3.74469	3.97687	3.52483	3.98474	3.52505
ID497	3.5571	4.41194	3.91727	3.4834	3.58403	3.72927	4.04169	4.02136	3.92509	3.94123	3.79614	3.99777	3.46023	3.94722	3.5275
ID498	3.65769	4.16286	3.93941	3.4412	3.71306	3.7781	3.99465	3.78402	3.88919	3.93667	3.77386	3.94527	3.46597	3.94571	3.56228
ID499	3.474	4.11943	3.73077	3.41368	3.62005	3.55787	3.94331	3.73628	3.63747	3.77864	3.55555	3.8173	3.44115	3.79121	3.42788
ID500	3.58755	4.27119	3.9072	3.48956	3.61126	3.78909	4.00102	3.91133	3.90031	3.92396	3.76938	3.95481	3.48526	3.93749	3.57635
ID501	3.63516	4.15115	3.92312	3.50433	3.63755	3.80869	4.01428	3.74926	3.78208	3.94946	3.71308	3.93385	3.53702	3.95871	3.58402
ID502	3.25822	4.03937	3.73431	3.32433	3.56037	3.54239	3.89377	3.63844	3.55749	3.74053	3.54268	3.78372	3.32125	3.77667	3.29448
ID503	3.64812	4.34536	3.943	3.46473	3.65658	3.74412	4.05586	3.97095	3.88424	3.99019	3.76987	4.03799	3.48318	3.98759	3.54355
ID504	3.65196	4.49777	3.99182	3.56424	3.81539	3.88235	4.08689	4.12755	4.03376	4.02907	3.94304	4.11561	3.60563	4.04621	3.5957
ID505	3.6838	4.30212	3.88985	3.44134	3.72874	3.74274	3.97901	3.89166	3.90911	3.95095	3.80858	3.98565	3.47311	3.88694	3.52387
ID506	3.57968	4.33383	3.91985	3.50836	3.65566	3.81335	4.06944	3.87476	3.79163	3.96826	3.77398	3.99368	3.54634	3.98942	3.52493
ID507	3.36983	4.40268	3.75214	3.361	3.50646	3.54171	3.90487	4.05959	3.73324	3.76925	3.62838	3.866	3.3554	3.76872	3.35817
ID508	3.49322	4.18069	3.80827	3.43775	3.56213	3.66091	3.98337	3.75424	3.69356	3.8455	3.60398	3.87864	3.43057	3.87027	3.40412
ID509	3.56775	4.17946	3.93701	3.56883	3.61195	3.78978	4.04914	3.75205	3.79384	3.96153	3.7364	3.94123	3.55509	3.93364	3.57082
ID510	3.51635	4.13162	3.83052	3.48914	3.63964	3.70972	3.94572	3.73462	3.69997	3.84459	3.65454	3.8491	3.5337	3.88239	3.48469
ID511	3.51885	4.22575	3.83553	3.32474	3.66309	3.67446	3.92408	3.80109	3.69329	3.83871	3.64456	3.89019	3.4084	3.87937	3.36079
ID512	3.50251	4.25772	3.86685	3.51108	3.65138	3.76484	3.95326	3.84612	3.81693	3.88716	3.75705	3.90169	3.50998	3.93732	3.51345
ID513	3.50668	4.3109	3.92341	3.5812	3.71581	3.77866	4.04646	3.97256	3.91067	3.97059	3.80906	3.97707	3.5373	3.93587	3.54086
ID514	3.57234	4.34977	3.80642	3.42241	3.53752	3.64248	3.91697	4.0295	3.76586	3.84844	3.60761	3.86456	3.52787	3.87558	3.5339
ID515	3.63353	4.17552	3.94068	3.28097	3.75036	3.76177	3.95675	3.79478	3.80547	3.94609	3.76047	3.96144	3.47574	3.99731	3.37093
ID516	3.5377	4.12045	3.80404	3.43545	3.61322	3.71573	3.94328	3.69777	3.71554	3.86218	3.64677	3.85396	3.52031	3.85727	3.43965
ID517	3.57633	4.1095	3.78384	3.40767	3.58217	3.6644	3.94142	3.73047	3.69673	3.83008	3.62655	3.86362	3.46337	3.82669	3.51898
ID518	3.60394	4.38916	3.98178	3.51092	3.75411	3.84989	4.08098	4.05726	3.9407	4.00296	3.84976	4.04572	3.58486	4.02577	3.5256
ID519	3.51975	4.16258	3.83336	3.42187	3.54832	3.67653	3.98238	3.82435	3.78998	3.84394	3.67679	3.86186	3.49706	3.93801	3.47384
ID520	3.68184	4.30901	3.76247	3.56298	3.69119	3.80208	4.00051	4.00578	3.82251	3.95902	3.72978	4.01047	3.60635	3.96739	3.6551
ID521	3.30138	4.08448	3.69758	3.3615	3.61289	3.53049	3.87381	3.73202	3.63469	3.73253	3.63238	3.78513	3.32721	3.75012	3.30943
ID522	3.52157	4.25984	3.84912	3.46602	3.66365	3.73003	3.99054	3.86096	3.76665	3.89138	3.62672	3.9029	3.45533	3.90419	3.51302
ID523	3.57385	4.0021	3.82577	3.49574	3.55536	3.73148	3.96969	3.57369	3.69221	3.89624	3.64709	3.84203	3.48462	3.84889	3.53163
ID524	3.64902	4.30578	3.9644	3.5545	3.71949	3.80013	4.06696	3.90579	3.83077	3.99299	3.76203	4.03288	3.59769	3.97896	3.56375
ID525	3.52133	4.12845	3.81685	3.45089	3.60928	3.68562	3.9165	3.65585	3.73517	3.88225	3.66355	3.88034	3.46544	3.8308	3.45067
ID526	3.40606	4.32906	3.76055	3.31386	3.58124	3.55778	3.88439	3.92134	3.67265	3.74258	3.57148	3.81145	3.35814	3.84213	3.36994
ID527	3.50696	4.3809	3.86696	3.53705	3.6373	3.70719	4.02158	4.08641	3.81194	3.8881	3.68409	3.90923	3.47774	3.9377	3.54431
ID528	3.36747	4.09456	3.7286	3.4102	3.52193	3.56876	3.95446	3.75452	3.53691	3.76114	3.49585	3.81784	3.3581	3.80475	3.39013
ID529	3.56228	4.23179	3.85148	3.48887	3.6858	3.73525	3.99041	3.76767	3.83717	3.90294	3.63615	3.89251	3.47758	3.88074	3.54994
ID530	3.53079	4.07725	3.8546	3.51172	3.65738	3.63115	4.06671	3.70517	3.76791	3.90061	3.72343	3.91482	3.51448	3.89053	3.51684
ID531	3.48339	4.26951	3.94911	3.56157	3.7551	3.77661	4.0623	3.94644	3.90385	3.96345	3.88334	3.98347	3.58935	4.0131	3.49872
ID532	3.58973	4.40921	3.8784	3.51667	3.64257	3.72345	4.07793	4.01799	3.79697	3.9161	3.66004	3.96657	3.52749	3.95221	3.60032
ID533	3.60678	4.21416	3.89588	3.47073	3.68878	3.73584	4.02338	3.88691	3.83177	3.94104	3.74997	3.99831	3.53023	3.95977	3.50921
ID534	3.52605	4.15971	3.82432	3.43077	3.71191	3.67713	3.96406	3.70783	3.68387	3.84284	3.62963	3.87253	3.47279	3.84752	3.47944
ID535	3.60477	4.29734	3.85376	3.56355	3.68866	3.7382	4.03333	3.93519	3.82827	3.92167	3.72171	3.96195	3.58358	3.92518	3.61224
ID536	3.62854	4.24794	3.94771	3.35649	3.72501	3.75602	4.00921	3.89312	3.87196	3.9696	3.76453	4.06192	3.46284	3.93503	3.41616
ID537	3.62088	4.29609	3.93471	3.48267	3.71779	3.77166	4.11348	3.89382	3.86897	3.96445	3.79388	4.02932	3.59334	4.00831	3.50514
ID538	3.7671	4.36567	3.98493	3.49167	3.83056	3.83639	4.07523	3.9793	3.91269	4.0479	3.82577	4.13139	3.57754	4.0694	3.50781
ID539	3.61168	4.3598	3.9109	3.46433	3.63233	3.75928	3.95914	4.05208	3.86657	3.96282	3.82004	3.96267	3.49476	3.9185	3.55043
ID540	3.42163	4.21505	3.75913	3.29424	3.48461	3.58636	3.90265	3.80794	3.69763	3.78245	3.5668	3.80979	3.3675	3.77611	3.36831
ID541	3.7182	4.27791	3.89643	3.43646	3.71997	3.79532	4.06461	3.86611	3.85843	3.90698	3.78584	3.94993	3.55751	3.9481	3.57963
ID542	3.38148	4.18418	3.76449	3.41364	3.57667	3.60829	3.90014	3.80796	3.6974	3.78649	3.59993	3.84126	3.38458	3.81723	3.37511
ID543	3.59909	4.43034	3.99019	3.51802	3.779	3.81962	3.99667	3.98199	3.85189	3.9856	3.7894	3.98817	3.59547	4.04959	3.46372
ID544	3.38256	3.9718	3.66337	3.29051	3.44537	3.50902	3.86331	3.60179	3.55944	3.67807	3.49878	3.70187	3.34854	3.75003	3.30603
ID545	3.6035	4.18349	3.94902	3.60332	3.7209	3.79028	4.12507	3.75059	3.77858	3.98681	3.71391	4.01327	3.64904	3.98548	3.56168
ID546	3.6091	4.40724	3.96211	3.52511	3.72843	3.83493	4.02063	4.01334	3.9021	4.01178	3.80098	3.98555	3.57656	3.99077	3.53707
ID547	3.62935	4.50275	4.0115	3.52296	3.80382	3.84917	4.05774	4.09713	3.91433	4.01067	3.85989	4.05909	3.57456	4.00849	3.50218
ID548	3.54551	4.3847	3.8952	3.6031	3.80971	3.72663	4.09632	4.00044	3.86572	3.90996	3.81138	3.94616	3.63474	3.97483	3.56566
ID549	3.59518	4.44353	3.83653	3.53298	3.5256	3.71088	4.09193	4.01189	3.81017	3.90976	3.75776	3.98062	3.49195	3.91481	3.63345
ID550	3.51893	4.4811	3.98491	3.55559	3.65323	3.7292	4.07297	4.08969	3.88847	3.95442	3.8167	3.98428	3.48986	3.9042	3.59668
ID551	3.4963	4.16916	3.76944	3.52121	3.67668	3.68642	3.91213	3.82407	3.76887	3.87412	3.68227	3.8418	3.42149	3.8313	3.51726
ID552	3.54473	4.3443	3.83358	3.39277	3.53994	3.67601	3.90527	3.92029	3.8129	3.86024	3.72042	3.87884	3.39722	3.85361	3.4428
ID553	3.6029	4.30997	3.93382	3.36427	3.76681	3.80993	4.07715	3.95766	3.83043	3.95569	3.76188	4.02823	3.46657	4.00342	3.42503
ID554	3.61567	4.27566	3.86613	3.30113	3.63268	3.64986	4.06012	3.891	3.67795	3.87163	3.60194	3.92733	3.44063	3.93074	3.40428
ID555	3.56842	4.15293	3.86608	3.49326	3.74275	3.68286	4.04418	3.75253	3.75373	3.89154	3.69329	3.96293	3.60446	3.90099	3.49751
ID556	3.61269	4.13502	3.83366	3.43741	3.45699	3.70373	3.98355	3.80407	3.63343	3.90497	3.65389	3.84879	3.47761	3.8848	3.53549
ID557	3.49193	4.30244	3.88278	3.48705	3.64429	3.71639	4.03188	3.95931	3.83559	3.91876	3.74906	3.97861	3.52646	3.92796	3.49586
ID558	3.55202	3.98331	3.73866	3.32757	3.45008	3.61988	3.93226	3.60681	3.5704	3.76719	3.49529	3.80867	3.42102	3.81555	3.45612
ID559	3.54798	4.17825	3.81972	3.42632	3.57251	3.69734	3.97597	3.78055	3.72407	3.86043	3.66196	3.85023	3.39349	3.86954	3.55482
ID560	3.45668	4.29733	3.75914	3.38721	3.59552	3.64167	3.93345	3.94535	3.77761	3.8042	3.69856	3.82434	3.4324	3.84329	3.40392
ID561	3.60379	4.28271	3.89603	3.28053	3.64973	3.71933	4.0048	3.95687	3.77662	3.88883	3.66131	3.95532	3.453	3.94326	3.41507
ID562	3.38552	4.13735	3.63969	3.31273	3.38578	3.55532	3.76538	3.71749	3.49582	3.69951	3.47795	3.73075	3.26723	3.58424	3.37406
ID563	3.56018	4.08802	3.86621	3.46746	3.58479	3.71146	3.99185	3.72979	3.78595	3.90802	3.65918	3.99219	3.48647	3.90954	3.49255
ID564	3.47984	4.19172	3.72657	3.39625	3.52612	3.62464	3.93871	3.83763	3.73306	3.77903	3.63711	3.78563	3.40477	3.80543	3.45209
ID565	3.6334	4.13217	3.87148	3.57456	3.72065	3.74464	4.01335	3.76674	3.70646	3.94945	3.67693	3.98201	3.60572	3.96614	3.58482
ID566	3.63922	4.21731	3.99134	3.55995	3.74917	3.84699	4.00753	3.79502	3.84489	4.00323	3.81384	4.00631	3.65182	4.0307	3.57958
ID567	3.51483	4.11702	3.8107	3.42947	3.6145	3.66847	3.98483	3.69507	3.74386	3.85224	3.63926	3.8523	3.47729	3.8673	3.45574
ID568	3.4813	4.28167	3.90486	3.42325	3.64768	3.76765	3.95289	3.96445	3.80691	3.92429	3.79384	3.98578	3.50742	3.97177	3.42264
ID569	3.56332	4.15143	3.79958	3.48037	3.64213	3.73148	3.98071	3.73553	3.72004	3.85982	3.66424	3.85079	3.46586	3.88589	3.52539
ID570	3.50261	4.40349	3.88551	3.53357	3.64963	3.76503	4.07223	4.01951	3.89021	3.9348	3.74701	4.00823	3.54146	3.96131	3.53973
ID571	3.58596	4.32854	3.83944	3.51835	3.65536	3.69905	3.98492	3.94344	3.8252	3.91941	3.81634	3.90767	3.52766	3.8638	3.57568
ID572	3.55571	4.19188	3.82342	3.42254	3.60641	3.68964	3.94647	3.81985	3.79493	3.85991	3.69147	3.89801	3.46723	3.86965	3.47901
ID573	3.55668	4.20955	3.84327	3.53873	3.67195	3.72877	4.01502	3.80561	3.84685	3.86052	3.74502	3.89022	3.53727	3.88648	3.59021
ID574	3.51844	4.33281	3.87933	3.4341	3.69409	3.73024	3.92955	3.96438	3.85004	3.90847	3.71997	3.94279	3.46338	3.90447	3.41858
ID575	3.4377	4.18919	3.77646	3.50136	3.50703	3.67123	4.01502	3.75977	3.68829	3.84592	3.61693	3.89836	3.39787	3.88516	3.49665
ID576	3.5223	4.36143	3.81965	3.38779	3.57936	3.69922	3.98884	3.98109	3.74891	3.85227	3.68895	3.93829	3.38307	3.87792	3.45607
ID577	3.59626	4.36406	3.86432	3.48482	3.63419	3.70912	4.02359	4.01743	3.84155	3.88034	3.74449	3.89257	3.51398	3.93412	3.58057
ID578	3.68948	4.46902	3.96482	3.4595	3.73235	3.79838	4.12503	4.05543	3.83654	3.97552	3.75822	4.04125	3.6035	3.99614	3.52439
ID579	3.51967	4.12093	3.86325	3.60532	3.67033	3.76019	4.02363	3.7387	3.79316	3.93205	3.76119	3.96171	3.51134	3.94149	3.55599
ID580	3.64702	4.33775	3.96563	3.56123	3.69485	3.8128	4.10634	4.02212	3.99395	3.99153	3.8635	3.97747	3.55149	3.95532	3.64508
ID581	3.66122	4.35634	3.90343	3.46295	3.68243	3.73358	4.02025	3.97468	3.82996	3.92027	3.77664	4.01258	3.5214	3.94373	3.5719
ID582	3.63262	4.31576	3.89753	3.32516	3.70898	3.70741	3.94428	4.02096	3.81129	3.92402	3.73421	3.95956	3.50122	3.87627	3.3829
ID583	3.56225	4.32699	3.91591	3.53603	3.672	3.77713	4.03918	3.92412	3.87145	3.94867	3.79096	3.96699	3.53797	3.94023	3.55913
ID584	3.42096	4.13858	3.82595	3.36841	3.66637	3.66999	4.01964	3.78719	3.75252	3.79664	3.74193	3.94617	3.45168	3.9314	3.40661
ID585	3.47885	4.12316	3.7176	3.28168	3.49436	3.55169	3.82595	3.65473	3.58246	3.70933	3.43462	3.69529	3.45666	3.66714	3.39055
ID586	3.58724	4.31314	3.95879	3.53844	3.73335	3.79418	4.06013	3.90046	3.88114	3.96526	3.76916	3.99827	3.6189	3.93895	3.56237
ID587	3.52591	4.17418	3.78997	3.36684	3.44383	3.62471	3.88813	3.78649	3.7848	3.83248	3.64936	3.77844	3.36373	3.81667	3.51297
ID588	3.53925	4.2664	3.83029	3.37708	3.65579	3.69122	3.9323	3.87222	3.75261	3.90269	3.74341	3.9423	3.43822	3.8965	3.39513
ID589	3.4606	4.28966	3.86274	3.45221	3.74075	3.70229	3.99041	3.89176	3.75104	3.86465	3.74591	3.94573	3.50228	3.89309	3.4319
ID590	3.53329	4.14667	3.81126	3.41418	3.50726	3.64621	3.9241	3.74419	3.71742	3.86704	3.62666	3.90793	3.4419	3.8545	3.49909
ID591	3.59868	4.0911	3.86006	3.50214	3.64218	3.7424	3.91448	3.73037	3.78984	3.94511	3.73336	3.86924	3.47703	3.84055	3.51103
ID592	3.66454	4.42809	3.97218	3.55574	3.72612	3.82487	4.10528	4.07318	3.96941	4.02331	3.85896	4.06702	3.57411	3.97474	3.64848
ID593	3.28263	4.01392	3.70477	3.37945	3.57198	3.48547	3.87619	3.63329	3.60508	3.75202	3.54848	3.79519	3.3422	3.73723	3.30253
ID594	3.62894	4.26405	3.90373	3.47888	3.66763	3.76087	4.02854	3.87202	3.87817	3.96111	3.7558	3.98406	3.52878	3.88705	3.53933
ID595	3.55035	4.29854	3.82476	3.47836	3.58898	3.66947	4.00531	3.92004	3.77317	3.84929	3.67454	3.86184	3.4674	3.8985	3.51252
ID596	3.46144	4.10849	3.79196	3.45705	3.65848	3.6125	3.93033	3.7381	3.56914	3.84015	3.62925	3.87769	3.48392	3.82419	3.42
ID597	3.67887	4.50497	3.99536	3.46702	3.83618	3.82043	4.14351	4.18744	4.05855	3.96963	3.92477	4.06404	3.56235	4.05722	3.57562
ID598	3.60151	4.3012	3.88787	3.51042	3.6488	3.73851	4.03918	3.91682	3.84437	3.95505	3.73819	4.00253	3.4904	3.88831	3.53324
ID599	3.44431	4.25581	3.79392	3.48215	3.62261	3.62891	3.94281	3.92593	3.77247	3.85571	3.53951	3.89228	3.43127	3.81586	3.4722
ID600	3.56222	4.26017	3.89005	3.50644	3.6531	3.72961	4.07199	3.92255	3.75972	3.94424	3.73998	3.96788	3.51552	3.95561	3.54224
ID601	3.71819	4.13401	4.03638	3.49387	3.88263	3.90481	4.01112	3.7586	3.85	4.06558	3.87637	4.10203	3.59855	4.04075	3.50129
ID602	3.60561	4.3049	3.94021	3.5779	3.70422	3.7219	4.07154	4.0238	3.8888	3.9949	3.77386	4.00482	3.55103	3.98109	3.58974
ID603	3.46247	4.30787	3.84803	3.55048	3.57941	3.73912	4.00803	3.90684	3.83396	3.90316	3.7357	3.92487	3.52415	3.98807	3.51298
ID604	3.51704	4.20039	3.82522	3.44941	3.55043	3.69208	3.93008	3.94485	3.73243	3.84408	3.63708	3.85562	3.4035	3.85113	3.52846
ID605	3.50374	4.41149	3.8407	3.45424	3.65332	3.73383	3.97673	4.02469	3.8185	3.90584	3.76273	3.89469	3.43494	3.90172	3.484
ID606	3.48302	4.26679	3.78537	3.38483	3.46579	3.63374	3.9274	3.8372	3.72569	3.87517	3.64516	3.90888	3.39754	3.88064	3.42076
ID607	3.65979	4.38357	3.95834	3.53711	3.74452	3.81948	4.08806	3.99616	3.84102	4.00631	3.82211	4.04891	3.53621	4.02017	3.54696
ID608	3.78715	4.2939	4.1117	3.5963	3.8531	3.96286	4.11865	3.92358	4.00984	4.13112	3.96804	4.10752	3.67861	4.07418	3.67268
ID609	3.51278	4.12812	3.80871	3.42543	3.47568	3.66078	3.95203	3.74172	3.66436	3.84262	3.64734	3.83163	3.47029	3.87497	3.50909
ID610	3.51906	4.16506	3.86752	3.44008	3.68205	3.72323	4.09534	3.7919	3.73355	3.86581	3.67946	3.9327	3.49892	3.94128	3.44909
ID611	3.62939	4.2217	3.82698	3.43215	3.58544	3.67061	3.98105	3.8643	3.72221	3.86775	3.64803	3.88552	3.51979	3.82417	3.53981
ID612	3.69995	4.38682	4.01276	3.60571	3.7756	3.90093	4.09237	4.049	3.98741	4.06416	3.99307	4.06875	3.60262	4.04962	3.68168
ID613	3.50374	4.17314	3.82246	3.40262	3.51253	3.629	3.98535	3.72473	3.67321	3.87441	3.6088	3.86283	3.55959	3.87014	3.47987
ID614	3.46597	4.19884	3.70374	3.18635	3.41982	3.59879	3.89667	3.78737	3.63393	3.73814	3.55693	3.78914	3.25443	3.74253	3.3166
ID615	3.58508	4.43676	3.93205	3.48472	3.69619	3.71474	4.02233	4.07102	3.81874	3.91497	3.74838	3.95848	3.56374	3.91289	3.54907
ID616	3.53324	4.26395	3.84955	3.56323	3.70822	3.73562	3.98743	3.83108	3.80155	3.89563	3.726	3.89824	3.59255	3.88382	3.5343
ID617	3.63057	4.44746	3.92488	3.49548	3.76367	3.79032	3.97923	4.05079	3.941	3.97879	3.81277	4.00884	3.49516	3.94853	3.50176
ID618	3.52986	4.22459	3.84157	3.24853	3.67589	3.72486	3.91992	3.79316	3.77549	3.85654	3.68502	3.86641	3.40435	3.88741	3.31038
ID619	3.57347	4.25004	3.8898	3.4267	3.56768	3.68865	4.05811	3.87865	3.80588	3.91116	3.70249	3.93944	3.4724	3.81562	3.49037
ID620	3.53641	4.17936	3.7975	3.4121	3.6107	3.64709	3.91718	3.78111	3.71926	3.83604	3.60515	3.86209	3.45117	3.8362	3.4821
ID621	3.60194	4.20142	3.91106	3.52532	3.75352	3.72831	4.07776	3.85857	3.79704	3.93786	3.69993	4.00546	3.54928	3.94543	3.50781
ID622	3.51161	4.10141	3.77109	3.35188	3.47179	3.59831	3.94183	3.75934	3.69385	3.75889	3.58594	3.79222	3.43656	3.79169	3.49712
ID623	3.60571	4.2443	3.89282	3.43643	3.53878	3.75397	4.03765	3.91425	3.75278	3.91801	3.70625	3.92875	3.48814	3.94969	3.54697
ID624	3.47547	4.03446	3.78906	3.34496	3.59162	3.59364	3.95333	3.66541	3.64562	3.78998	3.55138	3.84159	3.46092	3.80693	3.40086
ID625	3.56919	4.41537	3.95764	3.36599	3.77537	3.80546	3.92103	4.05756	3.8657	3.95865	3.79783	4.0222	3.41168	3.96731	3.37659
ID626	3.37914	4.01109	3.68445	3.28882	3.43235	3.54298	3.90067	3.62568	3.60497	3.70313	3.4302	3.76353	3.33078	3.72515	3.37456
ID627	3.34527	4.14635	3.71801	3.32636	3.52037	3.53204	3.84475	3.77703	3.6287	3.74367	3.54679	3.78529	3.3498	3.76414	3.3201
ID628	3.54496	4.18084	3.8714	3.4481	3.59276	3.72543	4.02095	3.83038	3.84476	3.90752	3.73129	3.94359	3.56494	3.91382	3.5178
ID629	3.52357	4.11696	3.7461	3.29629	3.53752	3.58247	3.96007	3.67236	3.66464	3.7765	3.55237	3.76511	3.40963	3.81228	3.40274
ID630	3.61798	4.16975	3.85698	3.44476	3.54227	3.69496	4.0347	3.8338	3.79777	3.90442	3.69358	3.94257	3.44469	3.94284	3.55947
ID631	3.55382	4.35062	3.89571	3.58062	3.71627	3.75263	4.08136	4.02138	3.8516	3.94551	3.78721	4.01183	3.5396	3.94473	3.53421
ID632	3.57959	4.40983	3.95339	3.50306	3.7935	3.76511	4.0334	4.05607	3.93055	3.98979	3.84938	4.03009	3.50699	3.93229	3.4938
ID633	3.44181	4.45457	3.82166	3.48479	3.65063	3.70242	3.97723	4.04241	3.85338	3.87344	3.75249	3.92862	3.42222	3.87946	3.4341
ID634	3.44348	4.08999	3.72212	3.38481	3.49582	3.55513	3.85143	3.73356	3.66536	3.79518	3.5471	3.79346	3.40951	3.75477	3.42864
ID635	3.45052	4.39565	3.8297	3.52563	3.57537	3.67195	4.01372	4.0583	3.72341	3.88181	3.65577	3.91245	3.45309	3.89416	3.50689
ID636	3.62174	4.40659	3.90054	3.36883	3.66961	3.72516	3.99272	4.02863	3.80938	3.89957	3.71553	3.97045	3.4407	3.8829	3.46698
ID637	3.60235	4.5922	4.00762	3.47186	3.82364	3.82387	4.01845	4.1627	3.9664	4.02315	3.89305	4.09839	3.54298	3.95392	3.51333
ID638	3.46924	4.32484	3.86663	3.46868	3.7034	3.67798	4.04036	4.00598	3.7469	3.9102	3.73166	3.94699	3.51804	3.92648	3.44634
ID639	3.57395	4.28481	3.83523	3.58936	3.63387	3.74742	4.03163	3.87734	3.75767	3.92473	3.67789	3.95569	3.51392	3.92687	3.60441
ID640	3.49923	4.17405	3.77964	3.53845	3.5636	3.66405	3.97756	3.81645	3.69863	3.87205	3.61948	3.89464	3.44505	3.88717	3.53431
ID641	3.55972	4.42487	3.91647	3.42803	3.67335	3.68167	4.00552	4.03328	3.81861	3.89149	3.67486	3.99117	3.51778	3.89098	3.47032
ID642	3.59747	4.51941	3.98196	3.51756	3.77383	3.8246	4.01906	4.13673	3.9863	4.03027	3.85422	4.02189	3.50567	3.96463	3.50578
ID643	3.58399	4.17346	3.88096	3.55896	3.64908	3.78467	4.02788	3.76905	3.75904	3.93165	3.64624	3.97734	3.53034	3.90349	3.57075
ID644	3.54724	4.40573	3.89716	3.54286	3.72772	3.78183	4.08387	4.04442	3.84768	3.94264	3.76614	4.03271	3.45693	3.94774	3.54449
ID645	3.39392	4.16142	3.72692	3.31762	3.46964	3.59721	3.87193	3.75526	3.62042	3.72154	3.52642	3.78671	3.37205	3.76458	3.37382
ID646	3.48788	4.25452	3.87281	3.52043	3.73009	3.73583	4.06466	3.93938	3.74796	3.9107	3.76255	3.97553	3.49846	3.93256	3.47834
ID647	3.61505	4.42518	3.98029	3.59033	3.79855	3.85377	4.11087	4.006	3.90627	4.02693	3.8141	4.05048	3.55476	4.06957	3.59888
ID648	3.47298	4.20995	3.88117	3.56985	3.73737	3.70073	4.03203	3.81081	3.76123	3.91132	3.70717	3.95203	3.57125	3.90819	3.48861
ID649	3.59336	4.58613	4.01067	3.60302	3.77874	3.82556	4.04212	4.18189	4.05003	4.05349	3.89639	4.05971	3.53795	3.96527	3.68896
ID650	3.62084	4.33678	3.9222	3.48973	3.69259	3.76388	4.08058	3.98301	3.84365	3.92559	3.76765	3.96734	3.51177	3.92731	3.54941
ID651	3.66209	4.37271	3.83643	3.52686	3.67781	3.71818	4.04811	3.99871	3.75537	3.89459	3.71612	3.92426	3.51884	3.85977	3.60047
ID652	3.69386	4.44953	4.05136	3.38669	3.74031	3.83055	4.0858	4.12803	3.95561	4.02522	3.91582	4.08092	3.55618	4.06725	3.49276
ID653	3.54269	4.30566	3.84584	3.31002	3.58444	3.66327	3.90573	3.97453	3.69343	3.846	3.6453	3.87075	3.41395	3.85065	3.33271
ID654	3.54147	4.25427	3.83533	3.43269	3.6525	3.7085	3.99287	3.95864	3.80436	3.87397	3.64644	3.87378	3.41318	3.88961	3.47856
ID655	3.4555	4.16249	3.8027	3.45501	3.53546	3.6548	4.0319	3.82155	3.74822	3.84826	3.64213	3.86456	3.42595	3.87651	3.47131
ID656	3.62576	4.31745	3.89908	3.2839	3.65888	3.76571	3.9729	3.95543	3.89308	3.88309	3.79346	3.91999	3.45652	3.90824	3.38339
ID657	3.43873	4.23057	3.84244	3.56189	3.64233	3.65972	4.04611	3.92633	3.76569	3.89163	3.61466	3.92226	3.51512	3.89116	3.48411
ID658	3.56342	4.05824	3.88956	3.46748	3.66056	3.77717	3.94682	3.80847	3.79473	3.94546	3.74143	3.93966	3.48926	3.88483	3.50855
ID659	3.55555	4.33736	3.906	3.5269	3.65167	3.73775	4.10324	4.0017	3.81013	3.95091	3.75902	4.03411	3.51587	4.02869	3.54795
ID660	3.40147	4.33671	3.76192	3.4353	3.56396	3.61734	3.91759	3.97181	3.75501	3.81201	3.66723	3.86015	3.43541	3.81047	3.40409
ID661	3.37421	4.14715	3.67649	3.39162	3.35058	3.47408	3.93207	3.7896	3.57611	3.73481	3.47723	3.76401	3.35043	3.80984	3.38885
ID662	3.45525	4.23401	3.81766	3.48177	3.49821	3.62492	4.04282	3.85534	3.7725	3.86451	3.62432	3.90251	3.44629	3.93238	3.49688
ID663	3.56905	4.50731	3.98027	3.65439	3.83293	3.82401	4.06134	4.07836	4.02577	4.00734	3.90807	4.039	3.64438	3.97152	3.60969
ID664	3.71407	4.62249	4.042	3.7192	3.93754	3.90432	4.18825	4.19353	4.00338	4.06978	3.94015	4.1109	3.75381	4.15067	3.68367
ID665	3.46263	4.15581	3.71667	3.31574	3.43507	3.50236	3.86307	3.8632	3.70946	3.73538	3.56802	3.80257	3.35763	3.74653	3.40823
ID666	3.47928	4.42258	3.99155	3.53749	3.65194	3.7827	3.9664	4.02148	3.99409	4.00199	3.87192	4.03302	3.52075	4.03215	3.50314
ID667	3.59913	4.18526	3.86371	3.48624	3.65508	3.73723	3.9802	3.78488	3.75678	3.9054	3.67941	3.90812	3.50678	3.92999	3.49931
ID668	3.62782	4.61511	4.05344	3.66717	3.82921	3.90591	4.15464	4.2602	4.10775	4.09469	3.97661	4.0847	3.61586	4.04334	3.67564
ID669	3.51416	4.25633	3.83966	3.44419	3.60109	3.69449	3.96422	3.90084	3.73833	3.84509	3.66758	3.87299	3.47044	3.92579	3.48263
ID670	3.50081	4.25536	3.83209	3.46336	3.62016	3.66119	3.94889	3.79336	3.66287	3.86101	3.6219	3.93953	3.46229	3.83745	3.46167
ID671	3.58531	4.41674	3.95079	3.55236	3.7596	3.80212	4.0232	3.98453	3.89818	3.9899	3.82732	4.01082	3.55297	3.9789	3.52316
ID672	3.41216	4.22087	3.85387	3.45527	3.58821	3.69606	3.9231	3.89207	3.77932	3.8622	3.69773	3.80758	3.42886	3.85851	3.4568
ID673	3.50046	4.14322	3.77278	3.43301	3.585	3.68855	3.93385	3.83203	3.68437	3.80344	3.61664	3.84061	3.45259	3.89204	3.45973
ID674	3.61919	4.24652	3.91917	3.49989	3.76423	3.79086	4.03824	3.84888	3.89042	3.97151	3.76676	3.99214	3.5395	4.01204	3.50635
ID675	3.55875	4.09328	3.80006	3.39797	3.59113	3.6481	3.9323	3.65699	3.62945	3.80407	3.60202	3.80274	3.54012	3.78099	3.44959
ID676	3.72505	4.39134	3.9505	3.57196	3.7538	3.84879	4.08033	4.1277	3.8589	4.05248	3.83798	3.97853	3.61018	3.97438	3.6344
ID677	3.56443	4.52901	3.99363	3.45084	3.73135	3.79431	4.04188	4.15814	3.94276	3.9476	3.91443	4.05005	3.54615	4.05101	3.53035
ID678	3.5002	4.41189	3.86495	3.56971	3.68264	3.66552	4.06799	4.07612	3.7289	3.91287	3.73035	3.94124	3.502	3.94196	3.52508
ID679	3.53433	4.08425	3.89007	3.55935	3.65574	3.69176	4.0781	3.65347	3.69259	3.91363	3.72804	3.93575	3.5669	3.9406	3.52522
ID680	3.39208	4.25735	3.8834	3.55256	3.72217	3.64833	4.00943	3.85151	3.7529	3.87404	3.77726	3.9334	3.52784	3.89207	3.42714
ID681	3.41443	4.00905	3.73671	3.34831	3.45801	3.59211	3.90929	3.64834	3.6127	3.78894	3.6194	3.81519	3.34337	3.81194	3.40992
ID682	3.53198	4.35032	3.90235	3.55524	3.69622	3.81165	4.08262	3.98982	3.84094	3.94484	3.7803	3.96131	3.53677	3.99412	3.53962
ID683	3.49348	4.17862	3.72866	3.3296	3.50324	3.58132	3.91142	3.77461	3.55906	3.74538	3.42881	3.75539	3.41419	3.77423	3.42675
ID684	3.57009	4.4227	3.9341	3.52152	3.77443	3.69331	4.05569	4.05276	3.93573	3.96524	3.83954	4.05213	3.55852	3.9695	3.54743
ID685	3.51309	4.21845	3.91716	3.56209	3.70713	3.72109	3.98654	3.88254	3.8443	3.96068	3.82235	3.97282	3.58507	3.96927	3.51922
ID686	3.60392	4.35384	3.94649	3.61997	3.74939	3.83729	4.07249	4.02025	3.83694	4.03232	3.82539	4.04021	3.6559	4.05243	3.58879
ID687	3.61685	4.12504	3.93063	3.50101	3.75168	3.76643	4.03004	3.78795	3.72221	3.96014	3.6448	3.97791	3.52131	4.00869	3.50792
ID688	3.67252	4.39469	3.99332	3.59154	3.73506	3.84692	4.11355	3.97857	3.93865	4.02793	3.85863	4.00016	3.55739	4.07207	3.67337
ID689	3.5452	4.00142	3.70722	3.37172	3.54009	3.61412	3.83003	3.58881	3.66559	3.80781	3.62855	3.76287	3.41299	3.68143	3.48825
ID690	3.5674	4.29841	3.8798	3.44573	3.68605	3.71066	3.96966	3.86097	3.79435	3.90703	3.73602	3.91147	3.47495	3.84842	3.50396
ID691	3.55657	4.23865	3.85276	3.46969	3.64458	3.73637	4.02968	3.88366	3.81067	3.89334	3.74435	3.90499	3.4729	3.89505	3.52812
ID692	3.62068	4.18582	3.81357	3.48403	3.61911	3.67436	4.00049	3.77401	3.75771	3.89179	3.66314	3.82809	3.46707	3.81444	3.56261
ID693	3.49097	4.11303	3.78874	3.36471	3.57093	3.59565	3.9783	3.71265	3.71185	3.83895	3.63379	3.8403	3.32447	3.81322	3.4759
ID694	3.49798	4.2138	3.77146	3.42553	3.57639	3.64296	3.95448	3.7693	3.7049	3.81121	3.58942	3.86513	3.45965	3.84046	3.47029
ID695	3.41097	4.15315	3.76301	3.49941	3.59289	3.64788	3.94744	3.79267	3.74157	3.86613	3.66596	3.84851	3.3862	3.82378	3.44776
ID696	3.53557	4.08576	3.84633	3.48732	3.59986	3.72507	3.94859	3.6946	3.78662	3.90265	3.68755	3.86226	3.46328	3.86537	3.52268
ID697	3.51252	4.40045	3.89226	3.48611	3.69197	3.75804	4.00321	4.03639	3.90036	3.92085	3.79223	3.96543	3.52144	3.908	3.50481
ID698	3.444	4.12498	3.74321	3.42349	3.54942	3.605	3.93504	3.70485	3.6154	3.7487	3.56291	3.80169	3.52367	3.82238	3.42722
ID699	3.67216	4.19939	3.82452	3.42569	3.63994	3.73891	3.97429	3.84929	3.80644	3.89293	3.70005	3.91407	3.46917	3.85412	3.58408
ID700	3.43549	3.96562	3.68339	3.30927	3.47138	3.53769	3.85668	3.56281	3.51469	3.73349	3.48313	3.75923	3.32082	3.74962	3.37883
ID701	3.58188	4.24608	3.86772	3.48483	3.68061	3.72137	4.01276	3.85038	3.76247	3.9043	3.72562	3.95883	3.51501	3.90767	3.52127
ID702	3.53369	4.22954	3.82746	3.39341	3.71951	3.64154	3.94592	3.87771	3.72735	3.83769	3.65623	3.90867	3.3937	3.89402	3.30982
ID703	3.49132	4.16603	3.8062	3.42085	3.57603	3.66458	3.91436	3.85444	3.79333	3.86972	3.67003	3.87234	3.4664	3.81929	3.47189
ID704	3.6518	4.45173	4.00712	3.48589	3.7293	3.83231	4.08284	4.05125	3.91901	4.00809	3.76085	4.00424	3.60588	4.04333	3.61696
ID705	3.50919	4.27018	3.79283	3.46666	3.62192	3.63954	3.94723	3.88797	3.71883	3.81826	3.59622	3.85194	3.50783	3.8183	3.47296
ID706	3.65978	4.34251	3.9071	3.38406	3.73492	3.75775	3.99636	3.9315	3.87104	3.93105	3.75184	3.99695	3.53889	3.83942	3.53026
ID707	3.48649	4.40672	3.85811	3.48461	3.80413	3.64912	3.95775	4.0651	3.84132	3.87594	3.77511	3.97562	3.53529	3.91574	3.38718
ID708	3.54937	4.23558	3.80157	3.27406	3.57285	3.62664	3.98835	3.88688	3.80941	3.83476	3.60117	3.84977	3.40397	3.82345	3.40565
ID709	3.54372	4.23076	3.87805	3.3135	3.63976	3.68199	3.9559	3.87259	3.7553	3.84773	3.69604	3.93549	3.41773	3.90383	3.35758
ID710	3.58632	4.40447	4.00335	3.49315	3.72641	3.80194	4.06869	4.08783	3.88187	3.96798	3.80145	4.04464	3.55192	4.03621	3.5294
ID711	3.536	4.37665	3.88246	3.42643	3.68161	3.71909	4.00059	3.92603	3.73809	3.89186	3.7021	3.9329	3.5325	3.92337	3.48685
ID712	3.61124	4.19823	3.87183	3.47283	3.78379	3.72151	3.98433	3.7489	3.83315	3.88934	3.72852	3.93006	3.61197	3.91745	3.50743
ID713	3.66338	4.23137	4.03459	3.52149	3.69919	3.80587	4.07113	3.82077	3.73718	3.95607	3.74378	3.97366	3.60233	3.95204	3.60107
ID714	3.32933	4.20067	3.77264	3.46895	3.59967	3.60232	3.97038	3.87429	3.7256	3.80989	3.68892	3.88088	3.40336	3.86275	3.39736
ID715	3.62745	4.47528	3.98156	3.27548	3.75211	3.75983	3.96037	4.03517	3.94452	3.98078	3.78445	4.02784	3.36132	3.94438	3.3386
ID716	3.56802	4.37286	3.91421	3.55163	3.70537	3.77586	4.03502	4.00628	3.89963	3.94899	3.77742	3.95198	3.56713	3.93557	3.5167
ID717	3.52104	4.23906	3.84051	3.28336	3.63001	3.71006	3.90266	3.86691	3.78802	3.84756	3.72518	3.86783	3.39674	3.85099	3.38146
ID718	3.63672	4.27945	3.96401	3.59611	3.71352	3.82996	4.04965	3.84452	3.85906	3.98311	3.79784	3.95696	3.57512	3.9832	3.61834
ID719	3.54782	4.23037	3.84116	3.47472	3.64878	3.72075	3.99538	3.82104	3.72077	3.86609	3.67282	3.88132	3.5128	3.88038	3.51877
ID720	3.47138	4.2422	3.78251	3.29194	3.56242	3.58882	3.89615	3.85326	3.71523	3.79826	3.59727	3.87324	3.37441	3.76226	3.40008
ID721	3.43497	4.18164	3.7856	3.508	3.57714	3.65641	3.9758	3.84811	3.72533	3.84328	3.59603	3.87276	3.44199	3.86206	3.47639
ID722	3.55826	4.33642	3.85443	3.41912	3.61897	3.69833	4.06457	3.97163	3.86466	3.85932	3.73119	3.90889	3.48555	3.91149	3.51923
ID723	3.46601	4.17152	3.8035	3.3881	3.63298	3.57996	3.95611	3.84944	3.72052	3.82193	3.63402	3.93006	3.4323	3.81168	3.40947
ID724	3.45413	4.15867	3.78865	3.46408	3.59073	3.67677	3.97303	3.7683	3.73282	3.80496	3.64509	3.82982	3.46819	3.82663	3.47948
ID725	3.70392	4.63674	4.10978	3.63504	3.93267	3.92084	4.04541	4.24604	4.07109	4.1469	3.99366	4.1537	3.56305	4.03921	3.59614
ID726	3.53378	4.4419	3.86275	3.49772	3.67877	3.70422	3.97031	4.04993	3.86198	3.90601	3.75663	3.94962	3.46282	3.8786	3.53997
ID727	3.55899	4.26433	3.87525	3.44706	3.65772	3.69832	3.9631	3.85498	3.82861	3.87686	3.72898	3.90272	3.50244	3.92485	3.48104
ID728	3.51843	4.2256	3.88028	3.42166	3.62957	3.67681	3.92141	3.91308	3.83614	3.88669	3.67829	3.87923	3.43504	3.84694	3.53273
ID729	3.65507	4.16171	3.89412	3.45872	3.69486	3.78798	4.06441	3.73771	3.77014	3.90675	3.70246	3.97027	3.56678	3.91532	3.54441
ID730	3.42578	4.09922	3.84601	3.49981	3.69736	3.67353	3.96162	3.76181	3.73391	3.90105	3.72291	3.92993	3.43728	3.94966	3.44032
ID731	3.49066	4.21499	3.71589	3.30418	3.52464	3.54869	3.94635	3.78576	3.7107	3.69269	3.56332	3.80949	3.35553	3.77818	3.43188
ID732	3.47127	4.26967	3.87996	3.42656	3.58393	3.72055	4.01051	3.90133	3.84101	3.90485	3.73517	3.95209	3.4527	3.92437	3.42924
ID733	3.51538	4.29735	3.82742	3.32689	3.59262	3.67199	4.00505	3.90038	3.83711	3.88373	3.72071	3.89964	3.37194	3.88491	3.39899
ID734	3.553	4.09484	3.75218	3.3615	3.4884	3.58562	3.92054	3.66114	3.68549	3.78637	3.60295	3.78402	3.39921	3.76329	3.5023
ID735	3.59415	4.42513	3.94818	3.54891	3.79459	3.79233	4.01596	4.00479	3.90061	4.00169	3.84541	4.04289	3.49711	3.96739	3.54984
ID736	3.58594	4.47928	3.94006	3.50929	3.69004	3.71916	4.08205	4.09755	3.91498	3.9808	3.79678	4.00928	3.56817	3.93652	3.58138
ID737	3.47002	4.12163	3.82903	3.43725	3.55495	3.54981	4.00347	3.82584	3.71962	3.83892	3.61305	3.89454	3.46778	3.8817	3.45793
ID738	3.52299	4.10298	3.79015	3.41613	3.54027	3.5942	3.98047	3.73176	3.68344	3.79135	3.58392	3.86096	3.51015	3.76942	3.48312
ID739	3.59614	4.4173	3.89177	3.40675	3.70115	3.74946	4.03432	3.9985	3.8289	3.90063	3.74258	3.97403	3.47792	3.90152	3.48184
ID740	3.48766	4.18986	3.80995	3.45166	3.53573	3.66761	3.93412	3.78321	3.72579	3.87682	3.67703	3.8919	3.4261	3.82605	3.47761
ID741	3.50148	4.28193	3.80894	3.51135	3.59455	3.68477	3.98043	3.85043	3.7626	3.88933	3.68115	3.88718	3.44481	3.87929	3.54314
ID742	3.51198	4.07424	3.83766	3.41658	3.61569	3.67415	4.00953	3.73608	3.71005	3.8461	3.6277	3.90018	3.43754	3.92313	3.4489
ID743	3.56186	4.24077	3.8661	3.48586	3.59989	3.75012	4.0604	3.84024	3.72034	3.90851	3.68307	3.95645	3.46919	3.91441	3.53126
ID744	3.50488	4.26211	3.8892	3.48661	3.69746	3.70952	4.0533	3.98951	3.79754	3.90811	3.75471	3.96848	3.47362	3.94271	3.50038
ID745	3.66621	4.40059	4.00328	3.48175	3.79949	3.87734	4.09995	4.00332	3.89348	4.00841	3.8038	4.08793	3.56034	4.08553	3.54039
ID746	3.57872	4.30065	3.92658	3.53347	3.68138	3.75162	3.99895	3.92438	3.79349	3.93734	3.75957	3.97702	3.5198	3.96165	3.4755
ID747	3.61427	4.49074	3.9375	3.55601	3.67337	3.75207	4.07395	4.1421	3.90202	3.94783	3.78314	4.00891	3.61988	4.03569	3.5716
ID748	3.54094	4.24699	3.83019	3.4764	3.62025	3.67232	3.98822	3.78441	3.7909	3.9118	3.66453	3.96482	3.4831	3.90051	3.47166
ID749	3.6247	4.4287	3.92759	3.50397	3.81218	3.786	4.00846	3.95895	3.8058	3.9478	3.78004	4.03493	3.6103	3.97438	3.47599
ID750	3.53843	4.42539	3.85913	3.47451	3.68315	3.76198	3.98304	4.08054	3.90761	3.92467	3.81246	3.97794	3.48125	3.92141	3.50267
ID751	3.64698	4.25947	3.96051	3.33964	3.72572	3.79093	3.98565	3.88698	3.83569	3.97189	3.78249	4.00187	3.44279	4.05746	3.42298
ID752	3.68251	4.45751	4.04937	3.62639	3.87535	3.91761	4.06338	4.02874	4.0014	4.06579	3.92262	4.05964	3.67172	4.05536	3.63998
ID753	3.54276	4.04464	3.76563	3.39301	3.51	3.62043	3.96441	3.6506	3.66271	3.82879	3.49982	3.86826	3.46367	3.85515	3.49838
ID754	3.47922	4.05293	3.80915	3.46154	3.6199	3.5954	3.96321	3.7207	3.68257	3.84587	3.65923	3.85615	3.41253	3.84746	3.43916
ID755	3.49368	4.15134	3.78269	3.50386	3.5779	3.6777	4.01111	3.78634	3.6149	3.8601	3.52039	3.85332	3.43759	3.86364	3.50629
ID756	3.38554	4.14855	3.76994	3.29805	3.48689	3.63443	3.89991	3.77329	3.69885	3.75919	3.54617	3.79963	3.40924	3.81286	3.38833
ID757	3.45076	4.06943	3.73419	3.4672	3.53603	3.65582	3.91472	3.70895	3.70088	3.79697	3.61572	3.7762	3.37435	3.85781	3.50794
ID758	3.58385	4.27244	3.92272	3.54143	3.69411	3.79784	4.04798	3.91478	3.85105	3.95078	3.78511	3.97289	3.56379	3.95753	3.54568
ID759	3.50637	4.30664	3.87293	3.43237	3.56687	3.68991	3.98299	3.91628	3.85198	3.88427	3.73455	3.93731	3.4344	3.89839	3.4975
ID760	3.57948	4.24196	3.91459	3.55495	3.65585	3.75764	4.03723	3.87387	3.77594	3.93458	3.77072	3.94065	3.54242	3.92169	3.56054
ID761	3.4107	4.05054	3.67931	3.32562	3.48144	3.54102	3.87867	3.74281	3.62468	3.73754	3.52101	3.7644	3.29009	3.75267	3.40413
ID762	3.57979	4.30482	3.92586	3.48742	3.67984	3.7632	4.02307	3.93186	3.87147	3.96167	3.76836	3.97325	3.49973	3.95427	3.52335
ID763	3.45854	4.16708	3.81771	3.51412	3.64859	3.70583	3.97468	3.80183	3.70031	3.84597	3.53524	3.96127	3.4651	3.86912	3.49645
ID764	3.53915	4.30519	3.81857	3.43802	3.62037	3.72853	4.05032	3.92023	3.70613	3.87369	3.66484	3.90984	3.45334	3.90788	3.46622
ID765	3.59531	4.19152	3.84701	3.39733	3.51438	3.69898	4.06511	3.86753	3.78028	3.86263	3.66212	3.88935	3.49309	3.92154	3.56101
ID766	3.50761	4.08344	3.74477	3.50135	3.55323	3.66729	3.92355	3.72574	3.64801	3.84365	3.58603	3.84544	3.52864	3.89051	3.51825
ID767	3.41297	4.08827	3.71918	3.30857	3.45946	3.47028	3.91514	3.71257	3.69696	3.74945	3.53656	3.81401	3.41836	3.7926	3.34454
ID768	3.611	4.22487	3.8571	3.56114	3.66303	3.73687	4.00398	3.80521	3.79927	3.93063	3.71938	3.96326	3.55328	3.91665	3.58843
ID769	3.44272	4.2123	3.75753	3.52551	3.5179	3.66115	4.03741	3.82445	3.70689	3.86645	3.61022	3.88529	3.40826	3.84941	3.48458
ID770	3.65522	4.35602	3.904	3.34833	3.64669	3.74346	3.98073	4.00649	3.76384	3.89486	3.75184	3.94493	3.46522	3.90137	3.46733
ID771	3.31872	4.2278	3.75557	3.3786	3.61346	3.5757	3.93413	3.84761	3.65935	3.77797	3.62031	3.83839	3.3401	3.8747	3.37569
ID772	3.486	4.37716	3.83553	3.581	3.62994	3.72838	3.99314	3.98104	3.84533	3.93168	3.75965	3.90825	3.48388	3.90585	3.53767
ID773	3.56034	4.20589	3.85746	3.52636	3.70208	3.70722	3.97737	3.75785	3.70685	3.88523	3.59397	3.92127	3.56047	3.88559	3.52546
ID774	3.6933	4.17958	3.94059	3.53577	3.69133	3.78929	4.0647	3.8649	3.83932	4.02531	3.79097	3.97275	3.58882	3.936	3.60057
ID775	3.49191	4.21179	3.7824	3.53276	3.59136	3.65835	4.01157	3.78641	3.72247	3.84273	3.6507	3.82782	3.46602	3.84218	3.52348
ID776	3.7217	4.59516	4.06348	3.5722	3.87413	3.90013	4.19537	4.22962	4.00738	4.09308	3.93239	4.15603	3.61182	4.07545	3.59117
ID777	3.59805	4.37276	3.96213	3.60671	3.74143	3.82743	4.01123	3.99013	3.84271	3.98061	3.83561	3.99625	3.63288	3.98017	3.55716
ID778	3.56472	4.50846	4.0241	NA	3.99836	3.89301	4.0638	4.11719	4.03305	4.13129	4.01304	4.12776	3.62018	3.92183	3.66556
ID779	3.572	4.12211	3.84519	3.52233	3.59755	3.72171	4.00393	3.77122	3.76254	3.87375	3.72776	3.8249	3.48815	3.92523	3.55381
ID780	3.47335	4.22132	3.76955	3.41312	3.57376	3.61565	3.94748	3.85974	3.75932	3.817	3.64012	3.8372	3.41708	3.80918	3.46604
ID781	3.60291	4.32832	3.92328	3.50838	3.63506	3.77293	4.09219	4.02436	3.89444	3.9399	3.75868	3.99237	3.56773	3.98861	3.603
ID782	3.68218	4.3221	4.00591	3.59983	3.717	3.82469	4.14717	3.955	3.88916	4.07253	3.79934	4.05342	3.53549	4.04229	3.60222
[truncated: 17 more rows]

## Sheet: NIHM_WholeBlood
	MTND6	MTRNR2	MTATP6	MTND4L	MTND3	MTCYB	MTCO1	MTRNR1	MTND1	MTND4	MTND2	MTCO2	MTATP8	MTCO3	MTND5
[truncated: 908 more rows]

[truncated: 37 more sheets: Geuvadis_LCL, GTEx_AdiposeSubcutaneous, GTEx_AdiposeVisceralOmentum, GTEx_AdrenalGland, GTEx_CellsEBVtransformedlympho, GTEx_ArteryAorta, GTEx_ArteryCoronary, GTEx_ArteryTibial, GTEx_WholeBlood, GTEx_BrainAnteriorcingulatecor, GTEx_BrainCaudatebasalganglia, GTEx_BrainCerebellarHemisphere, GTEx_BrainCerebellum, GTEx_BrainCortex, GTEx_BrainFrontalCortexBA9, GTEx_BrainHippocampus, GTEx_BrainHypothalamus, GTEx_BrainNucleusaccumbensbasa, GTEx_BrainPutamenbasalganglia, GTEx_BreastMammaryTissue …]
