# Supplementary material for: Nuclear genetic regulation of the human mitochondrial transcriptome
Source: eLife journal article supplement (doi:10.7554/elife.41927), 2019-02-18
Supplement: supp [file elife-41927-supp-v1.zip › elife_poa_e41927_Supplementary_File_5.xlsx]

## Sheet: Legend
Supplementary File 5: Population, sex and allele information for cell lines used in qPCR valdation experiments

## Sheet: File S5
Cell Line	Population	rs2304694	Sex
GM11919	CEPH/UTAH	C/C	Male
GM11932	CEPH/UTAH	C/C	Male
GM12003	CEPH/UTAH	A/A	Male
GM12414	CEPH/UTAH	C/C	Female
GM12717	CEPH/UTAH	A/A	Female
GM12842	CEPH/UTAH	A/A	Male
GM20582	TOSCANI IN ITALIA	A/A	Male
GM20822	TOSCANI IN ITALIA	C/C	Male
HG00118	BRITISH FROM ENGLAND AND SCOTLAND, UK	A/A	Female
HG00254	BRITISH FROM ENGLAND AND SCOTLAND, UK	C/C	Female
HG00284	FINNISH IN FINLAND	A/A	Male
HG00290	FINNISH IN FINLAND	C/C	Male
HG01524	IBERIAN POPULATIONS IN SPAIN	C/C	Male
HG01625	IBERIAN POPULATIONS IN SPAIN	A/A	Male
HG01631	IBERIAN POPULATIONS IN SPAIN	C/C	Male
HG01777	IBERIAN POPULATIONS IN SPAIN	A/A	Male
HG01800	CHINESE DAI IN XISHUANGBANNA, CHINA	C/C	Female
HG01804	CHINESE DAI IN XISHUANGBANNA, CHINA	A/A	Female
HG01812	CHINESE DAI IN XISHUANGBANNA, CHINA	C/C	Female
HG01815	CHINESE DAI IN XISHUANGBANNA, CHINA	A/A	Female
