# Supplementary figures and images for: Nuclear genetic regulation of the human mitochondrial transcriptome
Source: eLife journal article supplement (doi:10.7554/elife.41927), 2019-02-18

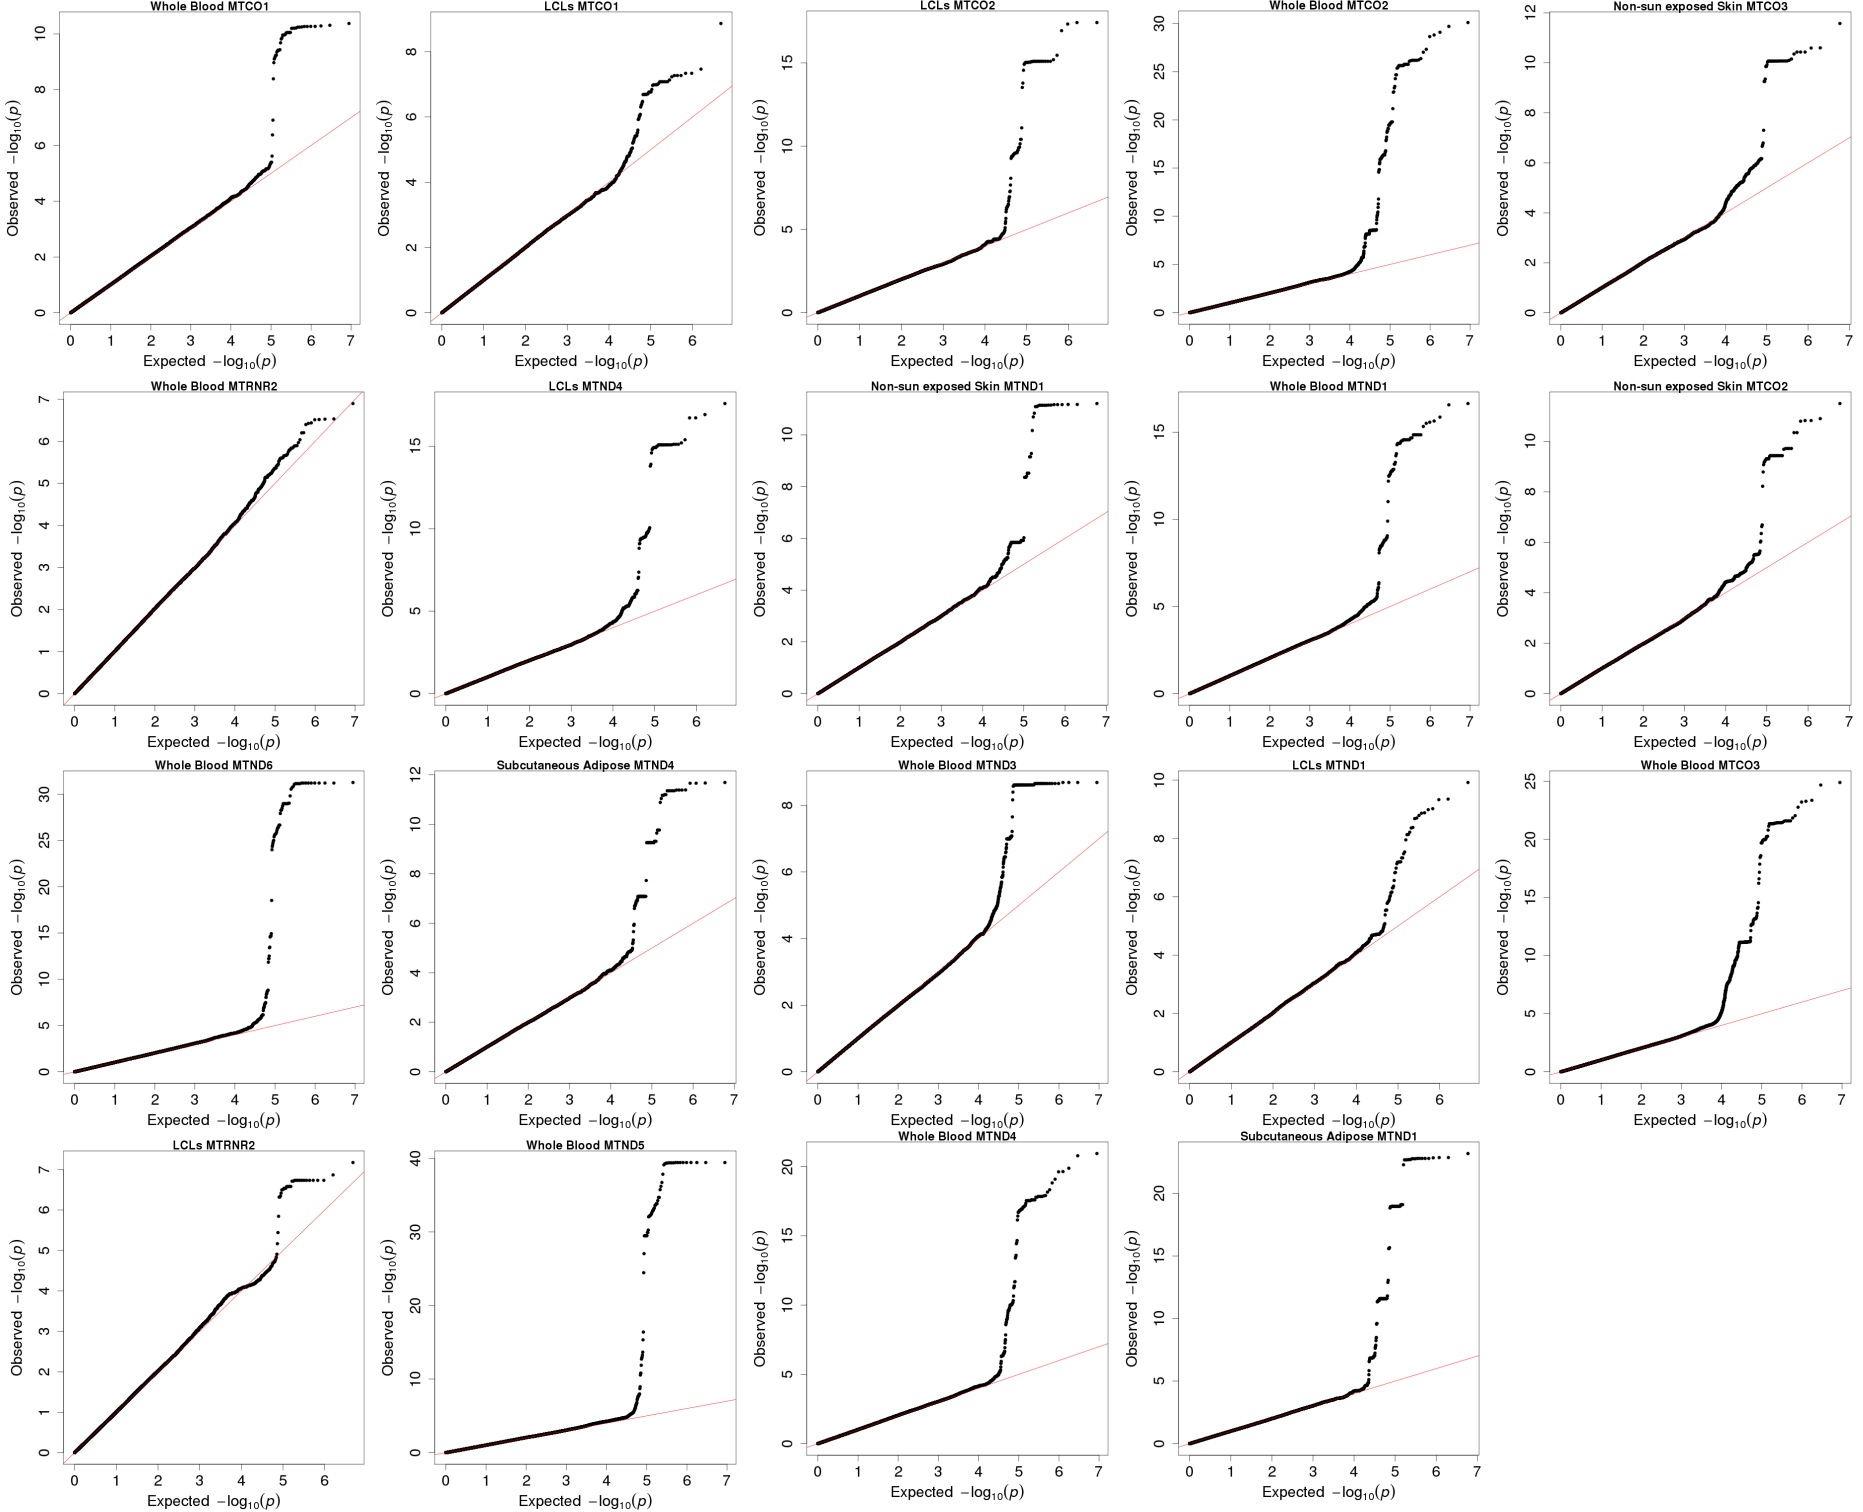

Supplement: supp [file elife-41927-supp-v1.zip › elife_poa_e41927_Figure_2_figure_supplement_2.pdf]
